# Supplementary material for: The Circular RNA Landscape of Non-Small Cell Lung Cancer Cells
Source: MDPI journal article supplement (doi:10.3390/cancers12051091), 2020-04-28
Supplement: s1 [file s1]

## Figure 11c: TNFRSF21 overexpression

Replicate 1: marker for TNFRSF21

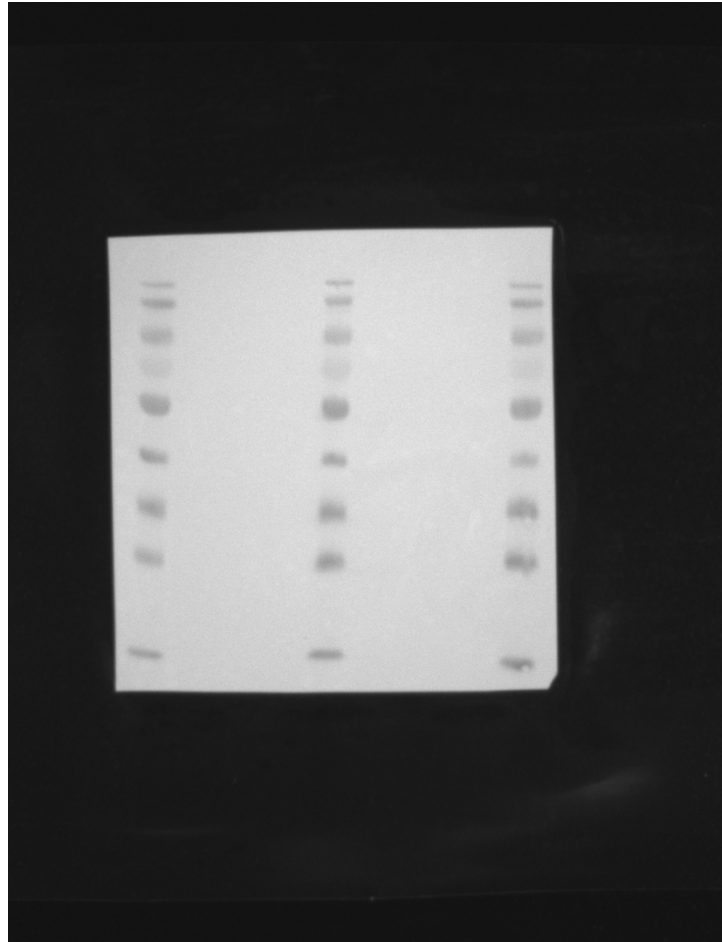

## Figure 11c: TNFRSF21 overexpression

Replicate 1: TNFRSF21

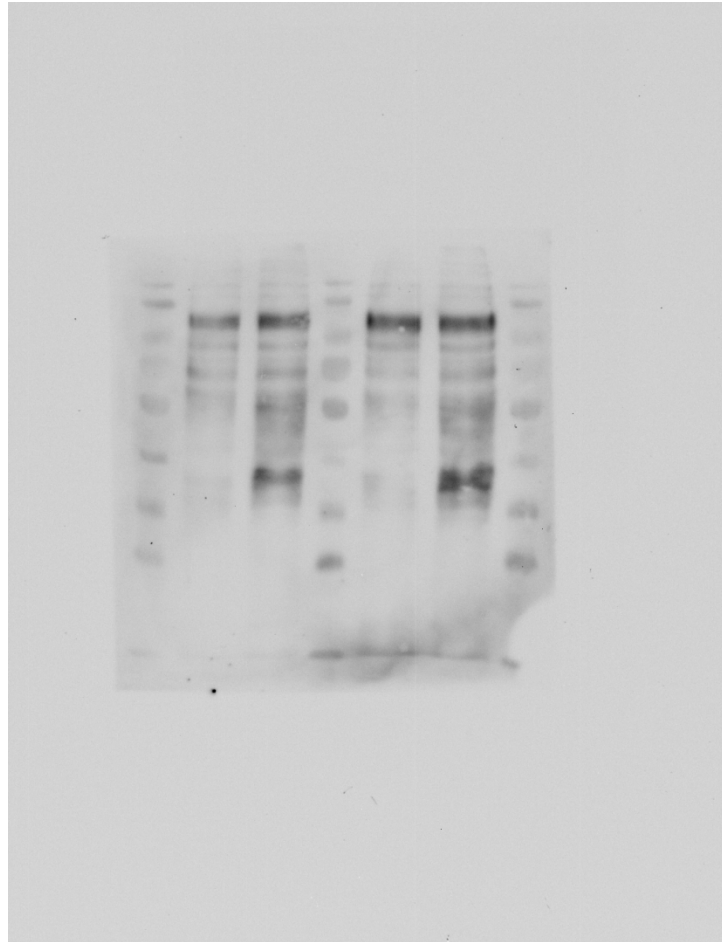

**From left to right:** empty vector control (30 $\mu$ g protein), TNFRSF21 overexpression (30 $\mu$ g protein), empty vector control (50 $\mu$ g protein), TNFRSF21 overexpression (50 $\mu$ g protein)

## Figure 11c: TNFRSF21 overexpression

Replicate 1: marker for  $\beta$ -Actin

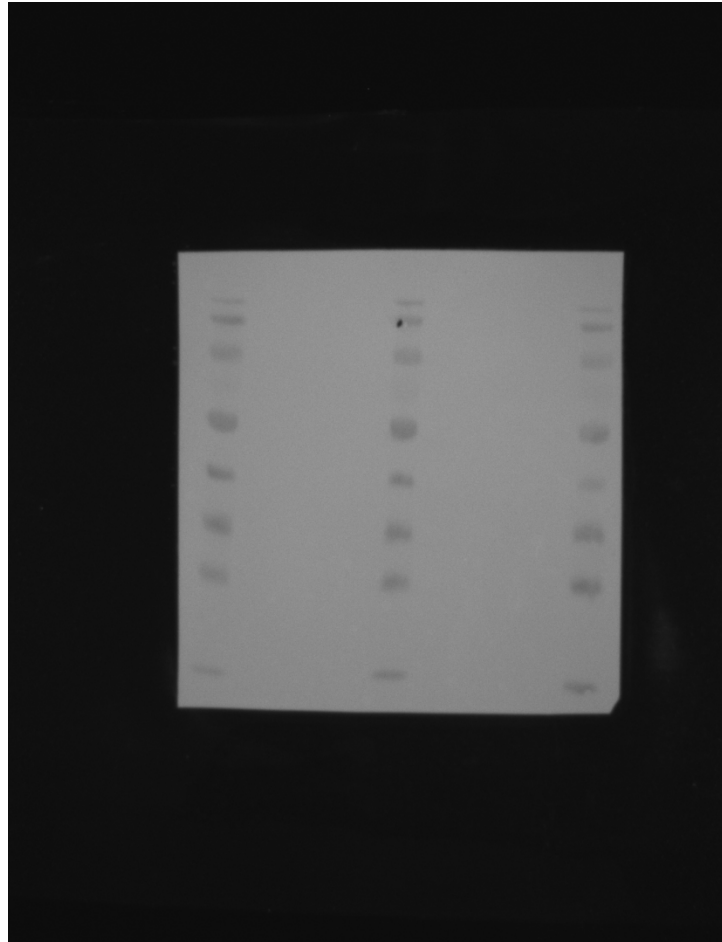

## Figure 11c: TNFRSF21 overexpression

Replicate 1:  $\beta$ -Actin

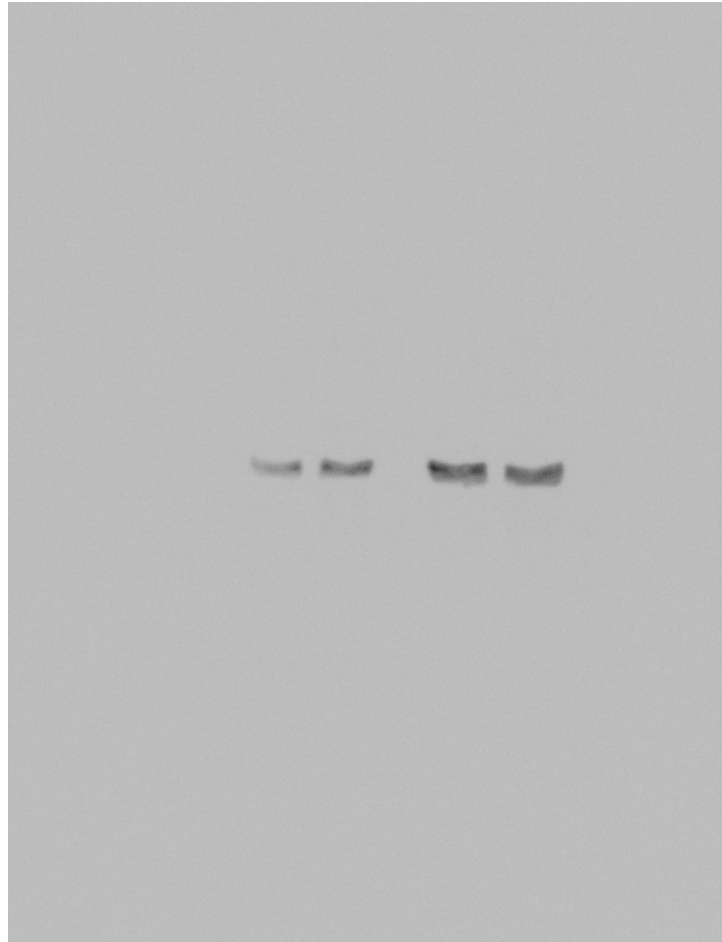

**From left to right:** empty vector control (30 $\mu$ g protein), TNFRSF21 overexpression (30 $\mu$ g protein), empty vector control (50 $\mu$ g protein), TNFRSF21 overexpression (50 $\mu$ g protein)



## Figure 11c: TNFRSF21 overexpression

Replicate 2: marker for TNFRSF21

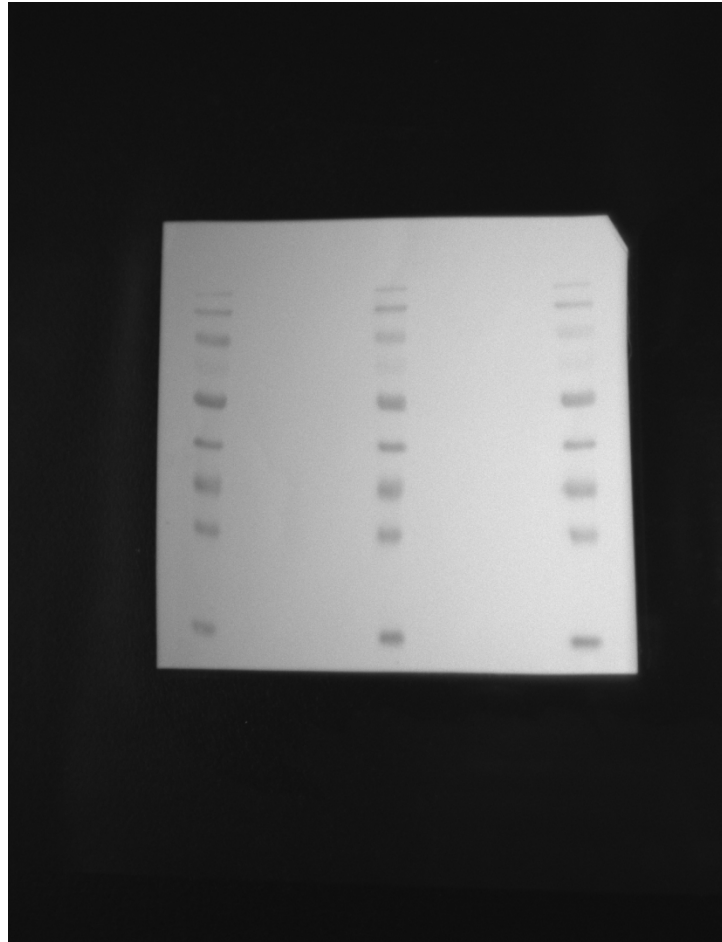

## Figure 11c: TNFRSF21 overexpression

Replicate 2: TNFRSF21

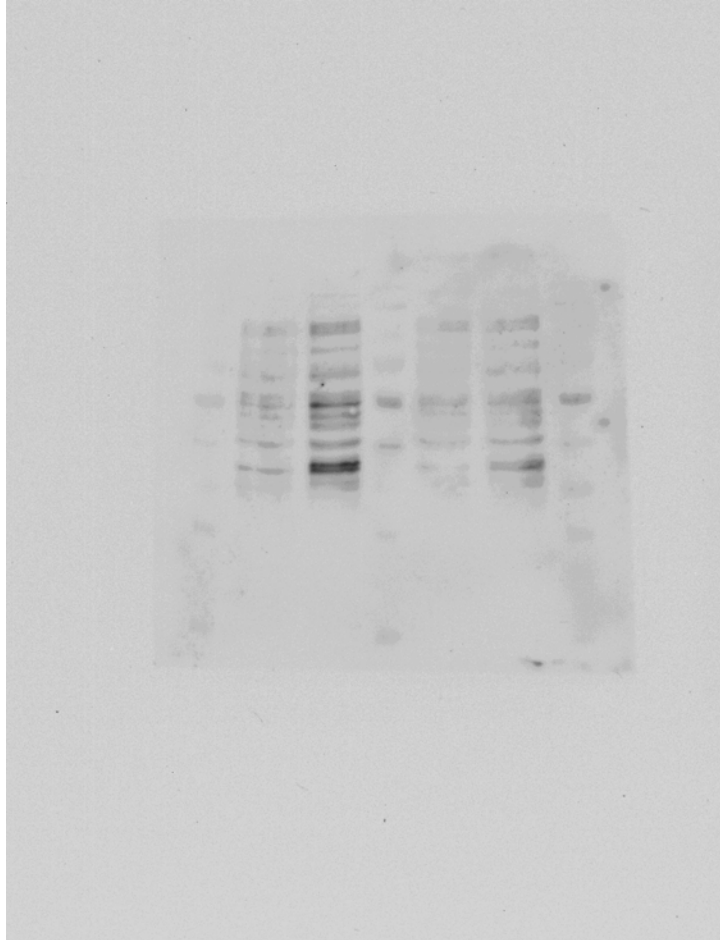

**From left to right:** empty vector control (replicate 1), TNFRSF21 overexpression (replicate 1), empty vector control (replicate 2), TNFRSF21 overexpression (replicate 2)

## Figure 11c: TNFRSF21 overexpression

Replicate 2: marker for  $\beta$ -Actin

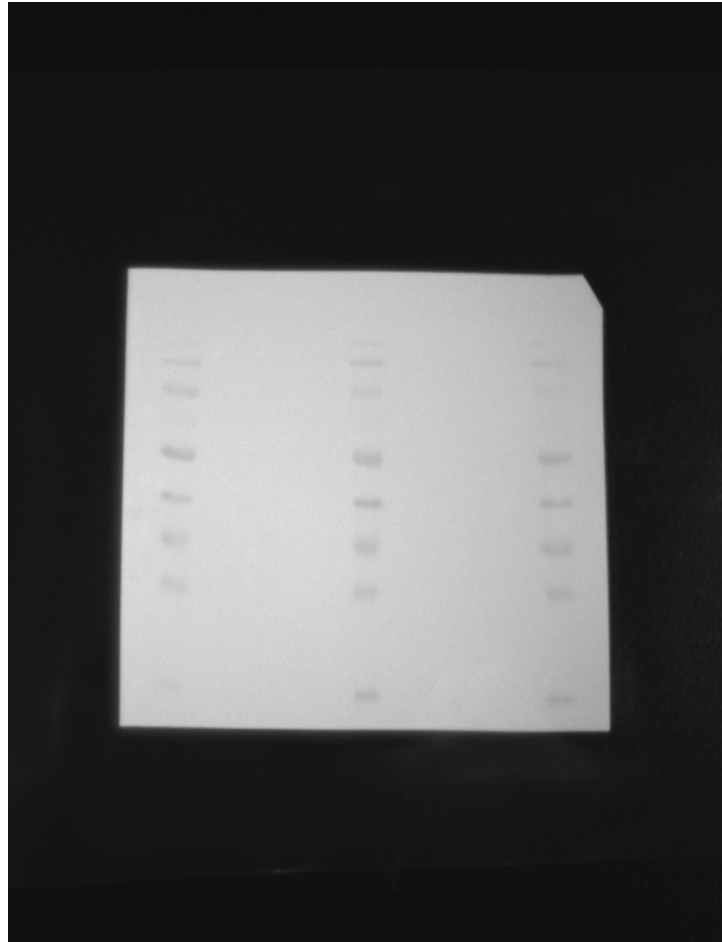

## Figure 11c: TNFRSF21 overexpression

Replicate 2:  $\beta$ -Actin

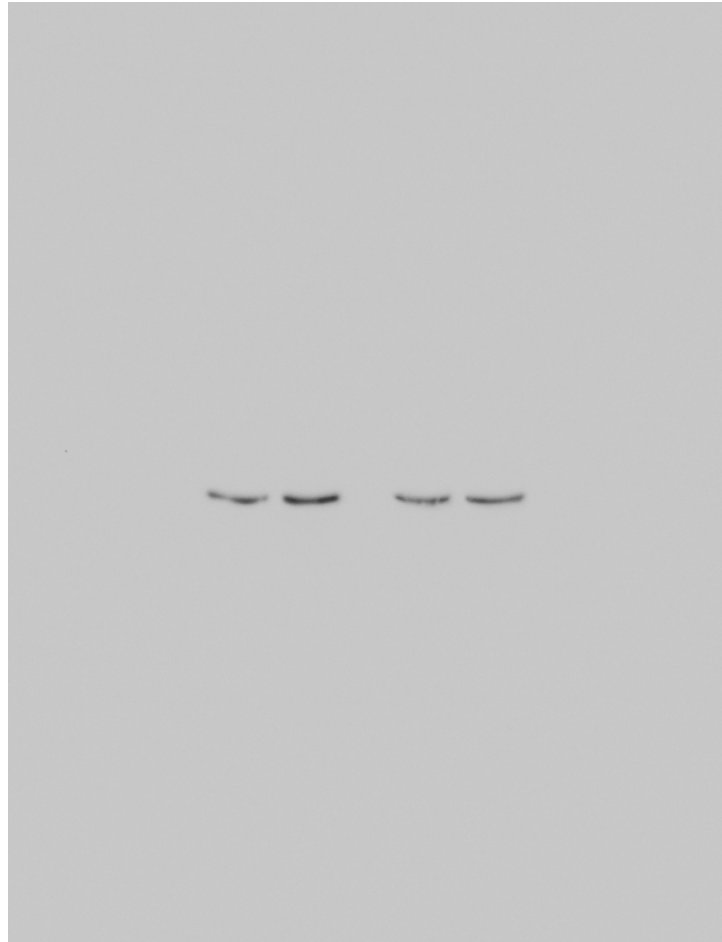

**From left to right:** empty vector control (replicate 1), TNFRSF21 overexpression (replicate 1), empty vector control (replicate 2), TNFRSF21 overexpression (replicate 2)

## Figure 11c: TNFRSF21 overexpression

Replicate 3: marker for TNFRSF21

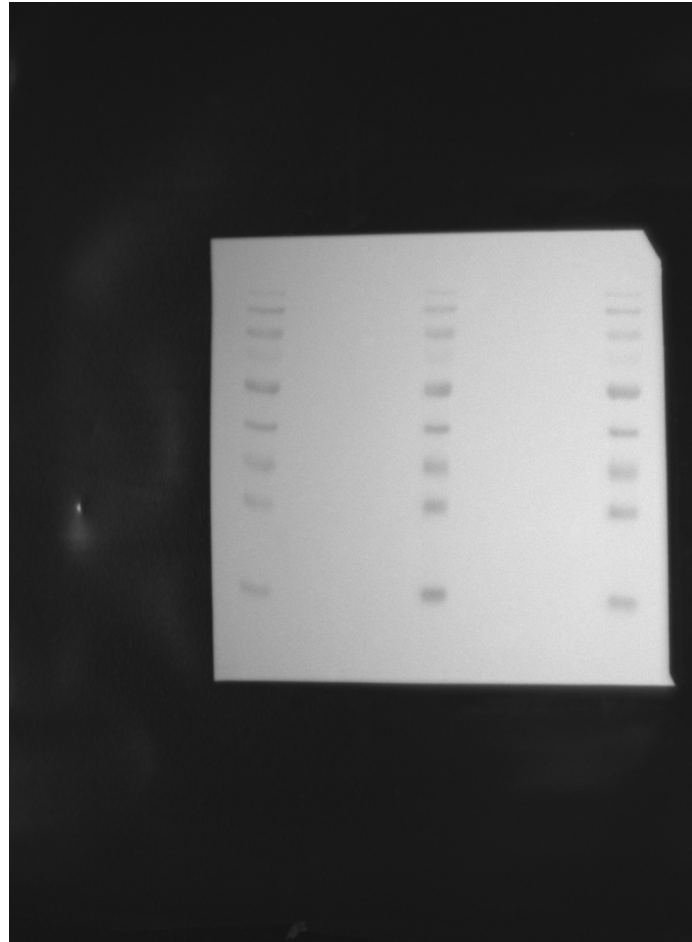

## Figure 11c: TNFRSF21 overexpression

Replicate 3: TNFRSF21

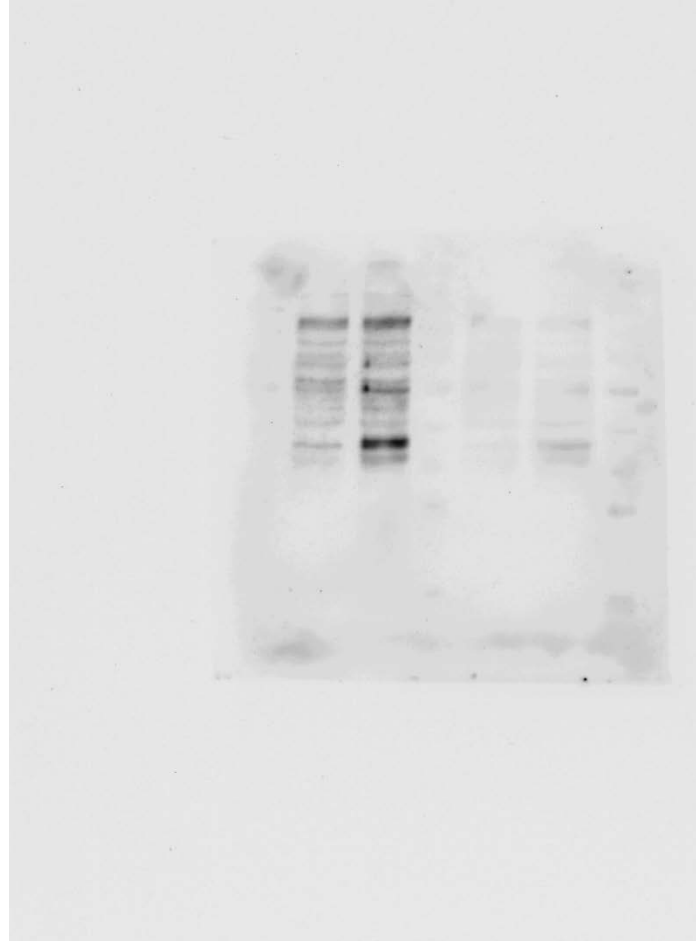

**From left to right:** empty vector control (replicate 1), TNFRSF21 overexpression (replicate 1), empty vector control (replicate 3), TNFRSF21 overexpression (replicate 3)

## Figure 11c: TNFRSF21 overexpression

Replicate 3: marker for  $\beta$ -Actin



## Figure 11c: TNFRSF21 overexpression

Replicate 3:  $\beta$ -Actin

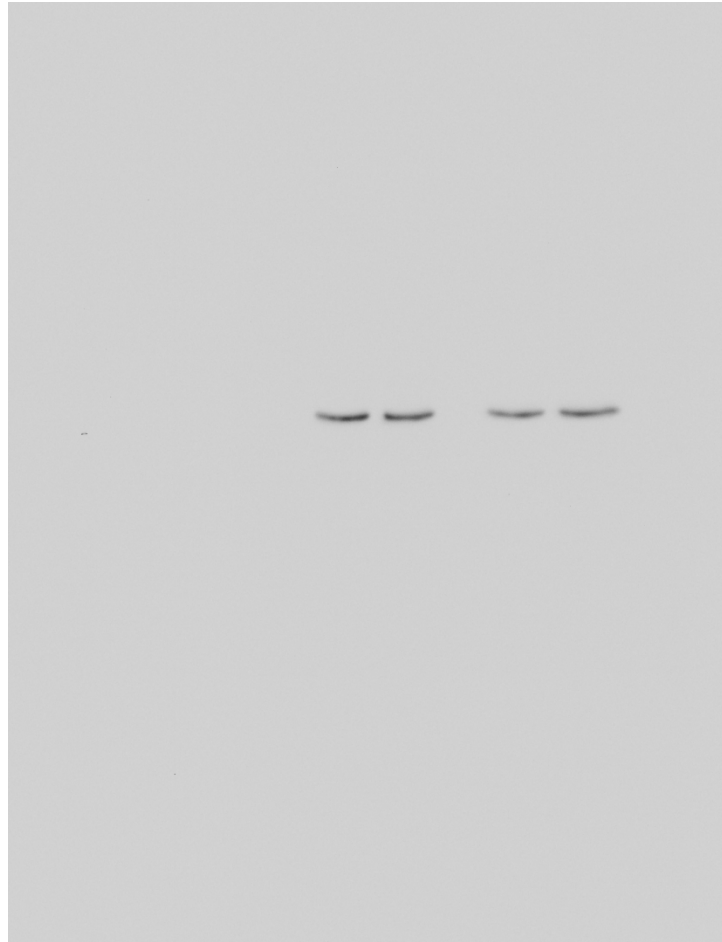

**From left to right:** empty vector control (replicate 1), TNFRSF21 overexpression (replicate 1), empty vector control (replicate 3), TNFRSF21 overexpression (replicate 3)



## Figure 11d: TNFRSF21 endogenous expression

Replicate 1: marker for TNFRSF21

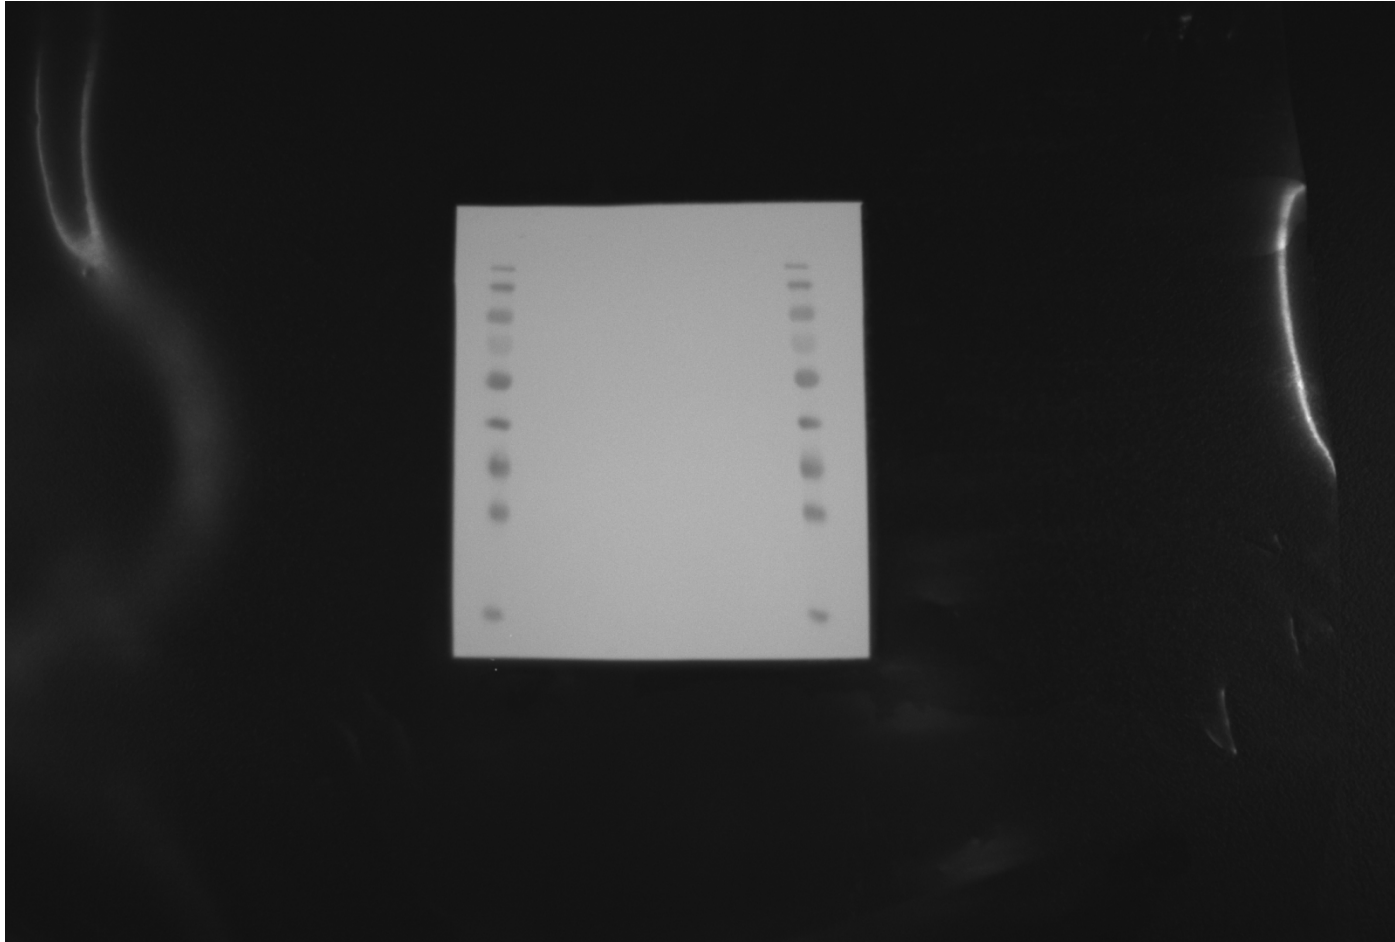

## Figure 11d: TNFRSF21 endogenous expression

Replicate 1: TNFRSF21

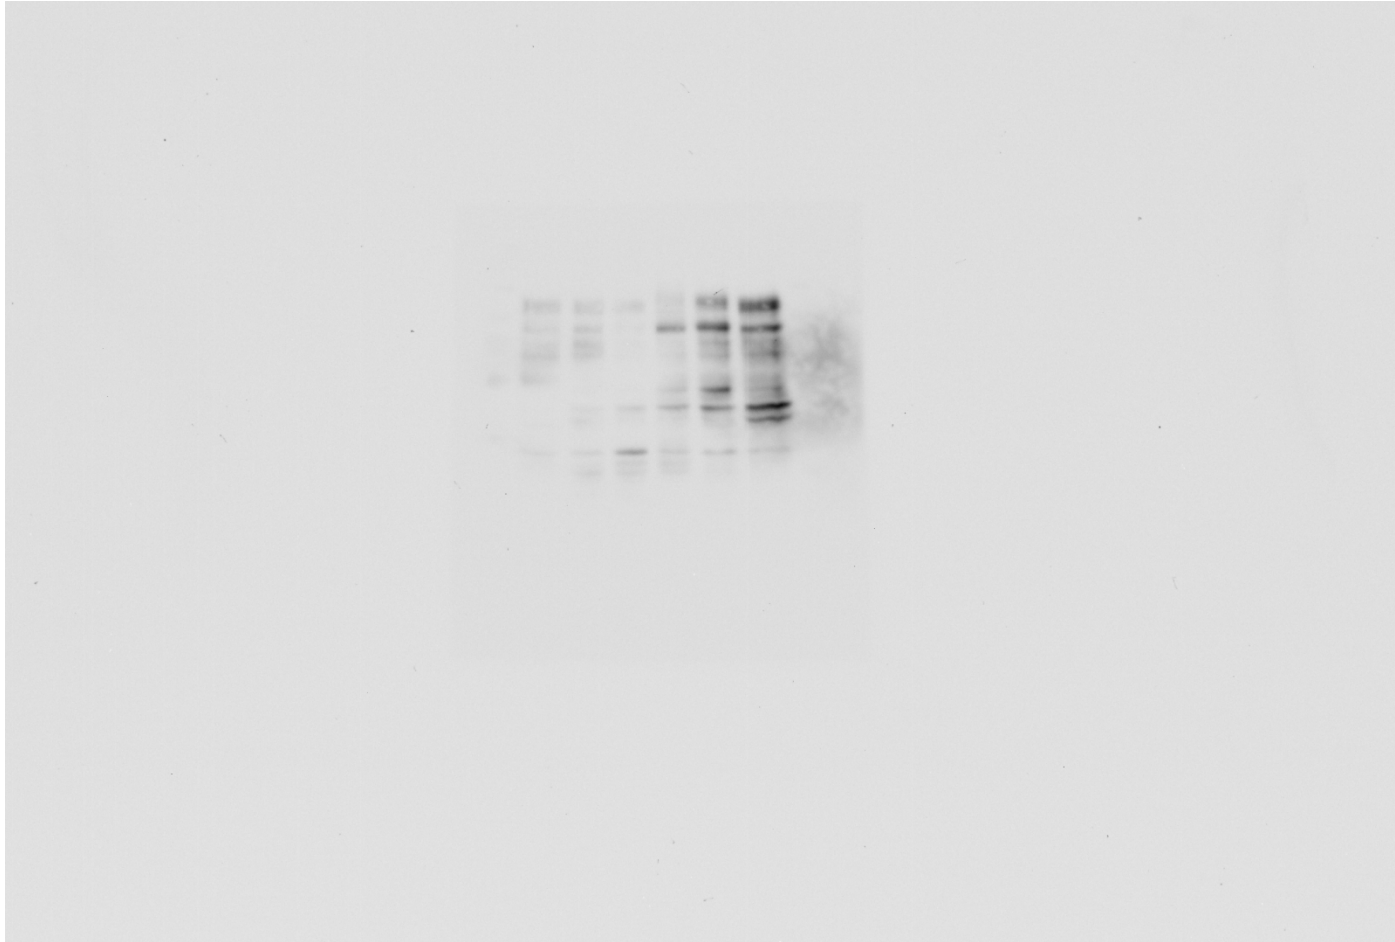

**From left to right:** NCI-H1792, NCI-H2085, NCI-H1573, NCI-H1648, NCI-H1993, Calu3

## Figure 11d: TNFRSF21 endogenous expression

Replicate 1: marker for  $\beta$ -Actin

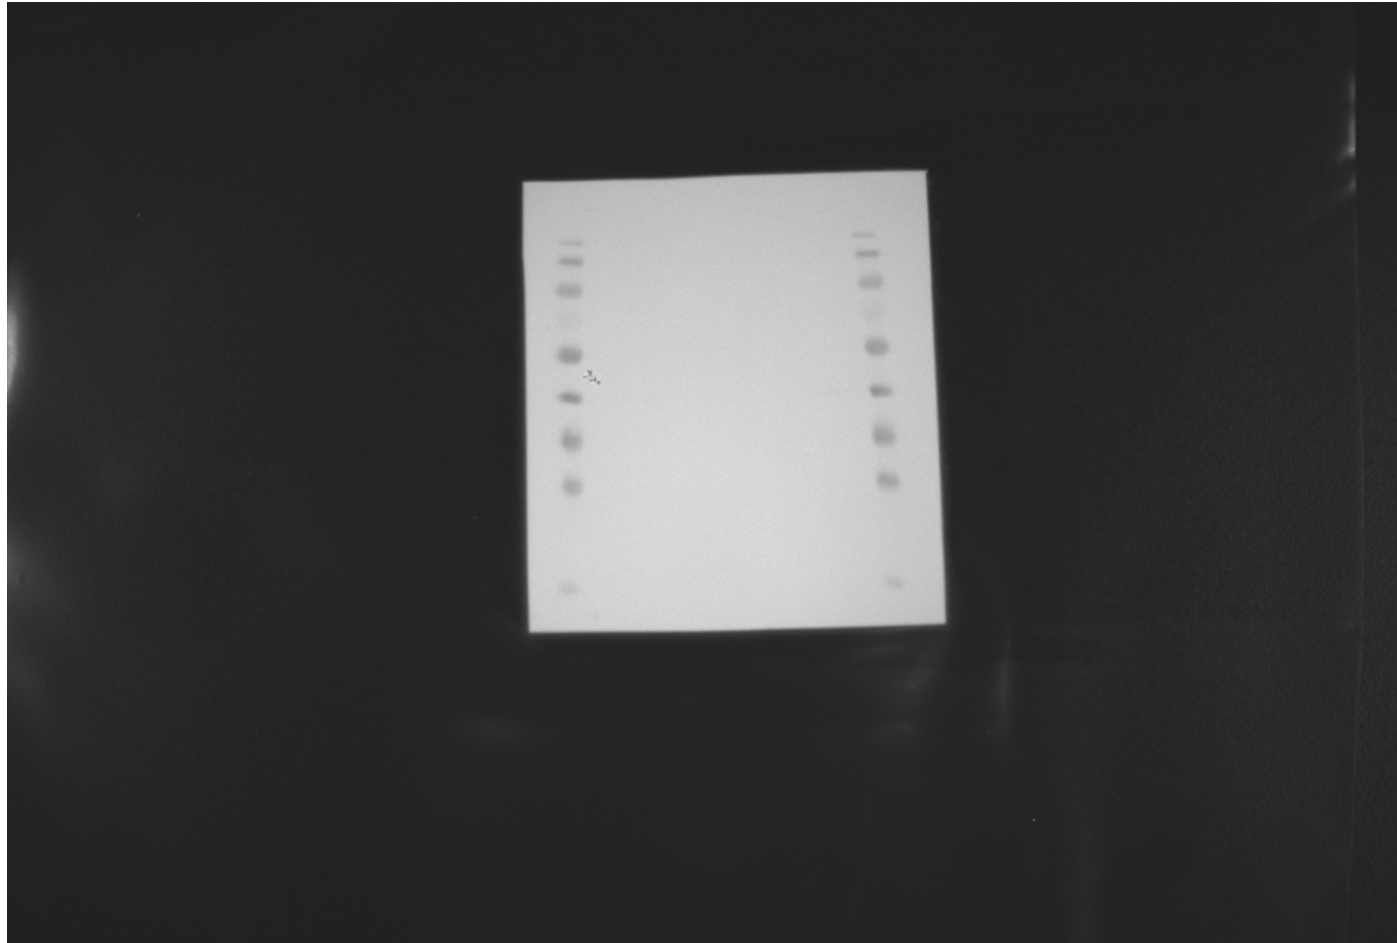

## Figure 11d: TNFRSF21 endogenous expression

Replicate 1:  $\beta$ -Actin

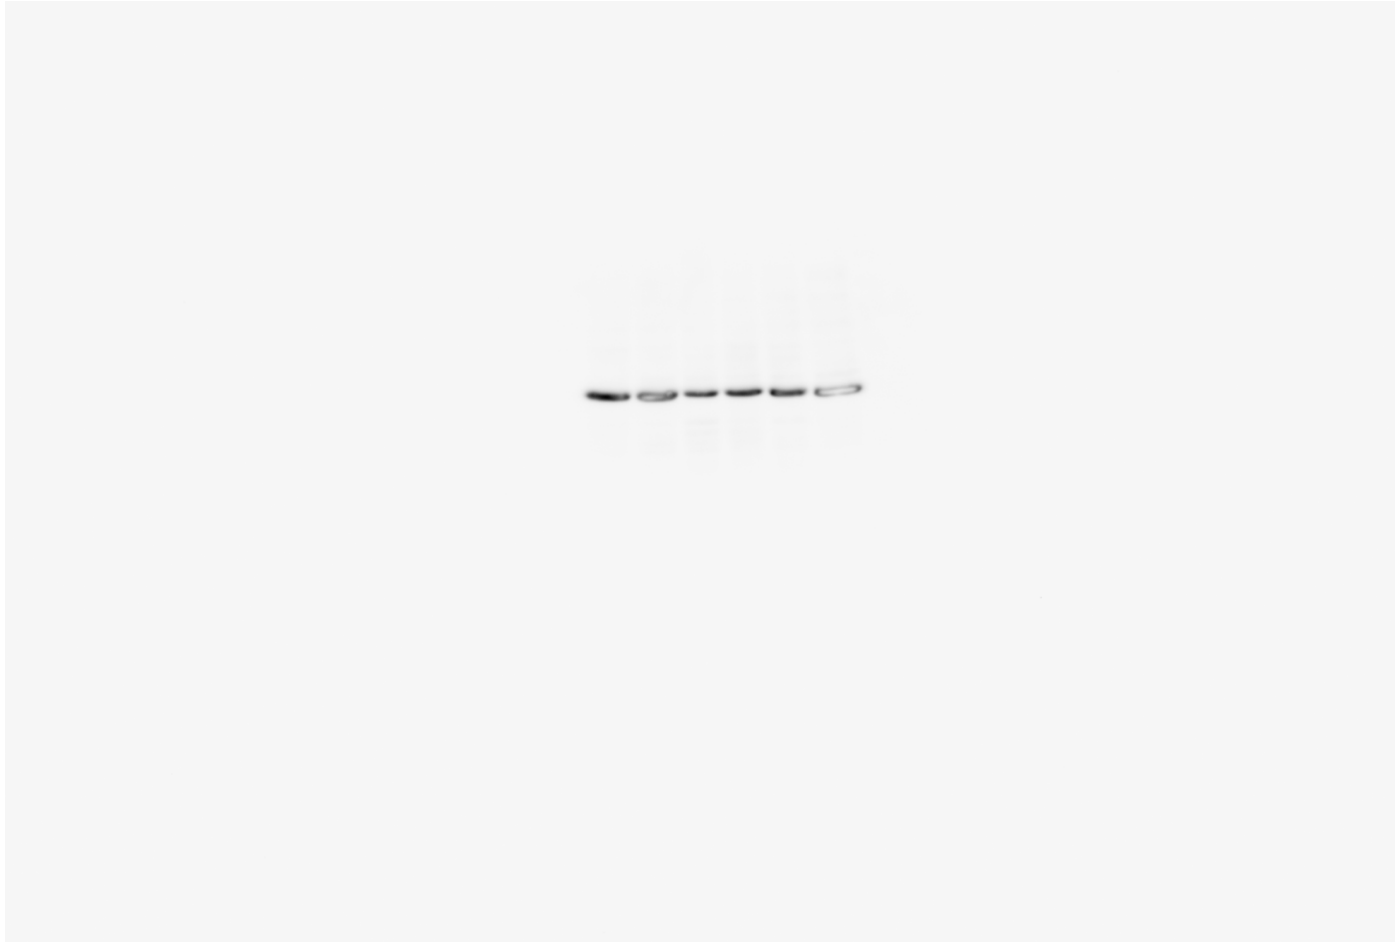

**From left to right:** NCI-H1792, NCI-H2085, NCI-H1573, NCI-H1648, NCI-H1993, Calu3

## Figure 11d: TNFRSF21 endogenous expression

Replicate 2: marker for TNFRSF21

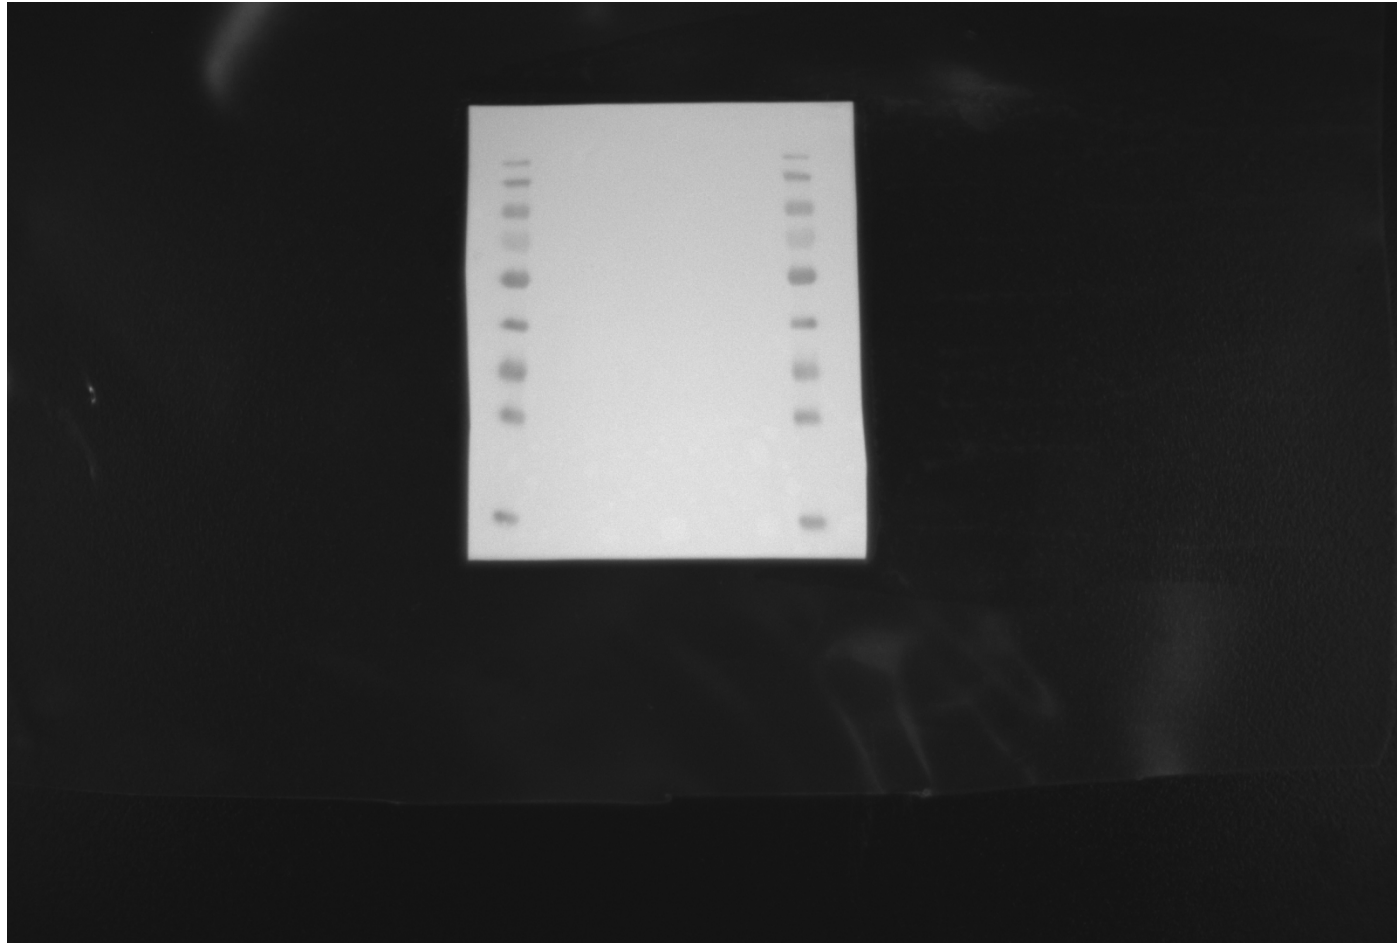

## Figure 11d: TNFRSF21 endogenous expression

Replicate 2: TNFRSF21

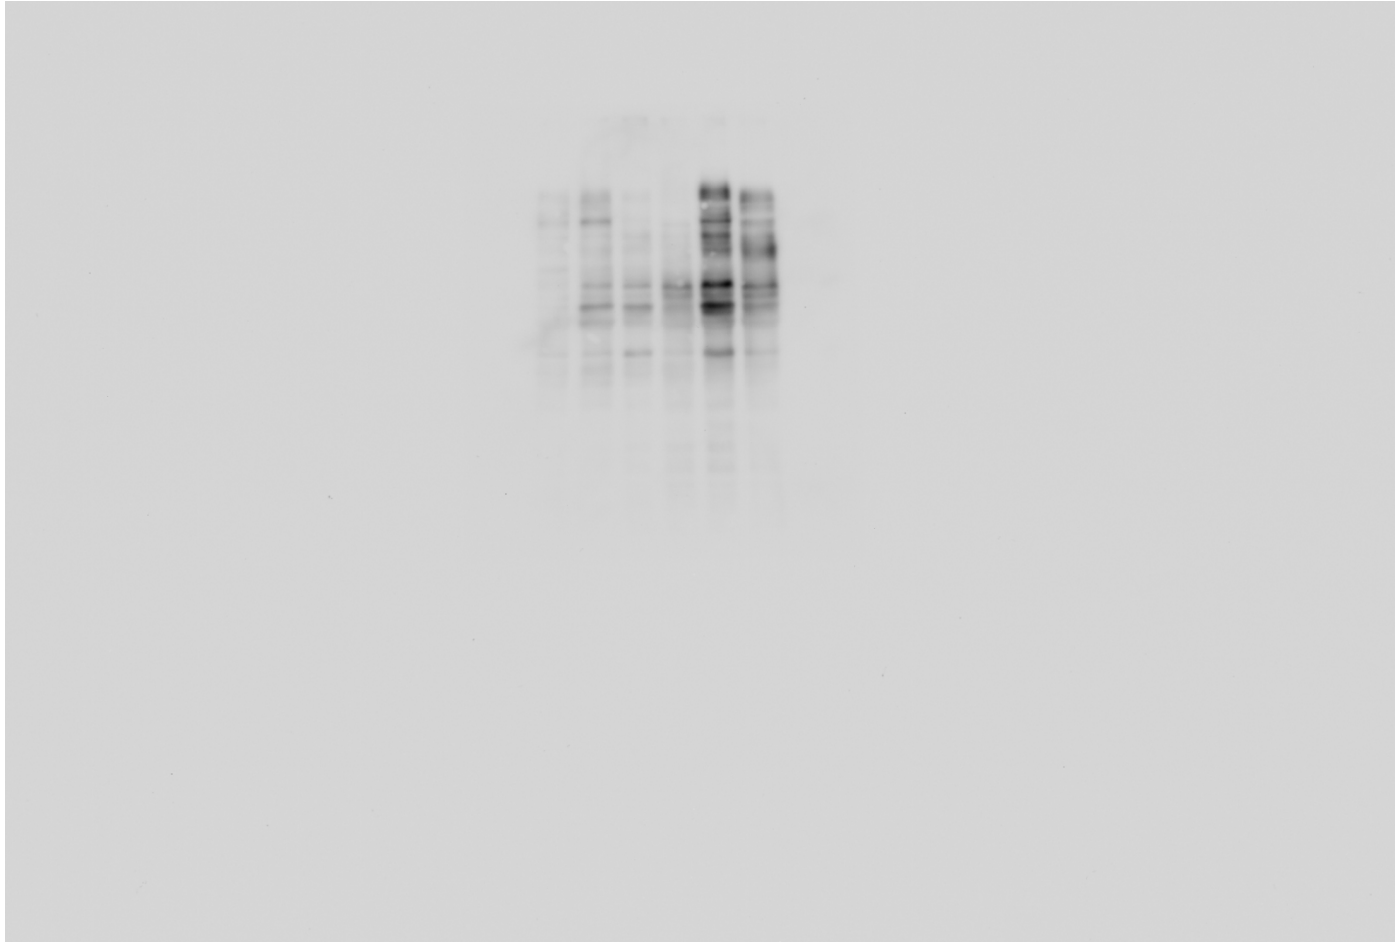

**From left to right:** NCI-H1792, NCI-H2085, NCI-H1573, NCI-H1648, NCI-H1993, Calu3

## Figure 11d: TNFRSF21 endogenous expression

Replicate 2: marker for  $\beta$ -Actin

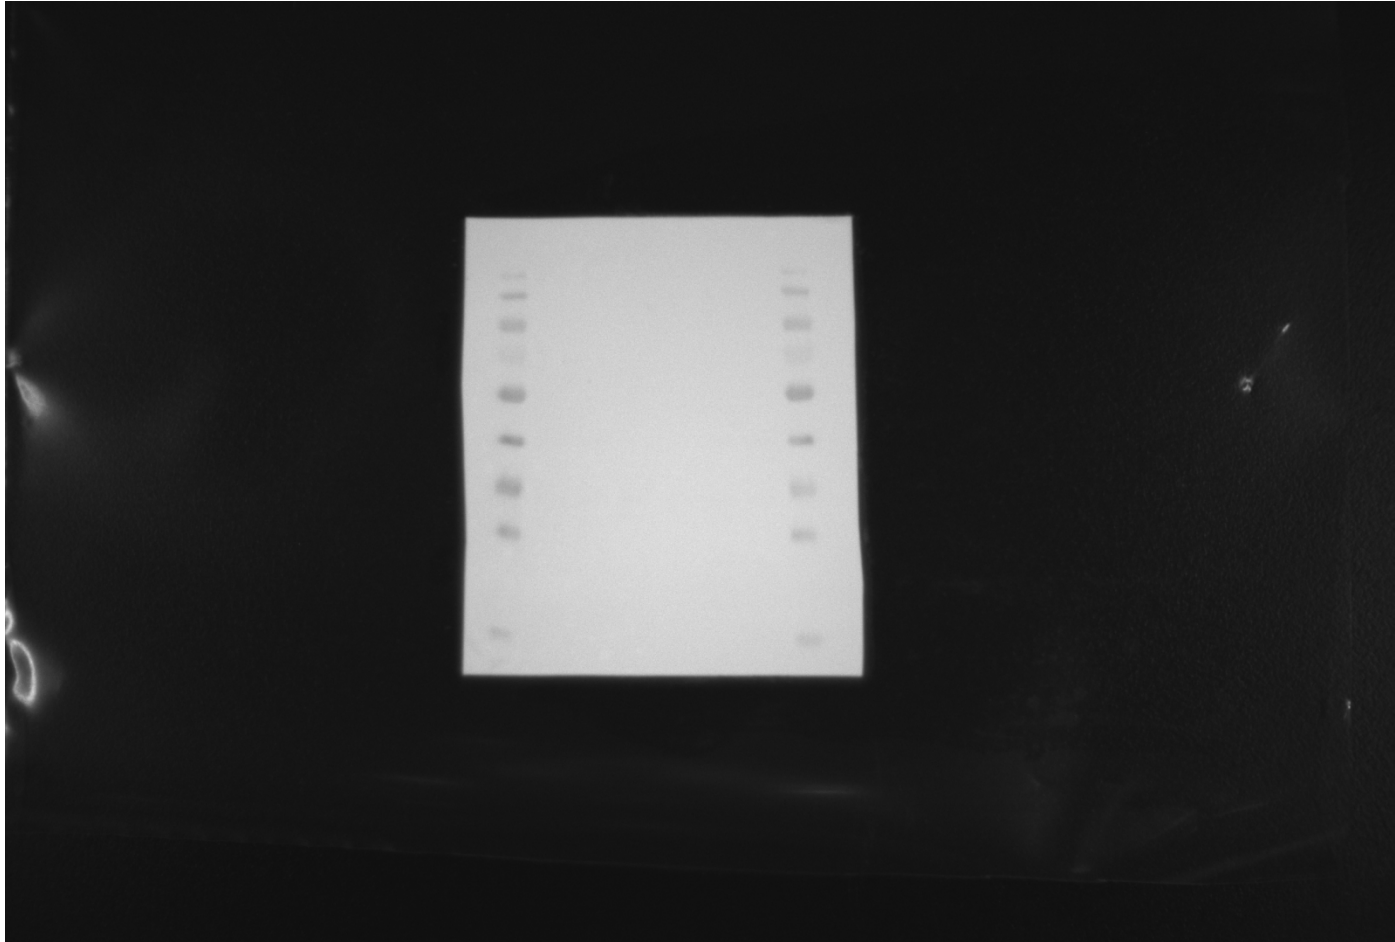

## Figure 11d: TNFRSF21 endogenous expression

Replicate 2:  $\beta$ -Actin

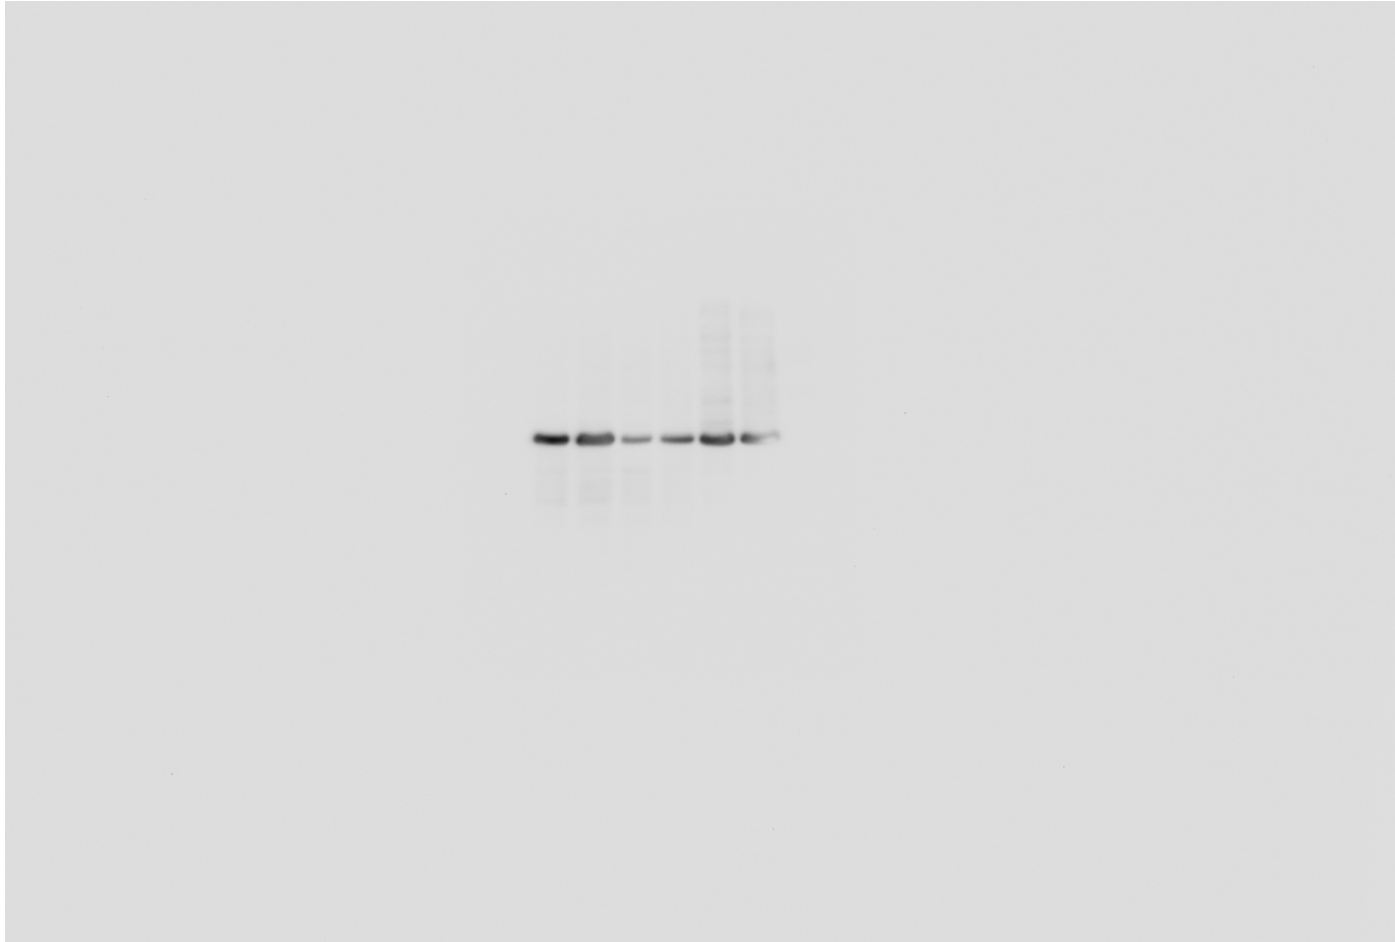

**From left to right:** NCI-H1792, NCI-H2085, NCI-H1573, NCI-H1648, NCI-H1993, Calu3



## Figure 11d: TNFRSF21 endogenous expression

Replicate 3: marker for TNFRSF21

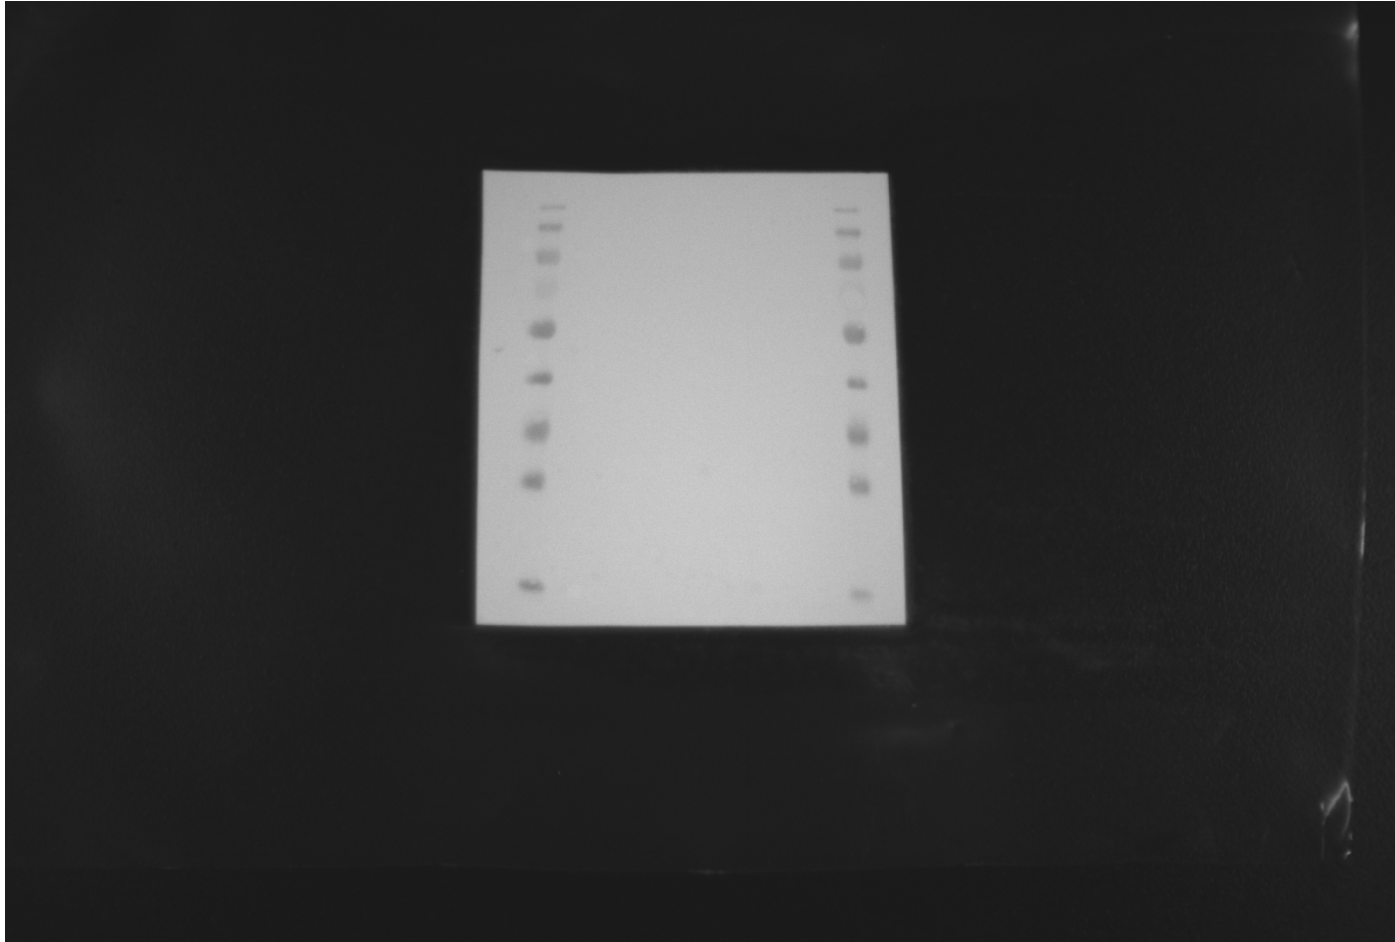

## Figure 11d: TNFRSF21 endogenous expression

Replicate 3: TNFRSF21

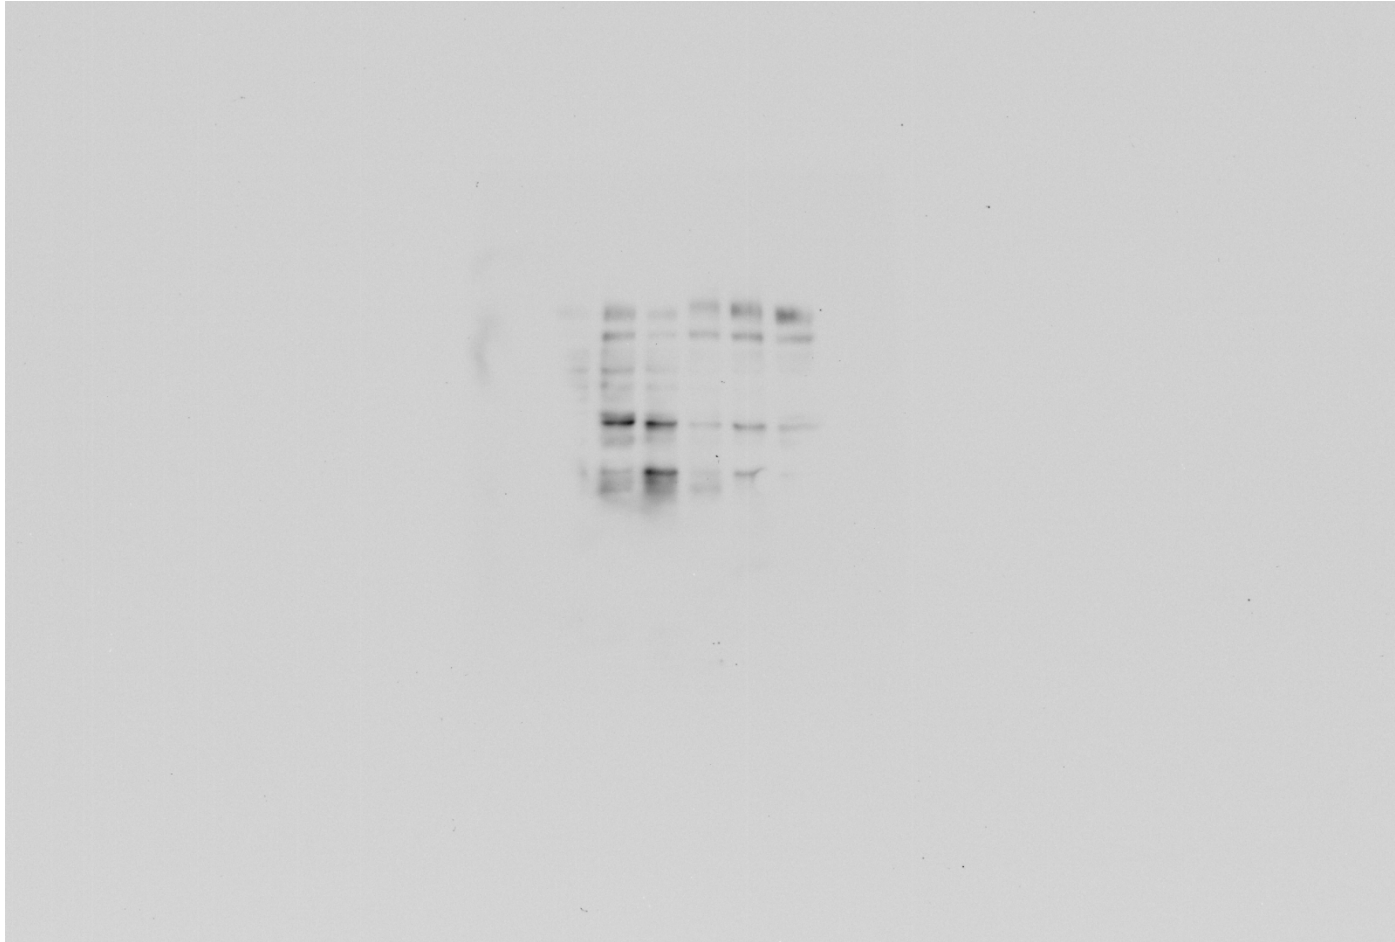

**From left to right:** NCI-H1792, NCI-H2085, NCI-H1573, NCI-H1648, NCI-H1993, Calu3

## Figure 11d: TNFRSF21 endogenous expression

Replicate 3: marker for  $\beta$ -Actin

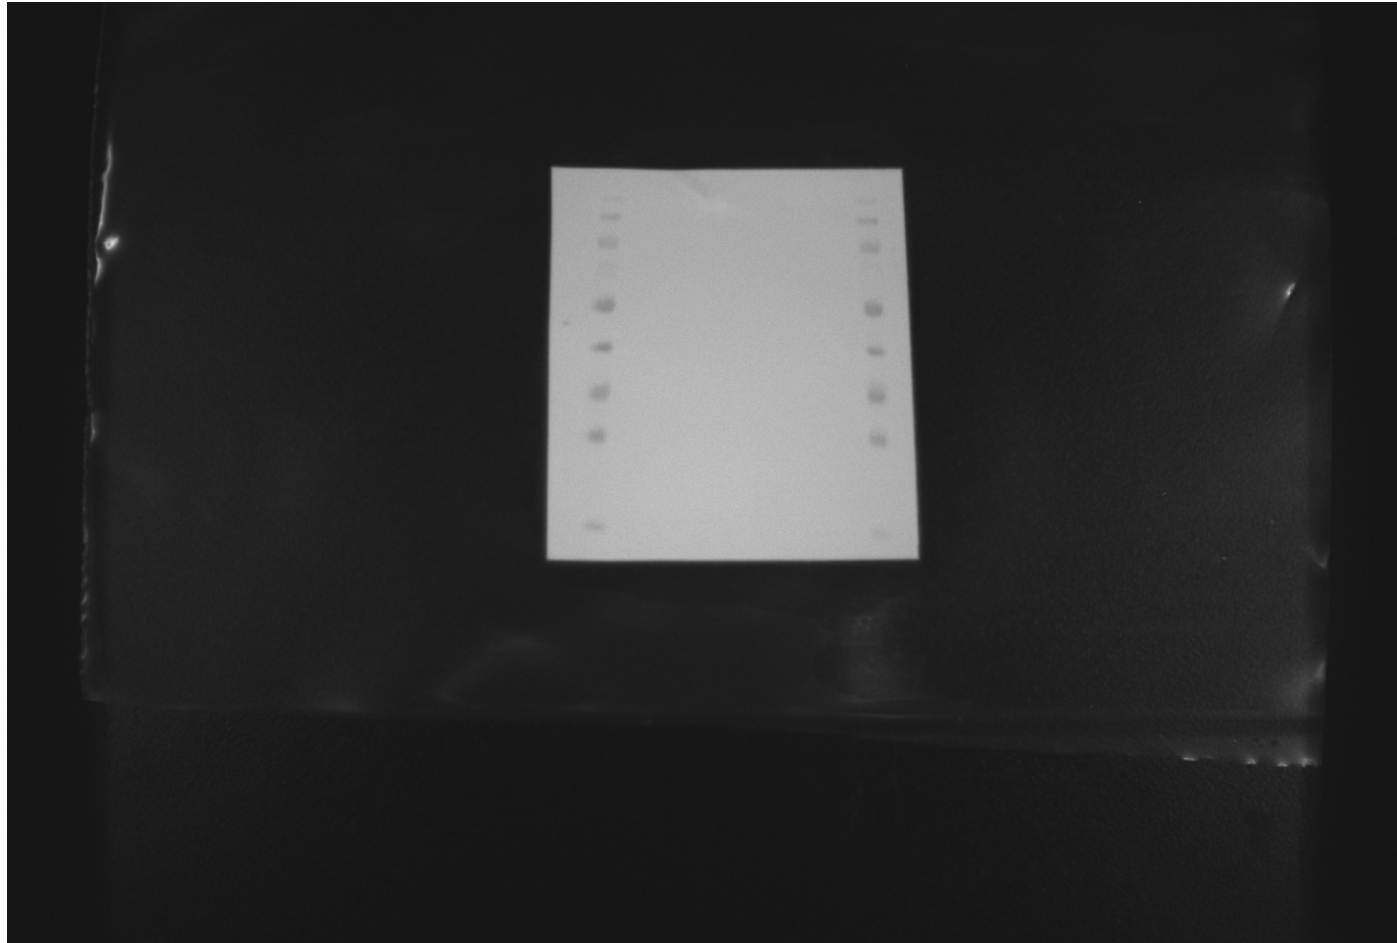

## Figure 11d: TNFRSF21 endogenous expression

Replicate 3:  $\beta$ -Actin

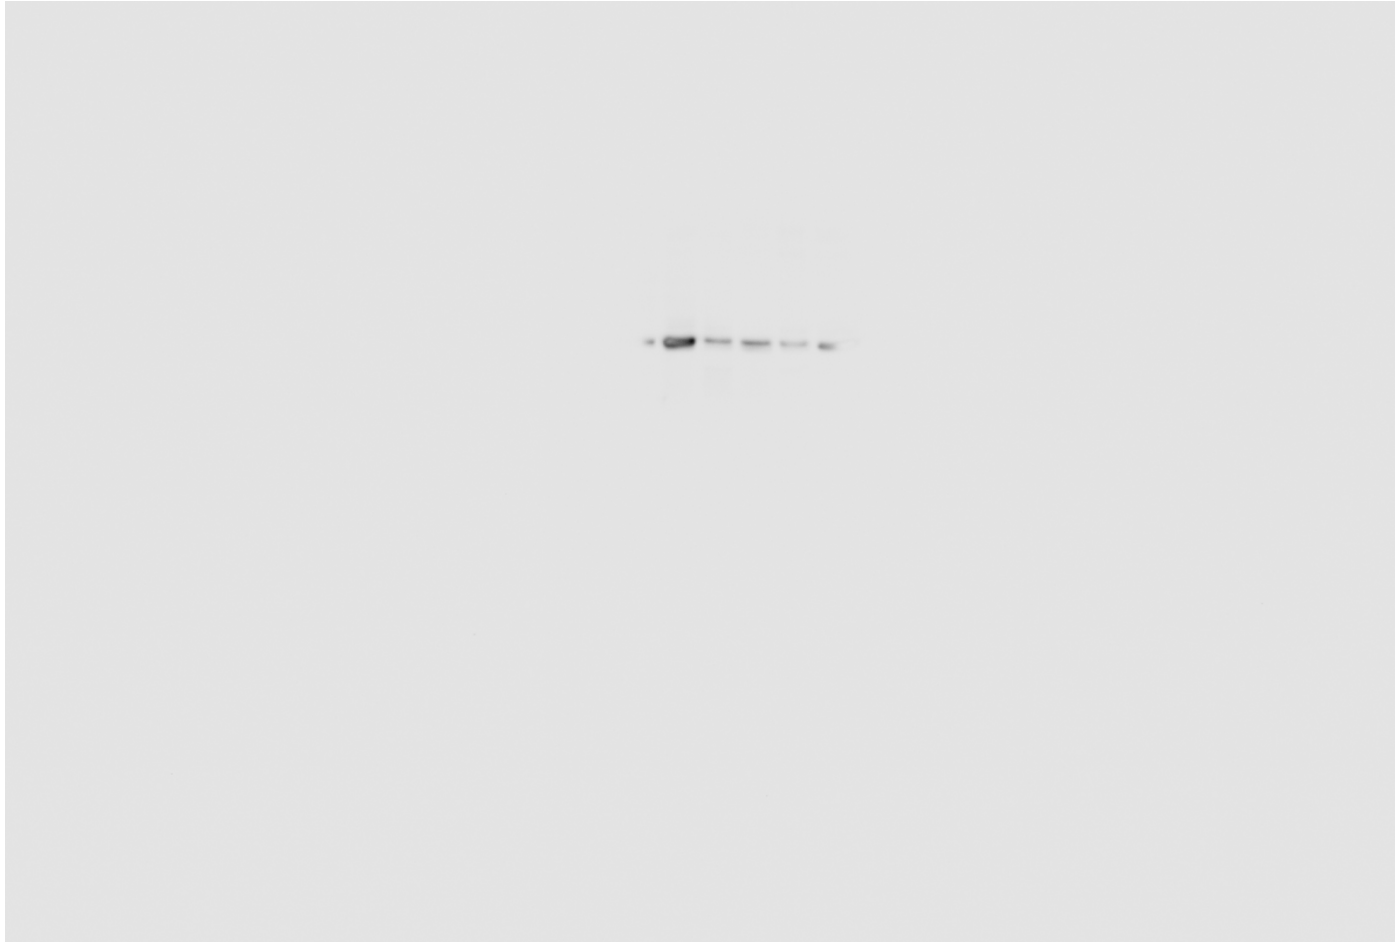

**From left to right:** NCI-H1792, NCI-H2085, NCI-H1573, NCI-H1648, NCI-H1993, Calu3
