# Supplementary material for: The Circular RNA Landscape of Non-Small Cell Lung Cancer Cells
Source: MDPI journal article supplement (doi:10.3390/cancers12051091), 2020-04-28
Supplement: s1 [file s1]

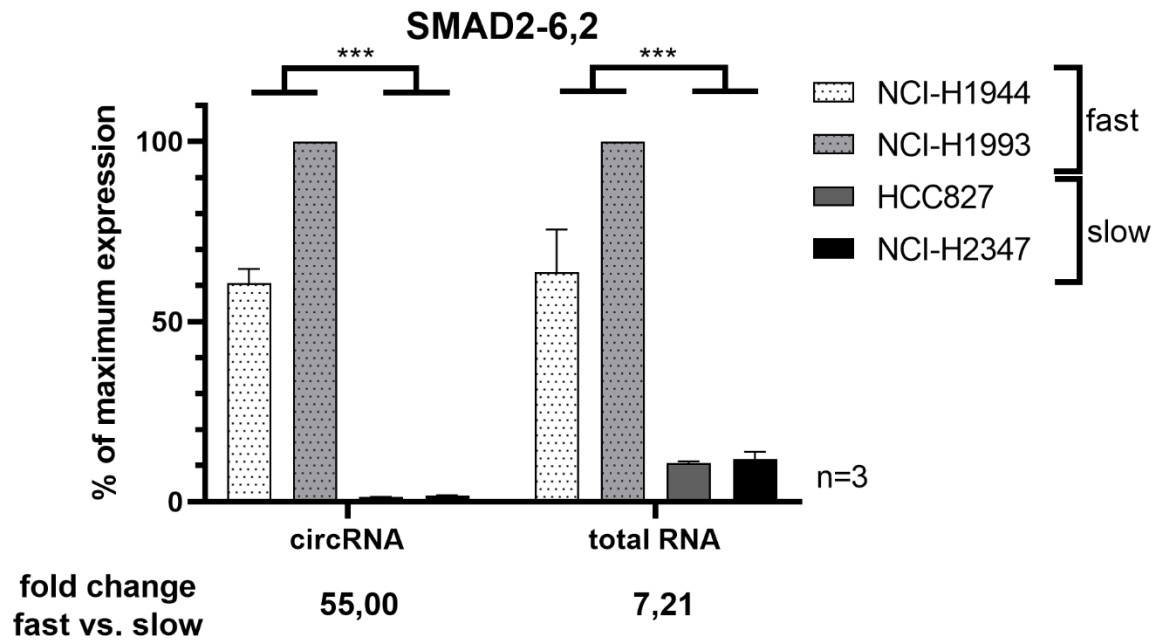

**Supplementary Figure 2.** Validation of proliferation-correlated circSMAD2-6,2 in fast vs. slowly proliferating cell lines with RT-qPCR. The first two cell lines (NCI-H1944, NCI-H1993) were fast proliferating ( $\geq 5$ -fold increase in cell count in 72h), the last two cell lines (HCC827, NCI-H2347) were slowly proliferating ( $\leq 3$ -fold cell count increase in 72h). Expression levels of circSMAD2-6,2 and total SMAD2-6,2 are depicted as % of maximum expression level (in NCI-H1993). T-test: not significant (n.s.), p-value $<0,05$  (\*), p-value $<0,01$  (\*\*), p-value $<0,001$  (\*\*\*). Below the graph, the fold change of average relative expression level between the groups is shown.
