# Supplementary material for: The Circular RNA Landscape of Non-Small Cell Lung Cancer Cells
Source: Cancers (Basel). 2020 Apr 28;12(5):1091. doi: 10.3390/cancers12051091 (PMC7281449; doi:10.3390/cancers12051091)
Supplement: Supplementary file 1 [file cancers-12-01091-s001.zip]

Archive with 9 entries (9 files):
- Suppl Figure S1.pdf
- Suppl Figure S2.pdf
- Suppl Table S1 Cell Lines.xlsx
- Suppl Table S2 circRNA data gene level.xlsx
- Suppl Table S3 circRNA data backsplice level.xlsx
- Suppl Table S4 Differentially expressed circRNAs.xlsx
- Suppl Table S5 Primers.xlsx
- Suppl Western Blots Densitometry.xlsx
- Suppl Western Blots.pdf
