# Supplementary material for: The Circular RNA Landscape of Non-Small Cell Lung Cancer Cells
Source: Cancers (Basel). 2020 Apr 28;12(5):1091. doi: 10.3390/cancers12051091 (PMC7281449; doi:10.3390/cancers12051091)
Supplement: Supplementary file 1 [file cancers-12-01091-s001.zip › Suppl Table S1 Cell Lines.xlsx]

## Sheet: Table S1
Cell Line	ATCC name	Subtype	Source	Derived from Metastasis	Stage	Smoker	Packyears	Therapy	Age [years]	Sex	Ethnicity	EGFR	TP53	KRAS	BRAF	Proliferation rate 72h	Proliferation (category)
A427	HTB-53	Lung Adenocarcinoma	ATCC							Male	Caucasian	WT	WT	p.G12D	p.P341P	3.68	medium
A549	CCL-185	Lung Adenocarcinoma	FL3C / ATCC						58	Male	Caucasian	WT	WT	p.G12S	WT	5.66	fast
Calu-3	HTB-55	Lung Adenocarcinoma	ATCC	Pleural Effusion				Cytoxan, Bleomycin, Adriamycin	25	Male	Caucasian	WT	p.M237I + p.M144I	WT	WT	1.83	slow
HCC2935	CRL-2869	Lung Adenocarcinoma	ATCC	Pleural Effusion		Non-Smoker			39	Male	Caucasian	NA	NA	NA	NA	2.77	slow
HCC4006	CRL-2871	Lung Adenocarcinoma	ATCC	Pleural Effusion					>50	Male	Caucasian	NA	NA	NA	NA	3.18	medium
HCC827	CRL-2868	Lung Adenocarcinoma	ATCC						39	Female	Caucasian	p.E746_A750delELREA	p.V218delV + p.V125delV	WT	WT	1.45	slow
NCI-H1373	CRL-5866	Lung Adenocarcinoma	ATCC		3A	Smoker	30	radiation therapy & chemotherapy	56	Male	Black	NA	NA	NA	NA	3.38	medium
NCI-H1395	CRL-5868	Lung Adenocarcinoma	ATCC		2	Smoker	15		55	Female	Caucasian	NA	NA	NA	NA	2.01	slow
NCI-H1435	CRL-5870	Lung Adenocarcinoma	ATCC			Non-Smoker			35	Female		WT	p.C141W + p.C9W + p.C48W	WT	WT
NCI-H1437	CRL-5872	Lung Adenocarcinoma	ATCC	Pleural Effusion	1	Smoker	70		60	Male	Caucasian	WT	p.R267P	WT	WT	3.45	medium
NCI-H1563	CRL-5875	Lung Adenocarcinoma	ATCC			Non-Smoker				Male		WT	WT	WT	WT	2.68	slow
NCI-H1568	CRL-5876	Lung Adenocarcinoma	ATCC	Lymph Node		Smoker	60		48	Female	Caucasian	p.D1127N	p.H179R + p.H47R + p.H86R	WT	WT	1.73	slow
NCI-H1573	CRL-5877	Lung Adenocarcinoma	ATCC	Soft Tissue	4	Smoker	15	radiation therapy	35	Female	Caucasian	WT	p.R248L + p.R155L	p.G12A	WT	5.79	fast
NCI-H1623	CRL-5881	Lung Adenocarcinoma	ATCC	Lymph Node	3B	Smoker			58	Male	Caucasian	WT	p.R273L + p.P36S + p.P36L	WT	WT	4.58	medium
NCI-H1648	CRL-5882	Lung Adenocarcinoma	ATCC	Lymph Node	3A	Smoker			39	Male	Black	WT	p.L35fs*8	WT	WT
NCI-H1650	CRL-5883	Lung Adenocarcinoma	ATCC	Pleural Effusion	3B	Smoker			27	Male	Caucasian	p.E746_A750delELREA	c.673-2A>G + c.394-2A>G	WT	WT	3.25	medium
NCI-H1651	CRL-5884	Lung Adenocarcinoma	ATCC			Non-Smoker			71	Male		WT	p.C176Y + p.C44Y + p.C83Y	WT	p.E375D	3.28	medium
NCI-H1666	CRL-5885	Lung Adenocarcinoma	ATCC	Pleural Effusion		Non-Smoker		radiation therapy	50	Female	Caucasian	WT	WT	WT	p.G466V	2.23	slow
NCI-H1693	CRL-5887	Lung Adenocarcinoma	ATCC		3B	Smoker	80		55	Female	Caucasian	WT	c.993+1G>T	WT	WT	2.57	slow
NCI-H1734	CRL-5891	Lung Adenocarcinoma	ATCC			Non-Smoker			56	Female		WT	p.R273L	p.G13C	WT	1.58	slow
NCI-H1755	CRL-5892	Lung Adenocarcinoma	ATCC	Liver	4	Smoker	60		65	Female	Caucasian	WT	p.C242F + p.C149F	WT	p.G469A	1.69	slow
NCI-H1781	CRL-5894	Lung Adenocarcinoma	ATCC	Pleural Effusion	3B	Smoker		radiation therapy & chemotherapy	66	Female	Caucasian	WT	p.V157F + p.V25F + p.V64F	WT	WT	2.54	slow
NCI-H1792	CRL-5895	Lung Adenocarcinoma	ATCC	Pleural Effusion	4	Smoker			50	Male	Caucasian	WT	c.672+1G>A	p.G12C	WT	2.41	slow
NCI-H1793	CRL-5896	Lung Adenocarcinoma	ATCC			Non-Smoker			52	Female		p.C311F	p.R273H + p.R209* + p.R77* + p.R116*	WT	WT	2.37	slow
NCI-H1838	CRL-5899	Lung Adenocarcinoma	ATCC			Non-Smoker				Female		WT	p.R273L	WT	WT	2.25	slow
NCI-H1944	CRL-5907	Lung Adenocarcinoma	ATCC	Soft Tissue	3B	Smoker		radiation therapy	62	Female	Caucasian	WT	WT	p.G13D	WT	7.17	fast
NCI-H1975	CRL-5908	Lung Adenocarcinoma	ATCC			Non-Smoker				Female		p.L858R + p.T790M	p.R273H	WT	WT	3.49	medium
NCI-H1993	CRL-5909	Lung Adenocarcinoma	B150	Lymph Node	3A	Smoker	30		47	Female	Caucasian	WT	p.C242W + p.C149W	WT	WT	9.53	fast
NCI-H2009	CRL-5911	Lung Adenocarcinoma	ATCC	Lymph Node	4	Smoker	30	radiation therapy & chemotherapy	68	Female	Caucasian	WT	p.R273L	p.G12A	WT	5.9	fast
NCI-H2023	CRL-5912	Lung Adenocarcinoma	ATCC		3A	Non-Smoker			26	Male	Caucasian	WT	p.S240R + p.S147R	WT	WT	4.22	medium
NCI-H2030	CRL-5914	Lung Adenocarcinoma	ATCC			Non-Smoker				Male		WT	p.G262V	p.G12C	WT	4.77	medium
NCI-H2073	CRL-5918	Lung Adenocarcinoma	ATCC		3A	Smoker	30		47	Female	Caucasian	NA	NA	NA	NA	2.66	slow
NCI-H2085	CRL-5921	Lung Adenocarcinoma	ATCC						45	Male		WT	p.Y220C + p.Y127C	WT	WT	2.53	slow
NCI-H2087	CRL-5922	Lung Adenocarcinoma	ATCC	Lymph Node	1	Smoker	60					WT	p.V157F + p.V25F + p.V64F	WT	p.L597V
NCI-H2122	CRL-5985	Lung Adenocarcinoma	ATCC	Pleural Effusion	4	Smoker	30		46	Female	Caucasian	WT	p.Q16L + p.C176F + p.C44F + p.C83F	p.G12C	WT	3.02	medium
NCI-H2126	CCL-256	Lung Adenocarcinoma	ATCC	Pleural Effusion					65	Male	Caucasian	WT	p.E62*	WT	WT	3.34	medium
NCI-H2228	CRL-5935	Lung Adenocarcinoma	ATCC			Non-Smoker				Female		WT	p.Q331*	WT	WT	2.82	slow
NCI-H2291	CRL-5939	Lung Adenocarcinoma	ATCC	Lymph Node		Non-Smoker				Male		p.V592F	p.G154V + p.G22V + p.G61V	p.G12V + p.G12C	WT	2.39	slow
NCI-H23	CRL-5800	Lung Adenocarcinoma	ATCC					prior to therapy	51	Male	Black	WT	p.M246I + p.M153I	p.G12C	WT	3.39	medium
NCI-H2342	CRL-5941	Lung Adenocarcinoma	ATCC		3A	Non-Smoker			55	Male	Caucasian	WT	p.Y220C + p.Y127C	WT	WT
NCI-H2347	CRL-5942	Lung Adenocarcinoma	ATCC		1	Non-Smoker			54	Female	Caucasian	WT	p.T125T	p.L19F	WT	1.2	slow
NCI-H2405	CRL-5944	Lung Adenocarcinoma	ATCC		4	Smoker	75		47	Male	Caucasian	WT	p.R273H	WT	p.L485_P490>Y
NCI-H3122		Lung Adenocarcinoma	FL3C / Manel Esteller									WT	p.E285V	WT	WT	4.68	medium
NCI-H441	HTB-174	Lung Adenocarcinoma	ATCC	(Pericardial Fluid)						Male		p.V904V	p.R158L + p.R26L + p.R65L	p.G12V	WT	4.48	medium
NCI-H522	CRL-5810	Lung Adenocarcinoma	ATCC		2	Smoker	60	prior to therapy	58	Male	Caucasian	WT	p.P191fs*56 + p.P59fs*>32 + p.P98fs*56	WT	WT	3.86	medium
NCI-H820	HTB-181	Lung Adenocarcinoma	ATCC	Lymph Node					53	Male	Caucasian	NA	NA	NA	NA	4.35	medium
NCI-H838	CRL-5844	Lung Adenocarcinoma	ATCC	Lymph Node	3B	Smoker	80		59	Male	Caucasian	WT	p.E62*	WT	WT	4.96	medium
PC9		Lung Adenocarcinoma	FL3C / IBL									NA	NA	NA	NA	8.39	fast
RERF-LC-MS		Lung Adenocarcinoma	FL3C / Manel Esteller									WT	p.F134fs*14 + p.F2fs*14 + p.F41fs*14	WT	WT	4.51	medium
SK-LU-1	HTB-57	Lung Adenocarcinoma	ATCC						60	Female	Caucasian	WT	p.H193R + p.H61R + p.H100R	p.G12D	WT	2	slow
Calu-1	HTB-54	Non-adeno NSCLC	FL3C	Pleura	3				47	Male	Caucasian	NA	NA	NA	NA	6.29	fast
Calu-6	HTB-56	Non-adeno NSCLC	FL3C						61	Female	Caucasian	WT	p.R196* + p.R64* + p.R103*	p.Q61K + p.G60G	WT	6.29	fast
NCI-H1299	CRL-5803	Non-adeno NSCLC	FL3C	Lymph Node				radiation therapy	43	Male	Caucasian	WT	c.1_954>AAG + c.1_782+607>AAG	WT	WT	5.31	fast
NCI-H1703	CRL-5889	Non-adeno NSCLC	FL3C		1	Smoker	50		54	Male	Caucasian	WT	c.919+1G>T	WT	WT	4.13	medium
NCI-H292	CRL-1848	Non-adeno NSCLC	FL3C	Lymph Node					32	Female	Black	NA	NA	NA	NA	6.87	fast
NCI-H460	HTB-177	Non-adeno NSCLC	FL3C / ATCC	Pleural Effusion						Male		WT	WT	p.Q61H	WT	11.32	fast
NCI-H520	HTB-182	Non-adeno NSCLC	FL3C							Male		p.P1101P	p.W146* + p.W14* + p.W53*	WT	WT	2.55	slow
BEAS-2B	CRL-9609	Non-transformed lung epithelial cells	FL3C									NA	NA	NA	NA
IMR-90	CCL-186	Non-transformed lung fibroblasts	FL3C / ATCC							Female (embryonic)	Caucasian	NA	NA	NA	NA
WI-38	CCL-75	Non-transformed lung fibroblasts	FL3C / ATCC							Female (embryonic)	Caucasian	NA	NA	NA	NA
