# Supplementary material for: The Circular RNA Landscape of Non-Small Cell Lung Cancer Cells
Source: Cancers (Basel). 2020 Apr 28;12(5):1091. doi: 10.3390/cancers12051091 (PMC7281449; doi:10.3390/cancers12051091)
Supplement: Supplementary file 1 [file cancers-12-01091-s001.zip › Suppl Table S2 circRNA data gene level.xlsx]

## Sheet: Table S2
Table S2: circRNA read counts aggregated at gene level (normalized for library size, average of 2-3 biological replicate RNA-Seqs)
Gene ID	Gene Name	A427	A549	BEAS-2B	Calu1	Calu3	Calu6	HCC2935	HCC4006	HCC827	IMR-90	NCI-H1299	NCI-H1373	NCI-H1395	NCI-H1435	NCI-H1437	NCI-H1563	NCI-H1568	NCI-H1573	NCI-H1623	NCI-H1648	NCI-H1650	NCI-H1651	NCI-H1666	NCI-H1693	NCI-H1703	NCI-H1734	NCI-H1755	NCI-H1781	NCI-H1792	NCI-H1793	NCI-H1838	NCI-H1944	NCI-H1975	NCI-H1993	NCI-H2009	NCI-H2023	NCI-H2030	NCI-H2073	NCI-H2085	NCI-H2087	NCI-H2122	NCI-H2126	NCI-H2228	NCI-H2291	NCI-H23	NCI-H2342	NCI-H2347	NCI-H2405
ENSG00000198691.11	ABCA4	0	0	0	0	0	0	0	0	0	0	0	0	0	0	0	0	0	0	0.452239	0	0	0	0	0	0	0	0	0	0	0	0	0	0	0	0.27011	0	0	0	0.344189	0	0	0	0	0	0	0	0	0
ENSG00000135776.4	ABCB10	1.28874	0	0.326655	0.673104	0.311608	0.513773	0	0	0	0.581	0	0	2.14588	0.898416	1.19168	0	1.24531	0.84403	1.26359	0.252769	1.00337	0.511333	0.331496	0	0	0	0	0.3276	0.649888	0.750738	0	0.252936	0.269653	0.188509	0.239396	1.71366	0.827579	0.843034	1.135	0	0.84492	0.192316	0	0.350407	1.07157	2.00499	0.605915	0.292993
ENSG00000117528.11	ABCD3	0	2.22086	1.88033	0	1.47061	2.02962	0.832651	0.735799	6.26081	0.547384	0	0.877386	0.571154	2.35474	3.42902	2.91939	2.16055	1.72057	2.33719	1.56255	3.64977	0.587585	0.331496	1.98846	0	0.432484	1.29173	2.76223	3.33752	2.34332	0.559112	1.23436	0.451851	0.790874	1.02431	2.35515	1.48009	0.8417	3.57509	1.37671	1.73376	0.470492	0.285371	0.384392	6.4791	0.568798	0.291488	0.966805
ENSG00000143322.19	ABL2	3.41999	7.88336	5.55267	5.7841	10.8022	8.28304	5.53169	2.07607	6.94713	4.47992	2.70353	7.16137	9.62603	6.43162	4.76925	7.83578	6.96357	8.83026	5.63962	3.23566	6.73286	5.38856	7.77774	8.57629	1.16702	2.62575	8.83157	4.2125	12.0378	6.43016	1.95689	3.5719	3.06571	5.9714	5.06753	4.03994	11.8811	3.37968	12.4546	0	2.15078	5.01371	3.61901	32.1001	5.11481	12.4087	10.2621	0.914989
ENSG00000117054.13	ACADM	1.83733	1.95144	0.820996	1.27775	1.20832	2.50413	0.255961	0.553919	2.25767	2.22315	2.15425	1.67966	0.917081	1.55272	0	6.8632	0.801624	1.72057	1.36214	0.276051	1.72501	0.77492	0.310838	2.41255	1.38541	1.37016	1.48622	0.443465	0.892968	2.57137	0.827238	2.00857	0.88059	3.28387	1.30713	0.582353	1.41307	1.51906	0	0	0.572065	1.51793	0.97053	2.46276	2.9785	1.28349	0.859026	1.94942
ENSG00000131584.18	ACAP3	0	0	0	0	0	0.217621	0	0	0	0	0	0	0	0	0	0	0	0	0	0	0	0	0	0	0	0	0	0	0	0	0	0	0	0	0	0.227166	0	0	0	0	0	0	0	0	0	0	0	0
ENSG00000182827.8	ACBD3	0	0	0	0	0	0	0.511922	0.22942	0	0	0	0	0.966029	0.168313	0.316699	0	0	0.292181	0	0	0.469438	0	0	0	0	0	0.596137	0.443465	0	0	0	0.252936	0	0	0	0	1.24956	0.16834	0.719152	0	0.580849	0.268967	0	0	0.269605	0.556767	0	0
ENSG00000230124.7	ACBD6	4.92835	2.55336	1.30638	1.81393	23.4624	6.67487	5.55555	3.50013	3.02652	1.17668	1.76452	3.04038	5.4127	4.87724	7.07498	6.17567	7.02402	11.3056	8.12503	2.73075	3.66725	2.99785	4.47657	7.72176	4.63054	2.73525	6.65197	3.91604	2.59955	8.62545	1.95689	9.34467	1.17335	3.93896	3.33033	3.37409	6.83066	2.88976	35.1672	1.82236	6.46322	5.514	3.16283	5.37789	7.55581	3.39066	3.73561	7.91721
ENSG00000162390.17	ACOT11	0	0.406923	0	0	0.311608	0.256886	0	0	0	0	0	0	0	0	0	0	0	0.292181	0.808643	0	0	0.170444	0	0	0	0	0	0	0	0	0	0	0	0	0	0	0	0	0	0	0	0.556353	0	0	0.267894	0	0	0.655807
ENSG00000097021.19	ACOT7	5.93211	0	0	0	0	0.256886	0	0.506379	0.281873	0	0.754819	0.24094	0	1.98299	0.241586	0	0	1.82614	0	0	0.958564	0.357779	1.25022	0	0	0	0.496832	0	0.859493	0.229511	0	0.551589	0.269653	0.261939	0.754201	1.23045	1.17097	0.67336	1.39214	0	0.725009	1.88277	0.4682	0	2.69434	0.360353	0.567539	2.70676
ENSG00000162836.11	ACP6	1.02497	0	0.406021	0	3.96562	2.4118	1.08062	0.68826	2.79044	0	0.251606	1.7214	0.345927	0.186709	3.50077	3.65793	7.58958	4.3217	7.65756	0.276051	1.19328	1.72028	0.918729	0.584256	0	1.7295	1.78223	1.65399	1.59743	1.06172	1.10679	1.86199	0.952222	2.82307	1.98719	0.710375	0.982139	0.858136	0	1.74118	0.853705	1.94941	0.97053	1.82	0	0.170753	1.86405	0.930796
ENSG00000077522.12	ACTN2	0	0	0	0	0	0	0	0	0	0	0	0	0	0	0	0	0	0	0	0	0	0	0	0	0	0	0	0	0	0	0	0.298654	0	0	0	0	0	0	0	0	0	0	0	0	0	0	0	0
ENSG00000143537.13	ADAM15	0	0	0	0	0	0	0	0	0.594723	0	0	0	0	0.187263	0	0	0	0	0	0	0	0	0	0	0	0	0	0.443465	0	0	0	0	0	0	0	0	0	0	0	0	0	0	0	0	0	0.170753	0	0
ENSG00000143382.14	ADAMTSL4	0	0	0	0	0	0	0	0	0	0	0	0	0	0	0	0	1.06143	0	0	0	0	0	0	0	0	0	0	0	0	0	0	0	0	0	0	0	0	0	0	0	0	0	0	0	0	0	0	0
ENSG00000160710.15	ADAR	0	1.43846	0	0	0.759961	0	0.216125	0	0	0	0	0	0.620102	0.187263	0.316699	0	1.07537	0.620888	1.36757	0	0	1.02162	0	0	0	1.22431	0.298068	0.706337	0	0.280616	0.547682	0	0	1.69683	0.478793	0	0	0	0.359576	0	0	0.278177	0	0	0.412543	1.57447	0.276051	0
ENSG00000163050.16	ADCK3	0	0	0.406021	0	0.401187	0.606096	0	0	0	0	0	0	0	0	0.316699	0.302829	1.91622	0.714196	0	0	0	0	0	0	0.692705	0	0.297039	0	0.704464	0	0	0.298654	1.34826	0.565528	0	0	0	0.33668	0	0	0.443369	0	0	0.350407	0.94833	1.37886	0	0.603991
ENSG00000143199.17	ADCY10	0	0	0	0	0	0	0	0	0	0	0	0	0	0	0	0	0.273746	0.422015	0	0	0	0	0.331496	0	0	0	0	0	0	0	0	0	0	0	0	0	0	0	0.359576	0	0	0	0	0	0	0	0	0
ENSG00000121753.12	ADGRB2	0	0	0	0	0	0	0	0	0	0	0	0	0	0	0	0	0.273746	0	0.291262	0	0.234719	0	0	0	0	0	0	0	0	0.229511	0	0	0	0	0	0	0	0.33668	0	0	0	0	0	0	0	0	0	0
ENSG00000117114.19	ADGRL2	0	0	1.72136	0	6.03252	2.71424	0	0	0	0	2.91979	0.318948	1.2402	0	0.558285	0.582502	0.811431	0	8.68419	0	4.35393	0.187335	0.276394	3.4491	8.71511	0	0	1.03394	0	4.84432	0	1.19462	0.269653	0.680851	0.509506	1.49763	1.70581	4.42393	2.79967	0	0.853705	0	0	1.15318	1.07671	2.51044	0	0
ENSG00000159346.12	ADIPOR1	0	0	0.494341	0	0	0.217621	0	0	0	0	0.286956	0	0	0	0	0	0	0	0.228832	0.228857	0	0	0	0	0	0	0	0	0	0	0	0	0	0	0	0	0	0	0	0	0	0	0	0	0.269605	0	0.291488	0
ENSG00000116863.10	ADPRHL2	0	0	0	0	0	0	0	0	0	0	0	0	1.03778	0	0	0	0	0	0	0	0	0	0	0	0	0	0.496832	0	0	0	0	0	0	0	0	0	0	0	0.911687	0	0	0	0	0.384392	0.269605	0.170753	0	0
ENSG00000035687.9	ADSS	0	0.406923	0.494341	0	1.16115	1.12737	0	0	1.06822	0.547384	0.286956	0.878836	0.345927	0	0.241586	0.302829	0	0.620888	0.520094	0.228857	0.234719	1.50737	0.918729	1.00834	0	0	0	1.1498	0.297656	0.739639	1.11822	0.252936	1.21708	0.450448	1.269	0.582353	0.447303	1.88328	1.39214	2.28507	1.46759	0.806902	0.570742	1.76195	0.682148	2.53008	0.552102	0.310998
ENSG00000186094.16	AGBL4	0	0	0	0	0	0	0	0	0	0	0	0	0	0	0	0	0	0	0	0	0	0	0	0	0	0	0	0.533761	0	0	0	0	0	0	0	0.227166	0	0	0	0	0	0	0	0	0	0	0	0
ENSG00000162688.16	AGL	0.483388	0.406923	0	0.673104	0.311608	0.217621	0	0.414318	0.815984	0	0.400444	0.637895	0.691854	0.523889	1.28304	0	1.05576	0.422015	3.27883	0.228857	0.496763	0.357779	1.19512	0.292128	0	1.22431	0	0.3276	0	1.03135	0	0	0	0.528934	0	1.31847	0.292743	0.33668	1.75172	0.364473	0.853705	0.83453	0	0	0.269605	1.06301	0	0.34481
ENSG00000116771.5	AGMAT	0	0	0	0	0	0	0	0	0.267055	0	0	0	0	0	0	0	0	0	0	0	0	0	0	0	0	0	0	0	0.297656	0	0	0	0	0	0	0	0	0	0	0	0	0	0	0	0	0	0	0
ENSG00000092847.11	AGO1	0	0	0	0	0.623215	0.99457	0	0	0.267055	1.12838	1.47757	0	0	1.81412	0.316699	0	0.891495	2.50782	1.74757	0	1.00337	0.77492	0	1.30047	0	0	0.893175	0.886929	0.352232	0.459022	0.547682	0	0.539305	0	0.478793	0.216034	0	0.338014	0	0	0	0.278177	1.00466	0.700813	0.269605	3.07402	0.582975	0
ENSG00000126070.19	AGO3	2.0941	0.343846	1.22702	1.27775	2.85808	2.97113	0.792815	0.414318	3.18006	0.581	0.825518	3.31324	0.285577	0.336626	1.67738	1.21752	4.19354	3.2788	8.6967	1.05764	2.00674	0.791811	0.884285	2.36248	3.02674	1.4378	2.67747	1.18896	1.54286	2.08198	1.65448	1.9077	2.27987	2.84955	0.993597	2.1826	4.8295	2.17243	7.79462	0.728946	1.00665	3.0437	0.787702	5.36797	5.12336	4.72388	2.65383	2.14098
ENSG00000134698.10	AGO4	1.03303	0.343846	0.653311	0.673104	0.535785	0.652864	0	1.28748	0	1.72407	0.400444	1.04177	0	0.373972	0.316699	2.91939	1.43899	0	2.94227	0	0.234719	0.493394	1.10558	0.983305	0.692705	0.432484	1.98717	0.796633	2.00424	0.730003	0.279556	0	0.610937	0.340425	1.30713	1.57451	2.22014	2.12713	1.63084	0	0.733794	0.961579	0	2.56788	0	1.25863	1.48038	1.17197
ENSG00000188157.14	AGRN	0	0	0	0	1.12088	0	0	0	0.267055	0	0	0	0	0	0	0	0	0	0	0.276051	0	0.732448	0	0	0	0.432484	0	0	0	0.250246	1.09536	0.597308	0	1.70213	0	0.710375	0.267418	0.16834	0.344189	0.728946	0	0.806902	0	0	0.53921	0.892258	0	0
ENSG00000153207.14	AHCTF1	3.30257	2.52173	0.812043	1.27775	1.7372	4.01997	0.216125	1.93346	0.861778	1.12838	0.790169	2.3593	2.00381	1.25344	1.28388	0.635017	0.263939	2.5646	1.49514	1.28587	1.97942	1.45565	1.52662	1.00834	2.44323	1.76629	2.48195	2.90366	1.4548	1.24013	1.93403	2.89856	1.60209	1.57669	0.527512	3.57448	1.86037	0.718665	5.32681	2.14343	2.5699	3.46952	2.00947	4.31675	2.14657	3.65565	0	2.44978
ENSG00000168710.17	AHCYL1	0	0	0	0	0.311608	0	0	0.735799	0.267055	0	0	0	0	0.523335	0	0.91469	0	0	0.454952	0	0	0	0	0	0	0	0	0	0.352232	0.790744	0	0	0	0	0	0	0.267418	0	0.688377	0.506118	0	0	0	0.513576	0	0	0	0
ENSG00000126705.14	AHDC1	0	0	0.494341	0	0	0.217621	0	0	0	0	0	0	0	0	0	0	0	0.422015	0	0	0	0	0	0.424084	0	0	0	0	0	0	0	0	0	0	0.718189	0	0	0	2.42471	0	0	0	0	0	0	0	0	0
ENSG00000186063.12	AIDA	0.263777	0	0	0.604644	0.224177	0	0	0	0	0	0.251606	0	0	0.187263	0	0	0	0	0.228832	0	0	0	0	0	0	0	0	0.3276	0	0	0	0	0	0	0	0	0.292743	0	0.344189	0	0	0	0	0	0.412543	0	0	0
ENSG00000163568.14	AIM2	0	0	0	0	0	0	0	0.276959	0	0	0	0	0	0	0	0	0	0	0	0	0	0	0	0	0	0	0	0	0	0	0	0	0	0	0	0	0	0	0	0	0	0	0	0	0	0	0	0
ENSG00000196581.10	AJAP1	0	0	0	0	0	0	0	0	0	0	0	0	0	0	0	0	2.71785	0	0	0	3.96647	0	0	0	0	0	0	0	0	0	0	0	0	0	0	4.57881	0	0.338014	0	0	0	0.470492	0	0	3.2267	0	0	0
ENSG00000004455.16	AK2	0	0.406923	0.326655	0	0	0	0	0	0.801166	0	0	0.481881	0	0.336626	1.11825	0	0.547492	0	1.04019	0.276051	0	0	0.587232	0.292128	0	0	0	0	0	0	0	0	0.88059	0.340425	0.239396	0	0	0.338014	1.06334	0	1.1617	0.547144	0	0	1.75201	0.354337	0	0
ENSG00000162433.14	AK4	0	0	0	0	0	0	0	0	0	0	0	0	0	0	0	0	0	0	0	0	0	0	0	0	0	0	0	0	0	0	0	0	0	0	0	0	0	0	0	0	0	0	0	0	0.412543	0.189599	0	0
ENSG00000154027.18	AK5	0	0	0	0	0	0	0	0	0	0	0	0	0	0	0	0.332188	0	0	0	0	0	0.187335	0	0	0	0	0.298068	0	0	0	0	0	0	0.188509	0	0	0	0	0	0	0	0	0	0	0	0	0	0
ENSG00000174574.15	AKIRIN1	0	0.306634	0	0.604644	0.934823	0	0.216125	0	0	0	0.800889	0	0	0	0.241586	0.291251	0.35381	0	0.520094	0.252769	0.524088	0	0	0.292128	0	0	0	0	0.704464	0	0	0.298654	0	0	0	0	0	0	0	0	0.290425	0	0	0.768784	0.269605	0.549952	0.276051	0.34481
ENSG00000117448.13	AKR1A1	1.76512	1.68202	0.653311	1.20929	1.65667	0	0.536854	1.05806	1.33528	0.629299	3.64254	0.24094	0	0.355576	0.874983	3.12257	3.21785	1.68806	5.06252	0.733766	1.00337	1.03956	0.552789	1.6713	0.692705	2.66718	1.09297	0	0	0.479757	2.48171	1.44755	0.610937	1.23627	0	0.864135	4.46973	4.13877	0	0	1.30586	3.67808	0.97053	0.734799	2.3092	6.11716	0.329864	0.310998
ENSG00000053371.12	AKR7A2	0	0	0	0	0	0	0	0	0	0	0	0	0	0	0	0	0.263939	0	0.22612	0	0	0.246697	0	0	0	0	0	0	0	0	0	0	0.269653	0	0	0	0	0	0	0	0	0	0	0	0	0	0	0
ENSG00000162482.4	AKR7A3	0	0	0	0	0	0	0	0	0	0	0	0	0	0	0	0	0	0	0.228832	0	0	0	0	0	0	0	0	0	0	0	0	0	0	0	0	0	0	0	0	0	0	0	0	0	0	0	0	0
ENSG00000117020.16	AKT3	22.4263	17.9301	19.6054	43.1011	34.9488	14.9363	0	2.94699	5.49063	5.57469	11.4596	5.35649	0	0.523889	0.800711	21.8164	6.10156	0	1.35672	0	34.0713	22.6278	1.7617	22.298	23.8113	2.22962	18.955	1.93045	4.16351	0.229511	5.55683	25.6652	0	0.188509	4.58344	0.648101	1.41307	1.02781	52.3129	0.87059	0	1.30502	1.68997	15.481	26.6148	0	3.27518	13.4433
ENSG00000203709.11	AL035209.2	0.995871	0.406923	1.3947	0	1.33601	0.949016	0	0	0	0	0	1.7214	0	0	0	0.291251	0	0.584363	0.748926	0	0	0.374669	0	0	0	0	0	0	1.19062	0.479757	0.559112	0.935708	0	0.528934	0	0	0	0	0.344189	0	0.725009	0.278177	0	0.513576	0.412543	0.379199	0.989591	0
ENSG00000229021.2	AL591893.1	0	0	0	0	0	0	0	0	0	0	0	0	0	0.187263	0.559125	0	0.273746	0	0	0	0	0.170444	0	0	0	0	0	0	0.297656	0	0	0	0	0.188509	0	0	0	0	0	0	0	0	0	0	0.53921	0	0	2.43177
ENSG00000159423.16	ALDH4A1	0	0	0	0	0	0	0	0	0	0	0	0	0	0	0	0	0.263939	0	0	0	0	0	0	0	0	0	0	0	0	0	0	0	0	0	0	0	0	0	0	0	0	0	0	0	0	0	0	0
ENSG00000143149.12	ALDH9A1	0.725083	0	0	0	0.535785	0.217621	0	0.414318	0	0	0	0	0	0	0.559125	0.605658	1.64248	0.84403	0.454952	0	0.262044	0.962255	1.28467	0.716212	0	0	1.39104	0.655199	1.15715	0	0.279556	0	0	0.188509	0	0.4432	0.714721	0	0.688377	0	0.28164	0.268967	0.753571	1.02715	0.951753	0.733536	0.935778	1.50098
ENSG00000088035.15	ALG6	0	0.306634	0	0	1.34506	0	0.216125	0.276959	0.563747	0	1.0525	0	0.285577	0	1.28388	0.332188	0	0.422015	0.678359	0	0	0	0.276394	0.292128	0	0	0	0.26688	0	0	0	0	0.903702	0.450448	0	0	0	1.02781	2.06513	0	0.56328	1.47892	0.4682	0	0.535787	0.379199	0.582975	0
ENSG00000116748.21	AMPD1	0	0	0	0	0	0	0	0	0.594723	0	0	0	0	0	0	0	0	0	0	0	0	0	0	0	0	0	0	0	0	0	0	0	0	0	0	0	0	0	0	0	0	0	0	0	0	0	0	0
ENSG00000116337.15	AMPD2	0	0	0	0	0	0	0	0	0	0	0	0	0	0	0	0	0	0	0	0	0	0	0	0	0	0	0	0	0	0	0	0	0	0	0	0	0	0	0	0	0	0.268967	0	0	0	0	0	0
ENSG00000237763.9	AMY1A	0	0	0	0	0	0	0	0	0	0	0	0	0	0	0	0	0	0	0	0	0	0	0	0	0	0	0	0	0	0	0	0	0	0	0	0	0	0	0	0	0	0	0	0	0	0	0	0
ENSG00000240038.6	AMY2B	0	0	0	0	0	0	0.255961	0	0.53411	0.581	0	0.481881	0	0	0	2.75565	0	0	0	0	0	0	2.13451	0	0	0.322986	0.893175	0	0	0	0	0	0.56721	0.188509	0.993597	0	0.292743	0.16834	0	0	0	0	0.97053	1.02715	0	0	0	0
ENSG00000174606.13	ANGEL2	0	0.687692	0	0	0	0	0	0.68826	0	0.547384	0	0.318948	0	0	0	0.332188	0	0	0	0	0	0	1.30533	0.424084	0	0	0.496832	0	0.297656	0.688534	0	0	0	0.188509	0.27011	0	0	0	1.42292	0.364473	0	0	0.9364	0.897968	0	0	0	0.34481
ENSG00000116194.12	ANGPTL1	0	0	0	0	0	0	0	0	0	0	0	0	0.285577	0	0	0	0	0	0	0	0	0	0	0	0	0	0	0	0	0	0	0	0	0	0	0	0	0	0	0	0	0	0	0	0	0	0	0
ENSG00000118454.12	ANKRD13C	7.44974	8.71413	4.8287	6.99338	12.9856	4.83619	3.73996	5.24723	21.6166	7.5445	10.3825	11.0011	3.70587	4.42971	4.37576	9.37929	16.7964	14.0163	10.5971	6.21981	9.33582	5.15111	7.53668	9.74162	4.41215	9.71075	8.34123	5.95834	7.3162	8.91043	5.00915	7.91204	9.05743	12.4546	8.15528	8.63649	11.7339	10.2048	24.99	3.05743	3.63383	15.6719	4.22403	21.6241	12.5936	9.32992	5.26178	9.81711
ENSG00000183831.6	ANKRD45	0	0	0	0	0	0	0	0	0	0	0	0	0	0	0	0	0	0	0	0	0	0	0	0	0	0	0	0	0	0	0	0.298654	0	0.377018	0.27011	0	0	0	0.344189	0	0	0	0	0	0	0	0	0
ENSG00000143401.14	ANP32E	1.06212	0.613268	1.64199	0.604644	1.20832	1.46908	0.216125	0.276959	0	1.75768	2.33844	0.757641	0.571154	0.504939	3.51954	0.302829	3.6796	0.620888	0	0	0.234719	2.42659	0.276394	0.292128	1.16702	0.432484	1.09194	1.05951	0	0.280616	1.37492	0	0.88059	0.717444	1.03702	0.659234	0.585486	0.535223	2.09591	0.506118	0.725009	0.999217	1.29003	1.24837	0.808815	0.170753	0	0
ENSG00000143412.9	ANXA9	0	0	0	0	0	0	0	0	0	0	0	0	0	0	0	0	0.273746	0	0	0	0	0	0	0	0	0	0	0	0	0	0	0	0	0	0	0	0	0	0	0	0	0	0	0	0	0	0	0
ENSG00000134262.12	AP4B1	0	0	0	0	0	0.435243	0.255961	0.22942	0	0	0	0	0.345927	0	0.241586	0	0.70762	0	0.228832	0	0	0	0.331496	0	0	0	0.297039	0	0	0	0	0	0	0	0	0.659234	0.292743	0.521456	0	0	0	0	0	0	0.267894	0	0	0
ENSG00000117362.12	APH1A	0	0	0	0	0	0	0	0	0	0	0	0	0	0	0	0	0	0	0	0	0	0	0	0	0	0	0	0	0	0	0	0	0	0	0	0	0	0	0	0	0	0	0	0	0	0.183584	0	0
ENSG00000251503.8	APITD1-CORT	0.995871	1.22077	0	0	0.311608	0.776948	0.832651	0	1.12749	0.629299	0	0	0	0.355576	1.35984	2.25502	0	0.913069	0.808643	0	0	0.587585	0	0	0.583509	0	0	0.3276	2.11339	1.14756	0	0	3.02199	0.523879	0	4.70892	0.534836	0.50502	1.04795	0	0.862489	0	0	0.700813	1.07842	1.61898	0	2.01704
ENSG00000143761.15	ARF1	0	0	0	0	0	0	0	0	0	0	0	0	0	0	0	0	0	0	0	0	0.234719	0	0	0	0	0	0	0	0	0	0	0	0	0	0	0	0.267418	0	0	0.364473	0	0	0	0	0	0	0	0
ENSG00000137962.12	ARHGAP29	0	1.22077	4.73143	4.43789	6.55665	1.25146	0.792815	7.08181	1.09786	0	1.98078	7.35075	0	1.96348	0.724757	2.4644	3.57011	1.0429	0.748926	3.71791	7.9253	0.604476	1.4853	3.80168	0	0.755471	0	2.13661	2.13817	1.2705	1.10679	0.252936	3.64395	7.20646	5.60775	0.670366	1.41307	1.02781	10.4396	0.728946	0	0.999217	0.97053	11.0481	0.803681	0.898274	4.0954	0
ENSG00000186517.13	ARHGAP30	0	0	0	0	0	0	0	0	0	0	0	0	0	0	0	0	0.273746	0	0	0	0	0	0.276394	0.424084	0	0	0	0	0	0	0	0	0	0	0	0	0	0	0	0	0	0	0	0	0	0.183584	0	0
ENSG00000074964.16	ARHGEF10L	1.9998	2.07759	0	0	0.311608	0.256886	3.01192	0.414318	0.876596	0.547384	0	0.559888	2.72844	1.45854	0.241586	0.302829	1.32537	1.75309	1.03476	1.51536	1.22825	2.71632	0.60789	0.716212	0	0	0.595107	1.12824	2.46562	1.2705	0.827238	0.505871	0.225925	1.91206	0.257402	0.227166	5.02094	1.5466	3.02298	0	0.290425	1.43207	1.54127	0	0.808815	2.75136	0.605915	0.603991
ENSG00000132694.18	ARHGEF11	0.263777	1.26375	0	0	0.934823	0	0	0	0.563747	0	0.573911	0	0	0.355576	0	0.332188	0.617749	0	0	0	1.428	0.77492	0	0	0	0	0.7949	0	0.704464	0.250246	0	0.298654	0.56721	0.790874	0	0	1.72219	0.16834	0	0	0.28164	0	0.787702	0	1.90008	0.189599	0	0.87898
ENSG00000130762.14	ARHGEF16	0	0	0	0	0.224177	0	0	0	0.281873	0	0	0	0	0	0	0	0.263939	0	0.904479	0.457715	0	0	0	0	0	0.432484	0	0	0	0	0.279556	0	0	0	0	0	0	0	0	0	0	0	0	0	0	0.170753	0.276051	0
ENSG00000142632.16	ARHGEF19	0.270788	0	0.494341	0	0	0.256886	1.28983	0.276959	1.36491	0	0.251606	0.318948	0	0.168313	0.241586	0.908487	0.527878	1.66379	1.61729	1.31041	0.262044	1.54879	1.89256	0	0	1.18796	0.496832	0	0.892968	0	0	0	0.269653	0.523879	2.33674	0.681498	1.17097	0.733767	1.07873	0	0	0.73025	0.285371	0	1.09469	0.550752	0.276051	0.585987
ENSG00000116584.17	ARHGEF2	0	0	0	0	0	0.474508	0	0	0.548928	0	0.251606	0.998581	0	0.187263	0.558285	0.302829	0	1.0429	0	0	0.234719	0	0.884285	0	0	0	0.891116	0.533761	0	0.561233	0	0	0.269653	0	0	0	2.04025	0	0	0	0.56328	0	0.4682	1.15318	0.267894	0.341506	0.291488	1.84798
ENSG00000117713.19	ARID1A	1.28874	0.687692	0.820996	0	0.224177	2.08268	1.77682	0.45884	0.281873	1.17668	0.286956	0.998581	0	1.25288	0	0.623439	1.94312	1.82614	4.20962	0.228857	1.25557	1.65223	0.276394	4.593	0.583509	1.4378	3.27582	1.54213	0	2.6683	0.279556	0	0.269653	0.974327	0.748903	1.29273	1.48009	2.53044	1.03257	0	0.56328	1.20995	1.89505	0.350407	2.68749	3.88929	1.21183	1.46497
ENSG00000054267.21	ARID4B	1.04705	3.30413	1.63304	1.27775	9.50646	1.0806	1.94512	2.7168	1.91384	0.581	1.00643	3.71857	5.98385	1.44015	1.43411	4.27517	1.64248	1.42839	3.76552	2.40813	2.88333	2.12978	4.96646	1.96661	0.583509	2.3704	4.06541	2.78223	0.649888	1.34234	0.547682	5.19038	2.80815	1.84874	1.5084	3.58561	0.878229	2.59084	5.11889	2.38894	2.7492	1.66203	2.6605	2.46276	1.61763	5.38884	3.71173	1.31161
ENSG00000143862.7	ARL8A	0	0	0	0	0	0	0	0	0	0	0	0	0	0	0	0	0	0.422015	0	0	0	0.187335	0	0	0	0	0.298068	0.176584	0	0	0	0	0	0	0	0.648101	0.267418	0.366884	0	0	0	0	0	0	0	0	0	0.292993
ENSG00000143437.20	ARNT	0.754177	0	0	0	0	0	0.216125	0	0.53411	1.2103	0.538562	0.24094	2.50321	0.728994	0.874983	0.291251	0.273746	1.86266	1.13874	0	0.479282	1.65063	0	0	0.692705	0	0.298068	0.3276	0.595312	0.459022	0	0	0.903702	0.450448	0.748903	0	0.560161	0.520122	1.25588	0	1.17716	0.537934	0	1.05122	1.07671	0.898274	0.276051	0.292993
ENSG00000173409.13	ARV1	0	0	0	0	0	0	0	0	0	0	0	0	0	0	0	0.332188	0	0	0.228832	0	0	0	0	0	0	0	0	0.504184	0.352232	0	0.279556	0	0	0	0	0	0	0	1.07873	0	0.28164	0	0	0	0	0	0	0
ENSG00000088280.18	ASAP3	0	0	0	0	0	0.256886	0	0	0	0	0.400444	0	0	0	0	0	0	0	0	0	0.234719	0	0.331496	0	0	0	0	0.26688	0.297656	0	0	0.298654	0	0	0	0	0	0	2.36538	0	0	0	0	0	0	0.354337	0	0
ENSG00000116539.12	ASH1L	23.2119	21.6547	12.3323	17.82	41.3618	31.9088	30.4431	15.7431	25.7423	15.8381	21.1012	23.9591	18.8587	16.3622	26.2349	52.3213	21.588	35.7791	60.9719	15.5007	20.2537	28.264	36.7096	21.3211	8.71511	25.3355	24.7996	44.2032	35.5169	24.8975	27.853	14.3333	32.1645	25.6905	36.6146	18.9936	20.2198	36.5378	52.1147	21.1321	46.4268	32.9079	37.0831	36.9482	89.082	84.8085	43.0921	28.0359
ENSG00000066279.17	ASPM	2.24851	0.994326	0.653311	0.604644	1.12088	2.45736	1.39444	1.33726	1.35009	2.87138	3.1147	1.79941	0.905678	0.730103	1.91896	1.50257	1.77318	4.39074	2.14009	0.252769	0.731482	1.1327	1.26401	0.716212	0.583509	0.937678	1.48725	1.00837	1.91619	2.12781	0.838668	1.23436	0.269653	0	0.257402	2.31828	3.31514	1.05535	3.33333	8.35088	1.12656	0.192316	2.1923	3.07829	3.63411	0.91712	0.567539	1.2598
ENSG00000152092.15	ASTN1	0	0	0	0	0	0	0	0	0	0	0	0	0	0	0	0	0	0	0	0	0	0.357779	0	0	0	0	0	0	0	0	0	0	0	0	0	0	0	0	0	0	0	0	0	0	0	0	0	0
ENSG00000197785.13	ATAD3A	0	0	0	0	0	0	0	0	0	0	0.251606	0	0	0	0	0	0	0	0	0	0.262044	0.246697	0	0	0	0	0	0	0	0	0	0	0	0	0	0	0	0	0	0	0	0.278177	0.285371	0	0.267894	0	0	0.310998
ENSG00000160072.19	ATAD3B	0.241694	0	0	0	0	0.435243	0	0	0	0	0.400444	0.559888	0	0.523335	0.316699	0	0.263939	0	0.228832	0.686572	0	0.851173	0	0.292128	0	0	0	0.26688	1.15715	0.250246	0.279556	0.72849	0	1.27792	0.514804	0.355187	0.714721	0.351782	1.42292	0.364473	0	0	0	0	1.075	0.52509	0	0.310998
ENSG00000215915.9	ATAD3C	0	0	0	0	0	0	0	0	0	0	0	0	0	0	0	0	0	0	0	0	0	0	0	0	0	0	0	0	0	0	0	0.252936	0.269653	0	0	0	0	0	0	0	0	0	0	0	0	0	0	0
ENSG00000162772.16	ATF3	0	0	0	0	0.311608	0	0	0	0	0	0	0	0	0	0	0	0	0	0	0	0	0	0	0	0	0	0	0	0	0	0	0	0	0	0	0	0	0	0	0	0	0	0	0.513576	0	0	0	0
ENSG00000118217.5	ATF6	1.50134	2.79115	1.79201	0	3.26617	1.9373	2.69226	1.5169	1.47132	0.629299	1.32873	2.47212	0.691854	1.3649	1.91728	1.18816	0	2.79599	2.16536	0.734396	3.74159	0.962255	2.21115	3.8263	2.44323	0.322986	3.47134	1.98159	2.7	1.2816	0.279556	1.41126	1.80011	1.77001	0.54022	0.937541	2.25702	1.88194	4.41206	1.96401	2.03087	2.45972	1.00466	1.21439	5.8038	1.80858	1.15051	3.39638
ENSG00000125703.14	ATG4C	0.798342	1.09461	0.820996	1.34621	1.56019	1.85877	0.216125	0.506379	0.563747	1.2586	0.860867	0.963762	2.45426	1.08457	0	1.60222	0.811431	2.72695	1.72397	0.758308	1.44548	0.493394	1.49218	6.77303	0	1.29745	2.28524	1.12423	3.3921	1.24013	1.16973	1.02714	1.03488	0.712388	1.81452	1.35186	2.51288	1.01271	4.51755	0.728946	0.290425	2.80671	2.40926	0	2.60192	0.872612	0.276051	0.637803
ENSG00000159363.17	ATP13A2	0.270788	0	0	0	0	0	0	0.22942	0	0	0	0	0	0	0	0	0	0	0.228832	0	0	0.340888	0	0	0	0	0	0	0	0	0.279556	0	0	0	0	0	0	0	0	0	0	0	0	0	0	0	0	0
ENSG00000163399.15	ATP1A1	0	0	0	0	0	0.217621	0.255961	0	0	0	0	0.24094	0	0.373418	0.241586	0	0	0.422015	1.88766	0	0	0	0	0	0	0	0	0	0.297656	0	0	0	0.225925	0.188509	0.257402	0.227166	0	0.183442	0	0.506118	0	0	0	0	0.269605	0.354337	0	0.310998
ENSG00000143153.12	ATP1B1	0	0	0	0	0	0	0	0.276959	0	0	0	0	0.285577	0	0.724757	0.291251	0	0	0	0	0	0	0	0	0	0	0	0.176584	0	0	0	0	0	0	0	0	0	0	0	0	0	0	0	0	0	0	0	0
ENSG00000058668.14	ATP2B4	0	0.750769	0.406021	2.5555	0	2.20798	2.08956	1.24295	2.82141	5.19113	1.07712	2.16155	0.285577	0.74739	0.241586	4.61976	0.791817	0.714196	1.26902	0	4.88023	1.90762	0.884285	1.1403	0.692705	0.432484	3.67437	0.3276	4.61619	6.08152	1.39778	0.72849	2.89081	2.29919	2.04332	1.35848	0.802255	0	6.37476	1.09342	0.443369	1.20995	0.4682	7.07187	1.34631	2.90928	3.24431	1.60461
ENSG00000116459.10	ATP5F1	0	0	0	0	0.448354	0.256886	0.216125	0	0	0	0.286956	0.24094	0.620102	0	0.800711	0.623439	0.547492	0	0.22612	0.252769	0	0	0	0.399049	0	0	0	0	0.704464	0	0.827238	0	0	0	0	0.710375	0	0.183442	0.344189	0	0	0	0.502331	0.384392	0.803681	0	0	0
ENSG00000117410.13	ATP6V0B	0	0	0	0	0.672531	0	0	0	0	0	0	0.438693	0	0	0	0	0	0	0	0	0	0	0	0	0	0	0	0	0	0	0	0	0	0	0	0	0.534836	0	0	0.506118	0	0	0	0.513576	0	0	0.552102	0
ENSG00000143515.16	ATP8B2	0.791331	0	0	0	0	0	0	0	0	0	0	0	0.620102	0.168313	0	0	0	0	0	0.228857	0	0.357779	0	0.424084	0	0.468839	0	0	0	0	0	0	0	0	0	0	0.447303	0.917209	0	0	0	0	0	0	0.267894	0	0	0
ENSG00000123472.12	ATPAF1	0	0.306634	0.494341	0	0	0	0	0	0	0	0	0	0	0	0	0.302829	0.35381	0	0	0	0	0	0	0	0	0	0.297039	0	0	0	0.279556	0.252936	0	0	0	0	0	0	0.688377	0	0	0	0	0	0.269605	0	0	0
ENSG00000162650.16	ATXN7L2	0	0	0	0	0	0	0	0	0	0	0	0	0	0	0	0	0	0	0	0	0	0	0	0	0	0	0	0	0.352232	0	0	0	0	0	0	0	0	0	0	0	0	0	0	0	0	0	0	0
ENSG00000127423.10	AUNIP	0	0	0	0	0	0	0	0	0	0	0	0	0	0	0	0	0	0	0	0	0	0	0	0	0	0	0	0	0	0.229511	0	0	0	0	0	0	0	0	0	0	0	0	0	0	0	0.183584	0	0
ENSG00000175756.13	AURKAIP1	0	0	0	0	0	0	0	0	0	0	0	0	0	0	0	0	0	0	0	0	0	0	0	0	0	0	0	0	0	0	0.279556	0	0	0	0	0	0	0	0	0	0	0	0	0	0	0	0	0
ENSG00000162779.21	AXDND1	0.270788	0	0	0	0	0	0	0	0.563747	0	0	0	1.03778	0	0	0	0	0	0.228832	0.504909	0	0.246697	0	0.424084	0.692705	0.432484	0.596137	0	0	0	0	3.89539	0	0.188509	0	0	0	0.16834	0	0	0	0	0.285371	1.05122	0	0	0	0
ENSG00000142920.16	AZIN2	0	0	0	0	0	0	0	0	0	0	0	0	0	0	0	0	0	0	0	0	0	0	0	0	0	0	0.298068	0	0.561837	0	0	0	0	0	0	0	0	0	1.04795	0	0	0	0	0	0	0	0	0
ENSG00000162885.12	B3GALNT2	1.47225	3.69077	0.494341	3.09168	2.99053	1.99035	0.511922	1.15012	3.10329	2.25677	2.95514	0.878836	3.07437	3.75865	3.44359	1.86411	2.76436	3.41688	5.09321	1.03373	3.7864	2.9047	3.6887	4.08703	1.85972	0.791825	3.27685	4.72866	2.4904	7.63846	4.14762	2.85881	5.84116	0.754037	1.54652	2.92637	3.09355	1.92858	9.48479	0.364473	2.27947	2.81375	0.856112	3.83716	6.51249	5.86829	2.92988	5.90017
ENSG00000158850.14	B4GALT3	0	0	0	0	0	0	0	0	0	0	0	0	0	0	0	0	0	0	0	0	0	0	0	0	0	0	0	0	0	0	0	0	0	0	0	0	0	0	0	0	0	0.384632	0	0	0	0	0	0
ENSG00000137936.16	BCAR3	0.263777	2.93442	3.02774	0.604644	1.56234	21.4148	3.21801	2.21119	11.8296	6.2859	7.23901	4.88298	1.25161	5.08343	3.12605	18.4728	15.7634	5.03189	14.0451	1.51599	6.3235	1.772	4.34478	6.26748	0	2.80796	6.55163	0.800641	8.7673	6.7146	1.94546	0.895961	3.25271	11.4858	8.34486	4.20797	4.79523	2.9977	27.7827	4.97803	2.45877	6.14483	5.42354	9.63974	1.3446	7.3826	7.88482	5.07081
ENSG00000162373.12	BEND5	0	0	0	0	0	0	0	0	0	0	0	0	0	0	0	0.582502	0	0	0	0	0	0	0	0	0	0	0	0	0	0	0	0	0	0	0	0	0	0	0	0	0	0	0	0	0	0	0	0
ENSG00000117475.13	BLZF1	0	0	0	0	0	0	0.432249	0	0	0	0	0	0	0.168313	0.316699	0.926268	0	0.876544	0	0	0	0.187335	0	0	0	0	0	0	0	0	0.547682	0	0	0	0	0	0	0.50502	1.03257	0	0	0	0	0	0	0.183584	0	0
ENSG00000183682.7	BMP8A	0	0	0	0	0	0	0	0	0	0	0	0	0	0	0	0	0	0	0	0	0	0	0	0	0	0	0	0	0	0	0	0	0	0.261939	0	0	0	0	0	0	0	0	0	0	0	0	0	0
ENSG00000116985.11	BMP8B	0	0.687692	0	0	0	0	0	0	0	0	0	0	0	0	0	0	0	0	0	0	0	0.187335	0	0	0	0.322986	0.297039	0.26688	0	0	0	0	0	0	0	0	0	0.550325	0	0	0	0	0	0	0	0	0	0
ENSG00000163141.18	BNIPL	0	0	0	0	0	0	0	0	0	0	0	0	0	0	0	0	0	0	0.912616	0	0.262044	0	0	0	0	0	0	0	0	0	0	0	0	0	0	0	0	0	0	0	0	0	0	0	0	0.373183	0	0
ENSG00000162813.17	BPNT1	0	0	0	0	0.401187	0	0	0	0	0	0	0	0	0	0	0	0	0	0	0	0	0	0	0	0	0	0	0	0	0.250246	0	0	0	0	0	0	0	0	0	0	0	0	0.502331	0	0	0.379199	0	0
ENSG00000137948.18	BRDT	0	0	0	0	0	0	0	0	1.67776	0	0	0	0	0.186709	0	0	0	0	0	0	0	0	0	0	0	1.4378	0	0	0	0	0	0	0	0	1.71179	0	0	0	0	1.09342	0	0	0	0	0	0	0	0
ENSG00000162670.10	BRINP3	0.270788	0	0	0	0	0	0	0	0	0	0	0	0	0	0	0	0	0	0.912616	0	0	0	0	0	0	0	0	0	1.00212	0	0	0	0	0	0	2.51205	0	0	0	0	0	0	0	0	1.75372	0	0	0.292993
ENSG00000162819.11	BROX	1.59564	2.04038	1.80968	1.88239	2.05095	1.812	1.18523	1.42708	2.77562	1.12838	0.503213	1.60021	3.45927	0.373972	1.19252	1.81697	1.14563	3.34784	2.40233	0.91543	0.524088	2.21424	3.31589	2.52265	1.27621	0.791825	3.17651	1.03394	4.51574	2.11235	0.547682	0.551589	4.66781	1.69177	1.80393	0.875267	0.714721	1.19348	7.06842	0.364473	0.572065	1.94941	5.45782	3.93236	0.951753	6.65268	2.16304	0.689619
ENSG00000160058.18	BSDC1	0	0	0	1.27775	0	0	0	0	0	0.581	0.286956	0	0	0	0	0	0	0	0.228832	0	0	0	0	0	0	0	0	0	0	0	0	0	0	0.450448	0	0.681498	0	0.16834	0	0	0	0	0	0	0	0.183584	0	0
ENSG00000189195.12	BTBD8	0	0	0	0	0.672531	0	0	0.22942	0	0	0	0	0.620102	0.186709	0.558285	0	0.527878	0.620888	0.22612	0	1.48265	0	0.276394	0.424084	0	0	0	0.353169	1.15715	0	0	0.252936	0.225925	0.377018	0	0	0	0	0.359576	0	0.28164	0.384632	0	0	1.49096	0	0	0
ENSG00000134717.17	BTF3L4	0	0	0	0	0	0	0	0	0	0	0	0	0.571154	0	0	0	0	0	0	0	0	0	0	0	0	0	0	0	0	0	0	0	0	0	0	0	0	0.338014	0.344189	0	0	0	0	0	0	0	0	0
ENSG00000179397.17	C1orf101	0.263777	0	0	0.604644	0	0	0	0	0.801166	0.547384	0	0	0	0	0	1.25846	0	0	0	0	0	1.11581	1.16068	0	0.692705	0.468839	0.893175	0	0.649888	0.750738	0	0	0.269653	0.340425	0	1.13583	0	0.50502	1.135	0	0.886738	0.268967	0	0	0.682148	0	0	0
ENSG00000163362.10	C1orf106	0	0	0	0	0	0	0	0	0	0	0	0	0	0.186709	0	0	0	0	0	0.252769	0	0.791811	0	0	0	0	0	0	0	0	0	0	0	0	0	0	0	0	0	0	0	0	0	0	0	0	0	0
ENSG00000000460.16	C1orf112	0.241694	0	0.820996	1.27775	0	2.01583	0.432249	0.22942	0.815984	1.17668	0.251606	0	0.345927	0.336626	1.67738	0	0.527878	0.292181	0.22612	0.939342	0.714001	0.246697	0.863627	0.691177	0	1.07846	0.496832	0.3276	0.352232	0.561233	0	0.682772	0	0.188509	1.53911	0	0	0	2.08052	1.77895	0.443369	0	0.787702	0.384392	0.805392	0.189599	0	0.603991
ENSG00000182795.12	C1orf116	0.527554	1.77096	0	0	14.9089	0.256886	15.0905	6.6743	0.801166	0	0	2.99574	5.02923	3.83279	1.91644	0	0	4.96686	0.517381	2.3364	1.21076	0.562004	0.276394	0	0.692705	1.33381	0.496832	11.4245	0	0.841849	2.7727	0.859673	0.495578	5.75616	4.92239	0	0	1.5919	1.63084	7.21969	0.28164	3.24522	3.87025	36.1171	0.267894	9.30586	40.0855	0
ENSG00000162384.13	C1orf123	0	0	0	0	0	0	0	0	0	0	0	0	0	0	0	0	0	0	0	0	0	0	0	0	1.38541	0	0	0	0.352232	0	0	0	0	0	0	0	0	0	0	0	0	0	0	0	0	0	0	0
ENSG00000143633.12	C1orf131	0	0	0	0	0	0	0.255961	0	0	0	0	0	0	0	0	0	0	0	0	0.228857	0	0	0	0	0	0	0	0	0	0.229511	0	0	0	0	0	0	0	0	0	0	0	0	0	0	0	0	0.276051	0
ENSG00000204006.8	C1orf185	0	0	0	0	0	0	0	0	0	0	0	0	0	0	0	0	0	0	0	0	0	0	0	0	0	0	0	0	0	0	0	0	0	0	0	0	0	0	0	0	0	0	0	0	0	0	0	0
ENSG00000263961.7	C1orf186	0	0	0	0	1.11398	0	0	0	0	0	0	0	0	0	0	0	0	0	0	0	0	0	0	0	0	0	0	0	0	0	0	0	0	0	0	0	0	0	0	0	0	0	0	0	0	0	0	0
ENSG00000119280.16	C1orf198	0.263777	0	0	0.673104	0.448354	0	0	0	0	0.581	0	0	0	0.373418	0	0	0	0.292181	0.454952	0.828154	0	1.02162	0	0.292128	0	0	0	0.26688	0.297656	1.2305	0	0	0.269653	2.22601	0.514804	0	1.30021	0	0.927074	0	0	0	0	0	0.537499	0.885443	0	0.34481
ENSG00000116667.12	C1orf21	0	0	0	0	0.311608	0	0	0	0	0	0	0	0	0	0	0	0	0	0	0	0	0	0	0	0	0	0	0	0	0	0	0	0	0	0	0.216034	0	0	0.344189	0	0	0	0	0	0	0	0	0
ENSG00000198520.10	C1orf228	0	0	0	0	0	0	0	0	0	0	0	0	0	0	0.559125	0	0	0	0.228832	0	0	0	0	0	0	0	0	0	0	0	0	0	0	0	0	0	0	0	0	0	0	0	0	0	0	0	0	0
ENSG00000157181.15	C1orf27	0.791331	0.957114	0	0	2.58459	3.3809	1.41626	2.43759	0.267055	0.629299	1.29338	0	8.71229	0	0	4.95195	1.06143	0.292181	5.28864	1.1042	1.40831	2.38622	2.99814	0.983305	0.583509	1.76078	4.17311	0.26688	0	0.229511	0	1.11261	0.269653	0	0.478793	1.9777	0	2.08582	3.17464	0	2.17713	0.845915	1.22177	2.17041	0.94833	4.22445	1.97918	2.27842
ENSG00000143793.12	C1orf35	0	0	0	0	0	0	0	0	0	0	0	0.24094	0	0	0	0	0	0	0	0	0	0	0	0	0	0	0	0	0	0	0	0	0	0	0	0	0	0.33668	0	0	0	0	0	0	0	0.189599	0	0
ENSG00000143612.19	C1orf43	0	0.306634	0	1.20929	0	0	0.320729	0	0	0	0.251606	0	0	0	0	0.582502	1.05576	0	1.42457	0.228857	0	0.680729	0	0	0	0	0	0.504184	0.352232	0	0	0	0.269653	0.565528	0	0.227166	0	0	0.703765	0	0	0	0	0	0.269605	0.708674	0	0
ENSG00000164008.15	C1orf50	0	0	0	0	0	0	0	0	0	0	0	0	0	0	0	0	0	0	0	0	0	0	0	0	0	0	0	0	0	0	0	0	0	0	0	0	0	0	0	0	0	0	0	0	0	0	0	0
ENSG00000118292.8	C1orf54	0	0	0	0	0	0	0	0	0	0	0	0	0	0	0	0	0	0	0	0	0	0	0	0	0	0	0	0	0	0	0	0	0	0	0.257402	0	0	0	0	0	0	0	0	0	0	0	0	0
ENSG00000125462.16	C1orf61	0	0	0	0	0	0	0	0	0	0	0	0	0	0	0.483172	0	0	0	0.228832	0	0	0.170444	0	0	0	0	0	0	0	0	0	0	0	0	0	0	0	0	0	0	0	0	0	0	0	0	0	0
ENSG00000184163.3	C1QTNF12	0	0	0	0	0	0	0	0.414318	0	0	0	0	0	0	0	0	0	0	0	0	0	0	0	0	0	0	0	0	0	0	0	0	0	0	0	0	0	0	0	0	0	0	0	0	0	0.189599	0	0
ENSG00000158966.13	CACHD1	1.04004	0.306634	0	0	0.849541	1.94359	0	0	0	0.547384	4.2378	0	0.285577	0	0	1.2291	0.263939	0.584363	0.22612	0	0.714001	0.246697	1.927	1.69952	0.583509	0	0	0	0	1.00098	0	0	0	0.261939	0	1.9297	2.72965	0.33668	0	0	1.16838	0	0	0.384392	1.90351	0.562783	0	0
ENSG00000198216.11	CACNA1E	0	0	0	0	0	0	0	0	0	0	0	0	0	0	0	0	0	0	0	0	0	0	0	0	0	0	0	0	0	0	0	0	0	0	0	0	0	0	0.344189	0	0	0	0	0	0	0	0	0
ENSG00000116161.17	CACYBP	0	0	0	0	0	0	0	0	0	0	0.400444	0.24094	0	0	0	0	0.627556	0	0.22612	0	0	0.187335	0	0	0	0	0.298068	0.176584	0	0	0	0	0	0	0.239396	0	0	0.16834	0	0	0	0	0	0	0.535787	0.189599	0	0
ENSG00000118200.14	CAMSAP2	6.02657	0.957114	2.78069	2.5555	5.75382	2.73554	2.85745	2.48513	3.81286	1.80598	3.59647	3.03893	1.19126	3.06534	4.07783	2.47597	3.75553	6.26542	6.57854	3.00869	8.55732	5.39122	4.20017	7.00831	1.96892	2.84475	2.68071	8.30111	5.79442	4.25125	0	3.07546	4.89373	3.72902	0.496798	4.7938	6.40868	1.08555	13.9491	0	1.87792	0.931775	3.23124	4.53122	3.92854	1.08787	8.69797	9.74499
ENSG00000171735.18	CAMTA1	4.24831	0.306634	2.45404	0.604644	4.05949	2.19418	1.02384	0.68826	1.86939	0	1.32873	2.2381	2.28939	0.729549	1.19168	3.11099	2.31654	6.50906	2.76145	0	1.26541	1.2852	0.994488	0.691177	2.07811	0.432484	1.78429	2.16218	2.84263	0.688534	1.37492	0.597308	1.30454	4.14793	1.03702	3.34731	2.85888	1.56036	4.10171	0	0.886738	0.999217	0.9364	1.54073	4.31968	0.947997	1.13508	4.24365
ENSG00000131236.16	CAP1	1.05406	0	0.988682	0	1.24858	0.435243	0.320729	0.506379	0.281873	2.3723	0	0.956843	1.03778	0.710598	0.316699	0.605658	1.78299	0.620888	0.972333	0.228857	1.428	0	0.276394	0.823132	0	0	0.297039	1.21453	0.947544	1.9383	0.838668	0.252936	1.28871	1.24638	0.527512	0.659234	3.14681	0.843034	2.3346	0	0	0.384632	0.502331	0.863982	3.10175	1.63181	0.951215	0.689619
ENSG00000162909.17	CAPN2	0.263777	0.406923	0.979966	0	0.401187	0	1.02384	1.1056	0.281873	1.67577	0	1.8426	0	1.25399	0	1.5435	0.791817	0.913069	0.808643	1.1682	0.976045	0.170444	1.89256	0	0	1.29745	0.894205	0.796633	2.38125	0.790744	0	0.298654	0.539305	4.03286	1.56983	0.216034	0.585486	1.25522	3.5496	0.364473	0	1.57399	0	2.26561	0.412543	0.911104	2.76896	0.585987
ENSG00000203697.11	CAPN8	0	0	0	0	0	0	0.255961	0	0	0	0	0	0	0	0	0	0	0.292181	0	0.552102	0	0	0	0	0	0	0	0	0	0	0	0	0	0.188509	0	0	0	0	0	0	0	0	0	0	0	0	0	0
ENSG00000116489.12	CAPZA1	3.44997	3.85432	5.36683	2.48704	1.51992	1.74097	1.92126	0.830878	4.24828	2.29038	5.50239	3.32306	2.11974	2.91542	2.08291	6.55417	4.81129	5.60825	9.07566	3.55953	4.53536	2.22293	1.56106	0	2.07811	3.34487	1.68602	2.17176	4.42769	2.18419	1.9226	1.45698	1.87175	4.70335	1.7478	3.93628	2.77548	5.16258	7.03765	2.55131	2.14199	7.21069	0	9.54139	6.36441	9.16392	4.17258	6.29899
ENSG00000077549.17	CAPZB	0.725083	0	0	0.673104	1.159	0.513773	0.216125	0	0	0	0.503213	0	0	0.878911	0.241586	0	0.263939	0	1.42728	0	0.786132	0	0	1.27225	0	0	1.18815	0.353169	0.297656	0.280616	0	0.429836	0.269653	0	0	0.582353	0.267418	0.50502	1.82337	0	0.725009	0	0	0	0.537499	0.758398	0	0.34481
ENSG00000132906.17	CASP9	0.270788	0	0.494341	0	0	0	0	0	0	0	0	0	0	0.168313	0.241586	0	0.70762	0	0	0	0	0.562004	0	0	0	0	0.298068	0	0	0	0	0	0	0.188509	0	0	0	0.520122	0	0	0	1.08508	0	0.384392	0	1.32118	0	0
ENSG00000130940.14	CASZ1	0	0	0	0	0.712794	0	0	0	0	0	0	0	0	0	0	0	0	0	0	0	0	0	0	0	0	0	0	0	0	0	0	0	0	0	0	0	0	0	0	0	0	0	0	0	0	0	0	0
ENSG00000154222.14	CC2D1B	0	0	0	0	0.311608	0	0	0	0	0	0	0	0	0	0	0	0	0	0	0	0	0.170444	0	0	0.692705	0.468839	0.594077	0.176584	0.352232	0	0	0	0	0	0	0	0	0	0	0	0	0	0	0	0	0.183584	0.276051	0
ENSG00000137944.17	CCBL2	0.805354	0	0.494341	0	0	0	0	0.22942	0	0	0	0	0	0.336626	0.483172	0	0.273746	0.422015	0	0	0	0	0	0	0	0.864969	0	0	0.297656	0	0.547682	0	0	0.523879	0	0	0	0	0	0	0	0	0	0	0	0.170753	0	0
ENSG00000159588.14	CCDC17	0	0	0	0	0	0	0	0	0	0	0	0	0	0	0	0	0	0	0	0	0	0	0	0	0	0	0	0	0	0	0	0	0	0	0	0	0	0	0	0	0	0	0	0	0	0	0	0
ENSG00000122483.17	CCDC18	6.89905	8.38739	4.74038	5.71564	9.86094	11.8336	4.1653	7.26973	26.2656	7.41428	7.25301	7.63778	2.18009	4.63648	32.0013	4.90481	8.61746	20.1926	12.0497	5.96704	5.36935	6.1379	4.82872	22.3589	2.66162	7.44478	4.86253	5.71547	13.2161	3.95954	5.25441	15.4613	7.52697	8.73596	9.53762	7.76784	4.72338	4.97914	7.94627	10.5226	5.45658	9.70021	6.53075	11.9769	8.74463	5.46503	4.97038	8.43557
ENSG00000117477.12	CCDC181	0	0	0	0	0	0	0	0	0	0	0	0	0	0	0	0	0	0	0	0	0	0	0	0	0	0	0	0	0	0	0	0	0	0	0	0	0	0	0.567498	0	0	0	0	0	0	0	0	0
ENSG00000186409.15	CCDC30	0.505471	0	0	0	0.448354	0	0	0	0.876596	0	0	0	0	0.168313	0	0.926268	0	0	0.228832	0	0	0	0	1.16851	0	0	1.49034	0	0	0	0	0	0	0	0	0	0	0	0	0	0	0.192316	0	1.05122	0	0	0	0.292993
ENSG00000221978.11	CCNL2	0	0	0	0	0.401187	0.606096	0	0	0	0	0	0	0.620102	0	0	0	0	0	0.582524	0	0	0	0	0	0	0	0	0	0	0	0	0	0	0	0	0	0	0	0	0	0	0	0	0	0	0	0	0
ENSG00000163468.14	CCT3	8.24703	4.76269	0.326655	0.604644	6.96259	7.84484	1.6504	2.62249	4.56957	1.75768	8.33757	3.39817	5.39653	6.32016	2.71715	1.29939	1.61306	8.71646	5.07965	0.481627	4.36157	1.66856	4.57897	3.18879	2.66162	6.16298	3.77249	7.88478	10.4528	2.76088	2.50457	7.75054	4.73091	3.94426	2.502	3.96967	12.6956	7.7281	6.54181	3.23685	7.93863	3.48576	2.11201	4.92553	11.4775	4.6938	2.76896	1.48297
ENSG00000134256.12	CD101	0	0	0	0	0	0	0	0	0	0	0	0	0	0	0	0	0	0	0	0	0	0	0	0	0	0	0	0	0	0	0	0	0	0	0	0	0.534836	0	0	0	0	0	0	0	0	0	0	0
ENSG00000117335.19	CD46	1.25264	1.02019	0.406021	0	5.18038	1.38304	0.255961	0.553919	1.18945	0	0.400444	0.722821	2.58637	4.58184	1.19252	1.47941	1.68899	0.422015	1.58284	0.552102	1.93461	1.08098	6.96323	0	1.27621	0.791825	1.19021	1.74027	1.84051	0.280616	1.09536	2.60588	0.225925	1.61328	0.257402	1.26385	0	0.550325	0.927074	0.364473	0.572065	0.278177	0	0.384392	0	1.42938	0	0
ENSG00000196352.15	CD55	0.263777	0	0	0	0.311608	0	0.969104	0.553919	0	0	0	0.559888	0	0	0	0.605658	0	0	1.81167	0	0	0.246697	0	0	0	1.07846	0	0	0.352232	0.280616	0	0.298654	0	0	0.810329	0.216034	0.292743	0	0	1.77895	0.28164	0	1.2559	1.79594	0.269605	0	0	0
ENSG00000116815.15	CD58	0	0	0	0	0.672531	0	0	0	0	0	0	0	0	0	0	0	0	0	0	0	0	0	0	0	0	0	0	0	0	0	0	0	0	0	0	0	0	0.844368	0	0	0	0	0	0	0	0	0	0
ENSG00000079335.19	CDC14A	1.06913	0.613268	0.406021	0	4.77014	5.21208	0.536854	0.414318	1.61715	0.629299	0.573911	0	0.285577	2.95388	1.28304	0.896909	7.23732	2.76348	1.26631	2.04481	2.77318	1.71159	0.994488	1.69952	0	0.468839	1.48725	0.443465	1.70658	2.3626	0.827238	0.252936	0.225925	0.450448	0.779616	0.432068	3.08942	1.20992	5.27054	0	0.572065	0	1.7241	2.07837	4.5713	2.71888	0	3.7794
ENSG00000117399.13	CDC20	0	0	0	1.34621	0.224177	0.388474	0	0	0	0	0	0	0	0	0	0	0	0.292181	0	0	0	0.187335	0	0	0	0	0	0.26688	0	0.229511	0	0	0	0	0	0	0	0.338014	0	0.364473	0.28164	0	0	0.384392	0.412543	0	0	0.34481
ENSG00000070831.15	CDC42	1.55953	1.78231	0.900362	0.604644	9.1572	2.88631	0.728047	2.76209	0.281873	0	0.903657	0.878836	0.631504	1.47528	2.08375	0	0.881688	0.620888	0.454952	0.457715	4.45339	1.70235	1.20891	2.23052	0.583509	0	2.87829	2.12302	2.15927	0.561233	1.98554	1.6642	0.539305	0.974327	1.02961	0.670366	2.24065	3.01413	5.3422	1.51835	0.290425	1.2866	0.4682	0.350407	1.88381	2.5369	0.989591	2.03505
ENSG00000143776.18	CDC42BPA	2.29968	3.75961	4.64311	3.76478	13.7075	7.04416	6.25282	2.9432	3.62258	1.17668	2.57613	5.96359	4.72085	21.3509	5.66048	6.30318	3.47198	5.08468	18.4135	1.79141	10.04	2.28229	6.16938	9.23925	3.02674	3.45393	7.24929	6.05265	6.02512	5.05163	1.93403	10.0821	3.81512	3.15314	4.17248	5.31388	4.07569	3.8585	22.499	1.59954	1.42577	6.09878	6.31364	2.91513	3.902	17.3724	3.99571	6.22917
ENSG00000197622.12	CDC42SE1	0	0	0	0	0	0	0	0	0	0	0	0	0.620102	0.168313	0	0	0	0	0	0	0	0	0	0	0	0	0	0	0	0	0	0	0	0	0	0	0	0.16834	0	0	0	0	0	0	0	0	0	0
ENSG00000097046.12	CDC7	0.270788	0	0	0	0	0.692129	0	0	0	0	0	0	0.285577	0	0	0	0	0.84403	0	0	0	0.187335	0.331496	0.399049	0.583509	0	0	0	0.595312	0	0	0.429836	0	0	0	0	0	0	0.359576	1.77895	0	0	0	0	0.269605	0	0	0.603991
ENSG00000134371.11	CDC73	0.241694	6.47057	0.900362	1.20929	11.1026	2.16871	0.969104	1.15012	1.86939	0.581	1.66176	1.67966	3.48064	2.91709	2.39961	5.79785	2.61404	5.81913	4.38583	1.49207	3.65741	6.3028	0.276394	4.51111	0	0.901323	6.84955	3.8649	1.94966	1.64805	2.54465	1.78595	1.68955	2.33578	2.76681	2.4209	4.39376	1.86818	13.7258	0.364473	1.1617	3.45813	0.97053	7.32032	2.16626	1.42256	3.3365	1.00062
ENSG00000134690.10	CDCA8	0.263777	0	0	0	0	0	0	0	0	0	0	0.481881	0.285577	0	0	0	0	0.422015	0	0.252769	0	0	0	0	0	0	0.594077	0	1.00212	0	1.11822	0	0	0	0	0	0.267418	0.16834	1.97503	0	0	0	0.285371	0	0	0.52509	0	0
ENSG00000008128.22	CDK11A	0	0	0	0	0	0	0	0	0	0	0	0	0	0.374527	0	0	0	0	0	0	0	0	0	0	0	0	0	0	0	0	0	0.429836	0	0	0	0	0	0	0	0	0	0	0	0	0	0.341506	0	0
ENSG00000248333.8	CDK11B	0.483388	0	0	0	0	0	0	0	0	0	0	0	0.620102	0	0.241586	0	0.263939	0	0	0	0	0	0	0	0	0.755471	0.298068	0	0	0	0.279556	0	0	0	0	0	0	0	0.359576	0	0	0	0	0	0.269605	0	0	0
ENSG00000117266.15	CDK18	0	0	0	0	0	0	0	0	0	0	0	0	0	0	0	0	0	0	0	0	0	0	0	0	0	0	0	0	0	0	0	0	0	0	0	0	0	0	0	0	0	0	0	0.700813	0	0	0	0
ENSG00000143126.7	CELSR2	0	0	0	0	0	0	0	0	0	0	0	0	0	0.187263	0.559125	0	0.273746	0	0	0	0	0	0	0	0	0	0	0	0	0	0	0	0	0	0	0	0	0	0	0	0	0	0	0	0	0	0	0
ENSG00000117724.12	CENPF	0.263777	2.39557	1.62409	1.27775	0.401187	3.82661	0.255961	0.22942	0.548928	2.80415	1.47757	1.31753	0.285577	1.06507	0.79987	1.52035	0.35381	2.34146	2.11649	0.276051	0.731482	0.170444	0	0.716212	0.692705	0	2.67968	1.06351	0.649888	4.12249	0	0	0.495578	1.08941	0.509506	1.42075	2.68795	0.67336	4.71009	0.364473	0.572065	0	0.4682	1.02715	3.11973	0.721505	0.912839	0.292993
ENSG00000120334.15	CENPL	0	0	0	0	0	0.217621	0	0	0	0	0	0	0	0	0	0	0	0	0	0	0.234719	0	0	0	0	0	0	0.353169	0	0	0	0	0	0	0.514804	0.355187	0	0.183442	0	0	0	0	0.4682	0	0	0	0	0
ENSG00000116198.12	CEP104	0.263777	0.343846	0	0	0	0	0	0	0	0	0	0	0	0.560681	0	0	0.617749	1.20525	0.686496	0	0	0.740091	0.331496	0	0	0	0	0.176584	0	0	0	0	0	0.261939	0.54022	0	0	0	0.344189	0	0	0	0	0	0	0.720705	0.567539	0
ENSG00000143702.15	CEP170	0.747165	2.59057	1.55367	2.48704	5.80574	3.8404	0	0.873158	0	1.09477	2.19704	2.28129	0.691854	0	0.558285	1.47941	0.70762	0	0.681071	1.1042	1.50013	3.04796	0.621676	3.16057	1.38541	0.322986	3.87298	1.27525	5.97925	2.31149	0.827238	0.551589	1.10652	0.565528	0.527512	1.87508	0.267418	2.07072	3.6652	0.728946	0.290425	0	3.04826	0.768784	3.38591	0.52509	2.34691	3.81321
ENSG00000135837.15	CEP350	4.35663	7.1123	6.95608	4.30097	11.4237	6.6707	6.88522	7.961	7.99785	2.18953	2.73888	6.07094	12.2485	8.6247	4.37576	11.6568	7.75952	14.0973	35.4211	3.23566	13.5348	4.06958	7.59869	15.1073	7.65728	5.65822	9.13716	6.72784	7.03092	9.24215	3.6228	9.57075	2.8956	10.8885	13.5469	5.61445	5.80269	6.44267	23.9421	12.6	6.0441	12.81	6.56488	11.4697	3.64096	9.69503	5.92108	8.80498
ENSG00000130695.14	CEP85	5.63239	7.15826	5.28747	2.5555	4.06425	3.33535	3.01192	1.93647	6.38338	1.75768	9.87184	3.48599	2.57496	8.2123	6.7608	3.25158	6.31072	11.1189	14.2006	0.552102	10.0749	9.62199	3.85489	6.2957	3.71945	7.34078	11.6136	3.29599	14.3645	12.9871	3.34324	6.25381	5.07593	7.79366	4.41818	8.05623	6.49209	6.58614	12.6625	2.64955	10.9057	9.90391	0.856112	11.545	11.7111	15.7225	4.60214	7.69404
ENSG00000134255.13	CEPT1	0.98886	0.65048	0	1.34621	2.00854	1.97656	0.320729	0.45884	2.74598	0	1.08784	1.7214	0.905678	2.52472	1.35816	1.59064	3.64037	2.14259	3.79621	1.21539	1.91492	0	3.34342	1.80644	2.07811	0	2.08457	1.24968	1.82814	3.93445	1.39778	0.850243	0.225925	1.08941	0.257402	3.32157	1.32553	2.98526	1.72094	0	1.85157	2.65123	1.4046	2.82309	6.0931	1.84707	0	1.86159
ENSG00000143418.19	CERS2	0	0	0	0	0	0	0	0	0	0	0	0	0	0	1.11825	0	0.35381	0	0	0	0	0.851173	0	0	0	0	0	0.504184	0	0.561233	0	0	0	0	0	0	0	0.33668	0.927074	0	0	0	0	0	0.412543	0	0.329864	0
ENSG00000213085.9	CFAP45	0	0	0.406021	0	0	0	0	0	0	0	0	0	0	0	0	0	0	0.292181	0.291262	0	0.234719	0	0	0.424084	0	0	0	0.3276	0.297656	0	0	0	0	0	0	0.355187	0	0.16834	0.344189	0	0	0	0	0	0	0	0	0
ENSG00000243710.7	CFAP57	0	0	0	0	0	0	0	0	0	0	0.251606	0	0	0	0	0	0.547492	0	0.291262	0	0.234719	0.187335	0	0	0	0	0	0	0	0	0	0	0	0	0	0.216034	0	0	0.359576	0	0	0	0	0	0.682148	0	0	0
ENSG00000142609.18	CFAP74	0	0	0	0	0	0	0	0	0	0	0	0.24094	0	0	0	0	0	0	0	0	0	0	0	0	0	0	0	0	0	0	0	0	0	0	0	0	0	0	0	0.506118	0	0	0	0	0	0	0	0
ENSG00000000971.15	CFH	0	0.306634	0	0	0	0	0	0	0	0	0	0.318948	0	0	0	0.605658	0	0	0	0.228857	0	0.374669	0	0	0	0.432484	0	0.504184	0	0	0	0.72849	0	0	0	0.670366	0	0	0	0	0	0	0	0	0	0	0	0
ENSG00000116785.13	CFHR3	0	0	0	0	0	0	0	0	0	0	0	0	0	0	0	0	0	0	0	0	0	0	0	0	0	0	0	0	0	0	0	0.298654	0	0	0	0	0	0	0	0	0	0	0	0	0	0	0	0
ENSG00000143375.14	CGN	0.270788	0	0	0	0.623215	0	0.648374	0.828636	1.37973	0	0	0	0.620102	0.934654	0.316699	0	1.58931	0	1.84883	0.528821	0	0.246697	0.310838	0.584256	0	0	0	0	0	0	0	0	0	0	0	0	0	0.718665	0	0	1.12656	0.278177	0	0	0	4.48897	0.329864	0.34481
ENSG00000226067.6	CH17-118O6.2	0	0	0	0	0	0	0	0	0	0	0	0	0	0	0	0	0	0	0	0	0	0.170444	0	0	0	0	0	0	0	0	0	0	0	0	0	0	0.292743	0	0	0	0	0	0	0	0	0	0	0
ENSG00000285215.1	CH17-118O6.7	0	0	0	0	0	0	0	0	0	0	0.800889	0	0	0	0	0	0	0	0	0	0	0	0	0	0	0	0	0	0	0	0	0	0	0	0	0	0.447303	0	0	0	0	0	0	0	0	0	0	0
ENSG00000274642.1	CH17-472G23.1	0.798342	0	0	0	0	0	0	0	0	0	0	0	0	0	0	0	0	0	0	0	0	0	0	0	0	0	0	0	0.297656	0	0	0	0	0	0	0	0	0	0	0	0	0	0	0	0	0	0	0.689619
ENSG00000275131.2	CH17-472G23.4	0.241694	0	1.14765	1.20929	0.401187	0	0	0	0	0	0	0.318948	0	0	1.11825	0.332188	1.08518	0.292181	1.56028	0	0.958564	0.170444	0	0.584256	0	0.432484	0.298068	0	0	0	0	0	0	0	0	0	0	0.521456	0.688377	0	0	0.556353	0	0	0.269605	0	0	0
ENSG00000131778.18	CHD1L	2.3428	5.18115	3.43376	2.62396	4.24126	6.42935	4.37139	1.47462	2.41831	6.05149	5.63404	3.40107	5.14993	2.41159	6.3844	4.5904	24.8663	4.42727	30.0736	1.33369	4.55505	9.3666	3.30897	4.48608	2.07811	6.12112	5.55385	6.19408	13.1528	5.22568	4.952	3.14206	11.1757	6.38501	4.61946	3.53447	3.1263	5.16258	5.86353	0.728946	8.52502	13.9086	1.14148	4.16666	8.00003	8.77315	4.24183	3.39858
ENSG00000116254.17	CHD5	0	0	0	0	0	0	0	0	0	0	0	0	0	0	0	0	0	0	0.22612	0.828154	0	0	0	0	0	0	0	0	0	0	0	0	0	0	0	0	0	0.520122	0	0	0	0	0	0	0	0	0	0
ENSG00000134216.18	CHIA	0	0	0	0	0	0	0	0	0	0	0	0	0	0	0	0	0	0	0	0	0	0.340888	0	0	0	0	0	0	0	0	0	0	0	0	0	0	0	0	0	0	0	0	0	0	0	0	0	0
ENSG00000133019.11	CHRM3	0	0	0	0	0	0.256886	0	0	0	0	0	0.24094	1.2402	0	0	0	0	0	0	0	0	0.187335	0.331496	0	0	0	0	0	0	0	0	0.298654	0	0	0	0.216034	0	0	0	0	0	0	0	0	0.412543	0	0	0
ENSG00000160679.12	CHTOP	0	0	0	0	0	0	0	0.22942	0	0	0	0	0	0	0.241586	0	0.273746	0	0.228832	0	0	0	0	0	0	0	0	0	0	0	0	0	0	0	0	0	0	0.338014	0	0	0	0	0	0	0.535787	0	0	0
ENSG00000159208.15	CIART	0	0	0	0	0	0	0	0	0	0	0	0	0	0	0	0	0	0	0	0	0	0	0	0	0	0	0	0	0	0	0	0	0	0	0	0	0	0.338014	0	0	0	0	0	0	0	0	0	0
ENSG00000121940.15	CLCC1	0	0	0.326655	0.673104	0.311608	0	0	0	0	0	0.251606	0	0.285577	0	0.559125	0.332188	0.35381	0	1.32602	0	0	0	0	0	0	0	0.891116	0	0	0.479757	0.547682	0.298654	0	1.49821	1.02961	0	0.852904	0.183442	0.359576	0	0	0.268967	0	0	1.3446	0.367168	0	0
ENSG00000011021.21	CLCN6	0.512483	0	0	0	0	0.256886	0	0	0	1.2586	0	0	0	0	0	0	0.821239	0	0	0.457715	0	0	0.331496	0.292128	0	0	0.594077	0	0.352232	0	0	0	0	0	0	0	0	0	0.344189	0	0	0	0	0	0	0	0	0
ENSG00000169504.14	CLIC4	0	0.306634	0.326655	0	0	0.388474	0.216125	0	0	1.12838	0	0.481881	0	0	0.241586	0	0.537685	0	0	0.252769	0	0.374669	0	0	0.583509	0.322986	0	0.3276	0	0.250246	0	0	0.341285	0.261939	0	0	0	0	0.703765	0	0	0	0	0	1.22136	0	0.329864	0.34481
ENSG00000176444.18	CLK2	0	0.306634	0	0	1.56234	1.76523	0	0	0.281873	0	0	1.11978	0.631504	0	0.558285	0	0.527878	0.422015	0	0.252769	0	0.434032	0.552789	1.56438	0	1.07846	0	0.353169	0.947544	0	0	0.981426	0.539305	0.261939	0.736195	0.216034	0	0.674694	0	0.506118	0.443369	0.268967	0	0	4.72709	0	0.951215	0.310998
ENSG00000092853.13	CLSPN	1.47225	1.32683	0.820996	1.20929	0	0.909751	0	0	2.44795	0.581	2.96258	0.800829	0.285577	0.74739	1.19168	0.926268	2.03299	0.876544	4.02775	1.21539	1.92477	2.10315	0.621676	2.28737	1.96892	1.97978	0.595107	0.353169	0.947544	0.229511	1.65448	0	1.44301	2.0322	0.239396	3.68475	2.86783	1.01271	1.73633	0.364473	1.12656	0.999217	0	1.05122	5.11823	1.82221	0.329864	0.966805
ENSG00000171603.16	CLSTN1	0.270788	0	0.326655	0	0.448354	0.388474	0	0.22942	0	0	0.251606	0	0	0.560681	0.241586	0	0.35381	0	0	0.228857	0.714001	0	0	0.292128	0.583509	0	0.79387	0.176584	0	0	0	0	0.225925	0.565528	0	0.582353	0.267418	0	0.344189	0	0.28164	0.816111	0	1.05122	1.48754	0.189599	1.72556	0
ENSG00000162368.13	CMPK1	1.53745	0.65048	0.494341	0.604644	4.77919	0	0.320729	0.968237	4.67464	0	0	2.08354	1.19126	1.28968	3.27712	3.06385	0.537685	1.68806	3.30952	1.26322	1.95209	1.03851	0.898071	0.584256	0	0.322986	2.08442	0.882921	4.00848	0.709268	0.559112	3.10232	0.341285	2.82307	2.03802	1.55677	1.03279	3.80076	4.95185	0.506118	3.32794	3.33326	0.502331	2.30635	3.53227	2.99784	0.291488	2.31223
ENSG00000143786.7	CNIH3	0.241694	0	0.326655	1.81393	0.224177	3.10901	0	0	0	0	1.07712	0.800829	0	0	0	0.582502	0.263939	0	0.686496	5.49252	0	0	0.621676	0	0	0	1.19227	0	28.0618	0	0	0	0.341285	0	0	0	0	0.33668	0.567498	0	0	0	0.570742	0	2.02333	0.734336	0	7.05634
ENSG00000143771.11	CNIH4	1.04004	0.957114	0.326655	0	0.224177	1.91182	1.30474	0	1.14365	0	0.286956	0.559888	1.19126	0.374527	0	0.885331	0	0.422015	1.36214	0	3.96867	0.340888	1.47152	0.399049	0.692705	0.322986	4.06969	0.59448	1.54286	0.811479	0.559112	0.72849	1.9871	2.11574	0.239396	0.798387	1.095	0.183442	1.25588	0	0.886738	0	0	0.768784	2.85355	2.38419	0.659727	1.00062
ENSG00000142675.17	CNKSR1	0	0	0	0	0	0	0	0	0	0	0	0	0	0	0.559125	0	0.35381	0	0	0	0	0.187335	0	0	0	0.432484	0	0	0	0	0	0	0	0	0	0	0	0	0	0.506118	0	0.83453	0	0	0	0	0.291488	0
ENSG00000117519.15	CNN3	0	0	0.406021	0	0	0	0	0	0	0	0.251606	0	0	0.373418	0	0	0	0	0	0	0	0	0	0	0	0	0	0	0	0.500492	0	0.252936	0	0	0	0	0	0	0	0	0	0.192316	0	0	0	0	0.276051	0
ENSG00000162852.13	CNST	2.29968	0	0	0.604644	1.29575	0.949016	0.57669	0.414318	2.16608	0.547384	1.19061	3.35933	0	0	0.241586	1.53813	1.05576	1.66379	4.404	0.228857	2.21413	3.34533	3.3572	0.399049	1.27621	0	1.19021	1.42626	0.561837	0.229511	0	0.505871	0.808958	0	1.01901	0.454332	0.560161	0	2.93288	0.506118	0.84492	1.31641	1.00466	1.79594	2.17311	2.92893	0	0.310998
ENSG00000135775.13	COG2	2.32177	1.87702	1.63304	2.5555	7.77402	0.988281	2.41828	1.332	1.94482	0.547384	0.286956	2.75625	8.46569	1.85036	2.39961	1.20594	1.50924	6.20864	3.40807	0.252769	2.94562	0.621366	2.11385	0.823132	0.692705	1.29745	2.48092	1.74829	3.84475	1.46001	0.559112	1.36554	0.539305	1.84874	1.251	2.80496	0	1.23879	2.09591	1.09342	4.44572	1.38385	1.7241	2.30635	1.07671	8.92981	0.276051	4.05658
ENSG00000060718.21	COL11A1	0	0	0	0	0	0	0	0	0	0.547384	0	0	0	0	0	0	0	0	0	0	0	0	0	0	0	0	0	0	0	0	0	0	0	0	0	0	0	0	0	0.506118	0	0	0.4682	0	0	0	0	0
ENSG00000084636.17	COL16A1	0	0	0	0	0	0	0	0	0	0	0	0	0	0	0	0	0	0	0	0	0	0	0	0	0	0	0	0	0	0	0	0	0	0	0	0	0	0	0.344189	0	0	0	0	0	0	0	0	0
ENSG00000171502.14	COL24A1	0	0	0	0	0	0	0	1.24295	0.281873	0	0	0	1.8603	0	0.724757	0.302829	0	0.292181	0.811356	0	0	0.528223	0	0	0	0.755471	0.496832	0.59448	0.297656	0	0	0.551589	0	0	0.27011	0.432068	3.27343	0	0	0	0	0	0	0	1.075	0	0	1.03443
ENSG00000198756.10	COLGALT2	0	0	0	0	0	0	0	0	0	0	0	0	0	0	0	0	0	0	0	0	0	0	0	0.424084	0	0	0	0	0	0	0	0	0	0	0	0	0	0	0	0	0	0	0	0	0	0	0	0
ENSG00000122218.14	COPA	1.28874	1.5274	1.95969	0.673104	3.66521	4.36289	2.37737	2.67003	2.21187	4.56183	2.08355	1.75767	7.73629	2.31906	1.11657	7.48044	2.4808	4.15534	2.75873	1.01045	1.92477	3.55929	1.72725	5.09537	0.583509	5.42864	3.27788	3.43987	2.95178	3.17989	3.05225	1.4873	1.64582	2.06373	4.4733	3.34731	8.76701	8.70084	3.83224	0	1.14413	1.90256	2.37513	2.42878	2.04302	5.65496	2.12467	1.48297
ENSG00000157184.6	CPT2	0	0	0	0	0	0.256886	0	0	0	0	0	0	0	0	0	0.302829	0	0	0	0	0.234719	0.187335	0	0	0	0	0	0	0	0	0	0	0	0.188509	0.509506	0	0	0.520122	0	0	0	0	0	0	0	0	0	0
ENSG00000203710.11	CR1	0	0	0	0	0	0	0.320729	0	0	0	0	0	0	0	0	0	0	0	0	0	0	0	0	0	0	0	0	0	0	0	0	0	0	0	0	0	0	0	0	0	0	0	0	0.513576	0	0	0	0
ENSG00000134376.15	CRB1	0	0	0	0	0	0	0	0	0	0	0	0	0	0	0	0	0	0	0.22612	0	0	0	0	0	0	0	0	0	0	0	0	0	0	0	0	0	0	0	0	0	0	0	0	0	0	0.170753	0	0
ENSG00000143162.7	CREG1	0	0	0	0	0	0	0	0	0	0	0	0	0	0	0	0	0	0	0	0	0	0	0.60789	0	0	0	0	0	0	0	0	1.28951	0	0	0	0	0	0	0.567498	0	0.56328	0	0	0	0	0.189599	0	0
ENSG00000058453.16	CROCC	0	0	0	0	0	0	0	0	0	0	0	0	0	0	0	0	0	0	0	0	0.479282	0	0	0	0	0	0.595107	0	0.595312	0	0	0	0	0	0	0	0	0	0	0	0	0	0	0	1.21965	0	0	0
ENSG00000215908.10	CROCCP2	0.270788	0	0	0	0	0.902247	0	0	0.594723	0	0	0	0	0.187263	0.241586	0	0.263939	0	0.291262	0.276051	0	0.170444	0	0	0	0	0.297039	0	0.352232	0	0	0	0.269653	0.785818	0	0.216034	0	0.16834	1.49457	0	0.290425	0.278177	0	0	2.15171	0	0	0
ENSG00000080947.14	CROCCP3	0	0.306634	0	0.673104	0	0	0	0	0	0	0.251606	0	0	0	0.241586	0	0	0	0	0	0	0.663838	0	0	0	0	1.98733	0	0.914069	0.229511	1.10679	0	0	0.340425	0.239396	0	0	0	0	0	0	0	0	0.513576	0.269605	0.367168	0	0
ENSG00000160741.16	CRTC2	0	0	0	0	0	0.770659	0	0	0	0	0	0	0	0	0	0	0	0	0.22612	0	0	0	0	0	0	0	0	0.176584	0	0	0	0	0	0	0	0	0	0	0	0	0	0	0	0	0	0	0	0
ENSG00000176092.15	CRYBG2	0	0	0	0	0	0	0.255961	0	0	0	0	0	0	0.933544	0	0	0	0	0	0	0	0	0	0	0	0	0	0	0	0	0	0	0	0	0	0	0	0	0	0	0	0.192316	0	0.384392	0	0.189599	0	0
ENSG00000116791.13	CRYZ	0.263777	0	0	0	0	0	0	0	0	0	0	0	0	0	0	0	0	0	0.291262	0	0	0	0	0	0	0	0	0	0	0	0	0.298654	0	0	0	0	0	0	0	0	0	0	0	0.513576	0	0	0	0
ENSG00000009307.15	CSDE1	0.270788	0.713557	2.52469	0	0.535785	1.38426	1.22506	0	0.815984	1.7913	1.33945	2.1601	1.47683	1.96404	3.03553	4.76035	2.30106	1.29856	3.43709	1.00982	2.856	1.37071	0.331496	0	1.27621	0.432484	0	1.54213	0.297656	1.26087	1.39778	0.252936	1.06279	3.46733	1.06773	0.582353	1.9896	1.36582	4.06787	2.87237	1.1617	0.940985	2.94572	0.700813	6.51077	3.0672	1.7873	0.914989
ENSG00000184371.13	CSF1	0	0	0	0	0	0	0	0	0	0	0	0	0	0	0	0	0	0	0	0	0	0.246697	0	0	0	0	0	0	0	0.250246	0	0	0	0	0	0	0	0	0	0	0	0	0	0	0	0	0	0
ENSG00000121904.17	CSMD2	0	0	0	0	0	0	0	0	0	0	0	0	0.917081	0	0	0	0	0	0	0	0	0	0	0	0	0	0	0	0	0	0	0	0	0	0	0	0	0	0	0	0	0	0	0	0	0	0	0
ENSG00000159176.13	CSRP1	0	0	0	0	0	0	0	0	0.281873	0.629299	0	0	0	0	0	0	0	0	0	0	0	0	0.662992	0	0	0	0.298068	0.655199	0	0	0	0	0	0	0	0.648101	0	0	0	0	0	0	0	0	0	0.189599	0	0
ENSG00000117151.12	CTBS	0	0	0	0.673104	0	0	0	0	0	0	0	0.438693	0	0	0	0	0	0	0	0	0	0	0	0	0	0	0	0	0	0	0	0	0.269653	0	0	0	0	0	0	0	0	0	0	0	0	0	0	0
ENSG00000116761.11	CTH	0	0	0	0.604644	0	0	0	0	0	0	0	0	0.631504	0	0	0	0	0	0	0	0	0	0	0	0	0.901323	0	0	0	0.250246	0.547682	0.551589	0.88059	0.188509	0	0.454332	0.267418	0	0	0	0.443369	0	0	2.01716	1.07671	0	0	0
ENSG00000178585.14	CTNNBIP1	1.05406	1.80817	0	0	0	0.217621	0.216125	0.873158	1.61715	0	0.652051	1.23952	0	2.69359	0.724757	0	2.29693	5.19825	2.13467	2.15473	2.7557	0.187335	0.898071	3.4527	0	0	1.19021	1.18495	0.352232	0	0.559112	0.252936	0.269653	1.80709	2.85154	0.864135	1.68048	0.520122	7.58976	0.506118	0.290425	1.12409	1.00466	1.76195	0.537499	1.46026	2.6459	2.46558
ENSG00000171793.13	CTPS1	1.28173	2.9975	1.71264	1.27775	0.401187	0.870486	1.02384	0	2.79044	0	2.6789	6.00131	0.285577	0	0.559125	2.79658	6.76835	0.584363	0.678359	0.228857	0.731482	5.23557	1.24335	1.67448	2.66162	0.322986	0.595107	1.76985	2.99766	1.50001	0	0.597308	0.721503	1.39324	0.27011	2.70373	7.80124	1.36316	1.64623	0.506118	1.45002	2.14173	2.62637	0.384392	3.76249	0.556767	0.276051	1.31161
ENSG00000162438.11	CTRC	0	0	0	0	0	0	0	0	0	0	0	0	0	0	0	0	0	0	0	0	0	0	0	0	0	0	0	0	0	0	0.279556	0	0	0	0	0	0	0	0	0	0	0	0	0	0	0	0	0
ENSG00000143387.12	CTSK	0	0	0	0	0	0	0	0	0	0	0	0	0	0	0	0	0	0	0	0	0	0	0	0	0	0	0	0	0	0	0	0	0	0	0.478793	0	0	0	0.344189	0	0	0	0	0	0	0	0	0
ENSG00000163131.10	CTSS	0	0	0	0	0	0	0	0	0	0	0	0	0	0.187263	0	0	0	0	0	0	0	0.170444	0	0	0	0	0	0	0	0	0	0	0	0	0	0	0	0	0	0	0	0	0	0	0.267894	0	0	0
ENSG00000143079.14	CTTNBP2NL	0	0	0	0	0.224177	0.217621	0	0	0	0	0	0	1.38371	0.336626	0	0	0	0	0	0	0	0.246697	0	0	0	0	0	0.176584	0.595312	0	0	0	0	0	0.54022	0	0	0	0.567498	0.364473	0	0	0	0	0.269605	0.170753	0	0.292993
ENSG00000174151.14	CYB561D1	0	0	0	0	0	0	0	0.414318	0	0	0	0	0	0	0	0	0	0	0	0	0	0	0	0	0	0	0	0	0	0	0	0	0	0	0	0	0	0	0	0	0	0	0	0	0	0	0	0
ENSG00000159348.12	CYB5R1	0	0	0	0	0	0	0	0	0	0	0.251606	0	0	0	0	0	0.273746	0	0	0	0	0	0.552789	0	0	0	0	0	0	0	0	0	0	0	0	0	0.267418	0	0	0	0	0	0	0	0	0.183584	0	0
ENSG00000215883.10	CYB5RL	0	0	0	0	0	0	0	0	0	0	0	0	0	0	0	0	0	0	0	0	0	0	0	0	0	0	0.298068	0	0	0	0	0	0	0	0	0	0	0	0	0	0	0	0	0	0	0	0	0
ENSG00000134716.9	CYP2J2	0	0	0	0	0	0	0	0	0	0	0	0	0	0	0	0	0	0.876544	0	0	0	0	0	0	0	0	0	0.3276	0.947544	0	0	0	0	0	0	0	0	0	0	0	0.290425	0.961579	0	0	0	0.740351	0	0
ENSG00000142973.13	CYP4B1	0	0	0	0	0	0	0.216125	0	0	0	0	0	0	0	0	0	0.263939	0	0	0	0	0	0	0	0	0	0	0	0	0	0	0	0	0	0	0	0	0	0	0	0	0.961579	0	0	0	0.354337	0	0
ENSG00000142871.16	CYR61	0	0	0	0	0	0.474508	0	0	0	0	0	0	0	0	0	0	0	0	0	0	0	0	0	0	0	0	0	0.3276	0	0	0	0	0	0	0	0	0	0	0	0	0	0	0	0	0	0	0	0
ENSG00000173406.15	DAB1	0.263777	0	0	0	0	0	0	0	0.281873	0	0	0	0	0.374527	0	0	0	0	0	0	0	0	0.331496	0	0	0	0	0	0	0.250246	0	0	0	0	0.239396	0.432068	0	0	0	0	0	0	0	0	0.53921	0	0.291488	0
ENSG00000132676.15	DAP3	6.504	4.29846	1.55367	5.64718	2.44999	3.67827	0.255961	3.13336	3.79805	3.06458	6.43812	3.52226	1.25161	2.87974	3.11148	5.14892	1.60325	3.93621	7.43958	3.62164	3.66946	4.044	5.30487	3.58466	1.85972	6.12198	1.98511	3.96317	11.8865	1.01062	3.6228	1.4873	11.0252	7.53148	2.76151	6.24481	11.5082	7.27727	3.74213	4.39073	5.29274	9.80529	1.43873	5.73145	15.8075	7.6528	5.93652	3.74119
ENSG00000117593.9	DARS2	0	0.957114	0	0	0	1.55511	0.255961	0	0.594723	0	0.974356	0.24094	1.2402	0.523335	0	0.291251	0.627556	0	2.43407	0.228857	0.714001	0.528223	0.310838	1.27225	0	0	0.298068	0.3276	0.892968	0.500492	0	0	0	0	1.31984	0.355187	0.447303	0.858136	1.42292	1.77895	0.28164	0	0.502331	0.897968	0.269605	0.683013	0.621351	0
ENSG00000137992.14	DBT	0	0.306634	0	0	0.224177	0	0.864499	0	0	0	0	0	0.345927	0	0.558285	0	0	0.292181	0	0	0	0	0	0	0	0	0	0	0	0	0	0.551589	0	0	0	0	0	0	0	0	0.56328	0	0	0.350407	0	0.52509	0	0.292993
ENSG00000143164.15	DCAF6	8.32626	7.78865	4.57246	8.80732	22.342	10.5228	1.65731	1.74933	3.97988	1.162	6.44884	1.76459	2.38251	2.89922	3.92508	7.08953	3.91979	12.7502	8.01021	4.47496	9.62298	4.64952	5.92738	6.00039	3.13594	1.87028	5.05908	6.01506	5.50916	4.26089	3.6228	14.6379	3.38638	3.83399	2.77952	8.31018	7.8724	1.74381	18.4157	0.728946	4.00445	1.50872	9.63569	2.62593	5.26801	7.62273	2.16304	8.85021
ENSG00000132716.18	DCAF8	2.13125	1.78231	0	0	2.22796	0.902247	0	0.643738	1.06822	0.581	2.54725	1.2047	0.345927	0.336626	2.86738	2.49913	0.617749	1.72057	2.90886	0	0	0.868064	1.50596	1.56438	0	0.755471	0.297039	0	0.297656	1.44891	0.547682	0.505871	1.01906	0.717444	0.754201	2.06885	1.36242	1.17838	1.27126	1.09342	2.59625	2.15094	0	1.21439	2.1714	0.543937	4.34152	1.03443
ENSG00000118655.4	DCLRE1B	0.270788	0	0	0.604644	0	0	0.216125	0	1.40937	0	0	0.24094	0	0.523889	0.633398	0.955627	0.35381	0.292181	0	0	0.262044	0.246697	0	0	0	0	0	0	0	0	0	0	0	0	0	0	0	0.366884	0.688377	0	0	0.278177	0	0.384392	0.53921	0.183584	0	0
ENSG00000163357.10	DCST1	0	0	0	0	0	0	0	0	0	0	0	0.318948	0	0	0	0	0	0	0	0	0	0	0	0	0	0	0	0	0	0	0	0	0.225925	0	0	0	0.292743	0	0	0	0	0	0	0.513576	0	0	0	0
ENSG00000163354.14	DCST2	0	0	0	0	0	0	0	0	1.18945	0	0	0	0	0.186709	0	0	0.263939	0	0	0	0	0	0	0	0	0	0	0	0	0	0	0	0.341285	0	0	0	0	0	0	0	0	0	0	0	0	0.170753	0	0
ENSG00000153904.19	DDAH1	0.263777	1.0574	1.05933	0	4.73417	0.435243	1.08062	0.414318	2.71501	2.25677	2.12962	0	0	1.62686	0.875824	0.59408	2.15642	1.42839	0.22612	1.46879	1.02085	1.43007	0	2.70786	0	0	2.08648	0.26688	1.2452	1.53038	1.67734	1.01174	0.682569	1.31956	0.27011	0.4432	5.0921	0.366884	7.23018	0.728946	0	0.278177	0	7.52739	2.95196	6.50238	0.291488	0.914989
ENSG00000197312.11	DDI2	3.08296	3.03471	1.88033	1.27775	1.33601	2.50413	0.969104	2.99151	4.03546	0	1.87801	1.48046	2.09693	4.20732	1.2668	1.63158	4.07424	4.13107	7.90081	1.97244	10.1099	1.90762	3.10834	1.69633	1.16702	0.432484	2.47989	2.42906	3.49252	1.2705	1.37492	1.26468	3.5844	3.1216	1.5084	1.81281	3.57361	5.07952	6.98842	0.506118	5.90662	6.54085	1.4046	2.81993	3.36793	10.0001	2.30853	1.2778
ENSG00000244038.9	DDOST	0	0	0	0	0	0	0	0	0	0	0	0	0	0.187263	0	0	0	0	0	0	0	0	0	0	0	0	0	0	0	0	0	0	0	0	0	0	0	0.16834	0	0	0	0	0	0	0	0	0	0
ENSG00000064703.11	DDX20	0	0	0.326655	0	0	0	0	0	0	0	0	0	0	0.186709	0.241586	0	0	0	0	0	0	0	0	0	0	0	0	0	0	0	0	0	0	0	0	0	0.447303	0	0	0	0	0	0.285371	0	0.269605	0	0	0
ENSG00000118197.13	DDX59	0.541577	0.343846	0	3.2286	0	0.388474	0.432249	0.22942	0.876596	0	0	0	1.8603	0	0	0.332188	0	0.913069	0.904479	0	0	1.68601	0.60789	0.848167	0	0.468839	0	0.176584	0.297656	0	0.559112	0.505871	0	0.528934	0	0	0	0	1.40753	0	0.56328	0.268967	0.570742	0	1.34118	0.872612	0.276051	0.34481
ENSG00000158796.16	DEDD	0	0	0	0	0	0	0	0	0	0	0.251606	0	0	0	0	0	0	0	0	0	0	0	0	0	0	0	0	0	0.352232	0	0	0	0	0	0	0	0.292743	0	0	0	0	0	0	0	0.535787	0.354337	0	0
ENSG00000143753.12	DEGS1	0	0.687692	0	0	0	0.388474	0	0	0	0.547384	0	0	0	0	0	0	0	0	1.26631	0	0.524088	0	0	0	0.692705	0	0	0	0	0	0	0	0	0.565528	0	0.355187	0	0.16834	0	0	0.443369	0	0	0.863982	0.53921	0	0	0
ENSG00000213047.12	DENND1B	6.0115	3.03471	0	1.95085	14.2342	1.25896	3.47709	3.77787	4.4224	2.85245	1.3041	1.23952	4.65053	6.26333	3.36764	9.00079	1.69312	8.39198	17.0164	2.50189	4.67283	1.6092	5.89985	1.09023	1.27621	0.937678	2.67747	4.41622	3.5682	3.61383	1.11822	5.29125	1.82802	7.68339	3.37587	2.3729	4.50662	1.53016	12.557	0.364473	2.58747	4.0741	3.69944	5.90562	1.07842	3.94743	2.14761	1.91561
ENSG00000175984.14	DENND2C	0	0	0	0	0	0	0	0.22942	0	0	0	0	0	0.374527	0	0.873753	0.35381	0	0.22612	0	0	0.187335	0	0	0	0	0	0	0	0.280616	0	0	0	0.528934	0	0	0	0	3.32101	0	0	0	0	0.513576	0.269605	0	0	0
ENSG00000162777.16	DENND2D	0	0	0	0	0.401187	0	0	0	0	0	0	0	0	0	0	0	0	0	0	0	0	0	0	0	0	0	0.496832	0	0	0	0	0	0	0.261939	0	0.355187	0	0	0	0	0	0	0	0	0	0	0.567539	0
ENSG00000198837.9	DENND4B	0	0	0	0.673104	0	0.217621	0	0.691278	0.594723	0	0	0.559888	0.345927	0.187263	0.316699	0.582502	0.527878	0	0.454952	0	0	0.621366	0.331496	0.716212	0	0.432484	0.298068	0.26688	0.352232	0.739639	0.279556	0.298654	0.269653	1.88534	0.54022	0	0	0	1.28665	0	1.45002	0	0	0.513576	0.535787	0.71469	0.276051	0.292993
ENSG00000024526.16	DEPDC1	0.241694	0.306634	0	1.27775	0	0	0	0	0	0.629299	0	0.24094	0	0.187263	0	0.332188	0	0	0.517381	0.252769	0	0	0	0	0	0	0	0	0.595312	0	0	0.252936	0	0	0.239396	0.227166	0	0	0	0	0	0.278177	0	0	0	0	0.276051	0
ENSG00000121644.18	DESI2	0.483388	0	0	0	0	0	0	0	0	0	0.251606	0	0	0	0	0	0	0	0	0	0	0	0	0	0	0	0	0	0	0	0	0	0	0	0	0	0.827579	0	1.76711	0	0	0	0	0.734799	0	0	0	0
ENSG00000160049.11	DFFA	0	0.306634	0	0	0	0.217621	0.216125	0	1.39589	0.629299	1.22596	0.24094	0	0.373418	0.559125	0.302829	1.24531	0.714196	0.291262	0	0	0	0.310838	0.798098	0	0.432484	0	0	0.704464	0	0.559112	0	0.451851	0.638958	0.54022	0.227166	0.447303	0	0.688377	0	0.56328	0.192316	0	3.33666	0	1.4791	0	0
ENSG00000169598.15	DFFB	0	0	0	0	0	0	0	0	0	0	0	0	0	0.355576	0	0	0.70762	0	0	0	0	0	0	0.424084	0	0	0.594077	0	0.297656	0	0	0	0	0	0	0	0	0	0	0	0	0	0	0	0.267894	0	0.276051	0
ENSG00000116133.11	DHCR24	0.725083	0	0	0	0.401187	1.59438	0	0.276959	0	0	0.538562	0	0	0	0.558285	0	0.70762	0	0	0	0.469438	0.170444	1.25022	0	0	0	0	0.26688	0	0.229511	0.559112	0	0	1.95371	0	0	0	0.16834	0	0	0	0.384632	0	0.513576	0.267894	1.2903	0	0
ENSG00000117682.16	DHDDS	1.45017	2.27817	1.95993	6.85646	2.0488	4.15278	3.4054	0.643738	2.53954	3.99977	3.95412	2.07662	10.4861	4.5077	0.724757	1.74751	2.40074	2.70268	4.77668	0	5.93825	5.0994	2.07941	1.64626	1.85972	2.91238	5.65537	1.77943	6.2384	6.24594	0.279556	1.95342	2.62115	6.80392	4.66076	1.16471	6.88131	3.80209	10.2378	1.09342	1.89339	9.21833	1.94106	7.36422	1.61592	7.11488	1.70262	0.310998
ENSG00000162496.8	DHRS3	0	1.74509	0.988682	0	0.311608	0	0.320729	0.45884	3.32455	1.162	1.39943	1.11978	1.2402	0.373418	3.92592	14.1203	0	3.40863	1.39388	1.69639	5.68384	4.89622	1.52662	0	0	1.72443	1.29173	1.27525	6.28057	1.8221	2.20216	0	0.991156	4.80326	2.04332	2.74374	0	0.674694	0	0.364473	3.175	13.6695	0.4682	1.05122	0	0.550752	1.53419	0
ENSG00000135829.16	DHX9	1.06212	2.38423	0	1.34621	1.69908	1.42231	0	0.691278	0.815984	0	1.00643	0	0.691854	0.710044	0.79987	0.302829	0	1.33508	0.975045	0.276051	0	1.27756	0.97383	1.00834	0.583509	0.432484	2.38367	0.443465	2.3354	1.18903	0.279556	0.505871	1.17815	0.905953	2.14817	1.0913	0.267418	0.16834	1.75172	2.18684	1.13534	0.268967	0.570742	0.513576	2.15342	1.6703	1.26564	0.34481
ENSG00000117597.17	DIEXF	0	0	0	0	1.07372	0	0.216125	0	0	1.162	0	0	0.345927	0	0	0	0.263939	0	0.228832	0	0	0.187335	0	0.399049	0	0	0	0	0	0	0.547682	0.429836	0	0.261939	0	0.227166	0	0	0	0	0	0	0	0.384392	0	0	0	0
ENSG00000162946.22	DISC1	0	0	5.86141	1.88239	8.7534	0.770659	2.5935	1.65727	1.06822	2.73692	0	3.54871	1.19126	0.186709	2.15803	13.8709	0.263939	4.83703	0	0	0	2.3427	3.50961	0.424084	0	1.33381	1.78326	8.76614	1.59743	0	0.279556	0.981426	0.225925	0.261939	1.83994	0	0	0	10.7899	1.82236	1.33011	0	1.42685	0.384392	0	5.33197	0.659727	0.87898
ENSG00000154309.8	DISP1	0	0.613268	0	0	0	0	0	0	0	0	0	0.438693	0	0.186709	0	0	0	0.422015	0.517381	0	0	0	0	0	0	0	0	0.176584	0	0	0	0	0	0.188509	0	0	0	0	0	0	0	0	0	0	0	0	0	0
ENSG00000116544.11	DLGAP3	0	0	0	0	0	0	0	0	0	0	0	0	0	0	0	0	0.263939	0	0	0	0	0	0	0	0	0	0	0	0	0	0	0	0	0	0	0	0	0	0	0	0	0	0	0	0.412543	0	0	0
ENSG00000178028.13	DMAP1	0	0	0	0	0	0	0	0	0	0.547384	0	0	0	0	0	0	0	0	0	0	0	0	0	0	0	0	0	0.26688	0	0	0	0	0	0	0	0	0	0	0	0	0	0	0	0	0.267894	0	0	0
ENSG00000185842.15	DNAH14	32.625	30.1632	0	36.3131	86.1386	0.388474	17.2933	12.2415	60.5645	4.52822	12.887	52.6133	29.7154	37.975	55.7606	38.2736	62.0318	168.645	89.1261	47.3664	25.285	21.5078	50.8574	101.905	32.7448	14.0609	38.1001	45.2083	83.9659	20.7972	54.9572	141.355	28.9614	92.0748	41.7807	56.6423	23.2976	37.2463	97.9464	25.621	47.4541	32.7286	35.2908	33.5053	51.867	39.0384	12.9547	41.8237
ENSG00000162616.8	DNAJB4	0	0	0	0	0.623215	0	0	0	0	0	0	0	0	0	0	0	0	1.26605	0.22612	0	0	0	0	0.424084	0	0	0.298068	0	0	0.229511	0	0	0	0	0.239396	0	0	0	0	0	0	0.278177	0	0	0	0.341506	0	0
ENSG00000007923.15	DNAJC11	0.541577	0	0.494341	0.673104	4.78134	1.46908	0.432249	0	0.281873	0	0.503213	0.24094	0	1.60846	0.633398	0.302829	0	0.714196	1.59097	0.252769	2.00674	0.77492	1.50596	0.798098	0.583509	0	0	0.443465	1.40893	0.561233	1.67734	0.252936	0.451851	0.523879	0	1.5345	1.03279	0.689796	1.06334	0.364473	0.84492	0	0	1.40163	2.41789	0.758398	0	1.51678
ENSG00000116138.12	DNAJC16	1.83032	2.05173	0.326655	2.48704	1.64977	3.70253	0.57669	1.10258	1.35009	2.38698	1.54499	1.60021	3.99145	2.99122	2.47641	2.79038	2.68429	4.22839	3.4705	2.32086	1.02085	1.49048	0.642334	3.28893	0.692705	0.791825	2.97775	0.982799	0.649888	0.561233	1.11822	2.03889	1.82802	3.3939	0.496798	4.10221	1.88569	1.97389	4.57382	1.82236	2.32129	3.86336	0	1.5648	2.04302	4.83207	1.39569	3.10558
ENSG00000116675.15	DNAJC6	1.54551	2.63913	2.86006	1.27775	3.65831	15.0235	2.81069	2.21343	0.548928	0	1.19061	1.2047	2.11974	0.355022	3.27544	4.80129	12.2733	3.05566	23.9837	0	6.74949	2.74085	3.52938	5.97217	2.33404	3.41758	4.26521	0.533761	3.79018	6.23102	12.711	3.14206	0	2.36757	3.11105	3.32956	13.1797	2.64725	5.30132	3.98848	0.580849	3.68809	1.2559	8.52055	2.56425	7.74817	5.6759	0
ENSG00000126698.10	DNAJC8	0	0	0	0	0.224177	0	0	0.68826	0.267055	0	0	0	0	0.355022	0	0	0	0.620888	0	0	0	0.170444	0.276394	0	0.692705	0	0	0	0	0	0	0	0	0	0	0	0	0	0.344189	0	0	0.384632	0	0	0	0.354337	0	0
ENSG00000197959.13	DNM3	0	0.750769	0	0.673104	0	0	0.432249	1.28748	0	0	0	0	0.285577	1.12192	0	0	0	0	0.452239	0	3.66946	0.75803	0.276394	6.95866	0	0	0.7949	2.39948	0	1.25123	0	0.252936	0.539305	0	0.478793	0	0.560161	0.338014	0	0.506118	0	0.192316	0.753571	0.897968	0	0.740351	0	0.34481
ENSG00000067334.13	DNTTIP2	0.966777	3.92874	2.69237	1.88239	0.672531	3.1645	0.472086	1.10784	1.33528	1.64215	0.860867	0	2.00381	1.43959	6.32553	1.45626	2.12286	4.15534	53.1876	2.24912	3.35497	4.15508	0.331496	2.23052	1.75053	1.51094	1.48725	0	2.38125	9.34436	3.90235	0.505871	0.88059	0.377018	2.97121	4.86059	3.11474	3.40234	0.567498	0	5.94844	1.88277	0.570742	2.07837	4.34109	0.51226	0.329864	0.914989
ENSG00000116641.17	DOCK7	2.00681	0.713557	1.05933	0.604644	10.6612	3.61649	1.84851	1.61422	1.8842	4.12998	1.83522	1.99861	0.285577	2.95332	1.74997	2.16694	4.81542	0.422015	6.51069	1.51599	5.13243	1.5319	4.67628	3.24246	2.91755	1.40144	5.45542	1.24968	3.21597	4.03138	0.838668	0.859673	0.952222	5.08591	1.25841	1.61904	3.93751	1.89704	11.1187	0.87059	1.29707	3.32188	0.753571	2.97318	1.61592	2.36013	3.81185	4.78001
ENSG00000117543.20	DPH5	0	0	0.406021	0	0.401187	0	0	0	0.281873	0	0	0	0.285577	0.542285	0	0	0	0	0.457664	0	0	0.170444	0	0	0	0	0	0	0.649888	0	0.331066	0.682772	0	0	0	0	0.585486	0	0	0	0	0	0	0	0	0	0	0
ENSG00000188641.13	DPYD	8.34133	1.70788	1.72136	3.76478	0.535785	8.01865	0	0.735799	1.64679	1.09477	0.538562	1.04177	0.285577	0	0.558285	13.6838	8.52191	0	6.1027	0.505539	5.10289	0	0.331496	1.1403	0.692705	2.19327	6.3558	1.36154	8.15092	6.72859	0	0	7.18903	2.37262	2.92038	12.0638	0	0.85947	7.56603	2.32848	0	0.537934	3.65329	1.43561	0.682148	0.183584	0.621351	33.625
ENSG00000117505.12	DR1	0	0	0	0	0	0	0	0	0	0	0	0	0	0	0	0	0	0	0	0	0	0	0	0	0	0	0	0	0	0	0	0	0	0	0	0	0	0	0	0	0	0	0	0	0	0	0	0
ENSG00000156171.14	DRAM2	0	0	0	0	0	0	0.216125	0	0	0	0	0	0	0	0	0	0	0	0	0	0	0	0	0	0	0	0	0	0.297656	0	0	0	0	0	0	0.227166	0	0.366884	0	0	0	0	0	0	0.269605	0	0	0
ENSG00000162490.6	DRAXIN	0	0	0	0	0	0	0	0	0	0	0	0	0	0	0	0	0	0	0	0	0	0	0	0	0	0	0	0	0	0	0	0	0	0	0	0	0	0	0	0	0	0	0	0	0	0	0	0
ENSG00000133059.16	DSTYK	0.263777	0	0.406021	0.604644	0.311608	0.435243	0	0	0	0.581	0.251606	0	1.03778	0.336626	0	0.291251	0.273746	1.33508	0.454952	0.457715	0.786132	0.511333	0	0	0	0	0.297039	0	0.297656	0.459022	0.547682	0	0.808958	0	0.239396	0.216034	0.292743	0.676028	1.47919	0	0.290425	0	0	0	0.269605	0.568798	0	0.585987
ENSG00000143476.17	DTL	2.13826	3.52182	3.99899	0.673104	4.19839	1.9373	2.1443	1.0603	1.4565	0.629299	1.04177	2.04035	1.03778	0.897307	0.559125	0	0.273746	0.714196	3.08069	0.504909	2.47618	1.73718	0.662992	2.68642	0	0.937678	3.57373	2.56008	4.08783	1.75026	0.279556	0.505871	0.495578	4.17466	0.54022	1.66252	2.79186	1.22368	11.9249	2.87237	2.83397	1.9608	1.03894	5.9835	3.92512	2.11239	2.41616	3.39638
ENSG00000143507.17	DUSP10	0	0	0.406021	0	0.401187	0	0	0	0	0	0	0	0	0	0	0.291251	0	0	0	0	0	0	0	0	0	0	0	0.3276	0	0	0	0	0	0.261939	0	0	0	0	0	0	0	0	0	0.513576	0	0	0	0
ENSG00000081721.11	DUSP12	0	0.306634	0	0	0.311608	0.435243	0	0	0	0	0.400444	0.481881	0	0	0	0	0.273746	0.292181	0.291262	0	0	0.187335	0	0.399049	0	0	0	0.3276	0	0	0	0.252936	0.495578	0.188509	0	0.216034	0	0	0.359576	0	0.580849	0	0	0	0	0.189599	0.329864	0
ENSG00000107404.19	DVL1	0	0	0	0	0	0.217621	0	0	0.548928	0	0	0	0	0	0	0	0	0.584363	0.452239	0.228857	0	0.187335	0.552789	0.292128	0	0	0	0	0	0	0	0	0.225925	0	0	0	0.292743	0	0.359576	0.364473	0	0	0	0	0	0	0.329864	0.292993
ENSG00000007968.6	E2F2	0	0	0	0	0	0	0	0	0	0	0	0	0	0	0	0	0	0	0	0	0.479282	0	0	0	0	0	0	0	0	0	0	0	0	0	0	0	0	0	0	0	0	0	0	0	0	0	0	0
ENSG00000117298.14	ECE1	3.80804	2.39557	1.64199	3.83324	4.32608	2.50413	2.56165	0	1.61715	1.12838	4.71638	1.79941	1.53718	3.27377	1.52463	0.91469	3.70649	4.09054	2.16807	0	7.69822	3.21945	1.45086	1.85651	1.16702	1.5473	1.78635	0.86136	5.47569	1.72952	2.516	0	1.17335	2.22071	3.4553	1.68479	1.14565	5.71691	5.71716	2.32848	1.12656	1.11488	1.00466	10.909	4.05179	9.81732	0.828154	4.69219
ENSG00000121310.16	ECHDC2	0	0	0	0	0	0.217621	0	0	0	0	0	0	0	0	0	0	0	0	0	0	0	0	0	0	0	0	0	0	0	0	0	0	0.269653	0	0	0	0.585486	0	0	0	0	0	0	0	0	0	0	0
ENSG00000143369.14	ECM1	0	0	0	0	0	0	0	0	0	0	0	0	0	0	0	0	0	0	0	0	0	0	0	0	0	0	0	0	0	0	0	0	0	0	0	0.227166	0	0	0	0	0	0	0	0	0	0	0	0
ENSG00000186197.14	EDARADD	2.05799	0	0	0	0	0	0	0	0	0	0	0	0	0	0.316699	0	0	0	0	0	0	0	0	0	0	0.322986	0	0	0	0	0	0	0	0	0	0	0	0	0.359576	0	0	0	0	0	0	1.41053	0	0
ENSG00000116406.18	EDEM3	0.263777	0.343846	0	0.604644	1.33816	0	0	0	0.267055	1.75768	0	1.67966	1.53718	0.336626	0	0.302829	0	0	1.62271	0	0.524088	0.187335	0.60789	0	1.16702	0	1.2907	0.26688	0.595312	0.280616	0.279556	1.97228	0.495578	1.5868	0.239396	0.571221	0.982139	0	0.344189	4.28686	3.31248	1.21916	0.9364	0.513576	0.805392	0	0.659727	0.87898
ENSG00000159658.10	EFCAB14	1.28874	0.343846	0	0	1.33601	0.217621	0	0.22942	0.563747	0	0	0.24094	0.285577	0	0.241586	0	1.25511	0.714196	0.681071	0.228857	0.704157	0.493394	0.994488	0.292128	0	0	0.993664	0.176584	0.649888	0.561233	0	0	0	0.523879	0.509506	0.659234	0.878229	0.844368	0	0	0.28164	2.06508	0.4682	0.863982	0.950041	1.42336	0	0.310998
ENSG00000203666.12	EFCAB2	0.798342	0	0.494341	0.673104	1.43249	0.823717	2.56165	0	1.61715	0.629299	2.33844	2.68516	0.571154	1.08402	2.5532	1.46783	0.263939	0.584363	0.452239	4.31721	1.66272	1.75511	0.276394	0.848167	0.583509	3.34994	0.297039	2.17176	0.352232	2.25075	0	3.19721	2.96723	1.20473	1.08044	3.33618	3.23434	1.71494	5.40375	0	1.00665	0.653599	6.4043	4.44594	3.23784	1.2081	3.10581	0.655807
ENSG00000203965.12	EFCAB7	0.241694	0.687692	0.326655	0	1.69693	0	0	0	0	0	0.652051	0	0.620102	0.186709	0	0	0.263939	0.422015	0.457664	0	0.524088	0.187335	0	0.399049	0	0	1.09194	0	0	1.41854	1.37492	0	0	0.785818	0	1.02555	0	0	0	0	0.443369	0.653599	0	0	0	0.360353	0	0
ENSG00000169242.11	EFNA1	0	0	0	0	0	0	0	0	0	0	0	0	0	0	0	0	0.35381	0	0	0	0	0	0	0	0	0	0	0	0	0	0	0	0	0	0	0	0	0	0	0	0	0	0	0	0.412543	0	0	0
ENSG00000135766.8	EGLN1	4.833	2.04038	2.613	2.62396	1.82678	3.23552	0.255961	0.783339	1.97445	3.48175	0.251606	3.16013	2.09693	1.12081	1.50922	6.51323	3.26849	3.73734	0	1.23993	2.65625	2.31607	2.99126	0.399049	1.38541	1.40144	1.98511	0.3276	1.4548	1.46001	0	1.45698	2.76816	4.40987	0.54022	1.94083	4.11739	0.183442	12.9012	0.728946	0.862489	0.461283	1.00466	1.24837	4.32653	1.61216	0.897402	1.94942
ENSG00000070785.16	EIF2B3	1.01094	0	0	0	0.535785	0.645361	0	0	0.815984	0	0.286956	1.11978	0.631504	0.74739	0	0.926268	0.801624	0.422015	0.454952	0	0.479282	0.77492	0.276394	0	0	0	0	0	0.892968	0.459022	0	0.298654	0.451851	0.340425	0.257402	0.897532	0.585486	0.844368	1.61545	0	0	0.384632	0.4682	0	0.53921	1.22695	0.276051	0.292993
ENSG00000143486.15	EIF2D	0	0.687692	0	0	0	0	0	0	0.281873	0	0	0	0	0.710044	0.633398	0	0.971559	0	0	0	0.234719	0.170444	0.276394	0.424084	0	0	0	0	0	0	0	0.298654	0.341285	0.94279	0	0	0	0	0	0	0.290425	0	0	0	0	0.531106	0	0
ENSG00000084623.11	EIF3I	1.58266	0.613268	0	0.673104	0.448354	0.652864	0.216125	0	0	0.629299	1.00643	0.318948	0.285577	1.12136	0.316699	0	0.617749	1.26605	3.33312	0.91543	0	0.681777	0	3.39585	0.583509	0.432484	0.993664	0.86136	0.947544	0	0	0.298654	0.793135	0.188509	0.27011	1.1247	0.447303	0.858136	1.42292	0.364473	1.5875	0.845915	0.753571	0.897968	0.808815	0.929951	0.329864	0.292993
ENSG00000075151.20	EIF4G3	14.4422	20.3945	12.5884	15.2645	14.8574	22.6867	3.96408	4.60271	17.2548	5.88766	23.6229	11.5124	11.1599	20.0952	16.3685	25.3183	27.4721	29.3513	34.0183	4.40449	14.1485	9.38405	10.9137	37.6942	13.6732	13.6441	19.8576	8.5017	29.4372	23.4554	11.3132	5.77826	8.77196	25.4018	12.6445	14.9345	20.8059	20.2985	50.1832	11.5178	15.4591	28.4961	10.1618	34.3761	30.9071	23.9384	5.71428	7.52718
ENSG00000162374.16	ELAVL4	0	0	0	0	0	0	0	0	0	0	0	0	0	0	0	0	0	0	0	0	0	0	0	0	0	0	0	0	0.595312	0	0	0	0	0	0	0	0	0	0	0	0	0	0	0	0	0	0	0
ENSG00000163435.15	ELF3	0	0	0	0	0	0	0	0	0	0	0	0	0	0	0	0	0.273746	0.620888	0	0	0	0	0	0	0	0	0	0	0	0	0	0	0	0	0	0	0	0	0	0.728946	0	0	0	0	0	0	0.291488	0
ENSG00000158711.13	ELK4	0.966777	0	0.812043	0.604644	5.45172	0.217621	3.01299	0.553919	1.4565	0.629299	0.974356	0	0.345927	0.542285	0.558285	0.291251	0.527878	0.422015	0.904479	0	0.234719	0.852221	0.642334	0.292128	1.96892	0	1.39104	1.18495	0.352232	0	0	0	1.93858	0.261939	0.239396	0.432068	0.827579	0	0.359576	0	0	0	0.4682	0	0	0	0.881966	0
ENSG00000011007.12	ELOA	0.541577	0	0.326655	0	0.623215	0.513773	0	0.920698	0.281873	0	0.251606	0	0.345927	0.374527	0.633398	0.623439	0	0.292181	0.683784	0	0	0	0	0.584256	0	1.40652	0	0	0.352232	0.280616	0	0	0.225925	0.188509	0.514804	0	0.292743	0.521456	0	0	0	0.192316	0	0	0.680436	0.740351	0	0
ENSG00000066322.14	ELOVL1	0	0	0	0	0	0	0	0	0	0	0	0.24094	0	0	0	0	0	0	0	0	0	0	0	0	0	0	0	0	0	0.500492	0	0	0	0	0	0	0	0.366884	0	0	0	0	0	0	0	0	0	0
ENSG00000231752.5	EMBP1	0	0	0.494341	0	0	0	0	0	0	0	0	1.31608	0	0	0	0	0	0	0	0	0	0	1.32598	0	0	0	0	0	1.48828	0	0	0	0	0	0	0	0	0	0	0	0	0	0	0	0	0	0	0
ENSG00000127463.14	EMC1	0.263777	0.406923	0	0	0	1.50205	0	0	0	0	0	0	0	0.373418	0	0	0.35381	0.292181	1.59369	0.505539	0.958564	0.246697	0	0.798098	0	0	1.2907	0.176584	0	0.229511	0	0	0	0.94279	0	0.710375	0	1.07178	0	0.87059	0	0.278177	0	0	2.02333	0.91792	0.567539	0
ENSG00000154380.17	ENAH	0.270788	1.5274	0.820996	0.604644	5.00122	1.42352	0	1.01276	1.12883	0	1.29338	1.67821	0	1.53321	0.316699	2.14379	1.14563	0	3.04728	0.552102	3.6771	1.83137	1.16068	12.7384	0	0	5.26196	4.09262	4.77992	7.6563	0.559112	1.92311	3.61231	2.90156	0.257402	6.24029	4.36843	1.37692	15.2973	0.87059	1.17716	0.268967	3.23124	0.513576	3.78047	1.2081	0.605915	3.05157
ENSG00000074800.14	ENO1	0.263777	0.750769	0	0	0	0	0	0	0.267055	0	1.08784	0.481881	0	0.896753	0	0.302829	1.4488	0	0	0	0.479282	0	0	0	0	0	0	0	0	0.459022	0	0.252936	0	1.04776	0.527512	0.454332	0	0.351782	0.359576	0.364473	0.28164	0.537934	0	0	1.33947	0.549952	0.276051	0
ENSG00000143420.18	ENSA	0	0	0	0	0	0	0.216125	0	0	0	0	0	0	0	0	0	0	0	0	0	0	0	0	0	0	0	0	0	0	0	0.279556	0	0	0	0	0	0	0	0	0	0	0	0	0	0	0	0	0
ENSG00000159023.20	EPB41	2.84231	1.0574	1.48302	1.34621	2.80877	0.862982	0.536854	1.1056	2.27248	0.581	0.251606	0.559888	5.1713	4.1867	2.64372	0.332188	1.98648	3.64002	1.71312	0.552102	2.19445	0.698667	1.50596	1.67448	0	0.322986	1.78635	3.05869	3.19486	4.59407	0.838668	2.59048	0.677776	2.6295	0.239396	1.45762	1.83504	1.94368	5.14966	1.01224	2.33008	1.04744	1.90693	5.56828	0.803681	4.66212	2.08629	0
ENSG00000183317.16	EPHA10	0	0	0	0	0	0	0	0	0	0	0	0	0	0	0	0	0	0	0	0	0	0	0	0	0	0	0	0	0	0	0	0	0	0	0	0	0	0	0	0	0.56328	0	0	0	0	0	0	0
ENSG00000142627.12	EPHA2	1.33992	1.5274	0	0	1.43249	2.06138	1.72208	0	1.36491	1.2586	3.17467	2.32303	0.620102	2.18865	0.316699	0.582502	0	0.422015	2.63116	1.01045	1.18344	0.962255	0.276394	0.823132	0	0.791825	1.19124	1.00837	2.4904	0.561233	0.827238	0	1.53046	2.14752	1.06773	1.64792	0	0.520122	4.14565	0	1.00665	1.12409	0	3.07829	1.88039	1.23376	3.95785	0.87898
ENSG00000133216.16	EPHB2	0	2.29529	0.732677	0.604644	0	0	0.511922	0.22942	2.13644	1.72407	0.251606	0	0	0	0	1.18816	0	1.53396	0	0	1.26541	1.80579	1.45086	0	0	0	0.7949	0.504184	4.90145	0	1.39778	0	0.808958	0.565528	4.57815	0.681498	0.447303	0.703563	1.25588	0	1.74044	1.07587	0.753571	1.08521	0.412543	0.721505	1.39569	0.34481
ENSG00000143819.12	EPHX1	0	0.343846	0	0	0	0	0	0	0	0.629299	0.251606	0	0	0	0	2.44041	0	0.292181	1.9764	0.228857	0	0	0	0	0	0.432484	0	0	0	0.229511	0	0.298654	0	0.340425	0	0.571221	0	0	0	0	0.443369	0	0.570742	0	0	0.189599	0	0
ENSG00000172031.6	EPHX4	0	0	0	0	0	0.256886	0	0	0.563747	0	0.251606	0	0	0.374527	0	0.302829	0	0	0	0	0	0	0	0	0	0	0	0	0	0	0.547682	0	0	0.261939	0.239396	0	0	0	0	0	0	0	0.4682	0.513576	0	0	0	0
ENSG00000136628.17	EPRS	4.49718	0.406923	1.22702	0	2.67202	1.29822	1.77682	0.873158	1.11268	1.67577	0.800889	2.43586	3.55239	2.2806	4.00019	4.95815	2.22667	4.77623	6.62175	0.804872	1.43785	2.77673	2.07941	2.28059	1.16702	1.26066	2.67968	3.48856	3.51362	0.811479	1.37492	1.23436	2.43896	2.6714	0	3.43185	0.852904	2.28036	6.55719	0.364473	5.60742	3.13174	3.88227	1.94919	1.61421	3.75022	0.291488	1.8796
ENSG00000085832.16	EPS15	4.43094	3.63346	5.22577	4.30097	19.9482	6.79478	4.88224	3.77485	9.42337	4.47992	3.20674	6.15732	5.68687	8.22737	4.55848	6.35637	11.171	8.95207	11.4001	6.84238	12.8306	3.80655	8.42788	13.4614	0	2.69846	12.6033	3.72186	10.6624	9.49093	1.67734	3.66334	3.3743	5.98608	6.38526	2.58232	6.5543	12.244	21.5512	2.97624	2.84275	12.6808	1.43873	5.6331	4.46433	11.0547	0.912839	5.10682
ENSG00000117419.14	ERI3	12.4072	3.95461	5.94054	11.4997	10.3517	5.30441	2.57655	2.02629	20.1022	7.94698	10.5452	12.5875	0.285577	15.8562	5.67841	20.2504	12.7325	10.3154	18.6209	5.2171	19.9515	2.83609	7.2672	19.1415	1.75053	4.78774	16.3747	8.17009	21.0767	6.23249	2.22502	4.33668	6.6016	14.3876	6.7359	6.98406	8.97635	7.05741	14.8916	8.857	9.02223	12.5275	6.89626	7.30301	14.0246	13.2785	2.82226	12.952
ENSG00000164010.14	ERMAP	0	0	0	0	0	0	0	0	0	0	0	0	0	0	0.241586	0	0	0	0.228832	0	0.234719	0	0	0	0	0	0	0	0	0	0	0	0	0	0	0	0	0	0	0	0	0	0	0	0	0	0	0
ENSG00000086619.13	ERO1B	0	0	0	0	0	0	0	0	0	0	0	0	0	0	0	0	0	0	0	0	0	0	0	0	0	0	0	0	0	0	0	0	0	0	0	0	0	0	0	0	0	0	0	0	0	0.556767	0	0
ENSG00000116285.12	ERRFI1	0	0	0	0	0	0	0	0	0	0	0.286956	0	0	0	0	0	0	0.292181	0	0	0	0	0	0	0	0	0	0	0	0	0	0	0	0	0	0	0.447303	0	0.344189	0.364473	0	0.384632	0	0	0	0	0	0
ENSG00000196482.16	ESRRG	0	0	0	0	0	0	0	0	0	0	0	0	0	0.187263	0	0	0	0	0	0	0	0	0	0	0	0	0	0	0	0	0	0.252936	0	0	0	0	0	0	0	0	0	0	0	0	0	0	0	0
ENSG00000143845.14	ETNK2	0	0	0	0	0	0	0	0	0	0	0	0	0	0	0	0	0	0	0	0	0	0	0	0	0	0	0	0	0	0	0	0	0	0	0	0	0	0	0	0	0	0	0	0	0	0	0	0
ENSG00000067208.14	EVI5	0.783271	3.27826	4.33436	9.0127	11.1943	10.0708	4.80364	1.51914	5.3273	9.22451	3.20346	2.43586	5.25923	4.9948	6.38608	9.27426	7.97596	9.34982	6.6986	2.98289	5.99153	2.47622	5.49171	8.17087	2.55243	2.30784	8.43626	0.504184	10.268	3.66929	6.34977	3.83427	5.53881	12.7325	5.4552	5.46069	5.6802	1.78911	10.3894	1.23506	3.06177	5.58848	2.72891	7.44318	11.7908	2.63033	5.60717	3.86502
ENSG00000174371.16	EXO1	0.263777	1.8398	0	0	0.712794	1.03383	0	0	1.72356	0.547384	0.400444	0.800829	0.620102	0	1.91896	0	0.537685	1.16873	3.30952	0.252769	0.469438	0.791811	0.276394	0	0	0	1.09297	1.45183	1.00212	1.02026	0.279556	1.05746	1.24978	0	0	3.74251	0.447303	0.520122	2.51703	0	1.14413	1.82454	0.502331	0.384392	1.61078	0.708674	0	0.310998
ENSG00000164002.11	EXO5	0	0	0	0	0	0	0	0	0	0	0	0	0	0	0	0	0	0	0	0	0	0	0	0	0	0	0	0.353169	0	0	0	0	0	0	0	0	0	0	0	0	0	0	0	0	0	0	0	0
ENSG00000171824.13	EXOSC10	2.10812	0.713557	2.47171	1.27775	0	0.645361	0.255961	0.735799	1.09786	1.7913	2.96586	1.11978	0.620102	2.48626	0.241586	1.24688	1.35892	1.33508	0.228832	0.504909	2.73822	0.75803	1.56106	1.51431	1.96892	0.755471	1.19124	1.45584	2.99766	1.12247	1.10679	0	1.15024	0.900897	1.45438	1.45762	0.827579	1.02514	2.06513	1.09342	1.88671	1.65282	0.502331	1.43561	3.51087	4.18675	0	1.2778
ENSG00000158161.15	EYA3	2.5554	1.64481	1.05933	0.604644	6.42681	3.90218	5.39728	1.28748	6.05437	1.12838	5.08476	3.35643	0.917081	2.48626	2.15803	2.51691	4.1796	3.51019	5.51204	0.252769	3.19782	2.57041	3.03258	7.64665	1.16702	0.968959	3.67319	4.03191	4.05436	3.12297	2.20216	4.71137	0.610937	3.27352	2.77741	2.55658	2.99707	3.57335	8.88652	0.87059	2.5699	2.78612	4.62367	6.46309	7.17494	3.9094	4.27228	0.621996
ENSG00000158769.17	F11R	0	0	0	0	0	0	0	0	0	0	0	0	0	0	0	0	0	0	0	0	0	0	0	0	0	0	0	0	0	0	0.279556	0	0	0	0	0	0	0	0	0	0	0	0	0	0	0	0	0
ENSG00000117525.13	F3	0	0	0	0	0	0	0	0	0.830802	0	0	0.559888	0	0	0	0	0	0	0	0	0	0	0	0	0	0	0	0	0	0	0	0	0	0	0	0.681498	0	0	0	0	0	0	0	0.350407	0	0	0	0
ENSG00000198734.10	F5	0	0	0	0	0	0	0	0	0	0	0	0	0	0	0	0	0	0	0	0	0	0	0	0	0	0	0	0	0	0	0	0.597308	0	0	0	0	0	0	0	0	0	0	0	0	0	0	0	0
ENSG00000117480.15	FAAH	0	0	0	0	0	0	0	0	0	0	0	0	0	0	0	0	0	0	0	0	0	0.170444	0	0	0	0	0	0	0	0	0	0.252936	0	0	0	0	0	0.16834	0	0	0	0.278177	0	0	0	0	0	0
ENSG00000162585.16	FAAP20	0	0	0	0	0	0	0	0	0	0	0	0	0	0	0	0	0	0	0	0	0	0	0	0	0	0	0	0	0	0	0	0	0	0	0	0	0	0	0	0	0	0	0	0	0.267894	0	0	0
ENSG00000185104.19	FAF1	6.53099	3.92874	6.47046	5.11099	27.3925	5.2969	3.06666	2.34476	24.0151	0.581	5.87821	9.44556	12.1426	6.63784	4.95197	2.87225	13.0569	14.7507	21.5794	7.54639	6.86507	5.73975	2.79063	9.79529	0	7.77284	10.0271	11.2655	10.8596	8.76239	2.74984	2.79769	4.48811	18.3678	16.0425	4.96635	6.73418	11.4396	28.3809	1.59954	4.77338	8.49947	5.52608	13.0079	7.01231	11.5305	6.91067	9.54212
ENSG00000162636.15	FAM102B	0	0	0	0.604644	0	0	0	0	0	0	0	0	0.620102	0	0	0.291251	0.273746	0	0.678359	0	0	0	0	0	0	0	0	0	0	0	0	0	0	0	0	0.227166	0.292743	1.04158	0	0	0	0	0	0	0	0	0	0.34481
ENSG00000135842.16	FAM129A	0.541577	0	0	0.673104	0.535785	0.217621	0.320729	0.276959	0	0	0	0	0	0	0	0	0	0	0.452239	0	0	0.170444	0	0.399049	0.583509	0	0	0.176584	0.297656	0	0	0	0	0	0	0	0	0	0.344189	0	0	0	0	0.513576	0.269605	0	0.329864	0.637803
ENSG00000160767.20	FAM189B	0	0	0	0	0	0	0	0	0	0	0	0	0	0	0	0	0	0	0	0	0	0	0	0	0	0	0	0	0	0	0	0	0	0.340425	0	0	0	0	0	0	0	0	0	0	0	0	0	0
ENSG00000116199.11	FAM20B	0.263777	1.67067	0.653311	3.09168	2.14529	7.27975	0.68821	0.735799	0.815984	0.581	2.15425	1.7214	0.571154	1.68149	0.316699	0.582502	2.65487	3.25453	5.39261	0.252769	2.72074	2.70812	0.552789	0.424084	0.583509	0.968959	0.596137	1.51255	3.3921	2.34622	1.38635	1.69451	0.793135	1.46642	4.83555	4.91834	0	3.46141	5.68639	0.364473	1.44334	2.83434	0	1.08521	1.21622	5.23773	1.26564	1.17197
ENSG00000143409.15	FAM63A	0	0	0	0	0	0	0	0	0	0	0	0	0.620102	0	0	0	0	0	0	0	0	0	0	0	0	0	0	0	0	0	0	0	0	0	0	0	0	0	0	0	0	0	0	0	0	0	0	0
ENSG00000154511.11	FAM69A	0	0	0	0	0	0	0	0	0	0	0	0	0	0	0	0	0	0	0	0	0	0	0	0	0	0	0	0	0.352232	0.530862	0	0	0	0	0	0	0	0	0	0	0	0	0	0	0	0	0	0
ENSG00000188610.12	FAM72B	0	0	0	0	0	0	0	0	0	0	0	0	0	0	0	0	0	0	0	0	0	0	0	0	0	0	0	0	0	0	0	0	0	0	0	0	0.292743	0	0.359576	0	0	0	0	0	0	0	0	0
ENSG00000263513.5	FAM72C	0	0	0	0	0	0	0	0	0	0	0	0	0	0	0	0	0	0	0	0	0	0	0	0	0	0	0	0	0	0	0	0	0	0	0	0	0	0	0.359576	0	0	0	0	0	0	0	0	0
ENSG00000215784.5	FAM72D	0	0	0	0	0	0	0	0	0	0	0	0	0	0	0	0	0	0	0	0	0	0	0	0	0	0	0	0	0	0	0	0	0	0	0	0	0	0	0	0	0	0	0	0	0	0	0.276051	0
ENSG00000009780.15	FAM76A	0	0	0	0	0	0	0	0	0	0	0	0	0	0.168313	0.483172	0.302829	0	0	0	0	0	0.170444	0	0	0.692705	0	1.4905	0.176584	0	0	0	0	0	0.340425	0	0	0	0	0.344189	0	0	0	0	1.28236	0.267894	0.170753	0	0
ENSG00000162458.12	FBLIM1	0	0.687692	0.406021	0	0	0	0.255961	0	0	0	0	0	0	0	0	1.91125	0.273746	0	0	0.481627	0	0.434032	0.60789	0	0	0	0.298068	0.3276	0	0	0	0	0	0	0	0	0	0.506354	0.344189	0	0	0	0	0.734799	0.412543	0.170753	0.291488	0
ENSG00000143756.11	FBXO28	0	0.306634	0	0	1.33816	0.513773	0.255961	0	0	0	0	0	0	0	0	0	0	0	0	0	0	0	0	0	0	0	0	0	0.561837	0.280616	0	0	0	0	0	0.681498	0	0	1.37675	0	0	0	0.4682	0	0.412543	0.189599	0	0
ENSG00000037637.10	FBXO42	0.754177	0	0	0	0.672531	1.79821	0.216125	0	0.594723	0.629299	1.04177	0.318948	0	0	0	0.332188	0.35381	1.00638	1.20117	0.78096	0	1.3021	0	0	1.27621	0.645973	0.298068	0	0.595312	0.479757	0.547682	0.252936	0	1.35135	0	0.582353	0	0.183442	0.359576	0.364473	1.41698	0	0.502331	1.02715	0.807103	1.23978	0	0
ENSG00000132879.13	FBXO44	0.263777	0	0	0	0	0	0	0	0	0	0	0	0	0	0	0	0	0	0	0	0	0	0	0	0	0	0.297039	0	0	0	0	0	0	0	0	0	0	0	0	0	0	0	0	0	0	0	0	0
ENSG00000172456.17	FGGY	2.35086	1.02019	7.43276	4.36943	16.0345	2.72053	1.08861	6.39959	15.7313	0	2.91979	3.87603	2.18009	14.265	3.18492	4.39881	7.76365	7.25978	15.1105	13.1249	12.4965	2.43584	2.84573	7.88871	1.38541	1.18796	19.8431	2.79181	0.352232	2.23965	0.547682	2.63619	1.02385	10.1244	7.90848	7.02407	4.85744	11.691	11.6862	2.64955	5.20586	7.63513	2.54593	3.06838	5.95187	3.67529	1.2427	12.4698
ENSG00000091483.6	FH	0	0	0	0.673104	0	0	0.320729	0.276959	0.281873	0	0	0	0.345927	0.373418	0	0	0	0	0.228832	0	0.479282	0	0	0	0.692705	0.432484	0	0.26688	0	0	0	0.429836	0.269653	0.261939	0	0	0.292743	0.351782	0	0.728946	0	0	0	0	0	0.189599	0	0
ENSG00000142621.19	FHAD1	0	0	0	0	0	0	0	0	0	0	0	0.24094	0	0	0.316699	0.291251	0	0.620888	0	0	0	0	0	0	0	0	0	0	0	0	0.547682	0	0	0	0	0	0	0	0	0	0	0	0	0	0	0	0.659727	0
ENSG00000183386.9	FHL3	0	0	0	0	0	0.217621	0	0	0	0	0	0	0	0	0	0	0	0	0	0	0	0	0	0	0	0	0	0	0	0	0	0	0	0	0	0	0	0	0	0	0	0	0	0	0	0	0	0
ENSG00000160688.18	FLAD1	0	0	0	0.673104	0	0.217621	0	0	0	0	0	0	0	0	0.241586	0	0	0	0	0	0	0.187335	0	0	0	0	0	0	0	0	0	0	0	0	0	0	0	0	0	0	0.443369	0	0	0	0	0	0.291488	0.689619
ENSG00000162769.12	FLVCR1	3.1492	7.07509	3.34568	4.83715	5.30592	3.23431	0	0.783339	3.59294	1.09477	2.33844	4.79805	7.75767	1.10297	5.19272	5.14892	2.93842	14.0488	13.4669	2.3196	3.70663	6.29411	3.13591	2.86485	3.24513	4.03227	2.0856	1.95602	8.11744	4.43494	3.33181	11.0546	3.5844	5.22723	0.478793	8.93949	4.02243	2.60328	7.5436	4.4285	3.87576	4.64967	2.29484	5.06463	4.46091	4.48455	1.26564	3.36247
ENSG00000155816.19	FMN2	0	1.26375	0.732677	0	0	0	0	0	0	3.41877	0	0	0	0	0	0	4.88568	0	0	0	0	0.340888	0	0	0	0	0	0	0	0	0	0	0	0	0	0	0.585486	0	0	0	0	0	0	0	0	0	0	0
ENSG00000131781.12	FMO5	0	0	0	0	0	0	0	0	0	0	0	0	0.285577	0	0	0	0	0	0	0	0	0	0	0.292128	0	0	0	0	0	0.229511	0	0	0	0	0	0	0	0	0	0	0	0	0.570742	0	0	0	0	0
ENSG00000137942.16	FNBP1L	0.527554	0	0.326655	0	2.3223	0.217621	2.27384	0.414318	0.281873	0	0.286956	0	0.620102	0.336626	0	0	0.627556	1.98024	1.89037	0.457715	0	0.170444	0.587232	1.11526	0	0.468839	0.594077	0.504184	0	0.229511	0	0	0.269653	0.528934	0.718189	0.216034	1.18735	0.550325	2.36538	0	0.290425	0	0	0.513576	0	0.562783	0	0.966805
ENSG00000143107.8	FNDC7	0	0	0	0	0	0	0	0	0	0	0	0	0	0	0	0.291251	0	0	0.454952	0	0	0	0	0	0	0	0	0	0	0	0	0	0	0	0	0	0	0	0	0	0.290425	0	0	0	0.269605	0	0	0
ENSG00000198815.8	FOXJ3	3.16323	1.97731	0	2.5555	9.77566	5.59009	1.6504	1.47237	5.40038	2.73692	0.538562	3.35498	1.93206	0.691648	2.15887	0.291251	3.42547	5.62427	8.80443	1.28587	6.18824	2.49416	3.12213	3.76987	0	1.72994	5.36111	0.710345	3.49252	2.64757	1.37492	2.423	3.5844	6.78731	0.718189	0.937541	2.679	5.31315	8.02627	1.01224	2.76677	3.7477	2.6605	2.14634	9.28384	2.69482	4.86318	6.92099
ENSG00000259030.6	FPGT-TNNI3K	0	0	0	0	0	0	0	0	0	0	0	0	0	0	0	0	0	2.30895	0	0	0	0	0.331496	0.691177	0	0	0.496832	0.176584	0	0	0	0.935708	0	0	0	0	0.292743	0	0	0	0	0	0	0	0	0	0	0
ENSG00000156869.13	FRRS1	0.791331	0	0	0	0	0	0	0	0	0	0	0	0	0.187263	0	0	0	0.422015	0.808643	0	0.479282	0.170444	0	0	0	0	0	0	0	0	0	0	0	0	0	0	0	0.50502	0	0	0.290425	0	0	0	0.412543	0.183584	0	0
ENSG00000162613.16	FUBP1	0	0.343846	0.406021	0	0.535785	1.37675	0	0.276959	0.281873	0	0.573911	1.28271	0.691854	0.336626	0.241586	0	0.263939	2.08581	0.972333	1.74421	0.479282	0.545114	0.621676	1.1403	0	0	1.78223	0.59448	3.12791	0.739639	0.547682	0.682772	0.495578	1.08941	0.736195	1.14244	1.69686	0.674694	2.36538	1.59954	0.871274	1.11271	2.76289	2.49675	0.53921	0.935966	0.582975	0.292993
ENSG00000143458.11	GABPB2	0.512483	0.613268	0.820996	0.673104	1.159	0.909751	0	1.05806	0.281873	0.629299	1.70455	2.28129	2.21763	0.933544	1.75081	0.582502	0.821239	1.00638	3.41892	0	0.938876	0.545114	0.662992	0.399049	0.583509	0.864969	0	0.443465	0.892968	0	0.547682	0.981426	1.36035	1.39829	1.5084	0	0	1.22368	1.40753	0.728946	1.12656	0	1.03894	1.72796	2.15171	0.905089	0.291488	0
ENSG00000116717.11	GADD45A	0	0	0	0	0	0	0	0	0	0	0	0	0	0	0	0	0	0	0	0	0	0	0	0	0	0	0	0	0	0	0	0	0	0	0	0	0	0	0	0	0	0	0	0	0.412543	0	0	0
ENSG00000117308.14	GALE	0	0	0	0	0.311608	0.645361	0	0	0	0	0	0	0	0	0	0	0	0	0.457664	0	0	0.374669	0	0	0	0	0.297039	0	0	0.280616	0	0	0	0	0	0	0.292743	0	0	0	0.28164	0.268967	0	0	0	0	0	0
ENSG00000143641.9	GALNT2	0	0.750769	0.494341	0	1.4749	0.776948	1.00894	1.10258	1.41071	1.17668	0.903657	1.43872	0.345927	1.12247	0.241586	0.664375	0.971559	0.620888	0.452239	0	0.469438	1.67781	0.898071	0.848167	0	1.839	2.2854	0	1.2663	1.20976	1.11822	1.91713	1.60209	2.70775	0.718189	1.65139	2.24065	0.733767	3.76763	1.77895	0.290425	0.192316	0.570742	0.513576	1.07671	1.63862	1.21183	0.87898
ENSG00000234741.7	GAS5	0.995871	0.306634	0	0	1.38533	1.72596	0.216125	0	0	0	1.15526	0	0	0.186709	0.633398	0	0	0.620888	0.454952	0	0.234719	1.70235	5.87148	0	0.583509	0	0	0.3276	0	0.229511	0	1.49327	0.56721	0	0.239396	0.582353	0.292743	0	0.688377	0.364473	0	0.470492	0	0	0	0.183584	0.276051	0.310998
ENSG00000143614.9	GATAD2B	2.79113	0.613268	0	1.88239	1.69693	3.58473	0.89742	0.828636	1.39455	0.581	0	0.963762	9.40415	0.355022	4.71122	0.332188	1.68331	4.59363	8.3639	0	1.19328	0	2.07254	0	0	0.864969	0	0.680768	0.704464	0.730003	0.547682	0.298654	0.56721	1.42983	0.257402	0.937541	2.0492	1.08555	3.32101	0	0.56328	0.653599	0.570742	2.14634	5.93389	0.911104	0.897402	0.310998
ENSG00000177628.15	GBA	0.241694	0.343846	0.900362	0	0.401187	0.776948	0	0	0	0	0	0	0	0	0	0	0	0	0.582524	0	0	0.562004	0	0.399049	0	0.432484	0.496832	0	0.595312	1.02026	0	0	0	0	0	0	0.267418	0	0	0	0	0	0	0	1.33947	0	0.582975	0
ENSG00000117226.11	GBP3	0	0	0	0	0	0	0	0	0	0	0	0.24094	0	0	0	0	0	0	0	0	0	0	0	0	0	0	0	0	0	0.229511	0	0	0	0	0	0	0	0	0	0	0	0	0	0	0	0	0	0
ENSG00000162654.8	GBP4	0	0	0	0	0	0	0	0	0	0	0	0	0	0	0	0	0	0	0	0	0	0	0	0	0	0	0	0	0	0	0	0	0	0	0	0	0	0	0	0	0	0	0	0	0	0	0	0
ENSG00000154451.14	GBP5	0	0	0	0	0	0	0	0	0	0	0	0	0	0	0	0	0	0	0	0	0	0	0	0	0	0	0	0	0	0	0	0	0	0	0	0	0	0	0	0	0	0	0	0	0	0	0	0
ENSG00000023909.9	GCLM	0.512483	7.26432	0	0.604644	0.623215	0.217621	0.832651	0.643738	0.267055	0	1.91336	0.559888	0.345927	1.02883	3.20284	0.937846	0.617749	0.292181	32.8606	0.252769	0.262044	1.09787	0	1.62123	0.692705	1.26066	5.35612	0	6.08337	4.40457	0.559112	5.413	1.84384	3.1635	1.26371	2.25601	4.56469	0.521456	4.98262	0	2.62718	0.268967	1.00466	1.53757	0.537499	0.183584	0.828154	0
ENSG00000196505.10	GDAP2	0.270788	1.26375	0.812043	0.604644	1.78436	2.46486	1.61056	1.0603	0.548928	2.22315	1.72918	1.31608	2.55216	1.27183	0.558285	1.83476	3.00868	1.72057	5.48573	0.457715	1.50013	1.79759	0.552789	0	0	0.645973	4.86546	1.33597	3.16139	1.76136	1.65448	0.551589	1.34826	2.74458	0.797622	2.54892	2.26597	3.83939	2.75351	2.38894	1.72498	1.60379	0	1.21439	4.85889	2.16973	2.25523	2.89822
ENSG00000137960.5	GIPC2	0	0	0	0	0	0	0	0	0	0	0	0	0	0.168313	0	0	0	0	0	0	0	0.170444	0	0	0	0.468839	0.496832	0	0	0	0	0.298654	0	0	0	0	0	0	0	0	0	0	0	0	0	0	0	0
ENSG00000174332.5	GLIS1	0	0	0	0	0	0	0	0	0	0	0	0	0	0	0	0.302829	0	0	0	0	0	0	0	0	0	0	0	0	0.352232	0	0	0	0	0	0	0	0	0	0	0	0	0	0	0	0	0	0	0
ENSG00000174842.16	GLMN	0	0	0	0	0	0.823717	0	0	0.267055	0	0	0	0	0	0.558285	0.332188	0.617749	0	0.975045	0	0.993526	0	0	0	0	0.432484	0	0.26688	0.649888	0	0.279556	0	0	0.261939	0	1.01442	0.714721	0	0.567498	0	0	0.384632	0	0	2.16455	0.550752	0	0.655807
ENSG00000135821.18	GLUL	0	0	0	0	0	0	0	0	0	0	0	0	0	0	0	0	0	0	0	0	0	0.187335	0	0	0	0	0	0	0	0	0	0	0	0	0	0	0	0	0.359576	0	0	0	0	0	0	0.367168	0	0
ENSG00000162419.12	GMEB1	2.87946	0.687692	0.326655	0	0.623215	0.256886	0.472086	0.783339	1.18945	0.581	0.652051	1.43727	0.631504	0.934654	0.559125	0.582502	3.84953	0.84403	3.82961	0.528821	1.76218	1.00473	0.310838	0.424084	0.583509	1.65679	0.496832	0.59448	0.859493	0	1.39778	1.26468	3.36327	1.46667	0.27011	1.14244	0.878229	1.01137	3.06914	0	0.725009	0.192316	0.570742	3.10552	1.21965	2.70084	1.442	0.637803
ENSG00000065135.10	GNAI3	0	0	0.326655	0	0.401187	0	0	0.414318	0.815984	0.581	1.3041	0	0	0.560681	0.241586	0.59408	0.263939	0.620888	0	0.252769	0.234719	0	0	0	1.16702	0.432484	1.19021	0.26688	0.297656	0.250246	0	0	0.225925	1.12624	0	0	0	0.16834	0	0	0.443369	0	0	0	2.7089	1.08867	0	0.310998
ENSG00000134183.11	GNAT2	0	0	0	0	0	0	0	0	0	0	0	0	0	0	0	0	0	0	0	0	0	0	0	0	0	0	0	0	0	0	0	0	0	0	0	0	0	0	0	0	0	0	0	0	0.267894	0	0	0
ENSG00000078369.17	GNB1	11.4404	8.32749	3.434	4.83715	14.0636	18.4057	4.57261	4.92721	6.39686	8.7548	8.38683	6.10721	7.95489	16.7155	4.48252	11.1515	6.12117	7.30832	10.1169	6.06016	5.48408	8.24315	5.97477	19.6752	6.01595	8.86187	12.7956	9.76737	14.2888	3.92917	4.23342	7.05834	5.89697	27.7018	8.89255	11.0463	19.5955	25.1236	40.4214	3.4219	6.73398	9.08214	5.914	12.8713	20.9308	10.7777	14.2657	10.4865
ENSG00000168243.10	GNG4	0	0	0	0	0.311608	0.217621	0	0	0	0	0	0	0	0	0	0	0	0	0	0	0	0.357779	0	0	0	0	0	0	0	0	0	0	0	0	0	0.227166	0	0	0	0	0	0	0	0	0	0	0	0
ENSG00000134697.12	GNL2	0	1.37538	0.812043	1.27775	0	0.474508	0	1.24295	0	0.581	0.939007	1.67821	0	0.355576	1.43495	0.91469	3.08147	1.0429	0.915328	0	0	0	0.331496	1.30047	0	0.432484	0.298068	0	0.704464	0	0.559112	0.429836	0.225925	1.42983	0	0.454332	0.585486	0.873237	0.567498	0	1.1617	1.57399	0.502331	1.08521	1.8821	0.52509	0.276051	0.689619
ENSG00000116906.12	GNPAT	0	0	0.326655	0	0.311608	0	0	0	0	0	0	0	0	0	0.558285	0	0	0.84403	0	0	0.262044	0.187335	0	0	0	0	0	0.3276	0	0	0	0	0	0	0	0.216034	0	0	0.359576	0	0	0	1.00466	0	0.412543	0	0	0
ENSG00000143457.10	GOLPH3L	0	0	1.48302	0	0.802374	0.435243	0.536854	0	0.876596	0	0.652051	0	0.977431	0.916258	1.2668	0.291251	0.527878	0	4.77668	0.252769	0.234719	0.886002	0	0.399049	0	4.39669	0	0.529753	0	0.280616	0	0	0.56721	0.450448	0	0.681498	0.894606	0.351782	1.37675	0	0.28164	0.73946	0.570742	0	1.075	3.44039	0.329864	0
ENSG00000116580.18	GON4L	12.0912	10.1357	4.98791	12.1044	10.4503	15.9956	4.14036	8.15194	12.559	13.1528	9.93926	13.3633	9.71253	7.12218	6.3886	17.4129	11.028	12.3442	22.8829	1.44425	9.16966	11.4595	8.1506	6.76667	5.68836	20.6623	12.5029	10.544	17.8112	11.1004	11.0336	11.2101	17.4467	12.4443	13.476	13.5841	14.681	15.9879	13.5403	6.97981	10.0344	8.91608	6.26763	12.2317	37.1183	30.6653	9.05922	8.8524
ENSG00000120370.12	GORAB	0	0	0	0	0.224177	0.217621	0	0	0	0	0.860867	0	0	0	0.316699	0.332188	0.547492	1.26605	0.291262	0	0	0	0.276394	0	0.583509	0	0.594077	0.710345	0.352232	0	0	0	0	0.188509	0.27011	0	0	0	0.359576	0	0	0	0	0.350407	0	0	0	0.585987
ENSG00000092978.10	GPATCH2	0.527554	0.957114	0.494341	0	1.7372	0	0.536854	1.52216	1.14365	1.17668	0.251606	0.24094	0.285577	0.878357	0.241586	2.40568	0	0.292181	4.00958	0	0.731482	1.56673	0.310838	0.876384	0	0	2.08442	1.33597	0.352232	1.06172	0.279556	0.935708	1.02385	0.785818	0	2.03997	1.42944	0.704898	4.25336	0	0	1.20074	0.285371	1.05122	2.95196	2.70084	0	0.87898
ENSG00000198746.12	GPATCH3	0	0	0	0.604644	0	0	0	0	0	0	0	0	0	0	0	0	0.263939	0.292181	0	0.252769	0	0.170444	0	0	0	0.432484	0	0	0.297656	0.280616	0	0	0	0	0	0	0	0	0	0.364473	0	0.278177	0	0	0.53921	0	0	0
ENSG00000160818.16	GPATCH4	0	0	0	0	0.224177	0	0	0	0	0	0	0	0	0	0	0	0	0	0	0	0	0	0	0	0	0	0	0	0	0	0	0	0	0	0	0	0	0	0	0	0	0	0	0	0	0	0	0
ENSG00000159592.10	GPBP1L1	3.35374	1.97731	1.95969	0.673104	8.25144	3.4987	3.0199	1.19766	2.68537	0	5.06341	6.03468	8.21289	4.00221	1.99155	7.77018	7.3959	6.56986	8.9863	3.95451	5.95352	3.52607	4.70385	8.01707	0	2.30277	7.34535	5.92319	3.64755	3.2821	0.559112	3.072	4.61929	7.07067	3.82183	2.83836	0.292743	11.8242	5.56551	4.57014	1.70741	7.70613	2.44354	6.53422	8.51441	11.9494	1.97867	9.27845
ENSG00000142751.14	GPN2	0	0	0	0	0	0	0.432249	0.22942	0	0	0	0	0	0	0	0	0	0	0	0	0	0	0	0	0	0	0	0	0	0	0	0	0	0	0	0	0	0	0	0	0	0	0	0	0	0.189599	0	0
ENSG00000077585.13	GPR137B	1.52343	1.09461	0.326655	0	0.849541	1.46279	0	0	0.53411	0.629299	0	0	0	0.187263	0	0	0	0.714196	0.228832	0.457715	0	0	4.80203	0.292128	3.13594	0	0.298068	0	0	0.561233	0	0.682772	0	0	0	0	0	0	0.688377	0	0	0	0	1.63277	0.535787	2.37978	0	0.34481
ENSG00000143147.14	GPR161	0.541577	0.813846	0	0.673104	0.311608	0.692129	0	0	0	0	0.251606	0	0	0	0	0.635017	0	0	0	0	0	0	0	0.292128	0	0.468839	0	0	0.297656	0	0.279556	0	0	0	0	0.216034	0.267418	0	0	0	0	0	0.4682	0	0	0.360353	1.50332	0
ENSG00000117262.18	GPR89A	4.45197	3.135	1.47431	0.673104	3.97206	3.9732	0.472086	2.11534	3.26393	1.2586	2.84909	6.32025	1.65788	6.48736	6.95809	4.28757	13.1256	6.50906	11.2185	3.05399	1.51761	6.69171	2.88793	1.53934	1.85972	3.85006	3.07396	2.93324	6.57823	2.03087	2.2651	3.48644	3.89778	4.8868	4.33875	4.02533	2.98069	3.63242	5.71716	2.97624	3.47421	8.70179	1.94106	4.48984	5.54275	6.50238	2.07086	3.50001
ENSG00000188092.14	GPR89B	1.47926	1.02019	1.64199	0.673104	3.3467	3.11022	0.792815	1.83838	6.85554	0	1.65104	5.48316	1.53718	2.16803	8.93423	2.11443	12.2201	8.67993	9.96844	3.28348	1.00337	4.90442	4.84938	2.28377	2.66162	2.80796	2.97553	2.36834	6.38973	2.70977	2.76127	2.52387	3.67186	2.47759	2.76681	1.94083	2.29129	3.29441	6.34399	1.88283	1.42577	6.1378	1.22177	2.84715	5.66257	5.09104	2.41616	2.88021
ENSG00000121957.13	GPSM2	1.5746	0.687692	0.326655	0.604644	1.87394	4.04423	0.864499	0.643738	2.1809	1.743	1.19061	3.75483	2.45426	3.38468	5.99511	2.73787	3.1223	1.91945	3.69224	2.36679	3.25247	0.75803	2.13451	0.716212	2.66162	0.937678	1.18815	0.443465	1.61853	1.03135	2.21359	1.44755	1.57419	3.67702	2.31873	1.68479	2.61197	3.1536	2.45548	4.7552	1.43455	7.38756	1.22177	3.39472	4.47118	2.69562	0.552102	1.50098
ENSG00000158055.15	GRHL3	0	0	0	0	0	0	0	0	0	0	0	0	0	0	0	0	0	0	0	0	0	0	0	0	0	0	0	0.59448	0	0	0	0	0	0	0	0	0	0	0	0	0	0	0	0	0	0.853766	0	0
ENSG00000163873.9	GRIK3	0	0	0	0	0	0	0	0	0	0	0	0	0	0	0	0	0	0	0	0	0	0	0	0	0	0	0	0	0	0	0	0	0	0	0	0	0	0	0	0	1.99783	0	0	0	0.535787	0	0	0
ENSG00000168765.16	GSTM4	0	0	0	0	0	0	0	0	0	0	0	0	0	0	0	0	0	0	0	0	0	0	0	0	0	0	0	0	0	0	0	0	0	0	0	0	0	0	0	0	0	0	0	0	0	0	0	0
ENSG00000137947.11	GTF2B	0	0	0	0	0	0	0	3.73257	0	0	0	0	0.691854	0	0	0	0.35381	0.584363	0.452239	0.276051	0	0	0	0	0	0	0	0	0	0	0	0	0.341285	0	0.27011	0	0	0	0	0	0.725009	0	0.502331	0	0.269605	0	0	0
ENSG00000143774.16	GUK1	0	0	0	0	0	0	0	0	0	0	0	0	0	0	0	0	0	0	0	0	0	0.170444	0.276394	0.798098	0	0	0	0	0	0	0	0	0	0	0	0	0	0	0	0	0	0	0	0	0	0	0	0
ENSG00000049239.12	H6PD	0	0	0	0	0	0	0	0	0	0	0	0	0	0	0	0	0.881688	0	0.228832	0	0	0	0	0	0	0	0	0	0	0	0	0	0	0	0	0	0.585486	0	0	0	0	0	0	0	0	0	0	0
ENSG00000143575.14	HAX1	0	0	0	0	0	0	0	0	0	0	0	0	0	0	0.316699	0	0	0	0.291262	0	0	0.246697	0	0.424084	0	0	0	0	0	0	0	0	0	0	0	0	0	0	0	0	0	0	0	0	0	0	0	0
ENSG00000143630.9	HCN3	0.270788	0	0	0	0	0	0.320729	0	0	0	0	0	0	0	0	0	0	0	0	0	0	0	0	0	0	0	0	0.26688	0	0	0	0	0	0	0	0	0.267418	0	0	0	0	0	0	0	0	0	0	0
ENSG00000116478.11	HDAC1	0.541577	0.65048	0	0	2.7616	0.217621	0.216125	0.414318	0	0.547384	1.04177	0	0	0.898416	0	0.873753	0	0.422015	0.873785	0	0	0.434032	0.276394	0.424084	0	0	0.595107	0	1.29978	2.19001	0	0.298654	0.610937	1.28297	0.784914	0.582353	0	0.676028	0	0	0	0.537934	0.9364	0.384392	0	1.47309	0.989591	0.637803
ENSG00000143321.18	HDGF	0	0	0	0	0	1.12737	0	0	0	0	0	0	0	0	0	0.605658	1.08518	0.422015	3.64775	0	0	0	0.276394	0	0	0	1.18815	0.831783	0	1.68952	1.67734	0.505871	0	0.974327	0.514804	0.227166	1.17097	2.57841	0	0.728946	1.77348	0	0.570742	1.05122	1.60736	0.568798	2.10923	0
ENSG00000119285.10	HEATR1	0	0.750769	0.494341	0	2.05095	1.80449	0.472086	0.22942	0.267055	0	0.251606	0	0.691854	0.355022	0	0	0.791817	0.620888	1.487	0.552102	0.976045	1.00473	0	0.424084	0	0	0.595107	0.443465	1.2452	0.250246	0.559112	0.597308	1.15024	0.377018	0.239396	0	0.802255	0.520122	2.36538	1.09342	1.29707	0.384632	0	0.513576	1.77684	1.8591	0	0
ENSG00000126107.14	HECTD3	0	0	0	0	0	0	0	0	0	0	0	0	0	0	0	0	0	0	0	0	0	0	0	0	0	0	0	0	0	0	0	0	0	0	0.239396	0	0	0	0	0	0	0	0	0	0	0	0	0
ENSG00000162639.15	HENMT1	0.270788	0	0	0	0.311608	0	0	0	0.267055	0	1.33945	1.28271	0	0.916258	0.241586	0	0	0.620888	0.452239	0	0.976045	0.187335	0	0.424084	0	0.322986	0	0	0	0.229511	0	0	0.341285	0.188509	0	0.864135	0.267418	0	0	0.364473	0	0	0	0.863982	1.88723	0.758398	0	0
ENSG00000162669.15	HFM1	0	0	0	0	0	0	0.216125	0	0	0.629299	0	0	0	0	0	0	0	0	0	0	0	0	0	1.27225	0	0.322986	0.7949	0	0	0	1.09536	0	0	0	0	0.216034	0	0.366884	0	0.364473	0	0	0	0	0	0	0	0
ENSG00000054392.12	HHAT	0.263777	0	0	0	0.448354	0	0	0	0.801166	0	0.251606	0	0	0	0	0.59408	0.263939	0.714196	0.873785	0	0.714001	0	1.10558	3.48092	0	0	0.496832	0	0	0	0	0.597308	0.269653	0	0	0.227166	1.00746	0	0.719152	0	0	0	0	0	0	0.189599	0	0.689619
ENSG00000143512.12	HHIPL2	0	0.306634	0	0	0	0	0	0	0.53411	0	0	0.318948	0	0	0.633398	0	0	0.292181	2.34532	0.228857	0	0	0	0	0	0	0	0	0	2.96965	0	1.49327	1.34826	0	0	3.28156	0	0	0	0	1.02422	0	0.285371	0	0.269605	0.170753	0	0
ENSG00000163349.21	HIPK1	0	0.406923	0	0	0.311608	0.513773	0.648374	0.873158	0.548928	1.12838	0	0.438693	0.631504	0.916812	2.21689	1.27003	1.24531	0.422015	0.520094	1.74421	1.1736	0.604476	0.310838	1.43242	0.692705	0.322986	0.297039	0.176584	0	0.229511	0	0	0.539305	0.450448	0.257402	0.355187	0	1.18105	1.97503	0	0	0.73025	0	0	3.49117	0.360353	1.4495	1.31161
ENSG00000127124.15	HIVEP3	0	0	0	0	0	0	0	0	0.563747	0	0.286956	0	0	0	0	0	0	0	0	0.276051	0.524088	0	0	0	0	0	1.09297	0.353169	1.56396	0	0.547682	0	0.225925	1.49821	0	0	0	0	0.688377	0	0	0.278177	0.570742	0	0.269605	0	1.21183	0.966805
ENSG00000143341.11	HMCN1	0	0.343846	0	0	0	0	0	0	0	0	0	0	0	0	0	0	0	0	0	0	0	0	0	0	0	0	0	0	1.56396	0.459022	0	0.298654	0	0	0	0	0	0	0.344189	0	0	0	0	0	0.951753	0	0	0.292993
ENSG00000117305.14	HMGCL	1.01795	0.919902	0	0	0	0.256886	0.432249	0.276959	0.281873	0	0	0.318948	0	0.186709	0	1.27003	0	0.292181	0.228832	0	0.993526	0.170444	0	1.67448	0	0.864969	0.7949	0.706337	0.595312	0	0.827238	1.15833	0.269653	0.450448	1.03702	0.227166	1.06967	0.338014	0.359576	1.23506	0	0.192316	0	0.700813	0	2.07356	0	0
ENSG00000125944.19	HNRNPR	0.505471	0.613268	1.3947	0	0	0.606096	0	0	0.267055	0.547384	1.72918	0	0.285577	0.915703	1.0423	0.623439	0.263939	0.913069	0	0.505539	0	0.417141	0.642334	1.83147	0.583509	0.322986	0.595107	0.533761	0	0	0	0.252936	0.225925	0.261939	0	0.432068	2.62574	0.16834	2.19834	0.364473	0.733794	0.384632	0.285371	1.21439	2.43929	0.360353	0.291488	0
ENSG00000153187.18	HNRNPU	0.995871	0	0	0.604644	1.7441	0.435243	0.216125	0	0.281873	0	0.251606	1.04177	1.26301	0.541731	0.241586	1.50877	0.273746	1.72057	1.42457	0.252769	0	3.56749	0.642334	0	1.96892	0.432484	0	0.710345	1.54286	1.78209	0	1.78595	1.40407	0.261939	0	1.46875	1.51698	1.22368	3.14386	0	1.44334	0.384632	0	0.734799	0	1.77089	1.76393	0.310998
ENSG00000134709.10	HOOK1	0.270788	0	0	0	1.82678	0	0.68821	0	1.42552	0	0.538562	0	1.26301	0.542285	0.316699	0.291251	1.67918	1.33508	2.16536	0	0	0.246697	0.662992	1.11526	0	0	0.594077	1.06752	0	0.709268	0.279556	0.252936	0	0.602365	0	0	0	1.02648	2.0058	0.364473	0.871274	0.653599	0	0.700813	0	1.65066	0.605915	0
ENSG00000143452.15	HORMAD1	0	2.28394	0	0	0	0	0	0	0	0	2.55469	0.438693	10.574	0.935763	0	0.623439	1.59912	2.30494	11.7005	0.528821	0.731482	0.170444	1.58172	0	0.583509	0.755471	0	2.16218	0	1.84283	0	0	1.30454	0	0	0.454332	2.99707	0	0	0	0.290425	0	0	0	0	0	0	0
ENSG00000127483.17	HP1BP3	17.3343	10.8033	16.4274	17.4092	9.63891	18.8097	4.5546	4.65103	7.71866	11.8677	22.351	8.95676	11.589	14.5308	4.14958	21.2748	16.2896	18.8127	19.274	3.5136	16.4173	15.5296	4.0753	29.6911	12.2878	14.7649	15.7787	4.79495	18.9683	16.0108	3.57708	7.93687	18.4672	12.4284	3.85255	15.2466	13.4814	26.6106	17.5427	6.39251	4.74493	18.2027	9.17922	27.1107	16.8662	24.2719	8.96652	10.2835
ENSG00000153936.16	HS2ST1	0	0	0.494341	0	3.07796	0.217621	0.216125	0.643738	1.41071	0	0.790169	0.637895	2.89809	0.710598	0.316699	0.291251	1.94312	0.84403	2.18164	0	2.31359	0.680729	0	2.54768	0	0.645973	1.5898	0.353169	2.3019	6.60421	0.559112	0.298654	0.225925	1.39324	0	0.908664	0.292743	0	2.09591	0	0	0.537934	0.97053	0.768784	1.07157	0	0	1.79397
ENSG00000132196.13	HSD17B7	0	0	0	0	0	0	0	0	0	0	0.573911	0	0	0	0	0	0	0	0	0	0	0	0	0	0	0	0	0.3276	0	0	0.279556	0	0	0	0	0	0	0	0	0	0.28164	0	0	0	0.267894	0	0	0
ENSG00000081870.11	HSPB11	0	0.306634	0	0.673104	0	0	0	0.276959	0.267055	0	0	0	0	0	0	0.302829	0	3.51019	0.457664	0	0	0	0	0	0	0	0	0	0.561837	0	0	0	0	0.523879	0	0	0	0	0	0	0	0	0	0	0	0	0	0
ENSG00000142798.18	HSPG2	0	1.87702	0.653311	2.62396	3.96562	1.37675	1.1603	2.07383	0.594723	2.38698	0.251606	1.07659	0	1.44015	0.316699	0.605658	0	0	1.03748	0	4.28401	1.09023	0.276394	0.823132	0	0.864969	1.68911	0.26688	0.561837	0.250246	0	0.298654	0.677776	1.80685	1.0063	0.432068	0.585486	2.45004	3.57509	0.87059	0.572065	1.20074	0	3.68707	1.48925	3.58106	1.57257	0.966805
ENSG00000276975.2	HYDIN2	0	0	0	0	0	0	0	0	0	0	0.251606	0	0	0	1.43495	0	0	0	2.0071	0	0	0	0.276394	0	0	0	0	0	0	0	0	0	0	0	0.257402	0.216034	0	0	0	0	0	0	0.285371	0	0	0.183584	0	0
ENSG00000178922.16	HYI	0	0	0	0	0	0	0	0	0.267055	0	0	0	0	0.168313	0	0.332188	0.273746	0	0	0	0	0	0	0	0	0	0.594077	0	0	0	0	0	0	0.188509	0	0	0	0.16834	0.344189	0	0	0	0	0	0	0	0	0
ENSG00000067704.9	IARS2	1.30381	0.65048	0.326655	0	1.07372	0.606096	1.12046	0.22942	1.72356	0	1.08784	1.40245	0.905678	0.336626	1.52463	0.332188	0.35381	0	2.10293	0.252769	0.731482	0.562004	1.14002	0.823132	1.16702	1.33381	1.38898	0.92208	0	0.760374	0.827238	0.429836	2.60533	0.602365	0	0	1.41307	0.535223	2.16756	4.4285	1.71619	0.268967	0.285371	0.734799	0.269605	1.08787	0.329864	0.637803
ENSG00000116237.15	ICMT	1.86747	0.306634	0	0.673104	0.672531	0	0	0	0.548928	0.547384	0.573911	0	0	0.186709	0.633398	0.635017	1.62286	0	1.49243	0.228857	1.22825	0.528223	0.331496	1.91336	0.692705	1.40652	1.09297	0.176584	2.57848	0.500492	1.65448	0	0.269653	1.57164	0.239396	0	0	0.85947	1.73633	3.55791	0	0.73946	0.4682	0.384392	2.44272	0.929151	0.291488	1.31161
ENSG00000169991.10	IFFO2	0	0	0	0	0.224177	0	0	0	0	0	0	0	0	0	0	0	0	0	0	0	0.524088	0	0	0	0	0	0	0	0	0	0	0	0	0	0	0	0	0.366884	0	0	0	0	0.4682	0	0	0	0	0
ENSG00000163565.18	IFI16	0	0	0	0	0	0	0	0	0	0	0	0	0	0	0	0	0	0	0	0	0	0	0	0	0	0	0.297039	0	0	0	0	0	0	0	0	0	0	0	0	0	0	0	0	0	0	0	0	0
ENSG00000137965.10	IFI44	0	0	0	0	0	0	0	0	0	0	0	0.438693	0	0	0	0	0	0	0	0	0	0	0	0	0	0	0	0	0	0	0	0	0	0	0	0	0	0	0	0	0	0	0	0	0	0	0	0
ENSG00000126709.14	IFI6	0.241694	0	0	0	0.311608	0	0	0	0	0	0.538562	0	0	0	0	0	0	0	0	0	5.29501	0	0	0	0	0	0	0.655199	0.297656	0	0.547682	0	0	0	0	0	0	0	0	0	0	0	0	0	0	2.55574	0	0
ENSG00000185436.11	IFNLR1	0	0	0	0	0	0	0.536854	0	0	0	0	1.11833	0	0.186709	0	0.332188	0	0.84403	0	0	0.262044	1.09787	0	0.424084	0.692705	0.864969	0	0	1.4548	0.229511	0	0	0	0.261939	0	0	0	0.351782	0.719152	0	0	0.537934	0	1.54073	0	1.05018	0	0.34481
ENSG00000163395.16	IGFN1	0	0	0	0.673104	0	0	0	0	0	0	0	0	0	0	0	0	0	0	0	0	0	0	0	0	0	0	0.297039	0	0	0	0	0	0	0	0	0	0	0	0	0	0	0	0	0	0	0	0	0
ENSG00000143061.17	IGSF3	0	0	0	0	0	0	0	0	0	0	0	0	0	0	0	0	0	0	0	0	0	0	0	0	0	0	0	0	0	0	0	0	0	0	0	0	0	0	0.567498	0	0	0	0	0	0.267894	0	0	0
ENSG00000085552.16	IGSF9	0	0	0	0	0	0	0	0	0	0	0	0	0	0	0	0	0	0	0	0	0	0	0	0	0	0	0	0	0	0	0	0	0	0.565528	0	0	0	0	0.719152	0	0	0	0	0	0	0.189599	0.276051	0
ENSG00000263528.7	IKBKE	0	0	0	0	0	0.256886	0	0	0	0	0	0	0	0	0	0	0	0.620888	0	0.252769	0.262044	0	0.276394	0	0	0	0	0	0	0.280616	0	0	0.269653	0	0	0	0	0	0.359576	0	0	0	0	0	0	0	0	0
ENSG00000142677.3	IL22RA1	0	0	0	0	0	0	0	0	0	0	0	0	0	0	0	0	0	0	0.291262	0	0	0	0	0	0	0	0	0	0	0	0	0	0	0	0	0	0	0	0	0	0	0	0	0.513576	0	0	0	0
ENSG00000160712.12	IL6R	0	0	0	0	0	0	0.216125	0.22942	0.281873	0	0	0	1.59753	0.186709	0	0	0.70762	0.422015	0.457664	0.276051	0.234719	0	0.331496	0	0	0	0	0.982799	0.297656	0.479757	1.38635	0.895961	0	2.17881	0.478793	0	0.827579	0	0	0	0	0.192316	0	0.513576	0	0.562783	0	0
ENSG00000143621.16	ILF2	4.13806	1.26375	0.406021	3.36552	2.05571	2.85963	1.08062	1.33502	3.3865	2.324	3.1993	3.11404	3.5638	1.44015	4.79922	0.873753	2.56087	1.95597	9.56507	0.228857	0.704157	4.93925	1.98898	1.24722	0	1.58365	1.49034	1.57171	7.60145	2.17891	3.58851	1.88682	3.073	5.14344	2.29543	3.49759	1.12032	2.93996	4.95185	0	2.15956	5.32524	2.00932	2.62593	4.07148	3.99795	1.84862	0.292993
ENSG00000204084.12	INPP5B	0.541577	0	0	0.673104	0	0.256886	0	0	0	0	0.860867	0	0.345927	0.541731	0.241586	0	0.627556	0	0.969621	0	0	0	0	0.292128	0	0	0.297039	0	0	0	0	0	0	0	0	0.216034	0.878229	0.33668	0.688377	0	0	0.384632	0	0	0.269605	0	0	0.310998
ENSG00000127054.20	INTS11	0.241694	0	0	0	0	0	0	0	0	0	0	0	0	0	0	0	0	0.292181	0.452239	0	0	0	0	0.399049	0	0	0	0	0	0	0	0	0	0	0	0	0	0	0.344189	0	0	0	0	0.513576	0	0.183584	0	0
ENSG00000143624.13	INTS3	3.06087	1.22654	0.494341	0	0.847392	1.51585	0.969104	0	0.548928	1.2103	1.66176	0.963762	0.856731	0.523335	6.31013	1.87569	3.66979	1.95597	3.99059	0	0	2.41026	1.26401	1.00834	0.583509	0	2.48092	1.36554	2.11339	2.48026	0	0.505871	2.1414	4.51484	1.83464	0.582353	0.292743	0.703563	3.36717	0.364473	1.02422	4.06489	0.502331	0.384392	6.88222	1.63783	1.77937	0.982613
ENSG00000143493.12	INTS7	0.483388	0.613268	0	0	1.07372	0.217621	2.5298	0.506379	1.39455	0.581	0.573911	0.24094	0.620102	0.355022	0.966343	1.18816	1.07537	1.55823	1.26359	1.60974	0.94872	1.00473	1.90635	0	0.583509	1.40144	0.79387	1.18896	0.595312	2.60756	1.10679	0.804525	0.269653	0.528934	0.239396	0.798387	1.03279	0.16834	4.98262	0	0.28164	1.67124	0	0.734799	0.825085	0.929951	0.329864	1.53698
ENSG00000117408.10	IPO13	0	0	0	0	0	0	0	0	0	0	0	0	0	0	0	0	0	0	0	0	0	0	0	0	0	0	0	0	0.297656	0	0	0	0	0	0	0	0	0	0	0	0	0	0	0	0	0.189599	0	0.655807
ENSG00000198700.9	IPO9	0.812365	7.37614	3.52208	5.17945	3.2078	2.36504	2.80067	1.33726	2.83623	0.581	3.44763	4.11697	6.37396	2.75099	1.2668	5.01067	5.25182	4.95083	5.87658	1.01045	2.68357	2.22952	2.92149	5.07352	3.82864	2.51626	3.97023	5.07542	5.03538	3.81297	2.81278	1.75563	3.82615	2.441	2.28802	1.02555	0.292743	2.25016	11.0493	1.77895	1.70741	0.961579	2.29469	4.34398	2.95196	4.86295	1.75643	4.27746
ENSG00000197429.10	IPP	0.534565	0.687692	0	0	0.672531	0.217621	0	0.553919	0.815984	1.162	0	0.679634	0	0	0	0.664375	0	0	0.748926	0	0	0	0	0	0	0	0	0	0	0.709268	0.547682	0	0	0.261939	0	0.216034	0	0	1.03257	0.87059	0	0.278177	0	0.768784	0.825085	0.734336	0	0
ENSG00000183856.10	IQGAP3	0	0	1.48302	0	1.0244	0	0	0	0.281873	0	1.84266	0	0	0	0.316699	0.302829	0.801624	0	0.22612	0	0	0.357779	0	0	0	0	0.298068	0.3276	0.649888	0	0.827238	0	0.269653	0	0	0.432068	1.99855	1.5204	0.688377	0.364473	0	0.461283	0	0.350407	0.950041	0	0	0
ENSG00000117595.11	IRF6	0	0	0	0	0	0	0	0	0.267055	0	0	0	0	0	0	0	0.527878	0	0	0	0	0	0	0	0	0	0	0	0	0	0	0	0	0	0.239396	0	0	0	0	0	0.84492	0	0	0	0	0	0	0
ENSG00000143319.16	ISG20L2	0	0	0	0	0	0.388474	0	0	0	0	0	0	0	0	0	0	0	0	0	0	0	0	0	0	0	0	0	0	0	0	0	0	0	0	0	0	0	0	0	0	0	0	0	0	0	0	0	0
ENSG00000142856.16	ITGB3BP	0.534565	0.306634	0	0	1.56019	0.256886	0	0	1.78417	0	1.3748	0.24094	0	0.336626	0	0	0.527878	0	0.746213	0	0.741326	0.357779	0	4.99205	1.38541	0.322986	0	0.3276	1.00212	0.510128	0.279556	0	1.29351	0.523879	0.239396	0.659234	0.267418	0.16834	1.61545	0	0.580849	3.95786	0	0.350407	0.269605	0.556767	0.329864	0
ENSG00000143772.9	ITPKB	0	0	0	0	0	0	0	0	0	0	0	0	0.691854	0	0	0	0	0	0	0	0	0	0	0	0	0	0	0	0	0	0	0	0	0	0	0	0	0	0	0	0	0	0	0	0	0	0	0
ENSG00000116679.15	IVNS1ABP	0.241694	0	0	0	0.311608	0	0	0	0	0	0.251606	0	0	0.168313	0	0	0	0	0	0	0	0	0	0	0	0	0	0	0	0	0	0	0	0	0	0	0.292743	0	0	0	0	0	0	0	0	0	0	0.292993
ENSG00000162434.11	JAK1	0	1.03154	0.326655	0	0.535785	0.692129	0	0	0	0	0.286956	0.877386	0	0.560127	0.483172	0	0.35381	0	0.454952	0	0	0.170444	0.587232	0.424084	0	0.322986	0.496832	0.3276	0.352232	0.280616	0.547682	0.551589	0.269653	0.261939	0	1.39187	0.447303	0	1.04795	0	0	1.04744	0	0.384392	0.267894	0.183584	0	0
ENSG00000081692.12	JMJD4	0	0	0	0	0	0	0	0	0	0	0	0	0	0	0	0	0	0	0	0	0	0	0	0	0	0	0	0	0	0	0	0	0.451851	0	0	0	0	0	0	0	0	0	0	0	0.269605	0	0	0
ENSG00000132854.18	KANK4	0	0	0	0	0	0	0	0	0	0	0	0	0	0	0	0	0	0	0	0	0.524088	0	0	0	0	0	0	0	0	0	0	0	0	0	0	0	0	0	0.911687	0	0	1.30502	0	0	0	0	0	0
ENSG00000189337.16	KAZN	1.58266	0	0.406021	0	0	0	0	0.22942	0	0	0	0	0	0	0	0.291251	0	0	0.228832	0	0.234719	0.732448	0	0	0	0	0	0	0	0	0	0	0	0.340425	0	0	0.267418	0	0	0	0	0.931775	0	0	0.53921	0	0	0.34481
ENSG00000069424.14	KCNAB2	0.263777	0	0	0	0	0	0	0	0	0	0	0.481881	0	0	0	0	0.263939	0	0	0.252769	0	0	0	0	0	0	0	0	0	0	0	0	0	0	0	0	0	0	0.344189	0	0	0	0	0	0.269605	0	0	0
ENSG00000116396.14	KCNC4	0	0	0	0	1.78436	0.217621	0	0	0	0	0	0	0	0	0	0	0	0	0.22612	0	0.262044	0.246697	0.552789	0	0	0	0	0	0	0	0	0.597308	0	0.261939	0	0.864135	0	0	0	0	0	0	0	0	1.09469	0	0	0
ENSG00000171385.9	KCND3	0	0	0	0	0	0	0	0	0	0	0	0	0	0	0	0	0	0	0	0.91543	0	0	0	0	0	0	0	0	0	0	0	0	0	0	0	0	0	0	0	0	0	0	0	0	0	0	0	0.689619
ENSG00000143473.12	KCNH1	0	2.63913	0	0	0	3.45314	0	0	0	0.547384	0	0	1.48823	0	0	1.78224	0.537685	0	12.8756	0.252769	0	4.6981	0	4.32909	0	0	5.46381	0.26688	2.73348	11.9779	0	0	0	0	0	0	7.52901	0	5.63012	0	0	0	0	0.513576	0.269605	0	0.329864	0.585987
ENSG00000177807.9	KCNJ10	0	0	0	0	0	0	0	0	0	0	0	0	0	0	0	0	0	0	0	0	0	0	0	0	0	0	0	0	0	0	0	0	0	0	0	0	0	0	0	0	0	0	0	0	0	0	0	0
ENSG00000082482.13	KCNK2	0	0.406923	0	0.673104	0	0	0.432249	0.968237	0	0.629299	0.800889	0	0	0	0	0.291251	0	0	5.77428	0.552102	1.69005	0	0.310838	0.424084	0	0	2.18285	0	0.892968	1.42817	0	0	0	0	0	0	0	0	0	0	0.28164	0	0	0	0	0.568798	0.276051	0
ENSG00000143603.18	KCNN3	0	0	0	0	0	0	0	0	0	0	0	0	0	0	0	0	0	0	0	0	0	0	0	0	0	0	0	0	0	0	0	0	0	0	0	0	0	0	0	0	0	0	0	0	0.269605	0	0	0
ENSG00000162687.16	KCNT2	0	0	0	0	0.311608	0	0	0	0.281873	0	0	0	1.2402	0	0	0	0	0	0	0	0	0	0	0	0	0.322986	0.298068	0	0	0	0	0	0	0	0	0	0	0	0.688377	0	0	0	0	0	0	0	0	0
ENSG00000136636.12	KCTD3	2.48319	2.32115	0.900362	1.81393	3.3536	3.06467	1.71517	0.276959	2.47893	1.12838	1.11247	3.99722	1.42788	2.03984	3.60922	5.73225	3.17862	1.62727	15.8575	0.686572	2.42153	1.47254	2.16895	2.14864	1.75053	0.432484	2.0856	2.43463	1.59743	6.95139	0.279556	2.0846	6.5127	1.88509	2.58884	1.54563	2.80081	2.09826	0.688377	0.728946	1.4588	1.97001	3.37979	3.77911	1.075	7.70333	1.7948	3.29495
ENSG00000004487.16	KDM1A	12.6689	9.7172	9.96639	12.0359	24.2314	20.3309	7.10622	4.37105	17.0679	11.4581	17.688	18.3185	5.08958	16.5678	3.81831	27.4257	18.1166	22.8991	23.6128	13.2659	24.0541	14.2578	23.5563	31.4093	9.40781	7.34078	28.0773	14.4009	18.6372	3.68856	10.7427	5.33302	13.7348	22.945	8.11716	5.24813	16.8383	31.5773	29.4175	5.81084	11.3962	28.7515	9.53315	21.2266	21.1474	31.0942	8.05325	11.9853
ENSG00000066135.12	KDM4A	0	0	0.979966	0	0	0	0.536854	0	0.548928	0	0.286956	0	0	0.168313	0	0.908487	0	0	0.454952	0.252769	0	0	0	0	0	0	0	0	0.352232	1.53185	0	0	0.225925	0	0.239396	0	0	0.550325	1.28665	0	0	0.278177	0	0	0.412543	0.341506	0	0
ENSG00000117139.16	KDM5B	1.76512	1.91423	2.44508	0.673104	5.04148	0.692129	1.40135	5.51737	1.60233	5.22475	2.8063	5.6337	0	2.39375	0.633398	6.75735	1.14563	6.37098	5.21536	0.986536	1.90728	4.18122	3.88242	8.39426	2.91755	2.16242	4.16899	3.37827	2.36887	7.26619	1.43786	2.423	2.36732	2.51924	3.30492	3.87852	3.16058	2.26526	6.17695	0.87059	5.81975	1.3072	4.27003	1.24837	9.33607	2.32765	2.03998	3.55183
ENSG00000121774.17	KHDRBS1	6.78285	3.14076	0.494341	2.62396	7.36163	7.21623	2.06463	1.37954	4.48168	6.27122	8.5036	3.44281	1.2402	4.84488	0.241586	6.402	3.73592	3.1247	5.25147	4.71156	4.77008	2.14667	5.0638	6.24245	3.61025	2.08928	8.63075	3.7946	4.33964	3.58346	3.05225	0.429836	1.17815	3.60864	3.00621	4.70231	3.69541	6.48664	8.8918	2.55131	3.13318	6.10582	2.29484	5.30992	9.89326	5.23012	2.70764	3.70728
ENSG00000235750.9	KIAA0040	0	0	0	0	0	0	0	0	0	0	0	0	0	0	0	0	0	0	0	0	0	0	0	0	0	0	0	0	0	0	0	0	0	0.340425	0	0	0	0	0	0	0	0	0	0	0	0	0	0
ENSG00000142687.17	KIAA0319L	0	1.77096	0.812043	3.16014	2.63176	2.64322	2.04281	0.553919	0.563747	0.547384	0.400444	3.55708	0.917081	0.841565	1.43327	2.63284	3.99986	3.76985	2.07224	2.17802	1.49029	0.493394	1.30533	1.30047	1.38541	2.41226	1.78223	1.24968	0.595312	0	3.32038	1.57873	0.610937	1.84369	0.496798	1.29273	0.534836	1.6874	0.344189	0	0	1.3072	0.856112	0.700813	3.76078	0.556767	0.329864	3.17321
ENSG00000132680.10	KIAA0907	2.38802	3.62769	3.61064	1.20929	3.02865	5.95098	2.62642	2.39756	1.63197	0.629299	2.69281	5.8954	5.35378	4.90118	3.18576	5.79014	2.76436	8.95986	8.41358	0.828154	1.26541	5.20782	3.71623	2.76153	3.71945	5.40243	3.47031	10.6454	4.49464	1.2194	1.94546	5.413	0.682569	5.37384	2.61426	3.60787	5.64331	7.14757	2.3346	0.87059	5.0617	2.80534	3.34566	6.59544	15.6268	22.3904	3.13668	3.21141
ENSG00000116299.16	KIAA1324	0	0	0	0	0	0	0	0	0	0	0	0	0	0	2.55068	0	0	0.422015	0	0	0	0	0	0	0	0.645973	0	0	0	0	0	0	0	0	0	0	0	0	0	0	0	0.547144	0	0	0	0	0	0
ENSG00000162522.10	KIAA1522	0	0	0	0	0	0	0	0	0	0	0	0	0	0	0	0	0	0	0	0	0	0	0	0	0	0	0	0	0	0	0	0	0	0	0.514804	0.227166	0	0	0	0	0	0	0	0	0	0	0.276051	0
ENSG00000116685.15	KIAA2013	0	0	0	0	0	0	0	0	0	0	0	0	0	0	0	0	0	0	0	0	0	0.187335	0	0	0	0	0	0	0	0	0	0	0	0	0	0	0	0	0	0	0	0	0	0	0	0	0	0
ENSG00000118193.11	KIF14	1.5746	4.63653	1.46535	3.83324	2.99483	2.97113	1.93821	2.85415	3.38516	2.85245	3.88342	5.12247	2.57496	2.1513	1.84217	1.19974	1.05576	6.60237	6.00958	2.16185	0.524088	3.76457	1.86503	4.06518	3.24513	2.55812	5.65624	3.80018	4.61619	4.3009	1.11822	1.05746	2.90663	3.38354	2.91508	0.571221	3.80827	6.77092	9.56479	1.96401	0.572065	1.65282	3.84814	4.96943	3.2464	1.09389	4.3799	2.43177
ENSG00000117245.12	KIF17	0	0	0	0	0	0	0	0	0.876596	0	1.26131	0	0	0	0	0	0	0	0	0	0	1.54984	0	0	0	0	0	0	0	0.561233	0	0	0	0.261939	0	0.227166	0	0	0.688377	0	0	0.278177	0	0.513576	0	0	0	0
ENSG00000054523.17	KIF1B	2.84932	3.31548	0.326655	1.88239	0.984138	3.41145	1.20013	2.07607	2.00543	1.743	0.538562	0	3.42029	1.47749	0.874983	2.2025	2.6941	4.84928	5.5346	0.528821	1.26541	1.02162	0.60789	4.27542	1.38541	2.48497	4.07175	1.53812	4.47357	2.96002	1.37492	0.429836	2.1693	3.99602	0.478793	2.12799	2.61197	3.46141	2.67879	1.45789	2.88457	1.77769	0.787702	3.96635	2.83043	1.80858	0.276051	4.4374
ENSG00000116852.14	KIF21B	0	0	0	0	0	0	0	0	0	0	0	0	0	0	0	0.291251	0	0	0	0	0	0.187335	0	0	0	0	0	0	0	0	0	0	0	0	0	0	0	0	0	0	0	0	0	0	0	0	0	0
ENSG00000162849.15	KIF26B	0	0	0	0	0	0	0.432249	0	0	0	0	0	0.345927	0	0	0.664375	0	0	0	0	0	0.340888	0	0	0	0	0	0	0.947544	0	0	0	0	0	0	0	0	0.33668	0	0	0	0	0	0.700813	0.412543	0	0.567539	0
ENSG00000142945.12	KIF2C	4.89224	5.39307	3.45167	2.5555	3.53061	3.79606	2.37845	1.33502	8.68416	1.2586	5.46704	8.87585	3.81517	5.98298	2.15803	2.3879	14.0997	6.71995	16.1724	1.92651	11.727	5.36403	4.24836	9.3712	1.96892	2.91238	10.3145	2.57607	9.25346	2.44989	7.63396	0.804525	1.55837	10.3659	3.27102	7.80471	7.70889	8.34639	20.4417	0.364473	1.12656	5.49341	5.321	13.2798	13.2218	14.1748	5.46816	5.86416
ENSG00000075945.12	KIFAP3	0.769248	0.813846	0.494341	0.673104	0.849541	1.63364	0.68821	0.276959	0.548928	0	0	0	0.285577	0.729549	0	0.59408	0	1.66379	0.969621	0	0.966201	0.170444	0.310838	1.27543	2.66162	0.322986	0.79387	1.74829	0.859493	0	0.279556	0	0.808958	0.864304	0.257402	0	0	0	2.11129	0	0	0.470492	1.50714	1.02715	2.41275	0.373183	0.291488	0.585987
ENSG00000183853.17	KIRREL	0	0	0	0	0	0.256886	0	0	0.267055	0	0	0	0	0	0	0	0	0	0	0	0	0.749339	0	0.424084	0	0.322986	0.297039	0	0	0.280616	0.827238	0	0.341285	0	0.239396	0.908664	0.534836	0	0	0	0.28164	0	0	1.02715	1.61421	0	0	0.310998
ENSG00000171872.4	KLF17	0	0	0	0	0	0	0	0	0	0	0	0	0	0	0	0	0	0	0	0	0	0	0	0	0	0	0	0	0	0	0	0	0.56721	0	0	0	0	0	0	0	0	0	0	0	0	0	0	0
ENSG00000117153.15	KLHL12	0.483388	0.306634	0	0	0.401187	0	0	0.691278	0	0.581	0	0	0	0.186709	0	0	0	0	0.520094	0	0	0.170444	0	0	0	0	0	0.176584	0.297656	0	0	0.252936	0.269653	0	0	0.4432	0	0	0	0	0	0	0	0	0.412543	0	0	0
ENSG00000187961.13	KLHL17	0	0	0	0	0	0	0	0	0	0	0	0	0	0	0	0	0	0	0	0	0.234719	0	0	0	0	0	0.596137	0	0	0	0	0	0	0	0	0	0	0	0	0	0	0	0	0	0	0	0	0
ENSG00000076321.10	KLHL20	0.241694	1.71923	0	0	1.78651	0.692129	0.255961	0.830878	0.548928	0	0.251606	0.24094	0	0.749054	0.874983	0.605658	0	1.00638	2.17079	0	0.714001	1.95829	0	0	0	0.322986	0.7949	0.92208	1.61853	0.229511	0	0.298654	0	1.99055	0.779616	0.710375	0	1.74647	2.79967	0	0.853705	0.192316	0.502331	1.89113	1.34118	1.45504	0	0.585987
ENSG00000162413.16	KLHL21	0	0	0	0	0.802374	0	0	0	0.267055	0	0	0	0	0.504939	0	0	0.35381	0	0.452239	0	0.262044	1.00473	0	0	0	0	0	0	0	1.00098	0.547682	0	0	0.261939	0	0.681498	0.292743	0.338014	0.688377	0	0	0	0	0	0.269605	0	0.552102	0
ENSG00000117009.11	KMO	0	0	0	0	0	0	0	0	0	0	0	0	0	0	0	0	0	0	0	0	0	0	0	0	0	0	0	0	0	0	0	0.252936	0	0	0	0	0	0	0	0	0	0	0	0	0	0	0	0
ENSG00000025800.13	KPNA6	1.23055	0.343846	0.406021	1.88239	0.448354	0.692129	0.320729	0.735799	1.14365	0	1.47757	0	0.345927	0.187263	0	0	0.527878	0.422015	0	0	0.496763	0.340888	0.60789	1.11526	0	0.755471	0	0.529753	0.649888	0.229511	0.279556	0	0.991156	2.10563	0.27011	1.71818	0.292743	0	0.344189	0	0	0	0	2.24154	1.63219	1.10672	0.659727	0.292993
ENSG00000159166.13	LAD1	0	0	0	0	0.401187	0	0	0	0	0	0	0	0	0	0	0	0	0	0	0	0	0	0	0	0	0	0	0	0	0	0	0	0	0	0	0	0	0	1.135	0	0	0	0	0.513576	0	0	0	0
ENSG00000196878.14	LAMB3	0	0	0	0	0.401187	0	0.255961	0	0	0	0.251606	0	0	0	0	0	0	1.24178	0	0	0	0	0.276394	0	0	0	0	0	0	0	0	0.505871	0	0	0.257402	0	0	0	0.703765	0	0.28164	0	0	0.350407	0	0	0.329864	0
ENSG00000135862.5	LAMC1	0.725083	0.406923	0.494341	0.604644	3.70762	2.25474	0.432249	0.45884	0.801166	1.12838	0	0.679634	0	0.542285	1.11825	1.47941	3.0283	1.85041	2.63387	0.757678	0.496763	1.11476	0.331496	1.00834	0.692705	0	1.18918	0.796633	2.10469	0.250246	0.279556	0.298654	2.51059	1.02128	0.736195	1.35848	0.292743	1.5204	1.78249	0	0.733794	0.278177	1.03894	1.50358	1.3446	1.61898	0.567539	1.5866
ENSG00000058085.14	LAMC2	0	0	0	0	1.16115	0.388474	0.216125	0.276959	0	0	0	0	0	0.187263	0	0	0	0	0	0.504909	0	0	0	0	0	0	0	0	0	0	0.610622	0.252936	0	0	0	0	0	0.183442	1.25588	0	0	0	0	0	0	0.189599	0.329864	0
ENSG00000143815.14	LBR	0	0	0	0	1.0244	0	0.962188	0	0	0.629299	0.286956	0	0	0.186709	0.316699	0.302829	0.35381	0.714196	0.678359	0	0.469438	0	0	0.798098	0	0.468839	0.298068	0	1.19062	0	0	0.72849	0.682569	0.377018	0.239396	0	0	0.535223	7.82846	0	0.28164	0	0	0	0.680436	0.740351	0	0
ENSG00000182866.16	LCK	0	0	0	0	0	0	0	0	0	0	0	0	0	0	0	0	0	0	0	0.276051	0	0	0	0	0	0	0	0	0	0	0	0	0	0	0	0	0	0	0	0	0	0	0	0	0	0	0	0
ENSG00000157978.11	LDLRAP1	0.270788	0	0	0	0	0	0	0	0.53411	0	0.251606	0	0	0	0	0	0.627556	0	0.228832	0	0	0	0	0	0	0	0	0	0.297656	0	0	0	0	0	0.257402	0	0.267418	0	0.344189	0	0	0.662808	0	0	0.267894	0	0	0
ENSG00000116678.19	LEPR	0	0	0	0.604644	0.224177	0	0	0	0	0	0	0	0	0	0	0.302829	0	0	0	0	0	0	0	0	0	0.432484	0	0	0	0	0.547682	0	0	0	0	0	0	0	0	0	0	0	0	0	0	0	0	0
ENSG00000213625.8	LEPROT	0	0	0	0	0	0.217621	0	0	0	0	0	0	0	0	0	0	0	1.46492	0	0	0	0	0	0	0	0	0	0	0	0	0	0	0	0	0	0	0.267418	0	0	0	0	0	0	0	0	0	0	0
ENSG00000116977.18	LGALS8	0	0	0	0	0	0	0	0	0	0	0	0	0.285577	0	0	0	0	0	0	0	0	0	0	0	0	0	0	0	0	0	0	0	0	0	0	0	0	0	0	0	0	0	0	0	0	0.183584	0	0
ENSG00000133067.17	LGR6	0	0	0	0	0	0	0.752979	0	0	0	0	0	0	0	0	0	0	0	0	0	0	0	0	0	0	0	0	0	0	0	0	0	0	0	0	0	0	0	0	0	0	0.278177	0.4682	0	0	0	0	0
ENSG00000121454.5	LHX4	0.725083	0	0	0	0	0	0	0	0	0	0	0.438693	0	0	0	0	0	0	0	0	0	0	0	0	0	0	0	0	0	0	0	0	0	0	0	0.432068	0	0	0	0	0	0	0	0	0	0	0	0
ENSG00000162624.14	LHX8	0	0	0	0	0	0	0	0	0	0	0	0	0	0	0	0	0	0	0	0	0	0	0	0	0	0	0	0	0	0	0	0	0	0	0	0.355187	0	0	0	0	0	0	0	0	0	0	0	0
ENSG00000183814.15	LIN9	0.798342	0.957114	0.812043	0.604644	3.56827	0.731394	0.68821	0.276959	0.815984	0	1.43478	0.24094	3.15752	0.692202	0.79987	1.19974	1.24531	1.53396	1.49243	0.939342	1.75233	0	1.28467	0.823132	0	0	0	0.92208	0	0.959514	0.827238	1.4873	0.539305	0.377018	0.27011	1.25272	1.095	0.550325	2.97682	0	0.725009	0.278177	0.97053	1.72796	0.269605	2.16973	0.329864	1.55499
ENSG00000224209.7	LINC00466	0.241694	0	0	0	0	0	0	0	0	0	0	0	0	0	0	0	0	0	0	0	0	0	0	0	0	0	0	0	0	0	0	0	0	0	0	0	0	0	0	0	0	0	0	0	0	0	0	0
ENSG00000153363.12	LINC00467	0	0	0	0	0	0	0	0	0	0	0.286956	0	0	0.336626	0	0	0	0	0.22612	0	0	0	0	0	0	0	0	0	0	0	0	0.252936	0	0	0	0	0	0	1.72094	0	0	0	0	0	0	0.51226	0.276051	0.689619
ENSG00000274020.2	LINC01138	0	0	0	0	0	0.256886	0	0	0	0	0	0	0	0.186709	0	0	0	0	0	0	0	0	0	0	0	0	0	0	0	0	0	0	0	0	0	0	0	0	0	0	0	0	0	0	0	0	0	0
ENSG00000271601.3	LIX1L	0.725083	0	0	0	0	0	0	0	0	0	0.903657	0	0	0	0	0	0	0	0	0	0	0	0	0	0	0	0	0	0	0.250246	0	0	0.225925	0	0	0	0	0	0	0	0	0	0	0	0	0	0	0
ENSG00000160789.19	LMNA	0.483388	0	0	0	0	0	0	0	0.594723	0.547384	0	0	0	0	0	0	0.273746	0	0.678359	0	0.262044	0	0	0	0	0	0	0	0.704464	1.8732	0	0.298654	0	0.450448	0.27011	0	0	0	0	0	0	0.268967	0	0.513576	0.267894	0.170753	1.48788	0
ENSG00000143013.12	LMO4	0	0	0	0	0	0	0	0	0	0	0	0	0	0	0	0	0	0	0	0	0	0	0	0	0	0.937678	0	0	0	0	0	0	0	0	0	0	0	0	0	0	0	0	0	0	0	0	0	0
ENSG00000171517.5	LPAR3	0	0.306634	0	0	0	0	0	0	1.11268	0	6.11253	0	0	0	0.966343	0	2.75455	0	0.977758	0.252769	0	0.357779	12.5927	0	0	2.04742	0	0	0	0	0	0	0	2.30425	0	0	0	0.8417	0	0	0	0.268967	0	0	26.4967	0	0	0
ENSG00000123684.12	LPGAT1	4.9946	11.0409	0.653311	2.69242	4.5057	0.770659	1.02384	0	0.563747	0	2.87372	2.23263	6.49609	1.8119	18.5436	17.9088	11.9996	22.1363	48.9603	0.457715	10.6012	10.0653	6.36137	3.3426	3.35433	0.901323	3.57064	3.17852	3.5471	13.3425	5.52254	12.0112	0.269653	5.87149	1.23299	20.3865	3.13112	8.86784	13.1091	0.728946	3.13986	25.8584	0.285371	1.53757	1.61078	2.08559	2.15554	6.96402
ENSG00000121931.15	LRIF1	0	0.343846	0.326655	0	0	0	0.216125	0	0	0	0	0	0	0	0	0	0	0	0	0	0	0	0.662992	0	0	0	0	0	0	0	0	0	0.225925	0	0	0	0	0	0	0	0	0.268967	0	0	0	0	0	0
ENSG00000198799.11	LRIG2	1.80123	1.32683	0	0.673104	0.759961	0.870486	0.962188	1.93423	2.27248	0.547384	1.04177	2.75335	1.32336	0.560127	2.55068	3.03532	3.74986	2.34146	3.76447	0.228857	1.51761	0.715558	0.642334	0.292128	0.692705	0.864969	0.891116	2.31319	2.07122	0.250246	0.279556	0.682772	1.37617	1.35135	0.257402	0.681498	0.534836	0.351782	5.55012	0.728946	0.443369	1.66203	0	0.897968	4.44121	1.11353	0.859026	0
ENSG00000157193.15	LRP8	0.263777	0.687692	0	0.673104	0.311608	0.474508	0.320729	0.506379	0.281873	0	0.652051	1.67821	0.620102	1.29189	1.19168	0.664375	0.627556	2.70669	1.26902	0.228857	0.469438	0	0	0	0	0	0.595107	0.3276	3.35859	0	0	0.505871	0.682569	0.450448	0	0.432068	0	0.902107	0	0	0	0	0	0	0	0	0.329864	0.637803
ENSG00000122477.12	LRRC39	0	0	0	0	0	0	0	0	0	0	0	0	0	0	0	0	0	0	0.291262	0	0	0	0	0	0	0	0	0	0	0	0	0	0.269653	0	0	0	0	0	0	0	0	0	0	0	0	0	0	0
ENSG00000066557.5	LRRC40	0.769248	0	0	0	0.625364	0.256886	0.216125	0	0	0	0.538562	0.559888	0	0	0	0	0	0.292181	0.291262	0	0	0.246697	0	0	0.583509	0	1.19227	0	0	0.500492	0	0.298654	0.225925	0	0.257402	0.355187	2.0492	1.53016	1.06334	0.364473	0.28164	0.192316	0	0.384392	1.48754	0.695844	0.276051	0
ENSG00000132128.16	LRRC41	0.812365	0	0	0	0	0.217621	0.320729	0	0	0	0	0.24094	0	0	0.241586	0	0.273746	0	0.291262	0.228857	1.43785	0.187335	0.276394	0	0	0	0.297039	0	0	0	0	1.28008	0	0	0.239396	0.227166	0	0	0	0	0	0	0.502331	0	0	0	0	0.310998
ENSG00000116212.14	LRRC42	0	0	0.494341	0	0	0	0	0	0	0	0	0	0	0	0	0	0	0.422015	0.457664	0	0	0	0	0	0	0	0	0	0	0	0	0	0	0	0	0	0	0	0	0	0.290425	0	0	0	0	0	0	0
ENSG00000130764.9	LRRC47	0	0	0	0	0.224177	0.606096	0	0.828636	0	0	0.503213	0	0	0	0	0	0	0	0	0	0.496763	1.47254	0	0	0	0	0	0	0.297656	0	0	0	0.808958	0.188509	0	0.227166	0	0.338014	1.06334	0	0	0	0	0	0.807103	0	0	0.292993
ENSG00000033122.18	LRRC7	0	0	0	0.673104	0.401187	0	0	0	0	0	0	0	0	0	0	0	0	0	0	0	0	0	0	0	0	0	0.298068	0	0	0	0	0	0	0	0	0	0	0	0	0	0	0	0	0	0	0	0	0
ENSG00000197147.13	LRRC8B	0	0	0	0	0	0.606096	0.962188	0.276959	0	0	0	0	0	0.746836	0.558285	0	0	0	0	0.758308	0	0	0.331496	0	0.692705	0	0.496832	0	0.297656	0.688534	0	0.429836	0	1.02128	0.239396	0	0.534836	0	0	0	0.28164	0.268967	0	0.734799	0.825085	0	0.329864	0
ENSG00000181817.5	LSM10	0	0	0	0	0.311608	0	0	0	0	0	0	0	0	0	0	0	0	0	0	0	0	0	0	0	0	0	0	0	0	0	0	0	0	0	0	0	0	0	0	0	0	0	0	0	0	0	0	0
ENSG00000169641.13	LUZP1	0	0	0	1.20929	0	0.435243	0	0.22942	0	0	0	0	0.620102	0	0	0.635017	0	0	0	0.228857	0.786132	0	0	0	0	0	0.298068	0	0.595312	0	0	0	0	0.638958	0	0.227166	0	0	0.359576	0	0	0	0.285371	0	0.412543	0	0	0
ENSG00000011009.10	LYPLA2	0	0	0	0	0	0	0	0	0	0	0	0	0	0	0	0	0	0	0	0	0	0	0	0	0	0	0.297039	0	0	0	0	0	0	0	0	0	0	0	0	0	0	0	0	0	0	0	0	0
ENSG00000143353.11	LYPLAL1	0	0	0	0	0	0	0	0	0	0	0	0	0	0	0	0	0	0	0	0	0	0	0	0	0	0	0	0	0	0	0	0	0	0	0	0	0	0	0	0	0	0	0	0	0.269605	0	0	0
ENSG00000163155.11	LYSMD1	0	0	0	0	0	0	0	0	0	0	0	0	0	0	0	0.885331	0	0	2.24135	0	0	0.434032	0.276394	0	0	0	0	0	0.352232	0	0.279556	0	0	0	0.239396	0.216034	0	0	0	0	0	0.192316	0	0	0.535787	0	0	0.292993
ENSG00000143669.13	LYST	2.02084	0.306634	0.406021	5.64718	5.31712	0.862982	1.76192	1.1056	3.6374	1.2103	0.503213	1.84115	3.25542	0.54284	2.23398	2.12601	1.59912	2.96235	9.79118	3.99334	1.89744	3.22765	2.17587	0.584256	0	3.34994	1.78856	0.620049	3.62645	10.7576	0.827238	0.804525	5.2144	1.31475	0.509506	0.809519	1.92739	1.23879	7.6768	3.98848	1.28829	1.89335	1.68997	2.52082	2.97679	3.2139	3.42118	3.1394
ENSG00000162441.11	LZIC	10.1504	8.31297	0.812043	3.69632	5.08175	8.32738	3.10649	4.36803	4.9417	3.6309	3.23137	3.88295	4.62295	8.35944	8.05925	6.03039	9.65928	20.2249	11.2611	4.7361	9.6481	12.5252	2.59088	4.41097	1.27621	3.63657	11.0218	4.27478	14.8085	3.98991	4.42717	1.7462	6.65012	11.6693	2.06874	8.24791	13.2926	4.88497	11.4035	1.82236	4.28399	7.08799	3.65329	15.9946	10.0105	11.132	7.68501	6.9549
ENSG00000173212.4	MAB21L3	0	0	0	0	0	0	0	0	0	0	0	0	0	0	0	0	0	0	0	0	0	0	0	0	0	0.468839	0	0	0	0	0	0	0	0	0	0	0	0	0	0	0	0	0	0	0	0	0	0
ENSG00000127603.25	MACF1	4.79795	3.68519	1.88033	1.95085	7.62822	2.79906	4.6592	3.81713	3.04267	6.31952	5.1629	4.75743	3.02542	2.88029	1.35984	4.45132	5.43471	2.59712	1.89037	0.552102	4.24599	0	2.28004	9.00355	4.63054	4.28211	0.596137	1.03394	3.19486	6.25176	2.7727	1.54244	3.94151	2.174	2.70009	3.68789	4.88276	3.10963	12.1144	6.20745	2.15956	4.55946	1.89505	18.1409	8.65392	3.20788	3.51286	7.79777
ENSG00000116670.14	MAD2L2	0	0	0	0	0	0	0.255961	0	0	0	0	0	0	0	0	0	0	0	0	0	0	0	0	0	0	0	0	0	0	0	0	0	0	0	0	0	0.292743	0	0	0	0	0	0	0	0	0	0	0
ENSG00000081026.18	MAGI3	0	0.957114	0	1.20929	2.45475	0.988281	3.4054	1.15012	1.6616	0	0.573911	1.6434	4.32597	6.18919	4.63611	1.19974	3.65172	8.61513	8.46787	1.44488	2.21413	1.95009	0.642334	1.6713	0.583509	1.5473	5.45866	6.84527	2.84263	4.77102	1.44929	2.59991	0.495578	4.05934	2.54012	3.58561	1.095	3.60088	2.81506	1.51835	1.14413	3.26582	1.29003	5.57504	1.60907	21.7506	0	0.655807
ENSG00000162385.10	MAGOH	0	0	0	0	0	0.388474	0	0	0.281873	0.547384	0	0	0	0.168313	0	0.908487	0.35381	0	0	0	0.234719	0	0	0	0	0	0	0	0	0.980249	0	0	0	0	0.478793	0	0	0	0	0	0	0.278177	0	0.513576	0	0	0	0
ENSG00000198162.12	MAN1A2	83.1974	186.793	64.6	142.834	145.927	206.71	77.4867	58.2493	144.362	96.4462	109.741	83.5734	126.525	158.75	199.307	77.886	270.41	215.114	405.789	110.873	309.582	151.806	147.887	121.513	95.1359	118.129	214.397	116.308	152.921	157.93	38.0431	251.421	44.1196	188.449	75.9832	224.564	130.203	355.138	299.179	92.8736	90.4385	192.211	62.1672	56.3854	280.286	348.101	47.6703	323.719
ENSG00000117643.14	MAN1C1	0	0	0	0	0	0	0	0	0	0	0	0	0	0	0	0	0	0	0	0	0	0	0.331496	0	0	0	0	0	0	0.250246	0	0	0	0	0	0	0	0	0	0	0	0	0	0	0	0	0	0
ENSG00000142733.14	MAP3K6	0	0	0	0	0	0	0	0	0	0	0	0	0	0.186709	0	0	0	0	0	0	0.234719	0	0	0	0	0	0	0	0	0	0	0	0	0	0	0	0.292743	0	0.344189	0	0	0	0	0	0	0	0	0
ENSG00000116871.15	MAP7D1	0.534565	0	0	0.604644	0.759961	0.256886	0.320729	0	0.267055	0.629299	0	0.481881	0.345927	1.08513	0	0	0.881688	1.42839	0.915328	0.505539	1.20092	0	0	0	0	0.901323	2.28437	0.26688	0	0.510128	0	0.597308	0	0	0	0	0.560161	1.56437	1.76711	0	0	1.02685	0	0.863982	0.808815	1.13158	0.276051	0.310998
ENSG00000162889.10	MAPKAPK2	0	0	0	0	0	0.256886	0	0	0.281873	0	0	0	0	0	0	0	0	0	0	0	0	0	0	0	0	0	0	0	0	0	0	0	0	0	0	0	0	0	0	0	0	0	0	0	0	0	0	0
ENSG00000186205.12	MARC1	0	0	0	0	0	0.652864	0	0	0.267055	0	0	0	0	0	0	0.302829	0	0	0.452239	0	0	2.06117	0	0	0	0	0	0	0.561837	0.280616	0	0	0	0.638958	0	0	0	0	0	0	0	0	0	0	0	0.367168	0	0
ENSG00000117791.15	MARC2	0	0	0	0	0	0	0	0	0	0	0	0	0.345927	0	0	0	0	0	0	0	0	0.246697	0	0	0	0	0	0	0	0	0	0	0	0.188509	0	0	1.03279	0	0.344189	0	0	0	0.285371	0	0	0.189599	0	0
ENSG00000116141.15	MARK1	0.966777	0	0	0	0	0	0	0	0.815984	0	0.286956	0	1.03778	1.00988	3.66725	0.885331	1.59912	3.2788	0	0	0.262044	0.663838	0.276394	0	0	0	0	2.76223	0	0.760374	0	0.597308	0	1.05281	0.496798	0	0.585486	0	0	0	0	0.537934	0	0	0.807103	0.892258	0	0
ENSG00000009724.16	MASP2	0	0	0	0	0	0	0	0	0	0	0	0	0	0	0	0	0	0	0	0	0	0	0	0	0	0	0	0	0	0	0	0	0	0	0	0	0	0	0	0	0	0	0	0	0	0	0	0
ENSG00000086015.20	MAST2	1.05511	0	0	0	0.896708	0.435243	0.216125	0	0.267055	0	0.251606	0.24094	0.285577	0.374527	0	0.664375	0	0.292181	0.681071	0.276051	2.39641	0.170444	0	0	0	0.468839	1.19227	0.857352	0.704464	0.250246	0	0.429836	0.269653	0	0.779616	0.227166	0.267418	0.50502	1.37675	0	0	0.461283	0	0	0.537499	0.367168	0.989591	1.29361
ENSG00000143384.12	MCL1	0	0	0	0	0	0	0	0	0	0	0	0	0	0	0	0	0	0	0	0	0	0	0	0	0	0	0	0	0	0	0	0	0	0	0	0	0	0	0	0	0	0	0	0	0	0	0.276051	0
ENSG00000153898.12	MCOLN2	0.263777	0	0	0	1.20832	0	0	0	0	0	0	0.318948	0.285577	0	0	0	0	0.292181	0.457664	0	0	0	0	0	0	0	0.496832	0	0.561837	0.530862	0	0	0	0	0	0	0.447303	0	0	0	0	0	0	0	0	0	0	0
ENSG00000055732.12	MCOLN3	0.483388	0	0	0	0	0	0	0	0	0	0	0	0	0	0	0	0	0	0.909903	0	0.262044	0.170444	0	0	0	0	0	0	0.297656	0	0	0	0	0	0	0	0	0.676028	0.344189	0	0	0	0	0	0	0	0	0
ENSG00000198625.12	MDM4	0	0.306634	0	0	0.311608	0	0	0	0	0	0	0.679634	0.285577	0.504939	0.241586	0	0	1.24178	0	0	0	0.187335	0.310838	0	0.583509	0	0.298068	0	0.352232	0	0	0.298654	0.952222	1.3097	0.478793	0	0	0	0.703765	0	0	0	0	0	0.269605	0.556767	0.276051	0
ENSG00000163875.15	MEAF6	0	0	0	0	0	0.256886	0	0	0	0	0.400444	0	0	0	0	0	0	0.620888	0	0	0	0	0	0.399049	0	0	0	0	0	0	0	0.252936	0	0	0	0	0	0	0	0	0	0	0	0	0	0	0.329864	0
ENSG00000116353.15	MECR	0	0	0	0	0.712794	0.217621	0.216125	0	0.281873	0	0.573911	0.438693	0	0.523335	1.11741	1.24067	0.801624	0	0	0	0	0.246697	0.552789	1.00834	0.583509	0	0.496832	0	0	1.12247	0	0.597308	0.269653	0	0.239396	0.582353	0	0	0.344189	0.506118	0.733794	0.461283	0	0.350407	0.535787	1.74602	0	1.20798
ENSG00000159479.16	MED8	0	0	0	0	0	0	0	0	0	0	0	0	0	0	0	0	0	0	0	0	0	0	0	0.292128	0	0	0.298068	0	0	0	0	0	0	0	0	0	0	0.338014	0	0	0	0.278177	0	0	0	0	0	0
ENSG00000116604.17	MEF2D	0.270788	0	0	0	0	0.388474	0	0	0	0	0	0	0.620102	0	0	0	0	0	0	0	0.479282	0.493394	0.310838	0	0	0	0	0	0	0	0	0	0	0.377018	0	0	0	0.183442	0	0	0	0.547144	0	0.350407	1.48583	0	0.329864	0
ENSG00000162591.15	MEGF6	0	0	0	0	0	0.217621	0	0	0.594723	0	0	0.438693	0	0	0	0	0	0	0	0	0	0	0	0	0	0	0	0	0.352232	0	0	0	0	0	0	0	0	0	0	0	0	0	0	0	0.267894	0	0	0
ENSG00000010165.19	METTL13	0.263777	0	0	0	0	0.770659	0	0	0	0	0	0	0	0	0.241586	0.291251	0.273746	0	0.228832	0	0	0	0	0	0	0	0	0	0.352232	0	0	0	0	0.340425	0	0.582353	0	0.689796	0	0	0	0.278177	0	0.350407	0	0.531106	0	0
ENSG00000116688.16	MFN2	1.47926	0	0.812043	2.5555	5.08175	1.81078	1.59255	1.97875	2.96724	2.25677	3.20674	1.2047	4.73225	1.10297	1.52547	1.82938	5.30974	1.59074	4.20962	2.10691	1.22825	5.38961	2.45913	2.70786	0	0.864969	0.993664	1.59727	3.20727	0.250246	1.11822	0.429836	2.87872	3.80751	0.478793	2.8161	1.42944	1.25522	1.04795	1.37671	2.18592	2.14173	0	5.47309	2.9571	9.83537	3.07588	0
ENSG00000168389.17	MFSD2A	0.812365	0	0	0	0	0.217621	0	0.828636	0.594723	0	0	0.24094	0	0.186709	0.241586	0	0	0	0	0.276051	0	0	0.60789	0	0	0	1.18815	0.800641	0.352232	0	0	0	0	1.1313	0	0	0	1.22502	0	0.364473	0	0.192316	0	0.384392	0.53921	1.37886	0	0
ENSG00000143198.12	MGST3	0	0	0	0	0	0	0	0	0	0	0	0	0	0.374527	0	0	0	0	0	0	0	0	0	0	0	0	0	0	0	0	0	0	0	0	0	0	0	0	0	0	0	0	0	0	0	0	0	0
ENSG00000154305.16	MIA3	0	0.687692	0	0.673104	0.535785	1.64743	0	0.22942	0.281873	0	0	0	0.345927	0.187263	0.316699	0.332188	0.273746	0.620888	0.291262	0.228857	0.234719	0.170444	0.552789	0.399049	0	0	0	0.533761	0.297656	0.229511	0	0	0	0	0.527512	0	0	1.18105	1.03257	1.01224	0.443369	1.19153	0.4682	0.350407	0	0.51226	0	0
ENSG00000198160.14	MIER1	3.94054	8.29586	4.50205	3.62786	6.91328	1.54761	0.432249	0.91768	7.16839	2.25677	0.974356	8.51372	2.36114	2.50577	3.33346	1.78224	2.16055	8.05503	10.8685	4.12907	11.8729	1.50737	4.31034	13.8286	2.07811	1.76629	4.76307	1.21052	2.45692	2.96965	1.94546	2.73109	3.74828	4.17947	5.82174	1.35186	3.54085	5.12482	4.77164	0.364473	0.853705	6.7402	2.15817	6.2727	2.14486	2.71447	1.70262	5.91378
ENSG00000180488.15	MIGA1	5.65448	0.713557	3.19567	5.7841	4.27937	5.52832	2.33861	3.35752	4.39277	3.9136	8.89004	4.52084	2.73984	4.29816	3.59213	5.14355	6.17434	3.57098	13.5749	1.7203	4.56353	0.493394	2.00365	10.6971	3.71945	2.30784	7.24826	0.59448	3.85715	2.80235	0.547682	2.34351	3.36327	3.23693	1.0116	5.34275	3.07304	5.50727	15.2151	0.728946	0.572065	8.17307	3.68757	4.51391	6.21805	8.67812	4.27228	4.39919
ENSG00000116691.10	MIIP	0	0	0	0	0	0	0	0	0	0	0	0	0	0	0	0	0	0	0	0	0	0	0	0	0	0	0	0	0	0	0	0	0	0	0	0	0	0	0	0	0	0	0	0	0	0	0	0
ENSG00000173436.13	MINOS1	0	0	0	0	0	0	0	0	0	0	0	0	0	0	0	0	0	0	0	0	0	0	0	0	0	0	0	0	0	0	0	0	0	0	0	0	0	0	0	0	0	0	0	0	0	0	0	0
ENSG00000270136.6	MINOS1-NBL1	0	0	0	0	0	0	0	0	0	0	0	0	0	0	0	0	0	0	0	0	0	0	0	0	0	0	0	0	0	0	0	0	0	0	0	0	0	0	0	0.364473	0	0	0	0	0	0	0	0
ENSG00000225206.9	MIR137HG	0	0	0	0.604644	0	0.770659	0	0	0	0	0	0	0	0	0	0	0	0	0	0	0	0	0	0	0	0	0	0	0	0	0	0	0	0	0	0.227166	0	0	0	0	0	0	0	0	0	0	0	0
ENSG00000079277.19	MKNK1	0.241694	0	0	0	0	0	0.216125	0	0.281873	0	1.39943	0	0.285577	1.43959	0	0	0.273746	1.0429	2.23593	0.228857	0	0.187335	0	0.399049	0.583509	0	0	0	0	0.229511	0	0	0	0	0.239396	0.787255	0	0.704898	0.344189	0	0	0.845915	0	0.768784	0	0.550752	0.276051	0.585987
ENSG00000132763.14	MMACHC	0	0	0	0	0	0	0	0	0	0	0	0	0	0	0	0	0	0	0	0	0	0	0	0	0	0	0	0	0.352232	0	0	0	0	0	0	0	0	0	0	0	0	0	0	0	0	0	0	0
ENSG00000116151.13	MORN1	0	0	0	0	0	0	0	0	0	0	0	0	0	0	0	0	0.881688	0	0.22612	0	0	0	0	0	0	0	0	0	0	0	0	0	0	0.261939	0	0	0	0.16834	0	0.364473	0	0	0	1.05122	0	0	0	0
ENSG00000155363.18	MOV10	0	0	0	0	0	0	0	0.276959	0	0	0	0	0	0	0	0	0	0	0	0	0.234719	0	0	0	0	0	0	0	0.297656	0	0	0	0	0	0	0	0	0	0	0	0	0	0	0	0	0	0	0
ENSG00000197965.11	MPZL1	1.53044	3.08327	1.72136	0.604644	1.7372	2.39384	1.84159	2.5319	2.21187	5.35496	0.800889	0.481881	0.285577	2.71198	1.84133	2.38252	3.15172	1.46492	3.66592	0.252769	5.93604	0.698667	4.78049	0.584256	1.85972	0.937678	2.97878	1.96002	5.84902	1.54148	1.11822	3.90087	1.37617	2.07385	0.257402	3.68128	2.12779	2.11202	15.4745	0.364473	2.88457	4.10252	2.98	0.768784	2.43587	3.68733	2.6847	1.93141
ENSG00000233217.2	MROH3P	0	0	0	0	4.29057	0	0	0	0.267055	0	0	0.318948	0	0	0	0	0	0	4.537	0	0	0.417141	1.16068	0	0	0	0	0.655199	0	0	0	0	0	0	0	0.216034	0	0.366884	0	0	0.28164	0	0	0.768784	0	2.21504	0	0
ENSG00000184313.19	MROH7	0	0	0	0	0	0	0	0	0	0	0	0	0	0	0	0	0	0	0	0	0	0	0	0	0	0	0	0	0	0	0	0	0.269653	0.188509	0	0	0	0	0	0	0	0	0	0	0	0	0	0
ENSG00000271723.5	MROH7-TTC4	0.241694	0	0	0	0	0.256886	0	0	0	0	0	0.920574	0	0.373972	0.241586	0	0	0.292181	0.22612	0	0	0	0	0	0	0	0.596137	0	0	0	0.279556	0	0	0.377018	0	0.355187	0	0.16834	0.359576	0.364473	0	0.384632	0	1.89113	0.267894	0	0	0.310998
ENSG00000117501.14	MROH9	0	0	0	0	0	0	0	0	0	0	0	0	0	0	0	0	0.791817	0	0	0	0	0	0	0	0	0	0	0	0	0	0.279556	0	0	0	0	0	0	0	45.4401	0	0	0	0	0	0	0	0	0
ENSG00000143314.12	MRPL24	0	0	0	0	0	0	0	0	0	0	0	0	0	0	0	0	0	0	0	0	0	0	0	0	0	0	0	0	0	0	0	0	0	0	0	0	0	0	0	0	0	0.278177	0	0	0	0	0	0
ENSG00000116221.15	MRPL37	0	0	0	0	0.401187	0.770659	0	0	0	0	0.251606	0	0	0.374527	0.559125	0	0.263939	0	1.10262	0	0.524088	0.340888	0	0.716212	0.583509	0	0	0	0.649888	0.229511	0	0	0	0.602365	0.239396	0	0.894606	0.366884	0	0	0.290425	0.278177	0	0.350407	0.825085	0.758398	0	0
ENSG00000143436.10	MRPL9	0	0	0	0	0	0	0	0	0	0	0	0.438693	0	0	0	0	0	0	0	0	0	0	0	0	0	0	0	0	0	0	0	0	0	0	0	0	0	0	0	0	0	0	0	0	0	0	0	0
ENSG00000053372.4	MRTO4	0	0	0	0	0	0	0	0	0	0	0	0	0	0	0	0	0	0	0	0	0	0	0	0	0	0	0	0	0	0	0	0	0	0	0	0	0	0.183442	0	0	0	0	0	0	0	0	0	0
ENSG00000057468.6	MSH4	0	0	0	0	0.311608	0	0	0.22942	0	0	0	0	0.620102	0	0	0	0	0	0	0	0	0	0.662992	0	0	0	0	0	0	0	0	0	0	0	0	0	0.447303	0	0	0	0	0	0.4682	0.513576	0.269605	0	0	0
ENSG00000125459.14	MSTO1	0.241694	0.306634	0	0	0	0	0	0	0	0	0	0	0	0	0	0	0	0	0	0	0	0	0	0	0	0	0	0	0	0	0	0	0	0	0	0	0	0	0	0	0	0	0	0	0	0	0	0
ENSG00000188786.9	MTF1	0.263777	1.03154	0	0.604644	0	0.776948	0	0	0.267055	0	0	0	0.571154	0	0.316699	0.635017	0	0	0.517381	0	0	0	0.60789	0	0	0	0	0	0	0	0	0.429836	0.451851	0	0	0	0	0.688462	0	0	0.28164	0.470492	0	1.54073	1.48754	1.08106	0	0.34481
ENSG00000143033.17	MTF2	0.241694	0	0	0	0.224177	1.89803	0	0.276959	2.16608	0.581	1.39943	1.19778	0.631504	0.187263	0.950096	0.582502	0.617749	0	0.904479	0	0.234719	0.374669	0	0.424084	0	0	0	1.42626	1.19062	1.84283	2.49314	0.252936	0.836863	0	0	1.87508	0.534836	0.674694	1.73633	0	0	0.278177	1.64381	0.513576	1.33947	2.2391	0.621351	0.34481
ENSG00000117640.17	MTFR1L	0	0.343846	0	0	0	0	0	0	0	0	0	0	0	0	0	0.291251	0	0	0	0	0	0	0	0	0	0	0	0	0	0.561233	0	0	0	0.261939	0	0	0	0	0	0	0	0	0	0	0	0	0	0
ENSG00000177000.11	MTHFR	0.263777	0	0	0	0	0	0	0	0	0	0	0	0	0	0	0	0	1.53396	0	0	0	0	0	0	0	0.322986	0	0.176584	0	0	0	0.429836	0	0	0	0.216034	0.447303	0	0	0	0	0.192316	0	0	0.267894	0	0	0
ENSG00000014914.20	MTMR11	0	0	0	0	0	0	0	0	0	0	0	0.318948	0	0	0.241586	0	0	0	0	0	0	0	0	0	0	0	0	0	0	0	0	0	0	0	0	0	0.267418	0	0.359576	0	0	0	0	0	0	0	0	0
ENSG00000198793.12	MTOR	2.04397	1.80817	1.95074	0	1.24858	0.652864	1.18523	0.830878	1.14365	0.581	4.90057	0.559888	2.69566	1.47694	0.483172	1.19974	1.16524	1.16873	0.969621	0.481627	1.23809	1.60156	0.863627	1.11526	0.583509	0.645973	1.58774	1.03794	0.649888	1.20976	0.827238	0	1.55837	1.80685	0.496798	2.23027	0.447303	1.02781	2.4401	0	0.56328	0.845915	0.4682	1.89113	3.49288	1.60013	1.13508	1.63842
ENSG00000116984.12	MTR	5.11782	4.87432	3.84002	0.673104	7.36593	3.09643	6.2947	4.51143	5.0481	1.17668	6.22514	3.36625	7.27964	5.74386	4.78466	6.43136	4.65529	9.26429	5.86845	2.59691	4.73512	10.2009	5.02156	6.15738	0.583509	1.29745	7.04728	4.15334	9.13193	4.99525	2.22502	2.29779	5.29083	6.03833	2.27742	4.39061	4.06413	2.91109	9.09972	3.92802	3.43907	3.27503	5.45767	6.55829	5.14306	11.9702	2.74602	5.24206
ENSG00000173171.14	MTX1	0	0	0	0	0	0.256886	0	0	0	0	0.400444	0	0	0	0	0	0	0	0	0	0	0	0	0	0	0	0	0	0	0	0	0	0	0	0	0	0	0	0	0	0	0	0	0	0	0	0	0
ENSG00000185499.16	MUC1	0	0	0	0	0	0	0	0	0	0	0	0	0	0	0	0	0	0	0	0	0	0	0	0	0	0	0	0	0	0	0	0	0	0	0	0	0	0	0	0	0	0	0	0	0	0	0	0
ENSG00000132781.17	MUTYH	0	0.306634	0	0	0	0	0	0.22942	0	0	0	0	0	0	0	0	0.791817	0	0	0	0	0.170444	0	0.424084	0	0	1.48519	0	0	0	0	0	0	0.638958	0.54022	0.227166	0	0.917209	0	0	0.290425	0.192316	0	0	0	0.183584	0	0
ENSG00000162576.16	MXRA8	0	0	0	0	0	0	0	0	0	0	0	0	0	0	0	0	0	0	0	0	0	0	0	0	0	0	0	0	0	0	0	0	0	0	0	0	0	0	0	0.506118	0	0	0	0	0	0	0	0
ENSG00000142661.18	MYOM3	0	0	0	0	0	0.217621	0	0	0	0	0	0	0	0.746836	0	0	0	0	0	0	0	0	0	0	0	0	0	0	0	0	0	0.298654	0	0	0	0	0	0.183442	0	0	0	0	0	0	0	0	0	0
ENSG00000162601.9	MYSM1	1.55252	1.63346	0	0.673104	1.91896	2.37254	1.08062	1.10784	1.41071	1.67577	2.45937	2.04035	3.34854	4.24187	1.11741	1.56128	1.33931	1.33508	2.59504	2.54134	1.26541	0.587585	1.54728	1.85651	0.692705	1.26066	1.98511	1.03794	1.48828	1.32161	0.559112	1.3104	1.17335	0.261939	1.33784	3.11006	1.88569	1.05535	1.42292	1.88283	1.70741	0.769264	1.8728	1.76195	1.75886	1.27146	0.828154	0.914989
ENSG00000008130.15	NADK	0.541577	0	0	0	0	0.217621	0	0.414318	0	0.547384	0	0	0	0.168313	0	0	0	0	0.681071	0.457715	0	0	0	0	0	0	0	0.3276	0	0	0	0	0	0.523879	0	0	0	0	0	0.364473	0	0	0	1.72796	0	0	0.291488	0
ENSG00000132780.16	NASP	1.25264	1.32683	0.979966	0	4.19839	1.92979	0.648374	0.414318	1.66294	0	0.538562	1.67821	0	0.355022	0.559125	0	0.881688	1.33508	1.20117	1.03436	0.966201	1.29445	0	0	0	0.901323	1.2907	1.33597	2.4904	1.69915	0.547682	0.252936	0.539305	1.81215	1.19698	0.432068	1.90207	1.04024	0.359576	0.87059	0.56328	2.02606	0	2.05114	2.9571	0.549952	0.881966	0
ENSG00000134369.15	NAV1	1.07614	0	1.31534	0.604644	0	0.652864	0	0.414318	0.801166	2.33868	0	0	0.977431	0	0	2.17315	0	0	0.457664	0.457715	0	0	0	0	0	0	1.5898	0	1.89509	0.500492	0.559112	0	0	0.188509	0.239396	0	0	0	2.06513	0	0	0.278177	0	0.768784	0.267894	0	0.951215	0.966805
ENSG00000163382.11	NAXE	0	0	0	0	0	0	0	0	0	0	0	0	0	0	0	0	0	0	0	0	0	0	0	0	0	0	0	0	0	0	0	0	0	0	0	0	0	0	0	0	0	0	0	0	0	0	0	0
ENSG00000158747.14	NBL1	0	0	0	0	0	0	0	0	0	0	0	0	0	0	0	0	0	0	0	0	0	0	0	0	0	0	0	0	0	0	0	0	0	0.340425	0	0	0	0	0	0	0	0	0	0	0	0	0	0
ENSG00000219481.10	NBPF1	1.56759	2.01452	0.900362	1.27775	0.759961	0.474508	0.792815	0.643738	1.42552	1.743	0.903657	1.51673	1.88311	0.542285	0.800711	2.59878	0.263939	0	0.520094	0.457715	0.524088	2.15327	0.552789	1.11526	0	1.87028	3.37836	0.176584	0.352232	0.530862	2.47028	0.859673	1.17815	0.942546	1.52111	1.68479	0.292743	1.56303	1.97503	0	0.572065	1.04744	1.5754	0.513576	0.94833	1.44221	0.291488	0
ENSG00000271425.7	NBPF10	0	0	0.406021	0	0	0	0	0	0	0	0	0	0.285577	0	0	0	0	0	0	0	0	0.246697	0	0	0	0	0	0	0	0	0	0	0	0	0	0	0	0	0.344189	0	0	0	0	0	0	0	0.659727	0
ENSG00000263956.6	NBPF11	0	0	0.326655	0	0	0	0	0	0.563747	0	0	0	0	0.168313	0	0.332188	1.34912	0.292181	0	0	0.234719	0.170444	0	0	0	0.432484	0.298068	0.3276	0	0	0.279556	0	0	0	0	0	0	0.183442	0	0	0	0.855124	0	0.350407	0.269605	0.683013	0	0
ENSG00000268043.7	NBPF12	0.263777	0	0	0	0.311608	0	0.432249	0.22942	0	0	0	0	0	0	0.79987	0	0.35381	0.913069	0.977758	0.252769	0.234719	0.528223	0	0	0	0.468839	0	0	0	0	0.559112	0	0	0	0.239396	0	0.292743	0.338014	0.688377	0.364473	0.443369	0.653599	0	0	0	0	0.291488	0
ENSG00000283342.1	NBPF13P	0	0	0	0	0	0	0	0	0	0	0	0	0	0	0	0	0	0	0	0	0	0	0	0	0	0	0	0	0	0	0	0	0	0	0	0.355187	0	0	0	0	0	0	0	0	0	0	0	0
ENSG00000270629.5	NBPF14	0	0.406923	0	0	0	0	0.320729	0	0	0	0	0	0	0	0.316699	0	0.263939	0	0	0	0	0	0	0.292128	0	0	0.594077	0	0.561837	0.250246	0	0	0.225925	0	0	0	0	0	0	0	0	0.192316	0	0	0	0.170753	0	0
ENSG00000266338.6	NBPF15	0	0	0	0	0	0	0	0	0	0	0	0	0	0	0.559125	0	0	0	0	0	0	0	0	0	0	0	0	0	0	0	0	0	0	0	0	0	0	0	0	0	0	0	0	0	0	0	0	0
ENSG00000271383.6	NBPF19	0	0	0	0	0	0	0.320729	0	0.267055	0	0	0	0	0	0	0	0	0	0	0	0	0.170444	0	0	0	0	0	0	0	0	0.279556	0	0.341285	0.188509	0	0	0	0.33668	0.719152	0	0	0.268967	0.4682	0	0	0	0	0
ENSG00000162825.16	NBPF20	0	0	0.326655	0	0	0	0	0	0	0	0	0	0	0	0	0	0	0	0	0	0	0	0	0	0	0	0	0	0	0	0	0	0	0	0	0	0	0	0	0	0	0	0	0	0	0	0	0
ENSG00000272150.5	NBPF25P	0	0	0	0	0	0	0	0	0	0	0	0	0	0	0	0	0	0	0	0	0	0.187335	0	0	0	0	0	0	0	0	0	0	0	0	0	0	0	0	0	0	0	0	0	0	0	0	0	0
ENSG00000273136.6	NBPF26	0.270788	0.306634	0.494341	0	0	0	0	0	0	0	0	0	0	0.168313	0	0	0.263939	0	0	0	0.234719	0	0	0	0.583509	0	0.298068	0	0.561837	0	0	0	0.269653	0	0.496798	0	0	0	0	0.506118	0	0	0	0	0.267894	0.183584	0	0
ENSG00000142794.18	NBPF3	0	0	0	0	0	0	0	0	0	0	0	0	0	0.374527	0	0	0	0	0	0	0	0	0	0	0	0	0	0	0	0	0	0	0.341285	0	0	0	0	0	0	0	0	0	0	0	0	0	0	0
ENSG00000196427.13	NBPF4	0	0	0	0	0	0	0	0	0	0	0	0	0	0	0	0	0	0	0	0	0	0	0	0.424084	0	0	0	0	0	0	0	0	0	0	0	0	0	0	0	0	0	0	0	0	0	0	0	0
ENSG00000186086.18	NBPF6	0	0	0	0	0	0	0	0	0	0	0	0	0	0	0	0	0	0	0.291262	0	0	0	0	0	0	0	0	0	0	0	0	0	0	0	0	0	0	0	0	0	0	0	0	0	0	0	0	0
ENSG00000270231.3	NBPF8P	0.270788	0	0	0	0	0	0	0	0	0	0	0.318948	0.620102	0	0	0	0	0	0	0	0.262044	0	0	0	0.583509	0	0	0	0.352232	0	0	0	0.269653	0	0	0.216034	0	0	0	0	0	0	0	0	0	0	0.659727	0.310998
ENSG00000269713.7	NBPF9	0	0.306634	0	0	0.224177	0.256886	0	0.22942	0.563747	0.629299	0	0.438693	0	0	0	0.59408	0	0	0.291262	0	0	0.170444	0.276394	0.292128	0.583509	0	0	0	0	0	0	0	0.269653	0	0	0.227166	0	0	0	0	0	0	0	0	0.537499	0.189599	0	0
ENSG00000020129.15	NCDN	0	0	0	0	0	0	0	0	0	0	0	0	0	0	0	0	0	0	0	0	0	0	0.331496	0.424084	0.583509	0	0	0	0	0.280616	0	0	0	0	0	0	0	0	0	0	0	0	0	0	0	0	0	0
ENSG00000116701.14	NCF2	0	0	0	0	0	0	0	0	0	0	0	0	0	0	0	0	0	0	0	0	0	0	0	0	0	0	0	0	0	0	0	0	0	0	0	0	0.267418	0	0	0	0	0	0.502331	0	0	0	0	0
ENSG00000184454.6	NCMAP	0	0	0	0	0.311608	0	0	0	0	0	0	0	0	0	0	0	0	0	0	0	0	0	0	0	0	0	0	0	0	0	0	0	0	0	0	0	0	0	0	0	0	0	0	0	0	0	0	0
ENSG00000162736.16	NCSTN	0	0.343846	0	0	0.401187	0.256886	0.320729	0	0	0.547384	0	0	0	0	0	0	0.547492	0	0.228832	0	0	0.187335	0	0.691177	0	0	0	0	0.352232	0	0.827238	0.429836	0	0	0.257402	0	0	0.338014	0.703765	0	0.28164	0	0	0	0.535787	0	0.329864	0.310998
ENSG00000058804.11	NDC1	3.06893	2.55336	2.36572	3.29706	6.61026	4.56551	0.511922	2.0678	4.53015	0	4.29131	3.51244	1.2402	3.64608	0.558285	3.4316	3.0283	1.49743	2.56331	3.14901	1.48265	0.545114	3.37786	1.91336	0	0	2.87829	0.59448	2.4904	1.71989	0.279556	1.4873	3.71559	3.68232	0.509506	4.05768	1.095	2.08182	3.03837	2.2473	2.44999	3.89179	0	4.29268	5.85174	2.50522	2.96826	3.74339
ENSG00000158864.12	NDUFS2	0	0	0	0	0	0	0	0	0	0	0	0.318948	0	0	0	0	0	0	0	0	0	0	0	0	0	0	0	0	0	0.229511	0.547682	0	0	0	0	0.216034	1.60933	0	0	0	0	0	0	0	0	0.683013	0	0
ENSG00000168653.10	NDUFS5	0	0	0	0	0	0	0	0	0	0	0	0	0	0	0	0	0	0	0	0	0	0	0	0	0	0	0	0	0	0	0	0	0	0	0	0	0	0.338014	0	0	0	0	0	0	0	0	0	0
ENSG00000157191.19	NECAP2	0.791331	0.406923	0	0	0	0.217621	0	0	0	0	0.251606	0	0	0	0	0	0	0	0	0	0	0	0	0	0	0.468839	0	0	0.352232	0	0	0	0	0.638958	0	0	0	0	1.76711	0	0	0	0	0	0.535787	1.13158	0	0.310998
ENSG00000143217.8	NECTIN4	0	0	0	0	0	0	0.255961	0	0	0	0	0	0	0	0	0	0	0	0.22612	0	0	0	0	0	0	0	0	0	0	0	0	0	0	0	0	0	0	0	0	0	0	0.278177	0	0.513576	0	0	0	0
ENSG00000172260.14	NEGR1	0	0	0.494341	0	0	0	0	0	0	0	0	0	0	0	0	0	0	0	0	0	0	0	0	0	0	0	0	0	0	0	0	0	0	0	0	0	1.41307	0	0	0	0	0	0	0	0	0	0	0
ENSG00000117650.12	NEK2	0	0.957114	0	0.604644	0	0	0	0	0	0	0.800889	0	0	0	0	0	0.70762	0	0.517381	0	0	0.187335	0	0	0	0	0	0.3276	0	0	0	0	0	0	0	0	0	0	0.359576	0.506118	0	0	0	0	0	0	0	0
ENSG00000151414.14	NEK7	4.86315	0.65048	4.4314	4.43789	12.7074	1.25896	0.511922	2.76209	1.61715	1.743	1.54499	1.6434	0.285577	1.5884	0	7.04322	0.811431	1.49743	5.10677	1.74484	6.88255	0.511333	1.65837	2.07353	0	0.322986	5.85295	4.30035	2.24732	0.959514	0	2.82252	1.70163	5.09097	0.54022	0.355187	1.16202	1.54793	7.69525	1.45789	0	0.999217	0.753571	2.90521	0.53921	2.37216	1.1042	1.86599
ENSG00000117691.9	NENF	0	0	0	0	0	0	0	0	0	0	0	0.24094	0	0	0	0	0	0	0	0	0	0	0	0	0	0	0	0	0	0	0	0	0	0	0	0	0	0	0	0	0	0	0	0	0	0	0	0
ENSG00000162614.18	NEXN	0	0	0	0.604644	0	0	0	0	1.11268	1.17668	0	0	0	0	0	0	0	0	0	0	0	0.170444	0	0	0	0	0	0	0	0	0	0	0	0	0	0	0	0	0	0.364473	0	0	0	2.17041	0	0	0	0
ENSG00000163531.15	NFASC	0.483388	0	0.494341	0	0	0	0	0	0	0	0	0	0	0	0	0	0	0	0	0	0	0	0	0	0	0	0	0	0	0	0	0	0	0	0	0	0	0	0	0	0	0	0	0	0	0	0	0
ENSG00000162599.15	NFIA	0	1.0574	0	0	0	0.692129	0.255961	0	0.281873	0	0	0.757641	0.691854	0.373418	0.241586	1.2291	0	0.422015	1.84341	0	0.524088	0.246697	0.642334	0	0	0	0.894205	0.771064	0.297656	2.31295	0	0	0.269653	0.188509	0	1.85282	0.714721	1.91215	0	0.506118	0	0	0.4682	0.513576	1.8821	0.373183	0	1.34543
ENSG00000066136.20	NFYC	0	0	0	0.673104	2.72348	1.15913	0.857584	0.276959	0.861778	0	0	0.481881	0.691854	1.40225	0	0.59408	0.263939	0.84403	0.452239	0	0.469438	0.170444	0.310838	1.6713	0	0	0.891116	0.3276	0.561837	0	0	0	0	0.680851	1.83994	0.227166	0	0.366884	2.40626	0.728946	0.572065	0.940985	0	0.350407	2.56254	1.63783	0.329864	0
ENSG00000116962.14	NID1	0.263777	0	0.653311	0	0.311608	0	0	0	0	1.09477	0	0	0	0.917367	0	1.21132	0	0	0	0.276051	0.524088	4.17197	0	0.292128	1.85972	0	0	0	1.35435	0.229511	0	0	0	0	0.514804	0	0	0	2.09591	0	0	0	0	1.21439	0	0	1.87156	0.689619
ENSG00000001461.16	NIPAL3	0	0	0	0	0	0.217621	0	0	0	0.581	0	0.438693	0.285577	0	0	0	0	0.292181	0.873785	0.276051	0.704157	0	0	0.424084	0	0	0.891116	0.655199	0.297656	0	0	0	0.539305	0.340425	0	0.4432	0.447303	0	0	0	0	0.384632	0	0.768784	0	0.170753	0	0
ENSG00000158793.13	NIT1	0.241694	0	0	0	0	0	0	0	0	0	0	0	0	0	0	0	0	0	0	0	0	0	0.276394	0	0	0	0	0.353169	0	0	0	0	0	0	0	0	1.14565	0	0.359576	0	0.290425	0	0.4682	0	0	0	0	0
ENSG00000162711.17	NLRP3	0.270788	0	0	1.20929	0	0	0	0	0	0	0	0	0	0	0	0	0	0	0	0	0	0	0	0.292128	0	0	0	0	0	0	0	0	0	0	0	0	0	0	1.04795	0	0	0	0	0	0	0	0.276051	0
ENSG00000143156.13	NME7	1.49433	0	0.653311	3.2286	1.95923	2.3003	0.752979	2.20817	2.50856	0	1.07712	0	0.285577	0	0.241586	0	0.527878	1.55823	0.228832	0.987166	1.66272	0.749339	0.662992	0.983305	0	0	3.87195	1.60285	0.561837	0.510128	1.66591	0.981426	2.21303	0	2.4967	0.670366	1.24956	0.33668	10.6127	1.37671	0	0	0.4682	3.39472	1.07329	2.0487	1.13508	2.37986
ENSG00000173614.13	NMNAT1	0.534565	0.343846	0	0	0.934823	0.217621	0	0	1.06822	0	1.65104	1.48046	0	1.98188	1.11825	0	0	3.96873	0.678359	0.758308	0.786132	2.80022	0.331496	0	0.692705	0	1.78326	0.882921	4.57399	0	0.279556	0.252936	0	2.29919	0.239396	1.363	0.267418	0.902107	1.72094	0	0	1.1539	0.502331	0.350407	1.09469	1.87795	1.48788	0.292993
ENSG00000157064.10	NMNAT2	0	0	0	0	0	0.256886	0.216125	0	0	0	0	0	0	0	0	0	0	0	0	0	0	0	0	0	0	0	0	0	0	0	0.279556	0	0	0	0	0	0	0	0	0	0	0.192316	0	0.513576	0	1.04337	0	0
ENSG00000188976.10	NOC2L	0	0.613268	0	0	0	0	0	0	0.53411	0.629299	1.3748	1.31753	0	0	1.11825	0.59408	0.547492	0	0.904479	0.987166	0.496763	0.732448	0.662992	0	0	0	0.596137	0.3276	0.649888	0.750738	0.279556	0.429836	0.451851	0.261939	0.54022	0.216034	0.585486	0.366884	0	0.728946	0.290425	3.09192	0	0.384392	0.53921	1.08867	1.20433	0.34481
ENSG00000162408.10	NOL9	0.270788	0.406923	0	1.27775	0.311608	1.16664	0.255961	0	0	0	0.939007	0.24094	1.66929	1.29023	0.483172	0.302829	1.32537	0.876544	1.39388	0.686572	0.704157	0.493394	0.310838	1.69633	0	0	1.19124	2.28762	0.947544	0.510128	0.547682	0.252936	0	0.86936	0.54022	0.648101	0	0	0.567498	0.87059	0.28164	0.73025	0.97053	2.17041	1.07329	1.43539	0.276051	0.585987
ENSG00000198929.12	NOS1AP	0	0	0	0	0.224177	0.256886	0	0.414318	0	0	0	0	0	0	0	0.91469	0	0	0.228832	0	0	0.187335	0	0	0	0.432484	0	0.353169	0	0	0	0.935708	0	0.790874	0.509506	0	0	0	0	0	0	0	0.502331	4.03747	0	0.367168	0	0
ENSG00000134250.19	NOTCH2	1.31083	0	0.326655	0	0	1.33749	0.320729	0	0.53411	0.581	0	0.559888	0	0	0	0.332188	0.547492	0	0.683784	0.504909	0.262044	0.663838	0.310838	0.292128	0.692705	0	0.79387	0.771064	0.297656	0	0	0	0.539305	0.188509	0.748903	0.355187	0	0.703563	0.359576	0	0	0.192316	0	0.863982	1.34118	0.550752	0.605915	0.603991
ENSG00000264343.5	NOTCH2NL	0	0	0	0	0	0	0.216125	0	0	0	0	0	0	0	0	0	0.263939	0	0	0	0	0.587585	0	0.292128	0	0	0	0	0.352232	0.250246	0	0	0	0.188509	0	0	0	0.183442	0	0	0	0	0	0	0.412543	0	0	0
ENSG00000131697.17	NPHP4	2.84126	2.86557	0.812043	1.95085	2.318	0.256886	1.07371	0.828636	2.7608	0.547384	2.99793	1.99716	0.285577	9.76446	1.04146	0.664375	6.97183	2.63364	1.42457	1.01045	2.68357	3.42263	0.97383	0	1.16702	0	5.45748	0.831783	7.68953	1.3978	1.39778	1.10318	0.269653	2.40921	2.30602	3.1024	1.03279	1.36449	6.61346	0	2.71406	5.27484	2.29469	1.08521	7.46082	2.32084	1.17345	3.03576
ENSG00000135838.13	NPL	0	0	0	0	0	0	0	0	0	0	0	0	0	0	0	0	0	0	0	0	0	0	0	0	0	0	0	0	0	0	0	0	0	0	0	0	0	0	0	0	0	0	0.502331	0	0	0	0	0
ENSG00000242349.5	NPPA-AS1	0	0.306634	0	0	0	0	0	0	0	0	0	0	0	0	0	0	0	0	0	0	0	0	0	0	0	0	0	0	0	0	0	0	0	0	0	0	0	0	0.359576	0	0	0	0	0	0	0	0.329864	0
ENSG00000169418.9	NPR1	0	0	0	0	0	0	0	0	0	0	0	0	0	0	0	0	0	0	0	0	0	0	0	0	0	0	0	0	0	0	0	0	0	0	0	0.355187	0	0	0	0	0	0	0	0	0	0	0	0
ENSG00000116833.13	NR5A2	8.77459	2.70221	0	0	0.847392	0	0	0	1.41071	0	0.573911	0	0	0	0	0	0	0	0	0	0	0	0	0	0	0	0	0	0	1.2305	0	0	0	0	0	1.82394	0	0	0.719152	0	0	0	0	0	2.74486	0	0	0
ENSG00000213281.4	NRAS	0	0	0	0	0	0	0	0	0	0	0	0	0	0	0.241586	0	0	0	0	0	0	0	0	0	0	0	0	0	0	0	0	0	0	0	0	0	0	0	0	0	0	0	0	0	0.267894	0	0	0
ENSG00000078618.21	NRDC	3.13518	3.37855	0.820996	2.48704	4.81731	1.85877	0.89742	0.735799	3.40132	2.27145	3.23137	2.44422	2.30079	1.81467	0.79987	4.29915	7.63609	4.48405	5.03349	0	2.99042	0.340888	2.2034	5.62955	0.583509	1.37016	7.34005	1.2401	6.56586	7.87907	0.279556	1.40183	4.22804	1.77026	3.01362	2.13912	4.47716	2.2817	3.86301	0.506118	2.58536	6.97233	2.40926	1.78602	3.80017	5.5227	2.31646	3.26103
ENSG00000117697.14	NSL1	0	0	0	0	0.224177	0.731394	0	0	0	0	0	0	0	0	0.241586	0	0	0	0	0	0.234719	0	0	0.584256	0	0	3.27875	0.3276	0	1.14756	0	0.298654	2.42687	0	0	0	2.9416	0	0	0	0.580849	0	0	0	0	0	0	0.585987
ENSG00000117481.10	NSUN4	0	0	0	0	0	0	0	0	0	0	0	0	0	0	0	0.302829	0	0.422015	0	0	0	0	0	0	0	0	0	0	0	0	0	0	0	0	0	0	0	0	0	0	0	0	0	0	0	0	0	0
ENSG00000162631.18	NTNG1	0.241694	0	0	1.27775	0	2.47115	0	0.276959	2.19705	0	0	0	0	0	0	0	0	0	0	0.481627	0	0	0	0	0	0	0	0	0	0.229511	0	0	0	0	3.56443	0	0	1.5617	0	0	0.28164	0	0	0	0	0	0	0
ENSG00000135778.11	NTPCR	0	0	0	0	0	0	0	0	0	0	0	0	0	0	0	0	0	0	0	0	0.479282	0	0.331496	0	0	0	0.594077	0	0	0	0	0	0	0	0	0	0	0	0	0	0	0.576948	0	0	0	0	0	0
ENSG00000163545.8	NUAK2	0	0	0	0	0	0	0	0	0	0	0	0	0	0	0	0	0	0	0	0	0	0	0	0	0	0	0	0	0	0	0	0	0	0	0	0	0	0	0	0	0	0	0	0	0.825085	0	0	0
ENSG00000069275.12	NUCKS1	0.725083	1.50154	0	0	2.67202	0.652864	0.864499	0.828636	0	0	0	1.68658	0.691854	0.56179	1.2668	0.908487	1.06556	0	0.686496	0.91543	0.786132	0.246697	3.06702	2.5795	0	0	0	2.06787	2.24732	0.500492	0.827238	0	1.17335	2.59772	0	1.42075	0	0.50502	0	0	0.886738	0.556353	3.19711	2.10244	0.267894	0.341506	0	0.603991
ENSG00000090273.13	NUDC	3.95456	1.42711	3.52232	10.1535	6.82585	6.55465	2.20108	2.48513	9.14284	4.67736	12.6493	3.28132	3.06296	4.99203	1.91644	4.14849	16.9906	3.9322	8.35848	1.28713	6.73201	9.3748	2.90083	4.48608	4.30296	3.02739	6.04847	2.19175	6.51128	7.83853	4.39288	1.18864	3.89405	9.28006	3.21489	6.86717	4.82798	7.73966	4.10171	4.1679	1.91096	5.12016	2.76304	9.6026	7.45226	14.7756	2.30853	0.914989
ENSG00000143228.12	NUF2	0	0	0.406021	0	0.311608	0	0	0	0	0	0	0	0	0	0.633398	0.664375	0	0	0.686496	0	0	0.170444	0	0.424084	0	0	0	0	0	0	0	0	0	0	0	0	0.267418	0.506354	0.567498	0.87059	0	0	0.502331	0.513576	0	0.701859	0.276051	0.637803
ENSG00000069248.11	NUP133	2.13125	4.16653	1.05933	1.20929	2.18555	0.692129	4.52275	4.00651	4.20114	2.88607	1.19061	4.47911	2.56356	1.43848	1.35816	4.34009	2.9441	4.13107	3.43438	0.504909	4.63346	1.54984	2.36959	2.25556	0.692705	0.468839	1.78532	0.800641	3.45904	3.90843	0.547682	1.23436	6.5127	1.88028	1.98719	3.92966	0.534836	1.40846	5.1936	0.728946	1.75801	3.36089	2.84333	5.70738	2.45727	8.05846	0.84359	0
ENSG00000143552.9	NUP210L	0	0	0	0	0.849541	0	0.216125	0	0.594723	0	0	0.24094	0.977431	0.523335	0	0.332188	0	0.422015	0.748926	0	0	0.340888	0	11.8934	0	1.33381	0	0.771064	0	0	0	0	0.341285	0	0.239396	0	1.27488	1.04024	0.344189	0	0	0	0	7.20105	0.825085	1.42938	1.15051	0
ENSG00000143748.17	NVL	0	0.306634	0	1.20929	2.41188	1.29072	0.752979	0.643738	0.548928	0	1.29338	0.438693	2.34974	1.57111	0.633398	1.82938	4.38722	2.11832	6.4111	0.804872	0.741326	1.2852	0.60789	1.72455	0.583509	0.432484	0.893175	1.71871	0	0.561233	2.22502	0.895961	3.42532	3.1635	0.754201	0.227166	0.714721	2.25283	1.83876	0.87059	0.56328	0.769264	0.856112	2.53073	3.93026	2.34048	0.567539	0
ENSG00000154358.20	OBSCN	2.79814	0.613268	0	0.673104	0.623215	2.93816	0	0.830878	1.67776	0.547384	0.286956	0	2.15728	1.85368	4.86145	2.13221	0	1.46492	0.517381	0.481627	1.21076	1.77096	2.86727	1.69952	1.27621	0.432484	2.38249	0.800641	0.649888	1.2705	1.37492	2.13032	1.94338	0	1.52111	2.15025	0	3.08343	2.64802	3.74296	2.44999	1.07587	0.4682	1.41154	1.21965	0.183584	0.582975	1.31161
ENSG00000122417.15	ODF2L	0.241694	0	0	0	1.33601	0.256886	0.216125	0.22942	2.49241	0	1.19061	0.24094	0	0.523889	0.558285	1.54971	0.35381	3.86316	0.912616	1.97244	0.234719	0.434032	0.310838	0.848167	0.692705	0.432484	1.19227	0.680768	0	0	1.09536	0	0.341285	0.523879	0	0	1.16202	0.183442	2.21373	0	0.733794	0.384632	0.97053	1.78602	0.537499	1.23376	1.1042	1.29361
ENSG00000162600.11	OMA1	6.59111	1.37538	1.22702	3.36552	17.8634	4.60477	1.2649	2.48436	6.52787	1.12838	4.7978	7.71144	0.966029	18.0582	3.01676	7.42172	3.83973	5.81913	7.21784	1.21602	7.0375	1.52426	1.69281	6.68478	1.75053	1.37016	8.93412	6.49768	2.84263	9.5946	2.82421	9.20155	4.40545	4.55143	2.78693	7.36603	4.50662	6.19794	7.31723	3.01402	2.71406	18.9251	0.753571	6.04472	4.02525	1.64986	4.03452	4.726
ENSG00000054277.13	OPN3	0	0	0	0	0	0	0	0	0	0	0	0	0	0	0.483172	0	0	0	0.22612	0	0	0.187335	0	0	0	0	0	0	0	0	0.547682	0	0	0.261939	0	0.355187	0	0	0.344189	0	0	0.384632	0	0	0	0	0	0.310998
ENSG00000085840.12	ORC1	0.754177	0.750769	0.900362	0	0.311608	0.388474	0.472086	0	0	0.629299	0	0.24094	0.345927	0.523889	0	0.332188	1.06556	0.292181	2.26662	0.986536	0	0.246697	0.310838	0.399049	0	0	0.496832	0.533761	0	0	0	0.429836	0	0.261939	0	1.31847	0	0	0.344189	0	0.443369	0.922566	0	1.50358	0.535787	1.37886	0	0.655807
ENSG00000117859.18	OSBPL9	0.270788	1.57038	0.820996	1.27775	3.38696	1.46908	0.792815	0	1.09786	1.75768	0.6874	1.67821	2.55216	2.15019	0.79987	3.11099	0.263939	4.29342	5.67302	2.38422	0.234719	2.0253	1.47152	4.32909	0.692705	1.58365	5.6564	1.38711	3.40447	2.02124	0.559112	1.3104	2.66009	4.02756	2.27531	2.87176	1.36242	0.50502	3.91928	1.51835	1.15291	2.58459	1.07307	3.23155	2.16969	2.96582	0.84359	0.621996
ENSG00000169914.5	OTUD3	0.270788	0	0	0.673104	0	0.256886	0.320729	0	0.267055	0.629299	2.33844	0	0	0	0.633398	0	0.617749	0.584363	0.969621	0.276051	0	0.927426	0	2.30881	0	0	1.88684	0.353169	0.352232	0.459022	0.279556	0	0.495578	1.23627	0.239396	0	1.12032	0.338014	0.359576	0	1.01543	0.556353	0	0.897968	1.75372	0.556767	0.605915	0
ENSG00000264522.5	OTUD7B	0.534565	0.919902	0	0	0.224177	0	1.67222	1.65727	1.36491	0.547384	0.503213	0.679634	3.14612	0.373418	0.558285	0.908487	7.73423	0.422015	6.33696	0.252769	0.731482	2.15432	1.58172	0.292128	0.583509	1.07846	0	1.60285	2.35647	1.24013	2.20216	1.11261	2.82397	0.261939	0	0.670366	0.292743	0.16834	1.61545	0.364473	0.28164	2.94645	0	2.97634	0.535787	1.42938	0.567539	0
ENSG00000117385.15	P3H1	0.241694	0.406923	0	0.673104	0	0.606096	0	0	0	0	0	0	0	0	0	0	0	0	0	0	0	0.187335	0	0	0	0	0	0	0	0	0	0	0	0	0	0	0	0	0.567498	0	0	0	0	0	0	0	0	0
ENSG00000090621.13	PABPC4	0	0	0	0	0	0.902247	0	0	0	0	0	1.07659	0	0.373418	0.241586	0	0	0	0	0	0.262044	0	0	0	0	0	0	0.26688	0	0	0	0	0	0	0	0	0	0	0	0.364473	0	0	0	0	0.269605	0	0.552102	0
ENSG00000142623.9	PADI1	0	0	0	0	0	0	0	0	0	0	0	0	0	0	0	0	0	0	0	0.228857	0	0	0	0	0	0	0	0	0	0	0	0	0	0	0	0	0	0	0	0	0	0	0	0	0	0	0	0
ENSG00000159339.13	PADI4	0	0	0	0	0	0	0	0	0	0	0	0	0	0	0	0	0	0	0	0	0	0	0	0	0	0	0	0	0	0	0	0	0	0	0	0	0	0	0	0	0	0	0	0	0	0	0	0
ENSG00000158006.13	PAFAH2	0.263777	0.306634	0	0	0.311608	0	0.255961	0	0	0	1.19061	0	0	0.168313	0.800711	0	0.627556	0.292181	0.228832	0	0	0.621366	0	1.27543	0	0	0.297039	0.26688	0.352232	0.250246	0	0.252936	0	1.24132	0	0.710375	0.267418	0.366884	0.359576	0	1.14413	0.537934	0	0	0.537499	0.170753	0	0
ENSG00000099260.10	PALMD	0	0	0	0	0.224177	0	0	0.45884	0	0	0	0	1.66929	0	0	0	0	0	0	0	0	0.246697	0	0	0	0	0	0.533761	0	0	0	0.597308	0	0	0	0	0.267418	0.33668	0	0	0	0	0	0	0.94833	0	0	0
ENSG00000157881.13	PANK4	0	0	0	0	0	0	0.255961	0	0	0	0	0.318948	0	0.168313	0	0	0	0.422015	0	0	0	0	0	0	0	0	0	0	0	0	0	0	0	0	0	0	0.292743	0.183442	0.359576	0.364473	0	0	0	0.350407	0	0.367168	0.276051	0
ENSG00000116183.10	PAPPA2	0.512483	0	0	0.604644	0	0	0.320729	0	0	0	0	0	0	0.374527	0	0.332188	0	0.292181	0.22612	0	0	0.417141	0	0.424084	0	0.322986	0.297039	0	0.892968	0.229511	0.279556	0	0	0.979383	0	3.19355	0	0	0	0	0	0.278177	0.856112	4.88838	0	0	0	0
ENSG00000116288.12	PARK7	0.241694	0	0.406021	0	0	0	0	0	0	0	0	0	0	0.187263	0.241586	0	0	0.292181	0	0	0	0	0	0	0	0	0.594077	0	0.595312	0	0	0	0	0	0	0	0	0	0	0	0	0	0	0	0	0.170753	0	0
ENSG00000143799.12	PARP1	0	0	0	0	0.311608	0	0	0	0	0	0	0	0.285577	0	0	0	0	0	0	0	0	0	0	0	0	0	0	0	0	0.280616	0	0	0	0	0	0	0	0	0.719152	0	0	0	0	0	0	0.183584	0	0
ENSG00000132849.20	PATJ	4.96445	3.27826	0	1.20929	29.1764	0.692129	3.67519	3.08659	14.62	0	0.790169	10.5221	6.80638	16.2317	5.04081	5.84266	17.0128	24.3522	26.2937	7.00077	7.8586	1.15723	9.75386	4.37916	0	1.33381	1.48828	8.41297	1.65201	4.63408	2.48171	5.58047	0.808958	10.3175	8.58854	4.30711	4.29727	9.73975	18.0988	10.0921	8.31479	23.1064	4.05307	18.3784	4.87174	48.0088	8.95859	4.708
ENSG00000185630.18	PBX1	0.263777	0	0	0	0.224177	0.606096	0	0	0.281873	0	0.286956	0	0.571154	0	0.316699	3.53663	1.77318	0.292181	6.12797	0	0	0.910535	0	0.983305	0	0.432484	3.37718	0.26688	0	0.250246	0.547682	1.02714	0	0	0.239396	0.227166	0	0.506354	0	0	2.46545	1.03823	0	0.384392	0	1.43018	0	0.292993
ENSG00000163346.16	PBXIP1	0	0	0	0	0	0	0	0	0	0	0.251606	0	0	0	0	0.332188	0	0	0.228832	0	0	0	0	0	0	0	0	0	0	0	0	0	0	0.377018	0	0	0	0	0	0	0	0	0	0	0	0	0	0
ENSG00000135749.18	PCNX2	4.07182	36.9747	1.05933	20.444	48.0497	19.7465	10.1101	15.7642	9.06607	6.2376	4.71222	16.146	20.2752	4.35501	17.3494	31.7512	4.65529	37.0331	16.1922	2.5258	13.0708	1.33692	19.4044	12.151	1.27621	1.58365	16.5659	10.1101	12.8886	31.0982	10.2636	16.6401	21.6666	9.09757	10.939	19.8943	21.3523	22.264	31.2954	6.89863	5.89784	3.52558	8.50624	15.3037	6.46968	13.2108	4.50995	10.4526
ENSG00000169174.10	PCSK9	0	0	0	0	0	0	0	0	0	0	0	0	0	0	0.633398	0	0	0.422015	0	0.276051	0	0	0	0	0	0	0	0	0	0	0	0.505871	0	0	0	0.571221	0	1.22635	1.06334	0	0	0	0	0	0	0	0	0
ENSG00000116703.13	PDC	0	0	0	0	0.802374	0	0	0	0	0	0	0	0	0	0	0	0	0	0	0	0	0	0	0	0	0	0	0	0	0	0	0	0	0	0	0	0	0	0	0	0	0	0	0	0	0	0	0
ENSG00000184588.17	PDE4B	1.04705	0.613268	0	0	0	0	0	0	0	17.5517	0	0	0	0	0.241586	0.967204	0.801624	0.876544	0	0	0.234719	0.808701	0	0	0	0	11.119	0	8.47332	0	0	0.850243	0	0.261939	0.257402	0.227166	0.292743	0	0	0	0	1.02685	0	0	0.412543	0	0	2.77658
ENSG00000178104.19	PDE4DIP	0.98886	0	0.812043	3.2286	0.535785	0	0	0	0.281873	0	0	0	0.620102	0	0.483172	0	0.35381	0	0	0	0	0.434032	0.310838	0.292128	0	0	0.297039	0	0.352232	0	0	0.298654	0.225925	0	0.257402	0	0	0.16834	0.927074	0	0	0.268967	0	0	0.535787	0.379199	0	0
ENSG00000175087.9	PDIK1L	0	0	0	0	0	0	0	0	0	0	0	0	0	0	0	0	0	0	0	0	0	0	0	0	0	0	0	0	0	0	0	0	0	0	0	0	0	0	0	0	0	0	0	0.350407	0	0	0	0
ENSG00000174827.13	PDZK1	0	0	0	0	0	0	0	0	0	0	0	0	0	0	0	0	0	0	0	0	0	0	0	0	0	0	0	0	0	0.688534	0	0	0	0	0	0	0	0	0	0	0	0	0	0	0	0.189599	0	0
ENSG00000162734.12	PEA15	0	0	0	0	0	0	0	0	0	0	0	0	0	0.186709	0	0	0	0.620888	0	0	0.479282	0	0	0	0	0.468839	0	0	0	0	0	0	0	0	0	0	0.292743	0	0	0	0	0	0	0	0	0	0.989591	0
ENSG00000187800.13	PEAR1	0	0	0	0	0	0	0	0	0	0.547384	0	0	0	0	0	0	0	0	0	0	0	0	0	0	0	0	0	0	0	0	0	0	0	0	0	0	0	0	0	0	0	0	0	0	0	0	0	0
ENSG00000162517.12	PEF1	0	0	0	0	0	0	0	0	0	0	0	0	0	0	0	0	0	0	0	0	0	0	0	0	0	0	0	0	0	0	0	0	0	0	0	0	0	0	0	0	0	0	0	0	0	0	0	0
ENSG00000049246.14	PER3	0	0	0	1.34621	0.311608	0	0.728047	0	0.281873	0	0.538562	0	0	0.730103	0	0	0	0	0.454952	0	0.262044	0	0	1.27225	0	0	2.77692	0.533761	0.595312	0.280616	0	0	0	0	0.810329	0	0	0.535223	0.688377	0	0	0	0.285371	1.02715	0.805392	0.52509	1.15051	0.621996
ENSG00000157911.9	PEX10	0	0	0	0	0	0	0	0	0	0	0	0	0	0	0	0	0	0	0	0	0	0	0	0	0	0	0	0	0	0	0	0	0	0.261939	0	0	0	0	0	0	0	0	0	0	0	0	0	0
ENSG00000142655.12	PEX14	0	0	0	0	0	0	0	0	0	0	0	0	0	0	0	0	0	0	0.22612	0	0	0	0	0	0	0	0	0	0	0	0	0	0.451851	0	0	0	0	0	0	0	0	0	0	0	0.825085	0	0	0
ENSG00000162735.18	PEX19	0	0	0	0	0	0	0	0	0	0	0	0	0	0	0	0	0	0	0.228832	0	0	0	0	0	0	0	0	0.26688	0	0	0	0	0	0	0	0	0	0	0.719152	0	0	0	0	0	0	0	0	0
ENSG00000143256.4	PFDN2	1.51641	0.750769	1.22702	0.604644	1.25073	2.06138	0.320729	0.553919	0.594723	0	2.50544	1.51528	0.571154	0.54284	0	0.291251	0	0	0.909903	0.276051	0.758807	0	1.32598	0	0	0	0	0.176584	1.40893	0	0.559112	0.72849	1.71266	2.78142	0.478793	1.10243	3.04772	0.8417	0.359576	0	2.00662	0	0	3.58195	6.66998	1.2895	0.621351	0.621996
ENSG00000123836.14	PFKFB2	0	0	0	0	0.934823	0	0	0	0	0	0	0	0	0	0.483172	0	0	0	0	0	0	0	0	0	0	0	0	0.176584	0	0.530862	0.279556	0.298654	0.225925	0	0.239396	0	0	0	0	0	0	0	0	0	0	0	0	0
ENSG00000177614.10	PGBD5	0	0	0	0	0	0.256886	0	0	0	0	0	0	0	0	0.316699	0	0	0	0.228832	0	0.496763	0.170444	2.26626	0	0	0	0	0	0	0	0	0	0	0	0	0	0	0	0	0	0	0	0	0	0	0	0.989591	0
ENSG00000142657.20	PGD	0.527554	6.46182	0	0.673104	0.672531	0.388474	0.216125	0.22942	0	0.547384	0	0.637895	0.631504	1.98299	3.98311	1.27003	0.527878	14.1013	7.66737	2.57363	0.262044	0.945364	0	0.691177	1.38541	1.26066	3.86886	0.706337	2.24732	4.21125	0	1.78595	0.451851	1.16284	0.478793	16.0328	1.32553	2.44737	2.3346	0	4.00235	0.192316	0.285371	2.14634	1.07842	6.16007	0	0
ENSG00000079739.15	PGM1	0	0.343846	0.653311	0	0.311608	0	0.648374	0	0.548928	0	0	0.24094	0	0.336626	0	1.165	1.88267	0	3.13874	0	0.976045	0.493394	0.932515	0.876384	0	0	0	0	0.297656	0.959514	0.279556	0	0.269653	0.638958	0.257402	0.710375	1.41307	1.5617	2.81506	0	0	0.192316	0	0.384392	0	0	0	0.637803
ENSG00000204138.12	PHACTR4	1.01795	2.01452	0.406021	1.34621	1.69478	0.606096	0.857584	0.22942	1.14365	0.629299	0.251606	0.998581	2.01521	0.917367	1.0423	0.302829	1.7928	1.72057	0	1.86251	0.938876	0.928474	2.31449	2.07035	1.38541	0.937678	0.7949	2.15817	1.00212	2.51063	0.547682	0.72849	0.269653	0.188509	0.736195	1.61904	0.894606	1.71627	3.51882	0	1.02422	0.384632	1.00466	2.68399	2.42131	3.65485	0.659727	1.48297
ENSG00000134686.18	PHC2	0.241694	0	0	0	0	0.474508	0	0	0	0	0	0	0	0	0	0	0	0	0	0.228857	0	0	0	0.424084	0	0	0.496832	0	0	0	0	0	0.225925	0	0	0	0	0	1.03257	0.728946	0.443369	0.192316	0	0.384392	0	0	1.31945	0
ENSG00000116273.5	PHF13	0.241694	0	0	0	0.311608	0.256886	0.216125	0	0	0	0	0.757641	0	0.561236	0	0.59408	0	0	0	0	0	0.340888	0	0.424084	0	0	0.79387	0.176584	0	0.250246	0.331066	0	0	0	0	0.681498	0	0	0.567498	0	0	0	0	0	0	0.746367	0.659727	0.621996
ENSG00000092621.12	PHGDH	0	0	0	0	0	0	0	0	0	0	0	0	0	0.187263	0	0	0	0	0	0	0	0	0	0	0	0	0	0	0	0.229511	0	0	0	0	0.27011	0	0	0	0.703765	0	0	0	0	0	0	0	0	0
ENSG00000116793.15	PHTF1	1.28874	0	1.97736	0.673104	0.311608	0.606096	0	0.691278	1.08304	0.581	1.47757	0.800829	0.345927	0	1.99239	1.49099	0.527878	0	0.972333	0.78159	0	0.511333	0.310838	0.292128	0	0	1.19124	0.26688	0.595312	1.62296	0	0.429836	1.67373	0.340425	0	2.21914	0.585486	1.02648	3.59048	0.728946	0	1.3072	0.856112	1.24837	4.44635	2.51725	1.88699	1.55279
ENSG00000143393.16	PI4KB	0.798342	1.0574	1.3947	0.604644	4.81945	3.88717	1.63238	1.79912	1.11268	2.25677	0.503213	2.84118	5.94631	1.29023	4.00187	1.57907	7.38609	3.02314	20.4833	1.49144	2.7109	3.28702	2.57709	1.99164	1.85972	1.61493	1.78532	1.83859	4.37311	6.12299	1.95689	1.36554	2.46686	1.61834	4.58874	2.62233	3.35684	2.44737	2.7689	0	1.74255	6.86021	2.58021	6.11269	4.97358	7.73694	2.10923	3.20702
ENSG00000131788.15	PIAS3	0	0	0	0	0	0	0	0	0.801166	0	0	0.438693	0	0	0.241586	0	0	0	0.22612	0	0	0	0.276394	0.848167	0	0.322986	0.298068	0.529753	0	0.500492	0.279556	0	1.34826	0	0	0	0.292743	0	0	0	0	0.556353	0	0	0	0.379199	0	0
ENSG00000142892.14	PIGK	0.263777	0	0.494341	1.20929	3.44103	0.909751	0	0	0.84562	0	1.20133	2.47904	0.345927	0.54284	1.75081	0.582502	1.68899	1.72057	2.0405	0.939342	1.92477	0	0.994488	2.57272	0.583509	1.18796	3.07808	0	1.54286	0	0.279556	0.505871	0.539305	2.33578	0.988299	0.227166	1.43839	0.183442	2.83045	0	1.16838	0	0	1.24837	1.49096	0.891458	0	0.914989
ENSG00000060642.10	PIGV	0	0	0	0	0	0	0	0	0	0	0	0.679634	0	0	0	0	0	0	0	0	0	0	0	0	0	0	0	0.3276	0	0	0	0	0	0	0	0	0	0.183442	0	0	0	0	0	0	0	0	0	0
ENSG00000133056.13	PIK3C2B	0.527554	1.42711	0	0	0	0.388474	0.648374	0	0	0	0.573911	0	0.620102	0.916258	0.316699	1.47941	1.91622	1.24178	2.74788	0.276051	0.262044	0	0	0.292128	0	0	0	0.706337	0.352232	0.750738	0	0	0.903702	0.528934	0.257402	0.648101	0	0.676028	1.03257	0	0.28164	0.556353	0	0	1.6125	0.170753	0.276051	0.34481
ENSG00000171608.15	PIK3CD	0	0	0	0	0	0	0	0	0	0	0	0	0	0	0	0	0	0	0	0	0.262044	0	0	0	0	0	0	0	0	0	0	0	0	0	0	0	0	0	0	0	0	0	0	0	0	0	0	0
ENSG00000117461.14	PIK3R3	1.06913	0	0.732677	2.01931	1.38533	0	0.728047	2.15986	3.90445	0	4.14247	1.27579	3.64552	0.673252	7.49929	7.6311	0	12.8353	8.44532	2.68419	13.0206	0.511333	7.62019	17.0711	0	0.937678	0.595107	14.3482	0.595312	6.20065	0.547682	0.252936	0.269653	2.85991	0	2.41743	0.982139	2.4034	7.81001	1.59954	1.45212	22.1879	4.35047	3.5239	1.07671	11.4607	0.567539	1.82998
ENSG00000158828.7	PINK1	0	0	0	0	0	0	0	0	0	0	0	0	0	0	0	0	0	0	0	0	0	0	0.276394	0	0	0	0	0	0	0	0	0	0	0.261939	0	0	0	0	0	0	0	0	0.4682	0	0	0	0	0
ENSG00000143398.19	PIP5K1A	2.03591	2.60192	0.732677	1.27775	1.69693	2.60395	1.77682	0.22942	1.86939	1.8879	0.538562	0.998581	5.5448	1.4212	3.83288	4.04263	6.81171	1.68806	17.578	0.505539	4.61818	4.24927	1.16068	4.00874	1.96892	3.77735	1.48828	2.00715	5.99532	1.52075	3.38332	1.7462	2.73172	2.25754	1.51581	2.96638	1.83504	4.6198	13.1707	0.364473	0.871274	3.5234	2.0436	2.18033	5.52306	12.0195	3.24431	1.22599
ENSG00000057757.9	PITHD1	0	0	0	0	0	0	0.320729	0	0.267055	0	0	0	0	0	0	0	0	0.292181	0.22612	0	0	0	0	0	0	0.432484	0	0	0	0	0	0	0.269653	0.188509	0	0.227166	0	0	0	0	0	0.576948	0	1.02715	0.267894	0	0	0
ENSG00000143627.18	PKLR	0	0	0	0	0	0	0	0	0	0	0	0	0	0	0	0	0	0	0	0	0	0	0	0	0	0	0	0	0	0	0	0	0	0	0	0	0	0	0	0	0	0	0	0	0.269605	0	0	0
ENSG00000065243.19	PKN2	2.59957	2.62202	2.52469	2.41857	13.3422	12.4247	6.18114	4.98001	11.3978	4.09636	10.0667	13.2573	2.10834	3.57139	8.45358	4.53789	12.4753	12.324	14.2603	3.62938	7.39137	4.13609	5.42283	14.8962	4.63054	4.64189	6.05377	2.72708	13.7605	9.6819	2.78413	3.27922	1.51464	11.3652	8.45929	8.5697	3.29876	3.43121	11.8686	2.8346	2.15956	3.32405	1.75823	14.8655	10.5865	12.4789	3.43568	6.70923
ENSG00000081277.12	PKP1	0	0	0	0	0	0	0	0	0	0	0	0	0	0	0	0	0	0	0	0	0	0	0	0	0	0	0.298068	0	0.297656	0	0	0	0	0	0	0	0	0	0	0	0	0	0	0	0	0	0	0
ENSG00000116711.9	PLA2G4A	0	3.59625	0	0	4.86187	5.61435	3.08156	0.506379	0.53411	0	0	0	1.53718	0	0.558285	1.54971	0	0.913069	5.13204	0	0	0.374669	0	0	0.583509	0.432484	2.67644	1.30082	4.73772	1.12247	0	1.49327	0	1.05281	0.257402	0.648101	0	0	0.344189	1.01224	5.08709	0.537934	0	0.734799	0	0	0	0
ENSG00000149527.17	PLCH2	0	0	0	0	0	0.731394	0	0	0	0	0	0	0	0	0.316699	0	0	0	0.228832	0	0	0	0	0	0.583509	0	0	0	0	0	0	0	0	0	0	0	0	0	0	0	0	0	0	0.384392	0.269605	0	0.276051	0
ENSG00000180287.16	PLD5	0	0.343846	0	0	0	0	0	0	0	0	0	0	0	0	0	0	0	0	0	0	0	0	0	0	0	0	0.993664	0	0	0	0	0	0	0	0	0	0	0	1.78249	0	0	0	0	0	0	0.379199	0	0
ENSG00000143850.14	PLEKHA6	0	0.406923	0	0	0.759961	0	0	0	0.53411	0	0	0	0	0.691648	0.241586	0.302829	0	0	0	0	0	1.16648	0.642334	0	0	0	0	0	0	0	0	0.252936	0	1.20979	0.514804	0	0	0.50502	0.703765	0	0	0.556353	0	0	0	0.354337	0.935778	1.34543
ENSG00000171680.21	PLEKHG5	0	0	0	0	0	0	0	0	0	0	0.251606	0	0	0.187263	0	0	0	0	0	0	0	0	0	0	0	0	0	0	0	0	0	0	0	0	0	0	0	0	0	0	0	0	0	0.350407	0	0	0	0
ENSG00000116786.12	PLEKHM2	1.05511	0.306634	0	0	2.27988	1.74097	1.93821	0	0	2.18953	1.70455	0.318948	0	0.896753	0	0	0	1.86266	1.91397	0.228857	2.56579	0.910535	1.16068	0.399049	0.692705	0.432484	6.45114	0.176584	1.19062	2.25221	0	0	1.34826	0.712388	0	0	1.24956	0.16834	0	0	0	0.845915	0	1.11919	0.53921	0.550752	0.291488	0
ENSG00000187583.10	PLEKHN1	0	0	0	0	0	0	0	0	0	0	0	0	0	0	0	0	0	0	0	0	0	0	0	0	0	0	0	0	0	0	0	0	0	0	0	0	0	0	0	0	0	0	0	0	0	0	0	0
ENSG00000173846.12	PLK3	0	0	0	0	0	0	0	0	0	0	0	0	0	0	0	0	0	0	0	0	0	0	0	0	0	0	0	0	0.297656	0.280616	0	0	0	0	0	0	0	0	0	0	0	0	0	0	0.825085	0	0	0
ENSG00000083444.16	PLOD1	0	0	0	0	0.623215	0	0	0	0.548928	0	0.251606	0	0	0	0	0	0	0	0.457664	0	0	1.74482	0	0.292128	0	0.432484	0	0.353169	0	0.250246	0	0	0	1.3617	0.239396	0	0	0.16834	0.344189	0	0	0	0	0.350407	0.269605	0	0.605915	0
ENSG00000162407.8	PLPP3	0	0.306634	0.494341	0	0.224177	0	0.216125	0.414318	0.281873	0	0.286956	1.11978	0	0.504939	0	0.664375	0	0.422015	4.60756	0.228857	0.234719	0.246697	0.552789	0	0	0	2.08457	0	0.297656	2.13744	0.838668	0	0.56721	0.377018	0.257402	0.4432	0.267418	0.535223	0	0	0	3.33464	0	0.350407	0	0.910305	0	0.621996
ENSG00000117600.12	PLPPR4	0	0	0	0	0	0	0	0	0	0	0	0	0	0	0	0	0	0	0	0	0	0	0	0	0	0	0	0	0	0	0	0	0	0	0	0	0	0	0	0	0	0	0	0	0	0	0	0
ENSG00000117598.11	PLPPR5	0	0	0	0	0	0	0	0	0	0	0	0	0	0	0	0	0	0	0	0	0	0.170444	0	0	0	0	0	0	0	0	0	0	0	0	0	0	0	0	0	0	0	0	0	0	0	0	0	0
ENSG00000076356.6	PLXNA2	0	0	0.406021	1.95085	0.224177	0.388474	7.88724	0.45884	0	0.581	0	0.318948	1.26301	0.355022	1.60142	0.59408	0.537685	2.28468	11.1226	0	1.77966	0.562004	4.96646	0	0	0	0	0.771064	0.297656	2.34186	0.827238	1.11261	0.682569	4.68217	0	0.897532	0	0.338014	0.703765	0	0.871274	0.922566	1.7241	1.78602	0	0	1.51875	0
ENSG00000260238.6	PMF1-BGLAP	0.263777	0	0	0	0	0.217621	0	0.414318	0	0	0.754819	0	0	0.168313	0	0	1.60325	0	0	0	0	0	0	0	0	0	0	0	0	0	0	0.429836	0.952222	0.340425	0	0.355187	0.878229	0.183442	0	0	0	0	0	0	0.535787	0	0.329864	0.310998
ENSG00000163344.5	PMVK	0	0	0	0	0	0	0	0	0	0	0	0	0	0	0	0	0	0	0	0	0	0	0	0	0	0	0	0	0	0	0	0	0	0	0	0	0	0	0.688377	0	0	0	0	0	0	0	0	0
ENSG00000189266.11	PNRC2	0	0	0	0	0	0	0	0	0	0	0	0	0	0	0	0	0	0	0	0	0	0	0	0	0	0	0	0	0	0	0	0	0	0	0	0	0	0	0.344189	0	0	0	0	0	0	0	0	0
ENSG00000143157.11	POGK	0	0	0	0	0	0	0	0	0	0	0	0	0	0	0.241586	0.302829	0	0	0.291262	0	0	0	0	0	0	0	0	0	0	0	0	0	0	0	0	0	0	0	0	0	0	0	0	0	0	0	0.276051	0.292993
ENSG00000143442.21	POGZ	0.270788	0.406923	0.494341	0	0.623215	1.03383	0.216125	0	0	0	0	0	0.905678	0.692202	0	0.908487	0.801624	1.86266	2.81574	0	0	0.246697	0	0.823132	0	0	0.298068	0	0.352232	0.229511	0.279556	0	1.24499	0.340425	0.27011	0.355187	0.534836	0.718665	1.28665	0.506118	0.56328	0.278177	0	0.897968	0.269605	0.51226	0.291488	0.982613
ENSG00000186141.8	POLR3C	0.747165	1.67067	1.05933	0.604644	0.311608	0.217621	0.864499	0.22942	1.08304	0	1.04177	2.20328	0.691854	0.336626	2.45848	1.24067	2.94823	1.46091	4.83097	1.56255	0.234719	2.40866	2.11385	0.584256	2.07811	1.65679	0.7949	1.15381	2.3019	1.00098	0	1.58816	0.341285	1.28322	1.52111	1.55677	0.585486	1.53283	3.5496	0	0	0.653599	3.43618	2.7891	0.680436	4.44686	0	1.29361
ENSG00000121851.12	POLR3GL	0.241694	0	0	0	0	0.256886	0.216125	0	0	0	0	0	0	0.187263	0	0	0	0	0	0	0	0	0	0	0	0	0.594077	0	0.297656	0	0	0	0.225925	0	0	0	0	0	0	0	0	0.192316	0	0	0	0	0	0
ENSG00000085998.13	POMGNT1	0	0	0	0	0	0	0.216125	0	0	0	0	0.24094	0	0	0	0	0	0	0	0	0	0	0	0	0	0	0	0	0	0	0	0	0	0	0	0	0.447303	0	1.04795	0	0	0	0	0.513576	0	0.367168	0	0.310998
ENSG00000143190.21	POU2F1	0	0.613268	0	0	0	0	0	0.276959	0	0	0.251606	0.24094	0	1.10297	0.316699	0.332188	0	1.42839	1.03748	0	0.731482	0.340888	0.662992	0.584256	0	0	0	0	0.352232	0	0	0.682772	0	0.188509	0.257402	0.710375	0	1.22368	0.359576	0.364473	0.290425	0	0	1.54073	0.412543	0.52509	0.329864	0.34481
ENSG00000143847.15	PPFIA4	0	0	0.494341	0	0	0	0	0	1.18945	0	0	0.481881	0	0	0	0	0	0	0	0.276051	0	0	0	0	0	0	0	0	0	0.280616	0	0	0	0	0	0.432068	0	0	0	0	0	0	0	0	0	0	0	0
ENSG00000084072.16	PPIE	0	0	0	0	0	0	0	0.553919	0.267055	0	0.400444	0	0	0	0.316699	0	0	0.620888	0	0	0	0	0	0	0	0	0	0	0.352232	0	0.547682	0	0	0	0	0	0.447303	0.183442	1.49457	0	0	0	0	0	0.267894	0	0.329864	0
ENSG00000243970.2	PPIEL	0	0.306634	0	0	0.311608	0	0.320729	0.276959	0	0	0	0.438693	0.620102	0	0	0.332188	1.05576	0	0.452239	0	0.262044	0.170444	0.310838	0	0	0	0	0	0	0	0	0	0	0	0	0	0	0.338014	0	0	0	0.192316	0	0	0	0.379199	0	0.310998
ENSG00000171960.10	PPIH	0	0	0.812043	0	0	0	0	0	0	0	0.286956	0	0	0	0	0	0	0.84403	0	0	0	0	0	0	0	0	0.298068	0	0	0	0.547682	0	0	0	0	0	0	0.16834	0	1.77895	0.290425	0.268967	0	0	0.267894	0	0	0
ENSG00000155367.15	PPM1J	0	0	0	0	0	0	0	0	0	0	0	0	0	0	0	0	0.273746	0	0	0	0	0	0	0	0	0	0	0	0	0	0	0	0	0.340425	0	0	0	0	0	0	0	0	0	0	0	0	0	0
ENSG00000143224.17	PPOX	0	0	0	0	0	0	0	0	0	1.2586	0.286956	0	0	0	0	0	0	1.24178	0	0	0.469438	0	0	0	0	0	0	0	0	0	0	0	0	0	0	0	0	0	0	0	0	0	0	0	0	0	0	0
ENSG00000077157.21	PPP1R12B	1.5746	6.41009	0.979966	2.48704	3.20995	1.85877	4.28169	2.16288	0.267055	0.581	2.56541	1.40245	4.33737	4.15213	1.35816	4.57882	2.76436	3.34784	3.98788	0.252769	1.96193	0.945364	2.47292	0.823132	2.07811	1.18796	6.15426	2.04475	3.66865	1.71989	3.59994	1.58816	0.836863	1.95371	1.03702	3.12014	1.42944	3.15494	6.79061	1.23506	1.88671	5.06273	1.14148	3.89837	1.75714	3.95265	1.21183	1.84579
ENSG00000117751.17	PPP1R8	0	0	0	1.20929	0	0	0	0	0.281873	0	0.286956	0	0	0.541731	0	0.623439	0.821239	0	0	0	0.234719	0.170444	0	0	0	0	0	0	0	0.280616	0	0	0	1.54515	0	0	0	0.366884	0.911687	0	0	0	0	0	0	1.40452	0	0.689619
ENSG00000066027.11	PPP2R5A	0.263777	0.306634	0	0	3.17659	1.59438	0.511922	0	0	0.629299	0	0.318948	0.977431	1.08568	1.28304	0.91469	0.801624	1.13621	2.08038	0.504909	1.23809	0	0	0.292128	0	0	0.596137	0.26688	0.297656	1.2305	0	1.35611	0.269653	1.09446	0.239396	0.926409	1.095	0.351782	1.60006	0	0.290425	1.1333	0	0.384392	0.412543	0.341506	0	0.637803
ENSG00000131238.17	PPT1	0	0.306634	0	0	0	0	0	0.276959	0.281873	0	0	0	0	0.186709	0	0	0	0	0.228832	0	0.262044	0	0	0.424084	0.583509	0	0	0.176584	0.297656	0	0	0	0	0	0	0.454332	0.292743	0	0	0	0	1.43207	0	0.700813	0.269605	2.58742	0	0.292993
ENSG00000040487.12	PQLC2	0	0	0.406021	0	0	0	0	0	0	0	0	0	0	0.186709	0.241586	0	0	0.292181	0	0	0	0.246697	0	0	0	0	0.496832	0	0	0	0	0	0	0	0	0	0	0.366884	0.359576	0	0	0	0	0	0.537499	0	0	0
ENSG00000143294.14	PRCC	0	0	0	0	0.224177	0	0.320729	0	0	0	0	0	0	0	0	0	0	0	0	0	0	0	0	0	0	0.322986	0	0	0	0.229511	0	0	0	0	0	0	0	0.33668	0	0	0	0	0	0	0.53921	0	0	0.34481
ENSG00000142611.16	PRDM16	0	0	0	0	0.672531	0	0	0.22942	0	0	0	0	0	0.168313	0	0	0	0	0	0	0	0	0	0	0	0	0	0	0	0	0	0	0	0	0	0	0	0	0	0	0	0	0	0.350407	0.535787	0	0	0
ENSG00000116731.22	PRDM2	3.38284	1.22654	0.732677	1.20929	4.77229	8.28183	2.35351	1.28748	1.94482	4.06275	5.13729	2.2381	1.59753	0.729549	3.84997	4.31073	3.91412	15.6435	5.74359	7.17469	4.65094	1.03851	3.30897	11.3378	1.16702	1.51094	0.596137	5.34074	5.97055	1.97013	3.63423	1.28951	2.30048	2.06903	4.03793	4.58124	2.89316	3.8696	6.51103	2.02447	1.71619	5.40755	0.4682	1.59878	12.4019	14.6671	3.41325	5.91588
ENSG00000117450.13	PRDX1	0	1.0574	0	0	0	0	0	0	1.15847	0	0	0	0	0	0.241586	0	0	3.37612	0	0	0	0	0	0	0	0	0.297039	0	0	0	0	0	0.341285	0	0	0.227166	0	0.183442	0.344189	0	0.443369	0	0	0	0	0.562783	0.881966	0
ENSG00000117592.8	PRDX6	0	0	0	0	0	0	0.320729	0	0	0	0	0	0	0	0	0	0	0	0	0	0	0.357779	0	0	0.583509	0	0	0	0	0.229511	0	0	0	0	0	0	0	0	0	0	0	0	0	0	0	0	0	0
ENSG00000162409.10	PRKAA2	0.263777	0	0	0	0	0	0	0	0	0	0	0	0.571154	0	0	0.937846	0.263939	0	0	0	0	0	0	0	0	0.468839	0	0	0	0	0	0	0	0.188509	0	0	0.534836	0.676028	0	0	0	0	0	0	0.269605	0.367168	0	0
ENSG00000131791.7	PRKAB2	0	0	0	0	0	0	0	0	0	0	0	0.24094	0	0	0	0	0	0	0	0	0	0.246697	0	0	0	0	0	0	0	0	0	0	0	0	0	0	0	0.16834	0.567498	0	0	0	0	0	0	0	0	0
ENSG00000142875.19	PRKACB	0	0.306634	1.7124	1.27775	0.802374	0.435243	0.216125	0	0.267055	0	0.400444	1.60166	1.20266	0.374527	0	2.16157	0.791817	0.292181	12.9145	0	3.03523	1.42082	0.310838	0.876384	1.38541	0	11.708	0.655199	2.35647	0.459022	0.559112	2.30722	0	5.23253	0	1.44649	2.68795	3.64619	1.60006	0	0.56328	1.34621	0.4682	0.734799	0.53921	2.42108	0	2.88241
ENSG00000067606.16	PRKCZ	0.812365	0.343846	0	0	0.672531	0.474508	0.57669	0.276959	0	0	0.251606	0.800829	0	2.37258	0.79987	0.635017	0.891495	1.95597	2.17079	0.457715	1.80698	0.417141	0	0	0	0.322986	0	0	0	0	0	0	0	1.01598	0.754201	0.216034	0.292743	2.71788	1.95964	1.09342	0.580849	0.769264	0	0.863982	1.61763	1.38487	7.66113	0
ENSG00000117707.15	PROX1	0	0	0	0	0	2.06888	0	0	0	0	0	0	0	0	0	0	0	0.84403	0	0	0	0	0	0	0	0.468839	0	0	0	0	0	0	0	0	0	0	0	0	0	0	0	0	0	0	0	0	0	0
ENSG00000117360.12	PRPF3	0	0.306634	0.326655	0.604644	0.535785	1.81078	0.648374	0.22942	0.281873	0.547384	2.83421	0.963762	2.51461	1.08402	3.27628	1.54971	4.97142	1.13621	3.14854	0.757678	0.262044	0.493394	1.14002	0.798098	0.583509	2.80796	0.892145	1.27525	1.2452	0.280616	0.279556	0.252936	0.952222	0.638958	0	0.8864	1.88569	2.88489	1.76711	0	1.00665	1.12409	0.4682	0.700813	2.83728	2.35251	1.49581	0.292993
ENSG00000134186.11	PRPF38B	0	0	0	0	0	0	0	0	0	0	0	0	0	0.168313	0	0	0.263939	0	0	0.505539	0	0	0	0	0	0	0	0	0	0	0.279556	0	0	0	0	0	0	0.16834	0	0	0	0	0	0	0	0	0	0
ENSG00000117523.16	PRRC2C	1.52343	2.24673	3.34568	1.88239	6.7003	7.07714	5.4489	1.6565	6.72721	2.29038	1.9915	2.84118	3.38275	1.40336	1.11657	9.45965	3.38211	4.81276	5.49658	1.30978	1.71737	4.87064	2.72174	3.81993	2.07811	5.97019	6.15426	3.76903	9.89468	4.97016	2.85286	2.51444	3.14943	2.25754	1.4851	2.86724	2.52444	4.41371	3.0977	2.38894	1.87792	4.40615	3.73357	6.53422	6.87537	6.11115	3.32899	1.55279
ENSG00000116132.11	PRRX1	0	0	0	0	0	1.63993	0	0	0	0	0	0	0	0	0	0	0	0	0	0	0	0	0	0	0	0	0	0	1.35435	0	0	0	0	0	0	0	0	0	0	0	0	0	0	0	0	0	0	0
ENSG00000143363.15	PRUNE	1.30381	0.957114	0.900362	0.673104	2.0531	0.645361	0.728047	0	2.4035	0.581	1.3041	0.559888	9.0972	2.16803	3.44275	2.17852	3.95902	4.86954	15.2408	1.01045	2.15948	2.1108	1.28467	2.6546	0	2.08928	1.78635	3.91604	5.05648	1.49038	0.559112	1.3104	2.93933	1.3097	1.2457	1.44649	2.31662	2.45004	2.4401	2.28507	1.29707	7.95095	1.68997	0	1.34289	15.3004	1.75643	1.24399
ENSG00000143801.16	PSEN2	0.754177	0.343846	0	0	0	0	0.536854	0.45884	0.281873	0	0	0	0.571154	0.187263	0	0.332188	0	0	0.972333	0	0	0.680729	0.310838	0	0	0	0	0.26688	0.352232	0	1.37492	0	0.836863	0	0	0	1.38774	0.338014	1.42292	0.364473	0.886738	0	0	1.85399	0.267894	0.379199	0.276051	0
ENSG00000143106.12	PSMA5	0	0	0.326655	0	0.224177	0	0	0	0.861778	0	0.400444	0.637895	0	0.711153	0.241586	0.605658	0.791817	0.292181	0.743501	0.276051	0	0.187335	0.932515	0	0	0	0.298068	0	0.561837	1.02026	0	0	0.495578	0.523879	0	0.659234	0.740046	0.521456	0	0.728946	0	0	0	0.513576	1.62877	0.379199	0.276051	0
ENSG00000126067.11	PSMB2	0	0	0	0	0	0.217621	0.216125	0	0	0	0.251606	0	0	0	0	0	0	0	0	0	0	0	0	0.798098	0	0	0.496832	0	0	0.750738	0	0	0	0	0	0	0	0.338014	0.703765	0	0	0.192316	0	0	1.36087	0.683013	0.276051	0.310998
ENSG00000159377.10	PSMB4	0.241694	0	0	0	0	0	0	0	0	0	0	0	0	0	0	0	0	0	0	0	0	0	0	0	0	0	0	0	0	0	0	0	0	0	0.478793	0	0	0	0	0	0	0	0	0	0	0.170753	0	0
ENSG00000159352.15	PSMD4	0.270788	0.306634	0	0	0	0	0.255961	0.414318	0	0	0	0	0.691854	0.168313	0	0	1.06143	0.422015	2.6393	0.276051	0	0.936674	0.953173	0.424084	0	0.432484	0.298068	0	0.352232	0.500492	0	0	0.451851	0.523879	0	0	0	0.85947	0	0	0.28164	0.845915	0	0	0	0	0	1.24399
ENSG00000134222.16	PSRC1	0	0	0	0	0	0	0	0	0	0	0.573911	1.31608	0	0	0	0	0	0	0.291262	0	0.469438	0	0	0	0	0	0	0	0	0.229511	1.11822	0	0	0	0.478793	0	0	0	0.359576	0.506118	0	0	0	0	0.269605	0	0	0
ENSG00000117569.18	PTBP2	1.31888	0.306634	3.60169	2.62396	4.24341	5.94226	0.216125	1.74933	1.08304	2.30507	2.37051	3.60719	3.08577	0.896753	4.05906	11.133	4.16979	4.36647	4.93494	1.33369	2.18681	0.340888	1.20891	3.98011	1.38541	1.18796	5.06423	1.12824	1.19062	0.93878	1.38635	2.93485	2.01501	3.3886	0.975591	9.80781	6.68092	2.11336	10.5872	0.364473	1.31464	0.576948	0.9364	2.14634	2.83043	1.80938	4.6325	9.40018
ENSG00000117425.13	PTCH2	0	0	0	0	0	0	0	0	0	0.581	0	0	0	0	0	0	0	0	0	0	0	0	0	0	0	0	0	0	0	0	0	0	0	0	0	0	0	0	0	0	0	0	0	0	0	0	0	0
ENSG00000134247.9	PTGFRN	0	0	0	0	0	0	0.432249	0.414318	0	0	0	0	0.345927	0.186709	0.241586	0	0.791817	0	0	0	0.262044	0	0.276394	0	0	0	0	0	0	0	0.279556	0.252936	0	0.602365	0	0	0	0.16834	0	0	0	0.461283	0	0	0	0.537921	0.276051	0
ENSG00000184007.19	PTP4A2	12.4422	9.17855	8.92473	9.48042	13.6157	12.065	5.30066	5.24723	5.84927	19.0551	21.7952	5.79518	3.08577	10.3619	2.64288	33.7218	6.50441	8.22963	32.9906	5.13762	7.97995	7.66321	25.5462	9.85532	6.85538	9.03901	15.4834	5.09542	15.5675	9.85449	4.4386	17.5802	4.41503	17.8343	9.35227	19.9054	4.38481	10.3087	20.9037	4.7552	7.29726	13.6367	11.1204	17.3381	25.4234	9.97966	10.1091	5.50344
ENSG00000152104.11	PTPN14	2.3067	0.343846	0.820996	3.62786	4.95835	3.15699	0.216125	0	1.91384	1.70938	2.5119	1.28271	0.285577	0.747945	0.483172	1.51415	2.67035	0.84403	2.30107	0.276051	1.48265	0.681777	1.28467	2.94355	1.38541	0	2.88138	0.443465	2.40235	1.46964	3.61137	0.72849	0	0	0.797622	0.355187	1.92258	0.16834	8.96345	1.74118	0.886738	1.08508	0.502331	2.29959	3.91056	0.72752	4.18802	2.2266
ENSG00000134242.15	PTPN22	0	0	0	0.673104	0	0	0.648374	0.276959	0	0	0	0	0	0.355576	0	0	0	0.292181	0.228832	0	0	0	0	0	0	0	0.298068	0	0.947544	0	0	0	1.41989	0.565528	0	0	0	0	0	0	0	0	0	0	0.269605	0	0.276051	0
ENSG00000142949.16	PTPRF	0.270788	0	0.406021	0.673104	2.00854	0.770659	0	0	0.53411	0	0.251606	0.318948	0	0.336626	0	1.25846	1.16524	0	1.62271	0.457715	1.41816	0	0.60789	0	0.583509	0.468839	0.79387	0.3276	0.297656	0	1.37492	0	0.269653	1.81215	0	0	0.267418	0.16834	3.65203	0	0	1.46971	0	1.05122	1.48754	0.720705	3.62799	0
ENSG00000060656.19	PTPRU	0.263777	0.994326	0.494341	0	2.36946	0.256886	0	0.828636	0.267055	0.581	0	0	0	1.62741	3.03637	1.8116	7.76933	0.620888	0.291262	0	1.00337	0.187335	2.18274	1.27225	0	0	2.77795	0.353169	0.947544	0	0	0	0.76523	0.528934	0.239396	0.227166	0	0.733767	3.4696	0	0.28164	1.04744	0.4682	0.863982	0	6.00215	0.567539	0.932994
ENSG00000134644.15	PUM1	13.3499	11.6858	18.0788	14.1237	23.6446	22.3893	6.76786	4.55897	18.7507	10.2331	11.541	9.88425	8.04324	16.7183	11.9681	15.008	26.9712	35.6856	40.3957	10.2119	35.6663	13.507	23.2721	21.2646	9.7354	6.36632	33.5466	7.67305	18.7253	22.7408	8.58622	9.89626	11.6165	18.2676	12.6604	25.7724	5.47981	15.5633	36.4973	12.6227	10.3369	23.4029	6.38205	38.3336	38.5331	35.8957	13.2388	10.2813
ENSG00000169972.11	PUSL1	0	0	0	0	0	0	0	0	0	0	0	0	0	0	0	0	0	0	0	0	0	0	0	0	0	0	0	0	0	0	0	0	0	0	0	0	0	0	0	0	0	0	0	0	0	0	0	0
ENSG00000116260.16	QSOX1	0	0	0	0	0.311608	0	0	0	0	0	0	0.637895	0	0	0	0	0.35381	0	0.452239	0	0.714001	0	0.331496	0	0	0	0	0.26688	0.561837	0	0	0	0	0	0.257402	0	0	0	0	0	0.290425	0	0	0	0	0	0	0
ENSG00000132698.14	RAB25	0	0	0	0	0	0	0	0	0	0	0	0	0	0	0	0	0	0	0	0	0	0	0	0	0	0	0	0	0	0	0	0	0	0	0	0	0	0	0.344189	0	0	0.192316	0	0	0	0	0	0
ENSG00000117280.12	RAB29	0	0	0	0	0	0	0	0	0	0	0	0	0	0	0	0.291251	0	0	0	0	0	0	0	0	0	0	0	0	0	0.459022	0	0.429836	0	0	0	0	0	0	0	0	0	0	0	0	0	0	0	0
ENSG00000169213.6	RAB3B	0	0	0.494341	0	0	0	0	0	0	0	0	0	0	0	0	0	0	0	0	0	0	0	0	0	0	0	0	0	0	0	0	0	0	0	0	0	0	0	0	0	0	0	0	0	0	0	0	0
ENSG00000118873.15	RAB3GAP2	0.241694	1.40125	0.326655	0.673104	1.73935	0.692129	0.432249	0.276959	1.09786	2.27145	1.69383	0.559888	1.54859	0.728994	0.800711	2.68535	1.43899	1.0429	2.58691	0.481627	0.731482	0.979145	0.994488	1.09023	0	0	0.298068	0.86136	1.54286	0.250246	1.10679	0.935708	1.57419	1.1313	0.239396	0	1.03279	1.53283	2.4401	0.87059	0.28164	1.46971	1.8728	1.02715	1.6125	3.75863	0.859026	0.948801
ENSG00000168118.11	RAB4A	0	0	0	0	0.448354	0	0	0	0	0	0	0	0	0	0	0	0	0	0	0	0	0	0	0	0	0	0	0	0	0	0	0	0	0	0	0	0	0	0	0	0	0	0	0	0	0	0	0.966805
ENSG00000152061.23	RABGAP1L	2.5554	0.406923	0.406021	0	5.14011	5.62064	1.9462	1.2452	3.5916	1.70938	5.91772	2.08354	0.345927	1.23393	0.875824	4.33389	9.68968	1.13621	3.09154	0.228857	3.61397	1.48179	1.10558	2.07353	0	1.51094	2.08457	1.8953	2.08359	4.88814	1.66591	1.69451	1.10652	1.50832	2.48399	3.29269	3.34046	4.85877	6.95765	0.506118	0	3.42833	0.285371	1.4696	8.90041	1.87113	2.12467	0.948801
ENSG00000137955.15	RABGGTB	1.02497	1.70788	0.988682	1.20929	0	0.949016	0	0.276959	0.281873	0	0.538562	0.318948	0	0.187263	0.316699	0	0.273746	0.422015	0.743501	0.228857	0	0.374669	0.863627	0	0.692705	0	0.891116	0.92208	0.352232	0	0.279556	0	0	0	1.47239	0.216034	0.560161	0	0	0	0	0.547144	0	0	0.805392	0	1.17345	0.292993
ENSG00000085999.11	RAD54L	0	0	0	0	0	0.217621	0	0	0.548928	0	0.754819	0	0	0.355576	0	0.302829	0	0.714196	0.808643	0.228857	0.786132	0.187335	0	0	1.16702	0	0.595107	0	0	0.229511	0	0.298654	0	0	0	0	0	0	0	0	0	0	0.502331	0	0.267894	0	0	0
ENSG00000116191.17	RALGPS2	1.85941	1.22077	1.14765	2.01931	6.59262	0	0.216125	1.28972	1.86939	0	0.286956	0.24094	0.571154	0.710598	0	0	0.547492	0.292181	0.681071	0.228857	1.18344	0.170444	1.17446	0.798098	0	0.322986	0.7949	0	1.86161	0.459022	0	0.298654	0.269653	1.16789	3.28161	0.937541	0	0.16834	3.38256	0	0	0	1.35844	0.513576	0	1.45424	1.21183	0.689619
ENSG00000116473.14	RAP1A	1.75005	0.306634	0	0	0	0.513773	0	0	0.815984	0.581	0	0	0	0	0	0.291251	0	0.620888	0	0	0	0	0	0	0.583509	0	0	0.26688	0.297656	0.510128	0	0	0	1.12624	0	0.216034	0.878229	0.16834	1.04795	0	0	0.268967	0	0.350407	0.269605	0.360353	0.276051	0.292993
ENSG00000076864.19	RAP1GAP	0	0	0	0	0	0	0	0.276959	0	0	0	0	0.345927	0.168313	0	0	0	0.422015	0	0	0	0	0	0	0	0	0	0	0	0	0	0	0	0	0	0.937541	0	0.183442	0.719152	0	0	0	0	0	0	0	0	0
ENSG00000075391.16	RASAL2	0.769248	0.687692	0	0	1.60735	0.513773	0	0.968237	2.82141	0	0.573911	2.64198	0	2.28005	0	0.91469	0.981367	1.46492	1.09991	0.91543	2.27642	0.434032	0.898071	0.716212	1.85972	1.29195	1.19124	0	0.595312	2.18419	1.10679	0.298654	1.41989	1.77531	1.72979	0.582353	0.827579	0	5.72727	1.23506	0	1.32562	0.753571	1.5648	0.950041	1.94164	0.912839	1.82998
ENSG00000266094.7	RASSF5	0	0	0	0	0	0	0	0	0	0	0	0	0	0	0	0	0	0	0	0	0	0	0	0	0	0	0	0	0	0	0	0	0	0	0	0	0	0	0	0	0	0	0	0	0	0	0	0
ENSG00000162437.14	RAVER2	2.57047	4.98038	0.988682	0	4.19194	2.84583	0.792815	0.506379	2.88203	0.581	5.50239	0.722821	2.84914	3.73915	1.19168	3.70507	11.5796	10.2992	10.2488	0.481627	2.93577	1.07334	3.37786	7.83186	0	1.40144	4.56755	1.80901	1.48828	2.44407	2.20216	7.21984	0.56721	4.66676	0.754201	9.26547	4.49767	3.02923	1.07873	0	1.70741	8.17524	0	1.11919	5.81236	4.54711	0.291488	2.69095
ENSG00000162521.18	RBBP4	0.812365	0	0	0.673104	0.535785	0.862982	0.216125	0.414318	0.267055	0.581	0	0	0	0.168313	0.241586	0.664375	0.547492	0.620888	0.811356	0	0.262044	0	0	0.292128	0.692705	0	0	0	0.297656	1.01062	0	0	0.225925	0	0.27011	0	0	0.843034	0.344189	0	0	0	0	0	0.412543	0.170753	0	0
ENSG00000117222.13	RBBP5	0.270788	0	0	0.604644	0.224177	0	0.255961	0	0.267055	0.629299	0	0	0	0.374527	0	0.582502	0	0	0	0	0.479282	0.170444	0.994488	0.876384	0	0	0	0	0	0	0	0.682772	0	0.261939	0.27011	0	0	0	3.14386	0.364473	0	0	0	0	0	0.758398	0.291488	0.603991
ENSG00000188739.14	RBM34	0	0.343846	0	0	0	0	0.57669	0.414318	1.63197	0	0.251606	0.679634	0	1.12192	0	0.955627	0.70762	2.08581	0.683784	0.228857	0	1.1327	0.331496	0.292128	0	0	0	0	0.595312	0.93878	0	0.429836	0	2.10057	1.04232	1.03669	0.534836	0.16834	1.135	0.506118	0.853705	0.931775	0.4682	0	0.53921	1.57447	0.605915	0.621996
ENSG00000265241.6	RBM8A	0	0	0	0	0	0	0	0	0.267055	0	0	0	0	0	0	0	0	0	0	0	0	0	0	0	0	0	0	0	0	0	0	0	0	0	0	0	0	0	0	0	0	0	0	0	0	0	0	0
ENSG00000162444.11	RBP7	0	0	0	0	0	0	0	0	0	0	0	0	0	0	0	0	0.35381	0	0	0.457715	0.479282	0.528223	0	0	0	0.432484	0	0	0	0	0	0	0	0	0	0	0	0	0	0	0	0	0	0	0	0	0	0
ENSG00000135870.11	RC3H1	0.534565	0	0.812043	1.88239	3.12252	2.41809	0.216125	0.920698	2.53954	1.12838	1.3041	1.19778	0.905678	0.711153	1.91896	1.20594	3.39191	0.584363	3.60078	1.03436	1.49029	2.07806	1.8719	0.716212	0.692705	0.864969	0.298068	0.796633	1.78594	1.97977	1.09536	1.87142	0.721503	2.29895	0.993597	2.69921	0.534836	3.41611	1.27126	0	1.01543	0.931775	1.54127	0.897968	2.16626	2.22025	0.874463	0
ENSG00000117602.11	RCAN3	3.18531	1.94009	0.406021	1.95085	3.12252	1.78024	0.728047	1.4716	1.61715	4.72566	0.939007	1.84115	0	4.11534	2.95958	1.86411	2.74474	7.94147	7.94778	2.29632	0.234719	3.50708	0	2.1236	0.692705	1.29195	0.496832	4.6128	2.15927	0.760374	1.39778	1.11261	0.947429	6.31663	5.85775	1.14244	0.560161	0.858136	6.64424	1.09342	2.31461	4.29049	0.4682	4.0244	4.05008	7.3826	4.67838	1.27561
ENSG00000180198.15	RCC1	0.270788	0	0.406021	0	0.448354	0	0	0	0	0	0.538562	0	0	0	0	0.332188	0.35381	0	0	0	0	0.246697	0	0	0	0	0.594077	0.533761	0	0.280616	0	0	0	0	0	0.216034	0.447303	0	0	0	0.580849	0	0	1.02715	0.412543	0.379199	0	0
ENSG00000179051.13	RCC2	0	0.343846	0	0	0.224177	0.823717	0.255961	0.22942	0.267055	0	0	0	0	0.168313	0	0.302829	0	0	0.457664	0	0	0	0	0	0	0	0.298068	0	0	0	0	0	0	0	0	0.454332	0	0	0.719152	0	0	0	0	3.81309	0.269605	0.189599	0.329864	0.621996
ENSG00000117625.13	RCOR3	0.754177	0.306634	0	0	0.224177	1.12737	0.767883	0.965219	0.563747	0	0.251606	1.43872	1.59753	0.673252	0.241586	0.635017	0.35381	0.84403	1.26088	0	0	0.170444	0	0	0	0	0.297039	0.706337	0	0.250246	0	0	0.269653	0	0.257402	0.4432	0	0.550325	0.359576	1.09342	0.28164	0	0	0	0.269605	0	0	0
ENSG00000157916.19	RER1	2.40204	0	0.494341	0	0	0.435243	0	0	0.267055	0	0.903657	0	0	0	0.241586	0	0.35381	0.620888	0.22612	0	0	0	0	0	1.85972	0	0.496832	0	0	0.250246	0	0	0	1.04776	0	0.227166	0.894606	0.676028	0	0	0	0.470492	0	0	0.269605	0.183584	0.276051	1.24399
ENSG00000142599.17	RERE	23.9699	18.7065	4.48438	5.24791	23.8333	28.7091	14.654	11.139	14.6089	9.31686	19.9246	9.04716	15.148	7.16228	15.806	18.7819	16.941	45.8346	21.1535	5.25655	49.9399	13.3246	13.7267	14.8866	7.76648	15.4886	40.6047	18.9481	23.1777	9.18815	8.58622	8.99684	10.549	21.6632	8.26543	17.0883	47.5957	22.4612	36.0239	10.4678	7.53708	26.3495	5.99428	14.331	49.9866	42.7994	5.00824	48.8304
ENSG00000143207.19	RFWD2	25.487	9.79758	2.61277	5.7841	30.7387	21.3312	7.22192	2.99151	5.83177	3.96615	3.59975	10.951	7.54384	5.87041	7.67164	12.5119	5.50343	19.0522	7.02974	2.80059	10.9682	5.85083	10.6588	10.8637	3.13594	2.37591	17.8641	11.0442	11.6893	7.41423	4.6953	8.61964	3.88196	9.01307	11.7112	9.10405	5.59266	2.40607	27.9831	3.70519	3.12439	5.11015	3.23124	12.878	10.2467	7.93823	6.32718	14.268
ENSG00000143390.17	RFX5	0	0	0	0	0	0	0	0	0	0	0	0	0	0	0.316699	0	0	0	0	0	0	0.170444	0	0	0	0	0	0	0	0	0	0	0	0	0	0	0	0	0	0	0	0	0	0	0	0	0	0
ENSG00000143344.15	RGL1	0	0	0.732677	0	0	1.41602	0	0	0.594723	0.581	0	0	0	0	0	1.87569	0	0.292181	0	0.276051	0.479282	1.19311	0	0.292128	0	0	0	0.59448	0.297656	0.561233	0	0	0	0	0	0	0	0	0	0	0	0.268967	1.2559	0	0	1.09469	0	0
ENSG00000143248.12	RGS5	0.241694	0	0	0	0	0	0	0.22942	0	0	0	0	0	0	0	0	0	0	0	0	0	0	0	0.798098	0	0.468839	0	0	0	0	0	0	0	0	0	0	0	0	0	0	0	0	0	0	0.267894	0	0.329864	0
ENSG00000182901.16	RGS7	0	0	0	0	0	0.388474	0	0	0	0	0	0	0	0	0	0.332188	0	0	0	0	0	0.246697	0	0	0	0	0	0	0	0	0	0	0	0	0	0	0	0	0	0	0	0	0	0	0	0	0	0
ENSG00000121446.18	RGSL1	0	0	0	0	0	0	0	0	0	0	0	0	0	0	0	0	0	0	0	0	0	0	0	0	0	0	0	0	0	0	0	0.72849	0	0	0	0	0	0	0	0	0	0	0	0	0	0	0	0
ENSG00000158315.10	RHBDL2	0.263777	0	0	0.604644	0	0	0.857584	1.05806	0	0.581	0	0	0	0.187263	0	0.302829	0	0.292181	0.904479	0	0.958564	0	0.276394	0	0	0	0	0	0	0	0	0.252936	0.610937	0	0	0.216034	0	0	0	0	0.886738	0.470492	0	0.897968	0	0.51226	0	0
ENSG00000155366.16	RHOC	0	0	0	0	0.311608	0	0	0	0	0	0	0	0	0	0	0	0	0	0	0	0	0	0	0	0	0	0	0	0	0	0	0	0	0	0	0	0	0	0.359576	0	0	0	0	0	0	0	0	0
ENSG00000177181.14	RIMKLA	0.527554	0	0	0	0.311608	0	0	0.22942	0.267055	0	0	0	0	0	0	0	0.273746	0	0.291262	0	0	0.357779	0	0	0	0	0	0	0.595312	0	0	0.429836	0	0.261939	0	0	0.267418	0	0	0	0	0	0	0	0.267894	0.531106	0	0.292993
ENSG00000117016.9	RIMS3	0	0	0	0	0	0	0	0	0	0	0	0	0	0	0	0	0	0	0	0	0	0	0	0	0	0	0.496832	0	0	0	0	0	0	0	0	0	0	0	0.344189	0	0	0	0	0	0	0	0	0
ENSG00000143622.10	RIT1	0	0.306634	0.326655	0.673104	0.311608	0	0.857584	0	0	0.547384	0	1.76459	0.285577	1.12192	1.60142	0.996563	0	1.13621	4.47999	0.252769	0.758807	0	1.10558	0.691177	0	0.468839	1.39104	0.796633	1.19062	0.280616	0	2.05429	0	2.92804	0.54022	1.9777	3.16058	0.338014	2.54253	0	2.15078	0.576948	2.14614	0	0.53921	6.65348	3.25975	1.22379
ENSG00000117000.8	RLF	0.769248	0.713557	1.30638	5.11099	7.26945	4.61857	3.01883	0.828636	4.68946	2.33868	4.14247	8.07937	0.917081	2.69248	3.20116	2.54627	7.06584	4.28919	2.10836	6.40858	6.0713	0.945364	3.83423	3.63791	2.55243	1.07846	7.64239	6.04864	4.47357	2.92818	1.38635	0.551589	3.00617	7.74647	0.509506	1.36961	4.69393	6.78202	19.4909	2.5079	1.4082	10.0743	0.856112	1.79594	2.68749	5.88112	2.66927	6.33071
ENSG00000123091.4	RNF11	0	0	0	0	0	0	0	0	0	0	0	0	0	0	0	0	0.273746	0	0	0	0	0	0	0	0	0	0	0	0	0	0	0	0	0	0	0	0	0	0	0	0	0	0	0	0	0	0	0
ENSG00000265491.4	RNF115	0.270788	2.32115	0.406021	0.673104	0.672531	0.823717	0	0.22942	1.63197	0	2.23239	2.89129	0	0.336626	0.241586	0.332188	1.96687	0	5.89914	0	0.524088	2.3427	0.310838	0.292128	0	1.18796	0.298068	0.353169	0.704464	0.760374	0	1.28951	1.07861	2.41957	0.988299	1.21932	1.51698	1.7025	2.19834	0	0.725009	0.816111	0.502331	0.734799	0.807103	0	0.552102	0
ENSG00000116514.16	RNF19B	4.05078	0.713557	4.83742	2.41857	3.35145	2.46486	1.99295	0.873158	3.50135	2.43528	5.80423	2.27984	2.43146	7.10601	1.04146	5.01067	3.82992	5.56348	7.33727	3.53625	6.37051	8.08799	4.8907	2.14864	0.692705	4.64189	2.3794	0.655199	8.23027	3.21026	1.9226	3.93167	2.70861	3.45697	1.5084	2.67694	5.27199	6.9708	26.3905	0	2.60293	3.97685	1.35844	3.90829	5.52306	5.59809	2.37028	1.69024
ENSG00000121481.10	RNF2	0.725083	0.343846	0	1.20929	1.20832	0.949016	0	0.22942	0.830802	0.547384	0.400444	0.318948	0	1.25288	0.483172	0	1.06556	2.96235	0	0	1.96957	0.246697	1.10558	3.13194	0	0	0.496832	0.529753	1.54286	0	0.547682	0	0.225925	0.864304	0	0.681498	0.878229	0.50502	3.50344	0	0	0.192316	0	0.350407	1.3446	0.189599	0	1.86379
ENSG00000158286.12	RNF207	0.263777	0	0	0	0	0	0	0.276959	0	0	0	0	0	0	0	0	0	0	0	0	0	0	0	0	0	0	0	0	0	0	0	0	0	0	0	0	0	0	0	0	0	0	0	0	0	0	0	0
ENSG00000187147.17	RNF220	0.241694	0	0	0.673104	0	0	0.511922	0.414318	0	0	0	0.757641	0	0.523335	0	1.24067	0	0	2.49545	2.45533	0	0.562004	0	0	0	0	0.496832	0	0.352232	2.23965	4.13619	0.252936	0.539305	0	0	0	0.292743	0	0	3.52014	0	0.537934	0	0	2.29293	0.341506	0	0.292993
ENSG00000185946.15	RNPC3	0	0	0	0	0	0	0	0	0.267055	0	0.286956	0	0.966029	0.336626	0.483172	0	0	0	0	0	0.479282	0	0	0	0	0	0	0.680768	0	0	0	0.505871	0	0.340425	0.239396	0	0	0	0	0	0	0	0	0	0	0.379199	0	0.689619
ENSG00000176393.10	RNPEP	0.534565	0.306634	0.494341	1.34621	0.448354	0.99457	0.216125	0.783339	0.267055	0	0.652051	0.559888	0	1.06562	0.724757	0.873753	1.67918	1.55823	1.03748	0.457715	0.714001	0.357779	0.898071	0.691177	0.583509	0.468839	0.298068	0.882921	0.352232	1.06172	0	0.298654	0	1.1313	0.239396	0.454332	0	0.520122	1.37675	0.364473	1.12656	2.91099	0	1.75203	0.269605	2.16893	1.71805	0.292993
ENSG00000185483.11	ROR1	0	0.406923	0	3.02322	11.4995	0.217621	7.52775	1.0603	1.33528	0	0.251606	0.438693	0	0	2.21689	0	0	0	0.457664	0	0.786132	0	0	0	0	0	0	0	2.11339	0	0	0	0	4.00637	1.62066	0	0	0	3.95534	0.87059	0	0	0	0	0.807103	0	0.874463	0
ENSG00000284678.1	RP1-118J21.28	0	0	0	0	0	0	0	0	0	0	0	0	0	0	0	0	0	0	0	0	0	0	0	0	0	0	0	0.176584	0	0	0	0	0	0	0	0	0	0	0	0	0	0	0	0	0	0	0	0
ENSG00000237975.6	RP1-14N1.2	0.270788	0	0	0.604644	0	1.64743	0	0	0	0	0	0.559888	0	0	0.483172	0.59408	0.263939	0	0.228832	0	0	0	0	1.22218	0	0	0	0.655199	0	0.280616	2.74984	0.505871	4.55724	0	0	0	0.292743	0	2.19834	0	1.00665	0	0	0	14.4209	0	0	2.76297
ENSG00000284686.1	RP1-158P9.3	0	0.306634	0	0	0	0	0	0	0	0	0	0.318948	0	0	0	0	0	0	0	0	0	0	0	0	0	0	0	0	0	0	0.547682	0	0	0	0	0	0	0	0	0	0	0	0	0	0	0	0	0
ENSG00000254553.1	RP1-27O5.3	0.505471	0	0	1.20929	0	1.64743	0.216125	0.22942	0	0	0.251606	0.757641	2.38251	1.12247	0.800711	0.926268	3.11817	0.620888	5.48844	0.481627	1.26541	1.00473	2.40403	0.584256	2.07811	2.41226	0.596137	1.18896	0	0.561233	1.11822	0	0.682569	1.42983	0.988299	1.23045	0.740046	1.77401	1.03257	2.5079	0	1.1539	0.4682	0.897968	1.07157	1.59412	0.912839	0
ENSG00000268575.1	RP1-283E3.8	0.483388	0	0	0	0	0	0	0.276959	0	0	0	0	0	0	0	0	0	0	0	0	0	0	0	0	0	0	0	0	0.352232	0	0	0	0	0	0	0	0	0	0	0	0	0	0	0	0.269605	0	0	0
ENSG00000230426.3	RP11-108M21.1	5.62433	0	0	0	0	0.388474	0	0	0	0	0	0	0	0	0	0	0.527878	0	0	0.457715	0	2.3406	0	0	1.85972	2.30277	0.297039	0	0	0	0	0	0	0	0	4.1457	0	0.16834	0	0	0	0.73025	0	0	0	0.189599	0	0
ENSG00000223653.5	RP11-131L23.1	0	0	0	0	0	0	0	0	0	0	0	0	0	0	0	0	0	0	0	0	0	0	0	0	0	0	0	0	0	0	0	0	0	0	0	0	0	0	0	0	0	0	0	0	0	0.183584	0	0
ENSG00000285280.1	RP11-139E24.1	0	0	0	0	0	0	0.255961	0	0	0	0	0	0	0	0	0	0	0	0	0	0	0.170444	0	0.292128	0	0	0	0.533761	0	0	0	0	0	0	0	0	0	0	0	0	0.443369	0	0	0	0	0.170753	0	0
ENSG00000224613.6	RP11-153F1.1	0	0	0	0	0	0	0	0	0	0	0	0	0	0	0	0	0	0	0	0	0	0	0	0	0	0	0	0.3276	0	0	0	0	0	0	0	0	0	0	0.344189	0	0	0	0	0	0	0	0	0
ENSG00000226891.7	RP11-182I10.3	0	0	0	0	0	0	0	0.414318	0	0	0	0.24094	0	0	0	0.302829	1.42918	0	1.36485	0	0	0	0	0	0	0	0	0	0	0	0	0	0	0.261939	0	0.355187	0	0.338014	0	0	0	1.39306	0	0	0.269605	0	0	0
ENSG00000237413.5	RP11-183M13.1	0	0	0	0	0	0	0	0	0	0	0	0	0	0	0.950096	0	0	0	0	0	0	0	0	0	0	0	0	0	0	0	0	0	0	0	0.27011	0	0	0	0	0	0	0	0	0	0	0	0	0
ENSG00000236200.5	RP11-184I16.2	0	0	0	0	0	0	0	0	0	0	0	0	0	0.187263	0	0	0	0	0	0	0	0	0	0	0	0	0	0	0	0	0	0	0	0.188509	0	0	0	0	0	0	0	0	0	0	0	0	0	0
ENSG00000227925.1	RP11-191N8.2	0	0	0	0	0	0	0	0	0	0	0	0	0	0	0	0	0	0	0	0.228857	0	0	0	0	0	0	0	0	0	0	0	0	0	0	0	0	0	0	0	0	0	0	0	0	0	0	0	0
ENSG00000230092.7	RP11-206L10.8	3.69884	1.30096	1.48302	1.81393	2.40973	2.94566	3.99592	2.62775	2.53954	1.70938	0.286956	1.48046	1.66929	1.77677	5.3463	2.75565	4.79735	3.74558	0	4.15946	1.73485	2.47727	0.587232	7.83186	1.38541	0.864969	4.56533	3.35114	11.0184	1.65333	1.65448	5.66594	2.62115	4.02274	1.04232	2.24488	0.292743	1.71627	7.64603	2.87237	3.6029	2.17153	1.97534	0.700813	3.49117	3.28327	1.20433	3.08758
ENSG00000203761.5	RP11-243J18.3	0	0	0	0	0	0	0	0	0	0	0	0	0	0	0	0	0	0	0	0	0	0	0	0	0	0	0	0	0	0	0	0	0	0	0	0	0	0	0	0	0	0	0	0	0.267894	0	0	0
ENSG00000271741.1	RP11-244H3.4	0	0	0.494341	0	0.448354	0.217621	0.216125	0	0	0	0.251606	0	1.19126	0.560681	0.559125	0.291251	0.263939	0.584363	0.454952	1.1042	0.234719	0.357779	0.331496	0	0	0	0	0.3276	0.297656	0	0	0.298654	0.610937	0.450448	0	0.227166	1.77283	0	0.719152	0	0.28164	0.547144	0	0	0.412543	0	0.276051	0
ENSG00000214837.8	RP11-261C10.3	0	0	0	0	0	0	0	0	0	0	0	0	0	0.187263	0	0	0	0	0	0	0	0	0	0	0	0	0	0	0	0	0	0	0	0	0	0	0	0	0	0	0	0	0	0	0	0	0	0
ENSG00000231064.7	RP11-263K19.4	0	0	0	0	0	0	0	0	0	0	0	0.24094	0	0	0	0	0	0	0.228832	0	0	0	0	0	0	0	0	0	0	0	0	0	0	0	0	0	0	0	0	0	0	0	0	0	0	0	0	0
ENSG00000285053.1	RP11-293G6.1	2.90646	3.17221	2.03906	2.5555	3.75264	1.80449	2.77086	0.828636	1.37973	1.2103	0.503213	2.67825	1.66929	4.61863	2.25023	2.80196	1.78299	5.37686	4.57854	1.33306	1.02085	7.83365	1.74791	1.6713	0.583509	0.937678	1.78429	1.00837	4.73405	3.13842	1.37492	2.66651	2.78024	4.32658	0.496798	3.39845	1.97323	1.34805	5.46308	0.728946	0.572065	1.94941	2.07773	3.68707	3.2267	14.6882	1.26564	1.5866
ENSG00000203739.3	RP11-296O14.3	0	0.406923	0	0	0	0	0	0	0.267055	0	0	0	0	0	0	0	0.35381	0	0	0	0	0.246697	0	0	0	0	0	0	0	0	0	0	0	0.523879	0	0	0	0	0.688377	0.506118	0	1.02685	0	0	0	0	0	0
ENSG00000271949.1	RP11-302M6.4	0	0	0	0	0	0	0	0	0	0	0.400444	0	0	0	0	0	0	0	0	0	0	0	0	0	0	0	0	0	0	0	0	0	0	0	0	0	0	0	0	0	0	0	0	0	0	0.183584	0	0
ENSG00000226419.7	RP11-31F15.1	0	0	0	0	0	0	0	0	0	0	0	0	0	0	0	0	0	0	0	0	0	0	0	0	0	0	0	0	0	0	0	0	0	0	0	0	0	0	0.359576	0	0	0	0	0	0	0	0	0
ENSG00000279457.4	RP11-34P13.18	0	0	0	0	0	0	0	0	0	0	0	0	0	0	0	0	0	0	0	0	0	0	0	0	0	0	0	0.26688	0	0	0	0	0	0	0	0	0	0	0	0	0	0	0	0	0	0	0	0
ENSG00000234232.7	RP11-353N4.5	0	0	0	0	0	0	0	0	0	0	0	0	0	0	0	0	0	0	0	0	0	0	0	0	0	0	0	0	0	0	0	0	0	0	0	0	0	0	0	0	0	0	0	0	0.267894	0	0	0
ENSG00000272419.6	RP11-403I13.8	0	0	0	0	0	0	0	0	0	0	0	0	0	0	0.316699	0	0	0	0	0	0	0.528223	0	0	0	0	0	0	0	0	0	0	0	0	0	0	0	0	0	0	0	0	0	0	0	0	0	0
ENSG00000224445.3	RP11-413P11.1	0	0	0	0	0	0	0	0	0	0	0	0	0	0	0	0	0	0	0	0	0	0	0	0	0	0	0	0	0	0	0	0	0	0	0	0	0.292743	0	0	0	0	0	0	0	0	0	0	0
ENSG00000231365.5	RP11-418J17.1	0	0	0	0	0	0	0	0	0	0	0	0	0	0	0	0	0	0	0	0	0	0	0	0	0	0	0	0	0	0	0	0	0	0	0	0	0	0.183442	0	0	0.290425	0	0	0	0	0	0	0
ENSG00000233184.6	RP11-421L21.3	0	0	0	0	0	0	0	0	0	0	0	0	0	0	0	0	0	0	0	0	0	0	0	0.424084	0	0	0	0	0	0	0.547682	0	0	0	0	0	0	0	0	0	0	0	0	0	0	0	0	0
ENSG00000223883.1	RP11-424D14.1	0.270788	0	0	0	0	0	0	0	0	0	0	0	0	0	0	0	0	0	0	0	0	0	0	0	0	0	0	0	0	0	0	0	0	0	0	0	0	0	0	0	0	0	0	0	0	0	0	0
ENSG00000238290.1	RP11-431K24.1	0	0	0	0	0	0	0	0	0	0	0	0	0	0	0	0	0	0	0	0	0	0	0	0	0	0	0	0	0	0	0.279556	0	0	0	0	0	0	0	0	0	0	0	0	0	0	0	0	0
ENSG00000223519.8	RP11-439E19.8	0	0	0	0	0	0	0	0	0	0	0	0	0	0	0	0	0	0	0	0	0	0	0	0	0	0	0	0	0	0	0	0	0	0	0	0	0	0	0	0	0	0	0	0	0	0	0	0
ENSG00000256407.2	RP11-446E24.4	0	0	0	0	0	0	0	0	0	0	0.286956	0	0	0	0	0	0	0	0	0	0	0	0	0	0	0	0	0	0	0	0	0	0	0	0	0	0	0	0	0	0	0	0	0	0	0	0	0
ENSG00000228106.5	RP11-452F19.3	0.241694	0.343846	0	0	0.448354	0.909751	0.216125	0	1.08304	0	0.974356	0	0	0	0.559125	0.302829	0	0	6.6869	0.252769	0.731482	0.545114	0.276394	1.75277	0	0.322986	0	0	1.70658	0.229511	0	0	0.341285	1.05281	0.239396	0.582353	0.447303	1.35206	1.72094	0.364473	1.31464	0.384632	0	1.05122	1.09469	0.866597	0	0
ENSG00000278610.1	RP11-455P21.3	0	0	0	0	0	0	0	0	0	0	0	0	0	0	0	0	0.35381	0	0	0	0	0	0	0	0	0	0	0	0.297656	0	0	0	0.269653	0	0	0.216034	0	0	0	0	0	0	0	0	0	0	0	0
ENSG00000213240.8	RP11-458D21.5	0	0	0	0	0.224177	0	0.320729	0	0	0	0	0	0	0	0	0	0	0	0.457664	0	0	0	0	0	0	0.468839	0.298068	0	0	0	0	0	0	0	0	0	0	0.16834	0.344189	0	0	0	0	0	0	0	0	0
ENSG00000230461.8	RP11-478J18.1	0	0	0	0	0	1.0806	0	0	0	0	0	0	0.691854	0	0	0	0	0	0	0	0	0	0	0	0	0	0	0	0	0	0	0	0	0	0	0	0	0	0	0	0	0	0	0	0	0	0	0
ENSG00000214796.8	RP11-480I12.5	0	0	0	0	0	0	0	0	0	0	0	0	0	0	0	0	0	0	0	0	0.234719	0	0	0	0	0	0	0	0	0	0	0	0	0	0	0	0	0	0.344189	0	0	0	0	0	0	0	0	0
ENSG00000241361.8	RP11-483I13.3	0	0	0	0	0	0	0	0	0	0	0	0	0	0	0	0	0	0	0	0	0	0	0	0	0	0	0	0	0	0	0	0	0	0	0	0	0	0	0	0	0	0	0	0	0	0	0	0
ENSG00000272645.3	RP11-504P24.2	0.812365	1.68202	0	2.41857	1.51517	0.435243	1.15338	1.88669	2.99688	0	0.286956	0	0.571154	0	1.67738	0.59408	2.14093	1.75309	3.55463	0	3.40657	3.38121	1.49218	2.65779	1.85972	0.864969	3.57491	2.07589	1.19062	0	3.02939	3.36468	0.539305	1.20979	0.257402	0.432068	3.52035	0.703563	4.48678	3.01402	0.290425	2.26878	3.23109	3.16358	2.04644	0.872612	1.97867	0.689619
ENSG00000185495.10	RP11-504P24.3	0	0	0	0	0	0	0	0.22942	0	0	0	0	0	0	0	0	0	0	0	0	0	0	0	0	0	0	0	0	0	0	0	0	0	0	0	0	0	0	0	0	0	0	0.4682	0	0	0	0.276051	0
ENSG00000229930.1	RP11-504P24.5	0.263777	0	0	0	0	0	0	0	0	0	0	0	0	0	0	0	0	0	0	0	0	0	0	0	0	0	0	0	0	0	0	0	0	0	0	0	0	0	0	0	0	0	0	0	0	0	0	0
ENSG00000232284.7	RP11-518D3.1	0	0	0	0	0	0	0	0	0	0	0	0	0	0.336626	0	0	0	0	0	0	0	0	0	0	0	0	0	0	0	0	0	0	0	0.188509	0	0	0	0	0	0	0	0	0	0	0	0	0	0
ENSG00000237292.1	RP11-540K16.1	0	0	0	0	0	0	0	0	0	0	0	0	0	0	0	0	0	0	0	0	0	0	0	0	0	0	0	0	0	0	0	0	0.269653	0	0	0	0	0	0	0	0	0	0	0	0	0	0	0
ENSG00000228215.2	RP11-541F9.2	0	0	0	0	0	0	0	0	0	0	0	0	0	0	0	0	0	0	0	0	0	0	0	0	0	0	0	0	0	0	0	0	0	0	0	0.582353	0	0	0	0	0	0	0	0	0	0	0	0
ENSG00000237781.3	RP11-54A4.2	0	0	0	0	0	0	0	0	0	0	0	0	0.345927	0	0	0	0	0	0	0	0	0	0	0	0	0	0	0	0	0	0	0	0	0	0	0	0	0	0	0	0	0	0	0	0	0	0	0
ENSG00000231789.2	RP11-558F24.4	0.270788	0	0	0	0	0	0	0	0	0	0	0	0	0	0	0	0	0	0	0.228857	0	0	0	0	0.583509	0	0	0	0	0	0	0	0	0	0	0	0.560161	0	0	0	0	0	0	0	0	0	0	0
ENSG00000242193.11	RP11-568K15.1	0	0.343846	0	0	0.311608	0	0	0	0	0	0.400444	0	0	0	0	0	0	0	0	0	0	0	0	0	0	0	0	0	0	0	0	0	0	0	0	0	0	0	0	0	0	0	0	0	0	0	0	0
ENSG00000277147.5	RP11-640M9.1	0.241694	0	0	0	0.448354	1.37675	0	0	0	1.17668	0.251606	0.998581	2.46567	0.187263	4.61734	2.50533	9.08076	0.714196	0.907191	0	0	2.71527	2.29982	0.424084	0	1.62044	2.48298	3.44143	0	0.280616	0.559112	0	0	0.94279	0.239396	1.7248	5.10848	0	0	0	0.290425	0.461283	0.285371	0	3.24468	6.88759	0	0.292993
ENSG00000237505.7	RP11-76N22.2	0	0	0	0	0.401187	0	0	0	0	0	0	0	0	0	0	0	0	0	0.291262	0	0	0	0	0	0	0	0	0	0	0	0	0.429836	0	0	0.257402	0	0	0	0	0	0	0	0	0	0	0	0	0
ENSG00000226476.3	RP11-776H12.1	0	0	0	0	0	0.256886	0	0.968237	0	0	0	0	0	0.168313	0	0	0.263939	0	2.66019	0	0	0	0	0	0	0	0.298068	0	0	0	0	0	0	0	0.784914	0.710375	0	0	0	0	0	0	0	0	0	0	0	0
ENSG00000284989.1	RP11-7O11.7	0.783271	3.78548	0.988682	0	1.07157	1.02755	0	0	1.09786	3.0499	1.47757	1.60166	0.285577	0.523889	4.78634	7.09491	2.42449	0.292181	1.13874	0.228857	1.1736	1.3794	1.21578	0.823132	0	1.18796	3.96714	0	4.49464	1.2705	0	0.850243	2.21303	1.3617	0.748903	3.96306	3.22278	1.85708	1.97503	0	0	1.38385	2.37513	1.21439	2.02846	3.07322	0.276051	3.53602
ENSG00000238042.5	RP11-815M8.1	0	0	0	0	0.623215	0	0	0.830878	0	0	0	0	0	0	0	0	0	0	0	0	0	0	0	0	0	0	0	0.26688	0	0.561233	0	0	0	0	0	0	0	0.16834	0	0.364473	0	0	1.50699	0	0	1.43539	0	0.292993
ENSG00000224081.8	RP11-86H7.1	0	0	0	0	1.78222	0.256886	0.216125	0	0.548928	0	0	0	0	0.187263	0.559125	0	0	0	0.457664	0	0	0	0	0	0	0.322986	0.496832	0	0	0.280616	0	0	0	0.261939	0	0.454332	0	0.506354	2.7689	0	0	0.384632	0.502331	1.02715	0.267894	0.367168	0.291488	0
ENSG00000255275.3	RP13-279N23.2	0.241694	0	0	0	0.849541	0	0.536854	0.553919	3.18006	0	0	0.878836	0.856731	8.15101	0	0	0.35381	0.714196	1.487	2.50189	1.52746	0	2.15517	0.798098	0	0	0	0	0.352232	0.280616	0.838668	0	0	1.3097	4.58556	0	0	0	5.58396	0.87059	0	0.192316	0	4.29584	0	0	1.41113	0
ENSG00000238164.6	RP3-395M20.8	0	0	0	0	0	0	0	0	0	0	0	0	0	0	0	0	0	0	0	0.276051	0	0	0	0	0	0	0	0	0	0	0	0	0	0	0	0	0	0	0	0	0	0	0	0	0	0	0	0
ENSG00000283683.1	RP3-454G6.2	0	0	0	0	0	0	0	0	0	0	0	0	0	0	0	0	0	0	0	0	0	0	0	0	0	0	0	0	0	0.229511	0	0	0	0	0.239396	0	0	0	0	0	0	0	0	0	0	0	0	0
ENSG00000255835.1	RP4-559A3.7	0	0	0	0	0	0	0	0	0.281873	0	0	0	0	0	0	0	0	0	0	0	0.262044	0.170444	0	0	0	0	0	0	0	0	0	0	0	0	0	0.227166	0	0	1.135	0	0	0	0	0.513576	0	0.189599	0	0
ENSG00000230498.1	RP4-564M11.2	0	0	0	0	0	0	0	0	0	0	0	0.24094	0	0	0	0	0	0	0	0	0	0	0	0	0	0	0	0	0	0	0	0	0	0	0	0	0	0	0	0	0	0	0	0.384392	0	0	0	0
ENSG00000227733.9	RP4-565E6.1	0	0	0	0	0	0	0	0	0	0	0	0	0	0	0.483172	0	0	0	0	0	0	0	0	0	0	0	0	0	0	0	0	0.252936	0	0	0	0	0	0	0	0.364473	0	0	0	0	0	0.189599	0	0
ENSG00000230817.5	RP4-601K24.1	0	0	0	0	0	0	0	0	0	0	0	0	0	0	0	0	0	0	0	0	0	0	0	0	0	0	0	0	0	0	0	0	0	0	0	0	0	0	0	0	0	0	0	0	0	0	0	0
ENSG00000282057.1	RP4-621F18.2	0	0	0	0	0	0	0	0	0	0	0	0	0	0	0	0	0	0	0	0	0	0	0	0	0	0	0	0	0	0	0	0	0	0	0	0	0.292743	0	0	0	0	0	0	0	0	0	0	0
ENSG00000277726.4	RP4-635E18.9	0	0	0	0	0	0	0	0	0	0	0	0	0	0	0	0	0	0	0.743501	0.276051	0	0	0	0	0	0	0	0	0	0	0	0	0	0	0	0	0	0	0	0	0	0	0	0	1.61421	0	0	0.34481
ENSG00000225087.1	RP4-660H19.1	0	0	0	0	0	0.217621	0	0	0	0	0	0	0	0	0	0	0	0	0	0	0	0	0	0	0	0	0	0	0	0	0	0	0	0	0.239396	0	0	0	0	0	0	0	0	0	0	0	0	0
ENSG00000283761.1	RP4-714D9.5	1.28874	1.03154	2.69237	4.36943	3.0775	1.89053	0.320729	1.65727	2.02025	2.3723	1.47757	0.878836	0.905678	0.355576	0.483172	0.605658	1.51905	0.292181	2.69359	1.79141	3.19018	0.340888	1.54728	0.691177	0.583509	0.432484	0.891116	2.10703	0.561837	1.63259	0.279556	1.41126	0	3.64572	0	1.1247	0.267418	0.183442	1.73633	1.74118	0.56328	0.816111	0	0.350407	0	1.27747	1.20433	1.94942
ENSG00000223745.7	RP4-717I23.3	0.483388	0.306634	0.494341	1.27775	0.896708	0	0	0	0	0	2.1189	1.52365	0	1.68204	2.64372	0.955627	1.95706	0.584363	0.22612	0.457715	0.262044	0	0.310838	2.09538	1.27621	0	0.297039	0.353169	2.24732	0	0	0.298654	0	0	0.957586	2.13112	0.292743	0.535223	5.13428	0.364473	0	0.556353	0	2.13642	3.10346	1.86592	0	0
ENSG00000232453.6	RP4-794H19.1	0	0	0	0	0	0	0	0	0	0	0	0.318948	0	0	0	0	0	0	0	0	0	0	0	0	0	0	0	0	0	0	0	0	0	0	0	0	0	0	0	0	0	0	0	0	0	0	0	0
ENSG00000237352.3	RP4-794H19.4	0	0	0	0	0	0	0	0.276959	0	0	0	0	0	0	0	0	0	0	0	0	0	0	0	0	0	0	0	0	0	0	0	0	0	0	0	0	0	0	0	0	0	0	0	0	0	0	0	0
ENSG00000254154.8	RP4-798P15.3	0.263777	0	0	0	0	0	0	0	0	0	0	0	0	0	0	0	0	0	0	0	0	0.187335	0	0	0	0	0	0	0	0	0	0	0	0	0	0	0	0	0	0	0	0	0	0	0	0	0	0
ENSG00000186056.9	RP5-1166H10.2	0	0	0	0	0	0	0.255961	0	0	0	0	0	0	0	0	0	0	0	0	0	0	0	0	0	0	0	0	0	0	0	0	0	0	0	0	0	0	0	0	0	0	0	0	0	0.412543	0	0	0
ENSG00000231346.5	RP5-836N10.1	0	0	0	0	0	0	0	0	0	0	0	0	0	0	0	0	0	0	0	0.228857	0	0	0	0	0	0	0	0	0	0	0	0	0	0	0	0	0	0	0	0	0	0	0	0	0	0	0	0
ENSG00000227533.5	RP5-848E13.3	0	0	0.494341	0	0.448354	0	0	0	0	0	0	0	0	0.168313	0	0	0	0	0	0	0	0	0	0.292128	0	0	0	0	0	0	0	0.298654	0	0.261939	0	0	0	0	0.567498	0	0.580849	0	0	0	0	0	0	0
ENSG00000143674.10	RP5-862P8.2	2.35787	14.2276	0	2.41857	13.2565	1.12737	0.969104	0	2.21187	0	0	1.27579	9.23927	3.13892	4.52514	1.57286	2.29693	15.7774	10.3457	0.252769	3.73175	2.6646	2.97748	0.424084	0	0.468839	0.496832	0	1.54286	2.41806	0.559112	5.9283	0.721503	4.74043	2.2626	7.04319	1.27488	6.29077	0.719152	0.506118	4.92212	1.98842	0.4682	4.71422	2.6892	4.00317	0.276051	2.79459
ENSG00000273637.1	RP5-864K19.7	0	0	0	0	0	0	0	0	0	0	0	0.438693	0	0	0	0.291251	0	0	0	0	0	0	0	0	0	0	0	0	0.704464	0	0	0	0	0	0	0	0	0	0.344189	0	0	0.192316	0	0	0.535787	0.189599	0	0
ENSG00000236810.5	RP5-886K2.3	0	0	0	0	0	0.435243	0	0	0	0	0.400444	0	0	0	0	0	0.273746	0	0.452239	0	0	0.187335	0	0	0	0	0	0	0	0.280616	0.547682	0	0	0.188509	0	0	0	0	0	0	0	0	0	0	0.269605	0	0.276051	0
ENSG00000283580.2	RP5-994D16.12	0	0	0	0	0	0	0	0	0	0	0	0	0	0	0	0	0	0	0	0	0	0	0	0	0	0	0	0	0	0	0	0	0	0.188509	0	0	0	0	0	0	0	0	0	0	0	0	0	0
ENSG00000117748.9	RPA2	0.263777	0.957114	0	0	0	0	0.832651	1.24295	0	0	0	0	0	0	0.241586	0	0.617749	0	0.228832	0	0.958564	0.417141	0	0.399049	0	0.322986	0	0	0	0	0	0	0	0.188509	0.257402	0.355187	1.77283	0.33668	1.94425	0.364473	0	0.192316	0	0	2.82872	0	0.329864	0.310998
ENSG00000122484.8	RPAP2	3.8522	9.39066	3.19567	8.27113	12.7662	7.86909	3.24294	1.70404	14.1388	1.67577	3.03328	3.59737	6.80781	9.70317	17.2547	8.01043	8.66082	16.9178	22.106	5.46213	9.85634	3.26143	8.84892	10.3295	2.55243	1.29195	11.9033	3.467	16.0748	5.24114	3.90235	9.6031	2.63698	3.7974	12.2165	5.20812	6.72936	5.67427	21.6158	6.35474	6.60738	8.07234	6.95294	5.07878	11.7445	12.846	2.59209	13.6438
ENSG00000117133.10	RPF1	0	0	0	0	0	0	0	0	0	0	0	0	0	0	0	0	0	0.620888	0	0	0	0	0	0	0	0	0	0	0	0	0	0	0	0	0	0.355187	0	0	0	0	0	0	0	0	0	0	0	0
ENSG00000142676.13	RPL11	0	0	0	0	0	0	0	0	0	0	0	0	0	0	0	0	0.35381	0	0	0	0	0	0	0	0	0	0	0	0	0	0	0	0	0	0	0.216034	0	0	0	0	0.886738	0	0	0	0.267894	0	0	0
ENSG00000116251.9	RPL22	0.798342	0.406923	0.406021	0	0	0.217621	0	0	0	0	0.825518	0.24094	0	0	0.241586	0	0	0	0	0.276051	0	0	0	0	0	0	0	0.620049	0	0	0	0.429836	0.451851	0	0	0	1.095	0	0	0	0.290425	0	0	0	0.808815	0.170753	0	0.34481
ENSG00000122406.13	RPL5	0	0	0	0	0	0	0	0	0.281873	0	0.286956	0	0	0	0.316699	0	0	0	0	0	0	0	0	0	0	0	0	0	0.914069	0	0.279556	0	0	0	0.257402	0.681498	0	0	0.344189	0.364473	0	0	0	0	0.269605	0.360353	0	0
ENSG00000163125.15	RPRD2	1.25264	1.30096	0.326655	0.673104	1.38533	3.24931	0.792815	2.02328	0.876596	1.09477	1.79987	2.56397	13.0022	1.60791	6.44494	1.21132	8.98108	3.21801	19.3744	1.74421	2.2491	4.58147	2.13451	0.798098	2.66162	2.84475	1.38898	3.37827	5.19913	1.9494	2.7727	2.97459	3.09362	4.06415	1.31243	0.937541	3.51553	3.73768	1.83876	0.728946	0.733794	0.961579	1.97534	1.21439	4.46604	8.24486	1.13508	1.20798
ENSG00000177954.12	RPS27	0	0	0	0	0.224177	0	0	0	0	0	0	0	0	0	0	0	0	0	0	0	0	0	0	0	0	0	0	0	0	0	0	0	0	0	0	0	0	0	0	0	0	0	0	0	0	0	0	0
ENSG00000117676.13	RPS6KA1	0	0	0	0	0	0.217621	0	0	0	0	0	0	0	0.355576	0	0.635017	0.35381	0.422015	0.228832	0	0	0	0	0	0	0	0	0	0	0.250246	0	0	0	0.188509	0.514804	0	0.267418	0	0.344189	0	0	0	0	0	0	0.170753	0	0
ENSG00000136643.11	RPS6KC1	5.92422	6.48769	4.23709	8.40805	15.5342	4.74265	3.71503	4.41859	9.99617	5.69022	5.95306	4.91635	2.73984	6.74874	4.07615	10.2716	9.50328	9.86091	12.5789	0.986536	18.6194	9.20325	7.96463	8.09217	5.32325	2.30277	13.3969	6.69827	13.5633	13.3816	3.59994	6.86998	6.632	6.58363	3.07293	9.03864	3.91218	4.37862	39.944	5.15745	3.28612	5.93627	6.50849	5.30676	10.8322	12.7198	1.73349	12.5238
ENSG00000142937.11	RPS8	0	0	0	0	0	0.217621	0	0	0	0	0	0	0	0	0	0.291251	0.35381	0	0	0	0	0	0	0	0	0	0.297039	0.26688	0	0	0	0	0	0	0	0	0	0	0	0	0	0	0	0.700813	0.808815	0	0	0.310998
ENSG00000116954.7	RRAGC	0.270788	0	0	0	0	0	0	0	0	0	0	0	0	0	0	0	0.273746	0	0	0	0	0	0	0	0	0.432484	0	0	0	0	0	0	0	0	0	0	0	0	0	0	0.443369	0	0	0	0	0	0	0
ENSG00000143303.11	RRNAD1	0	0	0	0	0	0	0	0	0	0	0.400444	0	0	0	0	0.332188	0	0	0	0	0	0	0	0	0	0	0	0	0	0	0	0	0	0	0	0	0	0	0	0	0	0	0	0	0	0	0	0
ENSG00000067533.5	RRP15	0	0	0	0.604644	0	0	0.216125	0	0	0	0	0	0	0	0.241586	0	0.263939	0	0	0	0	0	0	0	0	0	0	0.353169	0	0	0	0	0	0	0	0	0.267418	0	0	0	0	0.268967	0.570742	0	0	0	0	0
ENSG00000081019.13	RSBN1	0	1.42711	0	0	0	0.435243	0.216125	0	0.267055	0	0	0.318948	0.285577	0	0	0	0	0.422015	0.22612	0.481627	0	0.246697	0.276394	0	0	0	0	0	0.649888	0.250246	0	0	0	0.188509	0	0.227166	1.75646	0.338014	0	0	0	0.278177	0.285371	0	1.48925	0	0.276051	0
ENSG00000117616.17	RSRP1	0	0	0	0	0	0	0	0	0	0	0	0	0	0	0	0	0.35381	0	0	0	0	0	0	0	0	0	0	0	0	0	0	0	0	0	0	1.77594	0	0	0	0	0	0.192316	0	0	0.412543	0	0	0
ENSG00000137996.12	RTCA	0.263777	0	0	0	0	0.217621	0	0	0	0	0	0.24094	0	0.168313	0	0	0	0	0	0.252769	0	0	0	0	0	0	0	0	0	0	0	0	0	0	0	0	0	0	0	0	0.28164	0	0	0	0	0	0	0
ENSG00000020633.18	RUNX3	0	0	0	0	0	0	0	0	0	0	0	0	0	0	0	0	0	0	0	0	0	0	0	0	0	0	0	0	0	0	0	0	0	0	0	0	0	0	0	0	0	0	0	0	0.269605	0	0	0
ENSG00000160753.15	RUSC1	0	0	0	0.604644	0	0	0	0	0	0	0	0	0	0	0	0	0	0	0	0	0	0	0	0	0	0	0	0	0	0.280616	0	0	0	0	0.27011	0	0	0	0	0	0	0	0	0	0	0.189599	0	0
ENSG00000122481.16	RWDD3	0	0	0	0	0	0	0	0	0	0	0.400444	0	0	0	0	0	0	0	0	0	0	0	0	0	0	0	0	0	0	0	0	0	0.269653	0	0	0	0	0	0	0	0	0	0	0	0	0	0	0
ENSG00000198626.15	RYR2	0	0	0	0	0	0	0	0.45884	0	0	0	0	1.93206	0	0	0	0	0	0	0	0	3.67858	0	0	0	0	0	0	0	0	0	0	0	0	0	0	0	0	0	0	0	0	0	0	0	0	0	0
ENSG00000197747.8	S100A10	0	0	0	0	0	0	0.511922	0	0	0	0	0	0	0	0	0	0	0	0	0	0	0	0	0	0	0	0	0	0	0	0	0	0	0	0	0	0	0	0	0	0	0	0	0	0	0	0	0
ENSG00000189334.8	S100A14	0	0	0	0	0	0	0	0.691278	0	0	0	0	0	0.168313	2.14262	0	0.70762	0	0.977758	0	0	0	0.939387	0	0	0	0	0	0	0	0	0	0	0	0	0	0	0	0	0	0.443369	0	0	0	0	0	0	0
ENSG00000197956.9	S100A6	0	0	0	0	0	0.217621	0	0	0	0	0	0	0	0	0	0	0	0	0	0	0	0	0	0	0	0	0	0	0	0	0	0	0	0	0	0	0	0	0	0	0	0	0	0	0	0	0	0
ENSG00000163220.10	S100A9	0	0	0	0	0	0	0	0	0	0	0	0	0	0	0	0	0	0	0	0	0	0	0.662992	0	0	0	0	0	0	0	0	0	0	0	0	0	0	0	0	0	0	0	0	0	0	0	0	0
ENSG00000116497.17	S100PBP	1.79421	1.5274	0	0.604644	1.24858	1.21219	0.216125	0	0.281873	2.30507	2.45937	0.877386	0.345927	0.897307	1.28304	0.291251	1.2355	1.59074	4.31088	0.505539	0	0.340888	1.16068	0.848167	0	1.07846	0.298068	0.533761	1.40893	2.03087	0.559112	2.018	2.03812	0.864304	0	1.75053	2.77135	0	2.36538	0.364473	0.290425	0.537934	0	1.15318	2.29464	1.26464	0.329864	0
ENSG00000187634.11	SAMD11	0	0.343846	0	0	0	0	0	1.7961	0.84562	0	0	0.438693	0.631504	0	0	0	0.70762	0	0.748926	0	0.496763	0.562004	0	1.72455	0	0	1.78753	0	0	0	0	0.682772	0	0	0	0	0.878229	0	0	0	0	0	0.787702	0	0.412543	0.935966	0	0
ENSG00000031698.12	SARS	0	0	0.326655	0	0.224177	0	0	0.22942	0	0.629299	0.251606	1.2047	0.620102	1.10241	0.558285	0	0	0.913069	0	0.686572	0.262044	0.340888	0.587232	0	0.583509	0.322986	0	0.176584	0	2.12345	0	0	0.341285	1.81191	0.988299	0	0.852904	0.676028	0.927074	0.506118	1.14413	0.192316	0.570742	0	2.41104	0.879427	0.329864	0
ENSG00000156876.9	SASS6	1.25965	0	0.653311	0	0.625364	1.37675	0.89742	0	0	0	0.503213	0.637895	0.691854	0.186709	0.724757	0.291251	2.57481	0.422015	1.20117	1.03373	0.714001	0.187335	0.621676	0.292128	0.583509	0.468839	0.595107	0.504184	0.352232	0.811479	0	0.429836	0.269653	0	0.718189	0.227166	0	0.704898	1.95964	0.87059	0.28164	0.470492	1.50699	2.0543	2.44272	0.189599	0.605915	0
ENSG00000116521.10	SCAMP3	0	0	0	0	0	0	0	0	0	0	0	0	0	0	0	0	0	0	0	0	0	0	0	0	0	0	0	0	0	0	0	0	0	0	0	0.355187	0	0	0	0	0	0	0	0	0	0	0	0
ENSG00000143653.9	SCCPDH	0.270788	1.30096	0	0.673104	2.1877	0	0	0.22942	0.281873	0.581	0.251606	0	0	0	1.359	5.15512	1.40957	0.422015	0	0	0	0.604476	3.30897	3.66613	0	0	0.298068	0	1.2452	0.530862	0.547682	0	0.451851	0.340425	0	1.11357	0	0.718665	1.03257	0	0.290425	5.25287	0.787702	0.384392	0.269605	3.37703	0.552102	0.621996
ENSG00000010803.16	SCMH1	6.27633	8.4821	4.26371	5.04253	10.4417	8.44517	7.62018	5.66154	15.8377	6.17037	8.97562	12.667	5.68354	11.3128	11.2458	17.1449	14.9659	9.07367	27.4641	1.03373	11.8524	6.97589	8.43386	7.72812	5.21405	4.35526	25.6068	6.05108	12.2722	13.6207	3.87949	9.85652	4.05687	11.9628	4.12795	10.7836	8.29438	16.9788	17.5959	5.58238	7.73394	23.5734	9.80814	12.8812	6.08538	14.5287	3.85022	6.72943
ENSG00000163156.11	SCNM1	2.4902	3.21519	0.494341	0.673104	2.40973	2.33206	1.60365	1.981	2.72982	3.5343	3.32023	1.7214	2.05939	0.859961	5.1944	5.27793	9.99032	3.44115	7.58428	0.804872	3.01775	3.81629	1.91322	1.27225	0	1.4378	1.19021	1.8953	3.24944	2.57284	2.74984	1.35611	2.35629	3.92283	3.09835	2.216	1.83504	2.37586	6.02047	1.23506	2.4412	1.23055	1.50714	4.38788	4.43779	3.64883	2.98369	1.8976
ENSG00000116171.17	SCP2	0	0	1.30638	0.673104	0.311608	0.217621	0	0	0	0.581	0	0.24094	0.620102	0.523335	0.633398	0.302829	0.971559	0	0.291262	0.504909	0	0	0	1.09023	0	0	0.596137	0.26688	2.73348	0.688534	0	0.682772	0.495578	0	0	0	0	0.843034	1.83876	0	0.290425	0.470492	1.50699	0.700813	0	0.189599	0.329864	0.310998
ENSG00000000457.13	SCYL3	0	0	0.326655	0	0	0.388474	0	0	0	0	0	0	0	0.186709	0	0.623439	0	0	0.904479	0	0.731482	0.511333	0	0.399049	0	0	0	0	0	0	0	0.298654	0	0.638958	0	0	0	0	0.344189	0	0	0.192316	0.285371	0.513576	0.267894	0.183584	0.276051	0
ENSG00000054282.15	SDCCAG8	2.1302	6.58797	4.26371	5.17945	32.9017	5.46147	10.9948	9.29602	7.31925	9.36516	10.7261	5.03609	8.70089	4.41353	9.84844	16.9564	4.27773	21.5034	9.60118	7.14298	3.01775	7.7677	29.1444	4.64943	1.96892	2.8811	7.44259	5.415	8.73383	5.13311	11.108	9.13149	8.86315	8.29707	5.60987	8.76661	10.6438	17.4194	16.4486	5.11967	4.93301	9.89115	13.952	14.0015	4.58586	13.2761	5.03161	13.3869
ENSG00000143751.9	SDE2	0.541577	0.406923	0	0	0	0.217621	0	0	0.281873	0	0	0	0.285577	0	0	0.623439	0.273746	0.913069	0	0	0	0.187335	0	0	0	0	0	0	0	0	0	0.298654	0	0	0	0.681498	0.267418	0	0.344189	0	0	0.192316	0	0	0	1.26544	0.276051	0
ENSG00000078808.16	SDF4	11.5727	3.06634	8.50057	6.05794	19.0934	6.42549	3.8695	5.29321	10.66	4.7446	1.25803	8.51227	5.73726	15.4242	5.84656	4.88703	12.3208	15.607	10.3194	27.7658	8.70922	9.52016	11.9702	14.4693	0	4.75733	26.4959	12.1509	9.88228	3.2961	10.2521	0	8.12582	22.2913	2.36745	8.43055	13.6777	9.7997	18.7208	0	9.45224	8.84589	2.8092	15.9606	28.6244	13.0236	10.8141	13.6168
ENSG00000117118.9	SDHB	1.69186	0.343846	0.653311	0	0.311608	0.474508	0	0	0	1.2103	1.55571	0.438693	0	0.859961	0.316699	0	0.527878	0	0.457664	0	0.469438	0	0	0.292128	0	0	1.09194	0.176584	0	0	0.559112	0.252936	0	0	0	0.432068	0	0	0.344189	0.364473	0.290425	0	0	0	0.53921	0.71469	0.329864	0.637803
ENSG00000143252.14	SDHC	0.505471	0.713557	0	0	0.623215	0.770659	0	0	1.12883	0	0	0.318948	0.620102	1.27294	0.316699	0.302829	0	0.84403	0.457664	0	0.704157	0.545114	0.331496	2.14864	0	0.468839	1.09194	0.831783	0.297656	0	0	0	1.44301	0.450448	0	0.216034	2.12779	0.183442	0	9.25925	0.28164	0	0	0	0.94833	0.701859	0	0.621996
ENSG00000265808.3	SEC22B	0	0	0	0	0	0	0	0	0	0	0	0	0	0	0	0.291251	0	0	0	0	0	0	0	0	0	0	0	0	0	0	0	0	0	0	0	0	0	0.16834	0	0.728946	0	0	0	0	0.269605	0	0	0
ENSG00000143416.20	SELENBP1	0	0.919902	0	0	0	0	0	0	0	0	0	0	0	0	0	0	0	0	0	0	0	0	0	0	0	0	0	0	0	0	0	0	0	0.377018	0	0	0	0	0	0	0	0	0	0	0	0	0	0
ENSG00000196189.12	SEMA4A	0	0	0	0	0	0	0	0	0	0	0	0	0	0	0	0	0	0	0	0	0	0	0	0	0	0	0	0	0	0	0	0	0	0	0	0	0	0	0	0	0	0	0	0	0.269605	0.170753	0	0
ENSG00000143434.15	SEMA6C	0	0	0	0	0	0	0	0	0.861778	0	0	0.24094	0	0	0	0	0	0	0	0	0	0	0	0	0	0	0	0	0	0	0	0	0.341285	0	0.239396	0	0	0	0	0	0	0	0	0	0.267894	0.189599	0	0
ENSG00000183291.15	SEP15	0	0	0	0	0	0	0	0	0	0	0	0	0	0	0	0	0	0	0	0	0	0	0	0	0	0	0	0	0	0	0	0	0	0	0	0	0	0	0	0	0	0	0	0	0	0	0	0
ENSG00000162430.16	SEPN1	0.805354	0.687692	0	0	0	0.256886	0	0.553919	0	0	0	0	0	0.186709	0	0	0	0	0	0	0	0.187335	0	0	0.583509	0	0.297039	0	0	0	0	0.252936	0	0.188509	0.27011	0	0	0	0	0	0	0	0	0	0.269605	0.379199	0	0
ENSG00000142864.14	SERBP1	0.263777	0	0	0	1.02655	0.513773	0	0	0	0	0.6874	1.75622	0	0	0	0	0	0	0.228832	0.252769	0	0	0	1.19715	0.692705	0	0	0	0	0.229511	0	0	0	0	0	0.787255	0	0.338014	0.359576	0	0	0.470492	0.4682	0.384392	0.53921	0.52509	0.329864	0
ENSG00000168528.11	SERINC2	0	0.306634	0	0	0.712794	0	1.21815	0.735799	0.281873	0	0	0.24094	0	2.01978	0.316699	0.332188	0	0.292181	1.78911	0	0.234719	0	0.331496	0	0	0.937678	0	0	0	0.781108	0	0	0	1.27792	0.736195	0	0	1.08555	0.359576	1.01224	0	1.65064	0	0.768784	0	0.72752	0.567539	0
ENSG00000130766.4	SESN2	0.263777	0.343846	0.406021	0	0.401187	0.256886	0	0	0	0	0.251606	0.24094	0	0.542285	0	0.291251	0	0	0	0	0	0.170444	0	0	0	0	0	0	0	0.280616	0.559112	0.252936	0	0.188509	0	0	0	0.183442	0	0	0.871274	0	0.285371	0	0	0.170753	0.276051	0
ENSG00000143379.12	SETDB1	1.5746	0.613268	0.326655	0.604644	1.33816	3.16328	0.864499	0	2.21187	0.581	2.87372	2.91919	4.16109	2.00305	2.64204	2.12601	9.29405	0.714196	16.8174	0.252769	2.18681	2.86987	1.74791	0.876384	1.16702	2.08928	0.894205	2.54492	7.43405	2.77051	1.37492	2.52387	2.73651	2.29414	0.496798	3.27043	1.095	2.64725	3.74213	2.02447	1.1617	3.31267	1.82664	1.76195	2.41618	2.52928	0.935778	0.292993
ENSG00000183431.11	SF3A3	0.263777	0	0	0	0	0.256886	0.255961	0.414318	0.53411	0.629299	0.400444	0.24094	0	0	0.241586	1.57286	0	0.292181	0.22612	0	0.262044	0.170444	0.331496	1.56438	0.692705	0.468839	0.298068	0.176584	0.914069	0.229511	0.559112	0.804525	0	0	0.496798	0.216034	0.447303	0.520122	0	0.364473	0.862489	0.461283	0	0.897968	0.94833	1.26544	0.276051	0
ENSG00000116560.10	SFPQ	0	0	0	0	0.712794	0.823717	0.216125	0	0	0	0	1.63503	0	0.374527	0	0	0.273746	0.422015	1.60182	0.78096	0	0.170444	0.276394	0.292128	0	0	1.39104	0.504184	0.297656	1.01062	0.559112	1.02714	0.341285	0.188509	1.04232	1.363	0.267418	0.183442	2.16756	0	0.725009	0.278177	0	2.65992	4.17503	0.341506	0.567539	0.292993
ENSG00000213064.9	SFT2D2	0	0	0	0	0.535785	0.217621	0	0.45884	0.281873	0	0.538562	0	0	0.168313	0	0.635017	0.273746	0	0	0	0.786132	0.545114	0	0.292128	0.692705	0	0	1.36154	0.859493	0	0	0	0	1.05787	0	0.227166	0.534836	0	0	0	0	0	0.4682	0.734799	1.3643	0.556767	0	0
ENSG00000118473.21	SGIP1	0	0	0	0	0	0.731394	0	0	0	0.547384	0	0	1.88311	0	0	0	0	0	0	0	0	0	0	0	0	0	0	0	0	0	0	0	0	0	0	0	0	0.16834	0.719152	0	0	0	0	0	0	0	0	0
ENSG00000175137.10	SH3BP5L	0	0	0	0	0	0	0	0	0	0	0.251606	0	0	0	0	0	0	0	0	0	0	0	0	0	0	0	0	0	0	0	0	0	0	0	0	0	0	0	0	0	0	0	0	0	0	0	0	0
ENSG00000214193.10	SH3D21	0	0	0	0	0	0	0	0	0	0	0	0	0	0.168313	0	0	0	0	0	0	0	0	0	0	0	0	0	0	0.297656	0	0	0	0	0	0	0	0	0	0	0	0	0	0	0	0	0	0	0
ENSG00000097033.14	SH3GLB1	0	0.406923	0.494341	0.604644	0.847392	1.12737	1.00894	0.276959	1.35009	1.75768	1.44222	1.39554	1.32336	2.65513	3.18408	3.12877	1.7928	1.66379	5.9434	2.63573	2.06903	0.493394	4.31725	2.94355	0.583509	3.05824	2.97878	1.12423	2.95178	5.27679	0.279556	1.51761	1.75639	1.20473	1.27641	0.809519	6.01946	1.73137	1.76711	1.45789	0.84492	1.20074	0.9364	5.87163	1.36087	3.47127	1.64932	5.60498
ENSG00000160691.18	SHC1	0	0.406923	0	0	0	0.217621	0	0	0	0	0	0.24094	0.345927	0.542285	0	0.605658	0.35381	0.292181	0.228832	0.276051	0	0.868064	0	0	0	0	0.496832	0	0.297656	0	0	0	0	0.188509	0.797622	0	0	0	0	0	0.580849	0	0	0.513576	2.1714	0.170753	0.276051	0
ENSG00000157060.15	SHCBP1L	0	0	0	0	0	0	0	0	0	0	0	0	0	0	0	0	0	0	0	0	0	0	0	0	0	0	0	0	0	0	0	0	0	0	0	0	0	0	0	0	0	0	0	1.9152	0	0	0.291488	0
ENSG00000116991.10	SIPA1L2	0	3.67942	1.14765	0	0	3.47862	0.216125	0.553919	0.876596	2.22315	0	0	0.856731	1.42009	0.559125	6.0126	1.3295	2.8893	14.3535	2.06872	1.49029	3.19178	0.953173	0	0.583509	0.322986	2.58125	1.03394	0.561837	4.15868	0	5.70222	0	1.91687	0.748903	4.99522	2.32405	2.57441	0.703765	1.88283	1.1617	1.62439	0.570742	0.513576	0.537499	2.9161	0	2.17479
ENSG00000157933.9	SKI	0.270788	0.306634	0	0	0	0.256886	0	0	0	0	0.251606	0.481881	0	0.746836	0	0	0	0.292181	0.291262	0	1.00337	0	0	0.983305	0	0	2.08663	0	1.77356	0.841849	0	0.859673	0	0.450448	0	1.21932	0.534836	0.366884	0.927074	0.364473	0	0.278177	0.502331	0	0	0	0	0
ENSG00000242267.6	SKINT1L	0	0	0	0	0	0	0	0	0	0	0	0	0	0	0	0	0	0	0	0	0	0	0	0	0	0	0	0	0	0	0	0	0	0	0	0	0	0	0	0	0	0	0	0	0	0	0	0
ENSG00000155380.11	SLC16A1	0.791331	0	0	0	0.535785	0.217621	0	0	1.37973	0.547384	0.503213	0	0	0	0.241586	0.291251	0.537685	0	0.291262	0.228857	1.04818	0	0	0	0	0	0	0	0.947544	0	0	0	0.451851	0	0.27011	0.454332	0	0.183442	0.719152	0	0	0.268967	0	1.21439	2.42131	0	0	1.03443
ENSG00000168679.17	SLC16A4	0	0	0	0	0	0	0	0	0	0	0	0	0	0	0.559125	0.664375	0.263939	0	0	0	0	0	0	0	0	0	0	0	0	0	0	0	0	0	0	0	0	0	0	0	0	0	0	0	0	0	0	0
ENSG00000117479.13	SLC19A2	0	0	0	0	0.401187	0.474508	0	0.22942	0	0.629299	0	0.318948	0.285577	0	0	0	0.263939	0	0.228832	0.228857	0	1.11476	0.331496	0	0	0	0.595107	0	0	0	0	0.252936	0	0.717444	0.239396	1.86395	0	0	0	0	0	0	0	0	1.07157	0.683013	0	0
ENSG00000163393.12	SLC22A15	0	0.343846	0	0	0.448354	0	0	0	0	0	0	0.24094	0.620102	0	0.966343	0.302829	0	0	0.228832	0	0	0	0.276394	0	0	0.468839	0	0	0	0.500492	0.279556	0.252936	0	0.450448	0.27011	0.216034	1.92739	0.843034	0	0	0	0	0	0	0	0.354337	0.329864	0
ENSG00000085491.15	SLC25A24	0.270788	3.03471	3.43376	4.36943	8.95518	5.99532	2.33861	2.02328	7.93858	1.09477	0	8.75611	1.8603	1.47694	4.31773	3.44855	2.221	2.08581	5.8981	0.986536	2.84616	1.62714	2.80442	0.691177	0.692705	1.62044	5.65624	1.48698	3.45904	1.78063	2.21359	2.51444	1.63	0.261939	3.2276	1.7248	3.36579	3.64619	7.92867	2.55131	1.13534	3.65045	1.00466	3.89837	3.92341	2.60467	1.57257	1.37924
ENSG00000171612.6	SLC25A33	0.241694	0	0	0	0	0.217621	0.255961	0	0.281873	0	0	0	0	0	0	0	0	0.620888	0	0	0	0.374669	0	0.424084	0	0	0	0	0.297656	0	0	0	0.225925	0	0	0	0	0	0.359576	0	0	0.268967	0	0.384392	0.269605	0.367168	0	0
ENSG00000160785.13	SLC25A44	0	0	0.494341	0	0.759961	0	0	0	0.267055	0	0	0.24094	0	0.187263	0.316699	0	0	0.422015	0.686496	0	0	1.20895	0	0.716212	0	0	0.297039	0.533761	0	0	1.39778	0	0	0.602365	0	0.227166	0	0.16834	0.344189	0	0	0	0	0.863982	1.88039	0.885443	0.329864	0.34481
ENSG00000174502.18	SLC26A9	0	0	0	0	0	0	0	0	0	0	0	0	0	0	0	0	0	0	0	0	0	0	0	0	0	0	0	0	0	0	0	0	0	0	0	0	0	0	0	0	0.871274	0	0	0	0	0	0	0
ENSG00000143554.13	SLC27A3	0	0	0	0	0	0	0.216125	0	0	0	0	0	0	0	0	0	0	0	0	0	0	0	0	0	0	0	0	0	0	0	0	0	0	0	0	0	0	0	0	0	0	0	0	0	0	0	0	0.34481
ENSG00000117394.21	SLC2A1	0	0	0	0	0	0	0.432249	0	0	0	0	0.24094	0.571154	0.355576	0	0.332188	0.273746	0.422015	0	0.252769	0.262044	0	0.642334	0	0	0	0	0	0	0	0	0	0	0	0	0.227166	0	0	0.344189	0	0	0	0	0	0	0.183584	0	0
ENSG00000142583.17	SLC2A5	0	0	0	0	0	0	0	0	0	0	0	0	0	0	0	0	0	0	0	0	0	0	0	0	0	0	0	0	0	0	0	0	0.269653	0	0	0	0	0	0	0	0	0	0	0	0	0	0	0
ENSG00000196660.10	SLC30A10	0	0	0	0	0	0	0	0	0	0	0	0	0	0	0	0	0	0	0	0	0	0	0	0	0	0	0	0	0	0	0	0	0	0	0	0	0	0	0	0	0	0	0	0	0	0	0	0
ENSG00000162695.11	SLC30A7	1.03303	1.56461	5.13745	3.29706	6.01872	4.70581	1.43427	1.51914	2.22669	2.3723	1.61569	1.31753	3.54099	1.25233	5.11592	0.59408	1.78299	0.913069	4.24845	0.252769	2.87349	1.05645	4.10287	1.6713	0	0	3.37306	1.03394	6.84241	4.00101	1.39778	1.60905	1.07861	3.46203	1.81663	1.54563	4.41013	0.535223	10.0369	0	3.76463	1.9608	0.570742	1.15318	1.61592	2.30279	1.18889	0.982613
ENSG00000117620.14	SLC35A3	1.35394	0.750769	0	0.673104	1.86965	1.60188	0	0	0	1.12838	0	0.800829	0	0.168313	0.950096	0.623439	1.96687	1.29856	9.92961	0.481627	2.70105	0	1.14002	2.36566	0	0	1.09297	1.75386	0.859493	0.250246	2.47028	2.26151	1.17815	0.717444	0.509506	0.4432	0.292743	1.20858	5.75804	0.364473	2.29704	0.461283	0.285371	0.734799	0.53921	2.58662	0.659727	1.8976
ENSG00000116704.7	SLC35D1	0	0	0	0	0	0	0	0	0	0	0	0	0	0	0	0	0	0	0	0	0	0	0	0	0	0	0	0	0	0	0	0	0	0	0	0	0	0	0.344189	0	0	0	0	0	0	0	0	0
ENSG00000215790.7	SLC35E2	0.791331	0.343846	0.326655	0	0	0	0.216125	0	0	0	0	0	0	0	0.316699	1.25846	0	0.584363	0.457664	0.276051	0	0.545114	0	0	0	0.432484	0	0.504184	0	0	0	0	0	0	0	0	0	0.183442	0	0	0	0	0	0	0	0	0	0
ENSG00000189339.11	SLC35E2B	0.263777	0.750769	0	0	0	0	0	0	0.548928	0	0	0.318948	0	0	0.241586	1.29939	0	0.422015	0	0	0	0.340888	0.276394	0	0	0	0	0	0	0.280616	0	0	0.225925	0	0	0	0	0	0.703765	0	0	0.192316	0.4682	0	0	0	0	0
ENSG00000183780.12	SLC35F3	0	0	0	0	0	0	0	0.276959	0	0	0	0	0	0	0.559125	0	0	0	0	0	0	0	0.276394	0	0	0	0	0	0	0	0	0	0	0	0	0	0	0	0	0	0	0	0	0	0.269605	0	0	0
ENSG00000143570.17	SLC39A1	0	0	0	0	0	0	0	0	0	0	0	0	0	0	0	0	0	0	0	0	0	0	0	0	0	0	0	0	0	0	0	0	0	0	0	0	0	0	0	0	0	0	0	0	0	0	0	0
ENSG00000133065.10	SLC41A1	0	0	0	0	0	0	0	0	0	0	0	0	0	0	0	0	0	0	0	0	0	0	0	0	0	0	0	0	0	0	0	0	0	0	0	0	0	0	0	0	0	0	0	0	0	0	0	0
ENSG00000143036.16	SLC44A3	0	0	0	0	0	0	0	0	0.594723	0	0	0.318948	0	0.186709	0	0	0.263939	0.292181	0.291262	0	0.469438	0	0	0.424084	0	0.468839	0	0.176584	0	0	0.279556	0	0	0.261939	0	0	0	0	1.06334	0	0	0	0	0.350407	0	0.683013	0.291488	0
ENSG00000137968.16	SLC44A5	0	0	0	0	0	0.435243	0	0	0	0	0	0	0.620102	0	0	0.291251	0	0	1.62271	0.228857	0	0	0	0	0	0	0.297039	0.26688	0.649888	0	0	0	0	0	0.478793	0	0.447303	0	0	0	0	0	0	0	0	0.183584	0	0
ENSG00000158715.5	SLC45A3	0	0	0	0	0.623215	0.256886	0	0	0	0.547384	0	0	0.691854	0.168313	0	0	0	0	0	0	0.262044	0	0	0	0	0	0	0	0.595312	0	0	0.298654	0	0	0.514804	0	0	0	0	0.506118	0	0	0	0	0	0.537921	0	0
ENSG00000197106.6	SLC6A17	0	0	0	0	0	0	0	0	0	0	0	0	0	0	0	0	0	0	0	0	0	0	0	0	0	0	0	0	0	0	0	0	0	0	0	0.355187	0	0	0	0	0	0	0	0	0.269605	0	0	0
ENSG00000196517.11	SLC6A9	0.241694	0.994326	0	0	0	0	0	0	0	0	0	0	0	0	0	0	0	0.620888	0	0	0	0	0	0	0	0.864969	0	0	0	0	0	0	0.610937	0.340425	0	0	0	0	0.344189	0	0	0.192316	0	0.384392	0	0.360353	0	0
ENSG00000090020.10	SLC9A1	0.263777	0	0	0	0.311608	0.256886	0	0	0	0.547384	0	0.24094	0	0	0.316699	0.332188	0	0.584363	0.454952	0	1.18344	0	0	0.424084	0	0	0	0.26688	0	0.250246	0.547682	0	0.539305	0.188509	0	0	0	0	1.135	0	0	1.55557	0.285371	0.768784	0.53921	0	0	0
ENSG00000084070.11	SMAP2	0	0	0.406021	0	0	0	0.255961	0	0	0.629299	0	0.438693	0	0	0	0	0.527878	0	0	0	0	0	0	0	0.583509	0	0	0.831783	0	0.250246	0	0.298654	0.539305	0.261939	0.509506	0.710375	0	0	0	0.364473	0	0	0	0	1.88039	0.550752	0	0
ENSG00000198952.8	SMG5	0	0.65048	0	0	0.224177	1.42981	0.320729	0.643738	0	0	0.286956	0	0.285577	0	0.558285	0.332188	0.263939	0.620888	0.912616	0	0.469438	0	0	0.399049	0	0	0	0.176584	0.297656	0	1.37492	0.252936	0.836863	0.790874	0.257402	0.4432	0.292743	0.718665	0.911687	0	0.28164	0.278177	0	0.513576	0.807103	1.91678	0.621351	0
ENSG00000116698.21	SMG7	0.270788	0	0	0	0	1.37675	0.57669	0.276959	0	0	0.400444	0.318948	0	0.336626	0	0.59408	0.263939	0.913069	0.228832	0	0	0.246697	0.310838	0	0	0	0.297039	1.03794	1.0567	0.250246	0	0	0	0.900897	0.257402	0	0.292743	0.844368	0.359576	0	0	0	0.4682	0.734799	0.537499	0.746367	0	0.34481
ENSG00000203721.6	SMIM16	0	0	0	0	0	0.217621	0	0	0	0	0	0	0	0	0	0	0	0	1.58284	0	0	0	0.662992	0	0	0	0	0	0.297656	0	0.559112	0	0	0	0.54022	0.454332	0.447303	0.338014	0	0	0	0.268967	0	0.384392	0.269605	0	0.276051	0
ENSG00000130768.14	SMPDL3B	0	0	0	0	0	0	0	0	0	0	0	0	0	0	0	0	0	0.620888	0	0	0	0	0	0	0	0	0	0	0	0	0	0	0	0	0	0	0	0	0	0	0	0	0	0	0	0	0	0
ENSG00000143499.13	SMYD2	0	0	0	0	0	0	0	0	0	0	0.652051	0	0	0.168313	0	0.291251	0.263939	0	0.517381	0	0.976045	0	0.621676	0	0	0	0.496832	0.3276	0	1.25123	0	0	0.225925	0	0	0	0	0.50502	0.359576	0	0	0.576948	0	0	0	0	0	0
ENSG00000185420.18	SMYD3	1.23055	8.5597	2.77174	12.4352	14.2389	7.30855	0.255961	4.69253	8.70877	3.67919	3.95412	6.04449	4.61155	3.36628	13.0087	2.69693	2.221	10.0192	3.49952	9.8169	7.22742	13.4111	2.3558	7.17568	1.85972	2.70397	33.1527	5.33272	7.32857	5.81347	5.80209	2.89856	11.183	11.4437	1.72979	5.17472	0.292743	8.66796	27.8438	6.03367	18.2226	11.7	3.11668	4.31991	10.4992	25.9863	7.90069	1.93361
ENSG00000143740.14	SNAP47	0.270788	0.306634	1.22702	0.673104	1.82678	0.652864	0.216125	1.24295	1.39589	0	1.00643	0.481881	0.345927	0.374527	0.800711	0.955627	1.08518	0.292181	0.452239	0	1.02085	1.4567	0.863627	1.5926	0	0.791825	0.596137	0	0	0.530862	0	0	0.269653	1.61328	0.754201	0	0	0.704898	3.38256	2.79119	0.725009	0.537934	1.4046	1.08521	0.535787	0.373183	0	0.34481
ENSG00000197989.13	SNHG12	1.30381	1.32683	1.87137	2.62396	0	1.29822	0	1.79084	0.548928	0	0.939007	3.83976	0.631504	2.67353	2.06667	0.664375	1.7928	6.05453	1.82794	0.91543	3.00027	1.28625	1.63682	0.584256	3.13594	0	1.98733	0.176584	3.37099	2.18855	0.827238	1.28008	1.78429	5.42585	0.27011	1.94083	4.08051	0.16834	5.3422	3.52014	2.70527	1.68044	0.4682	8.87096	3.76591	1.25943	3.59711	0.930796
ENSG00000163877.10	SNIP1	0	0	0	0	0	0	0	0	0	0	0	0	0	0	0	0	0	0	0	0	0	0	0	0	0	0	0	0	0	0	0	0	0	0	0	0	0	0	0	0	0	0	0	0	0	0	0	0
ENSG00000060688.12	SNRNP40	0.541577	1.36404	0.326655	1.20929	0.712794	0.513773	0.792815	0	1.60233	0	0.503213	0.679634	0	1.58951	0	0	0	0	3.9599	0	0.704157	0.808701	0	1.1403	0	0.791825	0	0.26688	0.892968	0.709268	0	0	0	0	0.257402	0.432068	0.267418	0.16834	0.359576	0	0.725009	0.547144	0	1.5648	0.53921	2.03587	0.276051	0
ENSG00000143376.13	SNX27	7.25817	5.64221	3.69001	3.09168	13.7413	5.56129	4.13238	1.51914	4.97267	0.547384	3.09326	8.1893	24.469	3.79489	27.2021	7.76011	22.414	11.5897	46.9642	3.05399	9.72328	6.55609	11.1014	6.93002	6.27187	8.3461	7.93721	6.75899	9.42959	3.59745	3.34324	9.20155	5.65417	11.5171	8.86606	8.92141	11.6669	7.25595	12.9196	3.88461	7.33907	9.02253	6.49676	5.60227	13.8706	7.90054	6.28975	4.76201
ENSG00000162627.16	SNX7	0.241694	0.613268	0.494341	1.88239	2.58244	0	0.432249	1.38256	0.281873	0.547384	0.400444	0.956843	2.63531	1.30696	0	2.74324	1.14563	1.00638	1.94738	0.828154	1.98705	0	1.74791	4.61803	1.27621	0.468839	0.894205	1.05951	1.48828	1.30087	1.11822	2.12435	0	0.864304	2.09945	2.84949	3.52929	0.688462	4.00939	0.87059	1.46759	0.461283	0.4682	2.11236	0.267894	1.39169	0.567539	10.8673
ENSG00000057252.12	SOAT1	1.6037	1.84538	4.01666	2.01931	3.25927	1.73347	5.53373	0.830878	3.68319	1.8396	2.79886	3.23813	1.38371	0	0.79987	4.68385	0.617749	2.50782	0.457664	1.49144	0.94872	1.1327	0.60789	2.23052	1.38541	0.968959	2.77898	1.12423	4.7836	1.24013	0	2.32214	3.02928	2.00066	0.509506	1.38074	0.560161	1.04291	3.02298	1.23506	0	0.278177	1.07307	7.97299	0	1.09469	2.30853	2.43177
ENSG00000134243.11	SORT1	0.270788	0.306634	1.80072	0	0.802374	0.217621	0.962188	0	0	1.75768	0.400444	0	0.571154	0.917367	1.11825	0.908487	1.05576	0.422015	2.71615	0.457715	0	0.246697	0.331496	1.00834	0	0.432484	0	1.18495	0	1.16829	1.66591	0	0.341285	0.86936	0	0.670366	0.534836	0.506354	1.72094	1.23506	0.862489	1.69183	0	0.700813	0.269605	1.43539	1.15051	0
ENSG00000143842.14	SOX13	0.805354	0.343846	0	0.673104	0.224177	1.34499	1.08062	0.22942	0.267055	0	0.825518	0.757641	1.03778	2.43165	0	6.25051	33.0752	3.86717	0.683784	0.481627	6.82163	1.31134	4.86317	0.292128	1.16702	0	0.595107	0	3.16139	1.41854	1.09536	0	2.03083	0.864304	1.04973	1.21932	0	0.917209	8.0856	3.92238	0.853705	6.49262	1.22177	0.513576	2.14999	1.89112	0.329864	0.966805
ENSG00000155761.13	SPAG17	0	0	0	0	0	0	0	0	0	0	0	0	0	0	0	0	0	0	1.10262	0	0.524088	0	0	0	0	0	0	0	0	0	0	0	0.341285	0	0	0.216034	0	0.351782	0	0	0	0	0	0	0	0.170753	0	0
ENSG00000162814.10	SPATA17	0	0	0	0	0	0	0	0	0	0	0	0	0	0	0.241586	0	0	0.422015	0	0	0	0	0	0	0	0	0	0	0	0	0	0.505871	0	0	0.239396	0.648101	0	0	0	0	0	0	0	0	0	0	0	0.310998
ENSG00000185523.6	SPATA45	0	0	0	0	0	0	0	0	0	0	0	0	0	0	0	0.291251	0	0	0.291262	0	0	0	0	0	0.692705	0	0	0	0	0	0	0	0	0	0	0	0.292743	0	0	0	0	0	0	0	0	0	0	0
ENSG00000132122.11	SPATA6	6.82596	2.05173	0	0	4.10236	16.5607	0.216125	0.414318	4.34831	1.17668	5.6833	0	1.38371	1.00988	3.4265	1.75908	0	13.1357	4.25387	1.94979	3.16065	1.56778	0.994488	3.69158	0.583509	1.11481	9.6256	0.529753	1.48828	0.841849	1.94546	1.51761	4.61929	0.377018	7.70828	5.33267	3.55723	2.08582	7.05303	0	4.14861	2.15311	6.45031	0.513576	8.49471	2.46753	0	10.2432
ENSG00000065526.10	SPEN	1.52343	3.00884	1.14765	3.69632	3.92704	2.03591	2.73102	0.276959	1.60233	0.629299	1.95615	0.24094	2.67949	3.06589	0.633398	1.27003	4.11347	2.30895	2.14009	1.1682	2.43901	1.45565	1.93388	2.65779	0.583509	1.07846	6.55472	1.32639	3.7567	0.459022	0.279556	0.429836	2.41105	2.67621	0.478793	1.59677	1.36242	5.4353	5.16505	0.364473	2.27069	2.18074	1.07307	1.85399	5.26801	3.9346	0.276051	1.53698
ENSG00000134668.12	SPOCD1	0	0	0	0	0	0	0	0	0	0	0	0	0	0	0	0	0	0	0	0	0	0	0	0	0	0	0	0	0	0	0	0	0	0	0	0	0	0	0	0	0	0	0	0	0	0	0	0
ENSG00000010072.15	SPRTN	0	0	0	0	0	0	0	0	0	0	0	0	0	0	0	0	0	0	0.22612	0	0	0	0	0	0	0	0	0	0	0	0	0	0	0	0	0	0	0	0	0	0	0	0	0	0	0	0	0
ENSG00000171621.13	SPSB1	0	0.306634	0	0	0	0	0	0	0	0	0	0	0	0	0	0	0.527878	0	2.11378	0.481627	0.741326	0.246697	0.552789	0	0	0.322986	0	0.176584	0.297656	1.25123	0	0	0	0	0	0	0	0.183442	1.39214	0	0	0.268967	0	0	0.808815	0	0.935778	0
ENSG00000163554.13	SPTA1	0	0	0	0	0	0	0	0	0	0	0	0	0	0	0	0	0	0	0	0	0	0	0	0	0	0	0	0	0	0	0	0	0	0	0	0	0	0	0	0	0	0	0	0	0	0	0	0
ENSG00000266028.7	SRGAP2	0	0	0.326655	1.27775	0	0	0.216125	0.276959	0.815984	0	0.573911	1.40245	0	0.710598	0.241586	0.332188	0.901303	0	0.743501	0.78096	1.45533	0	0	0	0	0	1.29173	0.3276	0	0	0.547682	0	0	0.340425	1.02961	0	0	0.183442	2.39087	0	0	0	0.97053	0.768784	0	0.170753	0.291488	0.585987
ENSG00000196369.11	SRGAP2B	0	0	0	0	0	0.256886	0	0	0.267055	0	0	0	0	0.746836	0	0	0.263939	0	0	0	0.234719	0	0	0	0	0	0	0	0.649888	0	0	0	0	0	0	0	0	0.506354	0.688377	0	0.28164	0	0.787702	0	0.412543	0	0	0
ENSG00000171943.11	SRGAP2C	0.263777	0	0	0.604644	0.401187	0.256886	0	0	0	1.2586	0.400444	0	0	0	0.483172	0.302829	0	0.422015	0.22612	0	0	0.187335	0	0	0	0	0	0	0	0.280616	0	0	0	0	0	0	0.267418	0	0.344189	0	0	0	0	0.513576	1.34289	0.170753	0.291488	0
ENSG00000270872.2	SRGAP2D	0	0.306634	0	0	0	0.256886	0	0	0	0	0.400444	0.24094	0	0	0	0	0	0	0	0	0	0	0	0	0	0	0	0	0	0	0	0	0.269653	0	0	0	0	0	0	0	0	0	0	1.02715	0.267894	0	0	0
ENSG00000116649.9	SRM	0	0	0	0	0	0	0	0	0	0.581	0	0	0	0	0	0	0	0	0	0	0	0	0	0	0	0	0	0	0	0	0	0	0	0	0	0	0	0	0	0	0	0	0	0	0	0	0	0
ENSG00000143742.12	SRP9	0.527554	0	0	0	0	0	0	0	0	0	0	0	0	0	0	0	0	0	0	0	0	0	0	0	0	0	0	0	0	0	0	0	0	0	0	0	0	0	0.688377	0	0	0	0	0	0	0	0	0
ENSG00000133226.16	SRRM1	1.01094	0	0.326655	1.81393	0	0	0.255961	0	0.267055	0.581	0	0	0.285577	1.58895	0.875824	0	0	0	1.487	0.505539	0.479282	0.187335	0	0	0	0	2.58346	0	0.561837	0.280616	0	0	0	0.827467	0.509506	1.1247	0.894606	0.506354	0	0.364473	0	0	0	1.82	0.535787	0.367168	0	0.310998
ENSG00000188529.14	SRSF10	0	0	0	0	0	0	0	0	0	0.547384	0	0	0.620102	0.56179	0	0	0	0	0	0	0	0	0	0.691177	0	0	0	0	0	0	0	0	0.341285	0.377018	0	0	0	0	0	0	0	0	0	0	0.808815	0.189599	0	0
ENSG00000116754.13	SRSF11	0	0.613268	0	0	0.401187	0.435243	0	0.276959	1.7074	0	0.251606	0.559888	0.285577	0	0.558285	1.18816	0.35381	0.292181	0.517381	0.552102	1.47281	0	1.61616	0.691177	0.583509	0.468839	0.7949	1.50698	0.595312	0.739639	0.559112	0.252936	0	0.602365	0.257402	0.908664	1.43839	0.550325	0.344189	0.364473	0.733794	1.38167	0	1.08521	0.537499	1.82902	0	0
ENSG00000116350.16	SRSF4	7.88896	5.66807	4.80208	6.92492	6.29651	6.73422	3.23496	1.97875	5.16296	5.85405	8.46825	4.95954	2.43146	2.7326	1.35816	3.37288	11.9587	4.81276	11.0656	3.64618	8.55732	8.53232	2.81129	12.2929	1.16702	4.8241	7.93222	3.84731	7.62255	5.2204	6.41272	4.00174	1.89965	7.48983	4.11736	4.18571	10.6553	4.08458	9.41313	3.34072	1.43455	8.04957	3.4022	8.50748	18.2647	20.4627	5.56828	8.81859
ENSG00000157216.15	SSBP3	0.270788	0.613268	0	0	0.401187	0	0	0	0.281873	0	0.400444	0	0	0.187263	0	0	0	0.292181	0	0	0.469438	0	0	0	0	0	0.298068	0	0	0.250246	0.279556	0	0.808958	0.261939	0	0.355187	0	0	0.359576	0	0	0	0	0	0	0	0	0.292993
ENSG00000163479.13	SSR2	0.791331	0	0	0	0	0.870486	0	0.968237	0	0	0	0	0	0.54284	0	0.302829	0.263939	0.876544	0	0	0.262044	0.170444	0	0	0	0	0	0.26688	0.352232	0	0	0	0	0	0.239396	0.648101	1.46372	0.338014	0.703765	0	0	0	0.4682	0.513576	0	0	0.276051	0.689619
ENSG00000117155.16	SSX2IP	0.512483	0.306634	0.812043	1.34621	0.759961	0.645361	0.255961	0.22942	0.815984	1.64215	2.84165	1.75767	0.631504	0.560127	1.19252	0	1.94312	2.67017	2.14009	0.228857	0	0.434032	0	1.19715	0	0	1.29173	0.3276	0.914069	0	0	1.01174	0	1.84874	0.527512	0	0.560161	0.535223	0	0.364473	0	0	0	0.734799	1.91806	0.720705	0	0
ENSG00000126091.20	ST3GAL3	0	0	0.326655	0.673104	0	0	0	0.22942	0.815984	0	0.251606	0.24094	0	0	1.35984	0.996563	0	0	0.915328	0	1.00337	0.869112	0.331496	0.292128	0.583509	0.322986	0.297039	0	1.19062	0	0	0	0	0.261939	0	1.9777	0	0.16834	1.07873	0	0	1.35405	0	0	1.3643	0	0.881966	0.292993
ENSG00000184005.10	ST6GALNAC3	0	0	0	0	0	0	0	0	0	0	0.400444	0	0	0	0	0.302829	0	0	0	0	0	0	0	0	0	0	0	0	0	0.280616	0	0	0	0	0	0	0	0	0	0	0	0	0	0	0	0	0	0
ENSG00000117069.14	ST6GALNAC5	0	0	0	0	0	0.513773	0	0	0	0	0	0	0	0	0	0	0	0	0	0	0	0	0	0	0	0	0	0	0	0	0	0	0	0	0	0	0	0	0	0	0	0	0	0	0	0	0	0
ENSG00000007341.18	ST7L	0.783271	3.31548	3.59273	3.09168	4.67841	4.67284	3.99592	1.42708	4.03546	2.25677	1.79987	4.43447	3.81517	5.36877	10.2778	12.9716	4.31696	5.81913	13.1848	4.74327	5.08541	1.95829	3.6336	7.11246	1.38541	5.04353	2.9745	3.62359	6.97269	2.62394	3.6228	6.25381	5.13548	3.27833	0.239396	5.49304	7.18561	3.29441	14.532	1.96401	3.58533	8.12056	2.72891	10.7281	9.97883	7.78586	3.5358	3.1552
ENSG00000123473.15	STIL	10.7733	2.665	5.32281	6.32028	10.4799	5.7852	3.91732	1.0603	7.89412	0.547384	11.3173	2.64198	1.89451	2.86079	3.04926	3.97317	8.67063	0.913069	11.6816	5.5158	4.65314	6.54845	3.34342	5.59816	3.61025	0.755471	4.95962	4.33394	8.32702	6.08299	2.55608	2.64562	4.16849	3.65054	5.13956	5.40955	4.34792	5.57477	13.8489	5.33686	3.20135	11.5099	2.71689	5.37789	6.50393	3.80756	1.74099	3.82682
ENSG00000196182.10	STK40	0.791331	1.53317	2.03906	2.01931	3.30643	2.50291	0.767883	0.828636	1.41071	2.83777	1.9915	4.74505	1.93206	2.54422	0.316699	0.996563	2.43429	3.70082	4.83911	1.26322	4.45559	0.587585	1.19512	1.93839	0.583509	1.4378	2.68071	0.92208	2.45692	0.479757	0.559112	1.3104	1.67373	3.20514	1.29442	1.36961	3.44437	3.15093	1.95964	0	0.572065	2.12113	1.00466	5.4391	5.03779	1.56846	1.21183	1.84579
ENSG00000117632.22	STMN1	0	0	0	0	0.802374	0	0	0	0	0	0	0	0	0	0	0	0	0	0	0	0	0	0	0	0	0	0	0.655199	0	0	0	0	0	0	0	0.227166	0	0	0	0	0	0	0	0	0	0.379199	0	0
ENSG00000001460.17	STPG1	0	0	0	0	0	0	0.216125	0	0	0	0	0	0	0	0	0	0	0	0.454952	0	0	0	0	0	0	0	0	0	0	0	0	0	0	0	0	0	0	0	0	0	0	0	0	0	0	0	0	0
ENSG00000143093.14	STRIP1	0.263777	0	0	0	0	0	0	0	0	0	0	0	0.345927	0	0	0	0	0	0	0	0	0	0	0	0	0	0	0	0	0	0	0	0	0	0	0.216034	0	0	0	0	0	0	0	0	0	0	0	0.310998
ENSG00000117758.13	STX12	0.483388	0.687692	0	0	1.83153	1.33749	0.792815	0.22942	0.801166	0	0.286956	0	0	0.860515	0.316699	0.291251	0.537685	0.292181	0.22612	0.276051	0.469438	1.36355	1.19512	0.848167	0	0	0.298068	0	0.297656	0.280616	0.279556	0.597308	0.76523	0.377018	0.239396	0.787255	2.01493	0.703563	1.06334	0	0.871274	0.461283	0.4682	2.91828	1.48583	1.48672	0.329864	0.637803
ENSG00000135823.13	STX6	10.0763	5.57913	10.0276	4.23251	20.1407	15.8248	13.6849	3.77709	7.57149	9.32111	4.84387	3.03346	8.34499	23.5028	5.60077	20.3532	13.6927	18.407	13.4408	5.50869	13.872	6.6165	22.8451	31.2173	13.7108	7.91912	11.6044	16.0669	10.3189	14.4996	9.40203	6.88538	4.43814	7.11232	11.7197	7.74905	12.271	3.30417	31.96	4.43414	22.1058	17.2573	4.84078	12.0993	14.4346	17.4116	5.92901	18.7529
ENSG00000116266.10	STXBP3	1.54551	0.65048	0.732677	0	0.759961	1.2059	0	0.22942	0.815984	1.72407	1.36408	0.722821	0.620102	0.710044	2.40129	2.11443	0.527878	1.29856	2.00981	0.228857	1.428	0.621366	0.331496	0	1.96892	0.645973	0	0	1.21173	0	0.279556	0.859673	0	1.87522	0	0.227166	0.714721	0.338014	1.76711	1.51835	0.290425	0.769264	1.32431	0.350407	2.42131	2.54893	0.552102	2.14098
ENSG00000094975.13	SUCO	3.31659	7.71422	4.89912	9.75426	10.7688	4.98278	7.49172	1.33502	8.4875	5.20581	10.404	3.83831	11.2806	5.47527	6.4766	6.93736	6.58293	10.4655	5.8576	8.12177	8.40237	8.18934	2.54265	13.9606	5.10486	3.70928	7.84203	9.30391	4.27266	5.90366	10.2407	1.69451	2.10246	12.5849	5.55692	2.90863	9.98863	14.6021	41.243	4.33027	0.725009	7.01134	3.23124	13.1474	3.39105	9.07651	5.14674	6.36442
ENSG00000143502.14	SUSD4	0	0	0	0	0	0	0	0	0	0	0	0	0	0	0	0	0	0	0	0	0	0	0	0	0	0	0	0.3276	0	0	0	0	0	0	0	0	0	0	0	0	0	0	0	0	0	0	0	0
ENSG00000159164.9	SV2A	0	0	0	0	0	0	0	0	0	0.581	0	0	0	0	0	0	0	0	0	0	0	0	0	0	0	0	0	0	0	0	0	0	0	0	0	0	0	0	0	0	0	0	0	0	0	0	0	0
ENSG00000116668.12	SWT1	0	2.14644	0.326655	1.27775	3.61544	0.513773	0	0.414318	1.73837	1.09477	0	2.47759	1.58613	0	0.241586	1.93441	0	3.29106	0.582524	1.39706	2.7109	0.528223	3.16433	0.823132	0	0.322986	1.68602	0.176584	1.29978	1.24977	1.09536	2.20636	0.539305	1.12624	0.239396	0.809519	0.267418	1.68874	0.911687	0	1.45212	0.931775	0.4682	2.78594	1.07671	1.44141	0	0.585987
ENSG00000097096.8	SYDE2	0.534565	2.35836	0.406021	0	1.07157	0.435243	0.984008	0.22942	0.830802	0	0.652051	0.481881	0.856731	0.373418	0.79987	0	0	0.913069	3.34126	0.252769	0.993526	0.587585	0.276394	0.292128	0	0	0	0.3276	0.297656	3.52653	0.279556	0	0	0.188509	0.27011	0.571221	1.42944	0.183442	0.567498	0	0.443369	1.20995	0	1.53757	3.9217	1.79575	0.659727	0
ENSG00000117614.9	SYF2	0	0	0	0	0.311608	0	0.536854	0.414318	0	0	0	0.438693	0	0	0	0	0	0	0	0	0	0	0	0.848167	0	0	0	0	0	0.229511	0.547682	0	1.12963	0	0	0	0	0	0.688377	0	0	1.21916	0	0.513576	0.805392	2.00579	0	0.34481
ENSG00000162520.14	SYNC	0	0	0	0	0	0	0	0	0	0.547384	0	0	0	0	0	0	0	0	0	0	0	0	0	0	0	0	0	0	0	0	0	0	0	0	0	0	0	0	0	0	0	0	0	0	0	0	0	0
ENSG00000132718.8	SYT11	0	0	0	0	0	0.256886	0	0	0	0	0	0	0	0	0	0	0	0	0	0	0	0	0	0	0	0	0	0	0	0	0	0	0	0	0	0	0	0	0	0	0	0	0	0	0	0	0	0
ENSG00000143469.18	SYT14	0.769248	0	1.46535	0	2.14314	0	0	0	1.37973	0	2.51606	0.877386	0	0	0	0	0	0.422015	0.904479	0	0	0.187335	0.310838	0	0	0	0.496832	0	2.7087	0	0	0	0	0	0	0	0	0	3.14386	0	0	0	0	0	1.36087	0	0.291488	0
ENSG00000134207.15	SYT6	0	0	0	0	0	0	0	0	0	0	0	0	0	0	0	0	0	0	0	0	0	0	0	0	0	0	0	0	0	0	0	0	0	0	0	0	0	0	0	0	0	0	0	0	0.267894	0	0	0
ENSG00000142765.17	SYTL1	0	0	0	0	0	0	0	0	0	0	0	0	0	0	0	0	0	0	0	0	0	0	0	0	0	0	0	0	0	0	0	0	0	0	0	0	0	0	0.344189	0	0	0	0.4682	0	0	0	0	0
ENSG00000055070.16	SZRD1	0.527554	0.343846	0	0	0	0.217621	0	0	0	0	0	0	0	0	0	0	0.263939	0	0	0	0	0	0	0	0	0	0	0	0	0	0	0	0	0	0	0	0	0	0	0	0	0	0	0	0	0.183584	0	0
ENSG00000198198.15	SZT2	0.483388	0.343846	0	0	0	0	0	0	0.53411	0.547384	0	0.318948	0	0.373972	0	0	0.263939	0	0.582524	0	0	0.715558	0	0.424084	0	0	0.596137	0.86136	0.947544	0	0	0.252936	0.225925	0	0.54022	0	0	0.183442	0	0	0	0	0	0	0.267894	0.537921	0.291488	0
ENSG00000152382.5	TADA1	0.241694	0	0	0	0.311608	0.645361	0.472086	0	0.281873	0	0.251606	0	0.345927	0	0	0.582502	0.537685	0.422015	0.582524	0	0	0.374669	0	0.399049	0	0	0	0.176584	1.21173	0	0.827238	0	0.903702	0.790874	0	0	0	1.25389	0	0	0	0	0	1.21439	0.269605	1.4799	0.291488	0.34481
ENSG00000120656.11	TAF12	1.55953	0.406923	0.494341	0.673104	1.96352	0.435243	0	0.783339	0.281873	0	0.860867	0	0.691854	0.168313	0.875824	2.25502	0.70762	2.17911	0.291262	0	0.479282	1.6092	3.28832	2.12042	0	0.322986	0.298068	0.533761	0.649888	0.250246	0.547682	0.298654	0.677776	1.02128	1.54652	0	0.585486	0.703563	0.927074	0.364473	1.16838	0.192316	0.285371	1.21439	0.805392	2.19539	0	0.585987
ENSG00000143498.17	TAF1A	0.270788	0	0	0	0	0.513773	0	0	0	0	0	0	0	0	0	0.332188	0.273746	0	0	0	0	0	0	0	0	0	0	0	0	0.280616	0	0.252936	0	0	0	0	0	0	0	0	0	0.268967	0	0	0.269605	0.189599	0	0
ENSG00000135801.9	TAF5L	0.270788	0.687692	0	0	0	0	0	0	0	0	0	0	0	0	0	0.332188	0	0	0	0	0	0	0	0	0	0	0	0	0.297656	0.229511	0	0.429836	0.341285	0	0	0	0	0	0.344189	0	0	0	0	0	0	0	0	0
ENSG00000158710.14	TAGLN2	0	0.613268	0.494341	0	0.311608	0	0	0.22942	0	0	0	0	0	0	0	0	0	0	0	0	0	0	0	0	0	0	0.297039	0.443465	0	0	0	0	0	0.523879	0.27011	0	0	0	0	0	0	0.192316	0.4682	0	0	0.189599	0	0
ENSG00000059588.9	TARBP1	0.505471	3.54192	0.406021	2.62396	3.12252	1.81829	0.984008	1.10258	1.94482	0	0.251606	0.24094	2.48041	0.373972	3.75945	0	2.03712	0	6.58835	1.87868	2.21413	0.680729	2.45913	2.38751	1.96892	0.432484	1.98614	0.857352	3.45904	0.250246	0	2.423	0.56721	1.9956	0.988299	0.875267	0.714721	1.70117	3.63664	0.364473	5.2576	2.48735	0.753571	0.350407	1.3643	0.189599	0.605915	0.34481
ENSG00000120948.16	TARDBP	0	0	0.406021	0	0	0	0	0	0.548928	0	0	0.24094	0	0.186709	0	0.635017	0.617749	0	0.452239	0	0.234719	0	0	0	1.16702	0	0	0	0.297656	0	0	0	0.341285	0.450448	0.239396	0	0	0	0.719152	0	0.572065	0	0	0	2.42302	1.11273	0	0.34481
ENSG00000143374.16	TARS2	1.20847	1.15769	0	2.62396	2.05786	0.692129	1.84851	0.22942	0.876596	0.629299	0.790169	0.24094	5.9121	0.729549	2.40045	1.57907	8.60765	0	6.88504	0.252769	1.26541	2.6646	1.89256	0.424084	0.692705	2.9906	0.993664	0.176584	3.72323	1.26087	1.66591	0.597308	1.37617	1.87522	1.56453	1.11357	0.802255	2.42117	0.688377	0	0.28164	3.38011	1.2559	1.24837	2.41618	1.63862	0	0
ENSG00000173662.20	TAS1R1	0	0	0	0	0	0	0	0	0	0	0	0	0	0	0	0.291251	0	0	0	0	0	0	0	0	0	0	0	0	0	0	0	0	0	0	0	0	0	0	0	0	0	0	0	0	0	0	0	0
ENSG00000203705.10	TATDN3	0	0	0	0	0	0	0	0	0	0	0	0.438693	0	0	0	0	0	0	0	0	0	0.246697	0.587232	0	0	0	0	0	0	0	0	0	0	0	0	0	0	0	0.344189	0	0	0.268967	0	0	0.267894	0	0	0
ENSG00000284770.1	TBCE	0	0	0	0	0	0	0	0	0	0	0	0	0	0	0	0	0	0	0	0	0	0	0	0	0	0	0	0	0	0	0	0	0	0	0	0	0	0	0	0	0	0	0	0	0.267894	0	0	0
ENSG00000092607.14	TBX15	0	0	0	0	0	0	0	0.553919	0	0	0	0	0	0	0	0	0	0	0	0.504909	0	0.545114	0	0	0	0.432484	0	0	1.21173	0	0.279556	0	0	0	0	0	0	0	0	0	0	0	0	0.350407	0	0	0	0
ENSG00000143178.12	TBX19	0	0	0	0	0.311608	0.217621	0.216125	0	1.18945	0	0.286956	0	0	0	0	0	0	0	0.22612	0.528821	0	0	0.276394	0	0	0	0	0.26688	0	0	0	0.298654	0.682569	0.261939	0	0.227166	0	0.16834	0.688377	0	0.28164	0	0	0.897968	0.412543	0.556767	0	0.310998
ENSG00000204219.9	TCEA3	0	0	0	0	0	0.256886	0.216125	0.276959	0	0	0	0	0.691854	0	0.241586	0.291251	0	0	0	0	0.262044	0	0	0	0	0.432484	0	0.3276	0	0	0.279556	0	0	0	0	0.648101	0	0	1.39214	0.364473	0	0	0	2.14634	0.412543	0	0	0
ENSG00000162782.15	TDRD5	0.483388	0	0	0	0.224177	0	0	0	0	0	0	0.438693	0.345927	0	0	0	0.263939	1.55823	15.1558	0.252769	0.469438	0	0	3.47774	0	0	1.39001	0	0	0	0	0.72849	0	0	0	0.216034	0	0	0.359576	0	0	9.96214	0	2.45285	0	0.550752	0.582975	0
ENSG00000182134.15	TDRKH	0	0	0	0	0	0	0	0.68826	0	0	0	0	0	0	0	0	0	0	0	0	0	0.187335	0.276394	0	0	0	0	0	0	0	0	0	0	0	0	0.227166	0	0	0	0	0	0.192316	0	0	0.269605	0	0	0
ENSG00000092850.11	TEKT2	0	0	0	0	0	0	0	0	0	0	0	0	0	0	0	0	0	0	0	0	0	0	0	0	0	0	0	0	0	0	0	0	0	0	0	0	0.267418	0	0	0	0	0	0	0	0	0	0	0
ENSG00000070759.16	TESK2	0.270788	0	0	0	0.672531	0	0	0.22942	0	0	0.400444	0.679634	0.285577	0	0.559125	0.302829	1.25511	1.72057	1.5964	0.276051	1.18344	0.187335	1.16068	0.584256	0	0.322986	0.298068	0	0	0.280616	0.547682	0	0	0.188509	0.239396	0	0	0	0.359576	0	0	0.556353	0.4682	0	0.94833	0.568798	0	0
ENSG00000116819.6	TFAP2E	0	0	0	0	0	0	0	0	0	0	0	0	0	0	0	0	0.273746	0	0	0	0	0	0	0	0	0	0	0	0	0	0	0	0	0	0	0	0	0	0	0	0	0	0	0	0	0	0	0
ENSG00000162851.7	TFB2M	0.270788	1.30096	0.326655	0.673104	1.42559	0.776948	0.752979	0.643738	1.12883	0	1.11247	1.75477	1.65788	0.168313	0.633398	0.291251	0	3.57499	0.873785	0.528821	0.262044	1.71924	0.331496	0.848167	0.692705	0.432484	0	0	0.297656	0	0	0.804525	0.721503	0.450448	0	1.60791	0.447303	0.16834	1.60006	0.364473	0.28164	1.38167	0.285371	1.85399	0.805392	2.94697	0.621351	0.292993
ENSG00000092969.11	TGFB2	0	0	0	1.34621	0.311608	0	1.8336	0	1.12883	0	0.286956	1.19633	0	0.186709	0	0.291251	0	0.292181	0.681071	0.228857	0	0.246697	0	1.43242	0	0	4.06866	0	0.704464	0	0.279556	0.298654	0.952222	0.188509	0.239396	0.216034	0.714721	0.50502	3.1408	0.506118	0	0	0	0	0.269605	0.373183	0	0.292993
ENSG00000069702.10	TGFBR3	0.241694	1.74509	0	0	0.448354	0.513773	0	0.414318	0	0	3.423	0	0	0	0	0.664375	0	0	0	0	1.90508	0	0	0	0	0	0.298068	0	0.297656	1.30087	0	0.252936	0.836863	0.188509	0	0.4432	0	0.676028	0.927074	0	0	0	0	0	0.412543	0.904289	0	3.48421
ENSG00000041988.15	THAP3	0	0	0	0	0	0.388474	0	0	0	0	0	0	0	0	0	0	0	0	0.228832	0	0	0	0	0	0	0	0	0	0	0	0	0	0	0	0	0.227166	0	0	0	0	0	0	0	0	0	0	0	0
ENSG00000169231.13	THBS3	0	0	0	0	0	0.217621	0	0	0	0	0	0	0	0	0	0.302829	0	0	0	0	0	0.562004	0.662992	0	0	0	0	0	0	0	0	0	0	0	0	0	0	0	0	0	0	0.268967	0	0	0	0	0	0.34481
ENSG00000159445.12	THEM4	0	0.813846	0.326655	0	0	0	0	0	0	0	0	0	0.345927	0	0.316699	0	0	0	0	0	0	0.340888	0	0	0	0	0	0	0	0	0	0	0	0	0.478793	0	0.534836	0	0.359576	0	0	0	0	0	0	0	0	0
ENSG00000054118.13	THRAP3	0	0.306634	0	0	0	0	0	0	0	0	0.538562	0.318948	0	0.186709	0.483172	0.291251	0	0.422015	0	0	0.479282	0.170444	0	1.46064	2.66162	0	0	0	0	0	0	1.18864	0	0.261939	0	0.432068	0	0	0.567498	0	0.28164	0	0	0.734799	0.808815	0	0	0.966805
ENSG00000134375.10	TIMM17A	0	0	0	0	0	0	0	0	0	0	0	0	0	0	0	0	0	0	0	0	0	0	0	0	0	0	0	0	0	0	0	0	0.341285	0	0	0	0	0	0	0	0	0	0	0	0	0	0.329864	0
ENSG00000142910.15	TINAGL1	0	0	0	0	0	0	0.216125	0	0	0	0	0	0	0	0	0	0	0	0	0	0	0	0	0	0	0	0	0	0	0	0	0	0	0	0	0	0	0	0	0	0	0.537934	0	0	0	0	0	0
ENSG00000143155.12	TIPRL	0	0	0	0	0	0	0.432249	0	0	0	0	0.318948	0	0	0	0	0	0	0	0	1.04818	0	0	0	0	0	0	0	0	0	0	0	0	0	0	0	0	0	0	0	0.28164	0	0	0	0	0.170753	0.329864	0
ENSG00000187554.12	TLR5	0	0	0	0	0	0	0	0	0	0	0	0	0	0	0.633398	0	0	0	0	0	0.741326	0	0.276394	0	0	0	0	0	0	0	0	0.298654	0.341285	0	0	0.432068	0	0	0.359576	0	0	0	0.4682	0	0	0	0	0
ENSG00000162604.12	TM2D1	0	0.406923	0	0.604644	0.401187	0.256886	0.216125	0	1.12883	0	1.11247	0.24094	0	0	0	0.332188	0	0.714196	0	0	0	0	0.994488	0	0	0	0	0	0	0	0.279556	0	0.225925	1.35135	0	0.216034	0.878229	0.703563	0	0.728946	0	0.537934	0	0	0.805392	0.189599	0	0
ENSG00000133069.15	TMCC2	0	0	0.820996	0	0	0	0	0	0	1.09477	0.573911	0.24094	0	0	0	0.996563	0	0	0	0.252769	0	0.715558	0	0.292128	0	0	0	0	0.561837	0.811479	0	0	0.451851	0	0	0	0.585486	0	2.16756	0	0	0	0	0.513576	0.808815	0	0.276051	0
ENSG00000143183.16	TMCO1	0	0	0	0	0.847392	0	0	0	0	0	0.286956	0	0	0.373972	0	0.332188	0	0	0.291262	0	0.938876	0.170444	0	0	0	0	0	1.3104	0.595312	0	0	0	0	0	0.239396	0	0	0.338014	1.07873	0	0	0	0	2.27237	0	0.170753	0	0.655807
ENSG00000162542.13	TMCO4	0	0.613268	0	0	0.535785	1.24517	1.07371	0.414318	1.09786	0	0	0.963762	0.345927	2.63618	0	0.302829	0.273746	0.714196	0.975045	0	1.89744	0.680729	0.621676	0	0	0.322986	0	0	1.94966	0.750738	0.279556	0	0.269653	1.16284	0	0.454332	0	0.16834	1.06334	0.364473	1.00665	1.02685	0.285371	1.40163	0	1.09389	0.276051	0.310998
ENSG00000117500.12	TMED5	0	0	0	0	0	0.217621	0	0	0.53411	0	0	0	0	0	0	0.996563	0	0	0	0	0	0	0	0	0.692705	0	0	0	0	0	0	0.298654	0	0	0	0	0	0	0	0	0	0	0	0	0	0	0	0
ENSG00000163444.11	TMEM183A	0	0	0	0	0	0	0	0	0	0	0	0	0	0	0	0.291251	0	0	0	0	0	0	0	0.399049	0	0	0	0	0	0	0	0	0	0	0	0	0	0	0	0	0	0	0	0	0	0	0	0
ENSG00000188807.12	TMEM201	0	0	0	0	0	0	0	0	0	0	0	0	0	0	0	0	0	0	0	0.228857	0	0	0	0	0	0	0	0	0	0	0	0	0	0	0	0	0	0	0	0	0	0	0	0	0.269605	0	0	0
ENSG00000065600.12	TMEM206	0	0	0	0	0	0	0	0	0	0	0	0	0	0	0	0	0	0	0	0	0	0	0	0	0	0	0	0	0.595312	0	0	0	0	0	0	0	0	0.16834	0	0	0	0	0	0	0	0	0	0.621996
ENSG00000186501.14	TMEM222	0	0.306634	0	0	0	0	0	0	0.53411	0	0	0	0	0	0	0	1.17505	0	0.228832	0	0	0	0	0	0	0	0	0	0	0	0	0	0	0	0	0	0.267418	0	0	0	0	0	0	0	0	0	0	0
ENSG00000160055.19	TMEM234	0	0	0	0	0	0	0	0	0	0	0	0	0	0	0	0	0	0	0	0.228857	0	0.170444	0	0	0	0	0	0	0	0	0	0	0	0	0	0	0	0	0	0	0	0	0	0	0	0	0	0
ENSG00000274386.5	TMEM269	0	0	0	0	0.311608	0	0	0	0	0	0	0	0	0	0	0	0	0	0	0	0	0	0	0	0	0	0	0	0	0	0	0	0	0	0	0	0	0	0	0	0	0	0	0	0	0	0	0
ENSG00000121775.17	TMEM39B	0.512483	0	0.326655	0	0	0.823717	0	0	0.267055	0.581	0.251606	0.318948	0	0	0	0.291251	0	0	0.582524	0.505539	0.94872	0.434032	0.662992	1.11526	0	0.468839	0	0	0	0	0	0	0.808958	0.261939	0.514804	0.582353	0.292743	0	1.42292	0	0.28164	0	0.4682	0.700813	0	0.183584	0.567539	0.637803
ENSG00000183726.10	TMEM50A	1.6037	0.994326	1.3947	0.604644	0.623215	1.85877	0.216125	0.276959	1.4565	0.629299	0.503213	0	0	0.541731	0.874983	0.59408	0.617749	1.24178	1.65883	0	2.95546	2.46038	0.932515	0.798098	0	1.40144	0.595107	1.15381	2.4904	2.23965	0.838668	0.551589	1.71266	1.61328	0.27011	0.659234	2.94642	0	2.42471	0	0.28164	0	0.753571	2.84715	2.41618	1.65066	0.567539	0.292993
ENSG00000152078.9	TMEM56	5.33952	4.94317	0.494341	3.29706	15.3036	2.32456	2.05772	4.92273	1.89902	0	0	0.318948	3.33714	0.560127	2.47472	3.80473	5.95278	1.88693	1.42457	2.10754	4.5004	6.70965	0.898071	8.18444	0	0.968959	1.68499	0.533761	2.03774	2.19965	8.26095	2.36786	2.05394	3.61394	1.29972	3.23356	14.2427	0.16834	6.20466	0.364473	0.886738	0	2.97985	1.15318	0.680436	1.27146	0.828154	0
ENSG00000271092.5	TMEM56-RWDD3	0	0	0	0	0	0	0	0	0	0	0	0	0	0	0	0	0	0.292181	0	0	0	0	0	0	0	0	0	0	0	0	0	0	0	0	0	0	0	0	0	0	0	0	0	0	0	0	0	0
ENSG00000204178.9	TMEM57	0	0	0.326655	0	1.24858	0	0.472086	0.414318	1.14365	0	0	0.559888	1.2402	0	0.241586	0.291251	0.263939	0	0.228832	0	0.234719	0	0	0.716212	0.583509	0	0.297039	0.353169	1.35435	1.03135	0	0.551589	1.17815	0.712388	1.28701	0	0	0	0.703765	0	0.443369	0.845915	0	0	0.805392	0.183584	0.329864	0
ENSG00000116209.11	TMEM59	0.241694	0.406923	0	0.604644	0.625364	0	0	0.276959	0	0.629299	0.6874	0.318948	0	0	0	0.302829	0	1.00638	2.5299	0.552102	0.758807	0.246697	0.552789	0.424084	0	0.322986	0	0.529753	0.595312	0.280616	0	0	1.07861	0.790874	0	0.454332	0	0.521456	2.06513	0	0	1.20995	0.502331	1.15318	0.53921	0.537921	0	0
ENSG00000196187.11	TMEM63A	0	0	0.406021	0	1.33816	0.513773	0.432249	0	0.815984	0	0	0	1.65788	0.374527	0.559125	0	1.06143	0	0.907191	0.252769	0	0	0	0	0	0	0.496832	0.857352	0.297656	0	0	0	0.269653	0.340425	0.257402	0	0	0	0	0	0	0.268967	0.502331	0	0	0.341506	0.329864	0
ENSG00000116857.16	TMEM9	0	0	0	0	0	0	0	0	0	0	0	0.24094	0	0	0	0	0	0	0	0.228857	0.958564	0	0	0	0	0	0	0	0	0	0	0	0	0	0	0	0	0	0	0	0	0	0	0	0	0	0	0
ENSG00000163157.14	TMOD4	0	0	0	0	0	0	0	0	0	0	0	0	0	0	0	0.332188	0.901303	0	0.454952	0.228857	0	0	0	0	0	0	0	0	0	0	0	0	0	0	0	0	0	0	0.359576	0	0.28164	0	0	0	0	1.08106	0	0
ENSG00000157873.17	TNFRSF14	0	0	0	0	0	0	0	0	0	0	0	0	0	0	0	0	0	0	0	0	0	0.246697	0	0	0	0	0	0	0	0	0	0	0	0	0	0	0	0	0	0	0	0	0	0	0	0	0	0
ENSG00000028137.18	TNFRSF1B	0	0	0	0	0	0	0	0	0	0	0	0	0	0	0	0	0	0	0	0	0	0.417141	0	0	0	0	0	0	0.297656	0	0	0	0	0	0	0	0	0	0	0	0	0	0	0	0	0	0	0
ENSG00000120949.14	TNFRSF8	0	0	0	0	0	0	0	0	0	0	0	0	0	0	0	0	0	0	0	0	0	0	0	0	0	0	0	0	1.4548	0	0	0	0	0	0	0	0	0	0	0	0	0	0	0	0	0	0	0
ENSG00000049249.8	TNFRSF9	0	0	0	0	0	0	0	0	0	0	0	0	0	0	0	0	0	0	0.228832	0	0	0	0	0	0	0	0	0	0	0	0	0	0	0	0	0	0	0	0	0	0	0	0	0	0	0	0	0
ENSG00000118194.18	TNNT2	0	0	0	0	0.311608	0	0	0	0	0	0	0	0	0	0	0	0	0	0	0	0	0	0	0	0	0	0	0	0	0	0	0	0	0	0	0	0	0	0	0	0	0	0	0	0	0	0	0
ENSG00000173726.10	TOMM20	0	0	0	0	0	0	0	0	0	0	0	0	0	0	0	0	0	0	0	0	0	0.187335	0	0	0	0	0	0	0.352232	0	0	0	0	0	0	0	0.267418	0	0	0	0	0	0	0	0	0.170753	0	0
ENSG00000158882.14	TOMM40L	0	0	0	0	0	0	0	0	0	0	0	0	0	0	0	0	0	0	0	0	0	0	0	0	0	0	0	0	0.352232	0	0	0	0	0	0	0	0.447303	0	0	0	0	0	0	0.384392	0	0	0	0
ENSG00000143337.18	TOR1AIP1	0	1.74509	0	0	0.224177	0.474508	1.02384	0.414318	0	0	0	0.24094	0	0	0	0.635017	0.35381	1.13621	1.19845	0.252769	0	0.246697	0	0.823132	0	0	0.891116	0	0.595312	0.811479	0	0	0.682569	0	0.257402	0	0.852904	0	0.688377	0	0.443369	0	0	0.513576	0.267894	0	0	0.34481
ENSG00000169905.12	TOR1AIP2	0	0.306634	0.406021	0	0	0.217621	0	0	0.267055	0	0	0	0	0	0	0	0	0.422015	0	0	0.234719	0	0	0.399049	0	0	0	0.3276	0.297656	0	1.09536	0	0.225925	0.261939	0	0	0	0.16834	1.135	0	0	0	0	0	0.680436	0.354337	0	0
ENSG00000186283.13	TOR3A	0	0	0	0	0	0	0	0	0	0	0	0.481881	0	0.168313	0	0	0	0.422015	0.582524	0	0	0.927426	0	0	0	0	0	0	0.859493	0.688534	0	0	0	0	0	0	0	0	0	0	0	0	0	0.700813	0	0	0	0
ENSG00000143514.16	TP53BP2	1.03303	1.8398	1.30638	0	3.38957	0.823717	1.76192	1.24295	1.63197	2.38698	0.825518	0.481881	0	0.373418	0.559125	1.50257	0.617749	3.09218	2.24135	1.37314	0	1.85695	0.97383	2.97855	0	0.791825	1.09297	1.51656	2.35647	1.83173	0.827238	0.252936	3.16046	1.05787	0.496798	1.49763	1.56763	1.19482	5.33209	0.364473	0	0	1.94106	3.77911	2.41446	6.50158	0.828154	1.84579
ENSG00000078900.14	TP73	0	0	0	0	0	0	0	0	0	0	0	0	0	0	0	0	0.70762	0	0	0	0	0	0	0	0	0	0	0	0	0	0	0	0	0	0	0	0	0	0.703765	0	0	0	0	0	0	0	0	0
ENSG00000227372.11	TP73-AS1	0.812365	0.306634	0.653311	0.604644	0	0.652864	0.216125	0	1.06822	0	0.825518	0.637895	0	0	0.558285	0.302829	2.66881	2.69444	0.683784	0	1.00337	0.374669	0	1.27543	0.583509	0	0.298068	0.680768	0.297656	1.2194	0.838668	2.71223	0.225925	0.377018	0.527512	0	0.802255	0.183442	1.07873	0	0.28164	0	0.285371	0.384392	1.07157	0.549952	0	6.19306
ENSG00000143549.19	TPM3	3.03984	1.98865	2.19803	2.41857	1.0244	2.67498	0.216125	2.25571	1.44034	2.4206	2.14034	2.07372	12.7674	2.1697	3.89343	2.45819	4.09953	2.69444	8.86144	0.757678	1.6802	3.15904	2.64598	1.19715	0	3.05824	1.48622	3.10983	1.35435	2.82162	2.7727	0.804525	1.33244	7.05479	1.2277	2.15686	3.75762	5.4051	6.55719	0.728946	2.75588	2.70947	3.29965	0.700813	9.72036	2.74534	1.7948	2.15898
ENSG00000047410.13	TPR	1.25965	0.994326	0.406021	0	1.47276	1.76523	0.68821	1.1056	0.548928	0	0.573911	0.722821	1.20266	0.523335	0.800711	0.926268	0.70762	1.55823	2.99028	0.528821	0	1.32003	0.953173	1.27225	0	0.791825	2.2854	0.710345	0.649888	1.42817	0.878748	0.859673	1.29351	0.523879	1.51581	0.809519	1.88569	0.16834	3.18168	0	1.15291	1.51793	0.502331	2.46276	2.43758	0.734336	0.567539	0.603991
ENSG00000269113.3	TRABD2B	0	0	0	0	0	0	0	0	0	0	0	0	0	0	0	0	0	0	0	0	0	0	0	0	0	0	0	0	0	0	0.279556	0	0	0	0	0	0	0	0	0	0	0	0	0	0	0	0	0
ENSG00000082512.14	TRAF5	0	0.65048	0	1.27775	2.10502	0.474508	0	0.414318	0.267055	0	0.754819	2.31466	1.93206	2.32072	1.84133	1.21132	0	0.422015	1.14416	0.962624	0.234719	2.35749	0.310838	0	0	0	0.894205	0	3.40447	0.479757	0.559112	0.429836	0	0.261939	0.239396	0.454332	1.43839	1.01271	3.59576	0.728946	0.290425	0	1.32431	0.513576	0	2.1569	1.42657	0.292993
ENSG00000054116.11	TRAPPC3	0.263777	0	0.326655	0	0	0	0	0	0	0	0	0	0	0.187263	0	0	0	0	0	0	0	0.493394	0	0	0	0	0	0	0.297656	0	0	0	0	0	0	0.216034	0	0	0	0	0	0	0	0	0	0	0.276051	0
ENSG00000154370.15	TRIM11	0	0.306634	0	0	0	0	0	0	0.267055	0	0	0	0	0	0	0	0	0	0	0	0	0	0.276394	0	0	0	0	0	0	0	0.279556	0	0	0	0	0	0	0	0.359576	0	0.28164	0.556353	0	0	0	0.373183	0.276051	0.34481
ENSG00000197323.11	TRIM33	3.07699	5.96336	0.900362	3.09168	7.50053	3.32784	0.944171	1.38256	3.7896	2.88607	4.49268	1.35927	1.19126	2.99231	1.35984	6.82144	10.6881	3.76985	4.60214	1.46816	3.44238	2.96302	3.96509	0.292128	2.33404	3.70421	2.58331	3.49814	1.94966	3.92917	3.32038	3.06603	4.85001	5.56235	1.53382	4.13456	3.87048	4.99824	8.47595	0.728946	2.15956	0.576948	2.83145	2.84715	15.4668	5.35717	0.881966	2.78098
ENSG00000134253.9	TRIM45	0	0	0	0	0	0	0	0	0	0.629299	0	0	0	0	0	0	0	0	0	0	0	0.187335	0	0	0	0	0	0	0	0	0	0	0	0	0	0.216034	0	0	0	0	0	0	0	0	0.807103	0	0	0
ENSG00000163462.17	TRIM46	0	0	0	0	0	0	0	0	0	0	0.286956	0	0	0	0	0	0	0	0	0	0	0	0	0	0	0	0	0.3276	0	0	0	0	0	0	0	0	0	0	0	0	0	0	0	0	0	0	0	0
ENSG00000162722.8	TRIM58	0	0	0	0	0	0	0	0	0	0	1.26131	0	0	0	0	0	0	0.422015	0	0	0	0	0	1.1403	0	0	0.297039	0	0	0	0	0	0	0	0	0	0	0	0.344189	0	0	0	0	0	0.412543	0	0	0
ENSG00000116525.13	TRIM62	0	0	0.406021	0	0	0	0	0	0	0	0	0	0	0.168313	0	0	0	0	0.520094	0	0.469438	0	0	0	0	0	0.297039	0	0	0.229511	0	0	0	0.261939	0	0	0	0	0	0	0	0.192316	0	0	0	0	0	0
ENSG00000043514.15	TRIT1	0	1.12048	0.732677	1.88239	0.936971	0.217621	1.52086	0.22942	0.815984	0.629299	2.19704	1.79941	0.345927	0.186709	0.874983	1.28781	6.30092	2.15484	1.66425	0.457715	2.88333	2.98096	0.863627	1.38235	0	0.645973	1.29173	1.27525	3.14029	2.48026	0.827238	0.895961	1.03488	1.46642	1.80181	0.432068	0.852904	1.37692	1.06334	0	1.12656	0.931775	0.285371	1.82	2.4196	1.59412	0.552102	1.48297
ENSG00000122435.9	TRMT13	0	0	0	0	0	0	0	0	0	0	0	0	0	0	0	0	0	0	0.582524	0	0	0	0	0	0	0	0	0	0	0	0	0	0	0	0	0.216034	0	0	0	0	0	0	0	0	0	0	0	0.310998
ENSG00000121486.11	TRMT1L	0	0	0.326655	0	0.311608	0.388474	0.320729	0	0	0.629299	0.286956	0	0.345927	0	0	0	0	0	0.457664	0	0	0	0.932515	0	0	0	0.298068	0.176584	0.649888	0	0	1.36554	0	0	0	0.355187	0.894606	0	0.344189	0	0	0	0	0	0.412543	0.51226	0.276051	0
ENSG00000180098.9	TRNAU1AP	0	0	0	0	0	0	0	0	0	0	0.251606	0.24094	0	0.186709	0	0	0.791817	0.876544	0	0	0	0	0	1.00834	0	0	0	0	0	0.229511	0	0	0	0.340425	0	0	0	0	0.344189	0	0	0	0	0.384392	0.267894	0.360353	0.874463	0
ENSG00000116747.12	TROVE2	0.270788	0.813846	0	0	1.0244	1.812	1.52086	0.91768	1.95964	0	1.36408	2.11691	1.31196	1.42064	1.28388	2.67915	0.263939	0.714196	0.686496	0.228857	1.93461	2.80022	2.10698	1.53934	0	0	3.77265	0.504184	0.297656	0.730003	1.37492	3.20664	0	1.24132	0.478793	1.74706	0	1.89704	1.07873	0.364473	2.61172	1.47892	1.47286	0	1.6125	1.27146	0.912839	4.93326
ENSG00000198860.12	TSEN15	0	0	0	0	0	0	0	0	0	0	0	0.318948	0	0.187263	0	0	0	0.422015	0	0	0	0	0	0	0	0	0	0	0.297656	0	0	0	0	0	0	0	0.267418	0	0.719152	0	0	0	0	0	0	0	0	0
ENSG00000116918.13	TSNAX	4.94342	3.7799	0	2.48704	2.14314	4.62607	0	0.830878	2.4035	1.743	1.51292	2.47904	1.59753	0.72844	1.359	2.86688	3.46217	3.36009	2.63116	1.08092	1.44548	2.69943	0	0.691177	1.38541	0	2.58022	3.22168	2.46562	1.97013	0	2.38326	3.7993	3.33684	0.754201	2.93751	1.97323	1.73137	4.41512	1.09342	2.78013	2.71868	0	5.38781	1.61421	6.51441	1.98617	2.10277
ENSG00000270106.6	TSNAX-DISC1	0	0	0	1.88239	0.712794	1.21219	0	0	1.09786	1.09477	0.286956	0.24094	0.285577	0.560127	0.241586	1.49099	0	0	0	0.276051	0	0.357779	0.60789	0	0	0	0.596137	0.353169	1.0567	0	0.279556	0	0	0	0.239396	0	0	0	2.42165	0.506118	0.28164	0.192316	0	0	0.412543	1.41053	0	0
ENSG00000117472.9	TSPAN1	0	0	0	0	0	0	0	0	0	0	0	0	0	0	0.316699	0	0	0	0.811356	0	0	0	0	0	0	0	0	0.176584	0.352232	0	0	0	0	0	0	0	0	0	0	0.728946	0	0	0	0	0	0	0	0.34481
ENSG00000134198.9	TSPAN2	0	0	0	0	0	0	0	0	0	0	0	0	0	0	0	0	0	0	0	0	0	0	0	0	0	0	0	0	0	0	0	0	0	0	0	0	0	0	0.688377	0	0	0	0	0	0	0	0	0
ENSG00000143643.12	TTC13	2.8332	8.13826	0	2.41857	11.3787	2.97113	2.76394	2.94621	5.26936	1.17668	0.790169	4.47766	4.46948	6.35584	3.27628	9.25648	9.72071	8.37172	9.63373	1.44425	1.19328	8.9822	6.12026	8.28098	3.02674	2.51626	3.77249	7.36305	5.54264	4.57188	6.3612	3.30954	7.3279	13.2043	1.51581	5.92615	9.25601	5.80707	6.92994	6.71357	12.2236	7.90765	0.570742	4.36381	2.15171	17.5823	2.9912	3.84922
ENSG00000006555.10	TTC22	0	0	0	0	0	0	0	0	0	0	0	0	0	0	0	0	0	0	2.50901	0	0	0	0	0	0	0	0	0	0	0	0	0	0	0	0.239396	0.216034	0	0	0	0	0	0.278177	0	0	0	0	0	0
ENSG00000085831.15	TTC39A	0	0	0	0	0.224177	0	0	0	0	0	0	0	0.620102	0.168313	0	0	0	0	0.22612	0	0	0	0	0	0	0	0	0	0	0	0	0	0	1.04776	0	0	0	0	0	0	0	0	0	0	0	0.879427	0	0
ENSG00000116830.11	TTF2	0	0	0	0.673104	0	0.606096	0	0	0	0	1.15526	0	0.345927	0	0	0	0	0	0.582524	0	0	0	0	0.424084	0	0	0	0	0	0.280616	0	0	0	0	0	0	0	0	0.359576	0	0	0	0	0	0.808815	0.189599	0	0
ENSG00000162571.13	TTLL10	0	0	0	0	0	0	0	0	0	0	0	0	0	0	0	0	0	0	0	0	0	0	0	0	0	0	0	0	0	0	0	0	0	0	0	0	0	0	0	0	0	0	0	0	0	0	0	0
ENSG00000137941.16	TTLL7	0.812365	1.09461	1.1387	0.673104	0.224177	0.217621	0	0.276959	1.06822	0.547384	0.503213	0	0.691854	0.168313	0	0.332188	1.40957	1.20525	7.04059	0	0	0.434032	0.552789	1.80644	0	0.322986	3.07602	0	0	1.24013	0	0	0.269653	2.92298	0.257402	2.92637	4.41495	0	1.39214	0	0.443369	1.49951	0	0.350407	1.3643	1.11273	0.291488	0
ENSG00000143367.15	TUFT1	0.483388	0	0	0	0.401187	0	0	0	0	0	0	0	0	0.523889	0	0.302829	1.60892	0.422015	0.457664	0	0	1.02267	0	0	0	0	0.496832	0	0	0.229511	0.279556	0	0	0.377018	0	0	1.16202	0	0	0	0.28164	0.547144	0	0.350407	0	1.26464	0	0
ENSG00000084652.15	TXLNA	1.8163	0.919902	0.732677	1.34621	0.712794	1.89682	0	0.276959	0.548928	1.12838	1.91336	0.800829	1.38371	0.373972	2.77602	1.46783	1.33518	0.584363	2.40775	1.03373	2.02422	1.57437	0.994488	3.66294	0.583509	1.29745	1.19227	0.3276	3.35859	1.99087	0.559112	0	0.495578	1.31475	0	2.6112	0.714721	1.37959	4.05555	0.364473	0.862489	1.27739	0	2.29959	5.80551	2.27031	0.881966	0.655807
ENSG00000117862.11	TXNDC12	0	0	0	0	0	0	0	0.22942	0.861778	0	0	0	0.345927	0	0	0	0	0	0	0	0	0	0	0	0	0	0	0	0	0	0	0	0	0	0.27011	0.216034	0	0	0	0	0.56328	0	0	0	0	0	0	0.292993
ENSG00000265972.5	TXNIP	0	0	0	0	0	0	0.216125	0	0.594723	0	0	0	0	0	0	0	0	0	0	0.276051	0	0	0	0	0	0	0	0	0	0	0	0	0	0	0	0	0	0	0	0	0	0	0	0	0	0	0	0
ENSG00000162623.15	TYW3	0	0	0	0	0	0	0	0	0	0	0	0	0	0	0	0	0	0	0	0	0	0	0	0	0	0	0	0	0	0	0	0.252936	0	0	0	0	0	0	0	0	0	0.192316	0	0	0.267894	0	0	0
ENSG00000117143.13	UAP1	1.80123	0	1.22702	1.88239	0	0.474508	0	0.735799	0.53411	0	4.92201	1.19778	2.52602	0.729549	0.558285	0.937846	1.33931	0.422015	0.228832	0	0.786132	1.47254	0.552789	3.02862	1.16702	0.864969	0.297039	0.176584	1.15715	1.37707	0.838668	0	0	0.712388	1.01901	0.582353	2.98069	0.366884	2.06513	1.37671	1.16838	0	1.07307	0.863982	2.70719	0.183584	0.951215	0.689619
ENSG00000143569.18	UBAP2L	3.63154	3.21519	0.732677	3.16014	5.84601	4.04545	2.49688	2.20817	1.95964	2.96798	2.24311	2.75625	19.6322	4.97308	6.16158	5.26636	6.20537	8.32696	23.1877	2.02026	4.66299	5.17725	8.15835	5.78655	0	4.49604	2.68071	5.64033	4.41529	2.22038	3.05225	3.10578	4.80004	22.8824	4.26462	3.49759	5.41278	11.4822	4.10171	3.23685	10.5404	5.9639	1.54127	3.67715	8.78401	14.0036	3.94241	3.60375
ENSG00000160087.20	UBE2J2	6.98722	0.994326	0.732677	4.23251	1.29789	4.25556	0.969104	0.553919	2.16608	0	5.7796	1.11833	2.51461	3.8874	2.30909	1.84633	3.75966	5.84742	2.59504	1.67311	0.262044	3.95036	1.65748	8.498	0.692705	1.22431	1.19021	0.831783	4.92625	1.2194	0.547682	2.84938	5.21814	9.00344	1.0116	4.07334	0.878229	5.72934	12.3614	0.728946	2.86911	1.86355	1.07307	3.65308	8.08559	6.26827	1.54169	4.4194
ENSG00000160714.9	UBE2Q1	0	0	0	0	0	0	0	0	0	0	0	0	0	0	0	0	0	0	0.291262	0	0	0	0	0	0	0	0	0	0	0	0	0	0	0	0	0	0	0	0	0	0	0	0	0.350407	0	0	0	0
ENSG00000077152.10	UBE2T	0	0	0	0	0	0	0	0	0	0	0	0	0	0	0	0	0	0	0	0	0	0	0	0	0	0	0	0	0	0.250246	0	0	0	0	0	0	0	0	0	0	0	0	0	0	0	0	0	0
ENSG00000177414.13	UBE2U	0	0	0	0	0	0	0	0	0	0	0	0	0	0	0	0	0	0	0	0	0	0	0	0	0	0	0.297039	0	0	0	0	0	0	0	0	0	0	0	0	0	0	0	0	0	0	0	0	0
ENSG00000130939.18	UBE4B	3.64662	3.02019	2.62196	1.20929	3.7929	5.21837	0	0.45884	1.67776	1.67577	6.3	1.8426	2.10834	3.42036	1.67485	1.59064	4.0138	6.26542	9.05415	3.94551	6.50578	2.34929	2.33514	3.95189	1.16702	0.432484	4.26727	1.51255	5.29956	2.42916	0.279556	1.94745	2.02604	6.43171	3.04752	8.33906	1.99855	3.08209	8.26275	0.506118	3.30369	5.24721	0.856112	2.7891	4.97871	6.99499	0.859026	4.36538
ENSG00000160803.7	UBQLN4	0	0	0	0	0	0	0.320729	0	0	0	0	0	0	0	0	0	0	0	0.22612	0	0	0	0	0	0	0	0	0	0	0	0	0.298654	0	0	0	0.227166	0	0.183442	0	0	0	0	0	0	0	0	0	0
ENSG00000127481.14	UBR4	2.33579	0.306634	0.732677	0	0.936971	1.0806	0	0.506379	3.68319	2.80415	0.825518	1.6434	0.571154	0.523889	0.483172	1.50877	0.801624	1.49743	3.15126	0.78096	1.52746	1.87384	0.939387	2.23052	0.692705	0	2.77795	0.655199	1.91619	1.95903	0.279556	0	1.70163	2.78623	0.748903	2.07998	2.48756	4.68376	3.06914	0.364473	1.89549	0.73946	2.94572	1.28236	5.1285	2.51124	0.621351	0.621996
ENSG00000158062.20	UBXN11	0	0	0.732677	0	0	0.217621	0.255961	0	0	0	0	0	0	0	0	0	0.70762	0	0	0.228857	0.496763	0	0	0	0	0	0.298068	0	0	0	0	0	0	0	0	0.432068	0.292743	0	0	0	0	0	0	0	0	0	0	0
ENSG00000116750.13	UCHL5	1.05511	0.957114	0.406021	0.604644	1.78436	1.2059	1.6504	0	0.281873	0	0.538562	1.40245	1.32336	1.42064	1.359	0	1.76338	2.70669	1.487	0.228857	0.958564	4.32657	0.552789	1.43242	0.692705	0	2.78104	1.95602	1.00212	0.530862	0.279556	2.91396	1.03488	0	1.29442	2.26714	0.827579	0	3.8784	0	0.56328	2.76552	0	0.897968	1.075	1.06903	2.1401	0.982613
ENSG00000143179.15	UCK2	3.11205	2.25807	1.05933	1.20929	4.90903	3.23552	0.648374	0.968237	4.78105	1.162	4.98199	3.91632	0.856731	3.83113	2.08459	0.937846	2.75455	2.24815	3.3041	0	2.01438	0.868064	1.8168	1.40739	0.692705	0	1.78532	3.34713	9.08973	2.06271	4.71816	1.28951	3.28685	3.19503	0.797622	1.9777	6.28688	2.40473	8.34979	0	2.45667	0.845915	1.22177	1.85399	3.2267	1.45504	1.81774	4.50063
ENSG00000143222.11	UFC1	0	0	0	0	0	0	0	0	0	0	0	0	0	0	0	0	0	0	0	0	0	0	0	0	0	0	0	0	0	0	0	0	0	0	0	0	0.292743	0	0	0	0	0	0	0	0	0	0.276051	0
ENSG00000152332.15	UHMK1	0.527554	0.957114	0	0.673104	0.802374	0.217621	0	0.828636	0	0	0	0.318948	0.285577	0	0.559125	0.291251	0.263939	0	1.19574	0	0.262044	0	0	0	0	0	0	0	0.352232	0.229511	0	0	0.269653	0.528934	0.810329	0.355187	0	0.16834	0.688377	0	0.28164	0.278177	0	0.897968	1.34631	0.183584	0.552102	0.655807
ENSG00000173660.11	UQCRH	0	0.343846	0	0	0	0	0	0	0	0	0	0	0.285577	0	0	1.19974	0	0	0	0	0	0	0	0	0	0	0.298068	0	0.297656	0.280616	0	0	0	0.261939	0	0	0	0.33668	0	0	0	0.576948	0	0	0	1.69436	0	0
ENSG00000135763.9	URB2	0.270788	0.687692	0	0	0.401187	0	0	0.276959	0.53411	0	0.286956	0.318948	0.620102	0	0.558285	0	0	0	0.743501	0	0	0	0.331496	0	0.583509	0	0	0	0	0.459022	0	0.298654	0	0.680851	0	0.897532	0	0	0.567498	0	0.28164	0	0	0	0	0.189599	0	0
ENSG00000158773.14	USF1	0.483388	0	0	0	0	0	0	0	0	0	0	0	0	0	0	0	0.35381	0	0	0	0	0	0	0	0	0	0	0.353169	0	0	0	0	0	0	0	0	0	0	0	0	0	0	0	0	0.269605	0	0	0
ENSG00000042781.12	USH2A	0	0	0	0	0	0	0	0	0	0	0	0	0	0	0	0	0	0	0	0	0	0	0	0	0	0	0	0	0	0	0	0	0	0	0	0	0	0.33668	0	0	0	0	0	0	0	0	0	0
ENSG00000162607.12	USP1	2.40099	2.90855	2.86006	3.16014	4.5126	5.27143	0.864499	0	3.53233	1.67577	1.59106	3.24505	1.77381	6.11672	1.91812	2.51691	6.87216	3.10444	3.43438	0.528821	4.05693	1.91421	2.21027	5.86525	0.583509	4.86045	1.88684	3.08983	7.78126	3.07333	0.559112	2.05429	3.13255	3.72397	3.26891	6.07192	2.55871	2.98259	2.30383	1.45789	1.42577	4.95902	2.00947	3.97626	3.22499	6.58979	0.935778	1.80978
ENSG00000143258.15	USP21	0.541577	0	0	0	0	0	0	0	0	0	0	0	0	0	0	0	0	0	0	0	0	0	0	0	0	0	0	0	0	0	0	0.252936	0	0	0	0	0	0.50502	0.567498	0	0	0	0	0	0	0	0	0
ENSG00000162402.13	USP24	0	0.343846	0.494341	0.673104	0.802374	0	0	0	0	1.67577	0.860867	0.679634	0	0.561236	0.316699	0.873753	0.527878	0.422015	0.915328	0.552102	0	0.170444	0.331496	1.09023	0.583509	0.322986	1.68705	0	0.561837	0.280616	0.279556	0.429836	0.539305	0.717444	1.2277	0.659234	1.46372	0	0	0.87059	0.28164	0.470492	0	0	0.807103	0	0.605915	0.34481
ENSG00000077254.14	USP33	3.85325	10.6542	2.12738	6.788	3.21686	6.25971	2.49688	2.43984	4.8959	2.80415	6.78186	3.44281	6.11452	4.5077	3.35223	21.0206	4.11761	8.65566	17.9705	2.29695	8.79204	3.30391	1.54728	6.79489	0.583509	1.26066	13.1022	3.89047	10.7839	4.4504	3.61137	4.59905	5.25813	4.59333	7.4329	6.25908	2.0492	3.30951	9.56479	0.728946	1.88671	6.65434	4.48714	11.4597	6.88735	12.4163	0.605915	6.6237
ENSG00000090686.15	USP48	2.84827	2.22086	3.434	3.09168	7.67278	3.32034	2.89728	2.15986	2.41831	1.2103	3.70996	5.99149	1.32336	4.95193	1.28388	3.26165	3.21217	6.45228	14.285	1.46753	6.19808	2.44349	0.621676	10.5679	0.692705	6.7726	7.54308	2.25247	6.41083	4.57188	3.30895	2.33754	6.16662	7.81003	6.99431	6.06878	5.35539	8.19315	15.6231	0.728946	2.75588	7.57908	2.07788	10.1162	7.29305	12.4581	4.35696	3.01996
ENSG00000183520.11	UTP11	0	0	0	0	0	0	0	0	0	0	0	0	0	0	0	0	0	0	0	0	0	0	0	0	0	0	0	0	0	0	0	0.429836	0	0	0	0	0	0	0.359576	0	0	0	0	0	0	0	0	0
ENSG00000049245.12	VAMP3	10.5628	12.336	11.5111	12.1728	6.21598	7.24678	5.56772	8.927	5.16933	17.5621	10.0313	16.6697	3.20647	7.36794	8.93508	5.52825	16.3785	22.7855	7.54545	4.38895	13.5446	14.0146	6.25112	30.841	4.52135	12.5247	16.2724	10.4689	17.5842	12.6665	5.52254	7.96719	11.8731	5.95478	8.70929	14.8044	9.38786	6.61902	31.8449	7.34428	9.62733	8.93798	8.97429	20.0681	21.7388	7.68166	6.00576	10.9868
ENSG00000117533.14	VAMP4	0	0	0	0	0	0	0	0	0	0	0	0	0	0	0	0	0	0.292181	0	0	0	0	0	0	0	0	0.298068	0	0.352232	0	0	0	0	0	0	0	0	0	0.359576	0	0	0	0	0	0	0	0	0
ENSG00000173218.14	VANGL1	0	0.65048	0	0.604644	0.311608	4.7046	1.61056	0.506379	3.44443	0.547384	1.3041	0	0	2.00083	1.75081	0	2.05674	2.30494	1.71855	1.79078	3.40742	0.681777	0.310838	0.798098	1.16702	0.322986	0.893175	0.353169	0.859493	1.14756	0.279556	0	1.84384	1.76015	1.28912	1.7248	1.90207	2.23639	3.75752	0	0.28164	5.56085	0	3.45593	2.68407	1.25943	0	1.72405
ENSG00000134215.15	VAV3	0	0.406923	0	0	0.934823	0	0	0	0	0	0	0	0	0	0	0	1.42918	1.55823	0.873785	0.252769	0.741326	0.170444	0.310838	0	0	0	0	0	0	0.479757	0	0	0	0.340425	0.27011	1.94083	1.24956	0	0.719152	0	0	0	0.4682	0	0.53921	0.170753	0	0.310998
ENSG00000048707.14	VPS13D	2.82724	2.01452	1.47431	1.27775	2.54218	4.00497	0.969104	2.11534	1.91384	6.53164	4.68431	3.71857	6.21051	2.16803	3.01676	4.50383	7.56584	4.94259	6.22923	2.4075	3.38773	1.90762	1.50596	4.46104	0.583509	0.791825	3.37306	2.12703	8.7586	5.6336	3.87949	1.35611	1.30454	2.82307	4.87897	6.92178	2.16949	5.4655	3.19002	3.01402	0.725009	3.64124	2.3631	4.09553	7.73384	6.3633	1.90243	1.50098
ENSG00000136631.13	VPS45	0.505471	0	0.494341	0	0.224177	0.692129	0	0	0.53411	0.629299	0.286956	1.19778	1.87171	0.504939	0.483172	0.302829	2.91881	0.292181	3.34397	0	0.496763	1.4567	0.932515	0.424084	0	0.864969	0.7949	1.06351	0	0.688534	0.827238	0.859673	1.76118	0.942546	1.56453	0.798387	0.534836	1.02648	2.51175	0	0	0.576948	1.4046	0	0.269605	0.354337	0.276051	0
ENSG00000163159.12	VPS72	0.241694	0	1.14765	0.604644	0.802374	0	0	0	0	0	0	0.24094	0.285577	0.746836	0.950096	0.291251	0.617749	0	8.59649	0	0	0.986788	1.10558	0.424084	0	0	0	0.655199	1.2452	0.510128	0.547682	0	0.677776	0.94279	0	0	0.267418	0.676028	0.719152	0.364473	0.290425	0.470492	0.570742	0.700813	1.33947	1.10672	0	0.310998
ENSG00000134258.16	VTCN1	0	0	0	0	0	0	0	0.414318	0	0	0	0	0	0	0.558285	0	0.35381	0	0	0	0	0	0	0	0	0	0	0.353169	0	0	0	0	0	0	0	0	0	0.16834	0	0	0	0	0	0	0	0.549952	0	0
ENSG00000116874.11	WARS2	0	0	0	0	0	0	0	0	0	0	0	0	0	0	0.316699	0.664375	0.263939	0	0	0	0	0	0	0	0	0	0	0	0	0	0	0	0	0	0	0	0	0	0	0	0	0	0	0	0.267894	0	0	0
ENSG00000158195.10	WASF2	0	0	0	0	0.535785	0.435243	0.432249	0	0	0	0	0	0.345927	0.168313	0.241586	0	0.263939	0.584363	0	0.252769	0.262044	0.493394	0.331496	0	0	0	0	0.176584	0	0.781108	0	0.252936	0	0.340425	0.27011	0.227166	0.267418	0	0.703765	0	0	0	0	0	0.808815	0.740351	0	0
ENSG00000162923.14	WDR26	0.754177	1.02019	1.05933	1.27775	2.94551	3.27479	0.255961	1.24218	1.06822	1.70938	0.800889	0.559888	1.59753	0.729549	1.74997	1.29939	1.6735	0.584363	2.88902	0.252769	0.966201	1.1327	3.18498	4.3259	0	0.468839	1.48828	1.2401	2.75458	0.781108	0.559112	0.850243	0.721503	2.174	1.02431	1.0913	0.852904	0.535223	4.27886	0.364473	2.30583	0.748669	0.97053	0.513576	2.02333	4.74432	0.912839	0.655807
ENSG00000065183.15	WDR3	0	0	0	0	0	0.217621	0	0	0	0	0	0.24094	0	0.186709	0	0	0	0	0.228832	0	0.262044	0	0	0	0	0	0	0.533761	0	0	0	0.252936	0	0	0	0	0.852904	0	0	0	0	0	0	0	0.269605	0	0	0
ENSG00000085433.15	WDR47	0.241694	0.613268	0	0.673104	1.20832	2.08268	0.255961	0.873158	0.281873	3.01628	0.286956	0.637895	0.345927	0.915148	1.11825	0.605658	1.2355	0.584363	1.20117	0.276051	0.262044	0.246697	0	0.399049	0	0.645973	0.7949	0.443465	1.80704	1.43927	0.838668	0.682772	1.10652	0.261939	0	0.582353	0.714721	0.16834	0.688377	0	1.00665	0.470492	0.4682	1.08521	1.36087	0.341506	0.567539	0.896985
ENSG00000162643.12	WDR63	0	0	0	0	0	0	0	0	0	0	0	0	0	0	0	0.332188	0	0	0	0	0	0	0	0	0	0	0	0	0	0	0	0	0	0	0	0	0	0	0.344189	0	0	0	0	0	0	0.183584	0	0
ENSG00000162843.17	WDR64	0	0	0	0	0	0	0	0	0	0	0	0	0	0	0	0.302829	0	0	0	0	0	0	0	0	0	0	0	0	0	0	0	0	0	0	0	0	0	0	0	0	0	0	0	0	0	0	0	0
ENSG00000116455.13	WDR77	0	0	0	0	0	0.513773	0	0	0	0	0	0	0	0	0	0	0	0	0	0	0	0	0	0	0	0	0	0	0	0	0	0	0	0	0	0	0	0	0	0	0	0	0	0	0	0	0	0
ENSG00000152763.16	WDR78	0.527554	4.10346	1.80072	1.20929	6.24335	1.30573	3.18509	0.553919	11.518	1.7913	2.5826	0	0	0.187263	1.44951	1.91125	5.10878	3.87141	32.8269	3.70174	9.7058	6.24134	1.9692	26.0615	0.692705	2.19834	4.75879	4.60082	2.46562	1.73099	4.4386	1.26468	1.84384	8.43237	9.81725	5.1556	4.11478	14.2943	12.9443	1.09342	1.00665	11.1323	12.5252	32.0708	5.2877	16.4123	0.881966	3.18901
ENSG00000142784.15	WDTC1	0	0	0	0	0.311608	0	0	0	0	0	0.400444	0	0	0	0	0	0	0	0.291262	0	0.479282	0.246697	0	0	0	0	0	0	0	0	0	0.298654	0	0.340425	0	0	0	0	0.344189	0	0	0	0.285371	0	0	0	0	0
ENSG00000215861.5	WI2-1896O14.1	0	0	0	0	0	0	0	0	0	0	0	0	0	0	0	0	0	0	0	0	0	0	0	0	0	0	0	0	0.297656	0	0	0	0	0	0	0	0	0.16834	0	0	0	0	0	0	0	0	0	0
ENSG00000116729.13	WLS	0	0	0	0	0	0.776948	0	0.22942	0	0.581	0.251606	0	0	0.355576	0	0	0	0	0.22612	0	0	0	0	0.292128	0	0.322986	0	0	0	0	1.09536	0	0.269653	0	0	0	0	0.16834	0	0	0	0	0	0	0.680436	0	0.605915	0
ENSG00000143816.7	WNT9A	0	0	0	0	0	0	0	0	0	0	0	0	0	0	0	0	0	0	0	0	0	0	0	0	0	0	0	0	0	0	0	0	0.225925	0	0	0	0	0	0	0	0	0	0	0	0	0	0	0
ENSG00000116213.15	WRAP73	0	0	0	0	0	0	0	0	0	0	0	0	0	0	0	0	0	0	0	0.228857	0	0	0	0	0	0.468839	0	0.3276	0	0	0	0	0	0	0	0	0	0	0	0	0	0	0	0	0.267894	0	0	0
ENSG00000143324.13	XPR1	1.20847	2.38423	0	0	2.45475	2.41809	0.255961	2.20817	0.548928	1.12838	1.00643	0.24094	1.47683	0.374527	0.241586	1.17658	10.139	0.292181	1.36757	2.52706	1.04818	2.23982	5.60192	0.798098	4.88646	0.937678	3.67525	0.973217	1.70658	0.989885	2.78413	0.597308	0.539305	0.717444	1.52641	3.45411	1.34191	0.67336	8.23197	0	2.15956	1.29581	0.97053	3.90829	2.68578	2.28315	1.57257	2.81039
ENSG00000134684.10	YARS	0	0.919902	1.55367	1.81393	0.535785	0.692129	0	0.643738	3.69801	0.629299	1.86729	0.559888	0.691854	0.710598	0	0.937846	2.12286	0.913069	2.94602	0.252769	0.976045	0.170444	1.51975	0.876384	0.692705	0.322986	0.496832	0.504184	1.29978	1.53038	0.559112	0	1.30454	0.717444	0.496798	3.1278	0.560161	1.7136	3.39794	0.728946	0.28164	1.36325	1.54127	0.897968	3.4946	1.94845	0.329864	0.930796
ENSG00000065978.18	YBX1	0	0	0	0	0	0.776948	0	0	0	0	0.251606	0	0	0.186709	0	0.332188	0	0	0	0	0	0	0	0	0.692705	0	0	0	0	0	0	0	0	0	0	0	0.292743	0	0	0	0	0	0	0	0.412543	0	0.276051	0
ENSG00000058799.14	YIPF1	0	0	0	0	0	0.256886	0	0.414318	1.41071	0	0	0	0	0	0.875824	0	0	0.876544	0.291262	0	0	0.187335	0.331496	0.292128	0	0.901323	0	0	0.561837	0.750738	0	0	0	0	0	0	0	0.67336	0	0	0	0	0	0.350407	0.412543	1.30835	0	0.585987
ENSG00000196449.3	YRDC	0	0	0	0	0.401187	0	0	0	0	0	0	0	0	0	0	0	0	0	0	0	0	0	0	0	0	0	0	0	0	0	0	0	0	0	0	0	0	0	0	0	0	0	0	0	0	0	0	0
ENSG00000198492.15	YTHDF2	7.24907	4.09769	4.58165	0	6.828	6.6077	1.12046	1.332	4.12571	8.19273	4.98199	3.83976	2.28939	0.878357	2.47472	3.74601	6.22085	2.83252	9.63292	0.78096	0.976045	2.54588	2.38337	0	1.75053	0.645973	2.68071	0.706337	4.38549	12.0319	1.95689	2.0692	0.225925	0.450448	4.08453	8.53317	2.52444	0.33668	1.04795	0.364473	2.55233	4.23523	0	3.45593	5.95358	1.99296	4.30263	1.22379
ENSG00000163374.19	YY1AP1	5.08276	6.98932	9.63974	3.83324	7.18156	6.44853	2.98007	1.79386	3.56197	12.4236	11.3345	3.84121	1.94346	3.85396	5.02792	8.29547	7.2177	10.6036	7.56611	1.67374	15.1003	2.59655	7.16298	6.63471	3.61025	7.56399	7.74391	5.98391	4.49464	3.56272	9.92685	6.35814	8.9858	5.53612	2.06663	4.3506	6.29101	12.5616	4.30963	5.62579	7.60525	7.47966	7.86693	11.8311	15.1253	11.7369	2.82226	2.17259
ENSG00000185278.15	ZBTB37	0	0	0	0	0	0	0	0	0	0	0	0	0	0	0	0	0	0	0	0	0	0	0	0	0	0	0.594077	0	0	0	0	0	0	0	0	0	0	0	0	0	0	0	0	0	0	0	0	0
ENSG00000184677.16	ZBTB40	2.48319	0.306634	0.494341	0	0.535785	1.38426	0	0	3.05883	1.162	0.754819	0.722821	0.917081	0.168313	0	1.87032	3.68941	0	1.95009	0.276051	0.469438	0.246697	1.19512	3.7949	0.692705	0	1.39104	0	2.95178	1.2705	0.279556	1.18864	0.56721	1.16789	1.05502	0.355187	0.827579	2.25283	2.63263	0	1.45212	0.278177	0.4682	1.02715	0.805392	3.47808	0	0.637803
ENSG00000177888.7	ZBTB41	0.534565	0.994326	0.900362	0	0.934823	0.217621	0	0.276959	0	0	0.251606	0.318948	0.345927	0.187263	0.241586	0.908487	0	0.913069	0.228832	0	1.44548	0.170444	1.32598	1.24722	0	0	0	0.504184	0.595312	0	1.09536	0.551589	0.341285	0	0	0.227166	0.447303	0	0.359576	0	0	0	0.285371	0.513576	0.53921	0.568798	0.276051	0.310998
ENSG00000176261.15	ZBTB8OS	0	0.343846	0	0.604644	1.24643	0.645361	0	0.920698	0.267055	0	0	0	0	0.916258	0	0.664375	0.273746	0.714196	3.99873	0.252769	0	0.621366	0.932515	2.47258	0	1.37016	0.298068	0	2.00424	2.93493	0	0.298654	1.85592	0.340425	0.993597	2.39516	0	0.550325	0.344189	1.77895	0.580849	0.470492	0	2.27553	1.88039	2.18778	0.276051	0.292993
ENSG00000058673.16	ZC3H11A	0.270788	3.54192	0.988682	0.673104	2.41188	0.513773	1.21815	0.691278	1.73837	1.2586	2.47655	1.04177	0.905678	0.729549	0.483172	1.165	1.07537	2.54033	2.30107	1.46753	2.9653	3.78097	2.83195	2.25556	0	0.937678	3.47134	2.8118	1.59743	2.08198	0.559112	0	0.808958	2.26235	0.54022	1.00329	0.267418	0.366884	8.12648	0	0.871274	1.48813	2.44339	1.9152	1.63048	1.97332	0.276051	2.17479
ENSG00000163874.10	ZC3H12A	0	0	0	0	0	0	0	0	0	0	0	0	0	0	0	0	0	0	0	0	0	0	0	0	0	0	0	0	0	0	0	0	0	0.188509	0	0	0	0.16834	0	0	0	0	0	0	0	0	0	0
ENSG00000134744.13	ZCCHC11	14.1781	13.8808	5.32305	11.899	10.2552	12.702	3.98901	3.30998	21.3768	4.4463	6.05583	11.3995	6.77027	10.1507	7.63747	16.72	21.1547	18.9263	21.1473	13.0616	9.22652	4.31683	8.75849	25.4336	3.24513	8.25312	14.5871	6.28995	16.3477	11.1308	4.96343	9.80483	5.7258	8.75763	7.67438	14.8145	9.28326	10.6281	27.2583	4.89684	6.3542	16.481	4.88708	7.09594	9.84445	12.0027	6.4737	9.97476
ENSG00000121766.15	ZCCHC17	2.02188	4.04913	2.12738	6.85646	6.83014	4.08471	3.26788	0.22942	3.369	2.22315	3.61047	1.9206	1.72964	4.26303	1.0423	1.27003	4.98122	4.25266	10.418	2.29695	4.64551	2.64771	3.26766	0	1.85972	1.33381	4.17002	1.18495	5.67289	3.98027	0.559112	0.429836	1.94338	7.00784	1.03702	3.20468	1.00746	4.16364	5.64551	0.364473	1.71619	3.58301	1.90693	5.75236	4.02867	4.8826	0.621351	2.8464
ENSG00000204160.11	ZDHHC18	0	0	0	0	0	0	0	0	0	0	0.251606	0	0	0	0	0	0	0	0	0	0	0	0	0	0	0	0	0	0	0	0	0	0	0	0	0	0	0	0	0	0	0	0	0	0	0	0	0
ENSG00000187801.14	ZFP69B	0	0	0	0	0	0	0	0	0	0	0	0	0	0	0	0	0	0	0	0	0	0	0	0	0	0	0	0	0	0.250246	0	0	0	0	0	0	0	0	0	0	0	0	0	0.513576	0	0	0.659727	0
ENSG00000157077.14	ZFYVE9	0.241694	1.50154	0.988682	0	1.02655	0.256886	0	0	0.53411	0	0.251606	0.318948	0.905678	0.915703	0.483172	1.24067	1.52886	0	0.808643	0.78096	0.234719	0.170444	0.60789	1.1403	0.583509	0	1.09194	0.3276	0	0	0	0	0	0.377018	0.527512	0	0	0.338014	1.06334	0	0	0.278177	0	0	0.537499	3.94583	0.951215	1.5708
ENSG00000084073.8	ZMPSTE24	0.791331	0.957114	1.14765	0.604644	0.759961	1.77152	0	0	2.96724	2.29038	0	0.800829	0.285577	0.373418	0.483172	0.926268	0.273746	0.620888	1.78098	0.552102	1.40831	0.374669	0.994488	1.00834	1.38541	0.645973	0.893175	1.86572	0.649888	1.24977	0.547682	0.252936	0	1.24132	1.25841	0.571221	1.41307	1.6874	1.03257	0	1.00665	1.00843	0	0.700813	1.07671	1.09389	0	0.34481
ENSG00000197056.9	ZMYM1	2.52736	0.406923	0	1.27775	0.224177	0	0	0	3.14908	1.162	0.251606	0.956843	0	0.935208	0.483172	2.58721	1.41937	0	0.972333	0.710484	1.02085	0	0.621676	0	0	0	0.892145	0.710345	0	0	0.279556	0	0.269653	0	0.754201	1.29273	0.447303	0.338014	0.688377	0	1.02422	0	0	2.01716	0	0.556767	0.659727	1.65642
ENSG00000146463.11	ZMYM4	16.2874	16.9501	12.9056	10.222	14.1446	19.5042	12.179	9.29981	14.0091	13.57	19.2019	16.99	7.31861	9.98852	12.9378	35.09	28.4649	31.1084	20.609	9.13807	9.17102	10.6431	17.6564	10.4141	9.40781	10.4037	17.6737	13.1928	17.908	11.0893	10.275	10.7614	21.5608	7.94509	9.69229	16.0157	14.0095	11.9255	18.4412	4.35295	8.20577	22.7686	6.76996	10.875	28.4644	15.9012	6.99484	20.3597
ENSG00000163867.16	ZMYM6	0	0	0.326655	0	0	0	0	0	0	0	0	0.318948	0	0	0	0	0	0.292181	0	0	0	0	0	0	0	0	0	0	0	0	0	0	0	0	0	0	0.534836	0	0	0	0	0	0	0	0	0	0	0
ENSG00000196418.12	ZNF124	4.71575	4.075	2.45404	6.18336	3.26142	2.80028	2.46503	1.42708	3.30973	2.4206	5.55262	1.16151	2.46567	0.746836	3.7432	1.47941	1.41524	1.88693	1.58284	2.59628	1.80698	4.53739	3.71623	3.07869	1.38541	3.13138	5.6583	5.12255	2.54498	0.980249	2.48171	1.75563	6.09979	0.712388	1.9946	2.10572	1.63465	1.45243	6.11762	0	2.17503	1.49734	0.285371	2.42878	4.73565	4.37715	3.44361	2.67285
ENSG00000162664.16	ZNF326	0	0	0	0	0	0	0.216125	0	0.281873	0.547384	0.503213	0.679634	0	0	0.559125	0.332188	0.891495	0	0	0	0.524088	0.187335	0	0.292128	0	0	0.298068	0.655199	0	0.500492	0	0	0	0	0.27011	0.648101	0	0	0.688377	0	0	0	0	0	0.682148	0	0	0
ENSG00000160094.14	ZNF362	1.01795	3.3899	1.79201	3.02322	0.802374	1.64115	1.44119	3.45337	0	3.41877	1.58034	3.67683	0.691854	3.40197	1.11657	6.66927	10.8074	1.46091	2.46747	0	8.63352	2.30023	0.829183	6.93002	0.583509	1.33381	4.1659	5.33673	2.19274	2.63358	0.559112	1.44755	1.34826	0.523879	1.83994	1.46875	1.75646	7.93553	13.4247	0	0	1.48813	2.79717	0.350407	1.3643	16.6484	1.54169	1.53698
ENSG00000162714.12	ZNF496	0	0.306634	0.326655	0	0	0.474508	0.320729	0	0.548928	0	0	0.24094	0	0	0.241586	0	1.15543	0	0.228832	0	0	0.511333	0	0	0	0	0	0	0	0	0.279556	0.597308	0	0.261939	0	0.227166	0	0.521456	0.359576	0	0	0.384632	0	0	0	0.170753	0	0
ENSG00000122482.20	ZNF644	3.02477	1.22077	0.406021	1.81393	11.6899	7.41763	0	2.02328	3.27875	0	1.3041	2.47212	0.691854	0.746836	5.5153	4.0844	3.99418	3.09218	1.19574	3.81041	0.731482	0.170444	0.898071	3.95826	0	5.40243	1.68808	0.680768	0.649888	0.959514	0.547682	1.9077	0.808958	0.827467	0	3.68023	1.60933	0.703563	2.19834	3.98848	1.89549	1.21916	0.502331	2.56472	7.19121	0.905089	0	2.2086
ENSG00000171161.12	ZNF672	0.241694	0	0	0	0	0	0	0	0	0	0	0	0	0	0	0	0.263939	0	0	0	0	0	0	0	0	0	0	0	0	0.280616	0	0	0	0	0	0	0	0	0	0	0	0	0	0	0.269605	0	0	0
ENSG00000181450.17	ZNF678	0	0	0.326655	0	0	0.435243	0.864499	0	0.53411	0	0	0.438693	0	0	0	0	0	1.20525	0	0	0	0	0.276394	0.584256	0	0	0	0	0	0	0	0	0	0	0	0.571221	0	0	0	0	0	0	0	0	0	0.367168	0	0.87898
ENSG00000117010.15	ZNF684	0	0.406923	0	0	0.311608	0.217621	0	0	0	0	0	0.637895	0	0.187263	0	0	0	0	0.873785	0	0.262044	0	0.331496	0	0	0	0	0	0.297656	0	0	0	0	0	0	0	0	0	0.719152	0	0	0	0	0.384392	0	0.183584	0	0
ENSG00000143373.17	ZNF687	0	0	0	0	0	0	0	0	0	0	0	0	0	0	0	0	0	0	0	0.552102	0	0	0	0	0	0	0	0	0	0	0	0	0	0	0	0	0	0.183442	0	0	0	0	0.502331	0	0	0	0	0
ENSG00000164011.17	ZNF691	0	0	0.494341	0	0	0	0	0	0	0	0	0	0	0	0	0	0	0	0	0	0	0	0	0	0	0	0	0	0	0	0	0	0	0	0	0	0	0	0	0	0	0	0	0	0	0	0	0
ENSG00000171163.15	ZNF692	0	0	0	0	0	0.870486	0	0	0	0	0	1.31608	0	0.374527	0	0	0	0	0	0	0.496763	0.170444	0	0	0	0	0	0	0	0.280616	0	0	0	0	0	0	0	0	0.344189	0	0	0	0	0	0	0	0	0
ENSG00000197472.14	ZNF695	0	0	0	0	0.224177	0	0.216125	0	0	0	0.400444	0	0	0	0	0	0	0	0	0	0	0	0	0	0.692705	0	0	0	0	0	0	0	0.269653	0	0	0	0	0.50502	0.359576	0	0	0	0	0	0	0	0	0
ENSG00000117174.10	ZNHIT6	0	0	0	0	0	0	0	0	0	0	0	0.438693	0	0	0	0	0	0	0	0	0	0	0	0.424084	0	0	0	0	0	0	0	0	0	0	0.257402	0	0.267418	0	0	0	0	0	0	0	0.269605	0	0	0
ENSG00000132485.13	ZRANB2	0	0	0	0	0	0	0.216125	0	0	0	0.251606	0	0	0	0	0	0	0.292181	0	0	0	0	0	0	0	0	0.298068	0	0	0	0	0	0	0	0	0	0	0	0	0	0	0	0	0	0	0	0	0
ENSG00000121903.14	ZSCAN20	0	0	0	0	0	0	0	0	0	0	0	0	0	0	0	0	0	0	0	0	0	0	0	0	0	0	0.298068	0	0	0	0	0	0	0	0	0	0	0.366884	0	0	0	0	0	0	0	0	0	0
ENSG00000162415.6	ZSWIM5	0.263777	0	0	0	0	0.862982	0.472086	0.506379	0	0	0	0	0.345927	0.355576	0	1.57907	1.34912	0.714196	2.07224	0.804872	0.262044	1.03851	0	0.424084	0	0	0	0.706337	0	0.280616	0	0	0	0.261939	0.54022	0.227166	0.585486	0.676028	0	0	0.56328	1.12409	0.4682	0	0	0.556767	0	0.655807
ENSG00000203995.9	ZYG11A	4.66457	0	2.04801	0	0	0	0	1.51991	2.22669	0	0.538562	0.481881	0	0.186709	0	0	1.06143	0	2.82659	0.481627	1.47281	1.43876	0	2.89348	0.692705	0	0	1.30082	3.24074	2.84235	0.279556	0	2.12078	1.31475	0.27011	1.57451	0	0.183442	2.67879	0.506118	0	1.74789	0	1.50358	3.66407	1.07504	1.2427	0
ENSG00000162378.12	ZYG11B	0	0.406923	0	0	0.401187	0.513773	0.320729	0	0	0.581	0	0	0.631504	0	0	0	0.35381	0	0	0	0	0	0	0	0	0	1.19227	0.655199	0.297656	0	0.559112	0	0	0.188509	0	0	0.447303	0	0.911687	0	0	1.40227	0.856112	0	0.412543	0.183584	0	1.50098
ENSG00000036549.12	ZZZ3	2.81918	2.34702	2.45427	5.31638	10.3295	18.3364	1.43427	3.68279	15.0204	10.8667	9.51418	4.887	7.14897	4.6554	4.05822	5.6279	18.1429	7.09342	10.7635	5.23327	7.36404	0.808701	5.12577	13.0083	5.57917	8.78916	8.93324	5.0547	5.31196	4.97979	1.66591	2.16064	6.87605	7.45323	6.33124	6.88282	6.38336	6.19794	7.96166	9.91264	6.56346	7.34992	5.37739	6.40504	5.56244	5.95242	2.4999	1.50098
ENSG00000023839.10	ABCC2	0	7.81451	0	0	0	0	0.255961	0	0.876596	0	0	0	3.82657	1.62741	8.32129	0	0.35381	9.84866	12.6829	0.528821	0	1.97623	0	0	0	0	0.298068	0	1.59743	1.90793	0	3.87998	0	5.58307	0	3.46872	2.57509	1.91481	0	0.364473	4.37641	2.84217	2.32897	0.350407	0.680436	0.183584	0	0.310998
ENSG00000136754.17	ABI1	0.812365	0.306634	1.05933	0	2.14053	0.870486	0	0	0.801166	0.629299	0.860867	0	0.285577	0.187263	0.316699	1.84633	0.617749	2.17911	1.84341	0	4.11073	0.77492	0.60789	0	0.583509	2.19327	1.78532	0	0	0	0.279556	0	0.225925	1.54515	0.478793	0.216034	0.852904	0.873237	0	0.728946	0.725009	3.57162	0.285371	0.700813	0.807103	3.07402	0.859026	1.50098
ENSG00000099204.18	ABLIM1	0	0.813846	0	0	1.86965	0.217621	0.969104	0	0	0	0	0.559888	0	3.15954	1.50922	0	0.35381	3.96873	0	0.457715	4.7526	0.962255	0.276394	1.1403	0	0	0	1.662	1.29978	1.2194	0	0.682772	0.269653	2.85966	0	0.571221	0	0.676028	0	0.364473	1.12656	0.470492	0	0	0.267894	2.04189	0.935778	2.00123
ENSG00000196177.12	ACADSB	0	0	0	0	0	0	0	0	0	0	0	0	0	0	0	0.291251	0	0	0.520094	0	0	0	0	0	0	0	0.297039	0	0	0	0	0	0	0	0.257402	0	0.267418	0	0	0	0.290425	0	0	0	0	0.367168	0	0
ENSG00000107897.18	ACBD5	0.270788	0	0	0	0.936971	0.388474	0	0	0	0	0	0.24094	0.631504	0	0.559125	0	0	0	0	0	0.234719	0.170444	0.331496	0	0	0.937678	0.297039	0.796633	0.352232	0.280616	0.547682	1.28951	0.225925	0	0.27011	0.216034	0.585486	0.351782	0.703765	0	0	0.268967	0.4682	0	0	0.733536	0	0
ENSG00000197142.10	ACSL5	0	0	0	0	0	0	0	0	0	0	0	0	0	0	0	0	0	0	0	0.276051	0	0	0	0	0	0	0	0	0	0	0	0	0	0	0	0	0	0	0	0	0	0	0.4682	0	0	0	0	0
ENSG00000173124.14	ACSM6	0	0	0	0	0	0	0	0	0	0	0	0	0	0	0	0	0	0	0.748926	0	0	0	0	0	0	0	0	0	0	0	0	0	0	0	0	0	0	0	0	0	0	0	0	0	0	0	0	0
ENSG00000138107.12	ACTR1A	0	0.613268	0	0	0	0.776948	0	0.276959	1.06822	0	0.251606	0.318948	0	0.373418	0	0	0	0.422015	0.457664	0	0.496763	0.374669	0.552789	0	0	0	0.298068	0	0	0.459022	0	0.252936	0	0.188509	0	0.216034	0.982139	0.366884	0.344189	0	0.290425	0	0	1.76195	0.535787	0.734336	0.276051	0
ENSG00000148848.14	ADAM12	0.241694	0	2.12738	0	0	0	0	0	0	0	0	0	0	0	0.241586	0.291251	0	0	0	0	0	0	0.331496	0	0	0	0	0	0.595312	0	0	0.935708	0.341285	0.450448	0	0.227166	0	0	0	0	0	0.192316	0.4682	0	0	0	0	0
ENSG00000151651.15	ADAM8	0	0	0	0	0	0	0	0	0	0	0	0.24094	0	0.187263	0	0	0	0	0	0	0	0.340888	0	0	0	0	0	0	0	0	0	0	0	0	0	0	0	0	0	0	0	0	0	0	0	0	0	0
ENSG00000138316.10	ADAMTS14	0	0	0	0	0	0	0.864499	0	0	0	0	0	0	0.523889	0.241586	0.59408	0	0	0	0	0	0.170444	0	0	0	0	0	0	11.9163	0	0	0	0.225925	0.188509	0	0	0	0	0	0	0.28164	0	0	0.768784	0.412543	0	0	0
ENSG00000185736.15	ADARB2	0	0	0	0	0	0	0	0	0	0	3.05791	0	0.620102	0	0	0	0	0	1.59369	0	0	0	0	0	0	0	0	0	0	0	0	0	0	0	0	0	0	0	0	0	0	0	0	0	0.267894	0	0	0
ENSG00000148700.14	ADD3	1.05511	1.53317	0.732677	0.673104	2.27513	2.25474	0.648374	0.553919	4.14187	0.547384	0	1.44564	0	1.06617	0	2.42884	0.70762	2.14259	0.291262	1.2865	0.496763	0	0.953173	8.33741	0.583509	0.645973	4.56755	0	4.76752	0.479757	0	0.252936	0.269653	1.57669	0.257402	0.432068	0	1.19482	2.18295	0.364473	1.13534	0.192316	0.502331	0.350407	1.36258	3.4841	0	4.03858
ENSG00000156110.13	ADK	3.37583	1.02019	0	0	3.4925	2.53589	4.52586	1.33502	1.06822	0.547384	3.10398	5.43305	6.66431	2.14908	2.79226	2.55785	5.07109	2.85679	3.2734	6.194	4.06677	3.38225	0.552789	3.58106	3.13594	1.87028	3.87195	2.84695	3.24944	8.08349	1.39778	2.63619	5.23502	6.25356	4.59085	1.65139	14.4699	3.1687	11.0747	2.8346	2.33676	3.31267	5.17245	3.74512	1.21622	4.50941	3.73561	5.07301
ENSG00000169129.14	AFAP1L2	0	0	0	0	0	0.652864	0	0	0	0	0	0.559888	0	0	0	0.302829	0	0	0	0.986536	1.21076	0	0	0	0	0	0	0	1.21173	0	0	0	0	0	0	0	0	0	1.42292	0	0	0	0	0	0	0.752382	0.621351	0
ENSG00000172650.13	AGAP5	0	0	0	0	0	0	0	0	0.594723	0	0	0	0	0	0	0	0	0	0	0	0	0.187335	0	0	0	0	0	0	0.352232	0	0	0	0	0	0	0	0	0	0.688377	0	0	0	0	0	0	0	0.276051	0
ENSG00000204149.10	AGAP6	0	0	0	0	0.311608	0	0	0	0	0	0.503213	0	0	0	0	0	0	0	0	0	0	0	0	0	0	0	0	0	0.352232	0	0	0.505871	0	0	0	0	0	0	0	0	0.290425	0	0	0	0.269605	0	0	0
ENSG00000204172.12	AGAP9	0	0.306634	0	0	0	0	0	0	0	0	0	0	0	0.186709	0	0	0	0	0	0	0	0	0	0	0	0	0	0	0	0	0	0	0	0	0	0	0	0.351782	0	0	0	0	0	0	0	0	0	0
ENSG00000042286.14	AIFM2	0	0	0	0.604644	0	0	0	0	0	0	0	0.318948	0	0	0	0	0	0	0	0	0	0	0	0	0	0	0.993664	0	0	0	0	0	0	0	0	0	0	0	0	0	0	0	0	0	0	0	0	0
ENSG00000187134.13	AKR1C1	0	0	0	0	0	0	0	0	0	0	0	0	0.285577	0	1.19252	0	0	0.422015	0	0	0	0	0	0	0	0	0	0	0	0.250246	0	1.02714	0	0	0	0.710375	0	0	0	0	0.290425	0	0	0	0	0	0	0
ENSG00000151632.17	AKR1C2	0	0.343846	0	0	0	0	0	0	0	0	0	0	0	0	0.483172	0	0	0	1.45631	0	0	0	0	0	0	0	0	0	0	0.781108	0	0	0	0	0	1.01442	0.267418	0	0	0	0.290425	0	0	0	0	0.341506	0	0
ENSG00000196139.13	AKR1C3	0	0	0	0	0	0	0	0	0	0	0	0	0	0	0	0	0	0	0.457664	0	0	0	0	0	0	0	0	0.26688	0.352232	0	0	1.61848	0	0	0	0.227166	0	0	0	0	1.01543	0	0	0	0	0	0	0
ENSG00000264006.7	AKR1CL1	0	0	0	0	0	0	0	0	0	0	0	0	0	0	0	0	0	0	0.228832	0	0	0	0	0	0	0	0	0	0	0	0	0	0	0	0	0	0	0	0	0	0	0	0	0	0	0	0	0
ENSG00000165568.17	AKR1E2	0	14.8896	0	0.673104	0.401187	1.42352	1.94512	6.9535	0.876596	0.581	1.33945	0.24094	1.53718	15.7669	20.2406	1.50257	1.67918	4.3217	6.5992	0	2.99042	11.6586	1.22957	3.26708	1.85972	0	1.78532	0.680768	13.4381	11.7899	0	1.44755	6.84919	8.05005	5.85245	0.227166	5.65969	6.25213	9.67028	4.06966	0	6.63592	6.66757	12.1673	0	4.80721	3.5358	2.46558
ENSG00000233515.1	AL022344.4	0	0	0	0	0	0	0	0	0	0	0	0	0	0.186709	0	0	0	0	0.22612	0	0	0	0	0	0	0	0	0	0	0	0	0	0	0	0	0	0	0	0	0	0	0	0	0	0	0	0	0
ENSG00000059573.8	ALDH18A1	1.28173	0	0	0.673104	0.311608	0	0	0.783339	0	1.2103	0.251606	1.51528	0.571154	1.59006	0	0.996563	0.527878	0	0.457664	0.228857	0.496763	0.698667	0.97383	0	0.583509	1.40652	0.891116	0.796633	0.859493	0.730003	1.39778	0	0.269653	0.717444	0	0.787255	1.41307	0.689796	0.344189	0.728946	0.862489	0	0	0.897968	0.535787	1.74602	0.881966	0
ENSG00000166295.8	ANAPC16	0	0	0	0	0	0	0	0	0	0	0	0	0	0	0	0	0	0.422015	0	0	0	0	0	0	0	0	0	0	0	0	0	0	0	0	0	0	0	0	0	0	0	0	0	0	0	0	0	0
ENSG00000151150.21	ANK3	0.798342	0.306634	0	0	1.24858	1.46279	1.41626	2.44061	0	0	0.251606	0	1.52578	0.74739	0.483172	0	6.30505	2.63364	5.58157	2.97515	0.741326	1.19206	1.24335	0	0	0.322986	0	4.3795	2.40235	1.07136	0.547682	0.505871	0	4.36292	2.27742	0.454332	0	1.73004	0	4.28686	0.572065	1.23976	1.03894	0	0	2.78304	0.291488	0
ENSG00000148677.6	ANKRD1	0	0	0	0	0	0.217621	0	0	0	0	0	0	0	0	0	0	0	0	0	0	0	0.545114	0	1.1403	0	0	0	0	0	0.561233	0	0	0	0	0	0	0	0	0	0	0	0	0	0	0	0	0	0
ENSG00000134461.15	ANKRD16	0	0	0	0	0	0.435243	0	0	0	0	0	0	0	0	0	0	0	0	0.291262	0	0	0	0.331496	0	0	0.322986	0	0	0	0	0	0	0	0	0	0	0	0	0	0	0	0	0	0	0.807103	0	0.291488	0
ENSG00000165887.11	ANKRD2	0	0	0	0	0	0	0	0	0	0	0	0	0	0	0	0.291251	0	0	0	0	0	0	0	0	0	0	0	0	0	0	0	0	0	0	0	0	0	0	0	0	0	0	0	0	0	0	0	0
ENSG00000152766.5	ANKRD22	0	0	0	0	0	0	0	0	0	0	0	0	0	0	0	0	0	0	0	0	0	0	0	0	0	0	0	0	0	0	0	0	0	0.188509	0	0	0	0	0	0	0	0	0	0	0	0	0	0
ENSG00000107890.16	ANKRD26	9.12355	6.86316	5.40265	3.2286	5.53225	4.31491	2.18725	2.43984	10.9876	5.30666	2.20776	5.8021	4.85295	3.66281	20.2168	2.50533	3.56031	4.94259	4.80195	2.11402	1.97942	4.79543	4.26215	1.5926	6.27187	5.89748	8.93	2.7878	11.6012	2.06271	1.10679	6.93061	13.5747	2.7547	4.38747	1.79054	11.4624	2.25149	5.97431	2.32848	10.1058	5.80356	2.22643	4.31991	7.57721	7.86479	2.98369	4.82963
ENSG00000148513.17	ANKRD30A	0.263777	11.6428	0	0	0	0.217621	0	0	0	0	0	0	0	0	0	0	0	0	0	0	0	0	0	0	0	0	0	0	0.947544	0	0	1.3258	0	0.340425	0	0	0	0	0	0	0	0	0	0	0	0	0	0
ENSG00000122359.17	ANXA11	0.241694	0	0	0	0.759961	0.606096	0	0.22942	0	0	0	0	1.2402	0	0	0.332188	0.263939	0	0	0.457715	0	0	0.331496	0	0	0.322986	0.298068	0.353169	0.352232	0.459022	0	0	0	0	0.54022	0	0	0.520122	0	0	0.871274	0.806902	0	0	0	0	0.605915	0.34481
ENSG00000138279.15	ANXA7	0	0.65048	0	0	2.09597	0.217621	0.969104	0.276959	1.18945	0	1.04177	0.24094	0	1.62852	0.483172	0	3.47611	2.04928	1.62271	2.34288	1.92477	0.417141	0.662992	0.716212	0.583509	0.432484	2.07927	2.34834	6.63284	0.250246	0.547682	0	1.17335	5.56235	1.04232	1.38074	0.267418	0.183442	5.1035	0.364473	0.443369	1.55557	0	1.15318	1.07329	5.43369	0	0
ENSG00000265190.6	ANXA8	0	1.02019	0	0	0	0	0	0	0	0	0	0	0	0	0.241586	0.332188	0	0	0	0.228857	0.234719	0	0.918729	0	0	0	0.496832	0	0	0	0	0	0	0.712388	0	0	0	0	0.703765	0	0	0	0	0	0	0	0.621351	0
ENSG00000264230.8	ANXA8L1	0	0	0	1.34621	0	0.388474	0	0	0	0	0	0	0	0	0	0.332188	0	0	0.291262	0	0.479282	0	1.20891	0	0	0	0	0	0	0	0	0	0	0.377018	0	0.432068	0	0.183442	1.61545	0	0	0	0	0	0	0.183584	0.329864	0.34481
ENSG00000185009.12	AP3M1	0.270788	0	0	0	0.311608	0	0	0	0	0	0	0.24094	0	0	0	0	0.263939	0	0	0	0	0.340888	0	0	0	0	0	0	0	0	0	0	0.451851	0	0	0.454332	0	0	0	0	0	0	0	0	0	0	0	0
ENSG00000077420.15	APBB1IP	0	0	1.54472	0	0	0	0	0	0	0	0	0	0.285577	0	0.559125	0	0	0	0.228832	0	2.66609	0	0	0	0	0	0	0	0	0	0	0	0	0	0	0	0	0	0	0	0	0	0	0	0	0	0	0
ENSG00000165322.17	ARHGAP12	80.989	41.0642	21.2027	22.3948	88.0686	59.5033	7.42315	29.6109	33.6293	20.586	17.5916	25.7516	37.5672	39.3388	24.9605	42.5752	70.9168	37.1347	16.6084	23.0238	17.3266	49.2707	17.9182	98.4807	13.0181	10.5859	69.4895	25.5961	42.7996	28.6778	24.0699	23.5085	34.1883	31.8904	12.2843	14.1215	20.8242	23.5774	32.004	8.44334	13.7651	40.5192	15.6199	14.1944	29.3982	54.8547	20.8546	29.1515
ENSG00000269891.2	ARHGAP19-SLIT1	1.01795	0	0	0	0	0.731394	0	0.414318	0.563747	0	0.800889	0.24094	0.345927	1.08513	0.241586	0.635017	1.05576	0.913069	0.228832	0.757678	1.21076	0.996036	0	0.399049	0	0	0.297039	0	0	0.229511	1.37492	0.298654	0.269653	1.02128	0.257402	0.454332	0.447303	1.69007	0	0	0	0	0.285371	0	0.412543	0.71469	0	0.34481
ENSG00000107863.17	ARHGAP21	0.241694	2.15202	0.732677	0	1.38318	3.2406	0.216125	0	1.35009	0.547384	0.251606	1.36072	1.32336	0.710044	0.966343	3.65793	2.12699	1.13621	6.94475	0.963254	2.9205	0.187335	1.10558	0.848167	0.583509	0.432484	2.28009	0.176584	1.65201	6.37324	0.838668	0.298654	2.64177	0.523879	0.27011	1.35848	2.63469	1.24012	1.135	0	0.580849	0.268967	1.03894	0.384392	0.412543	0.543937	0.291488	0.585987
ENSG00000128805.14	ARHGAP22	0	0	0	0	0	0	0	0	0	0	0	0	0	0	0	0	0	0	0	0	0	0	0	0	0	0	0	0	0.595312	0.561233	0	0	0.269653	0	0	0	0.585486	0	0	0	0	0	0	0	0	0	0	0
ENSG00000150347.15	ARID5B	0	0	0	0	0.224177	0	0.432249	0.45884	0.267055	0	0	0	0	0	0.316699	0.91469	0.35381	0	0.454952	0.252769	0	0	0	0	0.583509	0	0	0.3276	0	0.229511	0	0	0.610937	0	0	0	0	0.16834	0.344189	0	0	0	0	0.513576	0.269605	1.11273	0	0
ENSG00000138175.8	ARL3	0	0.613268	0.494341	0	0	0	0	0.414318	0	0	0.286956	0	0	0.186709	0.559125	0	0	0.584363	0.228832	0	0	0.587585	0.276394	0	0	0	0	0.3276	0	0	0	0	0	0.261939	0	0.4432	0	0	0.719152	0	0	0	0	0	0.269605	0	0	0
ENSG00000165309.13	ARMC3	0	0	0	0	0	0	0	0	0	0	0	0	0	0.504939	0	0	0	0	0	0	0	0	0	0	0	0	0	0	0	0	0	0	0	0	0	0	0	0	0	0	0	0	0	0	0	0	0	0
ENSG00000169126.15	ARMC4	0	0	0.494341	0	0	0.256886	0	0.22942	0	0	0.286956	0.481881	0	0	0	3.68192	0	0	0.228832	0	0	1.71924	0.276394	1.00834	0	0.937678	1.19124	0	3.00636	1.19866	0	0.895961	0.495578	0.261939	0	0	0	2.04052	0	0	0	0	0.285371	0.384392	0	0.170753	0	0
ENSG00000188611.14	ASAH2	0	0	0	0	0	0	0	0	0	0	0	0	0	0	0	0	0	0	0	0	0	0	0	0	0	0	0	0	0	0	0	0	0	0	0	0	0	0	0	0	0	0	0	0	0	0	0	0
ENSG00000196372.12	ASB13	0	0	0	0	0	0.731394	0	0	0	0	0	0	0	0	0	0	0	0	0	0.252769	0	0	0	0	0	0	0	0	0	0	0	0	0	0.188509	0.27011	0	0	0	0.359576	0	0	0	0	0	0	0.568798	0	0
ENSG00000138303.17	ASCC1	1.02497	2.42144	0	0.673104	3.88248	0	0.320729	0	2.19571	0	0.538562	1.7214	0	1.58895	1.19168	2.21408	2.05674	1.62727	9.31639	0.78096	2.63113	1.15723	0.932515	0.716212	2.66162	0	4.8615	1.09866	1.59743	1.69915	0	2.03889	0.610937	3.01688	0	1.70705	7.35394	2.63348	5.0134	1.09342	0.84492	5.65592	0	1.59878	2.98021	0.898274	0.567539	0
ENSG00000138138.13	ATAD1	0.812365	1.22654	0	1.34621	0.672531	1.25896	0.255961	0.643738	3.01304	1.09477	1.14782	0.24094	4.69947	2.69137	1.91812	1.96377	2.22667	2.04928	5.09592	0.552102	1.43564	0.986788	1.38197	0.399049	1.27621	0	1.48622	0.92208	2.545	0	1.39778	1.01174	1.17335	7.11208	0.478793	0	2.64212	0.856801	1.03257	0	1.60507	2.75769	1.5754	1.02715	4.57986	1.49795	0.828154	0
ENSG00000107669.17	ATE1	2.92153	1.02019	0.820996	0.604644	1.16115	2.46486	0.320729	1.15012	0.267055	2.43528	0.939007	1.7214	0.691854	1.3844	1.84217	1.18816	0.981367	3.80638	2.29836	0.228857	1.02085	1.08098	0.642334	1.72455	1.27621	0.755471	4.56636	0.710345	3.34989	0.530862	0.279556	1.3258	1.71266	4.09617	1.45438	1.81281	2.01493	1.04158	1.63084	0	0.84492	1.46971	0.502331	1.76195	0.269605	2.09956	1.15051	1.22599
ENSG00000165629.19	ATP5C1	27.6814	29.1518	26.7914	6.59412	20.5354	23.6165	10.4081	17.8184	7.63076	16.7165	4.05042	5.6308	46.0989	23.7658	45.4273	41.553	10.3571	36.2662	28.4634	11.9179	13.7884	13.4019	20.0881	7.14068	9.6262	12.0917	33.041	7.9895	35.9114	22.8527	16.1066	29.5835	52.4789	14.3301	8.17329	10.4493	20.6212	23.3429	12.6133	5.84298	25.9753	19.0626	13.622	15.5652	13.2321	16.3738	12.7246	14.6646
ENSG00000107518.16	ATRNL1	2.56346	2.83971	0.732677	25.5435	27.8144	0	0.255961	0	0	0	0.400444	0	1.76241	0.355576	0	10.5443	12.2971	1.46492	8.37475	0	11.5598	2.0253	0.60789	21.0512	0	0.322986	1.19124	0	0.297656	18.1511	0.547682	2.67594	0	0.188509	0	0.4432	4.90327	0	60.395	0	0.853705	0.82532	0	0.350407	3.26609	0.341506	0.329864	3.03796
ENSG00000119986.6	AVPI1	0	0	0	0	0	0	0	0	0	0	0	0	0	0	0	0	0	0	0	0	0	0	0	0	0	0	0.297039	0	0	0	0	0	0	0	0	0	0	0	0	0	0	0	0	0	0	0	0	0
ENSG00000151929.9	BAG3	0	0	0	0	0	0	0	0	0	0	0	0	0	0.186709	0	0	0.70762	0	0	0	0	0	0	0	0	0	0.594077	0	0	0	0	0	0	0	0	0	0	0.85947	0.359576	0	0	0	0	0	0	0.183584	0	0.292993
ENSG00000107949.16	BCCIP	0	0	0	0	0	0	0	0	0	0	0	0	0.285577	0	0	0.291251	0	0	0	0	0	0	0	0.399049	0	0	0	0.533761	0	0	0	0.252936	0.341285	0.450448	0.514804	0	0.292743	0.16834	0	0	0	0.192316	0	0	0	0	0.329864	0.310998
ENSG00000165626.16	BEND7	0	0	0.406021	0	0.224177	0.770659	0.320729	0	0	0	0	0	0	0	0	0	0.70762	0	0	0	0.704157	0	0	0	0.692705	0	0	0	0.297656	0	0	0.298654	0	0	0	0.216034	0	0.16834	0	0	0	0	0	0	0	0	0	0
ENSG00000122870.11	BICC1	0	2.45865	0	0	2.54433	0	0	0.22942	1.06822	1.17668	0	0	0	0	0	0.635017	0	0	0	0	0	0.246697	0	0.424084	0	0	0	0	0.649888	0	0	0.804525	0	0.340425	0.27011	0.355187	4.05518	0.351782	0	0	0	0	0	0	0	0.183584	0	0.310998
ENSG00000095585.16	BLNK	0	0	0	0	0	0	0	0	0	0	0	0	1.03778	0	0	0	0.821239	0	0	0	0	0	0	0	0	0	0	0	0	0	0	0	0	0	0	0	0	0	0	0	0	0	0	0	0	0.379199	0	0
ENSG00000107779.13	BMPR1A	1.03303	1.26375	0.494341	0	0	0.949016	0	0.22942	0	0.547384	0.400444	0	0.571154	0.711153	0.241586	0	0.791817	1.20525	1.49514	0.276051	0	0.434032	0.863627	0.876384	1.27621	0.322986	0.496832	0.176584	0.892968	0.500492	0	0.298654	0.88059	1.69683	0.27011	0.216034	0.267418	0.16834	1.27126	0	1.17716	0	0	0	0	0.929951	0	1.55499
ENSG00000165733.7	BMS1	0	0.343846	0	0	0	0.645361	0.320729	0.45884	0	0	0.286956	0.438693	0.917081	0.523889	1.19168	0.291251	0	1.24178	0	0	0	0	0.829183	1.00834	1.85972	0	0.891116	0.3276	0.859493	0.280616	0.559112	0.252936	1.07861	0.450448	0.478793	0.355187	0.267418	0.674694	0.703765	0	1.02422	0.192316	0.285371	0	0	1.10752	0.276051	0.310998
ENSG00000204177.10	BMS1P1	0.263777	0	1.1387	0.673104	1.07157	0.692129	2.03278	0.920698	0.267055	3.51536	1.07712	2.19492	1.31196	0.355022	0	0.926268	0.263939	0	0	0	0.262044	0.545114	0	0.798098	1.27621	0	0.298068	0.680768	0.649888	0	0.279556	0	0.682569	1.7652	0	0.926409	1.41307	0.506354	0	0	0.28164	1.26818	2.07788	1.89113	0.535787	1.61216	0.552102	0.292993
ENSG00000270025.2	BMS1P7	0	0.750769	0	0	0.448354	0.731394	0.216125	0.506379	0	0.547384	0	0.757641	0.856731	0.168313	0.559125	0.873753	0.35381	0	0.22612	0	0.234719	0.187335	0.310838	0.691177	0.583509	0.791825	0	0	0	0.479757	0	0	2.18513	1.20473	0	0.216034	0.534836	0.858136	0.719152	0	0.290425	0	0	0.768784	0.805392	1.30915	0	0
ENSG00000176171.11	BNIP3	1.07614	0.343846	0.494341	0	0.311608	0	0	0.828636	0.563747	0	0	0	0	0	0.241586	1.20594	0.35381	0.584363	0	0	0	0	0	0	0	0	0.892145	0	0.595312	2.30186	0	0.429836	0.269653	0.261939	0.239396	0	0.534836	0	1.42292	0	0	0	0	0.350407	0.825085	0.170753	0	0
ENSG00000166275.15	BORCS7	0	0	0	0	0	0	0	0	0	0	0.286956	0	0	0	0	0	0	0	0	0	0	0	0	0	0	0	0	0	0	0	0	0	0	0	0	0	0	0	0	0	0	0	0	0	0	0	0	0
ENSG00000270316.1	BORCS7-ASMT	0	0.406923	0	0	0	0	0	0	0	0.547384	0	0	0.620102	0.186709	0	2.7726	0	0	0	0	0.234719	0.187335	0	0	0	0.432484	0	0	0.297656	0	0	0	0.225925	0	0.27011	0.908664	0	0	0	0	0	0	1.50699	0	0.53921	0.354337	0	0
ENSG00000095564.13	BTAF1	4.62846	6.24413	3.91939	0.604644	5.21589	8.98896	3.99592	3.08133	4.88746	5.38858	3.14677	6.04304	4.38632	3.94702	4.87602	8.41828	10.0663	11.1797	8.63427	1.28587	11.5486	7.45134	3.48807	6.00039	3.02674	3.34444	12.7087	2.01674	13.0065	10.7214	5.52254	6.83621	8.35799	10.7313	2.07404	5.50869	2.54976	7.66769	6.74973	2.47013	6.34999	10.1545	5.13817	9.31025	6.09481	5.70355	3.26725	6.07143
ENSG00000138152.8	BTBD16	0	0	0	0	0	0	0	0	0	0	0	0	0	0	0	0	0	0	0	0	0	0	0	0	0	0	0	0	0	0	0	0.252936	0	0.340425	0	0	0	0	0	0	0	0	0	0	0	0.562783	0	0
ENSG00000166167.17	BTRC	0	0.306634	0.326655	0	0.623215	0.256886	0	0	0.84562	1.12838	0.754819	0	1.25161	0.186709	0.558285	1.52035	0.263939	0	0	0.505539	0.469438	0.374669	0.662992	0	0.583509	0	1.58774	0.176584	0.352232	0.918045	0.827238	0.429836	0.269653	1.84874	0.514804	0.926409	0.267418	1.51906	0.911687	0	0	0.192316	0	0	0.537499	0.170753	0.291488	0.637803
ENSG00000154473.17	BUB3	0	0	0	0	0.311608	0	0	0	0	0.629299	0.573911	0	0	0	0	0	0	0.913069	0	0.252769	0.234719	0	0	0	0	0	0	0	0	0	0	0	0	0	0.257402	0.216034	0.267418	0	0.344189	0	0	0	0	0.350407	0	0	0	0
ENSG00000148655.14	C10orf11	0.270788	0	0	0	0.401187	0.256886	0	0	0	0	0	0.318948	0	0	0	0	0	0	0	0	0	0.170444	0	0.424084	0	0.468839	0	0.800641	0	0.561233	0	1.3258	0	0	0	0.216034	0.267418	0	0.567498	0	0.733794	0	0	0	0	1.4799	0	0
ENSG00000179133.12	C10orf67	0	0	0	0	0	0	0	0	0	0	0	0	0	0	0	0	0	0	0	0	0	0	0	0	0	0	0	0	0	0	0	0	0.341285	0	0	0	0	0	0	0	0	0	0	0.350407	0	0	0	0
ENSG00000120029.12	C10orf76	3.41193	4.51038	0.326655	0	3.12252	5.81067	1.84159	0.276959	2.98206	1.162	1.84266	1.28271	1.20266	4.82372	3.03385	4.84609	2.68429	6.29793	3.43167	1.21539	5.05809	0.545114	2.94303	0.424084	1.38541	1.11481	6.95106	4.33951	4.52814	2.73051	2.76127	5.0746	1.87175	5.57752	3.01891	3.49759	4.54832	1.60567	7.84384	1.23506	1.13534	0.278177	1.89505	1.63277	2.97337	5.29949	1.88699	6.01961
ENSG00000119965.12	C10orf88	0.241694	0	0.494341	0.673104	0	0.217621	0	0.414318	0.281873	0	0.286956	0.24094	0	0	0.483172	0	0	0	1.16505	0	0	0.246697	0	0.424084	0.583509	0	0	0	0.649888	0	0	1.28008	0	0	0	0	0.267418	0	1.37675	0	0.28164	0	0.285371	0.350407	0.535787	0.758398	0	1.00062
ENSG00000154493.18	C10orf90	0	0	0	0	0	0	0	0	0	0	0.251606	0	0	0	0	0	0	0	0	0	0	0	0	0	0	0	0	0	0	0	0	0	0	0	0	0	0	0	0	0	0	0	0	0	0	0	0	0
ENSG00000165995.19	CACNB2	0	0	0	0	0	0	0	0	0	0	0	0	7.16371	0	0	0.302829	0.35381	0	0.915328	0	0	0.170444	0	0	0	0	0	0	0	0	0	0.429836	0	0	0	0	0	0.338014	0	0	0	3.0941	0	0	0	0	0	0
ENSG00000151893.14	CACUL1	4.81004	9.0498	4.16668	1.20929	6.828	7.61221	2.18414	0.276959	0.861778	1.7913	0.754819	7.00536	1.52578	3.51567	3.19948	4.64292	5.59897	4.35823	6.36661	2.96024	4.32661	5.15111	5.20153	3.84815	2.66162	2.26641	6.55045	2.54091	9.66397	2.74978	2.49314	3.58133	5.88968	3.65584	0.496798	3.90392	4.14271	1.73271	9.15905	1.96401	4.89998	3.28641	0.502331	8.9227	9.6998	2.66916	5.22349	2.56922
ENSG00000183049.12	CAMK1D	0.483388	0	0	0.604644	0	0.388474	0	0.920698	0.281873	0.547384	0	0.722821	0	0	0.558285	0	1.15543	0	0	0	0.524088	0	0	0	0	1.22431	0	0.92208	0.859493	0	0.279556	0	0.793135	0.188509	0.514804	0.787255	0	0.535223	0	0	0	0	0	0.863982	0.412543	1.05018	0.276051	0.34481
ENSG00000148660.20	CAMK2G	0.270788	0.406923	0	0	0.224177	0.256886	0.57669	0	0.267055	0	0	0	0	0	1.99323	0.664375	2.93842	3.29106	0.457664	0.505539	4.12685	1.14959	1.56106	1.64626	0.583509	0	0	1.81458	1.70658	2.28112	0	0	1.12963	0.377018	0	1.67365	0	0	0	0.728946	0.56328	2.8904	0	0.350407	0.803681	7.36897	1.7948	0
ENSG00000165806.19	CASP7	0	0	0	0	0	0	0	0	0	0	0	0.722821	0	0	0	0	0	0	0	0	0	0.493394	0	0	0	0.432484	0	0	0.297656	0.229511	0	0	0	0	0	0	0	0	0	0	0	0	0	0.350407	0	0	0	0.34481
ENSG00000188649.13	CC2D2B	0	0	0	0	0	0	0	0	0	0	0	0	0	0	0	0	0.617749	0	0	0	0	0	0	0	0	0	0	0	0	0	0	0	0.269653	0.340425	0	0	0	0	0	0	0	0	0	0	0	0	0	0.292993
ENSG00000060339.13	CCAR1	5.69655	9.14134	2.69237	1.27775	8.83914	13.4117	3.98102	2.25494	7.229	2.22315	5.49911	7.08336	3.95724	9.64635	6.08731	9.8977	7.81584	11.3218	4.47728	2.24975	12.8785	3.30391	4.77362	11.0707	5.79756	4.28255	8.53999	9.39577	7.79868	4.76666	4.41574	8.1744	3.4349	11.3135	3.11635	3.51325	7.5085	5.37089	7.46888	4.35295	4.5832	6.01996	5.84574	13.5962	8.90041	16.1681	5.49204	11.6808
ENSG00000165813.18	CCDC186	0	0	0.326655	0	0.311608	0	0.320729	0	0.801166	0	0	0.877386	0.345927	0.187263	0	0	0.263939	1.0429	1.10262	0	0.262044	0	0	0.292128	1.27621	0	1.09091	0.710345	0.649888	0.688534	0	0	1.02385	0.717444	0	0	0.292743	0.366884	1.04795	0	0	0	0	0.350407	0.53921	0.72752	0.276051	0
ENSG00000108091.10	CCDC6	1.26666	0	0	0	1.7372	1.59438	0.320729	0	1.08304	0	0.286956	0	0.285577	0.72844	0	0.291251	0.35381	0	1.04019	1.03436	2.76555	0.511333	0	0	0	0	1.29173	0.655199	0.892968	0.280616	0	0	0.269653	3.39365	0.509506	0.227166	1.92739	1.01004	0.359576	0.506118	0	1.1333	0.4682	0.897968	0.412543	1.0999	0	1.03443
ENSG00000216937.13	CCDC7	5.05174	8.30162	1.30638	3.76478	9.40829	1.15913	0.320729	10.0824	3.01304	2.30507	2.81374	0.481881	14.7223	8.75234	16.6656	15.0891	11.7831	26.5066	22.6403	0.710484	7.34435	6.70305	6.63173	51.3623	5.79756	0.864969	23.4245	5.92319	9.47176	2.66395	3.85663	6.00982	0.991156	9.223	2.66297	8.29453	18.2439	6.14642	9.24915	5.33686	4.86694	14.3228	12.8328	0	9.87528	8.41995	2.03248	10.9012
ENSG00000107443.15	CCNJ	0	0	0	0	0	0	0	0	0	0	0	0	0	0	0	0	0	0	0	0	0	0	0	0	0	0	0	0	0	0	0	0	0	0	0.239396	0	0	0	0	0	0	0	0	0	0	0	0	0
ENSG00000108100.17	CCNY	1.77213	5.35586	0.326655	0.604644	6.55235	7.64397	2.15433	1.79084	1.40937	3.0499	0	6.10866	2.73984	2.58101	4.54559	5.48731	13.1452	4.06204	6.86876	2.57363	4.40094	13.3578	4.31725	1.1403	0.692705	0	12.0122	3.25683	12.1048	2.62248	1.38635	1.9077	4.05208	3.57711	3.56443	1.26385	2.36988	3.10563	11.3165	1.09342	1.5875	5.37854	0.4682	0.350407	2.15684	7.761	0.276051	3.70958
ENSG00000107771.16	CCSER2	11.1474	14.7236	4.41373	15.5953	13.0276	19.2057	5.40215	9.34433	4.09608	6.9152	5.19081	6.04449	4.62295	14.0637	4.87686	5.60392	8.39688	12.9043	11.745	8.44628	21.8968	7.14319	8.16438	10.0656	4.73974	9.00729	26.4041	4.75824	7.46752	10.1033	4.98629	8.55506	9.168	12.6436	7.41487	7.98839	10.5562	9.4306	30.4808	7.36697	5.73611	7.48263	2.6605	13.0925	7.99489	18.3616	3.06838	18.0747
ENSG00000151465.13	CDC123	1.53745	0.343846	0	0	2.00593	1.74097	0	0	0	0	0.286956	1.31608	0.571154	1.08402	0.950096	0.302829	2.42035	0.292181	0.746213	0.733766	0.524088	0.187335	0.932515	0.292128	0	0	1.18815	0.176584	0.297656	1.2194	0.279556	0.252936	0.225925	0.528934	0	0.216034	2.6373	0	0.703765	0	2.2619	0.192316	0.570742	0	2.31091	1.41735	0	0.603991
ENSG00000107736.20	CDH23	0.534565	0	0	0	0	0	0	0	0	0	0	0	0	0	0	0	0.35381	0	3.08883	0	0	0	0	0	0	0.322986	0	0	0	0	0	0	0	0	0	0	0	0	0	0	0	0.192316	0	0	0	0	0	0
ENSG00000170312.15	CDK1	0.270788	0	0	0	0.224177	0.513773	0	0	0	0	0	0	0	0	0	0.302829	0	0	0.228832	0.276051	0	0.528223	0	0	0	0	0.893175	0	0.352232	0.229511	0	0	0	0	0	0	0	0	0	0	0	0	0	1.11919	0.807103	0.51226	0	0
ENSG00000185267.9	CDNF	0	0	0	0	0	0	0	0	0	0	0	0	0	0	0.316699	0	0.263939	0	0.228832	0	0	0.246697	0	0	0	0	0	0	0	0	0	0	0	0	0	0	0	0	0	0	0	0.278177	0	0	0	0	0	0
ENSG00000048740.18	CELF2	5.64537	0	0	0	0	0	1.755	0.276959	0	0	0	0	0.620102	1.47694	0	0	0	0	0	0	0	0	0.331496	0	0.692705	0.791825	0	0	0	0	0	0	0	0	0	0	0	0.366884	0	0	0	0	0	1.21439	0.267894	0	0.276051	0
ENSG00000138180.15	CEP55	1.06212	0.750769	0.326655	1.81393	0.625364	1.60188	0.255961	0.414318	0.281873	0	1.07712	0.318948	0.620102	0.168313	0.633398	0.885331	0	0.714196	0.454952	1.03436	0.496763	0.246697	0	0.292128	0.583509	0.468839	0	0.176584	0.595312	0	0	0.429836	1.33244	0.261939	1.28912	0.4432	1.27488	0	0.703765	0.364473	0	0.192316	0	0.863982	1.09469	0	0.582975	0.87898
ENSG00000197748.12	CFAP43	0	0	0	0	0	0	0	0	0	0	0.860867	0	0	0	0	0	0	0	0.454952	0	0	0	0	0	0	0	0	0	0	0	0	0	0.269653	0	0.239396	0.681498	0	0.16834	0	0	0	0.278177	0	0.350407	0	0	0	0
ENSG00000171811.13	CFAP46	0	0	0	0	0	0	0	0.414318	0	0	0	0	0	0	0	0	0	0	0	0	0	0	0	0	0	0	0	0	0	0	0	0	0	0	0	0	0	0	0	0	0.290425	0	0	0	0.267894	0	0	0.689619
ENSG00000120051.14	CFAP58	0	0	0	0	0	0	0	0	0	0	0	0	0	0	0	0.332188	0	0	0	0	0	0	0	0	0	0	0	0	0	0	0	0	0	0	0.27011	0	0	0.183442	0	0	0	0	0	0	0	0	0	0
ENSG00000156042.17	CFAP70	0.241694	0	0	0	0.448354	0	0	0	0	0	2.12962	0	0	0.374527	0.241586	0.302829	0	0	0	0	0	0	0	0	0.692705	0	0.297039	0	0.297656	0.459022	0	0	0	0.188509	0	0.864135	0.267418	0	0.359576	0	0	0	0.502331	0.513576	0	0	0	0.292993
ENSG00000279458.2	CH17-335B8.4	0	0	0	0	0	0	0	0	0	0	0	0	0.285577	0	0	0	0	0	0	0	0	0	0	0	0	0	0	0	0	0	0	0	0	0.680851	0	0	0	0	0.359576	0	0	0	0	0	0	0	0	0
ENSG00000182022.17	CHST15	1.79421	1.70788	1.3947	0	8.15925	0	3.61043	4.78614	1.69258	0	0.6874	5.9233	2.18009	5.96458	8.77028	8.26612	3.84953	7.5072	5.77804	2.73075	2.83632	1.81343	3.06702	0	0	1.11481	4.36554	4.95399	0	10.2995	5.60834	3.90087	9.89909	4.09593	1.01901	3.59222	4.67494	0.183442	4.23798	2.47013	3.41482	5.97746	3.11682	16.243	5.83376	1.97933	6.55787	5.38181
ENSG00000213341.10	CHUK	0	0	0.326655	0	0	0.217621	0.255961	0	0	0	0	0.24094	0	0.936317	0.559125	0	0	0	0	0.276051	0.262044	0	0	0.798098	0	0.432484	0.496832	0	0	0.730003	0	0	0	0.864304	0	0	0	0	0	0.506118	0.28164	0.268967	0	0	0	0.568798	0	0
ENSG00000122873.11	CISD1	0	0.306634	0	0	0	0	0	0	0	0	0	0	0	0	1.19252	0	0	0	0	0	0	0	0	0	0	0	0	0.443465	0.297656	0.229511	0	0	0	0	0	0	0	0	0	0	0	0	0	0.384392	0	0	0	0
ENSG00000119946.10	CNNM1	0	0	0	0	0.311608	0	0	0	0	0	0	0	0	0	0	0	0	0.292181	0	0	0.786132	0	0	0.798098	0	0	0	0	0.297656	0	0	0	0	0.188509	0	0	0	0	0	0	0	0	0	0	0	0	0	0
ENSG00000148842.17	CNNM2	0.527554	0	0	0	0	0	0	0	0	0	0	0	0	0.168313	0	0.291251	0.263939	0.620888	0.228832	0.228857	0.234719	0	0	0	0	0	0.297039	0.176584	0.297656	0.459022	0	0	0	0.340425	0	0.227166	0	0.366884	0	0	0	0	0	0	0	0.189599	0	0
ENSG00000197467.14	COL13A1	0	0	0	0	0	0.388474	0	0	0	0	0	0	0	0	0	0	0	0	0	0	0	0	0	0	0	0	0	0	0	0	0	0	0	0	0	0	0	0	0	0	0	0	0	0	0	0	0	0
ENSG00000065618.18	COL17A1	0	0	0	0	0	0	0	0	0	0	0	0	0	0	0	0	0	0	0	0	0	0	0	0	0	0	0	0	0	0	0	0	0.341285	0	0	0	0	0	0	0	0	0	0	0	0	0	0	0
ENSG00000148444.15	COMMD3	0	0	0	0	0	0	0	0	0.267055	0	0	0	0	0.186709	0	0	0	0	0.22612	0.228857	0	0	0	0	0	0	0	0	0	0	0	0	0	0	0	0	0.292743	0	0	0	0	0.278177	0	0	0	0	0	0
ENSG00000269897.5	COMMD3-BMI1	0	0	0	0	0	0	0	0	0	0	0	0	0	0	0	0	0.273746	0	0	0.505539	0	0	0.331496	0	0	0	0	0	0	0	0.547682	0	0.225925	0	0.27011	0	0	0.550325	0	0	0	0	0	0	0	0.52509	0.329864	0.34481
ENSG00000165644.10	COMTD1	0	0	0	0	0	0	0.511922	0	0	0	0	0	0	0.373418	0	0	0	0	0	0	0	0	0	0	0	0	0	0	0	0	0	0	0	0	0	0	0	0	0	0	0	0	0	0	0	0	0	0
ENSG00000014919.12	COX15	0	0	0	0	0.401187	0	0	0	0	0	0.400444	0	0	0.187263	0	0.291251	0.263939	1.62727	0.683784	0	0	0.740091	0	0	0	0	0	0	0	0	0	0	0	0.340425	0	0.4432	0	0.183442	0	0	0	0	0	0.350407	0	0	0.276051	0
ENSG00000107864.14	CPEB3	0.791331	0.994326	0.812043	0	4.01708	3.45193	2.62749	1.332	0	0	4.42943	1.23952	2.43146	1.08346	2.06835	5.44168	1.87699	2.04928	3.15126	0	7.50694	1.20895	0.331496	0.584256	1.96892	0.901323	1.98511	1.98559	0.892968	1.87756	1.64305	1.05746	1.41989	1.57669	0.257402	1.15357	2.89316	0.50502	4.84942	0.506118	1.1617	0.470492	1.47286	1.98317	1.75886	2.32845	0.874463	0
ENSG00000121898.12	CPXM2	0	0	0	0	0	0	0	0	0	0	0	0	0	0	0	0	0	0	0	0	1.6802	0	0	0	0	0	0	0	0	0	0	0	0	0	0	0	0	0	0	0	0	0	0	0	0	0	0	0
ENSG00000095794.19	CREM	0.527554	0	0	0	0.712794	0.217621	0	0.22942	0.53411	0	0.286956	0	1.59753	0	0.316699	0.302829	0.263939	0	0	0	0	2.16356	0.60789	0	0.583509	1.51094	0	0.176584	0	0.250246	0.559112	0.298654	0	0.188509	0.257402	0	0	0.16834	0	0.506118	0.28164	0	0	0.350407	0.537499	0.562783	0	0.292993
ENSG00000169826.7	CSGALNACT2	1.69186	3.40442	1.3947	2.69242	2.19245	1.98285	0.536854	1.2452	1.39589	2.87138	2.97658	1.87742	0.620102	1.44015	1.0423	0.873753	1.06556	1.29856	1.55214	0.228857	2.94562	0.902893	1.4853	1.11526	2.44323	3.56387	2.58022	0.176584	3.29532	0.709268	3.89092	0.804525	2.88457	2.52429	0.784914	0.454332	5.93606	3.70126	0.703765	1.45789	1.45212	1.20995	0.787702	2.36756	4.07319	1.44221	0	2.36195
ENSG00000175029.16	CTBP2	5.11886	8.33307	3.17776	7.66649	12.3109	4.27057	2.70609	3.54543	4.12571	1.7913	3.81272	5.43997	1.19126	10.0019	6.70026	3.72823	9.74187	4.9751	6.0004	4.29456	7.12711	1.71924	2.47979	11.438	2.55243	3.38122	8.33695	3.43743	19.4545	4.60371	2.48171	4.45843	4.20013	13.785	5.86516	5.75674	7.5085	15.7116	27.9137	3.66178	6.39849	4.83981	7.25019	10.3275	7.56437	4.98398	10.4544	7.10815
ENSG00000230869.1	CTGLF10P	0	0	0	0	0	0	0	0	0	0	0	0	0	0	0	0	0	0	0	0	0	0	0	0	0	0	0	0	0	0	0	0	0	0	0	0	0	0	0	0	0	0	0	0	0	0.170753	0	0
ENSG00000265018.6	CTGLF12P	0	0	0	0	0	0	0	0	0	0	0	0	0	0	0	0	0.35381	0	0	0	0	0	0	0	0	0	0	0	0	0	0	0	0	0	0	0	0	0	0	0	0	0	0	0	0	0	0	0
ENSG00000183230.16	CTNNA3	0	0	0	0	0	0	0	0	0	0	0	0	0	0	0	0	0	0	0	0	0	0	0	0	0	0	0	0	0	0	0	0	0	0	0	0	0	0	0	0	0	0	0	0	0	0	0	0
ENSG00000107611.14	CUBN	1.87448	0	0	0	0.535785	0.256886	0	0	0	0	0	0	0	0.187263	0	0	0	0.422015	0	0	0	0.187335	0	0	0	0	0	0.26688	0.914069	0	0.279556	0	0.225925	0	0.257402	0	0	0	0	0	0	0	0	0	0.267894	0.183584	0.605915	1.2778
ENSG00000108094.14	CUL2	1.51641	6.33307	1.05933	3.76478	2.77065	4.50199	0.792815	1.47462	2.79044	1.75768	0.286956	2.84118	5.4241	1.96237	2.95874	3.41382	4.55716	2.4713	0.808643	0.686572	5.42179	5.64451	3.79199	4.593	0.583509	0.645973	10.2257	3.467	10.6996	1.89829	1.38635	3.22753	3.74349	2.33603	2.79011	2.54892	4.15166	5.07108	5.14966	4.21131	2.86032	1.59458	2.84333	5.47309	3.49802	5.81776	2.27016	8.45138
ENSG00000119929.12	CUTC	0	0.343846	0	0	0	0.217621	0	0	0	0	0	0	0.571154	0	0.316699	0	0.35381	1.13621	0	0	0	0	0	0	0	0	0	0	0	0	0	0	0	0	0.257402	0.227166	0.878229	0.183442	0	0	0	0	0	0	0	0	0	0
ENSG00000138161.13	CUZD1	0	0	0	0	0	0	0	0	0	0	0	0	0	0.186709	0	0	0	0	0	0	0	0	0	0	0	0	0.298068	0	0	0	0	0	0	0	0.27011	0	0.267418	0	0	0	0	0	0	0	0	0	0	0
ENSG00000095485.17	CWF19L1	2.3067	1.33817	0	0.673104	0	0	0	0.22942	0	0	1.76452	0.24094	0	0.711153	0.483172	1.62	0.971559	2.15484	0.517381	0.963254	1.04818	0.170444	0	0	3.35433	0	0.298068	0	0.859493	0	1.65448	0.298654	0.495578	3.08501	1.0116	1.38074	0.740046	0.338014	0.688377	0.364473	0.572065	0.384632	0	0.384392	1.22136	1.81539	0.582975	0
ENSG00000108242.12	CYP2C18	0	0	0	0	0.311608	0.388474	0	0	0	0	0	0	0	0	0	0	0	0.292181	0	0	0	0	0	0	0	0	0	0	0	0	0	0	0	0	0	0.355187	0	0	0	0	0	0	0	0	0	0	0	0
ENSG00000138115.13	CYP2C8	0	0	0	0	0	0	0	0	0	0	0	0	0	0	0	0	0	0	0.678359	0	0	0	0	0	0	0	0	0	0	0	0	0	0	0	0	0	0	0	0	0	0	0	0	0	0	0	0	0
ENSG00000198924.7	DCLRE1A	0	0	0	0	0	0	0	0	0	0	0	0	0	0	0	0	0	0	0	0	0	0	0	0.292128	0	0	0	0	0	0	0	0	0	0	0	0	0	0	0	0	0	0	0	0	0	0	0	0.292993
ENSG00000152457.17	DCLRE1C	1.02497	0.65048	1.72136	0.604644	1.42774	1.33749	1.44119	0	0.267055	1.70938	0	0.920574	0.285577	1.66365	0.241586	0	1.32537	0.584363	0.748926	0	0.234719	0.170444	0.331496	0.848167	1.38541	0	0.298068	1.98559	0.892968	2.28112	1.09536	0.682772	1.10652	0.261939	0.718189	0.216034	1.43839	0.520122	4.2072	0	1.29707	0.748669	0	1.41154	1.3446	1.45424	0.276051	0.310998
ENSG00000168209.4	DDIT4	0	0	0	0	0	0	0	0	0	0	0	0	0	0	0	0	0	0	0	0	0	0	0	0	0	0	0	0	0	0	0	0	0	0.188509	0	0	0	0	0	0	0	0	0	0	0	0	0	0
ENSG00000165732.12	DDX21	4.45898	13.0757	3.35464	2.41857	7.05217	10.801	1.55271	3.58995	5.22491	2.81883	5.32236	8.75901	1.48823	1.25399	2.79142	5.30192	6.1604	8.99638	4.77125	3.16644	2.70105	2.24956	3.97197	5.94672	5.46997	4.53833	6.44805	6.95713	12.1507	4.48077	2.7727	3.87055	11.7771	16.8751	5.72531	5.40503	2.62574	3.50405	6.35632	1.45789	5.75368	5.05134	4.20177	14.9872	14.094	8.16586	2.70764	5.17235
ENSG00000107625.12	DDX50	0	0.343846	0.494341	0.604644	2.94291	1.16664	0.216125	2.16365	0.53411	1.70938	0.251606	0.757641	0.571154	0.729549	1.35984	1.24067	1.14563	2.14259	1.13602	0	0.731482	0.928474	1.51975	0.848167	0	0.322986	3.37203	0.977225	1.40893	0.459022	1.10679	0.298654	0.539305	2.07409	0.754201	0.571221	2.17844	0.366884	1.4383	0	0.443369	0	0	2.23838	2.02675	1.46106	0.605915	0.914989
ENSG00000181192.11	DHTKD1	4.42989	15.4366	12.1819	7.26723	14.9067	17.5453	4.99687	10.0348	3.17872	3.51536	5.28711	5.39823	11.3001	6.26442	27.9868	26.3303	14.9168	26.3527	26.8564	3.03071	6.05382	23.2543	20.0536	0.848167	4.63054	2.33912	1.68499	22.6237	13.6266	6.853	4.49011	6.34525	11.1305	7.60442	9.62556	14.5425	11.5034	12.2275	27.9976	4.71743	5.32788	17.8847	4.97745	5.08869	25.8522	22.0296	8.72091	5.90237
ENSG00000089876.11	DHX32	0	0	0	0	0.448354	1.34499	0	0	0	0	0	0	0	0	0.316699	0.332188	0.881688	0	1.61729	0	0	0	0.587232	0	0.583509	0	0	0	0	0.229511	0	0	0.610937	0.785818	0	0.798387	0	0	0.344189	0	0.56328	0	0	1.4696	0	0.170753	0	0
ENSG00000151240.16	DIP2C	1.5746	2.60192	1.21806	0	7.40619	5.70038	1.41626	1.5169	0.563747	0	0.860867	1.11978	2.78879	6.1145	1.43327	2.46977	1.16524	1.33508	2.76145	0.552102	2.2491	3.93347	3.03258	0	0	1.40652	5.06541	0.353169	12.6034	4.76138	3.59994	1.62445	3.2273	3.42038	1.21499	1.15357	2.3952	5.03421	0.911687	2.61177	3.48967	2.62143	1.97534	0.513576	2.29122	2.74534	1.74099	2.88021
ENSG00000151208.16	DLG5	2.13125	3.69653	0.406021	1.20929	3.08226	1.50205	3.20311	1.24218	0.594723	4.69205	3.05791	3.43589	0	4.4698	0.633398	4.33389	3.55617	2.30895	2.46205	0.78159	2.89097	1.54879	1.32598	0.399049	1.16702	1.29745	3.07705	0	2.12579	3.25555	0.547682	0	2.19721	4.78665	2.7541	4.51202	2.62574	1.60567	0.703765	0	0.886738	8.41498	0.570742	3.77911	0.535787	4.17552	0.897402	1.51898
ENSG00000187908.17	DMBT1	0	0	0.732677	0.673104	0.224177	0	0.641459	4.97104	0	0	0	0	0.345927	0	0.241586	0.302829	0.527878	0	0	0	0	1.1327	8.44765	0	0	0.864969	7.34211	0.886929	0.297656	0.459022	3.85663	0	0.451851	0	0	0	0	3.09586	0	0	13.4317	0	0.570742	0	0	0	0	1.8998
ENSG00000138346.14	DNA2	22.2789	11.875	10.8842	5.11099	11.0195	13.3356	7.75878	1.7961	6.16212	6.2859	16.5337	8.38561	9.12997	10.8468	8.20948	9.61265	5.54833	11.1837	17.2894	3.21175	17.2679	7.33921	4.60052	8.3879	11.3767	3.63657	11.5071	7.51646	16.7669	9.79374	3.59994	6.68711	23.8902	15.5129	8.58107	16.7661	16.9765	9.86189	22.3622	2.91578	4.2752	13.2748	5.2747	16.379	11.8626	21.4428	7.90026	5.83464
ENSG00000148719.14	DNAJB12	0.783271	1.95144	0	1.20929	2.36256	2.25353	0.969104	3.63525	3.02652	0.581	4.13831	1.23952	0	0.523335	0.483172	2.81354	6.49047	3.71307	1.26088	1.51662	6.66752	0.681777	3.3572	1.6713	0.583509	0	0.894205	0.710345	1.78594	1.06172	1.64305	2.31665	1.75639	4.51508	2.7594	1.14244	1.63465	1.51639	1.61545	0	0.28164	0.999217	2.37513	3.48991	4.23411	9.55675	2.02498	3.33095
ENSG00000136770.10	DNAJC1	0.241694	2.49586	0.326655	1.95085	3.9275	6.94434	3.99485	1.56668	2.22669	2.85245	1.61569	1.19778	8.89334	3.04805	7.5343	2.07349	5.52871	3.67655	13.7375	1.602	2.34719	3.78861	1.59551	1.56438	2.07811	7.88827	8.33917	2.31877	4.30614	7.28165	7.43371	0	1.8122	1.3097	1.57724	9.33574	5.61799	7.32258	6.5673	1.01224	5.23222	8.94016	2.26056	2.26561	6.48595	3.47286	2.38528	0.896985
ENSG00000108176.14	DNAJC12	0	0.306634	0	0	0	0	0	0	0	0	0	0	0	0	0.241586	0	0	0	0	0	0	0	0	0	0	0	0	0	0	0.280616	0	0	0	0	0	0	0	0	0	0	0	0	0	0	0	0	0	0
ENSG00000213551.4	DNAJC9	0	0	0	0	0	0	0	0	0	0	0	0	0	0	0	0	0	0	0	0	0	0	0	0	0	0	0	0	0	0	0	0	0.269653	0	0	0	0	0	0	0	0	0	0.502331	0	0	0	0	0
ENSG00000107554.16	DNMBP	0.541577	0.65048	0.732677	0.604644	0	7.94641	2.19417	0.414318	0.548928	0	1.98078	0.963762	2.42149	1.06617	0.633398	2.10285	0	1.13621	1.04019	0.457715	0.714001	0.77492	0.829183	1.48927	3.02674	2.19327	2.28009	0.982799	2.19274	0.760374	0.279556	0.429836	0.539305	1.39324	1.21499	0.216034	1.99855	1.89971	4.4459	1.09342	0	0.547144	0	1.76195	1.6125	0.872612	0.828154	0.655807
ENSG00000150760.12	DOCK1	43.5226	32.3579	12.4821	16.6792	58.2277	11.5896	28.1069	70.3239	43.0918	20.1542	18.4149	77.2102	126.615	74.4413	182.47	20.856	19.7405	116.261	224.827	28.5221	68.2515	2.06937	86.2856	103.061	21.8048	13.4771	18.7647	36.4941	15.9285	19.763	17.4692	30.5535	10.6681	196.791	98.286	15.1161	15.2126	35.4154	69.5159	44.8854	228.871	27.4628	6.8504	51.4329	24.909	26.5379	90.8473	42.9011
ENSG00000166171.12	DPCD	0	0	0	0	0	0	0	0	0	0	0	0	0	0	0	0	0	0	0	0	0	0	0	0	0	0	0	0	0	0	0	0	0	0.261939	0	0	0	0	0	0	0	0	0	0	0	0	0	0
ENSG00000151640.12	DPYSL4	0	0	0	0	0	0	0	0	0	0	0	0	0	0	0	0	0	0	0.228832	0	0	0	0	0	0	0	0	0	0	0.280616	0	0	0	0	0	0	0	0	0	0	0	0	0	0	0	0	0	0
ENSG00000138166.5	DUSP5	0.527554	0	0	0.673104	0	0	0	0	0	0	0	0	0	0	0.241586	0	0.263939	0	0	0	0	0	0.331496	0	0	0	0	0	0	0	0.559112	0	0.495578	0.528934	0.257402	0	0	0	0.927074	0	0	0	0	0.350407	0	0	0	0.585987
ENSG00000108001.13	EBF3	0	0	0	0	0	0	0	0	0	0	0	0	0	0	0	0	0	0	0	0	0	0	0	0	0	0	0	0	0	0	0	0	0	0	0	0	0	0	0	0	0	0	0	0	0	0	0	0.585987
ENSG00000122882.10	ECD	0.505471	0.406923	0.900362	0	1.02655	0.217621	0.320729	0.276959	0.53411	0	0.400444	0.318948	0	1.29189	0.79987	0	0	0.714196	0.748926	0	0.262044	0.417141	0.642334	0.823132	0	0.432484	2.0803	0.3276	1.15715	0	0.279556	0	0.539305	0.261939	0	0.582353	0.585486	0.16834	0.719152	0	0	0	0.285371	1.50358	0.535787	0.170753	0.605915	1.2598
ENSG00000134463.14	ECHDC3	0.483388	0	0	0.604644	0.672531	0	0	0.414318	0	0	0	0.637895	0	0.168313	1.19252	0	0	0	0.746213	0	1.31022	0	0	0	0	0	1.49034	0.706337	1.15715	0.229511	0	0	0.451851	1.02128	0	0	0.894606	0.16834	2.06513	0	0	0	0	0.768784	0.269605	0	0.859026	0
ENSG00000127884.4	ECHS1	0	0	0	0	0	0	0	0	0	0	0	0	0	0	0	0	0	0	0	0	0	0	0	0	0	0	0	0.26688	0	0	0	0	0	0	0	0	0	0	0	0	0	0	0	0	0	0	0	0
ENSG00000107938.17	EDRF1	1.34693	0	0.406021	0	0.802374	0.862982	0	0	0.548928	0	0.251606	0.438693	0.285577	1.45965	0.241586	0.332188	0	0	1.20388	0.758308	0	1.772	0.97383	0	0.583509	0	0	1.05951	0.561837	0.250246	0.279556	0	1.88757	0.340425	0.779616	0.710375	0.982139	0.733767	0.719152	0	0.580849	1.01764	1.07307	2.68399	1.34631	1.46707	0	0.292993
ENSG00000107581.12	EIF3A	1.84539	1.74509	0.900362	0.604644	1.12088	3.37461	0.969104	0.506379	1.61715	1.09477	2.0622	1.75622	2.51461	2.72927	1.19168	2.81974	0.981367	2.73921	3.26337	0.528821	3.0724	0.434032	3.14278	2.44076	0	0.968959	3.8668	1.7147	2.59955	2.94075	0	1.60905	2.14869	3.45697	1.30713	1.67365	3.09355	2.09559	4.02477	0	3.19257	0.940985	0.502331	2.42878	4.1913	3.87091	1.55713	1.86159
ENSG00000151023.16	ENKUR	0	0	0	0	0	0	0	0	0	0	0	0	0	0	0	0	0	0	0.228832	0	0	0	0	0	0	0	0	0	0	0	0	0	0	0	0	0	0	0	0	0	0	0	0	0	0	0	0	0.34481
ENSG00000138185.19	ENTPD1	0	0	0	0	0	0	0	0	0	0	0	0	0	0	0	0	2.31087	0	0	0	0	0	0	0	0	0	0	0	0	0	0	0	0	0	0	0	0	0	0	0	0	0.384632	0	0	0	0	0	0.292993
ENSG00000198018.6	ENTPD7	0	0	0	0	0.224177	0.256886	0	0	0.267055	0	0	0.438693	0	0.373418	0	0.302829	0	0	0.582524	0.457715	0.786132	0	0.310838	0	0	0	0	0	0.561837	0	0.547682	0	0	0.261939	0.257402	0	0	0	0	1.09342	0	0.268967	0	0.734799	0	0	0.621351	0
ENSG00000120616.15	EPC1	0.241694	0	0.406021	0	0.936971	0	0.320729	0	0	0	0.251606	0	0	0	1.11825	0	0.537685	0	1.58284	0	0.234719	0.493394	0	0.716212	0.583509	0	0.595107	0.176584	0.649888	0.250246	0.279556	0	0.269653	0.94279	0.239396	0	0	0.521456	0	0	0	0	0	0.513576	0	0.341506	0	0
ENSG00000225830.12	ERCC6	1.93355	2.21509	6.04677	0.673104	3.2121	1.50205	1.9462	0.735799	2.1809	1.70938	0.903657	3.91777	3.14612	4.4503	4.14958	9.76868	1.86305	9.32932	7.17358	0	3.19782	0.187335	3.6336	0.691177	0	0.432484	3.07499	2.02074	2.3019	4.40893	7.82771	0.758807	11.6713	10.5431	1.80393	1.2962	7.01055	1.02514	11.3011	1.45789	3.58323	3.33326	0.285371	5.82349	12.2718	4.13703	2.30103	0.655807
ENSG00000107566.13	ERLIN1	0	0	0	0	0	0	0	0	0	0	0	0.438693	0	0.187263	1.60142	0	1.06143	0	0	0.457715	0	0	0	0	0.692705	0	0	0	1.78594	0	0	0	0.269653	0	0	0.216034	0	0	0	0.364473	0	0.384632	0	0.384392	0	0	0	0.585987
ENSG00000138190.16	EXOC6	3.36882	8.85499	0.900362	0.604644	13.2951	6.19286	2.26693	0.22942	0.84562	1.64215	1.19061	3.21023	1.25161	6.78445	2.06667	2.41726	4.34386	9.2035	3.04728	2.32023	3.19782	1.2852	2.05875	4.35412	1.16702	2.59447	3.37821	3.76346	2.78806	3.27101	2.83564	3.65737	1.64582	2.33073	0.988299	2.2494	6.59752	2.05028	4.52061	4.10744	6.47869	1.1333	0.787702	0	2.1714	0.354337	2.0938	3.69157
ENSG00000171311.12	EXOSC1	0	2.25231	0.988682	0.673104	0.759961	2.02962	0.536854	0.691278	0.53411	1.162	0.538562	0.637895	0.285577	0.374527	0.79987	0	1.36873	1.66379	2.23593	0.987166	1.31022	3.03927	0.662992	0.399049	0	0	0	0	0.892968	0.280616	0	0	0.991156	2.11068	0.772206	1.30734	1.00746	1.20992	0	0	0.56328	2.39931	0.285371	0.350407	3.75907	1.44301	0	0.292993
ENSG00000065809.13	FAM107B	0	0.919902	0	0.604644	0.401187	0	0.216125	0	0	0	0	0	0	0.186709	0.559125	0	0	0	0	0	0	0	0	0	0	0	0	0	0	0	0	0	0	0.94279	0.239396	0.227166	0	0	0	0	0	0.268967	0	3.08145	0	0.170753	0.605915	0
ENSG00000138286.14	FAM149B1	0	0	0	0	1.20832	0.256886	0.536854	0.276959	1.44034	0.581	0.286956	0	0	0	0	0.302829	0.537685	1.78961	1.03476	0.481627	0	0	0.898071	0.424084	1.38541	0.432484	0.7949	0	1.77356	0	0.279556	0	0.495578	0.261939	0.478793	0.454332	0	0.520122	0	0	0.290425	0.922566	0.285371	0.700813	0	1.92279	0	0.87898
ENSG00000151553.14	FAM160B1	0.77626	4.55336	1.46535	0.604644	1.159	0.606096	1.45609	1.24295	0.267055	4.61013	0.538562	0.963762	1.31196	0.898416	2.71799	0.967204	3.10836	2.4713	1.65883	0.504909	2.24146	1.27756	2.78376	0.798098	0	0.468839	5.36348	0.771064	2.54498	3.22954	0	2.75197	2.10246	2.96969	0.257402	1.96309	2.85146	0.873237	1.25588	0	0.56328	1.2866	0.285371	0.734799	1.6125	2.00419	0.552102	1.62261
ENSG00000148468.16	FAM171A1	0	0.687692	0.812043	2.5555	0.224177	2.16121	0	0	0.563747	0	0.400444	2.11691	0.966029	0	0	2.09665	0	0	0	0.228857	1.18344	1.11476	0.662992	0.292128	0	0	1.98717	0	4.44006	1.56222	0.547682	0	1.48673	0.523879	1.23299	0.648101	1.9479	1.18238	0.359576	0	1.41698	0	1.22177	4.97259	2.04302	0	0.276051	0
ENSG00000165660.7	FAM175B	0	0	0	0.673104	0.936971	0.731394	0	0	0	0	0	0	0	0.168313	1.11825	0.332188	0.273746	0.876544	0.743501	0.276051	0	0	0.310838	0.691177	0	0	0	0.680768	0.297656	0.250246	0	0	0.269653	0.340425	0	0	0	0	0	0	0.572065	0.192316	0.285371	0.513576	0.269605	0.733536	0.329864	1.50098
ENSG00000148481.13	FAM188A	4.88523	10.4107	5.56138	9.54888	19.3086	19.2866	10.1143	4.05181	5.13835	10.2374	2.73888	11.873	64.6098	8.54668	12.7133	19.3473	8.57095	16.1914	14.2837	1.94979	7.40121	12.1079	7.15695	3.374	6.16268	3.85006	12.099	4.53052	18.662	17.1998	8.03854	6.44563	7.06783	8.95576	4.41077	7.12669	18.1507	13.684	13.6357	0.506118	8.21456	24.8508	2.1923	8.95984	14.0666	12.9979	4.18802	14.2657
ENSG00000188916.8	FAM196A	0	0	0	0	0	0	0	0	0	0	0	0	0	0	0	0.291251	0	0	0	0	0	0	0	0	0	0	0	0	0	0	0	0	0	0	0	0	0	0	0	0	1.4082	0	0	0	0	0	0	0
ENSG00000165669.13	FAM204A	0	0	0	0	0	0	0	0	0	0	0.286956	0	0	0	0.241586	0	0	0	0	0	0	0	0	0	0	0	0	0	0	0	0	0	0.341285	0	0	0	0.585486	0	0	0	0	0	0	0	0	0.947997	0	0
ENSG00000108021.20	FAM208B	2.38802	3.47884	2.62172	3.16014	0.535785	6.68116	1.69715	0.828636	1.61715	2.27145	2.55469	1.36072	4.12355	2.65457	1.19168	0.59408	3.04224	3.31533	3.83233	0.481627	0.758807	2.5894	1.56106	1.80644	0	4.10541	2.67747	1.03394	7.43405	0.781108	1.65448	3.87998	4.08478	3.01134	0.957586	1.2816	6.39974	3.26287	3.84762	0.87059	1.97148	2.05587	1.94106	5.85748	4.87858	5.66144	1.50332	5.77853
ENSG00000122378.13	FAM213A	0.263777	0	0	0	0	0	0.432249	0	0	0	0	0	0	0	0	0	0.263939	0	0	0.228857	0	0.187335	0	0	0	0.322986	0	0	0.352232	0	0	0.429836	0	0	0	0	0	0.85947	0	0	0	0.192316	0	0	0	0.550752	0	0.310998
ENSG00000235618.7	FAM21EP	0	0	0	0	0	0	0	0	0	0	0.251606	0	0	0	0	0	0	0	0	0	0	0	0	0	0	0	0	0	0.352232	0	0	0	0	0	0	0	0	0	0	0	0	0	0	0	0	0	0	0
ENSG00000122376.11	FAM35A	0.483388	0.306634	0	0	0	2.37761	0.216125	0.45884	0	0	0.6874	0	0.917081	0.561236	0	0.302829	1.24531	0	1.71583	0	0.469438	0.374669	1.16068	1.09023	1.96892	0	0.594077	0.26688	1.80704	0.250246	0.827238	0.298654	0.610937	0.528934	0.239396	1.02555	0.292743	0.33668	0	0.364473	0.290425	0.470492	0.4682	0.384392	0.537499	0.733536	0.276051	0.34481
ENSG00000119979.16	FAM45A	0.534565	0.919902	0	0	0.401187	0.902247	0	0	0.281873	0	0.400444	0.24094	0.285577	0.54284	0.241586	1.45626	0.263939	0	0.228832	0	1.02085	0	0	0	0.692705	0	1.09091	0	0.561837	0	0.279556	0.252936	0.225925	1.39324	0	0.355187	0.534836	0	0	0.728946	0.853705	0.268967	0	0	0.53921	0	0	0
ENSG00000203780.10	FANK1	0	0	0	1.27775	0.802374	0	0.472086	0.22942	0	0	0	0	0	0.54284	0.800711	0.332188	1.51905	2.14259	0	0	0.234719	0	0.276394	0	0	0	1.18815	0.176584	0	0	0	0	0.225925	1.69683	1.21499	0	1.5423	0	0	0	0.290425	1.86355	0.285371	0	0	0.189599	0	0.34481
ENSG00000026103.21	FAS	0	0	0	0	0	0	0	0	0	0	0	0	0	0	0	0.291251	0	0	0	0	0	0	0	0	0	0	0	0	0	0	0	0	0	0	0	0	0	0	0	0	0	0	0	0	0	0	0	0
ENSG00000134452.19	FBXO18	1.33291	0.613268	0	0	0.712794	0.731394	0.320729	0.414318	0	0	0	0.637895	1.72964	0.336626	1.28304	0.291251	0.35381	0	1.16505	0	0	0.868064	0.276394	0.399049	0	0	0.496832	0	0	0.229511	0	0	0.269653	1.77026	0.993597	0.454332	0.534836	1.38093	0.719152	0.364473	0.290425	0	0	1.54073	2.29807	0.183584	0	0.655807
ENSG00000107829.13	FBXW4	13.4521	11.7204	2.61277	3.90171	6.43586	2.8926	5.09252	9.06884	6.16078	4.77396	0.503213	5.19211	5.18747	9.61177	11.8204	26.3272	13.8497	7.8644	18.3993	0.963254	12.6604	8.60857	6.94945	4.80324	6.27187	0.755471	11.4128	7.35347	4.83817	8.24845	5.32878	3.67874	4.21116	15.4821	3.04963	10.6497	10.0356	6.0558	8.12648	4.79861	8.59643	7.88706	4.73823	6.90554	4.04665	11.4992	4.33308	5.59137
ENSG00000066468.22	FGFR2	1.26666	0.813846	0	0	7.66848	0	0	0.506379	0	0	0	0.318948	0.345927	0	0	0.302829	18.6724	0	0	0.252769	4.49055	8.96691	0.642334	3.08187	0	0	0	1.86973	0	0	0.279556	0	0	0.340425	0	0	0	0.183442	3.36717	0	0	0	0	0	0.269605	13.491	0	0
ENSG00000148690.11	FRA10AC1	0	0	0.326655	0	0	0.388474	0.320729	0	0	0.547384	0	0	0	7.80154	0.241586	0.937846	0	1.26605	0.517381	0	0.234719	0	0	0.292128	0	0.468839	0.7949	0	0.352232	0	0	0.505871	0.269653	0.188509	0	0.4432	0.534836	0.183442	0	0	1.45002	0.576948	2.40926	0	0.412543	0	0	0.310998
ENSG00000151474.21	FRMD4A	0	0	0.820996	0.604644	0	0.217621	0	0	0	1.162	0.251606	0.877386	0.345927	0.168313	0.241586	0	8.11179	0.422015	0.454952	0	0	0.528223	0.552789	0	0	0.864969	0.298068	0	3.37969	0.510128	0	0	0	0	0	0	1.70581	0	0.688377	0	0	0	0	0	0.269605	2.38941	0	0
ENSG00000107862.4	GBF1	0.805354	1.09461	0.732677	0.673104	2.40758	1.8195	5.6134	1.24295	0.861778	0.629299	0.251606	0.878836	2.05939	2.87974	2.15803	0.91469	2.48494	4.8818	3.60892	1.97307	4.36377	1.88968	0.884285	2.01668	0	1.62044	4.66273	3.16497	2.43582	1.75989	1.10679	0.895961	1.30454	3.43049	0.527512	0.875267	3.17695	2.80182	3.77291	2.97624	0.290425	1.04744	0.502331	4.19749	3.63925	4.51101	3.06045	2.89822
ENSG00000057608.16	GDI2	25.1873	26.8504	17.6288	13.3137	18.7039	33.4493	12.7775	13.4482	7.16839	16.6345	11.6225	12.667	18.4248	18.5653	33.0829	16.1544	26.5781	17.5547	30.0646	7.89417	29.8396	18.7572	19.2313	16.4113	14.8778	13.4255	14.6847	11.9367	32.5155	18.5494	6.15602	15.0504	21.0432	20.8345	16.7004	12.6274	26.1196	19.7482	33.4814	6.86085	31.1227	24.4497	9.53315	23.2019	34.988	21.434	12.1033	26.6701
ENSG00000151892.14	GFRA1	0	1.50154	0	0	0	0	0	0	0	0.547384	0.400444	0	0	0	0	0	0	0	0	0	0.262044	6.81204	0	1.64626	1.27621	0	0.496832	0.26688	0	10.423	0	0	0	0	0	0	3.09355	0	0	0	0	0	0	0	0.267894	0	0	0
ENSG00000165678.20	GHITM	0	0	0	0	0	0	0	0	0	0	0	0	0	0	0	0	0	0	0	0	0	0	0	0	0	0	0	0	0	0.229511	0	0	0	0	0	0	0	0	0	0	0	0	0	0	0	0	0	0
ENSG00000108010.11	GLRX3	1.54551	1.15769	0.406021	0.604644	0.224177	2.82908	1.04878	0.45884	0.801166	2.35336	1.26131	0.920574	0.631504	2.28171	0.633398	0.291251	0	1.13621	0.228832	1.58646	1.00337	0	0.310838	2.41255	0	0.937678	1.78841	0.504184	1.19062	1.52075	0	0	1.48673	2.33578	0.257402	0.670366	0.534836	0.871903	1.03257	0	0.290425	0	0.4682	3.80318	1.48412	0.183584	0.329864	0.896985
ENSG00000148672.8	GLUD1	0.263777	1.50154	0	0	0	0.217621	0.472086	0.22942	0.267055	0	0.503213	1.16151	0.285577	0.187263	0.559125	0.885331	0.263939	0.913069	0.520094	0	2.17917	0.170444	0	0	0.692705	0.322986	0.892145	0.831783	0.704464	0.500492	0.279556	0.682772	1.03488	1.50832	0.239396	0.432068	0	0.67336	0.911687	0	0.28164	0	0	1.4696	0.950041	3.22673	0.552102	0.34481
ENSG00000120053.10	GOT1	0	0	0	0	0	0	0	0	0	0	0	0	0	0	0	0	0	0	0	0	0	0	0	0	0.583509	0	0	0	0	0	0	0	0	0.602365	0	0	0	0	0	0	0	0	0	0	0.269605	0	0	0
ENSG00000119927.13	GPAM	0	0	0	0	0	0	0	0	0	0	0	0	0	0	0	0	0	0	0	0	0	0	0	0	0	0	0	0	0	0.229511	0	0	0	0	0	0	0	0	0	0	0	0	0	0	0	0	0	0
ENSG00000151025.9	GPR158	0	0	0	0	0	7.15567	0	0	0	0	0	0	0	0	0	0	0	0	1.20659	0	0	0	0	0	0	0	0	0	0	0	0	0	0	0	0.27011	0	0	0	0	0	0	0	0	0	0	0	0	0
ENSG00000182771.18	GRID1	0	0	0	0	0	0	0	0	0	0	0	0	0	0	0	0.996563	0.537685	0	0	0	0	0.340888	0	0.292128	0	0	0	0	0	0.688534	0	0	0	0	0	0	0.560161	0	0	0	0	0	0.4682	0	0.805392	0	0	1.62042
ENSG00000198873.11	GRK5	0	0	0.326655	0	0	0.217621	0	0	0	0.581	0	0	0	0	0	0	0	0	0	0.828154	0	0.170444	0	0	0	0	0	0	0.561837	0	0	0	0	0	0	0	0	0	0.567498	0	0	0	0	0.350407	0	0	0	0
ENSG00000148834.12	GSTO1	0	0	0	0	0	0	0.255961	0	0	0	0	0	0	0	0	0	0	0	0	0	0	0	0	0	0	0	0	0	0	0	0	0	0	0	0	0	0.585486	0	0.688377	0	0	0.268967	0	0	0	0	0	0
ENSG00000065621.14	GSTO2	0	0	0	0	0	0.217621	0	0	0	0	0	0.637895	0	0.186709	0	0.605658	0.35381	2.53209	0	0	0.262044	0	0	1.27225	0.692705	0	0	0	0	0.500492	0	0	0.269653	0.450448	0	0	0	0.33668	0	0	0	0	0	0	0.412543	0.367168	0	0
ENSG00000107937.18	GTPBP4	1.29575	2.34702	0.812043	0	1.60475	0.988281	0.536854	0	0.876596	0.581	1.36408	0.318948	1.03778	1.06617	1.359	2.08507	0	0.620888	0.808643	0.962624	1.67257	0.698667	0.829183	0.399049	1.16702	1.37016	0.595107	0.710345	2.78806	1.29124	1.10679	0	0.947429	0.261939	0.496798	0.8864	1.46372	0.844368	4.52061	3.84683	1.29707	0.855124	0.4682	1.76195	4.60898	0.562783	1.26564	0.310998
ENSG00000099284.13	H2AFY2	0	0	0	0	0	0	0	1.15012	0	0	0	0	0.285577	0.187263	0	0.59408	0	1.16873	1.55757	0	0.731482	0.187335	0	0	0	0	0	0.353169	0	0	0	0	0	0	0	1.50876	0	0.718665	0.359576	0	0	0.940985	0	0	0	0	0	0
ENSG00000165996.13	HACD1	1.6037	0	2.37467	0.673104	0	1.76523	0.57669	0.45884	0	0.581	0.573911	2.07517	0.977431	0.747945	3.1866	3.02912	1.7928	0	0	0.552102	1.95973	4.43661	0	0.424084	0	1.94343	0.893175	0	2.19274	0.510128	0	0	5.67479	4.96023	0	0.216034	2.80081	1.22368	2.45548	0	0.28164	0	2.87746	3.07829	2.97166	0	0.276051	0
ENSG00000165338.16	HECTD2	2.39398	1.22654	2.2774	2.5555	0	8.19822	0	0	0.281873	1.17668	3.55368	2.48049	0	1.27072	0	3.19907	1.41937	1.88292	0.686496	0	0.524088	0.663838	2.92149	7.08701	3.93784	0	1.98614	0.443465	0	1.89829	3.05225	0.597308	0.808958	1.35135	1.56983	2.00658	1.78921	1.6834	1.07873	0	0.84492	0	0.285371	0	6.36612	0.701859	0	3.89894
ENSG00000119969.14	HELLS	1.47926	1.91423	1.14765	0	0.712794	1.78024	0	1.19766	1.42552	0.581	0	0	0	0.54284	0.241586	0	1.61306	1.46091	1.43271	0.252769	0.234719	0	0.932515	1.40739	0.692705	0.322986	0.298068	0.533761	0.947544	1.3978	0	1.05746	1.51464	2.06373	0.810329	1.95196	0.534836	0.33668	1.07873	1.77895	1.30586	0	0.570742	1.50358	0.951753	3.14499	0.567539	1.62261
ENSG00000148634.15	HERC4	18.8209	20.9387	21.4775	12.709	28.6639	10.7935	7.59144	10.874	20.5285	28.2384	9.56025	15.0372	3.01401	11.1634	21.1097	58.2769	23.1076	18.2772	42.8442	2.91367	12.3164	7.05214	16.8402	5.3875	30.3015	6.12155	23.4228	2.98037	11.6099	26.8759	6.11594	5.35785	19.3621	55.5918	9.66898	8.55647	14.4732	18.7075	27.8183	5.02144	11.7957	37.7209	12.0003	27.6551	23.0003	14.0109	15.2334	10.511
ENSG00000166135.13	HIF1AN	0.241694	0	0	0	0	0	0	0	0	0	0.251606	0.438693	0	0.374527	0	0	0	0	0.683784	0	0	0.434032	0	0.848167	0	0	0	0	0	0.280616	0	0	0	0	0	0	0.534836	0	0	0	0	0	0	0	0	0	0	0
ENSG00000156515.22	HK1	0.505471	0.306634	0	0.673104	1.38533	0	0	0.22942	0	1.75768	0	0.318948	0	0.187263	0	0.937846	1.06143	1.7571	0	0.228857	1.21076	0	0.310838	0.716212	0	0.432484	2.38264	0.620049	0	1.32161	0.279556	0	2.04771	0.602365	0.514804	0.571221	0.267418	1.17971	0.344189	0	1.86035	1.01764	0	0.513576	0.412543	0.71469	0.951215	0.310998
ENSG00000156510.12	HKDC1	0	1.15769	0	0	3.96991	0	0.472086	0.553919	0.563747	0.547384	0	0.24094	0.285577	0.523889	0	0.302829	0	0	0	0.505539	0	0	0	0	0	0	0	0	0	0	0	0.551589	0.610937	0	0	4.56663	0.740046	1.05668	0	0	1.69862	0	0	0	0	0	0	0
ENSG00000096746.17	HNRNPH3	0.534565	0.406923	0.406021	0.673104	0	1.812	0	0.276959	0	0	0	0.722821	0	0	0	0.635017	0.617749	0	0	0.228857	0	0	0	0.716212	0.583509	0	1.19021	0	0.352232	0	0.279556	0.551589	0.225925	0.188509	0.54022	0.355187	1.5423	0.183442	0.911687	0.364473	0.580849	0	0	0.384392	0	0.183584	0.989591	0.637803
ENSG00000107521.18	HPS1	0	0	0	0	0	0	0	0	0	0	0	0	0	0	0	0	0	0	0	0	0	0	0	0	0	0	0	0	0	0	0	0	0	0	0	0	0	0.16834	0	0	0	0	0.4682	0	0	0	0	0
ENSG00000099251.14	HSD17B7P2	0	0	0	0	0	0	0	0	0	0	0	0	0	0	0	0	0	0.84403	0	0	0	0	0	0	0	0	0	0	0	0	0	0	0	0	0	0	0	0	0	0	0	0	0	0	0	0	0	0
ENSG00000165868.14	HSPA12A	0	0	0	0	0	0	0	0	0	0	0	0	0	0.187263	0	0	0	0	0	0	0	0.511333	0	0	0	0	0	0	0	0.250246	0	0	0	0	0	0	0.267418	0.351782	0	0	0.580849	0	0	0	0.269605	0	0	0
ENSG00000187522.15	HSPA14	0	0.343846	0.326655	0.673104	0.311608	1.89053	0.320729	0.828636	0.267055	0	0	0.679634	0.631504	0.186709	0.633398	0	1.2355	0	1.16505	0	0.479282	0	0	0	0	0	0	0	2.10469	0.229511	0.547682	0.298654	0.225925	1.27792	0	0	0	0.16834	2.69418	0	0.725009	0	0.285371	0	1.07671	0.189599	0.291488	0
ENSG00000148680.15	HTR7	0	0	0	0	0	0	0	0	0	0	0	0	0	0	0	0	0	0	0.22612	0	0	0	0.918729	0	0	0	0	0	0	0	0	0	0	0	0	0	0	0	0	0	0	0	0	0	0	0	0	0
ENSG00000166033.11	HTRA1	0	0	0	0	0	0	0	0	0	0	0	0	0	0	0	0	0	0	0	0	0	0	0	0	0	0	0	0	0	0	0	0	0	0	0	0	0	0	0	0	0	0	0.285371	0	0	0	0	0
ENSG00000119912.15	IDE	3.7048	4.47894	1.31534	0.673104	5.40026	3.92015	5.65431	2.52965	1.09786	2.22315	3.03328	5.08073	5.83038	7.33115	6.6285	5.49351	4.08405	8.12407	14.0106	1.69639	3.47955	4.65877	4.06151	3.61288	4.04703	4.68332	11.915	2.5505	4.88038	6.34869	2.7727	6.86055	3.17628	9.64191	3.03692	7.73444	5.8232	5.72801	2.67879	0.506118	4.56773	9.54771	1.92918	5.70107	4.87516	5.45901	0.935778	5.9858
ENSG00000067064.11	IDI1	0	0	0	0	0	0	0	0	0	0	0	0	0	0	0	0	0	0	0	0.276051	0	0	0	0	0	0	0	0	0	0	0	0	0	0	0	0	0	0	0	0	0	0	0	0	0	0	0.291488	0
ENSG00000095574.11	IKZF5	0	0	0	0	0	0	0	0.22942	0	0	0	0	0	0	0	0	0	0	0	0	0	0	0	0	0	0.322986	0	0	0	0	0	0	0.341285	0	0	0	0	0	0.344189	0	0	0	0	0	0	0	0	0
ENSG00000134470.20	IL15RA	0.263777	0	0.494341	0	0	0	0	0	0	0	0	0.637895	0	0	0.559125	0	0.263939	0	0.291262	0	0.262044	1.38044	0	0	0	0.322986	0	0	1.48828	0	0	0	0	0	0	0.432068	0	0.183442	0	0	2.27069	0.816111	0	0	0	0	0	0
ENSG00000148798.10	INA	0	0	0	0	0	0	0	0	0	0	0	0	0	0	0	0	0	0	0	0	0	0	0	0	0.692705	0	0	0	0	0	0	0	0	0	0	0	0	0	0	0	0	0	0	0	0	0	0	0
ENSG00000068383.18	INPP5A	0	0.750769	0	0.673104	0.936971	1.2059	0.641459	0.22942	0	0	0.400444	1.43727	0	0.186709	0	0	0.35381	0.292181	1.80896	0	0.786132	0	0	0.584256	0	0	0.297039	0	1.98317	0.730003	0.547682	0.597308	0.495578	3.8027	0.27011	0	0.447303	1.01137	2.66341	0	0.28164	0	0.4682	0	0	0	0.291488	0.310998
ENSG00000198825.12	INPP5F	0	0.306634	0	0.604644	0.623215	0	0	0	0.281873	0	0	0	0.285577	0.336626	0	0.59408	0	0	0.22612	0	0	0	0	0.424084	0	0	0	0.3276	1.82814	0.479757	0	0.252936	0	0	0	0.681498	0.292743	0	0.703765	0	0	0	0	0	0	0	1.64932	2.79898
ENSG00000151151.5	IPMK	1.83733	0	1.1387	0	1.11398	0.606096	0	0	0.267055	0	0.503213	0	0	0	0	0	1.58931	0	0	0	1.47281	0	0.662992	0.292128	0	0.968959	0.891116	0.831783	0	0.250246	0	0.429836	0	1.55021	0	0.908664	0	0	1.07873	0	0.871274	0.384632	0	0.350407	0.267894	0.568798	0	0.34481
ENSG00000077943.7	ITGA8	0	0	0	0	0	0	0	0	0	0	0	0	0	0	0	0	0	0	1.14416	0	0	0	0	0	0	0	0	0	0	0	0	0	0	0	0	0	0	0	0	0	0	0	0	0	0	0	0	0
ENSG00000150093.18	ITGB1	4.96445	1.37538	0.988682	0	1.33816	1.2059	0	0.414318	2.47759	1.162	0.860867	0.438693	0.345927	0.542285	0	3.02829	0.35381	0	0	0.276051	0	0.170444	0.60789	0.983305	0.692705	0.791825	1.68911	0.176584	1.70658	0.229511	0.279556	0	0.451851	1.46642	0	0.216034	4.59676	0.67336	1.28665	0.364473	0.725009	0.855124	0	2.56788	3.4056	1.75885	0.329864	1.5866
ENSG00000123243.14	ITIH5	0	0	0	0	0	0	0.864499	0	0	0	0	0	0	0.168313	0	0	0	0	0	0	0	0	0	0	0	0	0	0	0	0	0	0	0	0	0	0	0	0	0	0	0	0	0	0	0	0	0	0
ENSG00000188385.11	JAKMIP3	0	0	0	0	0	0	0	0	0	0	0	0	0	0	0	0	0	0.620888	1.20659	0	0	0.340888	0	0	0	0	0	0	0.352232	0	0	0	0	0	0	0	0	0	0	0	0.580849	0	0	0	0	0	0	1.32742
ENSG00000171988.18	JMJD1C	1.33291	0.613268	1.1387	1.88239	2.94336	3.92765	2.09755	1.47462	1.61715	0.629299	1.29338	1.07659	2.73984	1.36545	1.50922	1.28781	1.07537	1.59074	1.36485	1.21602	3.14537	1.10712	0.918729	2.67964	1.27621	2.52176	2.18388	2.31319	0.649888	3.38867	1.09536	3.80049	1.39928	2.85966	1.21499	0.798387	1.78439	1.23879	3.59048	0	0.871274	0.556353	1.89505	7.65341	2.31605	2.1569	1.11964	2.2108
ENSG00000156650.12	KAT6B	2.01382	2.15202	3.01903	4.03863	2.58889	3.88717	0.432249	0.873158	3.08713	3.36622	2.1896	3.8815	3.46924	1.77622	0.241586	2.48755	3.0381	5.17398	0.454952	1.42034	6.04534	0.246697	2.18274	2.41573	3.02674	0.322986	2.87314	0.92208	3.18249	3.28064	0.559112	1.36554	3.5844	2.82813	1.0063	1.67365	1.83504	1.85574	2.19834	8.35088	1.01543	1.72947	1.50714	2.68399	2.04302	2.19379	0.276051	4.4352
ENSG00000156113.22	KCNMA1	0	0	2.03906	0	0	2.28651	0.648374	0	0	0.629299	2.83837	0.637895	0.285577	0	0	0.291251	0	2.30895	0	0.710484	0.262044	0	0	0	4.88646	0	0	0	4.8134	2.23965	0	0	0	0	3.08034	0.216034	0.292743	0	5.41385	0	0.28164	0	0	0.350407	5.14819	0	0	3.62385
ENSG00000120549.17	KIAA1217	0	0	1.31534	0	1.7372	1.16664	1.53888	0.45884	1.8842	0.547384	0	0.24094	0.571154	0.504939	0.724757	1.45626	2.39661	1.00638	0.228832	0.710484	0.234719	0.374669	0	0.292128	0	2.08928	0.7949	2.93324	1.54286	1.09209	0.279556	0	0.908495	0.188509	0.797622	0.454332	1.32553	0.718665	0.927074	0	0.56328	0.662808	0.502331	0.513576	0.267894	4.31982	0.276051	0.621996
ENSG00000165757.8	KIAA1462	0	0.713557	0	0	0	0	0.536854	0	3.11676	1.162	0	1.07659	0	0	0	0.302829	0	0	0	1.33369	0	0	0	0.424084	0	0.432484	0	0	0.859493	2.25075	2.2651	0	1.01906	0	2.62485	0	0	1.22635	0.359576	0.364473	0	0.268967	0.753571	3.93912	0	0	0	0
ENSG00000138160.5	KIF11	2.29968	4.14067	0.820996	1.27775	2.45689	4.05173	1.43427	0.414318	0.563747	1.12838	1.90264	2.20328	2.27798	2.48626	1.04146	2.15536	1.33931	3.21801	3.59536	1.7675	0.714001	1.08098	0.276394	2.60454	0.583509	2.55812	2.87623	0.26688	1.86161	1.59259	0	1.3104	2.74754	1.62364	2.79223	1.98883	1.32553	1.04158	2.91749	0.728946	0.572065	2.63281	0	4.22155	1.34631	1.73319	0.951215	1.24179
ENSG00000198954.7	KIF1BP	0.263777	0.343846	0	0	0.712794	0	0	0	0	0	0	0.318948	0.285577	0	0	0	0	0	0	0.228857	0.479282	0	1.26401	0	0	0.468839	0	0	0	0	1.10679	0	0.539305	1.3617	0	0	0.292743	0	0	0.364473	0	0	0	0.513576	0.682148	0.752382	0.291488	0.585987
ENSG00000138182.14	KIF20B	7.79169	15.9241	9.49868	15.2645	5.0908	15.7199	5.90228	8.88394	10.9391	4.02913	7.77757	17.8744	9.16752	13.371	18.1902	8.88335	15.0924	25.7276	22.8332	4.54607	7.8608	7.16057	3.83423	17.2381	6.96458	6.83516	24.2137	5.36787	20.159	13.7615	10.7998	6.63793	22.1688	18.2727	8.37986	11.5072	16.2878	12.8054	19.9042	8.26025	10.6976	21.5465	10.3891	17.7257	16.4947	13.2236	5.98283	9.73138
ENSG00000170759.10	KIF5B	3.34673	1.78231	1.63304	1.81393	3.25712	3.41388	1.1603	1.93346	4.63019	0	1.3041	1.23952	2.98124	1.79406	2.88278	2.36474	2.49474	2.53209	3.46612	1.79204	2.6016	8.50723	0.97383	8.0421	0.583509	1.26066	3.17224	2.60163	6.18015	2.89346	1.64305	1.65477	1.97128	1.80179	0.779616	1.0913	4.80679	2.46381	4.1272	1.23506	3.34551	0.961579	0.4682	3.67715	2.83043	6.91405	1.28108	3.08758
ENSG00000151657.11	KIN	0.263777	0	0.494341	0	0.896708	0	0.432249	1.47237	0.267055	1.162	0	0	0	0.373418	0.241586	0	0	0.422015	2.01252	0	1.00337	0.374669	0	0	0	0	1.58877	0	0	0.96915	0	0	0.225925	0.261939	0.27011	0.216034	2.01493	0.873237	0	0	0	0.192316	0	0.863982	1.3446	1.09389	0	0
ENSG00000067082.14	KLF6	0	0	0	0	0	0	0	0	0	0	0	0	0	0	0	0	0	0	0	0	0	0	0	0	0	0	0	0	0	0.280616	0	0	0	0	0	0	0	0.338014	0	0	0	0	0	0	0	0	0.276051	0
ENSG00000171798.17	KNDC1	0.541577	0	0	0	0	0	0	0	0	0	0	0	0	0	0	0	0	0	0	0	0	0.562004	0	0	0	0	0	0	0	0	0	0	0	0	0.257402	0	0	0	0	0	0	0	0	0	0	0	0	0
ENSG00000107929.14	LARP4B	9.98797	8.72288	4.89912	6.32028	17.4	11.6957	2.50798	2.67227	3.62124	1.75768	5.31492	3.27987	5.23165	11.7263	6.86925	5.09103	6.47498	2.96235	10.3384	2.04355	7.4635	9.49192	3.86775	0.983305	3.35433	9.03944	3.27788	8.36027	26.5065	4.72284	9.41346	4.58962	5.61524	11.496	5.91917	6.45632	10.4385	6.15397	22.1912	7.36697	9.80873	7.18524	0.285371	3.94544	14.8377	5.14237	5.08499	6.95041
ENSG00000196233.13	LCOR	1.33992	2.25807	0	0	2.32444	3.76938	1.5607	1.33726	0.267055	0	1.07712	2.47357	1.2402	1.55272	1.11741	0.59408	2.1368	2.73096	2.3635	0.758308	1.41816	2.32581	0.60789	0.691177	0	0.937678	3.17945	0.796633	1.84051	0.918045	0.559112	1.6642	3.47863	4.14818	0	1.06556	0.802255	1.19615	2.31922	0	0.84492	3.15015	1.4046	1.24837	1.6125	0.71469	0.552102	0.292993
ENSG00000198728.10	LDB1	0.263777	0	0	0	0	0.435243	0	0	0.267055	0	0	0.24094	0	0	0.79987	0	0	0	0	0.276051	0	0.187335	0	0	0	0	0	0.3276	0	0.229511	0	0	0.269653	0	0	0	0	0.16834	1.64623	0	0	0	0	0.350407	0.412543	0	0.276051	0
ENSG00000107902.13	LHPP	0	1.36404	0	0	0.448354	0	0.648374	0.414318	0.267055	0.629299	0.251606	0	0	1.43904	0.316699	0	1.07537	1.55823	0.454952	1.1042	2.68357	0.528223	0	0.798098	0	0.791825	0	0.26688	0	0.980249	0.559112	1.02714	2.05394	0.450448	0.779616	1.49763	0.534836	0.506354	0.344189	0.728946	0.56328	1.87276	0.753571	1.5648	1.07842	1.84627	0.329864	1.34543
ENSG00000107798.17	LIPA	0	0	0	0	0	0	0	0	0	0	0.251606	0	0	0	0.316699	0.332188	0.263939	0	0	0	0	0.170444	0	0.424084	0	0	0	0	0	0	0	0	0	0	0	0	0	0	0	0	0	0	0	0	0	0	0	0
ENSG00000172731.13	LRRC20	0	0	0	0	0	0	0	0	0	0	0	0	0	0	0	0	0	0.620888	0	0	0	0	0	0	0	0	0	0	0	0	0	0	0	0	0	0	0	0	0	0	0	0	0	0	0	0	0	0
ENSG00000148814.17	LRRC27	0.966777	0.406923	0	0	0.311608	0	0	0	0	0.581	0.251606	0.318948	0	0.373972	0	0.291251	0	0	0.517381	0.528821	0.262044	0.170444	0.932515	0	0	0.322986	0.298068	0.26688	0	0	0	0	1.17335	0	0	0.582353	0	0.183442	0.359576	0	0	0	0	0	0.269605	0	0	0
ENSG00000204740.10	MALRD1	0	0	0	0	0	0	0	0	0	0	0	0	0	0	0	0	0	0	0	0.528821	0	0.357779	0	0	0	0	0.297039	0	0	0	0	0	0	0	0	0	0	0	0	0	0	0	0	0	0	0	0.859026	0
ENSG00000107968.9	MAP3K8	0	0	0	0	0.625364	0	0.255961	0	0.563747	0	0	0	1.20266	0.336626	1.35984	1.63158	0.801624	1.0429	4.16784	0.228857	1.51761	0.621366	0	1.53934	0	0	0	0.353169	0.649888	0.229511	0	0.298654	0	0	0	3.65102	0	0.366884	0	0	0	0.82532	0	0.350407	1.3446	1.63261	0	0.292993
ENSG00000107643.15	MAPK8	4.2243	3.81134	3.27527	10.1535	6.42205	6.41677	2.33861	2.76511	1.89902	2.88607	0.754819	2.16155	2.63531	2.13124	3.27628	1.82318	2.15642	6.0788	1.13602	0	2.65625	1.41318	2.6322	3.79808	6.01595	0.645973	3.76837	1.03394	5.80682	1.2194	1.11822	1.44158	2.70861	18.5101	0.784914	1.58564	1.65516	3.63242	6.16684	9.07983	1.71619	1.36325	0.4682	5.01756	3.78389	2.89645	1.88699	3.84702
ENSG00000198060.9	MARCH5	0.270788	0	0	0	0	0	0	0	0	0.629299	0	0	0	0	0	0	0	0	0	0	0	0	0	0	0	0	0	0	0	0	0	0	0	0	0	0	0	0	0	0	0	0	0	0	0	0	0	0
ENSG00000165406.15	MARCH8	0	0	0	0	0.224177	0	0	0	0	0	0.400444	0	0	0.187263	0	0	0	0	0	0	0.234719	0	0.310838	0	0	0	0	0.176584	0	0	0	0	0.269653	0	0	0	0	0	0	0	0	0.278177	0	0	0	0.367168	0	0.34481
ENSG00000120539.14	MASTL	8.01831	5.77413	1.46535	1.81393	3.96991	10.6469	1.28983	2.25494	3.3865	1.09477	4.59873	2.16846	3.29959	4.28199	5.4343	1.82318	5.80246	6.36697	4.6464	2.43142	7.20145	6.2255	4.1304	1.72455	3.24513	9.46685	1.88684	2.89809	8.36417	4.06321	3.90235	4.05689	3.69976	3.34165	2.56342	2.8307	6.6556	3.16604	6.22311	1.96401	3.72281	8.77547	2.22643	6.04472	4.1699	15.3108	2.89202	2.03505
ENSG00000151224.12	MAT1A	0	0	0	0	0	0	0	0	0	0	0	0	0	0	0	0	0	0	0	0	0	0	0	0	0	0	0	0	0	0	0	0	0	0	0	0	0	0	0	0	0	0	0	0	0	0	0	0
ENSG00000065328.16	MCM10	6.8619	2.60192	5.55267	3.2286	4.42517	4.74265	0.511922	1.24295	0.53411	2.22315	2.4412	2.79944	1.82276	3.7776	6.27679	1.49099	23.6184	1.88292	7.09488	1.28713	2.53083	5.16801	1.5404	2.30881	0.583509	5.83999	2.8752	1.67955	3.32879	4.38819	2.49314	0.804525	4.53183	1.3097	0.784914	2.37637	3.69541	2.78538	5.58396	0	1.87792	4.26641	1.32431	7.32708	7.4377	11.0519	1.54169	2.26042
ENSG00000197771.12	MCMBP	0	0.613268	0	0	0.623215	0.513773	0.641459	0	0	0	0	0.679634	0	1.28968	0.875824	0.332188	0	0	0.969621	1.00982	0.479282	0.357779	0.642334	2.07353	0	0.322986	1.19021	0.59448	0.947544	0.500492	0	0	0	1.05281	0	0.659234	0.560161	0.506354	1.03257	0	0.580849	0	0.9364	1.92512	0.53921	1.51078	0	0.310998
ENSG00000156026.14	MCU	4.32052	12.3589	3.84874	0	17.3138	2.92558	2.65242	9.8477	0.281873	0	3.42628	10.4775	4.1839	8.24854	5.82695	3.48412	3.04224	23.4674	7.11658	7.02468	7.21893	5.76533	1.14002	2.28377	1.85972	4.28805	8.23971	6.27636	16.6701	13.0286	1.66591	4.65419	2.83979	21.7465	8.69339	10.6351	3.35202	3.27797	4.23798	1.82236	6.44355	7.21504	2.91159	31.4342	4.61411	1.79053	17.6022	1.62042
ENSG00000203791.14	METTL10	0	0	0	0	0	0	0	0	0	0	0	0	0	0	0	0	0	0	0	0	0	0	0	0	0	0	0	0	0	0	0	0	0	0.188509	0	0	0	0	0	0	0	0	0	0	0	0.379199	0	0
ENSG00000138111.14	MFSD13A	1.3259	0	0.406021	0	0.311608	0.217621	0	0	0.53411	0	0	0	0	0.186709	0	0	0	0.714196	0	0	0	0	0	0	0	0	0	0	0	0	0	0	0.341285	0.188509	0	0	0	0.16834	0	0	0	0.192316	0	0	0	0	0	0
ENSG00000198408.13	MGEA5	2.8714	5.04922	4.40501	2.48704	4.63339	9.48773	4.22695	5.98604	1.94482	12.1063	3.70996	6.55572	2.70707	4.56067	5.99595	6.97293	5.15529	7.00413	4.42028	1.23867	6.25273	3.81419	5.0009	8.92208	2.33404	7.66885	8.33577	3.32557	3.08571	12.2282	1.39778	3.26382	11.2036	5.56741	3.34304	7.28254	2.45741	1.19748	3.20013	1.82236	5.01778	4.73335	2.07773	5.94276	5.27315	5.15995	1.88699	3.20922
ENSG00000170430.9	MGMT	0	0	0	0	0	0	0	0	0	0	0	0	0	0.187263	0	0.302829	0	0	0	0	0	0	0	0	0	0	0	0	0	0	0	0	0	0	0	0	0	0	0	0	0	0	0	0	0	0	0	0
ENSG00000107745.18	MICU1	0.241694	2.9975	0	0	1.38533	0.652864	0.511922	1.75158	0.53411	1.09477	0.251606	1.11833	0.285577	1.06617	0.241586	0	0	1.88292	0	1.19211	1.96957	0.545114	0.331496	2.81478	0.583509	0.864969	2.28437	0.3276	0	1.78063	0	0	0.539305	3.28387	0.496798	1.64792	0.292743	1.02781	1.40753	0.364473	0	0.384632	0	0.700813	0.269605	2.93494	0	1.34543
ENSG00000107789.15	MINPP1	0.270788	0	0	0	0.311608	0	0	0.691278	0	0.581	0	0.318948	2.48041	0	0	0.332188	0	0	0.291262	0.276051	0	0	0	0	0	0	0.891116	0.529753	0.352232	0	0	0	0	0.340425	0	0	0	0.16834	0.344189	0	0	0	0	0.384392	0.267894	0	0.276051	0
ENSG00000148773.13	MKI67	0	0.306634	0	0	0	0.645361	0	0.45884	0	0	0.251606	0	0	0.187263	0	0.302829	0	0.422015	0	0	0	0.246697	0	0	0	0	1.09297	0	0	0	0.279556	0	0	0	0.239396	0	0.585486	0.183442	0.688377	0.364473	0	0	0	0	0.267894	0	0	0
ENSG00000150051.13	MKX	0	0	0	0	0	0	0	0	0	0	0	0	0	0	0	0	0	0	0	0	0	0	0	0.424084	0	0	0	0	0	0	0	0	0	0	0	0	0	0	0	0	0	0	0	0	0	0	0	0
ENSG00000078403.16	MLLT10	3.11205	1.32683	1.64199	0.673104	0.984138	3.32156	3.3943	0	1.08304	1.09477	2.20776	1.55702	3.26682	1.81467	5.17731	2.3941	2.60423	0.913069	4.02504	1.58646	4.17607	1.54879	1.85124	0	0	1.5473	3.37512	1.3104	4.86797	2.11671	0.827238	1.9077	5.55569	0.974327	0.957586	2.3729	4.44702	0.67336	2.76584	0.364473	1.14413	1.30502	2.40926	4.31675	8.22682	4.37555	1.54169	2.10277
ENSG00000155229.20	MMS19	0.812365	0.406923	0.326655	0	0.448354	0.256886	0	0	0	0	0.286956	0	0.345927	0.373972	0	0.291251	1.36873	0.913069	0.452239	0.228857	0	0.357779	0	0.848167	0	0	0.894205	0	0.892968	0.739639	0	0	0.495578	1.24638	0	0.355187	0.267418	0.858136	0.719152	0	0.290425	0	0	0.768784	0.53921	0	0.582975	0
ENSG00000171160.17	MORN4	0	0	0	0	0	0	0	0	0	0	0.573911	0	0	0	0.483172	0	0	0	0	0	0	0	0	0	0	0	0	0	0	0	0	0	0	0	0	0	0	0	0	0	0	0	0	0	0	0	0	0
ENSG00000150054.18	MPP7	0	0	0	0	1.11398	0	0.984008	0.22942	0	0	0	0.318948	0.571154	1.23338	0	0.332188	1.07537	0.714196	1.56028	0.252769	0.262044	1.09892	0	5.09537	0	2.08928	0	0.176584	0	0.479757	0	0	0	1.50326	0	0	0	0.16834	1.37675	0	1.00665	2.54558	0.4682	0	0.535787	2.73933	0	0.292993
ENSG00000260314.2	MRC1	0	0	0	0	0	0	0	0	0	0	0	0.438693	0.285577	0	0	0	0	0	0	0	0	0	0	0	0	0	0	0	0	0.500492	0	0	0.269653	0	0	0	0	0	0	0	0	0	0	0	0	0	0	0
ENSG00000055950.16	MRPL43	0	0	0	0	0	0	0	0	0	0	0	0	0	0	0	0	0	0	0	0.228857	0	0	0	0	0	0	0	0	0	0	0	0	0	0	0	0	0	0	0	0	0	0	0	0	0	0	0	0
ENSG00000148450.12	MSRB2	0	0	0	0	0	0	0.255961	0	0	0	0	0	0	0	0.241586	0	0	0	0	0	0	0.374669	0	0	0	0	0	0	0	0	0	0	0.451851	0	0	0	0	0	0	1.51835	0	0.268967	0	0	0	0.379199	0	0
ENSG00000166343.9	MSS51	0	0	0	0	0	0	0	0	0	0	0	0	0	0	0	0	0.263939	0	0	0	0	0.170444	0	0	0	0	0	0	0	0	0	0	0	0	0	0	0	0	0	0	0	0	0	0	0	0	0	0
ENSG00000148824.18	MTG1	0.241694	0.613268	0	0	0	0.776948	0.320729	0.828636	0.281873	0.581	0	0.318948	0	0	0	0	0	1.0429	0.582524	0	0	0	0	0	0	0	0	0.176584	0	0	0.279556	0	0.793135	1.28297	0	0	0	0.351782	0	0	0.28164	0	0.502331	0	0	0.379199	0	0.292993
ENSG00000107951.14	MTPAP	0.783271	0.750769	0	0	0.311608	1.50205	0.216125	0	0.53411	0.581	0	0	1.59753	0.168313	1.04146	0	0	0.292181	0.686496	0	0.234719	0.170444	0	2.0449	1.16702	0	1.19021	0.504184	0.561837	0.500492	0.827238	0	0	0	0	0.227166	0.447303	0.887005	0.719152	0.364473	0.572065	0.470492	0	0	0	1.65667	0	0.87898
ENSG00000119950.20	MXI1	0	0	0	0	0	0	0	0	0	0	0	0.24094	0	0	0	0	0	0	0	0	1.31022	0	0	0.399049	0	0	0	0	0	0	0	0.298654	0	0.188509	0	0	0	0	0.703765	0.364473	0	0	0	0	0	0	0	0
ENSG00000095777.15	MYO3A	0	0	0	0	0	0	0	0	0	0	0	0	0	0	0	0	0	3.14897	5.71999	0	0	0.246697	0	0.292128	0	0.968959	0	0.26688	0	0	0	0	0	0.188509	1.05502	0	0	0	0	0	0	0	0	0.384392	0	0	0	0
ENSG00000138119.16	MYOF	0.270788	12.583	1.31534	2.5555	20.6679	8.9572	14.644	5.52117	7.48124	6.42036	2.77095	15.6363	5.36375	5.36656	6.07106	10.1943	17.128	31.652	26.4492	5.35094	12.1516	4.57327	7.3094	7.35452	3.82864	2.62575	8.83584	11.0498	13.1987	18.7591	6.90889	2.6516	10.2235	27.4384	6.84605	6.07991	18.4149	10.2625	16.3892	1.59954	7.56898	22.855	7.99173	24.8284	5.2663	13.8842	11.1062	8.72627
ENSG00000138347.15	MYPN	4.16716	0.65048	1.3947	0	0	0	0	0	0	2.35336	0.286956	0.24094	0	0	0	8.46542	1.77318	0	6.56037	0	4.58322	0.170444	0.276394	0	4.19376	0	0.297039	0	3.37099	0	0	0	0	0.638958	0	0	0	0	0	0	0	0	0	0	1.21793	0	0	0
ENSG00000266412.5	NCOA4	0.805354	1.12048	1.80072	0	0.896708	1.2059	0.320729	0.414318	1.37973	0	1.47757	1.67821	1.19126	0.168313	0.724757	2.8491	0.617749	0	2.00981	0	0	0.246697	0.310838	0.399049	0	0.468839	0.596137	0.86136	1.86161	2.04197	0.559112	0.597308	2.202	3.24198	0.736195	0.4432	0.292743	1.34939	1.47919	0.506118	0	2.09488	0	1.63277	1.34289	2.49159	0.912839	2.14098
ENSG00000166507.17	NDST2	0	0	0	0	0	0	0	0	0	0	0	0	0	0	0	0	0	0	0	0	0	0	0	0	0	0	0	0	0	0.229511	0	0	0	0.377018	0	0	0.447303	0	0	0	0	0	0.285371	0	0	0	0	0
ENSG00000078114.18	NEBL	0	0	0	0	0.623215	0	1.29675	0.506379	0	0	0	0.24094	0.691854	1.96293	1.91812	0.582502	3.0381	0.292181	1.55757	0.504909	0	0.663838	0.276394	0	0	0	0	0	0	1.01062	0	1.15833	0	0	0.27011	0.227166	2.22014	0.16834	0	0.506118	1.41698	0.855124	0.9364	0.350407	0.807103	4.43403	0	1.37924
ENSG00000173848.18	NET1	0	0	0	0	0	0.513773	0	0	0	0	0	0	0	0	0	0	0	0	0	0	0	0	0	0	0	0	0	0	0	0	0.279556	0.429836	0	0.261939	0	0	0.292743	0	0	0	0	0	0	0	0	0	0	0
ENSG00000107954.10	NEURL1	0.541577	0	0	0	0	0.388474	0	0	0.281873	0	0	0.318948	0	0	0	0	0	0	0	0	0	0	0	0.584256	0	0	0	0	0	0.459022	0	0	0	0	0	0	0	0	8.55771	0	0	0	0	0	0	0	0	0
ENSG00000077150.18	NFKB2	0.241694	0	0	0	0	0	0	0	0.267055	0	0	0	0	0	0	0	0	0	0	0	0	0	0	0	1.38541	0	0.496832	0	0	0	0	0	0	0	0	0	0.267418	0	0	0	0	0	0	0	0	0	0.276051	0
ENSG00000196865.4	NHLRC2	1.29575	2.59057	0.820996	0.604644	2.01069	0.435243	1.2649	0	0.267055	0.547384	0	1.11978	0.285577	0.72844	2.15971	0.332188	0.811431	2.99486	2.7506	0.710484	1.18344	0.698667	0	0.399049	1.38541	0.432484	2.18594	0.831783	0.352232	0	0.559112	2.73109	0.539305	1.5868	0	1.39187	0.982139	1.01404	1.42292	0.506118	1.41698	0.748669	0	0	1.48412	0.708674	0.291488	1.31161
ENSG00000152465.17	NMT2	0.263777	0.750769	0.406021	0.673104	0	0.513773	0	0.22942	0.53411	1.2103	1.00643	0.559888	0.285577	0.542285	0	0.885331	0.617749	0	0.912616	0.78096	0.714001	0	0.331496	1.1403	1.38541	0.864969	3.86665	0	2.86373	1.84283	1.37492	0.252936	1.64582	1.46667	1.28912	0.454332	0.740046	0.521456	0.344189	0	0.56328	0.192316	0.502331	1.21439	1.07671	0.341506	0	1.46497
ENSG00000173145.11	NOC3L	0.534565	0.306634	0	0	0.712794	0.435243	0	0	0	0	0	0.679634	0	0.186709	0	0.664375	0.527878	0	1.03476	0.986536	0.262044	0	0	0.424084	0	0.432484	1.5898	0	2.21385	0.250246	0.331066	0	0	0.717444	0.27011	0	1.43839	0.183442	0.703765	0	0.56328	0.470492	0	0	0.53921	0.929951	0	0
ENSG00000166197.16	NOLC1	4.57028	4.10346	0	1.20929	2.50406	4.35417	1.21815	0	1.35009	1.162	1.00643	1.67966	1.65788	4.5824	0.559125	0.967204	2.96217	3.44516	2.57144	0.552102	0.758807	2.05143	1.98986	0.848167	3.71945	1.72443	3.47237	3.10983	4.39422	1.72952	2.03705	1.60905	4.18431	9.44329	1.25841	2.22713	2.53339	1.34939	0.344189	0	1.99783	2.70947	0	3.03439	2.68578	5.2626	0.989591	0.87898
ENSG00000107833.10	NPM3	0	0	0	0	0	0	0	0	0	0	0	0	0	0	0	0	0	0	0	0	0	0	0	0	0	0	0	0	0	0	0	0	0	0	0	0	0	0	0	0	0	0	0	0	0	0	0	0
ENSG00000185737.12	NRG3	0	0	0	0	0.224177	0	0	0	0	0	0	0	0	0	0	0	0	0	0	0	0	0	0	0	0	0	0	0	0	0	0	0	0	0	0	0	0	0	0	0	0	0	0	0	0	0	0	0
ENSG00000099250.17	NRP1	0	0.306634	1.72136	0.604644	2.49931	2.97864	1.43427	1.93647	1.67776	0	0	3.83284	0.285577	0	0.483172	2.41105	0	0	0.454952	0.252769	0	0.493394	1.45086	0	0	1.29745	5.35818	0.710345	1.89509	2.58683	2.48171	1.94745	1.36514	0.188509	0.957586	0.908664	1.96428	2.20752	0.567498	0	0	0.192316	2.94587	2.7891	0	0.562783	2.87607	0.310998
ENSG00000107672.14	NSMCE4A	0.754177	0.613268	0.326655	0	0	0	0	0.22942	0.563747	0	0.251606	0.24094	0	0.504939	0	0	0	0.620888	0.746213	0	0	0.434032	0	0	0	0.937678	0.594077	0.680768	0	0	0	0	0.539305	0.827467	0	0.454332	0.585486	0	0	0.506118	0	0	0	0	0	1.09389	0.276051	0.585987
ENSG00000241058.3	NSUN6	1.33992	1.87125	0	1.27775	1.25073	6.11312	1.76192	0.276959	0.563747	0	0.538562	1.99716	2.78879	1.30752	4.76757	1.20594	0.981367	1.16873	0.975045	0.252769	0.976045	1.59126	0.310838	1.24722	3.13594	0.468839	2.08236	0.92208	0.561837	0.280616	1.11822	1.70049	1.30454	0.638958	0.54022	1.21932	1.32553	0.888339	2.34999	1.09342	0.84492	1.76631	1.03894	3.04431	4.44464	0.708674	1.21183	1.18998
ENSG00000076685.18	NT5C2	0.527554	2.17788	0.494341	0	0.535785	0	0.728047	0.643738	1.47132	0.581	0.790169	0.24094	0.691854	0.186709	1.35984	0.605658	0.263939	2.01276	2.43135	0.228857	0.262044	0.187335	0.331496	0	0	1.40652	0	0.176584	0.649888	0.280616	0	0.252936	0	1.96407	0.239396	0.809519	0.447303	0	0.719152	1.88283	0.853705	1.23055	0.856112	2.56472	1.90179	2.88362	0.276051	2.13878
ENSG00000166321.13	NUDT13	0	0	0	0	0	0	0	0	0	0	0	0	0	0	0	0	0.273746	0.620888	0	0	0	0	0	0	0	0	0	0	0	0.250246	0	0	0	0	0	0	0	0	0	0	0	0	0	0	0	0	0	0
ENSG00000165609.12	NUDT5	0	0	0	0	0.535785	0.217621	0	0.553919	0.876596	0	0	0.318948	0.631504	0.187263	0	0.302829	0.263939	0	0	0	0	0.170444	0	0	0	0.468839	0.297039	0.176584	0.297656	0	0	0	0.269653	0	0	0	0	0	0.359576	0	0	0	0.285371	0	0	0.367168	0.659727	0
ENSG00000065154.11	OAT	0.812365	1.30096	1.63304	1.88239	1.25073	2.0284	1.72208	2.57418	2.00543	0	1.20133	1.59474	0.966029	0.934654	5.6588	0.635017	1.08518	1.82614	0.457664	3.48843	0.469438	0.715558	0.310838	0.823132	0.583509	0.791825	0.595107	0.706337	0.561837	0.781108	2.516	0.859673	1.51464	0.979383	1.55923	0.582353	1.27488	1.21125	1.73633	2.38894	1.12656	0.384632	0	0.734799	2.56254	3.21831	1.94081	2.2266
ENSG00000107960.10	OBFC1	0.270788	0	0	0	0.625364	0.513773	0	0	0	0	0	1.19633	0.285577	0	0	0.937846	0	0	0	0	0	0	0.331496	0	0	0	0	0	0	0.250246	0	0.859673	0.225925	1.1313	0.27011	0	0	0.338014	0.359576	0	0	0	0	0	0.412543	0.379199	0	0.621996
ENSG00000138315.12	OIT3	0	0	0	0	0.224177	0	0.320729	0	0	0	0.251606	0	0	0	0	0.332188	0	0	0.22612	0	0	0	0	0	0	0.432484	0	0.26688	0	0.459022	0	0	0	0	0	0	0	0	0	0	0	0.192316	0	1.92196	0	0	0	0
ENSG00000152463.14	OLAH	0	0	0	0	0	0	0	0	0	0	0	0	0	0	0	0	0	0	0	0	0	0.511333	0	0	0	0	0	0	0	0	0	0	0	0	0	0	0	0	0	0	0	0	0	0	0	0	0	0
ENSG00000123240.16	OPTN	0.263777	0	0.812043	0	0.311608	0	0	0.22942	0.594723	0.547384	0	0	0	0.186709	0	0.59408	0	0	0.22612	1.1682	0	0.246697	0	0.584256	0	0	0	0	1.0567	0	0	0.298654	0.539305	0.188509	0	0.227166	0.447303	0.33668	0.359576	0	0.290425	0	0	0.350407	1.21965	0.354337	0	0
ENSG00000122884.12	P4HA1	0.263777	1.02019	1.22702	0.673104	1.65667	0.909751	0.511922	2.67003	0.801166	0.629299	0	0.878836	0	0.373972	0.316699	2.43504	0	4.26492	1.94195	2.25101	2.7557	0.945364	0	1.16851	0.583509	0	1.98511	0	0.947544	0.561233	0.559112	2.29182	3.27582	0.680851	1.03702	2.23374	2.3952	0.550325	4.72854	0.728946	1.41698	0.268967	0.753571	5.21472	2.97166	0	0.621351	1.75796
ENSG00000107719.8	PALD1	1.3259	1.22654	0	0	0	0.256886	0	0	0	0	0	0	0	0	0	0	0	0	0	0	0	0.246697	0	0	0	0.468839	0	0	0.595312	0.280616	0	0	0	0	0	0	0	0	0	0	0	0	0	0	0	0	0	0
ENSG00000152782.16	PANK1	0	0	0.494341	0	0	0	0	0.276959	0	0	0	0	0	0	0	0	0.627556	0	0.228832	0	0	0.340888	0	0	0	0	0	0	0	0	0	0	0	0	0	0.432068	0.714721	0	0.344189	0	0.28164	0	0	0	1.36087	0	0	0
ENSG00000198682.12	PAPSS2	0	1.37538	0	1.88239	0	0.256886	0	0.414318	0	1.09477	0.251606	0.481881	1.03778	0	0.241586	0.291251	0.901303	0.84403	0.681071	0.457715	0.524088	2.3427	0.331496	0	0	0	0.297039	0.26688	0.297656	0.561233	0.279556	1.57873	0.341285	1.87522	0.478793	0	0	0.366884	0.703765	0	0	0.855124	0.4682	0.384392	0.53921	0	0.291488	0
ENSG00000148498.15	PARD3	5.25732	36.88	6.15276	1.88239	25.5653	20.5606	8.37423	5.06233	12.4822	3.06458	3.80528	11.0527	10.1254	6.5102	20.5753	27.9417	8.07978	23.1182	32.6747	7.48176	18.5547	4.65772	9.73405	9.57826	4.52135	8.6378	41.7856	6.11581	26.5909	22.6719	5.31735	6.66825	10.0971	4.32128	7.31424	16.9168	46.1136	6.03849	8.67859	25.6134	10.0971	13.2258	8.18659	21.0117	9.4576	18.2542	8.95108	9.95445
ENSG00000227345.8	PARG	5.42785	6.11797	5.39393	1.27775	11.1562	8.45268	3.52384	3.30998	3.63606	3.99977	6.09446	4.67541	6.09315	3.59034	8.86332	6.99139	7.45789	8.84228	4.57583	1.26259	8.31718	1.32768	6.48709	9.69197	2.66162	3.17281	5.36126	3.94161	2.72111	6.24212	6.38986	2.48412	4.25594	13.5806	4.10995	3.30383	5.50252	6.82999	4.39974	2.47013	5.75368	9.28933	2.00947	5.54106	9.05962	2.54211	2.92988	9.67957
ENSG00000239883.8	PARGP1	1.04705	0.343846	2.2774	0	5.39765	2.97864	0.216125	1.8414	1.97445	2.96798	1.51292	0.24094	0.631504	1.31029	2.30993	2.73166	1.07537	1.13621	1.20117	0	0.966201	0.77492	1.19512	1.62123	1.85972	0.322986	2.87829	0.3276	0.892968	0.760374	0.827238	1.81627	0.76523	2.18411	0.496798	0.432068	1.095	0.676028	5.61167	2.5079	2.14199	0.940985	0.4682	2.33358	3.09661	2.8784	0.828154	1.98323
ENSG00000108187.15	PBLD	0.270788	0.343846	0	0	0	0.870486	0.320729	0.276959	0	0	0	0.481881	0	0.187263	0	0	0	0.292181	0	0	0	0	0.310838	0	0	0	0.496832	0	0	0	0	0	0.225925	0	0	0	0	0	0	0	0	0	0	0	0	0.189599	0.276051	0
ENSG00000166228.8	PCBD1	0	0	0	0	0	0	0	0	0	0	0	0	0	0	0	0	0	0	0	0	0	0	0	0	0	0	0	0	0	0	0	0	0	0	0	0	0.447303	0	0.359576	0	0	0	0	0	0	0	0	0
ENSG00000150275.18	PCDH15	0	0	0	0	0	0	0	0	0	0	0	0	0	0	0	0	0	0	0	0	0	0	0	0	0	0	0	0	0.297656	0	0	0	0	0	0	0	0	0	0	0	0	0	0	0	0	0	0	0.310998
ENSG00000180628.14	PCGF5	0	0.65048	0	0	0.311608	0	0.57669	0	0	0.581	0	0	0.285577	0.504939	0.79987	0	0	0.876544	0	0	0	0.246697	0.331496	0	0.583509	0	3.07927	0	0	1.75026	0.559112	0	0.269653	1.28322	0	0	1.32553	0.733767	0	0	0	0	0	0.350407	0	0	0	0
ENSG00000156374.14	PCGF6	0.769248	2.86557	0	0.673104	0.224177	0.217621	0.641459	0.276959	0	0	1.80731	1.23952	0.571154	3.00904	0.483172	5.20847	0.801624	4.20011	0.22612	0.252769	0.524088	0.979145	0.310838	0	0.692705	2.37591	2.48195	0.3276	2.35647	0	0.559112	0	1.44301	3.12136	0	0.4432	0.267418	0.33668	0.359576	0	1.12656	0.461283	0.753571	3.04431	1.3446	2.61228	0	1.37924
ENSG00000148843.13	PDCD11	8.00324	9.20441	2.613	4.43789	1.51517	4.91593	2.28076	4.78761	9.88976	2.93436	3.82345	9.83672	3.27822	10.1908	6.44242	10.6857	8.70166	12.6609	8.00478	4.24611	7.53647	6.27007	7.90262	3.95507	5.46997	3.71436	7.93531	3.19611	20.6873	5.28696	1.93403	8.00348	7.00828	12.7168	3.35045	10.6507	3.68385	2.64591	3.51882	1.37671	6.7273	5.514	2.8313	12.4979	12.4096	11.9847	5.72178	6.26298
ENSG00000150593.17	PDCD4	0.270788	0	0	0	0	0.513773	0	0	0.53411	0.629299	0	0.318948	0	1.12192	0.800711	3.02292	0.263939	0.913069	3.24709	0.504909	0.496763	1.64298	0.331496	0.424084	0.583509	0.901323	1.4905	0	0.595312	0.561233	0.279556	1.11261	0.88059	0.979383	0	0.582353	0	0.366884	0.344189	0	0.580849	0.845915	0	1.08521	0.269605	1.82141	0	0.932994
ENSG00000107438.8	PDLIM1	0.241694	0	0	0	0	0	0	0	0	0	0.251606	0.637895	0	0	0	0	0	0.292181	0.686496	0	0	0.528223	0	0.424084	0	0	0	0	0	0	0	0	0.610937	0	0	0	0	0	2.86122	0	0	0	0	0	0.269605	0.367168	0	0
ENSG00000148459.15	PDSS1	0.527554	0.919902	0	0	0.802374	2.12194	0.767883	0.276959	0.53411	0	0.800889	0	0.345927	1.55272	0	0.664375	0.537685	0	1.87681	0.228857	1.57226	0.417141	0	0	1.38541	0	0.595107	0.176584	2.3019	0	0.547682	0.298654	0.341285	0	0	0	1.03279	0.351782	1.60006	0.364473	0	0	0	1.92512	0.807103	0.898274	0.552102	0.34481
ENSG00000186862.18	PDZD7	0	0	0	0	0	0.217621	0	0	0	0	0	0.318948	0	0	0	0	0	0	0	0	0	0	0	0	0	0	0	0	0	0	0	0	0.269653	0	0.27011	0.355187	0	0	0	0	0	0	0	0	0	0	0	0
ENSG00000165650.11	PDZD8	0	0.343846	0	0	0	0.909751	0.641459	0	0	0	0.286956	0	1.2402	0	1.35984	0.291251	0.263939	0.620888	0.228832	0	0	0	0	0	0.583509	0.432484	0.298068	0.26688	0	0.530862	0	0	0.903702	0.377018	0	0.582353	0.534836	1.37826	0.703765	0	0.28164	0	0	0	2.02675	0	0.329864	0
ENSG00000170525.20	PFKFB3	0	0.406923	0	0	0.224177	0	0.216125	0	0.281873	0	0	0.438693	0	0	0.559125	0	0	0	0	0.276051	0.524088	0.986788	0	0	0	0.791825	0.298068	0	0.859493	0.229511	0.279556	0.505871	0	0	0	0	0.292743	0.366884	1.06334	0	0.290425	0	0	0.350407	0.53921	0.683013	0.276051	0
ENSG00000067057.16	PFKP	1.77213	3.35269	4.00771	5.64718	1.86965	7.60349	1.61056	5.29175	1.7074	4.67736	0	1.2047	3.60134	3.98492	4.15042	4.22348	0	4.90607	1.62	2.82451	1.31022	7.05608	1.55419	0.716212	1.75053	1.94343	1.88581	0.947649	4.48594	6.15483	1.94546	1.19462	11.3131	2.40921	2.27742	3.00325	10.4036	4.29201	3.14386	0.364473	3.14196	5.80139	1.79251	11.3033	13.4161	1.81459	2.87658	3.12359
ENSG00000107537.13	PHYH	1.08315	0.406923	0	0	0.401187	0	0.216125	0.783339	0	0	0	0	2.55216	0	0.559125	0	0	0.620888	0.291262	0.228857	0.479282	0	0	0	0	0	0	0.3276	0	0.561233	0	0.551589	1.17335	1.31956	0	0.4432	0.534836	0	0.359576	0	0	0.576948	0	0	1.36258	0	0	0
ENSG00000155629.14	PIK3AP1	0	0	0	0	2.54647	0	0	0	0	0	0	0	0	0.186709	0	0	0	0	0	0	0	0	0	0	0	0.468839	0	0.3276	0	0	0.279556	0	0	0	0	0	0	0.16834	0	0	0	0	0	0	0	0.170753	0	0
ENSG00000150867.13	PIP4K2A	1.85941	1.40125	0	0.673104	1.56924	2.20798	0.432249	0.691278	1.33528	0	0.903657	1.60166	4.57877	1.10241	0	0.873753	1.25511	1.75309	1.20659	0.481627	0.731482	1.05645	0	0.399049	0.583509	0	1.68911	0.771064	1.4548	1.9494	0	0.252936	2.29569	1.28322	0.239396	0.432068	2.44585	0.33668	1.60006	0	1.14413	0	0	1.59878	0.267894	1.65066	0.291488	0.292993
ENSG00000107959.15	PITRM1	1.31888	3.50471	1.1387	1.27775	0	3.05717	0.89742	2.30325	0.281873	2.91968	0.400444	2.59187	2.01521	1.75671	5.51278	1.17658	0.70762	0.913069	1.04019	1.21539	0.234719	0.808701	0.331496	1.27225	0	3.56387	0.596137	0.533761	6.85481	3.97592	0	0.758807	1.17335	3.34695	1.0063	0	0.827579	0.688462	1.60006	0	2.61382	2.51715	0.856112	1.72796	3.37135	0.354337	0	0.930796
ENSG00000138308.5	PLA2G12B	0	0	0	0	0	0	0	0	0	0	0	0	0	0	0	0	0	0	0	0	0	0	0	0	0	0	0	0	0	0	0	0	0	0.340425	0	0	0	0	0	0	0	0	0	0	0	0	0	0
ENSG00000122861.15	PLAU	0	0	0	0	0	0	0	0	0	0	0	0.637895	0	0	0	0	0	0	0	0.252769	0	0	0	0.424084	0	0	0	0	0	0	0.559112	0	0	0	0	0	0	0	0	0	0	0	0	0	0	0	0	0
ENSG00000138193.15	PLCE1	0.541577	3.64221	3.01879	0	0.224177	2.62821	6.75987	0.276959	1.94482	0.581	3.96484	0.679634	0.285577	0	0	1.5435	0	0.292181	5.03892	0	3.46207	4.40073	0	0.691177	0.692705	0.432484	2.08236	1.03394	3.45904	1.77099	0.279556	0.298654	1.98231	8.88812	1.08044	1.49763	1.16202	0	0	0.506118	0.290425	0.855124	1.79236	7.29309	0.537499	5.69392	0	5.44953
ENSG00000107679.14	PLEKHA1	0.783271	1.02019	0	0	0.311608	1.2059	0.432249	0	0.563747	0	0.400444	0.878836	0	0.504939	0	1.91125	0	0.584363	0.454952	0.457715	0	0.493394	0.552789	1.64626	0	0.322986	0.595107	0.176584	0.595312	0.459022	0	0	0	1.31475	0.54022	0.710375	0.447303	0	0.719152	0	1.14413	1.01764	0	0	0.269605	1.27146	0.659727	0.621996
ENSG00000148735.14	PLEKHS1	0	0	0	0	0	0	0	0	0	0	0	0	0	0	0	0	0	0	0	0	0	0	0	0	0	0	0	0.26688	0	0	0	0	0	0	0	0	0	0	0	0	0	0	0	0	0	0	0	0
ENSG00000203805.10	PLPP4	0	0	0.326655	5.85256	0	0.902247	0	0.22942	0	0	0	0	0	0	0	0	0	0	0	0	0	0	0	0	0	0	0	0	0.649888	0	0	0	0	0	0	0	0	0	0	0	0	0	0	0	0	0	0	0
ENSG00000120594.16	PLXDC2	0	0	0	0	0	0	0	0.643738	0	0	0	0	0	0	0	1.52035	0	0	0	1.2393	1.1736	0	0	0	0	0	0	0	0	0	0	0	0	0.754037	0	0	0	0.338014	0	0	0	0	0.4682	0.513576	0	0	0	0
ENSG00000203837.4	PNLIPRP3	0	0	0	0	0	0	0	0	0	0	0	0	0	0	0	0	0	0.422015	0	0	0	0	0	0	0	0	0	0	0	0	0	0	0	0	0	0	0	0	0	0	0	0	0	0	0	0	0	0
ENSG00000166169.16	POLL	0	0	0	0	0.224177	1.11987	0	0	0	0	0	0	0	0	0	0	0	0	0	0	0.524088	0	0	0	1.38541	0	0	0	0	0.459022	0	0	0.269653	0	0	0	0	0.50502	2.06207	1.09342	0	0.278177	0	0.768784	0	0	0.276051	0.292993
ENSG00000148606.12	POLR3A	0.98886	3.00884	0.820996	0	1.47276	3.50499	0.216125	1.33502	0.801166	1.64215	0	2.80636	0.917081	1.4028	1.99155	1.95219	1.24531	1.49743	1.16505	0.552102	2.64861	1.02162	0.276394	0.823132	0	0	2.48195	0	2.00424	0	0.547682	1.05746	2.89081	1.95877	0.27011	2.39516	2.12779	1.20858	1.40753	1.09342	1.00665	0.461283	0	0	0.825085	3.30131	0	0.292993
ENSG00000180817.11	PPA1	0	0.613268	0.494341	0	1.16115	0.949016	0.320729	0	0	0	0	0	0	0.355022	0	0	0	0.876544	0.452239	0.505539	0.469438	0.170444	0.621676	0.584256	0	0.432484	0.298068	1.84416	0.297656	0.530862	0	0	0.808958	1.65012	0.514804	0	1.30021	0.183442	0	0.87059	0	0	0.4682	2.01716	0.807103	0	0	0.689619
ENSG00000175470.18	PPP2R2D	1.71394	0	0.406021	0	0.623215	0.513773	0.767883	0.828636	0.267055	1.162	0.286956	0	0	2.89758	0	2.20788	0.981367	0.913069	1.04019	0.481627	1.50013	0	1.94766	0.424084	0	0.322986	3.17651	0.353169	0.947544	0.459022	1.67734	0	1.78908	0.979383	0.509506	0	0.560161	0.688462	1.75172	0.728946	1.59628	2.4703	0.502331	1.5648	0.537499	0.708674	0	3.24303
ENSG00000107758.15	PPP3CB	0.263777	0.613268	0.406021	0	0.448354	0	0	0.414318	0.267055	0.547384	0	0.757641	1.72964	0.56179	0.241586	0.332188	0.537685	1.68806	0.228832	0.828154	0	0.170444	1.927	0.292128	0.692705	0	0.7949	0.3276	0.595312	0	0	0	0	0.94279	0.509506	0	0.878229	0.16834	0.359576	0	0.28164	0.556353	0	0	0.805392	0.367168	1.15802	0
ENSG00000148840.10	PPRC1	0.483388	0	0	0	0	0.388474	0	0	0	0	0.251606	0	0.620102	0.373972	0.316699	0	0.547492	0.584363	0.452239	0	0.993526	0.749339	0	0.424084	0	0.322986	0.298068	0.26688	0	0.280616	0	0	0	0.188509	0	1.08017	0	0	0.344189	0	0	0	0.502331	0	0.537499	0.170753	0.276051	0
ENSG00000165672.6	PRDX3	0	0	0	0	0	0.513773	0.216125	0	0	0	0.286956	0	0	0	0	0	0	0	0.228832	0	0	0	0.662992	0	0	0	0	0	0	0.280616	0	0	0	0	0	0	0.292743	0.550325	0.344189	0	0	0	0	0	0.269605	0.189599	0.276051	0
ENSG00000065675.14	PRKCQ	0	0	0	0	0	0	0	0	0	0	0.251606	0	0	0	0	0	0	0	0	0	0	0	0	0	0	0	0	0	0	0	0	0	0	0.523879	0	0	0	0	0	0	0	0	0	0	0	0	0	0
ENSG00000185532.16	PRKG1	0.541577	0	0	0	0	0	0	0	0	0	0	0	0	0	0	0	0	1.00638	0.228832	0	0	0	0.276394	0	0	0	0	0.176584	0	0	0	0	0	0	0.239396	0	0	0	0	0	0.28164	0	0	0	0	0	0	0
ENSG00000148426.12	PROSER2	1.7872	1.97731	2.8511	0	0.625364	3.61771	5.07762	1.56668	3.56197	0.581	0	5.2353	0.571154	1.45799	1.11657	1.57286	5.19865	0.620888	1.84341	0.228857	4.93267	6.82073	0.662992	1.09023	0	0.937678	0.894205	5.82092	3.32879	4.54297	1.93403	2.25208	1.91547	0.974327	2.35685	3.01439	0	0.676028	23.2106	0	0.28164	2.31562	0.285371	2.7891	0.808815	5.04212	3.68128	0.914989
ENSG00000165630.13	PRPF18	0	0	0	0	0	0	0	0	0	0	0	0.481881	0.285577	0.186709	0	0	0	0	0	0	0	0.170444	0.310838	0	0	0	0	0	0.297656	0.229511	0	0	0	0	0	0	0	0.351782	0	0	0.290425	0.192316	0	0	0	0	0	0
ENSG00000099256.18	PRTFDC1	0	0	0.494341	0	0	0.435243	0.216125	0	0	0	0.860867	0.722821	0	0.186709	0	0	0	0	0.907191	0	0.234719	0	0	0.292128	0	0.432484	0.893175	0	1.40893	0.250246	0	0	0.269653	0.188509	0	0	0	1.37826	0.688377	0	0	0	0.9364	1.59878	0.412543	0	1.42657	0
ENSG00000197746.13	PSAP	0	0	0	0	0	0	0	0	0	0.581	0	0	0	0	0	0.291251	0	0	0	0	0	0	0	0	0	0	0	0	0	0.250246	0	0	0	0	0	0.227166	0	0	0	0	0	0	0	0	0.269605	0	0.276051	0
ENSG00000059915.16	PSD	0	0	0	0	0	0	0	0	0	0	0	0	0	0	0	0	0	0	0	0	0	0	0	0	0	0	0	0	0	0	0	0	0	0	0	0	0	0	0	0	0	0	0	0.384392	0	0	0	0
ENSG00000179988.14	PSTK	0	0	0	0	0.224177	0	0	0	0	0	0	0	0	0	0	0	0	0	0	0	0	0	0	0	0	0	0	0	0	0	0	0	0	0	0	0	0	0	0	0	0	0	0	0	0	0	0	0
ENSG00000171862.10	PTEN	0	0	0	0	0	1.64115	0	0	0	0	0	0	0	0	0.558285	0	0.881688	1.13621	0.291262	0.252769	0.704157	0	0	0.399049	0	0.432484	0.893175	0	0	0.841849	0	0	0.682569	1.02128	0	0.227166	0	1.5204	0.344189	0	0.290425	1.09429	0	0.384392	1.6125	0	0.329864	0.292993
ENSG00000165983.14	PTER	0.241694	0.306634	0	0.673104	2.10502	0.652864	2.16125	0.22942	0	0	0	0.637895	0	0.933544	0	0.605658	0	0	0	1.21602	0	0	0	0	0	0	0	0.655199	1.40893	0	0.279556	0.72849	0.269653	0.790874	0.239396	0	1.36242	0.338014	1.39214	0	0	0.940985	0	0.384392	1.6125	1.61216	0	0
ENSG00000204179.10	PTPN20	0.241694	0.306634	0	0	0	0	0	0.22942	0	0	0.286956	0	1.94346	0	1.35984	0	0	0	0	0	0	0	0.310838	0	0	0	0.298068	0	0	0	0.279556	0	0	1.54491	1.2457	0.4432	0.852904	0	0.359576	0	0	0	0	0.384392	0	0.379199	0.276051	0
ENSG00000278561.1	PTPN20C	0	0	0	0	0	0	0	0	0	0	0	0	1.88311	0	0	0	0.273746	0	0	0	0	0	0	0	0	0	0	0	0.595312	0	0.279556	0	0	0.340425	0	0.227166	0.267418	0.16834	0	0	0	0.192316	0	0	0	0	0	0
ENSG00000132334.16	PTPRE	0	0	0	0	0.401187	0	0	0	0	0	0.251606	0.481881	0	0.374527	0.483172	0	0.547492	0	0	0	0	0	0	0	0	0	0	0.533761	0	0.280616	0	0	0	0	0	0	0	0	0	1.77895	0	0	0	0	0	0	0	0.34481
ENSG00000171813.13	PWWP2B	0	0	0	0	0	0	0	0	0	0	0	0	0	0.186709	0	0	0	0	0	0	0	0	0	0	0	0	0	0	0	0	0.279556	0	0	0	0	0	0	0	0	0	0	0.806902	0.285371	0	0	0	0	0
ENSG00000119943.12	PYROXD2	0	0	0	0	0.448354	0	0	0	0.281873	0	0	0	0	0.186709	0.316699	0	0.273746	1.49743	0.228832	0	0.262044	0	0	0	0	0	0	0	0	0	0	0	0	0	0	0	0	0	0.567498	0	0	0	0	0	0	0.189599	0	0
ENSG00000166024.13	R3HCC1L	2.1593	0.750769	0	0	1.69693	2.59016	0.904335	0	0.876596	2.4689	0.251606	0.637895	0.691854	4.88168	3.68433	1.51415	3.76947	2.08179	7.36359	0.733766	1.72501	1.43876	1.89256	0.584256	2.66162	0.791825	1.68808	0.3276	2.97656	2.35732	0.559112	0.298654	0	6.36358	0.54022	3.15354	0	0.366884	1.73633	0.728946	0.871274	2.0935	0	1.40163	0.808815	0	2.86063	0.621996
ENSG00000107560.10	RAB11FIP2	0.241694	0	0.820996	0	0	0	0	0	0	0	0.251606	0.318948	0	0	2.23314	0	0	0	0.228832	0	0.234719	0.493394	0	0.399049	0	0	0	0	0	0	0	0	0	0	0	0.787255	1.38774	0.33668	0.567498	0.728946	0	0	0	0	0.53921	0	0	0.621996
ENSG00000099246.16	RAB18	0	0.687692	1.30662	1.20929	1.42559	3.84162	0	0.276959	0.815984	0.547384	0.538562	0.722821	0.571154	0.915148	0.316699	1.84096	0.70762	0.422015	0.228832	0.504909	1.22061	2.14563	0.310838	0	0	0.432484	0.993664	0.3276	1.29978	1.54148	0	0	0.677776	1.50832	0.257402	0.571221	1.9479	1.02781	1.06334	0	0.886738	0.192316	0.9364	0.897968	1.61078	1.04337	0	0.982613
ENSG00000198915.11	RASGEF1A	0	0	0	0	0	0	0	0	0	0	0	0	0	0	0	0	0	0	0	0	0	0.340888	0	0	0	0	0	0	0	0	0	0	0	0	0	0	0.447303	0	0	0	0	0	0	0	0	0	0	0
ENSG00000107551.20	RASSF4	0	0	0	0	0	0	0	0	0	0	0	0	0	0	0	0	0	0	0	0	0	0	0	0	0	0	0	0	0	0	0	0	0	0	0	0	0	0	0	0	0	0	0	0	0	0	0	0
ENSG00000134453.15	RBM17	0	0	0	0	0.224177	0	0	0	0	0	0.251606	0	0.285577	0.373972	0.633398	0.291251	0	0	1.10262	0	0	0.374669	0.331496	0.399049	1.38541	0.432484	0	0	0.352232	0.530862	0	0.298654	0	0	0	0	0.292743	0	0.344189	0.364473	0.733794	0	0	1.15318	0.269605	0	0.276051	0
ENSG00000203867.7	RBM20	0	0	0	0	0	1.25146	0.320729	0	0	0	0	0	0.285577	0.730103	0	0	0	0	0.228832	0	0	0	0	0	0	0	0	0.26688	0.297656	0.250246	0	0.682772	0	0	0	0.227166	0	0	0	0	0	0	0	0	0	0	0	0
ENSG00000165476.13	REEP3	0	0	0.494341	0	0.849541	0	0	0	0.801166	0	0.503213	0.956843	0.620102	0.56179	1.50838	0	0.70762	0.584363	1.78098	0.481627	0	0.246697	0.310838	0.716212	0	0	1.29173	0.831783	0.595312	0.730003	0	0	0.451851	0	0.27011	0.908664	1.12032	1.01404	0.567498	1.51835	0	0.537934	0	4.64625	0.267894	2.02985	0.552102	0
ENSG00000165731.18	RET	0	0	0	0	0	0.731394	0	0	0	0	0	0	0	0	0	0	0	0	0	0	0	0	0	0	0	0	0	0	0	0	0	0	0	0	0	0	0	0	0	0	0	0	0	0	0	0	0	0
ENSG00000148908.14	RGS10	0.791331	0	0.494341	0.673104	0	0.217621	0.432249	0	0	2.18953	0	1.88434	0	1.10352	0.483172	0	0	0.292181	0	0.710484	0.758807	0.246697	0	0	0	0.791825	1.18918	1.50698	1.35435	0.500492	0	0.298654	0.808958	1.02128	0	0.355187	0	0.338014	3.38256	0.364473	0	0.278177	0	5.6734	1.3446	1.28429	5.62959	0.948801
ENSG00000072422.16	RHOBTB1	0	0.343846	0	0	0	0	0	0	0	0	0	0	0	0	0	0	0.263939	0	0	0	0	0	0	0	0	0	0	0	0	0	0	0	0	0	0	0.432068	0	0	0	0	0	0	0	0	0	0	0	0
ENSG00000184719.11	RNLS	0	0	0	0	0	0	0	0	0	0	0	0	0	0	0	0	0.263939	0	0	0	0	0	0	0	0	0	0	0	0	0	0	0	0	0	0	0	0	0	0	0	0	0	0	0	0	0	0	0
ENSG00000225383.7	RP1-186E20.2	0.270788	0	0	0	0	0	0	0	0	0	0	0	0	0	0	0	0	0	0	0	0	0	0	0	0	0	0	0	0	0	0	0	0	0	0	0	0	0	0	0	0	0	0	0	0	0	0	0
ENSG00000254536.1	RP11-108K14.8	1.50835	0	0	0	0.401187	1.50205	0.320729	0.276959	0.801166	0	1.47757	1.60166	0	1.27294	0.316699	1.27003	0.547492	1.62727	2.58962	0	0.262044	0.187335	0	1.5926	0	0	0.298068	0.26688	0	0	1.64305	0.804525	1.48673	4.44141	0	0.227166	0	0.844368	1.42292	0	0.853705	1.27739	0.502331	1.41154	2.70547	0	0.567539	1.18998
ENSG00000264204.2	RP11-109G10.1	0	0	0	0	0	0	0	0	0	0	0.251606	0	0	0	0	0	0	0	0	0	0	0	0	0	0	0	0	0	0	0	0	0	0	0	0	0	0	0	0	0	0	0	0	0	0	0	0	0
ENSG00000258539.1	RP11-12J10.3	9.49862	9.29595	6.12613	1.34621	5.36429	5.47526	5.78277	2.25571	7.31422	1.2103	4.60617	4.03751	2.21763	11.6104	7.97125	4.85767	12.7955	9.82439	22.4071	3.96879	18.532	1.45565	8.7318	4.51429	3.61025	0.901323	9.42786	3.25683	34.7368	9.30142	4.6953	1.70992	10.4336	8.77255	3.13647	5.25579	5.35057	2.75918	10.2633	10.1789	11.8681	7.04194	5.27485	11.9362	5.41951	10.6435	3.6893	11.4555
ENSG00000254929.6	RP11-144G6.12	0.263777	0.713557	0.732677	0	0.535785	1.11987	0.472086	1.1056	0	0.547384	0	1.43727	1.58613	0	0.558285	0	0.263939	0.422015	0.228832	0.481627	0.262044	0	0	0	2.55243	2.01614	0.298068	0.886929	0.297656	0	0	0	2.46686	0.717444	0.257402	0.216034	0.714721	0.351782	1.06334	0	0	0.82532	1.03894	1.4696	0.53921	0.72752	0.881966	0
ENSG00000228566.1	RP11-170M17.1	0	0	0	0	0	2.70045	0	0	0	0	0	0	0	0	0	0	0	0	0	0	0	0	0	0	0	0	0	0	0	0	0	0	0	0	0	0	0.267418	0	0	0	0	0	0	0	0	0	0	0
ENSG00000235687.9	RP11-20F24.3	0	0.613268	0	0	0	0	0	0	0	0	0	0	0	0	0	0	0	0	0	0	0	0	0	0	0	0	0	0	0	0	0	0	0	0	0	0	0	0	0	0	0	0	0	0	0	0	0	0
ENSG00000229981.7	RP11-215N21.1	0	0	0	0	0	0	0	0	0	0	0	0	0	0	0	0	0	0	0	0	0	0	0	0	0	0	0	0	0	0	0	0	0	0	0	0	0	0	0	0	0	0	0	0	0	0	0	0
ENSG00000228065.10	RP11-222A11.1	1.2968	0	0	1.20929	0	4.14527	0	0	0	0	0	0	0	0	0	1.32875	0	0.422015	0.808643	0.252769	1.25557	0	0	1.91336	0	0	0.298068	0	2.41105	0.229511	1.09536	1.70992	2.12078	0	0	0.216034	0	1.98766	1.07873	0	0	0	0	0	0	0.531106	0.621351	0
ENSG00000229261.1	RP11-227H15.4	0	0	0	0	0	0	0	0	0	0	0	0	0	0	0	0	0	0	0	0	0	0	0	0	0	0	0	0	0	0	0	0	0	0	0	0	0	0	0	0	0	0	0	0	0	0	0	0
ENSG00000238276.5	RP11-245J24.1	0	0	0	0	0	0	0	0	0	0	0	0	0	0	0	0	0	0	0.228832	0	0	0	0	0	0	0	0	0	0	0	0	0	0	0	0	0	0	0	0	0	0	0	0	0	0	0	0	0
ENSG00000237470.3	RP11-271M1.2	0	0	0	0	0	0	0	0	0	0	0	0	0	0	0	0	0.273746	0	0	0	0	0	0	0	0	0	0	0	0	0	0	0	0	0	0	0	0	0	0	0	0	0	0	0	0	0	0	0
ENSG00000230131.5	RP11-282I1.1	0	0	0	0	0	0	0	0	0	0	0	0	0	0	0	0	0	0	0	0	0	0	0	0	0	0	0	0	0	0	0	0	0	0	0	0	0	0	0	0	0	0	0	0	0	0	0	0
ENSG00000276805.2	RP11-291L22.9	0	0	0	0	0	0	0	0	0	0	0	0	0	0	0.633398	0	0	0	0.291262	0	0	0.340888	0	0.424084	0	0	0	0	0	0	0	0	0	0	0	0.227166	0	0	0	0	0	0	0	0	0	0	0	0
ENSG00000239665.8	RP11-295P9.3	0	0	0	0	0	0	0	0	0	0	0	0	0	0	0	0	0	0	0	0	0	0	0	0	0	0	0	0.176584	0	0	0	0	0	0	0	0	0	0	0	0	0	0	0	0	0	0	0	0
ENSG00000237399.7	RP11-298E9.3	0	0	0	0	0	0	0	0	0	0	0	0	0	0	0	0	0	0	0	0	0	0	0	0	0	0	0	0	0.595312	0	0	0	0	0	0	0	0	0	0	0	0	0	0	0	0	0	0	0
ENSG00000231829.2	RP11-310E22.5	0	0	0	0	0	0	0	0	0	0	0	0	0	0	0	0	0	0	0.678359	0	0	0	0	0	0	0	0	0	0	0	0	0	0.225925	0	0	0	0	0	0	0	0	0	0	0	0	0	0	0
ENSG00000227492.1	RP11-316M21.6	0	0	0	0	0	0	0	0	0	0	0	0	0	0	0	0	0	0	0	0	0	0	0	0	0	0	0	0	0	0	0	0	0	0.188509	0	0	0	0	0	0	0	0	0	0	0	0	0	0
ENSG00000223482.7	RP11-322M19.1	0	0.613268	0	0	0	0	0	0	0	0	0	0	0	0	0	0	0	0	0	0	0	0	0	0	0	0	0	0	0	0	0	0	0	0	0	0	0	0	0.344189	0	0	0	0	0	0	0	0	0
ENSG00000237840.6	RP11-358L16.4	0.505471	0	0	0	0	0.217621	0	0	0	0	0.286956	0	0	0	0	0	0	0	0	0	0	0.187335	0.310838	0	0	0	0	0	0	0	0	0	0	0	0	0.648101	0	0	0	0	0	0.268967	0	0	0	0.170753	0	0.34481
ENSG00000151631.8	RP11-397P14.3	0	0	0	0	0	0	0	0	0	0	0	0	0	0	0	0	0	0	0	0	0	0	0	0	0	0	0	0	0	0.500492	0	0	0	0	0	0	0	0	0	0	0	0	0	0	0	0	0	0
ENSG00000276490.1	RP11-400G3.5	0	0	0	0	3.21686	0	0	0	0	0	0	0	0	0	0.316699	0	0	0	0	0	0	0	0	0	0.583509	0	0.297039	0	0	0	0	0.429836	0	0.188509	0	0.710375	0	1.01137	0.359576	0	0	0	0	0	0	0.52509	0.329864	0
ENSG00000255339.6	RP11-411B6.6	0	0	0	0	0	0	0	0	0	0	0	0	0	0	0	0	0	0	0	0	0	0	0	0	0	0	0	0	0	0	0	0	0	0	0	0	0.267418	0	0	0	0.443369	0	0	0	0	0	0	0
ENSG00000204832.9	RP11-414K1.3	0	0	0	0	0	0	0	0	0	0	0	0	0	0	0	0	0	0	0	0	0	0	0	0	0	0	0.297039	0	0	0	0	0	0	0	0	0	0	0	0	0	0	0	0	0	0	0	0	0
ENSG00000226688.6	RP11-429G19.2	0	0	0	0	0	0	0	0	0	0	0	0	0	0	0	0	0	0	0	0	0	0	0	0	0	0	0	0	0	0	0	0	0	0	0	0	0	0	0	0	0	0	0	0	0	0	0	0
ENSG00000242288.9	RP11-464F9.1	0.270788	0.306634	0.494341	0.604644	0.311608	0	0.320729	0	0	1.09477	0.538562	0.318948	0.285577	0.373418	0	0.605658	0.273746	0	0.22612	0.252769	0.234719	0.246697	0	0.399049	0	0.645973	0.594077	0	0.352232	0	0	0.597308	0	0	0	0.4432	0	0.520122	0	0	0	0.461283	0	0	0	0.379199	1.11964	0
ENSG00000237489.4	RP11-500G10.1	0	0	0	0	0	0	0	0	0	0	0	0	0	0	0	0	0	0	0	0	0	0	0	0	0	0	0	0	0	0	0	0	0	0	0	0	0	0.183442	0	0	0	0	0	0	0	0	0	0
ENSG00000283930.1	RP11-508N22.2	0	0	0	0	0	0	0	0	0	0	0	0	0	0	0	0	0	0	0	0	0	0	0	0	0	0	0.594077	0	0	0	0	0	0	0	0	0	0	0	0	0	0	0	0	0	0	0	0	0
ENSG00000249967.1	RP11-548K23.11	0	0	0.406021	1.20929	0.623215	0.256886	0	0.276959	0.53411	0	0	0	0	0.355022	0.633398	0.955627	0.791817	0.292181	0	0	0.479282	0	0.884285	0	0	0	0.993664	0	0	1.34234	0.547682	0	0.451851	0.377018	0	0.227166	0.447303	0.704898	2.19834	0.364473	0.28164	0	0.285371	1.37756	0	0.189599	0.291488	0.310998
ENSG00000255624.3	RP11-564D11.3	0.241694	0	0	0	0.311608	0	0	0	0.815984	0	0	0.481881	0	0	0	0	0	1.0429	0.228832	0	0	0.170444	0.310838	0.584256	1.27621	0	0	0	0	0	0	0.935708	0	0.450448	0	0.355187	0	0.535223	0	2.79119	0	0	0	0	0	0	0	0
ENSG00000271816.1	RP11-574K11.28	0.541577	0	0	0	0.759961	0.388474	0	0	0	0.547384	0.400444	0.956843	0.620102	0.186709	0	0.291251	0	0.292181	0.228832	0	0.479282	0.246697	0	0.292128	0	0.432484	0.297039	0	0	0.510128	0	0.298654	0	0	0	0.4432	0	0.183442	0	0	0.290425	0.576948	0	0	0.267894	0.189599	0.621351	0
ENSG00000272916.5	RP11-574K11.31	0	0	0	0	0	0	0	0	0	0	0	0	0	0	0.241586	0	0	0.422015	0.457664	0	0	0	0	0	0	0	0	0	0	0	0	0	0	0	0	0	0	0	0	0	0	0	0	0	0	0	0	0
ENSG00000237943.6	RP11-5N23.2	0	0	0	0	0	0	0	0	0	0	0	0	0	0	0	0	0	0	0	0	0	0	0	0.399049	0	0	0	0	0	0	0	0	0	0	0	0	0	0	0	0	0	0	0	0	0	0	0	0
ENSG00000238021.6	RP11-748L13.1	0	0	0	0	0	0	0	0	0.281873	0	0	0	0	0	0	0	0	0.292181	0	0.758308	0	0	0	0	0	0	0	0	0	0	0	0	0	0	0	0	0	0	0	0	0	0	0	0	0	0	0	0
ENSG00000225484.6	RP11-773D16.1	0.241694	0	0	0	0	0	0.255961	0	0.267055	0	0	0.438693	1.2402	0.374527	0	0	0	0	0	0	0	0.170444	0.662992	0	0	0	0	0.26688	0	0	0	0	0	0	0	0	0.267418	0	0	0	0	0	0.570742	0	0	0.379199	0.552102	0
ENSG00000238266.1	RP11-799O21.1	0	0.343846	2.93071	0	0	0	0	0	0	0	0	0	0	0	0.241586	0	0	0.913069	0.22612	0	0	0	0	0	0	0	0	0	1.59743	0	0	1.11261	0.677776	0	0	0	2.3747	0.33668	0	0	0	0	0	0	0	0	0	0
ENSG00000271880.1	RP11-96C23.5	0	0	0	0	0	0	0	0	0	0	0	0	0	0	0	0	0	0	0	0	0	0.340888	0	0	0	0	0	0	0	0	0	0	0	0	0	0	0	0	1.135	0	0	0	0	0	0	0	0	0
ENSG00000283709.1	RP13-27G4.2	0	0	0	0	0	0	0	0	0	0	0	0	0	0	0	0	0	0	0	0	0	0	0	0	0	0	0	0	0	0	0	0	0	0	0	0	0	0	0	0	0	0	0	0	0	0	0	0
ENSG00000148688.13	RPP30	0	0	0	0	0	0	0.320729	0	0	0	0	0	0.345927	0	0	0	0	0	0	0	0	0	0	0	0	0	0.298068	0	0	0.280616	0	0.505871	0.225925	0.261939	0	0	0.267418	0	0	0	0	0.278177	0	0	0	0.170753	0	0.621996
ENSG00000152464.14	RPP38	0	0	0	0	0	0	0	0	0	0	0	0	0	0	0	0.291251	0	0	0	0	0.479282	0	0	0	0	0	0	0	0.704464	0	0	0	0	0.188509	0	0	0	0	0	0	0	0	0	0	0	0	0	0
ENSG00000138326.19	RPS24	0	0	0	0	1.25073	0	0	0	0	0	0	0	0.620102	0.336626	1.60142	0	0	2.54033	0.457664	0.734396	0	0	0	0	0	0	0.298068	0	0	0	0	0	0	0	0.27011	0	0	0.550325	0	0	0	1.71025	0.753571	1.05122	0	0.189599	0	0
ENSG00000052749.13	RRP12	1.03303	0	0	0	0	1.25146	0	0.553919	0	0	1.00643	0.318948	0	0.896753	0	0.332188	0.263939	0	0.811356	0	0.704157	0.852221	0	0.399049	0	0	1.18918	0	2.12579	2.20928	0.827238	0.429836	0.495578	0.680851	0.54022	0.432068	1.18735	0.33668	0.688377	0	0.290425	0.922566	0	2.88114	1.87868	1.82742	0	0.292993
ENSG00000148484.17	RSU1	2.84827	1.43846	0.406021	0.604644	4.41182	0.652864	0.432249	0.414318	0	3.45238	0.825518	1.51673	0	2.56206	0	0.302829	0.70762	0	0.228832	0.804872	1.26541	0	0.939387	0.876384	0	0.322986	1.98717	1.68914	3.11551	0.510128	0.279556	0	1.02385	0	1.5084	0.355187	1.80972	0.366884	1.07873	0	0.56328	0.278177	0	2.91828	4.31455	3.22071	0.276051	0
ENSG00000182010.10	RTKN2	0	0	0	0	1.7372	0	0.216125	0	0	0	0.251606	0	0	0.336626	0	0	0	0.620888	1.487	0	0	0.434032	0	0	0	0	0	0	0	0	0	0	0	0.377018	0.239396	0.710375	0.292743	0	0	0	0	0.192316	0	0.513576	0	0.341506	0	0
ENSG00000204130.13	RUFY2	3.54531	1.53317	2.35676	2.41857	3.56658	4.36918	0.944171	0.506379	0.53411	2.83777	1.07712	0.878836	2.18009	1.45965	0.559125	2.8491	3.44256	3.96873	2.10564	1.1682	4.33645	1.10712	1.80301	1.53934	1.75053	2.30277	3.77059	2.10703	3.7778	2.29076	0	1.41126	4.63511	3.23163	1.269	2.47204	0.534836	2.72764	1.76711	1.59954	0.580849	1.41148	1.4046	2.13642	1.21622	5.58686	2.83821	3.82901
ENSG00000156671.12	SAMD8	1.75811	2.40692	0.406021	0	0.623215	2.28529	0	0.276959	0.815984	0.547384	2.05892	1.31608	0.345927	1.5884	0.558285	1.56128	2.12286	0	0.686496	2.63699	1.31022	0.170444	0	0.399049	0.692705	0.937678	2.58022	0.3276	1.19062	0.500492	0	0.597308	1.03488	0.638958	0.748903	0.432068	3.05667	1.5466	2.28844	0.364473	0.572065	0	1.07307	0.384392	2.69092	2.01702	0.276051	2.55341
ENSG00000079332.14	SAR1A	0	0.306634	0	0	0	0.217621	0	0	0.267055	0	0	0.24094	0.285577	0.186709	1.35984	0	0	0	0	0	0	0	0	0	0	0	0	0	0.595312	0	0.547682	0	0	0	0	0	0.267418	0	0	0.364473	0.443369	0.278177	0	0.350407	0.412543	0	0	0
ENSG00000214279.13	SCART1	0.263777	0	0	0	0	0	0	0	0	0	0	0	0	0	0	0	0	0	0	0	0	0	0	0	0	0	0	0	0	0	0.279556	0	0.269653	0.188509	0	0	0	0	0	0	0	0	0	0	0	0	0	0
ENSG00000099194.5	SCD	1.86747	0.343846	0	0	0	1.9373	0	0	0	0	0.251606	0.637895	1.58613	0	0.316699	0	0	0	0	0	0	0	0	0	0	0.468839	0	0.706337	0	0	0.547682	0.682772	0	0.785818	0	0.355187	0	0	0.719152	0	1.12656	0	0	0.350407	0	0.549952	0	0
ENSG00000107651.12	SEC23IP	2.32878	2.17788	0.900362	0	1.20832	0.902247	0.472086	2.58021	1.36491	0.547384	0.903657	0.920574	2.36114	3.59145	3.27544	2.89004	0.617749	1.16873	2.24135	0.276051	0.758807	0.681777	2.1483	0.424084	0.583509	0	2.97553	1.03794	2.80916	1.03135	0	0.505871	1.41989	3.03806	0.257402	2.22713	1.32553	1.56036	0.344189	0	1.98905	0.961579	0.570742	1.21439	1.61078	2.73251	0	1.32742
ENSG00000176986.15	SEC24C	0	0.343846	0	0	0	0.513773	0	0.830878	0.53411	0	0	0.318948	0.620102	0.374527	0	0	0.263939	0	0	0	0.234719	0.187335	0.310838	0	0.583509	0	0	0	0	0	0	0	0	0.94279	0.257402	0	0	0	0.567498	0	0	0	0.502331	0	0	0.183584	0.859026	0
ENSG00000075826.16	SEC31B	0	0	0	0	0	0.217621	0	0	0	0	0	0	0	0	0	1.28781	0	0	0	0	0	0	0	0.292128	0	0	0	0.3276	0	0	0	0	0	0	0.957586	0.216034	0	0	0	0	0	0	0	0	0	0	0	0
ENSG00000065665.20	SEC61A2	0	0	0.406021	0	0	0	0	0	0	0	0.251606	0	0.691854	0	0.316699	0.291251	0.35381	0	0	0	0	0.170444	0	0	1.27621	0	0	0	0	0.561233	0	0	0	0	0	0	0.292743	0.366884	0.567498	0.364473	0	0	0	0	0.269605	0.189599	0	0
ENSG00000095539.15	SEMA4G	0	0.406923	0	0	0	0	0	0	0	0	0	0.24094	0	0	0	0.332188	0	0	0.22612	0	0	0.357779	0	0	0	0	0.596137	0	0	0	0	0.551589	0	0	0	0.648101	0	0.33668	0	0	0	0	0	0	0	0	0	0.34481
ENSG00000086475.14	SEPHS1	0	0	0	0	0.311608	1.0806	0	0	0.281873	0	1.08784	0.438693	0	0.748499	0.316699	0	3.21217	0	0.454952	0	0	1.47254	0	0	0	0	0	0.533761	0.595312	0	0	0.298654	0.495578	0.638958	0.239396	1.55677	0.267418	0.550325	0.344189	0	0.28164	0	0	0.350407	2.83385	0.537921	0.989591	0
ENSG00000120555.13	SEPT7L	0	0	0	0	0	0	0	0	0	0	0	0	0.285577	0	0	0	0	0	0	0	0	0	0	0	0	0	0	0	0	0	0	0	0	0	0	0	0	0	0	0	0	0	0	0	0	0.189599	0	0
ENSG00000198879.11	SFMBT2	3.67571	66.1609	16.7899	1.20929	0.224177	0.388474	0.641459	0.691278	0	1.8396	5.64051	0.318948	161.58	1.90663	44.8904	38.1979	3.38211	90.2817	71.1669	2.11528	2.91065	54.4472	0	0	1.96892	0	18.2666	1.9656	1.2452	5.24114	34.2935	5.03831	0.341285	51.1034	0	0.216034	2.66262	19.4568	0.344189	3.56355	26.9861	59.5768	3.80198	0	16.0822	0.549952	0	6.48835
[truncated: 10,586 more rows]
[truncated: 12 more columns]
