# Supplementary material for: The Circular RNA Landscape of Non-Small Cell Lung Cancer Cells
Source: Cancers (Basel). 2020 Apr 28;12(5):1091. doi: 10.3390/cancers12051091 (PMC7281449; doi:10.3390/cancers12051091)
Supplement: Supplementary file 1 [file cancers-12-01091-s001.zip › Suppl Table S3 circRNA data backsplice level.xlsx]

## Sheet: Table S3
Table S3: circRNA read counts at backsplice level (normalized for library size, average of 2-3 biological replicate RNA-Seq)
circRNA ID	Gene ID	Gene Name	Chromosome	Start	End	Strand	Transcript ID	Exon Start	Exon End	A427	A549	BEAS-2B	Calu1	Calu3	Calu6	HCC2935	HCC4006	HCC827	IMR-90	NCI-H1299	NCI-H1373	NCI-H1395	NCI-H1435	NCI-H1437	NCI-H1563	NCI-H1568	NCI-H1573	NCI-H1623	NCI-H1648	NCI-H1650	NCI-H1651	NCI-H1666	NCI-H1693	NCI-H1703	NCI-H1734	NCI-H1755	NCI-H1781	NCI-H1792	NCI-H1793	NCI-H1838	NCI-H1944	NCI-H1975	NCI-H1993	NCI-H2009	NCI-H2023	NCI-H2030	NCI-H2073	NCI-H2085	NCI-H2087
chr1_94098794_94103142_-	ENSG00000198691.11	ABCA4	chr1	94098794	94103142	-	ENST00000370225.3	6	5	0	0	0	0	0	0	0	0	0	0	0	0	0	0	0	0	0	0	0	0	0	0	0	0	0	0	0	0	0	0	0	0	0	0	0	0	0	0	0.344189	0
chr1_93997861_93998110_-	ENSG00000198691.11	ABCA4	chr1	93997861	93998110	-	ENST00000370225.3	48	48	0	0	0	0	0	0	0	0	0	0	0	0	0	0	0	0	0	0	0.452239	0	0	0	0	0	0	0	0	0	0	0	0	0	0	0	0.27011	0	0	0	0	0
chr1_229547499_229549434_-	ENSG00000135776.4	ABCB10	chr1	229547499	229549434	-	ENST00000344517.4	3	2	0	0	0	0	0	0	0	0	0	0	0	0	0	0	0	0	0	0	0	0	0	0	0	0	0	0	0	0	0	0	0	0	0	0	0	0	0	0	0	0
chr1_229542237_229547701_-	ENSG00000135776.4	ABCB10	chr1	229542237	229547701	-	ENST00000344517.4	4	3	0.241694	0	0	0	0	0	0	0	0	0	0	0	0	0	0	0	0	0	0.582524	0	0	0	0	0	0	0	0	0	0	0	0	0	0	0	0	0	0	0	0	0
chr1_229539456_229549434_-	ENSG00000135776.4	ABCB10	chr1	229539456	229549434	-	ENST00000344517.4	6	2	0.541577	0	0	0	0.311608	0	0	0	0	0.581	0	0	0	0	0.316699	0	0	0.422015	0	0	0	0	0	0	0	0	0	0	0	0	0	0	0	0	0	0	0.267418	0.16834	0	0
chr1_229539456_229547701_-	ENSG00000135776.4	ABCB10	chr1	229539456	229547701	-	ENST00000344517.4	6	3	0	0	0	0	0	0	0	0	0	0	0	0	0.285577	0	0	0	0	0	0	0	0	0	0	0	0	0	0	0	0	0.250246	0	0	0	0	0	0	0	0.338014	0	0
chr1_229539456_229542371_-	ENSG00000135776.4	ABCB10	chr1	229539456	229542371	-	ENST00000344517.4	6	4	0.241694	0	0.326655	0	0	0	0	0	0	0	0	0	1.2402	0.187263	0.633398	0	0	0	0.22612	0	0.479282	0.170444	0	0	0	0	0	0.3276	0.297656	0	0	0	0	0	0	0.355187	0	0	0	0
chr1_229539456_229540752_-	ENSG00000135776.4	ABCB10	chr1	229539456	229540752	-	ENST00000344517.4	6	5	0	0	0	0	0	0	0	0	0	0	0	0	0	0	0	0	0	0	0	0.252769	0	0	0	0	0	0	0	0	0	0	0	0	0	0	0	0	0	0	0	0
chr1_229531636_229549434_-	ENSG00000135776.4	ABCB10	chr1	229531636	229549434	-	ENST00000344517.4	7	2	0	0	0	0	0	0	0	0	0	0	0	0	0	0	0	0	0	0	0	0	0	0	0	0	0	0	0	0	0	0	0	0	0	0	0	0	0.292743	0	0	0
chr1_229530199_229549434_-	ENSG00000135776.4	ABCB10	chr1	229530199	229549434	-	ENST00000344517.4	8	2	0	0	0	0	0	0	0	0	0	0	0	0	0	0	0	0	0	0	0.228832	0	0	0	0	0	0	0	0	0	0	0	0	0	0	0	0	0	0	0	0	0
chr1_229530199_229547701_-	ENSG00000135776.4	ABCB10	chr1	229530199	229547701	-	ENST00000344517.4	8	3	0	0	0	0	0	0.513773	0	0	0	0	0	0	0	0	0	0	0	0	0	0	0.262044	0	0	0	0	0	0	0	0	0	0	0	0	0	0	0	0	0	0	0
chr1_229530199_229542371_-	ENSG00000135776.4	ABCB10	chr1	229530199	229542371	-	ENST00000344517.4	8	4	0	0	0	0.673104	0	0	0	0	0	0	0	0	0	0	0.241586	0	0.263939	0	0	0	0	0	0	0	0	0	0	0	0	0	0	0	0	0.188509	0	0.710375	0	0	0	0
chr1_229530199_229531731_-	ENSG00000135776.4	ABCB10	chr1	229530199	229531731	-	ENST00000344517.4	8	7	0.263777	0	0	0	0	0	0	0	0	0	0	0	0	0.168313	0	0	0.273746	0	0	0	0	0	0.331496	0	0	0	0	0	0	0.500492	0	0.252936	0.269653	0	0	0.432068	0	0	0	0
chr1_229527229_229549434_-	ENSG00000135776.4	ABCB10	chr1	229527229	229549434	-	ENST00000344517.4	9	2	0	0	0	0	0	0	0	0	0	0	0	0	0.620102	0	0	0	0	0	0	0	0	0	0	0	0	0	0	0	0	0	0	0	0	0	0	0	0.267418	0	0	0
chr1_229527229_229531731_-	ENSG00000135776.4	ABCB10	chr1	229527229	229531731	-	ENST00000344517.4	9	7	0	0	0	0	0	0	0	0	0	0	0	0	0	0	0	0	0	0	0	0	0	0	0	0	0	0	0	0	0	0	0	0	0	0	0	0	0	0	0	0
chr1_229525936_229549434_-	ENSG00000135776.4	ABCB10	chr1	229525936	229549434	-	ENST00000344517.4	10	2	0	0	0	0	0	0	0	0	0	0	0	0	0	0	0	0	0	0.422015	0	0	0	0.170444	0	0	0	0	0	0	0	0	0	0	0	0	0	0	0	0.16834	0	0
chr1_229525936_229542371_-	ENSG00000135776.4	ABCB10	chr1	229525936	229542371	-	ENST00000344517.4	10	4	0	0	0	0	0	0	0	0	0	0	0	0	0	0.54284	0	0	0	0	0	0	0.262044	0.170444	0	0	0	0	0	0	0.352232	0	0	0	0	0	0.239396	0.216034	0	0	1.135	0
chr1_229525936_229531731_-	ENSG00000135776.4	ABCB10	chr1	229525936	229531731	-	ENST00000344517.4	10	7	0	0	0	0	0	0	0	0	0	0	0	0	0	0	0	0	0	0	0.22612	0	0	0	0	0	0	0	0	0	0	0	0	0	0	0	0	0	0	0.16834	0	0
chr1_229521592_229549434_-	ENSG00000135776.4	ABCB10	chr1	229521592	229549434	-	ENST00000344517.4	11	2	0	0	0	0	0	0	0	0	0	0	0	0	0	0	0	0	0.70762	0	0	0	0	0	0	0	0	0	0	0	0	0	0	0	0	0	0	0	0	0	0	0
chr1_229521592_229531731_-	ENSG00000135776.4	ABCB10	chr1	229521592	229531731	-	ENST00000344517.4	11	7	0	0	0	0	0	0	0	0	0	0	0	0	0	0	0	0	0	0	0	0	0	0	0	0	0	0	0	0	0	0	0	0	0	0	0	0	0	0	0	0
chr1_229518841_229549434_-	ENSG00000135776.4	ABCB10	chr1	229518841	229549434	-	ENST00000344517.4	12	2	0	0	0	0	0	0	0	0	0	0	0	0	0	0	0	0	0	0	0	0	0	0	0	0	0	0	0	0	0	0	0	0	0	0	0	0	0	0	0	0
chr1_94458607_94468007_+	ENSG00000117528.11	ABCD3	chr1	94458607	94468007	+	ENST00000370214.8	2	4	0	0	0	0	0	0	0	0	0	0	0	0	0	0	0	0	0	0	0.291262	0	0.479282	0	0	0	0	0	0	0	0	0	0	0.252936	0	0	0	0	0.585486	0	0	0
chr1_94458607_94473835_+	ENSG00000117528.11	ABCD3	chr1	94458607	94473835	+	ENST00000370214.8	2	5	0	0	0	0	0	0	0	0	0	0	0	0	0	0	0	0	0	0	0	0	0	0	0	0.424084	0	0	0	0	0	0	0	0	0	0	0	0	0	0	0	0
chr1_94458607_94475737_+	ENSG00000117528.11	ABCD3	chr1	94458607	94475737	+	ENST00000370214.8	2	7	0	0	0	0	0	0	0	0	1.06822	0	0	0	0	0	0	0	0	0.584363	0	0	0.469438	0	0	0	0	0	0	0	0.352232	0	0	0	0	0	0	0	0	0	0	0
chr1_94458607_94480606_+	ENSG00000117528.11	ABCD3	chr1	94458607	94480606	+	ENST00000370214.8	2	9	0	1.22654	0.979966	0	0	0	0.511922	0	3.51617	0	0	0	0.571154	0.186709	2.79563	2.28438	0	0	0	0.78159	0.704157	0.170444	0.331496	0.424084	0	0	0	1.24968	1.12367	0.250246	0	0	0	0	0	0.864135	0	0	1.83876	1.01224
chr1_94458607_94483239_+	ENSG00000117528.11	ABCD3	chr1	94458607	94483239	+	ENST00000370214.8	2	10	0	0	0	0	0	0	0	0	0	0	0	0	0	0	0	0	0	0.84403	0	0	0	0	0	0	0	0	0	0	0	0.750738	0	0	0	0	0	0.454332	0	0	0	0
chr1_94458607_94491247_+	ENSG00000117528.11	ABCD3	chr1	94458607	94491247	+	ENST00000370214.8	2	16	0	0	0	0	0	0	0	0	0	0	0	0	0	0	0	0	0	0	0	0	0	0	0	0	0	0	0	0	0	0	0	0	0	0	0	0.227166	0	0	0	0
chr1_94458607_94506642_+	ENSG00000117528.11	ABCD3	chr1	94458607	94506642	+	ENST00000370214.8	2	21	0	0	0	0	0	0	0	0	0	0	0	0	0	0	0	0	0	0	0	0	0	0	0	0	0	0	0	0	0.352232	0	0	0	0	0	0	0	0	0.16834	0	0
chr1_94464775_94468007_+	ENSG00000117528.11	ABCD3	chr1	94464775	94468007	+	ENST00000370214.8	3	4	0	0	0	0	0	0	0	0	0	0	0	0	0	0.374527	0	0	0	0	0	0	0	0	0	0.424084	0	0	0	0	0	0	0	0	0	0	0	0	0	0	0	0
chr1_94464775_94475737_+	ENSG00000117528.11	ABCD3	chr1	94464775	94475737	+	ENST00000370214.8	3	7	0	0	0.406021	0	0.311608	0	0	0	0	0	0	0	0	0	0	0	0	0	0	0	0	0	0	0	0	0	0	0	0	0	0	0	0	0	0	0	0	0	0	0
chr1_94464775_94480606_+	ENSG00000117528.11	ABCD3	chr1	94464775	94480606	+	ENST00000370214.8	3	9	0	0	0	0	0	0	0	0	0	0	0	0	0	0	0	0	0	0	0	0.228857	0	0	0	0	0	0	0.993664	0	0	0.500492	0	0	0	0.340425	0	0.355187	0	0	0	0
chr1_94464775_94483239_+	ENSG00000117528.11	ABCD3	chr1	94464775	94483239	+	ENST00000370214.8	3	10	0	0	0	0	0	0	0	0	0	0	0	0	0	0	0	0	0	0	0	0	0	0	0	0	0	0	0	0	0	0	0	0.429836	0	0	0	0	0	0	0	0
chr1_94464775_94499614_+	ENSG00000117528.11	ABCD3	chr1	94464775	94499614	+	ENST00000370214.8	3	20	0	0	0	0	0	0	0	0	0	0	0	0	0	0	0	0	0	0	0.22612	0	0	0	0	0	0	0	0	0	0.561837	0	0	0	0	0	0	0	0	0	0.344189	0
chr1_94467919_94475737_+	ENSG00000117528.11	ABCD3	chr1	94467919	94475737	+	ENST00000370214.8	4	7	0	0	0	0	0	0.256886	0	0	0	0	0	0	0	0	0	0	0	0	0	0	0	0	0	0	0	0	0	0	0.297656	0	0	0	0	0	0	0	0	0	0	0
chr1_94473766_94475240_+	ENSG00000117528.11	ABCD3	chr1	94473766	94475240	+	ENST00000370214.8	5	6	0	0	0	0	0	0	0	0	0	0	0	0	0	0	0	0	0	0	0	0	0	0	0	0	0	0	0	0	0	0	0	0.298654	0	0	0	0	0	0	0	0
chr1_94473766_94475737_+	ENSG00000117528.11	ABCD3	chr1	94473766	94475737	+	ENST00000370214.8	5	7	0	0	0	0	0.224177	0	0	0	0	0	0	0	0	0	0	0	0	0	0	0	0	0	0	0	0	0	0	0	0	0	0	0	0	0	0	0	0	0	0	0
chr1_94473766_94483239_+	ENSG00000117528.11	ABCD3	chr1	94473766	94483239	+	ENST00000370214.8	5	10	0	0	0	0	0	0	0	0	0	0	0	0	0	0	0	0	0	0	0	0	0	0	0	0	0	0	0	0	0	0	0	0	0.225925	0	0	0	0	0	0	0
chr1_94473766_94515202_+	ENSG00000117528.11	ABCD3	chr1	94473766	94515202	+	ENST00000370214.8	5	22	0	0	0	0	0	0	0	0	0	0	0	0	0	0	0	0	0	0	0	0	0	0	0	0	0	0	0	0	0	0	0	0	0	0	0	0	0	0	0	0
chr1_94478259_94491247_+	ENSG00000117528.11	ABCD3	chr1	94478259	94491247	+	ENST00000370214.8	8	16	0	0	0	0	0	0	0	0	0	0	0	0	0	0	0	0	0	0	0	0	0	0	0	0	0	0	0	0	0	0	0	0	0.225925	0	0	0	0	0	0	0
chr1_94480464_94491247_+	ENSG00000117528.11	ABCD3	chr1	94480464	94491247	+	ENST00000370214.8	9	16	0	0	0	0	0	0	0	0	0	0	0	0	0	0	0	0	0	0	0	0	0	0	0	0	0	0	0	0	0	0	0	0	0	0	0	0	0	0	0	0
chr1_94483170_94487983_+	ENSG00000117528.11	ABCD3	chr1	94483170	94487983	+	ENST00000370214.8	10	13	0	0	0	0	0	0	0	0	0	0	0	0	0	0	0	0	0	0	0	0	0	0	0	0	0	0	0	0	0.352232	0	0	0	0	0	0	0	0	0	0	0
chr1_94483170_94491247_+	ENSG00000117528.11	ABCD3	chr1	94483170	94491247	+	ENST00000370214.8	10	16	0	0	0	0	0	0	0	0	0	0	0	0	0	0	0	0	0	0	0	0	0	0	0	0	0	0	0	0	0	0	0	0	0	0	0	0	0	0	0	0
chr1_94487542_94491247_+	ENSG00000117528.11	ABCD3	chr1	94487542	94491247	+	ENST00000370214.8	11	16	0	0.306634	0	0	0	0.870486	0	0	1.12749	0.547384	0	0	0	1.79351	0.316699	0	1.61306	0.292181	0	0.552102	0.714001	0	0	0	0	0.432484	0	1.33597	0	0.561233	0.559112	0	0	0	0.514804	0.454332	0	0.67336	0	0.364473
chr1_94487542_94499614_+	ENSG00000117528.11	ABCD3	chr1	94487542	94499614	+	ENST00000370214.8	11	20	0	0	0	0	0	0	0	0	0	0	0	0	0	0	0	0.302829	0	0	0	0	0	0	0	0	0	0	0	0	0	0	0	0	0	0	0	0	0	0	0	0
chr1_94487542_94506642_+	ENSG00000117528.11	ABCD3	chr1	94487542	94506642	+	ENST00000370214.8	11	21	0	0	0	0	0	0	0	0	0	0	0	0	0	0	0.316699	0	0	0	0.457664	0	0	0.246697	0	0.424084	0	0	0	0	0	0	0	0	0	0	0.239396	0	0	0	0	0
chr1_94487694_94491247_+	ENSG00000117528.11	ABCD3	chr1	94487694	94491247	+	ENST00000370214.8	12	16	0	0	0	0	0	0	0	0	0	0	0	0	0	0	0	0	0	0	0	0	0	0	0	0	0	0	0.298068	0	0	0	0	0	0	0	0	0	0	0	0	0
chr1_94487892_94506642_+	ENSG00000117528.11	ABCD3	chr1	94487892	94506642	+	ENST00000370214.8	13	21	0	0	0	0	0	0	0	0	0	0	0	0	0	0	0	0	0	0	0	0	0	0	0	0	0	0	0	0	0	0	0	0	0	0	0	0	0	0	0	0
chr1_94489725_94499614_+	ENSG00000117528.11	ABCD3	chr1	94489725	94499614	+	ENST00000370214.8	14	20	0	0	0	0	0	0	0	0	0	0	0	0	0	0	0	0	0	0	0	0	0	0	0	0	0	0	0	0	0	0	0	0	0	0	0	0	0	0	0	0
chr1_94489725_94506642_+	ENSG00000117528.11	ABCD3	chr1	94489725	94506642	+	ENST00000370214.8	14	21	0	0	0.494341	0	0	0	0	0	0	0	0	0	0	0	0	0	0	0	0	0	0.786132	0	0	0	0	0	0	0	0	0	0	0	0	0.261939	0	0	0	0	0.359576	0
chr1_94491184_94506642_+	ENSG00000117528.11	ABCD3	chr1	94491184	94506642	+	ENST00000370214.8	16	21	0	0	0	0	0	0	0	0	0	0	0	0	0	0	0	0	0	0	0	0	0	0	0	0	0	0	0	0	0	0.280616	0	0	0	0	0	0	0	0	0	0
chr1_94498602_94499614_+	ENSG00000117528.11	ABCD3	chr1	94498602	94499614	+	ENST00000370214.8	17	20	0	0.343846	0	0	0.934823	0	0	0.45884	0.281873	0	0	0	0	0	0	0.332188	0.547492	0	0.457664	0	0	0.170444	0	0.292128	0	0	0	0.176584	0.297656	0	0	0	0	0.188509	0	0	0	0	1.03257	0
chr1_94498602_94506642_+	ENSG00000117528.11	ABCD3	chr1	94498602	94506642	+	ENST00000370214.8	17	21	0	0.343846	0	0	0	0.902247	0.320729	0.276959	0.267055	0	0	0.877386	0	0	0	0	0	0	0.904479	0	0.496763	0	0	0	0	0	0	0	0	0	0	0.252936	0	0	0.27011	0	0.894606	0	0	0
chr1_179131311_179133374_-	ENSG00000143322.19	ABL2	chr1	179131311	179133374	-	ENST00000344730.7	3	2	3.1492	5.86884	3.10735	3.83324	7.09673	5.69288	3.42722	1.79912	4.65982	0	0.286956	4.32164	7.11142	4.80421	2.7009	4.69006	4.47296	6.78098	1.03476	1.49144	4.76329	3.03927	7.22495	5.17365	1.16702	2.15691	5.75452	3.29042	8.61227	2.90456	1.39778	2.41357	1.9592	4.84515	2.54542	2.92637	8.35398	2.32434	9.80654	0
chr1_179131311_179131481_-	ENSG00000143322.19	ABL2	chr1	179131311	179131481	-	ENST00000344730.7	3	3	0	0.613268	0	0	0.448354	0.256886	0	0	0	0	0	0.24094	0.620102	0	0	0	0.70762	0	0	0.228857	0	0.246697	0	0	0	0	0.596137	0.26688	1.91619	0	0	0	0	0.602365	0	0	0.802255	0.183442	0	0
chr1_179126377_179133374_-	ENSG00000143322.19	ABL2	chr1	179126377	179133374	-	ENST00000344730.7	4	2	0	0	0	0	0	0	0	0.276959	0	0	0	0	0	0	0	0	0.263939	0	0	0	0	0.170444	0	0	0	0	0	0	0	0.918045	0	0	0	0	0	0	0	0	0	0
chr1_179126377_179131481_-	ENSG00000143322.19	ABL2	chr1	179126377	179131481	-	ENST00000344730.7	4	3	0	0	0	0	0	0.256886	0	0	0	0	0	0	0	0	0	0	0	0	0	0	0	0	0	0.798098	0	0	0	0	0	0	0	0	0	0	0	0	0	0	0	0
chr1_179121595_179133374_-	ENSG00000143322.19	ABL2	chr1	179121595	179133374	-	ENST00000344730.7	5	2	0	0	0	0	0	0	0	0	0	0	0	0	0	0	0	0	0.263939	0	0	0	0	0	0	0	0	0	0.297039	0	0	0	0	0	0	0	0	0	0	0	0	0
chr1_179121595_179131481_-	ENSG00000143322.19	ABL2	chr1	179121595	179131481	-	ENST00000344730.7	5	3	0	0	0	0	0	0	0	0	0	0	0	0.24094	0.571154	0	0	0	0	0	0	0	0	0	0	0	0	0	0	0	0	0.459022	0	0	0	0	0	0	0	0	0	0
chr1_179121595_179121867_-	ENSG00000143322.19	ABL2	chr1	179121595	179121867	-	ENST00000344730.7	5	5	0	0	0	0	0	0	0	0	0	0	0	0	0	0	0	0	0	0	0	0	0	0	0	0	0	0	0	0	0	0	0	0	0	0	0	0	0	0	0	0
chr1_179120190_179133374_-	ENSG00000143322.19	ABL2	chr1	179120190	179133374	-	ENST00000344730.7	6	2	0	0	0	0	0	0	0	0	0	0	0	0	0	0	0	0	0	0	0	0	0	0	0	0	0	0	0	0	0	0	0	0	0	0	0.27011	0	0	0	0	0
chr1_179120190_179131481_-	ENSG00000143322.19	ABL2	chr1	179120190	179131481	-	ENST00000344730.7	6	3	0	0	0	0	0	0	0	0	0.267055	0	0	0	0	0	1.11825	0	0	0	0	0	0	0	0	0	0	0	0	0	0	0	0	0	0	0	0	0.227166	0	0	0	0
chr1_179120190_179126672_-	ENSG00000143322.19	ABL2	chr1	179120190	179126672	-	ENST00000344730.7	6	4	0	0	0	0	0	0	0	0	0	0	0	0	0	0	0	0	0	0	0	0	0	0	0	0	0	0	0	0	0	0	0	0	0	0	0	0	0	0	0	0
chr1_179120190_179121867_-	ENSG00000143322.19	ABL2	chr1	179120190	179121867	-	ENST00000344730.7	6	5	0	0.306634	0.653311	0	1.38318	0.474508	0.511922	0	0	0.581	1.36408	0.679634	0.345927	0.916258	0	1.24067	0.901303	1.13621	2.30107	0.481627	1.21076	0.493394	0	0	0	0	0.596137	0	0.561837	0.709268	0.559112	0.429836	0	0.523879	0.478793	0.8864	1.12032	0.703563	0.703765	0
chr1_179118587_179131481_-	ENSG00000143322.19	ABL2	chr1	179118587	179131481	-	ENST00000344730.7	7	3	0	0	0	0	0.712794	0.256886	0	0	0	0	0.400444	0	0	0	0	0	0	0	0	0	0	0	0	0.424084	0	0	0.594077	0	0.297656	0	0	0	0	0	0	0	0	0	0	0
chr1_179118587_179126672_-	ENSG00000143322.19	ABL2	chr1	179118587	179126672	-	ENST00000344730.7	7	4	0	0	0.406021	0	0	0	0	0	0	0	0	0	0	0	0	0	0	0	0	0	0	0	0	0	0	0	0	0	0	0	0	0	0.341285	0	0	0	0	0	0	0
chr1_179118587_179121867_-	ENSG00000143322.19	ABL2	chr1	179118587	179121867	-	ENST00000344730.7	7	5	0	0.406923	0.653311	0	0	0.652864	0.216125	0	0.281873	2.25677	0	0	0.285577	0.336626	0	0.605658	0	0.620888	0.582524	0	0	0.740091	0.552789	0.798098	0	0.468839	0	0	0	0.93878	0	0	0.269653	0	0.509506	0	0.534836	0	0.688377	0
chr1_179118587_179120274_-	ENSG00000143322.19	ABL2	chr1	179118587	179120274	-	ENST00000344730.7	7	6	0	0	0.326655	0	0	0	0	0	0	0	0	0	0	0	0	0	0	0	0.582524	0	0	0	0	0	0	0	0	0	0	0	0	0	0	0	0.27011	0	0	0	0	0
chr1_179117332_179133374_-	ENSG00000143322.19	ABL2	chr1	179117332	179133374	-	ENST00000344730.7	8	2	0	0	0	1.34621	0	0	0	0	0	0	0	0	0	0	0	0	0	0	0.457664	0	0.262044	0	0	0	0	0	0	0	0.352232	0	0	0	0	0	0	0	0	0	0	0
chr1_179117332_179131481_-	ENSG00000143322.19	ABL2	chr1	179117332	179131481	-	ENST00000344730.7	8	3	0	0	0	0	0.401187	0	0	0	0	0	0	0	0	0	0	0	0	0	0	0	0	0	0	0	0	0	0	0	0	0	0	0.429836	0	0	0	0	0	0	0	0
chr1_179117332_179118764_-	ENSG00000143322.19	ABL2	chr1	179117332	179118764	-	ENST00000344730.7	8	7	0	0	0	0	0	0	0	0	0	0	0.400444	0.679634	0	0	0	0.664375	0.35381	0	0.681071	0.504909	0.262044	0	0	0	0	0	0	0.3276	0	0.250246	0	0	0.269653	0	0	0	0	0	0	0
chr1_179114878_179121867_-	ENSG00000143322.19	ABL2	chr1	179114878	179121867	-	ENST00000344730.7	9	5	0	0	0	0	0	0	0	0	0.281873	0	0	0	0	0	0	0.635017	0	0	0	0	0	0	0	0	0	0	0	0	0	0	0	0	0	0	0.257402	0	0	0	0	0
chr1_179114878_179120274_-	ENSG00000143322.19	ABL2	chr1	179114878	179120274	-	ENST00000344730.7	9	6	0	0	0	0	0	0	0	0	0	0	0.251606	0	0	0	0.316699	0	0	0	0	0.252769	0	0	0	0	0	0	0	0	0	0	0	0	0	0	0	0	0	0	0	0
chr1_179112309_179133374_-	ENSG00000143322.19	ABL2	chr1	179112309	179133374	-	ENST00000344730.7	10	2	0	0	0	0	0	0	0	0	0	0	0	0	0	0	0	0	0	0.292181	0	0	0	0	0	0	0	0	0	0	0	0	0	0	0	0	0	0	0	0	0	0
chr1_179112309_179131481_-	ENSG00000143322.19	ABL2	chr1	179112309	179131481	-	ENST00000344730.7	10	3	0	0	0	0	0	0	0	0	0	0	0	0	0	0	0.633398	0	0	0	0	0	0.234719	0	0	0	0	0	0	0.3276	0	0	0	0	0	0	0	0	0	0	0	0
chr1_179112309_179121867_-	ENSG00000143322.19	ABL2	chr1	179112309	179121867	-	ENST00000344730.7	10	5	0	0	0	0	0	0	0.432249	0	0	1.64215	0	0.318948	0.691854	0	0	0	0	0	0	0	0	0	0	0.798098	0	0	0.496832	0	0	0	0	0	0	0	0	0	0	0.16834	0.344189	0
chr1_179112309_179120274_-	ENSG00000143322.19	ABL2	chr1	179112309	179120274	-	ENST00000344730.7	10	6	0	0	0	0	0	0	0	0	0	0	0	0	0	0	0	0	0	0	0	0	0	0	0	0	0	0	0	0	0	0	0	0	0	0	0	0	0	0	0	0
chr1_179112309_179118764_-	ENSG00000143322.19	ABL2	chr1	179112309	179118764	-	ENST00000344730.7	10	7	0	0	0	0	0	0.256886	0	0	0	0	0	0	0	0	0	0	0	0	0	0	0	0	0	0	0	0	0	0	0	0	0	0	0	0	0	0	0	0	0	0
chr1_179112309_179117516_-	ENSG00000143322.19	ABL2	chr1	179112309	179117516	-	ENST00000344730.7	10	8	0	0	0	0	0	0.435243	0	0	0	0	0	0	0	0	0	0	0	0	0	0	0	0	0	0	0	0	0	0	0	0	0	0	0	0	0	0	0	0	0	0
chr1_179112309_179115030_-	ENSG00000143322.19	ABL2	chr1	179112309	179115030	-	ENST00000344730.7	10	9	0	0	0	0.604644	0	0	0	0	0	0	0	0	0	0	0	0	0	0	0	0	0	0	0	0	0	0	0	0	0	0	0	0	0	0	0	0	0.534836	0	0	0
chr1_179110282_179133374_-	ENSG00000143322.19	ABL2	chr1	179110282	179133374	-	ENST00000344730.7	11	2	0	0	0	0	0	0	0	0	0	0	0	0	0	0	0	0	0	0	0	0	0	0	0	0	0	0	0	0	0	0	0	0	0	0	0	0	0	0	0	0
chr1_179110282_179131481_-	ENSG00000143322.19	ABL2	chr1	179110282	179131481	-	ENST00000344730.7	11	3	0.270788	0	0	0	0	0	0	0	0	0	0	0	0	0	0	0	0	0	0	0	0	0	0	0.584256	0	0	0	0	0	0	0	0	0	0	0	0	0	0	0	0
chr1_179110282_179121867_-	ENSG00000143322.19	ABL2	chr1	179110282	179121867	-	ENST00000344730.7	11	5	0	0	0	0	0	0	0.432249	0	0	0	0	0.24094	0	0.374527	0	0	0	0	0	0.276051	0	0.187335	0	0	0	0	0	0	0	0.250246	0	0	0.225925	0	0	0	0.267418	0	0.567498	0
chr1_179110282_179120274_-	ENSG00000143322.19	ABL2	chr1	179110282	179120274	-	ENST00000344730.7	11	6	0	0	0	0	0	0	0	0	0	0	0	0	0	0	0	0	0	0	0	0	0	0	0	0	0	0	0.496832	0	0	0	0	0.298654	0	0	0	0	0	0	0.344189	0
chr1_179110282_179118764_-	ENSG00000143322.19	ABL2	chr1	179110282	179118764	-	ENST00000344730.7	11	7	0	0	0	0	0	0	0	0	0	0	0	0	0	0	0	0	0	0	0	0	0	0	0	0	0	0	0	0	0	0	0	0	0	0	0	0	0	0	0	0
chr1_179110282_179112398_-	ENSG00000143322.19	ABL2	chr1	179110282	179112398	-	ENST00000344730.7	11	10	0	0	0.406021	0	0.535785	0	0.255961	0	0	0	0	0.438693	0	0	0	0	0	0	0	0	0	0.511333	0	0	0	0	0	0	0.297656	0	0	0	0	0	0.736195	0	0.267418	0	0	0
chr1_179109208_179133374_-	ENSG00000143322.19	ABL2	chr1	179109208	179133374	-	ENST00000344730.7	12	2	0	0.343846	0	0	0.224177	0	0	0	1.18945	0	0	0	0	0	0	0	0	0	0	0	0	0	0	0	0	0	0	0	0	0	0	0	0	0	0	0	0	0	0	0
chr1_179109208_179131481_-	ENSG00000143322.19	ABL2	chr1	179109208	179131481	-	ENST00000344730.7	12	3	0	0.343846	0	0	0	0	0	0	0.267055	0	0	0	0	0	0	0	0	0	0	0	0	0	0	0	0	0	0	0	0	0	0	0	0	0	0	0	0	0	0	0
chr1_179109208_179112398_-	ENSG00000143322.19	ABL2	chr1	179109208	179112398	-	ENST00000344730.7	12	10	0	0	0	0	0	0	0.255961	0	0	0	0	0	0	0	0	0	0	0	0	0	0	0	0	0	0	0	0	0	0	0	0	0	0	0	0	0	0	0	0	0
chr1_75728401_75734871_+	ENSG00000117054.13	ACADM	chr1	75728401	75734871	+	ENST00000370834.9	2	7	0	0	0	0	0	0	0	0	0	0	0	0	0	0	0	0	0	0	0	0.276051	0	0	0	0	0	0	0	0	0	0	0	0	0	0	0	0	0	0	0	0
chr1_75728401_75740110_+	ENSG00000117054.13	ACADM	chr1	75728401	75740110	+	ENST00000370834.9	2	8	0	0.306634	0	0	0	0.435243	0	0	0	0	0	0	0	0	0	0.291251	0	0	0	0	0	0	0	0	0	0	0	0	0	0.280616	0	0.298654	0.341285	0.261939	0	0	0.292743	0	0	0
chr1_75728401_75750546_+	ENSG00000117054.13	ACADM	chr1	75728401	75750546	+	ENST00000370834.9	2	11	0	0.343846	0	0	0	0	0	0	0	0	0	0.318948	0	0	0	1.2291	0	0.292181	0.22612	0	0	0	0	0	0	0	0	0	0	0.918045	0	0	0	0	0	0	0	0.16834	0	0
chr1_75732644_75732922_+	ENSG00000117054.13	ACADM	chr1	75732644	75732922	+	ENST00000370834.9	3	4	0	0	0	0	0	0	0	0	0	0	0	0	0	0	0	0	0	0	0.22612	0	0	0	0	0	0	0	0	0	0	0	0	0	0	0	0	0	0	0	0	0
chr1_75732644_75733628_+	ENSG00000117054.13	ACADM	chr1	75732644	75733628	+	ENST00000370834.9	3	6	0	0	0	0	0	0	0	0	0	0	0	0	0	0	0	0	0	0	0	0	0	0	0	0	0	0	0	0	0	0.561233	0	0	0	0	0	0	0	0	0	0
chr1_75732644_75734871_+	ENSG00000117054.13	ACADM	chr1	75732644	75734871	+	ENST00000370834.9	3	7	0	0	0	0	0	0	0	0.276959	0.267055	0.547384	0	0	0	0	0	0.332188	0.263939	0.584363	0	0	0.262044	0.170444	0	0.716212	1.38541	0	0	0	0	0	0	0.859673	0.269653	0.188509	0	0	0	0	0	0
chr1_75732644_75740110_+	ENSG00000117054.13	ACADM	chr1	75732644	75740110	+	ENST00000370834.9	3	8	0	0	0	0	0	0	0	0	0	0	0	0	0	0	0	0	0	0	0	0	0	0	0	0	0	0	0	0	0	0	0	0.551589	0	0	0	0	0	0	0	0
chr1_75732644_75745914_+	ENSG00000117054.13	ACADM	chr1	75732644	75745914	+	ENST00000370834.9	3	9	0	0	0.494341	0	0	0	0	0	0	0	0	0	0	0	0	0.291251	0.263939	0	0	0	0	0	0	0	0	0	0	0	0	0	0	0	0	0	0	0	0	0	0	0
chr1_75732644_75749559_+	ENSG00000117054.13	ACADM	chr1	75732644	75749559	+	ENST00000370834.9	3	10	0	0	0	0	0	0	0	0	0	0	0	0	0	0.187263	0	0	0	0	0	0	0	0	0	0	0	0	0	0	0	0	0	0	0	0	0	0	0	0	0	0
chr1_75732644_75750546_+	ENSG00000117054.13	ACADM	chr1	75732644	75750546	+	ENST00000370834.9	3	11	0	0	0	0.604644	0	0	0	0	0	0	0	0.24094	0.285577	0.187263	0	0.996563	0.273746	0	0	0	0	0	0	0.424084	0	0	0.297039	0.176584	0	0	0	0	0	0.680851	0.257402	0	0	0	0	0
chr1_75734791_75740110_+	ENSG00000117054.13	ACADM	chr1	75734791	75740110	+	ENST00000370834.9	7	8	0	0.306634	0	0	0	0	0	0	0.267055	0	0	0	0	0	0	0	0	0	0	0	0	0	0	0	0	0	0.298068	0	0	0	0	0	0	0	0	0	0	0.338014	0	0
chr1_75734791_75745914_+	ENSG00000117054.13	ACADM	chr1	75734791	75745914	+	ENST00000370834.9	7	9	0	0	0	0	0	0	0	0	0	0	0	0	0.285577	0	0	0	0	0	0.22612	0	0	0	0	0	0	0	0	0	0.297656	0	0	0	0	0	0	0.227166	0	0	0	0
chr1_75739980_75745914_+	ENSG00000117054.13	ACADM	chr1	75739980	75745914	+	ENST00000370834.9	8	9	0	0	0	0	0	0	0	0	0	0	0	0	0	0	0	0	0	0	0	0	0	0	0	0	0	0	0	0	0	0	0	0	0	0	0	0	0	0	0	0
chr1_75739980_75749559_+	ENSG00000117054.13	ACADM	chr1	75739980	75749559	+	ENST00000370834.9	8	10	0	0.306634	0	0	0.311608	0	0	0	0.594723	0	0.251606	0	0	0	0	0	0	0	0	0	0	0	0	0	0	0	0	0.26688	0	0	0	0	0	0	0.239396	0	0	0.674694	0	0
chr1_75739980_75750546_+	ENSG00000117054.13	ACADM	chr1	75739980	75750546	+	ENST00000370834.9	8	11	1.83733	0.687692	0.326655	0.673104	0.896708	1.68041	0	0.276959	1.12883	1.67577	0.790169	1.11978	0.345927	1.17819	0	2.8491	0	0.84403	0.683784	0	1.46296	0.417141	0	1.27225	0	1.37016	0.891116	0	0.297656	0.530862	0.827238	0.298654	0.269653	1.81215	0.810329	0.355187	0.534836	0.338014	0	0
chr1_75745806_75750546_+	ENSG00000117054.13	ACADM	chr1	75745806	75750546	+	ENST00000370834.9	9	11	0	0	0	0	0	0	0.255961	0	0	0	0.251606	0	0	0	0	0.873753	0	0	0	0	0	0.187335	0.310838	0	0	0	0	0	0.297656	0.280616	0	0	0	0	0	0	0	0	0	0
chr1_75745806_75761370_+	ENSG00000117054.13	ACADM	chr1	75745806	75761370	+	ENST00000370834.9	9	12	0	0	0	0	0	0.388474	0	0	0	0	0	0	0	0	0	0	0	0	0	0	0	0	0	0	0	0	0	0	0	0	0	0	0	0	0	0	0	0	0	0
chr1_75749419_75750546_+	ENSG00000117054.13	ACADM	chr1	75749419	75750546	+	ENST00000370834.9	10	11	0	0	0	0	0	0	0	0	0	0	0.860867	0	0	0	0	0	0	0	0	0	0	0	0	0	0	0	0	0	0	0	0	0	0	0.340425	0	0	0.585486	0	0	0
chr1_1299345_1302975_-	ENSG00000131584.18	ACAP3	chr1	1299345	1302975	-	ENST00000354700.9	10	4	0	0	0	0	0	0	0	0	0	0	0	0	0	0	0	0	0	0	0	0	0	0	0	0	0	0	0	0	0	0	0	0	0	0	0	0	0	0	0	0
chr1_1298013_1304143_-	ENSG00000131584.18	ACAP3	chr1	1298013	1304143	-	ENST00000354700.9	13	2	0	0	0	0	0	0	0	0	0	0	0	0	0	0	0	0	0	0	0	0	0	0	0	0	0	0	0	0	0	0	0	0	0	0	0	0.227166	0	0	0	0
chr1_1295447_1296633_-	ENSG00000131584.18	ACAP3	chr1	1295447	1296633	-	ENST00000354700.9	19	15	0	0	0	0	0	0.217621	0	0	0	0	0	0	0	0	0	0	0	0	0	0	0	0	0	0	0	0	0	0	0	0	0	0	0	0	0	0	0	0	0	0
chr1_226164789_226166000_-	ENSG00000182827.8	ACBD3	chr1	226164789	226166000	-	ENST00000366812.5	3	2	0	0	0	0	0	0	0	0	0	0	0	0	0	0	0	0	0	0	0	0	0.469438	0	0	0	0	0	0	0	0	0	0	0	0	0	0	0	0	0	0.359576	0
chr1_226161531_226166000_-	ENSG00000182827.8	ACBD3	chr1	226161531	226166000	-	ENST00000366812.5	4	2	0	0	0	0	0	0	0	0	0	0	0	0	0	0	0	0	0	0	0	0	0	0	0	0	0	0	0	0	0	0	0	0	0	0	0	0	0	0.16834	0	0
chr1_226159184_226166000_-	ENSG00000182827.8	ACBD3	chr1	226159184	226166000	-	ENST00000366812.5	5	2	0	0	0	0	0	0	0.511922	0	0	0	0	0	0	0	0	0	0	0	0	0	0	0	0	0	0	0	0	0	0	0	0	0	0	0	0	0	0.447303	0	0	0
chr1_226159184_226161689_-	ENSG00000182827.8	ACBD3	chr1	226159184	226161689	-	ENST00000366812.5	5	4	0	0	0	0	0	0	0	0	0	0	0	0	0.966029	0.168313	0	0	0	0	0	0	0	0	0	0	0	0	0	0	0	0	0	0	0	0	0	0	0	0	0	0
chr1_226159184_226159358_-	ENSG00000182827.8	ACBD3	chr1	226159184	226159358	-	ENST00000366812.5	5	5	0	0	0	0	0	0	0	0	0	0	0	0	0	0	0	0	0	0.292181	0	0	0	0	0	0	0	0	0	0.176584	0	0	0	0	0	0	0	0	0	0	0	0
chr1_226154647_226166000_-	ENSG00000182827.8	ACBD3	chr1	226154647	226166000	-	ENST00000366812.5	6	2	0	0	0	0	0	0	0	0	0	0	0	0	0	0	0	0	0	0	0	0	0	0	0	0	0	0	0	0	0	0	0	0	0	0	0	0	0	0	0	0
chr1_226154647_226161689_-	ENSG00000182827.8	ACBD3	chr1	226154647	226161689	-	ENST00000366812.5	6	4	0	0	0	0	0	0	0	0.22942	0	0	0	0	0	0	0	0	0	0	0	0	0	0	0	0	0	0	0	0.26688	0	0	0	0	0	0	0	0	0	0	0	0
chr1_226154647_226159358_-	ENSG00000182827.8	ACBD3	chr1	226154647	226159358	-	ENST00000366812.5	6	5	0	0	0	0	0	0	0	0	0	0	0	0	0	0	0	0	0	0	0	0	0	0	0	0	0	0	0	0	0	0	0	0	0	0	0	0	0	0	0	0
chr1_226154647_226154833_-	ENSG00000182827.8	ACBD3	chr1	226154647	226154833	-	ENST00000366812.5	6	6	0	0	0	0	0	0	0	0	0	0	0	0	0	0	0	0	0	0	0	0	0	0	0	0	0	0	0.596137	0	0	0	0	0	0	0	0	0	0	0	0	0
chr1_226152335_226166000_-	ENSG00000182827.8	ACBD3	chr1	226152335	226166000	-	ENST00000366812.5	7	2	0	0	0	0	0	0	0	0	0	0	0	0	0	0	0	0	0	0	0	0	0	0	0	0	0	0	0	0	0	0	0	0	0	0	0	0	0.267418	0	0.359576	0
chr1_226152335_226161689_-	ENSG00000182827.8	ACBD3	chr1	226152335	226161689	-	ENST00000366812.5	7	4	0	0	0	0	0	0	0	0	0	0	0	0	0	0	0	0	0	0	0	0	0	0	0	0	0	0	0	0	0	0	0	0	0	0	0	0	0.267418	0	0	0
chr1_226152335_226159358_-	ENSG00000182827.8	ACBD3	chr1	226152335	226159358	-	ENST00000366812.5	7	5	0	0	0	0	0	0	0	0	0	0	0	0	0	0	0.316699	0	0	0	0	0	0	0	0	0	0	0	0	0	0	0	0	0.252936	0	0	0	0	0.267418	0	0	0
chr1_226152335_226154833_-	ENSG00000182827.8	ACBD3	chr1	226152335	226154833	-	ENST00000366812.5	7	6	0	0	0	0	0	0	0	0	0	0	0	0	0	0	0	0	0	0	0	0	0	0	0	0	0	0	0	0	0	0	0	0	0	0	0	0	0	0	0	0
chr1_180492269_180495525_-	ENSG00000230124.7	ACBD6	chr1	180492269	180495525	-	ENST00000645415.1	3	2	0	0	0	0	0	0	0	0	0	0	0	0	0	0	0	0	0	0	0	0	0	0	0	0	0	0	0.594077	0	0	0	0	0	0	0	0	0	0	0	0.719152	0
chr1_180430180_180495525_-	ENSG00000230124.7	ACBD6	chr1	180430180	180495525	-	ENST00000645415.1	4	2	0	0	0	0	0	0	0	0	0	0	0	0	0	0	0	0	0	0	0	0	0	0	0	0	0	0	0	0	0	0	0	0	0	0	0	0	0	0	0.344189	0
chr1_180430180_180492365_-	ENSG00000230124.7	ACBD6	chr1	180430180	180492365	-	ENST00000645415.1	4	3	0	0	0	0	0	0	0	0	0	0	0	0	0	0	0	0	0	0	0	0	0	0	0	0	0	0	0	0	0	0.229511	0	0	0	0	0	0	0	0	0	0
chr1_180413366_180495525_-	ENSG00000230124.7	ACBD6	chr1	180413366	180495525	-	ENST00000645415.1	5	2	0	0	0	0	0	0	0	0	0	0	0	0	0	0	0	0	0	0	0	0	0	0	0	0	0	0	0	0.176584	0	0	0	0	0	0	0	0	0	0	0.344189	0
chr1_180413366_180430262_-	ENSG00000230124.7	ACBD6	chr1	180413366	180430262	-	ENST00000645415.1	5	4	0	0	0	0	0.401187	0	0	0	0	0	0	0	0	0	0.316699	0	0	0	0.228832	0	0	0	0	0.424084	0	0	0	0	0	0	0	0	0	0.523879	0	0	0	0	0.688377	0
chr1_180397516_180495525_-	ENSG00000230124.7	ACBD6	chr1	180397516	180495525	-	ENST00000645415.1	6	2	0	0.406923	0	0	1.51992	0.388474	0.255961	0	0.267055	0	0	0	0	0	0.483172	0.873753	0	0	0.228832	0	0.786132	0.187335	0	0.584256	0.692705	0	0	0	0	0	0.559112	0	0	0.523879	0.54022	1.10243	0.447303	0.917209	0.719152	0
chr1_180397516_180492365_-	ENSG00000230124.7	ACBD6	chr1	180397516	180492365	-	ENST00000645415.1	6	3	0	0	0	0	0	0	0	0	0	0	0	0	0	0	0	0	0	0	0	0	0	0	0	0	0	0	0	0	0	0	0	0	0	0	0	0	0	0	0	0
chr1_180397516_180430262_-	ENSG00000230124.7	ACBD6	chr1	180397516	180430262	-	ENST00000645415.1	6	4	0.270788	0.919902	0	0	6.69125	1.9373	2.73794	1.19766	0	0	0.573911	0.956843	4.21004	2.16803	1.74997	1.165	0	2.50381	3.6035	0	1.18344	0.869112	2.95682	1.27225	1.16702	0	1.68911	1.39512	1.29978	2.98457	0.279556	1.28951	0.269653	1.13106	1.02431	0	1.095	0.535223	5.95364	1.09342
chr1_180397516_180413471_-	ENSG00000230124.7	ACBD6	chr1	180397516	180413471	-	ENST00000645415.1	6	5	4.65756	1.22654	1.30638	1.81393	14.85	4.3491	2.56165	2.30248	2.75946	1.17668	0.790169	2.08354	1.20266	2.35363	4.52514	2.80816	6.76008	8.80174	3.60621	2.73075	1.43564	1.9414	1.51975	5.44117	2.77082	2.73525	4.36878	2.34434	1.00212	5.13076	0.838668	7.62533	0.677776	1.57164	1.7658	2.04449	5.28836	1.43733	25.4868	0
chr1_180314692_180495525_-	ENSG00000230124.7	ACBD6	chr1	180314692	180495525	-	ENST00000645415.1	8	2	0	0	0	0	0	0	0	0	0	0	0	0	0	0	0	0	0	0	0	0	0	0	0	0	0	0	0	0	0	0	0	0.429836	0	0	0	0	0	0	0	0
chr1_180314692_180430262_-	ENSG00000230124.7	ACBD6	chr1	180314692	180430262	-	ENST00000645415.1	8	4	0	0	0	0	0	0	0	0	0	0	0	0	0	0	0	0	0	0	0	0	0	0	0	0	0	0	0	0	0	0	0	0	0	0	0	0	0	0	0	0.364473
chr1_180314692_180326562_-	ENSG00000230124.7	ACBD6	chr1	180314692	180326562	-	ENST00000645415.1	8	7	0	0	0	0	0	0	0	0	0	0	0	0	0	0	0	0	0	0	0	0	0	0	0	0	0	0	0	0	0	0	0	0	0	0	0	0	0	0	0	0
chr1_180288270_180495525_-	ENSG00000230124.7	ACBD6	chr1	180288270	180495525	-	ENST00000645415.1	9	2	0	0	0	0	0	0	0	0	0	0	0	0	0	0	0	0	0	0	0	0	0	0	0	0	0	0	0	0	0	0	0	0	0	0	0	0	0	0	0	0
chr1_180288270_180288517_-	ENSG00000230124.7	ACBD6	chr1	180288270	180288517	-	ENST00000645415.1	9	9	0	0	0	0	0	0	0	0	0	0	0	0	0	0	0	0	0	0	0	0	0	0	0	0	0	0	0	0	0	0	0	0	0.225925	0	0	0	0	0	0	0
chr1_180281306_180288517_-	ENSG00000230124.7	ACBD6	chr1	180281306	180288517	-	ENST00000645415.1	10	9	0	0	0	0	0	0	0	0	0	0	0.400444	0	0	0.355576	0	1.32875	0.263939	0	0	0	0.262044	0	0	0	0	0	0	0	0.297656	0	0.279556	0	0	0.188509	0	0.227166	0	0	0.344189	0.364473
chr1_180273937_180275412_-	ENSG00000230124.7	ACBD6	chr1	180273937	180275412	-	ENST00000645415.1	12	11	0	0	0	0	0	0	0	0	0	0	0	0	0	0	0	0	0	0	0	0	0	0	0	0	0	0	0	0	0	0.280616	0	0	0	0	0	0	0	0	0	0
chr1_180273338_180275412_-	ENSG00000230124.7	ACBD6	chr1	180273338	180275412	-	ENST00000645415.1	13	11	0	0	0	0	0	0	0	0	0	0	0	0	0	0	0	0	0	0	0	0	0	0	0	0	0	0	0	0	0	0	0	0	0	0	0	0	0	0	0.567498	0
chr1_180272613_180274112_-	ENSG00000230124.7	ACBD6	chr1	180272613	180274112	-	ENST00000645415.1	14	12	0	0	0	0	0	0	0	0	0	0	0	0	0	0	0	0	0	0	0.457664	0	0	0	0	0	0	0	0	0	0	0	0	0	0	0	0	0	0	0	0	0
chr1_54584655_54585904_+	ENSG00000162390.17	ACOT11	chr1	54584655	54585904	+	ENST00000371316.3	2	3	0	0	0	0	0	0	0	0	0	0	0	0	0	0	0	0	0	0	0	0	0	0	0	0	0	0	0	0	0	0	0	0	0	0	0	0	0	0	0	0
chr1_54584655_54594039_+	ENSG00000162390.17	ACOT11	chr1	54584655	54594039	+	ENST00000371316.3	2	5	0	0	0	0	0	0	0	0	0	0	0	0	0	0	0	0	0	0	0	0	0	0	0	0	0	0	0	0	0	0	0	0	0	0	0	0	0	0	0	0
chr1_54584655_54603937_+	ENSG00000162390.17	ACOT11	chr1	54584655	54603937	+	ENST00000371316.3	2	11	0	0	0	0	0	0.256886	0	0	0	0	0	0	0	0	0	0	0	0	0	0	0	0	0	0	0	0	0	0	0	0	0	0	0	0	0	0	0	0	0	0
chr1_54584655_54608068_+	ENSG00000162390.17	ACOT11	chr1	54584655	54608068	+	ENST00000371316.3	2	15	0	0	0	0	0	0	0	0	0	0	0	0	0	0	0	0	0	0	0	0	0	0	0	0	0	0	0	0	0	0	0	0	0	0	0	0	0	0	0	0
chr1_54592546_54597415_+	ENSG00000162390.17	ACOT11	chr1	54592546	54597415	+	ENST00000371316.3	4	7	0	0	0	0	0	0	0	0	0	0	0	0	0	0	0	0	0	0.292181	0.517381	0	0	0	0	0	0	0	0	0	0	0	0	0	0	0	0	0	0	0	0	0
chr1_54592546_54599415_+	ENSG00000162390.17	ACOT11	chr1	54592546	54599415	+	ENST00000371316.3	4	8	0	0.406923	0	0	0	0	0	0	0	0	0	0	0	0	0	0	0	0	0.291262	0	0	0	0	0	0	0	0	0	0	0	0	0	0	0	0	0	0	0	0	0
chr1_54592546_54608068_+	ENSG00000162390.17	ACOT11	chr1	54592546	54608068	+	ENST00000371316.3	4	15	0	0	0	0	0.311608	0	0	0	0	0	0	0	0	0	0	0	0	0	0	0	0	0	0	0	0	0	0	0	0	0	0	0	0	0	0	0	0	0	0	0
chr1_54593941_54599415_+	ENSG00000162390.17	ACOT11	chr1	54593941	54599415	+	ENST00000371316.3	5	8	0	0	0	0	0	0	0	0	0	0	0	0	0	0	0	0	0	0	0	0	0	0	0	0	0	0	0	0	0	0	0	0	0	0	0	0	0	0	0	0
chr1_54593941_54608068_+	ENSG00000162390.17	ACOT11	chr1	54593941	54608068	+	ENST00000371316.3	5	15	0	0	0	0	0	0	0	0	0	0	0	0	0	0	0	0	0	0	0	0	0	0.170444	0	0	0	0	0	0	0	0	0	0	0	0	0	0	0	0	0	0
chr1_6339433_6349866_-	ENSG00000097021.19	ACOT7	chr1	6339433	6349866	-	ENST00000377860.8	3	2	0	0	0	0	0	0	0	0	0	0	0	0	0	0	0	0	0	0	0	0	0	0	0.310838	0	0	0	0	0	0	0	0	0	0	0	0	0	0	0	0	0
chr1_6333477_6349866_-	ENSG00000097021.19	ACOT7	chr1	6333477	6349866	-	ENST00000377860.8	4	2	0	0	0	0	0	0	0	0	0	0	0	0	0	0	0	0	0	0	0	0	0	0	0	0	0	0	0	0	0	0	0	0	0	0	0.257402	0.227166	0	0	0	0
chr1_6327299_6349866_-	ENSG00000097021.19	ACOT7	chr1	6327299	6349866	-	ENST00000377860.8	5	2	0.270788	0	0	0	0	0	0	0	0	0	0	0	0	0	0	0	0	0	0	0	0	0	0	0	0	0	0	0	0.561837	0.229511	0	0.252936	0	0	0	0	0	0	0	0
chr1_6327299_6333568_-	ENSG00000097021.19	ACOT7	chr1	6327299	6333568	-	ENST00000377860.8	5	4	0	0	0	0	0	0	0	0	0	0	0	0	0	0	0	0	0	0	0	0	0	0	0	0	0	0	0	0	0	0	0	0	0	0	0	0	0	0	0	0
chr1_6318492_6349866_-	ENSG00000097021.19	ACOT7	chr1	6318492	6349866	-	ENST00000377860.8	6	2	2.71682	0	0	0	0	0.256886	0	0.276959	0.281873	0	0.251606	0	0	0.186709	0	0	0	0.584363	0	0	0.479282	0	0.939387	0	0	0	0	0	0	0	0	0	0.269653	0.261939	0.496798	0.355187	0.585486	0.67336	0.344189	0
chr1_6318492_6333568_-	ENSG00000097021.19	ACOT7	chr1	6318492	6333568	-	ENST00000377860.8	6	4	0	0	0	0	0	0	0	0	0	0	0	0	0	0	0	0	0	1.24178	0	0	0.479282	0	0	0	0	0	0	0	0	0	0	0	0	0	0	0	0	0	0	0
chr1_6318492_6327413_-	ENSG00000097021.19	ACOT7	chr1	6318492	6327413	-	ENST00000377860.8	6	5	0	0	0	0	0	0	0	0	0	0	0.251606	0	0	0	0	0	0	0	0	0	0	0.170444	0	0	0	0	0	0	0	0	0	0.298654	0	0	0	0	0	0	0	0
chr1_6294864_6349866_-	ENSG00000097021.19	ACOT7	chr1	6294864	6349866	-	ENST00000377860.8	7	2	0	0	0	0	0	0	0	0	0	0	0	0	0	0	0	0	0	0	0	0	0	0	0	0	0	0	0	0	0	0	0	0	0	0	0	0	0	0	0	0
chr1_6294864_6333568_-	ENSG00000097021.19	ACOT7	chr1	6294864	6333568	-	ENST00000377860.8	7	4	0	0	0	0	0	0	0	0	0	0	0	0	0	0	0	0	0	0	0	0	0	0.187335	0	0	0	0	0	0	0	0	0	0	0	0	0	0	0	0	0.688377	0
chr1_6294864_6327413_-	ENSG00000097021.19	ACOT7	chr1	6294864	6327413	-	ENST00000377860.8	7	5	0	0	0	0	0	0	0	0	0	0	0	0	0	0	0	0	0	0	0	0	0	0	0	0	0	0	0	0	0	0	0	0	0	0	0	0	0	0	0	0
chr1_6294864_6318578_-	ENSG00000097021.19	ACOT7	chr1	6294864	6318578	-	ENST00000377860.8	7	6	0	0	0	0	0	0	0	0	0	0	0	0.24094	0	0	0	0	0	0	0	0	0	0	0	0	0	0	0	0	0	0	0	0	0	0	0	0	0	0	0	0
chr1_6281102_6349866_-	ENSG00000097021.19	ACOT7	chr1	6281102	6349866	-	ENST00000377860.8	9	2	0	0	0	0	0	0	0	0.22942	0	0	0	0	0	0	0	0	0	0	0	0	0	0	0	0	0	0	0	0	0	0	0	0	0	0	0	0	0	0	0	0
chr1_6281102_6294980_-	ENSG00000097021.19	ACOT7	chr1	6281102	6294980	-	ENST00000377860.8	9	7	2.9445	0	0	0	0	0	0	0	0	0	0.251606	0	0	1.79628	0.241586	0	0	0	0	0	0	0	0	0	0	0	0.496832	0	0.297656	0	0	0	0	0	0	0.648101	0.585486	0	0.359576	0
chr1_147652592_147655248_-	ENSG00000162836.11	ACP6	chr1	147652592	147655248	-	ENST00000487562.5	7	5	0	0	0	0	0	0	0	0	0	0	0	0	0	0	0	0	0	0	0	0	0	0	0	0	0	0	0	0.176584	0	0	0	0	0	0	0	0	0	0	0	0
chr1_147658960_147659775_-	ENSG00000162836.11	ACP6	chr1	147658960	147659775	-	ENST00000583509.6	4	2	0	0	0	0	0	0.256886	0	0	0.594723	0	0	0	0	0	0	1.21132	1.15543	0	0.520094	0	0.234719	0	0.276394	0	0	0	0	0	0	0.250246	0	0	0	0.864304	0	0	0.267418	0.16834	0	0
chr1_147654194_147659775_-	ENSG00000162836.11	ACP6	chr1	147654194	147659775	-	ENST00000583509.6	6	2	0	0	0	0	0.623215	0	0	0	0	0	0	0	0	0	0	0	0	0	0	0	0	0	0	0	0	0	0	0.176584	0	0	0	0	0	0	0.257402	0	0	0	0	0
chr1_147654194_147659039_-	ENSG00000162836.11	ACP6	chr1	147654194	147659039	-	ENST00000583509.6	6	4	0	0	0	0	0	0.256886	0	0	0	0	0	0	0	0	0	0	0	0	0	0	0	0	0	0	0	0	0	0	0	0	0	0	0	0	0	0	0	0	0	0
chr1_147652449_147659775_-	ENSG00000162836.11	ACP6	chr1	147652449	147659775	-	ENST00000583509.6	7	2	0.241694	0	0	0	0	0.513773	0	0	0	0	0	0	0	0	0	0	0	0	0	0	0	0	0	0	0	0	0	0.26688	0	0	0	0	0	0	0	0	0	0	0	0
chr1_147652449_147655248_-	ENSG00000162836.11	ACP6	chr1	147652449	147655248	-	ENST00000583509.6	7	5	0	0	0	0	0	0	0	0	0	0	0	0	0	0	0	0	0	0	0	0	0	0	0	0	0	0	0	0	0	0	0	0	0	0	0.239396	0	0	0	0	0
chr1_147650143_147659775_-	ENSG00000162836.11	ACP6	chr1	147650143	147659775	-	ENST00000583509.6	8	2	0	0	0	0	1.0244	0.217621	0.432249	0	0.281873	0	0	0	0	0	0	0	0.821239	0	0.582524	0	0	0.417141	0	0	0	0.791825	0	0.857352	0.297656	0	0	0	0.269653	0.188509	0.257402	0	0.447303	0	0	0
chr1_147648246_147659775_-	ENSG00000162836.11	ACP6	chr1	147648246	147659775	-	ENST00000583509.6	9	2	0.783271	0	0.406021	0	2.318	1.16664	0.648374	0.68826	1.63197	0	0.251606	1.7214	0	0.186709	3.18408	2.44662	5.61291	4.3217	6.55494	0.276051	0.958564	1.1327	0.642334	0.584256	0	0.937678	1.78223	0.176584	1.29978	0.811479	1.10679	1.86199	0.682569	1.77026	1.23299	0.710375	0.267418	0.689796	0	1.74118
chr1_147648246_147659039_-	ENSG00000162836.11	ACP6	chr1	147648246	147659039	-	ENST00000583509.6	9	4	0	0	0	0	0	0	0	0	0	0	0	0	0.345927	0	0.316699	0	0	0	0	0	0	0.170444	0	0	0	0	0	0	0	0	0	0	0	0	0	0	0	0	0	0
chr1_147648246_147655248_-	ENSG00000162836.11	ACP6	chr1	147648246	147655248	-	ENST00000583509.6	9	5	0	0	0	0	0	0	0	0	0.281873	0	0	0	0	0	0	0	0	0	0	0	0	0	0	0	0	0	0	0	0	0	0	0	0	0	0	0	0	0	0	0
chr1_236717858_236731314_+	ENSG00000077522.12	ACTN2	chr1	236717858	236731314	+	ENST00000546208.5	2	7	0	0	0	0	0	0	0	0	0	0	0	0	0	0	0	0	0	0	0	0	0	0	0	0	0	0	0	0	0	0	0	0.298654	0	0	0	0	0	0	0	0
chr1_155054314_155054506_+	ENSG00000143537.13	ADAM15	chr1	155054314	155054506	+	ENST00000526491.5	6	6	0	0	0	0	0	0	0	0	0	0	0	0	0	0.187263	0	0	0	0	0	0	0	0	0	0	0	0	0	0.176584	0	0	0	0	0	0	0	0	0	0	0	0
chr1_155055790_155056470_+	ENSG00000143537.13	ADAM15	chr1	155055790	155056470	+	ENST00000526491.5	7	10	0	0	0	0	0	0	0	0	0.594723	0	0	0	0	0	0	0	0	0	0	0	0	0	0	0	0	0	0	0	0	0	0	0	0	0	0	0	0	0	0	0
chr1_155055790_155058787_+	ENSG00000143537.13	ADAM15	chr1	155055790	155058787	+	ENST00000526491.5	7	16	0	0	0	0	0	0	0	0	0	0	0	0	0	0	0	0	0	0	0	0	0	0	0	0	0	0	0	0	0	0	0	0	0	0	0	0	0	0	0	0
chr1_155058710_155060343_+	ENSG00000143537.13	ADAM15	chr1	155058710	155060343	+	ENST00000526491.5	16	18	0	0	0	0	0	0	0	0	0	0	0	0	0	0	0	0	0	0	0	0	0	0	0	0	0	0	0	0	0	0	0	0	0	0	0	0	0	0	0	0
chr1_155058710_155060832_+	ENSG00000143537.13	ADAM15	chr1	155058710	155060832	+	ENST00000526491.5	16	19	0	0	0	0	0	0	0	0	0	0	0	0	0	0	0	0	0	0	0	0	0	0	0	0	0	0	0	0.26688	0	0	0	0	0	0	0	0	0	0	0	0
chr1_150552205_150554467_+	ENSG00000143382.14	ADAMTSL4	chr1	150552205	150554467	+	ENST00000369039.9	3	7	0	0	0	0	0	0	0	0	0	0	0	0	0	0	0	0	0.35381	0	0	0	0	0	0	0	0	0	0	0	0	0	0	0	0	0	0	0	0	0	0	0
chr1_150552205_150557335_+	ENSG00000143382.14	ADAMTSL4	chr1	150552205	150557335	+	ENST00000369039.9	3	13	0	0	0	0	0	0	0	0	0	0	0	0	0	0	0	0	0.70762	0	0	0	0	0	0	0	0	0	0	0	0	0	0	0	0	0	0	0	0	0	0	0
chr1_154601041_154602626_-	ENSG00000160710.15	ADAR	chr1	154601041	154602626	-	ENST00000368474.8	2	2	0	0	0	0	0	0	0	0	0	0	0	0	0.620102	0	0	0	0.527878	0	0	0	0	0	0	0	0	0	0	0	0	0	0	0	0	0	0	0	0	0	0	0
chr1_154597123_154602626_-	ENSG00000160710.15	ADAR	chr1	154597123	154602626	-	ENST00000368474.8	5	2	0	0	0	0	0	0	0	0	0	0	0	0	0	0	0	0	0	0	0	0	0	0	0	0	0	0	0	0	0	0	0	0	0	0	0	0	0	0	0	0
chr1_154596805_154602626_-	ENSG00000160710.15	ADAR	chr1	154596805	154602626	-	ENST00000368474.8	6	2	0	0	0	0	0.759961	0	0	0	0	0	0	0	0	0	0	0	0	0	0	0	0	0.434032	0	0	0	0	0	0	0	0	0	0	0	1.31981	0	0	0	0	0	0
chr1_154596805_154598585_-	ENSG00000160710.15	ADAR	chr1	154596805	154598585	-	ENST00000368474.8	6	3	0	0	0	0	0	0	0	0	0	0	0	0	0	0	0	0	0	0	0	0	0	0	0	0	0	0	0	0	0	0	0	0	0	0.188509	0	0	0	0	0	0
chr1_154596805_154597267_-	ENSG00000160710.15	ADAR	chr1	154596805	154597267	-	ENST00000368474.8	6	5	0	0	0	0	0	0	0	0	0	0	0	0	0	0	0	0	0	0	0	0	0	0	0	0	0	0	0	0	0	0	0	0	0	0	0	0	0	0	0	0
chr1_154589369_154589928_-	ENSG00000160710.15	ADAR	chr1	154589369	154589928	-	ENST00000368474.8	9	8	0	0	0	0	0	0	0	0	0	0	0	0	0	0	0	0	0	0	0	0	0	0	0	0	0	0	0	0	0	0	0	0	0	0	0	0	0	0	0	0
chr1_154588551_154597267_-	ENSG00000160710.15	ADAR	chr1	154588551	154597267	-	ENST00000368474.8	10	5	0	1.43846	0	0	0	0	0.216125	0	0	0	0	0	0	0.187263	0.316699	0	0	0.620888	1.13874	0	0	0.417141	0	0	0	0.468839	0.298068	0.706337	0	0	0	0	0	0.188509	0.478793	0	0	0	0	0
chr1_154588125_154602626_-	ENSG00000160710.15	ADAR	chr1	154588125	154602626	-	ENST00000368474.8	11	2	0	0	0	0	0	0	0	0	0	0	0	0	0	0	0	0	0	0	0	0	0	0	0	0	0	0.322986	0	0	0	0	0	0	0	0	0	0	0	0	0	0
chr1_154588125_154598585_-	ENSG00000160710.15	ADAR	chr1	154588125	154598585	-	ENST00000368474.8	11	3	0	0	0	0	0	0	0	0	0	0	0	0	0	0	0	0	0	0	0	0	0	0.170444	0	0	0	0	0	0	0	0	0	0	0	0	0	0	0	0	0	0
chr1_154588125_154590409_-	ENSG00000160710.15	ADAR	chr1	154588125	154590409	-	ENST00000368474.8	11	7	0	0	0	0	0	0	0	0	0	0	0	0	0	0	0	0	0	0	0	0	0	0	0	0	0	0.432484	0	0	0	0	0	0	0	0	0	0	0	0	0	0
chr1_154588125_154588673_-	ENSG00000160710.15	ADAR	chr1	154588125	154588673	-	ENST00000368474.8	11	10	0	0	0	0	0	0	0	0	0	0	0	0	0	0	0	0	0	0	0	0	0	0	0	0	0	0	0	0	0	0	0	0	0	0	0	0	0	0	0	0
chr1_154588125_154588258_-	ENSG00000160710.15	ADAR	chr1	154588125	154588258	-	ENST00000368474.8	11	11	0	0	0	0	0	0	0	0	0	0	0	0	0	0	0	0	0	0	0	0	0	0	0	0	0	0	0	0	0	0	0	0	0	0	0	0	0	0	0	0
chr1_154586181_154588258_-	ENSG00000160710.15	ADAR	chr1	154586181	154588258	-	ENST00000368474.8	12	11	0	0	0	0	0	0	0	0	0	0	0	0	0	0	0	0	0.547492	0	0.228832	0	0	0	0	0	0	0	0	0	0	0.280616	0.547682	0	0	0	0	0	0	0	0.359576	0
chr1_226908522_226917660_+	ENSG00000163050.16	ADCK3	chr1	226908522	226917660	+	ENST00000366779.5	2	5	0	0	0	0	0	0	0	0	0	0	0	0	0	0	0	0	0	0	0	0	0	0	0	0	0	0	0	0	0	0	0	0	0	0	0	0	0	0	0	0
chr1_226961377_226965410_+	ENSG00000163050.16	ADCK3	chr1	226961377	226965410	+	ENST00000366779.5	7	8	0	0	0.406021	0	0	0	0	0	0	0	0	0	0	0	0	0	0	0	0	0	0	0	0	0	0	0	0	0	0	0	0	0	0	0	0	0	0	0	0	0
chr1_226961377_226965737_+	ENSG00000163050.16	ADCK3	chr1	226961377	226965737	+	ENST00000366779.5	7	9	0	0	0	0	0.401187	0.606096	0	0	0	0	0	0	0	0	0	0.302829	1.91622	0.714196	0	0	0	0	0	0	0.692705	0	0.297039	0	0.704464	0	0	0	0	0.565528	0	0	0	0.33668	0	0
chr1_226961377_226984941_+	ENSG00000163050.16	ADCK3	chr1	226961377	226984941	+	ENST00000366779.5	7	18	0	0	0	0	0	0	0	0	0	0	0	0	0	0	0.316699	0	0	0	0	0	0	0	0	0	0	0	0	0	0	0	0	0	0	0	0	0	0	0	0	0
chr1_226965000_226965737_+	ENSG00000163050.16	ADCK3	chr1	226965000	226965737	+	ENST00000366779.5	8	9	0	0	0	0	0	0	0	0	0	0	0	0	0	0	0	0	0	0	0	0	0	0	0	0	0	0	0	0	0	0	0	0	0	0	0	0	0	0	0	0
chr1_226982027_226985340_+	ENSG00000163050.16	ADCK3	chr1	226982027	226985340	+	ENST00000366779.5	11	19	0	0	0	0	0	0	0	0	0	0	0	0	0	0	0	0	0	0	0	0	0	0	0	0	0	0	0	0	0	0	0	0	0	0	0	0	0	0	0	0
chr1_226982894_226984235_+	ENSG00000163050.16	ADCK3	chr1	226982894	226984235	+	ENST00000366779.5	13	16	0	0	0	0	0	0	0	0	0	0	0	0	0	0	0	0	0	0	0	0	0	0	0	0	0	0	0	0	0	0	0	0	0	0	0	0	0	0	0	0
chr1_226983552_226983854_+	ENSG00000163050.16	ADCK3	chr1	226983552	226983854	+	ENST00000366779.5	14	15	0	0	0	0	0	0	0	0	0	0	0	0	0	0	0	0	0	0	0	0	0	0	0	0	0	0	0	0	0	0	0	0.298654	1.34826	0	0	0	0	0	0	0
chr1_167893853_167896691_-	ENSG00000143199.17	ADCY10	chr1	167893853	167896691	-	ENST00000367851.8	8	7	0	0	0	0	0	0	0	0	0	0	0	0	0	0	0	0	0.273746	0	0	0	0	0	0	0	0	0	0	0	0	0	0	0	0	0	0	0	0	0	0	0
chr1_167883437_167903991_-	ENSG00000143199.17	ADCY10	chr1	167883437	167903991	-	ENST00000367851.8	9	3	0	0	0	0	0	0	0	0	0	0	0	0	0	0	0	0	0	0	0	0	0	0	0	0	0	0	0	0	0	0	0	0	0	0	0	0	0	0	0.359576	0
chr1_167883437_167896691_-	ENSG00000143199.17	ADCY10	chr1	167883437	167896691	-	ENST00000367851.8	9	7	0	0	0	0	0	0	0	0	0	0	0	0	0	0	0	0	0	0	0	0	0	0	0.331496	0	0	0	0	0	0	0	0	0	0	0	0	0	0	0	0	0
chr1_167875131_167905198_-	ENSG00000143199.17	ADCY10	chr1	167875131	167905198	-	ENST00000367851.8	13	2	0	0	0	0	0	0	0	0	0	0	0	0	0	0	0	0	0	0	0	0	0	0	0	0	0	0	0	0	0	0	0	0	0	0	0	0	0	0	0	0
chr1_167854353_167856439_-	ENSG00000143199.17	ADCY10	chr1	167854353	167856439	-	ENST00000367851.8	18	17	0	0	0	0	0	0	0	0	0	0	0	0	0	0	0	0	0	0.422015	0	0	0	0	0	0	0	0	0	0	0	0	0	0	0	0	0	0	0	0	0	0
chr1_167818072_167818412_-	ENSG00000143199.17	ADCY10	chr1	167818072	167818412	-	ENST00000485964.5	13	12	0	0	0	0	0	0	0	0	0	0	0	0	0	0	0	0	0	0	0	0	0	0	0	0	0	0	0	0	0	0	0	0	0	0	0	0	0	0	0	0
chr1_31741373_31742217_-	ENSG00000121753.12	ADGRB2	chr1	31741373	31742217	-	ENST00000373655.6	11	8	0	0	0	0	0	0	0	0	0	0	0	0	0	0	0	0	0.273746	0	0	0	0	0	0	0	0	0	0	0	0	0	0	0	0	0	0	0	0	0	0	0
chr1_31737652_31738326_-	ENSG00000121753.12	ADGRB2	chr1	31737652	31738326	-	ENST00000373655.6	19	18	0	0	0	0	0	0	0	0	0	0	0	0	0	0	0	0	0	0	0.291262	0	0	0	0	0	0	0	0	0	0	0	0	0	0	0	0	0	0	0	0	0
chr1_31737429_31740541_-	ENSG00000121753.12	ADGRB2	chr1	31737429	31740541	-	ENST00000373655.6	20	12	0	0	0	0	0	0	0	0	0	0	0	0	0	0	0	0	0	0	0	0	0.234719	0	0	0	0	0	0	0	0	0.229511	0	0	0	0	0	0	0	0	0	0
chr1_31732115_31757281_-	ENSG00000121753.12	ADGRB2	chr1	31732115	31757281	-	ENST00000373655.6	28	3	0	0	0	0	0	0	0	0	0	0	0	0	0	0	0	0	0	0	0	0	0	0	0	0	0	0	0	0	0	0	0	0	0	0	0	0	0	0	0	0
chr1_31732115_31756815_-	ENSG00000121753.12	ADGRB2	chr1	31732115	31756815	-	ENST00000373655.6	28	4	0	0	0	0	0	0	0	0	0	0	0	0	0	0	0	0	0	0	0	0	0	0	0	0	0	0	0	0	0	0	0	0	0	0	0	0	0	0.33668	0	0
chr1_81836885_81837057_+	ENSG00000117114.19	ADGRL2	chr1	81836885	81837057	+	ENST00000370725.5	5	5	0	0	0	0	0.448354	0.256886	0	0	0	0	0.754819	0	0	0	0	0	0	0	0.228832	0	0.234719	0	0	0.292128	2.44323	0	0	0	0	0.561233	0	0.597308	0	0	0	0	0	1.21125	0.719152	0
chr1_81836885_81907230_+	ENSG00000117114.19	ADGRL2	chr1	81836885	81907230	+	ENST00000370725.5	5	6	0	0	0.326655	0	3.12728	0.435243	0	0	0	0	0	0	0.620102	0	0	0.291251	0	0	2.65205	0	3.59512	0.187335	0	2.57272	2.55243	0	0	0	0	0.500492	0	0	0.269653	0.680851	0.27011	0.710375	0	1.95879	0.688377	0
chr1_81836885_81936837_+	ENSG00000117114.19	ADGRL2	chr1	81836885	81936837	+	ENST00000370725.5	5	7	0	0	0	0	0	0	0	0	0	0	0	0	0	0	0	0	0	0	0	0	0	0	0	0	0	0	0	0	0	0	0	0	0	0	0	0	0	0.183442	0	0
chr1_81836885_81943769_+	ENSG00000117114.19	ADGRL2	chr1	81836885	81943769	+	ENST00000370725.5	5	8	0	0	0	0	0.401187	0	0	0	0	0	0	0	0	0	0	0	0	0	0	0	0	0	0	0	0	0	0	0	0	0	0	0	0	0	0	0	0	0	0	0
chr1_81836885_81951121_+	ENSG00000117114.19	ADGRL2	chr1	81836885	81951121	+	ENST00000370725.5	5	10	0	0	0	0	0	0	0	0	0	0	0	0	0	0	0	0	0	0	0	0	0	0	0	0	0	0	0	0	0	0	0	0	0	0	0	0	0	0	0.359576	0
chr1_81836885_81956060_+	ENSG00000117114.19	ADGRL2	chr1	81836885	81956060	+	ENST00000370725.5	5	13	0	0	0	0	0.311608	0.256886	0	0	0	0	0	0	0	0	0	0	0	0	1.42186	0	0	0	0	0	0	0	0	0	0	0	0	0	0	0	0	0	0	0	0	0
chr1_81907017_81907230_+	ENSG00000117114.19	ADGRL2	chr1	81907017	81907230	+	ENST00000370725.5	6	6	0	0	0	0	0	0	0	0	0	0	0	0	0	0	0.316699	0	0	0	0	0	0	0	0	0	0	0	0	0	0	0.250246	0	0	0	0	0	0	0	0	0	0
chr1_81907017_81943769_+	ENSG00000117114.19	ADGRL2	chr1	81907017	81943769	+	ENST00000370725.5	6	8	0	0	0	0	0	0.388474	0	0	0	0	0	0	0	0	0	0	0	0	0	0	0	0	0	0	0	0	0	0	0	0	0	0.298654	0	0	0	0	0	0	0	0
chr1_81907017_81952142_+	ENSG00000117114.19	ADGRL2	chr1	81907017	81952142	+	ENST00000370725.5	6	11	0	0	0	0	0.224177	0	0	0	0	0	0	0	0	0	0	0	0	0	0	0	0	0	0	0	0	0	0	0	0	0	0	0	0	0	0	0	0	0	0	0
chr1_81907017_81956060_+	ENSG00000117114.19	ADGRL2	chr1	81907017	81956060	+	ENST00000370725.5	6	13	0	0	0	0	0	0	0	0	0	0	0	0.318948	0	0	0	0	0	0	0.228832	0	0	0	0	0	0	0	0	0.706337	0	0	0	0	0	0	0	0.216034	0	0	0	0
chr1_81936728_81943769_+	ENSG00000117114.19	ADGRL2	chr1	81936728	81943769	+	ENST00000370725.5	7	8	0	0	0	0	0	0.217621	0	0	0	0	0	0	0.620102	0	0	0	0	0	0	0	0	0	0	0	0.583509	0	0	0	0	0.750738	0	0	0	0	0	0	0	0	0	0
chr1_81936728_81956060_+	ENSG00000117114.19	ADGRL2	chr1	81936728	81956060	+	ENST00000370725.5	7	13	0	0	0	0	0	0	0	0	0	0	0.400444	0	0	0	0	0	0	0	0.228832	0	0	0	0	0	0	0	0	0.3276	0	1.34234	0	0	0	0	0	0	0.292743	0	0	0
chr1_81936728_81971918_+	ENSG00000117114.19	ADGRL2	chr1	81936728	81971918	+	ENST00000370725.5	7	19	0	0	0	0	0	0	0	0	0	0	0	0	0	0	0	0	0	0	0	0	0	0	0	0	0	0	0	0	0	0	0	0	0	0	0	0	0.267418	0	0.344189	0
chr1_81936728_81985355_+	ENSG00000117114.19	ADGRL2	chr1	81936728	81985355	+	ENST00000370725.5	7	24	0	0	0	0	0.224177	0	0	0	0	0	0	0	0	0	0	0	0	0	0	0	0	0	0	0	0	0	0	0	0	0	0	0	0	0	0	0	0	0	0	0
chr1_81942969_81952142_+	ENSG00000117114.19	ADGRL2	chr1	81942969	81952142	+	ENST00000370725.5	8	11	0	0	0.988682	0	0	0	0	0	0	0	0	0	0	0	0	0	0	0	0	0	0	0	0	0	1.16702	0	0	0	0	0	0	0	0	0	0	0	0	0.183442	0	0
chr1_81942969_81956060_+	ENSG00000117114.19	ADGRL2	chr1	81942969	81956060	+	ENST00000370725.5	8	13	0	0	0	0	0	0	0	0	0	0	0	0	0	0	0	0	0.547492	0	0.228832	0	0	0	0	0	0	0	0	0	0	0	0	0	0	0	0	0	0	0.183442	0.344189	0
chr1_81942969_81971918_+	ENSG00000117114.19	ADGRL2	chr1	81942969	81971918	+	ENST00000370725.5	8	19	0	0	0	0	0	0	0	0	0	0	0	0	0	0	0	0	0	0	0.582524	0	0	0	0	0	0.692705	0	0	0	0	0	0	0	0	0	0	0	0	0	0	0
chr1_81942969_81985355_+	ENSG00000117114.19	ADGRL2	chr1	81942969	81985355	+	ENST00000370725.5	8	24	0	0	0	0	0	0	0	0	0	0	0	0	0	0	0	0	0	0	0.228832	0	0	0	0	0	0	0	0	0	0	0	0	0	0	0	0	0	0	0	0	0
chr1_81950189_81952142_+	ENSG00000117114.19	ADGRL2	chr1	81950189	81952142	+	ENST00000370725.5	9	11	0	0	0	0	0	0	0	0	0	0	0	0	0	0	0	0	0	0	0	0	0	0	0	0	0	0	0	0	0	0.250246	0	0	0	0	0	0	0	0	0	0
chr1_81950189_81956060_+	ENSG00000117114.19	ADGRL2	chr1	81950189	81956060	+	ENST00000370725.5	9	13	0	0	0	0	0.984138	0.770659	0	0	0	0	0.860867	0	0	0	0	0.291251	0	0	0.972333	0	0.262044	0	0	0.292128	0.692705	0	0	0	0	0.500492	0	0	0	0	0	0	0	0	0	0
chr1_81950189_81966609_+	ENSG00000117114.19	ADGRL2	chr1	81950189	81966609	+	ENST00000370725.5	9	15	0	0	0	0	0.311608	0	0	0	0	0	0	0	0	0	0	0	0	0	0	0	0	0	0	0	0	0	0	0	0	0	0	0	0	0	0	0	0	0	0	0
chr1_81950189_81971918_+	ENSG00000117114.19	ADGRL2	chr1	81950189	81971918	+	ENST00000370725.5	9	19	0	0	0.406021	0	0	0	0	0	0	0	0	0	0	0	0	0	0	0	0.582524	0	0	0	0	0	0	0	0	0	0	0.459022	0	0	0	0	0	0	0.292743	0.366884	0	0
chr1_81951018_81952142_+	ENSG00000117114.19	ADGRL2	chr1	81951018	81952142	+	ENST00000370725.5	10	11	0	0	0	0	0	0	0	0	0	0	0	0	0	0	0	0	0	0	0	0	0	0	0	0	0	0	0	0	0	0	0	0	0	0	0	0	0	0	0	0
chr1_81951018_81956060_+	ENSG00000117114.19	ADGRL2	chr1	81951018	81956060	+	ENST00000370725.5	10	13	0	0	0	0	0	0	0	0	0	0	0	0	0	0	0	0	0	0	0	0	0	0	0	0	0	0	0	0	0	0	0	0	0	0	0	0	0	0.16834	0	0
chr1_81951957_81956060_+	ENSG00000117114.19	ADGRL2	chr1	81951957	81956060	+	ENST00000370725.5	11	13	0	0	0	0	0	0	0	0	0	0	0	0	0	0	0	0	0	0	0	0	0	0	0	0	0.583509	0	0	0	0	0	0	0	0	0	0	0	0	0	0	0
chr1_81955877_81956060_+	ENSG00000117114.19	ADGRL2	chr1	81955877	81956060	+	ENST00000370725.5	13	13	0	0	0	0	0	0	0	0	0	0	0	0	0	0	0	0	0	0	0	0	0	0	0	0	0	0	0	0	0	0	0	0	0	0	0	0	0	0	0.344189	0
chr1_81955877_81985355_+	ENSG00000117114.19	ADGRL2	chr1	81955877	81985355	+	ENST00000370725.5	13	24	0	0	0	0	0	0	0	0	0	0	0	0	0	0	0	0	0	0	0	0	0	0	0	0	0	0	0	0	0	0	0	0	0	0	0	0	0	0	0	0
chr1_81966058_81971918_+	ENSG00000117114.19	ADGRL2	chr1	81966058	81971918	+	ENST00000370725.5	14	19	0	0	0	0	0	0	0	0	0	0	0	0	0	0	0	0	0.263939	0	0.520094	0	0	0	0	0	0	0	0	0	0	0	0	0	0	0	0	0	0	0	0	0
chr1_81966058_81979960_+	ENSG00000117114.19	ADGRL2	chr1	81966058	81979960	+	ENST00000370725.5	14	20	0	0	0	0	0	0	0	0	0	0	0	0	0	0	0.241586	0	0	0	0	0	0	0	0	0	0	0	0	0	0	0	0	0.298654	0	0	0	0	0	0	0	0
chr1_81966058_81981976_+	ENSG00000117114.19	ADGRL2	chr1	81966058	81981976	+	ENST00000370725.5	14	22	0	0	0	0	0	0	0	0	0	0	0	0	0	0	0	0	0	0	0	0	0	0	0	0	0	0	0	0	0	0	0	0	0	0	0	0	0	0	0	0
chr1_81966058_81985355_+	ENSG00000117114.19	ADGRL2	chr1	81966058	81985355	+	ENST00000370725.5	14	24	0	0	0	0	0	0.388474	0	0	0	0	0.503213	0	0	0	0	0	0	0	0.582524	0	0.262044	0	0.276394	0	0	0	0	0	0	0.229511	0	0	0	0	0.239396	0.216034	0	0	0	0
chr1_81966404_81968199_+	ENSG00000117114.19	ADGRL2	chr1	81966404	81968199	+	ENST00000370725.5	15	16	0	0	0	0	0	0	0	0	0	0	0	0	0	0	0	0	0	0	0	0	0	0	0	0	0	0	0	0	0	0	0	0	0	0	0	0.355187	0	0	0	0
chr1_81966404_81981976_+	ENSG00000117114.19	ADGRL2	chr1	81966404	81981976	+	ENST00000370725.5	15	22	0	0	0	0	0	0	0	0	0	0	0	0	0	0	0	0	0	0	0	0	0	0	0	0	0	0	0	0	0	0	0	0	0	0	0	0	0.585486	0	0	0
chr1_81968026_81971918_+	ENSG00000117114.19	ADGRL2	chr1	81968026	81971918	+	ENST00000370725.5	16	19	0	0	0	0	0	0	0	0	0	0	0.400444	0	0	0	0	0	0	0	0.22612	0	0	0	0	0.292128	0	0	0	0	0	0	0	0	0	0	0	0	0	0	0	0
chr1_81969178_81971918_+	ENSG00000117114.19	ADGRL2	chr1	81969178	81971918	+	ENST00000370725.5	17	19	0	0	0	0	0	0	0	0	0	0	0	0	0	0	0	0	0	0	0	0	0	0	0	0	0	0	0	0	0	0	0	0	0	0	0	0	0	0.16834	0	0
chr1_81984583_81987029_+	ENSG00000117114.19	ADGRL2	chr1	81984583	81987029	+	ENST00000370725.5	23	25	0	0	0	0	0	0	0	0	0	0	0	0	0	0	0	0	0	0	0	0	0	0	0	0	0	0	0	0	0	0	0	0	0	0	0	0	0.267418	0	0	0
chr1_202943758_202951164_-	ENSG00000159346.12	ADIPOR1	chr1	202943758	202951164	-	ENST00000340990.9	6	2	0	0	0	0	0	0	0	0	0	0	0	0	0	0	0	0	0	0	0	0	0	0	0	0	0	0	0	0	0	0	0	0	0	0	0	0	0	0	0	0
chr1_202942025_202945169_-	ENSG00000159346.12	ADIPOR1	chr1	202942025	202945169	-	ENST00000340990.9	7	5	0	0	0	0	0	0	0	0	0	0	0.286956	0	0	0	0	0	0	0	0	0	0	0	0	0	0	0	0	0	0	0	0	0	0	0	0	0	0	0	0	0
chr1_202950930_202954307_-	ENSG00000159346.12	ADIPOR1	chr1	202950930	202954307	-	ENST00000417068.5	3	2	0	0	0.494341	0	0	0.217621	0	0	0	0	0	0	0	0	0	0	0	0	0.228832	0.228857	0	0	0	0	0	0	0	0	0	0	0	0	0	0	0	0	0	0	0	0
chr1_202948304_202954307_-	ENSG00000159346.12	ADIPOR1	chr1	202948304	202954307	-	ENST00000417068.5	4	2	0	0	0	0	0	0	0	0	0	0	0	0	0	0	0	0	0	0	0	0	0	0	0	0	0	0	0	0	0	0	0	0	0	0	0	0	0	0	0	0
chr1_36091244_36092522_+	ENSG00000116863.10	ADPRHL2	chr1	36091244	36092522	+	ENST00000373178.4	2	5	0	0	0	0	0	0	0	0	0	0	0	0	0	0	0	0	0	0	0	0	0	0	0	0	0	0	0	0	0	0	0	0	0	0	0	0	0	0	0.911687	0
chr1_36091618_36091825_+	ENSG00000116863.10	ADPRHL2	chr1	36091618	36091825	+	ENST00000373178.4	3	3	0	0	0	0	0	0	0	0	0	0	0	0	0	0	0	0	0	0	0	0	0	0	0	0	0	0	0.496832	0	0	0	0	0	0	0	0	0	0	0	0	0
chr1_36091618_36092094_+	ENSG00000116863.10	ADPRHL2	chr1	36091618	36092094	+	ENST00000373178.4	3	4	0	0	0	0	0	0	0	0	0	0	0	0	0	0	0	0	0	0	0	0	0	0	0	0	0	0	0	0	0	0	0	0	0	0	0	0	0	0	0	0
chr1_36091618_36092522_+	ENSG00000116863.10	ADPRHL2	chr1	36091618	36092522	+	ENST00000373178.4	3	5	0	0	0	0	0	0	0	0	0	0	0	0	1.03778	0	0	0	0	0	0	0	0	0	0	0	0	0	0	0	0	0	0	0	0	0	0	0	0	0	0	0
chr1_244432545_244437768_-	ENSG00000035687.9	ADSS	chr1	244432545	244437768	-	ENST00000366535.3	4	2	0	0	0	0	0	0	0	0	0	0	0	0	0	0	0	0	0	0	0	0	0	0.170444	0	0	0	0	0	0	0	0	0	0	0	0	0	0	0	0	0	0
chr1_244423953_244437768_-	ENSG00000035687.9	ADSS	chr1	244423953	244437768	-	ENST00000366535.3	6	2	0	0	0	0	0	0.435243	0	0	0	0	0	0	0	0	0	0	0	0	0	0	0	0	0	0	0	0	0	0	0	0	0	0	0	0	0	0.355187	0	0.183442	0	0
chr1_244423953_244424387_-	ENSG00000035687.9	ADSS	chr1	244423953	244424387	-	ENST00000366535.3	6	5	0	0	0	0	0	0	0	0	0	0	0	0	0	0	0	0	0	0	0	0	0	0	0	0	0	0	0	0.176584	0	0	0	0	0	0.261939	0	0	0	0	0	0
chr1_244422835_244437768_-	ENSG00000035687.9	ADSS	chr1	244422835	244437768	-	ENST00000366535.3	7	2	0	0	0	0	0	0	0	0	0	0	0	0	0	0	0	0	0	0	0	0.228857	0	0	0	0	0	0	0	0	0	0	0	0	0	0	0	0	0	0	0	0
chr1_244422835_244432595_-	ENSG00000035687.9	ADSS	chr1	244422835	244432595	-	ENST00000366535.3	7	4	0	0	0	0	0	0	0	0	0.801166	0	0	0	0	0	0	0	0	0	0	0	0	0	0	0	0	0	0	0	0	0	0	0	0	0	0	0	0	0	0	0
chr1_244422835_244424387_-	ENSG00000035687.9	ADSS	chr1	244422835	244424387	-	ENST00000366535.3	7	5	0	0	0	0	0	0	0	0	0	0.547384	0	0	0	0	0.241586	0	0	0	0	0	0	0.434032	0	0	0	0	0	0	0	0.280616	0	0	0.269653	0	0	0	0	0.338014	0.344189	0
chr1_244418760_244432595_-	ENSG00000035687.9	ADSS	chr1	244418760	244432595	-	ENST00000366535.3	9	4	0	0	0	0	0	0	0	0	0	0	0	0	0	0	0	0	0	0	0	0	0	0	0	0	0	0	0	0	0	0	0	0	0	0	0.239396	0	0	0	0	0
chr1_244418760_244424387_-	ENSG00000035687.9	ADSS	chr1	244418760	244424387	-	ENST00000366535.3	9	5	0	0	0	0	0	0	0	0	0	0	0	0.318948	0	0	0	0	0	0.620888	0	0	0	0	0	0	0	0	0	0	0	0	0	0	0.269653	0	1.02961	0.227166	0	0	0	1.77895
chr1_244418760_244420296_-	ENSG00000035687.9	ADSS	chr1	244418760	244420296	-	ENST00000366535.3	9	8	0	0.406923	0.494341	0	0.401187	0	0	0	0.267055	0	0	0	0.345927	0	0	0.302829	0	0	0.520094	0	0	0	0.331496	0	0	0	0	0.176584	0	0.459022	0	0	0.677776	0	0	0	0	0	0.344189	0
chr1_244417628_244437768_-	ENSG00000035687.9	ADSS	chr1	244417628	244437768	-	ENST00000366535.3	10	2	0	0	0	0	0	0	0	0	0	0	0	0	0	0	0	0	0	0	0	0	0	0	0	0	0	0	0	0	0	0	0	0	0	0	0	0	0	0	0	0
chr1_244417628_244424387_-	ENSG00000035687.9	ADSS	chr1	244417628	244424387	-	ENST00000366535.3	10	5	0	0	0	0	0	0	0	0	0	0	0	0	0	0	0	0	0	0	0	0	0.234719	0	0	0.292128	0	0	0	0.176584	0	0	0	0	0	0	0	0	0	0	0	0
chr1_244417628_244420296_-	ENSG00000035687.9	ADSS	chr1	244417628	244420296	-	ENST00000366535.3	10	8	0	0	0	0	0	0	0	0	0	0	0	0	0	0	0	0	0	0	0	0	0	0	0	0	0	0	0	0	0	0	0	0	0	0	0	0	0	0	0	0
chr1_244417628_244417752_-	ENSG00000035687.9	ADSS	chr1	244417628	244417752	-	ENST00000366535.3	10	10	0	0	0	0	0	0	0	0	0	0	0	0	0	0	0	0	0	0	0	0	0	0	0	0.292128	0	0	0	0	0	0	0	0	0	0	0	0	0	0	0	0
chr1_244415981_244424387_-	ENSG00000035687.9	ADSS	chr1	244415981	244424387	-	ENST00000366535.3	11	5	0	0	0	0	0.224177	0.217621	0	0	0	0	0.286956	0.559888	0	0	0	0	0	0	0	0	0	0.170444	0	0.424084	0	0	0	0.353169	0	0	0	0	0	0	0	0	0	0.50502	0.703765	0.506118
chr1_244411287_244437768_-	ENSG00000035687.9	ADSS	chr1	244411287	244437768	-	ENST00000366535.3	12	2	0	0	0	0	0.224177	0.217621	0	0	0	0	0	0	0	0	0	0	0	0	0	0	0	0	0	0	0	0	0	0	0.297656	0	0.838668	0	0	0	0	0	0.447303	0.351782	0	0
chr1_244411287_244424387_-	ENSG00000035687.9	ADSS	chr1	244411287	244424387	-	ENST00000366535.3	12	5	0	0	0	0	0.311608	0	0	0	0	0	0	0	0	0	0	0	0	0	0	0	0	0.187335	0	0	0	0	0	0	0	0	0.279556	0	0	0	0	0	0	0	0	0
chr1_244411287_244422916_-	ENSG00000035687.9	ADSS	chr1	244411287	244422916	-	ENST00000366535.3	12	7	0	0	0	0	0	0	0	0	0	0	0	0	0	0	0	0	0	0	0	0	0	0	0	0	0	0	0	0	0	0	0	0	0	0	0	0	0	0.16834	0	0
chr1_244411287_244417752_-	ENSG00000035687.9	ADSS	chr1	244411287	244417752	-	ENST00000366535.3	12	10	0	0	0	0	0	0	0	0	0	0	0	0	0	0	0	0	0	0	0	0	0	0.545114	0.587232	0	0	0	0	0.26688	0	0	0	0	0	0.188509	0	0	0	0.33668	0	0
chr1_244411287_244416078_-	ENSG00000035687.9	ADSS	chr1	244411287	244416078	-	ENST00000366535.3	12	11	0	0	0	0	0	0.256886	0	0	0	0	0	0	0	0	0	0	0	0	0	0	0	0	0	0	0	0	0	0	0	0	0	0.252936	0	0	0	0	0	0	0	0
chr1_49851396_49851518_-	ENSG00000186094.16	AGBL4	chr1	49851396	49851518	-	ENST00000371839.5	2	2	0	0	0	0	0	0	0	0	0	0	0	0	0	0	0	0	0	0	0	0	0	0	0	0	0	0	0	0	0	0	0	0	0	0	0	0.227166	0	0	0	0
chr1_49697313_49851518_-	ENSG00000186094.16	AGBL4	chr1	49697313	49851518	-	ENST00000371839.5	3	2	0	0	0	0	0	0	0	0	0	0	0	0	0	0	0	0	0	0	0	0	0	0	0	0	0	0	0	0.533761	0	0	0	0	0	0	0	0	0	0	0	0
chr1_99864386_99877828_+	ENSG00000162688.16	AGL	chr1	99864386	99877828	+	ENST00000361915.7	5	12	0	0	0	0	0.311608	0	0	0	0	0	0	0.637895	0	0	0	0	0.263939	0	0	0	0.234719	0	0	0	0	0	0	0.3276	0	0	0	0	0	0	0	0	0	0.16834	0	0
chr1_99864386_99881691_+	ENSG00000162688.16	AGL	chr1	99864386	99881691	+	ENST00000361915.7	5	17	0	0	0	0	0	0	0	0	0	0	0	0	0	0	0	0	0	0	0	0	0	0	0	0	0	0	0	0	0	0	0	0	0	0	0	0	0	0	0	0
chr1_99870400_99877828_+	ENSG00000162688.16	AGL	chr1	99870400	99877828	+	ENST00000361915.7	6	12	0	0	0	0.673104	0	0.217621	0	0	0.548928	0	0	0	0	0	0.483172	0	0	0.422015	2.01252	0.228857	0.262044	0	0	0	0	0	0	0	0	0.250246	0	0	0	0.340425	0	0	0.292743	0.16834	0	0.364473
chr1_99870400_99881691_+	ENSG00000162688.16	AGL	chr1	99870400	99881691	+	ENST00000361915.7	6	17	0	0	0	0	0	0	0	0.414318	0.267055	0	0	0	0.691854	0.336626	0	0	0.527878	0	0.291262	0	0	0.187335	0.863627	0.292128	0	0.755471	0	0	0	0.280616	0	0	0	0	0	0.648101	0	0	0	0
chr1_99870400_99913738_+	ENSG00000162688.16	AGL	chr1	99870400	99913738	+	ENST00000361915.7	6	30	0	0.406923	0	0	0	0	0	0	0	0	0	0	0	0	0	0	0	0	0.291262	0	0	0	0	0	0	0	0	0	0	0	0	0	0	0	0	0	0	0	0	0
chr1_99870758_99877828_+	ENSG00000162688.16	AGL	chr1	99870758	99877828	+	ENST00000361915.7	7	12	0	0	0	0	0	0	0	0	0	0	0	0	0	0	0	0	0	0	0	0	0	0	0	0	0	0	0	0	0	0	0	0	0	0.188509	0	0	0	0	0	0
chr1_99874687_99877828_+	ENSG00000162688.16	AGL	chr1	99874687	99877828	+	ENST00000361915.7	8	12	0	0	0	0	0	0	0	0	0	0	0	0	0	0	0	0	0	0	0	0	0	0	0	0	0	0	0	0	0	0	0	0	0	0	0	0.216034	0	0	0	0
chr1_99874687_99881691_+	ENSG00000162688.16	AGL	chr1	99874687	99881691	+	ENST00000361915.7	8	17	0	0	0	0	0	0	0	0	0	0	0	0	0	0	0.316699	0	0	0	0	0	0	0	0	0	0	0	0	0	0	0	0	0	0	0	0	0	0	0	0	0
chr1_99874687_99884703_+	ENSG00000162688.16	AGL	chr1	99874687	99884703	+	ENST00000361915.7	8	20	0	0	0	0	0	0	0	0	0	0	0	0	0	0	0	0	0	0	0.22612	0	0	0	0	0	0	0	0	0	0	0	0	0	0	0	0	0	0	0	0	0
chr1_99876458_99877828_+	ENSG00000162688.16	AGL	chr1	99876458	99877828	+	ENST00000361915.7	11	12	0.483388	0	0	0	0	0	0	0	0	0	0.400444	0	0	0	0	0	0.263939	0	0	0	0	0	0	0	0	0	0	0	0	0.250246	0	0	0	0	0	0	0	0	0.719152	0
chr1_99876458_99881691_+	ENSG00000162688.16	AGL	chr1	99876458	99881691	+	ENST00000361915.7	11	17	0	0	0	0	0	0	0	0	0	0	0	0	0	0	0	0	0	0	0	0	0	0	0	0	0	0.468839	0	0	0	0.250246	0	0	0	0	0	0	0	0	0	0
chr1_99876458_99913738_+	ENSG00000162688.16	AGL	chr1	99876458	99913738	+	ENST00000361915.7	11	30	0	0	0	0	0	0	0	0	0	0	0	0	0	0	0	0	0	0	0	0	0	0	0	0	0	0	0	0	0	0	0	0	0	0	0	0.454332	0	0	0	0
chr1_99877641_99881177_+	ENSG00000162688.16	AGL	chr1	99877641	99881177	+	ENST00000361915.7	12	15	0	0	0	0	0	0	0	0	0	0	0	0	0	0.187263	0	0	0	0	0	0	0	0	0	0	0	0	0	0	0	0	0	0	0	0	0	0	0	0	0	0
chr1_99877641_99884703_+	ENSG00000162688.16	AGL	chr1	99877641	99884703	+	ENST00000361915.7	12	20	0	0	0	0	0	0	0	0	0	0	0	0	0	0	0	0	0	0	0	0	0	0	0	0	0	0	0	0	0	0	0	0	0	0	0	0	0	0	0	0
chr1_99879923_99896388_+	ENSG00000162688.16	AGL	chr1	99879923	99896388	+	ENST00000361915.7	13	25	0	0	0	0	0	0	0	0	0	0	0	0	0	0	0.241586	0	0	0	0	0	0	0	0	0	0	0	0	0	0	0	0	0	0	0	0	0	0	0	0	0
chr1_99880632_99892607_+	ENSG00000162688.16	AGL	chr1	99880632	99892607	+	ENST00000361915.7	14	24	0	0	0	0	0	0	0	0	0	0	0	0	0	0	0	0	0	0	0	0	0	0	0	0	0	0	0	0	0	0	0	0	0	0	0	0	0	0	0	0
chr1_99884339_99884703_+	ENSG00000162688.16	AGL	chr1	99884339	99884703	+	ENST00000361915.7	19	20	0	0	0	0	0	0	0	0	0	0	0	0	0	0	0	0	0	0	0	0	0	0.170444	0	0	0	0	0	0	0	0	0	0	0	0	0	0	0	0	0	0
chr1_99887978_99892607_+	ENSG00000162688.16	AGL	chr1	99887978	99892607	+	ENST00000361915.7	21	24	0	0	0	0	0	0	0	0	0	0	0	0	0	0	0	0	0	0	0	0	0	0	0.331496	0	0	0	0	0	0	0	0	0	0	0	0	0	0	0	0	0
chr1_99900636_99913738_+	ENSG00000162688.16	AGL	chr1	99900636	99913738	+	ENST00000361915.7	26	30	0	0	0	0	0	0	0	0	0	0	0	0	0	0	0	0	0	0	0	0	0	0	0	0	0	0	0	0	0	0	0	0	0	0	0	0	0	0	0.688377	0
chr1_99910712_99915486_+	ENSG00000162688.16	AGL	chr1	99910712	99915486	+	ENST00000361915.7	28	31	0	0	0	0	0	0	0	0	0	0	0	0	0	0	0	0	0	0	0	0	0	0	0	0	0	0	0	0	0	0	0	0	0	0	0	0	0	0	0	0
chr1_99910712_99916731_+	ENSG00000162688.16	AGL	chr1	99910712	99916731	+	ENST00000361915.7	28	33	0	0	0	0	0	0	0	0	0	0	0	0	0	0	0.241586	0	0	0	0.457664	0	0	0	0	0	0	0	0	0	0	0	0	0	0	0	0	0	0	0	0	0
chr1_99913527_99916731_+	ENSG00000162688.16	AGL	chr1	99913527	99916731	+	ENST00000361915.7	30	33	0	0	0	0	0	0	0	0	0	0	0	0	0	0	0	0	0	0	0	0	0	0	0	0	0	0	0	0	0	0	0	0	0	0	0	0	0	0	0.344189	0
chr1_99915389_99916731_+	ENSG00000162688.16	AGL	chr1	99915389	99916731	+	ENST00000361915.7	31	33	0	0	0	0	0	0	0	0	0	0	0	0	0	0	0	0	0	0	0	0	0	0	0	0	0	0	0	0	0	0	0	0	0	0	0	0	0	0	0	0
chr1_15577685_15580142_-	ENSG00000116771.5	AGMAT	chr1	15577685	15580142	-	ENST00000375826.3	5	3	0	0	0	0	0	0	0	0	0.267055	0	0	0	0	0	0	0	0	0	0	0	0	0	0	0	0	0	0	0	0.297656	0	0	0	0	0	0	0	0	0	0	0
chr1_35888427_35894402_+	ENSG00000092847.11	AGO1	chr1	35888427	35894402	+	ENST00000373206.5	2	7	0	0	0	0	0	0	0	0	0	0	0	0	0	0	0	0	0	0.620888	0	0	0	0	0	0	0	0	0	0	0	0	0	0	0	0	0	0	0	0	0	0
chr1_35888427_35895269_+	ENSG00000092847.11	AGO1	chr1	35888427	35895269	+	ENST00000373206.5	2	8	0	0	0	0	0	0	0	0	0	0	0.825518	0	0	0	0	0	0	0	0	0	0	0	0	0	0	0	0	0	0	0	0	0	0	0	0	0	0	0	0	0
chr1_35888427_35902337_+	ENSG00000092847.11	AGO1	chr1	35888427	35902337	+	ENST00000373206.5	2	11	0	0	0	0	0	0	0	0	0	0	0	0	0	0.186709	0	0	0	0	0	0	0	0	0	0	0	0	0.298068	0	0	0	0	0	0	0	0	0	0	0	0	0
chr1_35888427_35917727_+	ENSG00000092847.11	AGO1	chr1	35888427	35917727	+	ENST00000373206.5	2	16	0	0	0	0	0	0	0	0	0	0	0	0	0	0	0	0	0.263939	0	0	0	0	0	0	0	0	0	0	0	0	0	0	0	0	0	0	0	0	0	0	0
chr1_35892557_35895269_+	ENSG00000092847.11	AGO1	chr1	35892557	35895269	+	ENST00000373206.5	3	8	0	0	0	0	0	0	0	0	0	0	0	0	0	0	0	0	0	0	0.582524	0	0	0	0	0	0	0	0	0	0	0	0	0	0	0	0	0	0	0	0	0
chr1_35895122_35902337_+	ENSG00000092847.11	AGO1	chr1	35895122	35902337	+	ENST00000373206.5	8	11	0	0	0	0	0	0	0	0	0	0.547384	0	0	0	0	0	0	0	0	0	0	0	0	0	0	0	0	0	0	0	0	0	0	0	0	0	0	0	0	0	0
chr1_35901474_35902337_+	ENSG00000092847.11	AGO1	chr1	35901474	35902337	+	ENST00000373206.5	9	11	0	0	0	0	0.623215	0.606096	0	0	0.267055	0.581	0.400444	0	0	1.62741	0	0	0.273746	1.0429	0.582524	0	0.479282	0.246697	0	1.30047	0	0	0	0.353169	0.352232	0.229511	0	0	0	0	0.478793	0.216034	0	0	0	0
chr1_35901474_35907119_+	ENSG00000092847.11	AGO1	chr1	35901474	35907119	+	ENST00000373206.5	9	12	0	0	0	0	0	0	0	0	0	0	0.251606	0	0	0	0	0	0	0	0	0	0	0	0	0	0	0	0	0	0	0	0.547682	0	0	0	0	0	0	0	0	0
chr1_35901474_35915542_+	ENSG00000092847.11	AGO1	chr1	35901474	35915542	+	ENST00000373206.5	9	15	0	0	0	0	0	0.388474	0	0	0	0	0	0	0	0	0	0	0	0	0	0	0	0	0	0	0	0	0	0	0	0	0	0	0	0	0	0	0	0	0	0
chr1_35901948_35902337_+	ENSG00000092847.11	AGO1	chr1	35901948	35902337	+	ENST00000373206.5	10	11	0	0	0	0	0	0	0	0	0	0	0	0	0	0	0	0	0.35381	0	0.582524	0	0	0.170444	0	0	0	0	0	0.26688	0	0	0	0	0	0	0	0	0	0	0	0
chr1_35901948_35917727_+	ENSG00000092847.11	AGO1	chr1	35901948	35917727	+	ENST00000373206.5	10	16	0	0	0	0	0	0	0	0	0	0	0	0	0	0	0	0	0	0	0	0	0	0	0	0	0	0	0	0	0	0	0	0	0	0	0	0	0	0	0	0
chr1_35906935_35918423_+	ENSG00000092847.11	AGO1	chr1	35906935	35918423	+	ENST00000373206.5	12	17	0	0	0	0	0	0	0	0	0	0	0	0	0	0	0	0	0	0	0	0	0	0	0	0	0	0	0	0.26688	0	0.229511	0	0	0	0	0	0	0	0	0	0
chr1_35913842_35914274_+	ENSG00000092847.11	AGO1	chr1	35913842	35914274	+	ENST00000373206.5	13	14	0	0	0	0	0	0	0	0	0	0	0	0	0	0	0	0	0	0	0	0	0	0	0	0	0	0	0.297039	0	0	0	0	0	0.539305	0	0	0	0	0	0	0
chr1_35913842_35915542_+	ENSG00000092847.11	AGO1	chr1	35913842	35915542	+	ENST00000373206.5	13	15	0	0	0	0	0	0	0	0	0	0	0	0	0	0	0	0	0	0.84403	0	0	0.524088	0.170444	0	0	0	0	0	0	0	0	0	0	0	0	0	0	0	0	0	0
chr1_35913842_35918423_+	ENSG00000092847.11	AGO1	chr1	35913842	35918423	+	ENST00000373206.5	13	17	0	0	0	0	0	0	0	0	0	0	0	0	0	0	0	0	0	0	0	0	0	0	0	0	0	0	0.298068	0	0	0	0	0	0	0	0	0	0	0.338014	0	0
chr1_35917593_35919254_+	ENSG00000092847.11	AGO1	chr1	35917593	35919254	+	ENST00000373206.5	16	18	0	0	0	0	0	0	0	0	0	0	0	0	0	0	0	0	0	0	0	0	0	0.187335	0	0	0	0	0	0	0	0	0	0	0	0	0	0	0	0	0	0
chr1_35919055_35919254_+	ENSG00000092847.11	AGO1	chr1	35919055	35919254	+	ENST00000373206.5	18	18	0	0	0	0	0	0	0	0	0	0	0	0	0	0	0.316699	0	0	0	0	0	0	0	0	0	0	0	0	0	0	0	0	0	0	0	0	0	0	0	0	0
chr1_35931229_35973511_+	ENSG00000126070.19	AGO3	chr1	35931229	35973511	+	ENST00000324350.9	2	6	0	0	0	0	0	0	0	0	0	0	0	0	0	0	0	0	0	0	0	0	0	0	0	0	0	0	0	0	0	0	0	0	0	0	0	0.227166	0	0	0	0
chr1_35945692_35967075_+	ENSG00000126070.19	AGO3	chr1	35945692	35967075	+	ENST00000324350.9	3	4	0	0	0	0	0	0	0	0	0	0	0	0.24094	0	0	0	0	0	0	0	0	0	0	0	0	0	0	0	0	0	0	0	0	0	0	0	0	0	0	0	0
chr1_35966955_35972232_+	ENSG00000126070.19	AGO3	chr1	35966955	35972232	+	ENST00000324350.9	4	5	0	0	0	0	0	0	0	0	0	0	0	0	0	0	0	0	0	0	0	0	0	0.187335	0	0	0	0	0	0	0	0	0	0	0	0	0	0	0	0	0	0
chr1_35966955_35973511_+	ENSG00000126070.19	AGO3	chr1	35966955	35973511	+	ENST00000324350.9	4	6	0.263777	0	0	0.673104	0.224177	0	0.255961	0	0	0	0.286956	0.637895	0	0	0	0.635017	1.16524	1.42839	1.26088	0.78159	0.786132	0	0	0	1.27621	0.645973	0.892145	0.26688	0	0.280616	0.279556	0.298654	0.76523	0.785818	0	0.432068	1.91102	0.917209	3.1408	0
chr1_35966955_36014048_+	ENSG00000126070.19	AGO3	chr1	35966955	36014048	+	ENST00000373191.8	3	11	0	0	0	0	0	0	0	0	0	0	0	0	0	0	0	0	0	0	0	0	0	0	0	0	0	0	0	0	0	0	0	0	0	0	0	0	0	0.338014	0	0
chr1_35945692_35973511_+	ENSG00000126070.19	AGO3	chr1	35945692	35973511	+	ENST00000634486.1	2	4	0	0	0	0	0.401187	1.24517	0	0.414318	0.267055	0.581	0	0	0	0	0	0	0	0	0	0	0.262044	0.187335	0	0	0	0.468839	0.596137	0	0	0	0	0	0.269653	0	0	0.216034	0.292743	0	0.567498	0.364473
chr1_35945692_35984548_+	ENSG00000126070.19	AGO3	chr1	35945692	35984548	+	ENST00000634486.1	2	6	0	0	0	0	0	0	0	0	0	0	0	0	0	0	0	0	0	0	0	0	0	0	0	0	0	0	0	0	0	0	0	0	0.677776	0	0	0	0	0	0	0
chr1_35972024_35972232_+	ENSG00000126070.19	AGO3	chr1	35972024	35972232	+	ENST00000634486.1	3	3	0	0	0	0	0	0	0	0	0	0	0	0	0	0	0	0	0	0	0	0	0	0	0	0	0	0	0	0	0	0	0	0	0	0	0	0	0	0	0	0
chr1_35972024_35973511_+	ENSG00000126070.19	AGO3	chr1	35972024	35973511	+	ENST00000634486.1	3	4	0	0.343846	0.494341	0	0	0	0	0	0	0	0	0	0	0	0	0	0.627556	0.292181	0	0	0	0	0	0	0	0	0	0	0	0.280616	0	0	0	0	0.257402	0	1.61828	0	0.911687	0
chr1_35972024_35982712_+	ENSG00000126070.19	AGO3	chr1	35972024	35982712	+	ENST00000634486.1	3	5	0	0	0	0	0	0	0	0	0	0	0	0	0	0	0	0	0	0	0	0	0	0	0	0	0	0	0	0	0	0	0	0	0	0	0.239396	0	0	0	0	0
chr1_35972024_35984548_+	ENSG00000126070.19	AGO3	chr1	35972024	35984548	+	ENST00000634486.1	3	6	0	0	0	0	0.224177	0	0	0	0	0	0	0	0	0	0	0	0	0	0.22612	0	0	0	0	0	0	0	0	0	0	0	0	0	0	0	0	0	0	0	0.703765	0
chr1_35972024_36004475_+	ENSG00000126070.19	AGO3	chr1	35972024	36004475	+	ENST00000634486.1	3	7	0	0	0	0	0	0.217621	0	0	0	0	0	0	0	0	0	0	0	0	0	0	0	0	0	0	0	0	0	0	0	0	0	0	0	0	0	0	0	0	0	0
chr1_35972024_36009594_+	ENSG00000126070.19	AGO3	chr1	35972024	36009594	+	ENST00000634486.1	3	11	0	0	0	0	0	0	0	0	0	0	0	0	0	0	0	0	0	0	0.22612	0	0	0	0	0	0	0	0	0	0	0	0	0	0	0	0	0	0	0	0	0
chr1_35972024_36013752_+	ENSG00000126070.19	AGO3	chr1	35972024	36013752	+	ENST00000634486.1	3	12	0	0	0	0	0	0	0	0	0	0	0	0	0	0	0	0	0	0	0	0	0	0	0	0	0	0	0	0	0	0	0	0.298654	0	0	0	0	0	0	0	0
chr1_35972024_36014048_+	ENSG00000126070.19	AGO3	chr1	35972024	36014048	+	ENST00000634486.1	3	13	0	0	0	0	0	0	0	0	0	0	0	0	0	0	0	0	0	0	0	0	0.479282	0	0	0	0	0	0	0	0.352232	0	0	0	0	0	0	0	0	0	0	0
chr1_35972024_36027298_+	ENSG00000126070.19	AGO3	chr1	35972024	36027298	+	ENST00000634486.1	3	14	0	0	0	0	0	0.388474	0	0	0	0	0	0.438693	0	0	0	0	0	0	0	0	0	0	0	0	0	0	0.297039	0	0	0	0	0	0	0	0	0	0	0	0	0
chr1_35972024_36039984_+	ENSG00000126070.19	AGO3	chr1	35972024	36039984	+	ENST00000634486.1	3	17	0	0	0	0	0	0	0	0	0	0	0	0	0	0	0	0	0	0	0	0	0	0	0	0	0	0	0	0	0	0	0	0	0	0	0	0	0	0	0	0
chr1_35972024_36043548_+	ENSG00000126070.19	AGO3	chr1	35972024	36043548	+	ENST00000634486.1	3	19	0	0	0	0	0	0	0	0	0	0	0	0	0	0	0	0	0	0	0	0	0	0	0	0	0	0	0	0	0	0	0	0	0	0	0	0	0	0	0	0
chr1_35973375_35984548_+	ENSG00000126070.19	AGO3	chr1	35973375	35984548	+	ENST00000634486.1	4	6	0	0	0	0	0	0	0	0	0	0	0	0	0	0	0	0	0	0	0	0	0	0	0	0	0	0	0	0	0	0	0	0	0	0	0	0	0	0	0	0
chr1_35973375_36027298_+	ENSG00000126070.19	AGO3	chr1	35973375	36027298	+	ENST00000634486.1	4	14	0	0	0	0	0	0	0	0	0	0	0	0	0	0	0	0	0	0	0	0	0	0	0	0	0	0	0	0	0	0	0	0	0	0	0.257402	0	0	0	0	0
chr1_35973375_36034333_+	ENSG00000126070.19	AGO3	chr1	35973375	36034333	+	ENST00000634486.1	4	15	0	0	0	0	0	0	0	0	0	0	0	0	0	0	0	0	0	0	0	0	0	0	0	0	0	0	0	0	0	0	0	0	0	0	0	0	0	0	0	0
chr1_35982621_36009594_+	ENSG00000126070.19	AGO3	chr1	35982621	36009594	+	ENST00000634486.1	5	11	0	0	0	0	0	0	0	0	0	0	0	0	0	0	0	0	0	0	0.686496	0	0	0	0	0	0	0	0	0	0	0	0	0	0	0	0	0	0	0	0	0
chr1_35984470_36008777_+	ENSG00000126070.19	AGO3	chr1	35984470	36008777	+	ENST00000634486.1	6	9	0	0	0	0	0	0	0	0	0	0	0	0	0	0.336626	0	0	0	0	0	0	0	0	0	0	0	0	0	0	0	0	0	0	0	0	0	0	0	0	0	0
chr1_35984470_36014048_+	ENSG00000126070.19	AGO3	chr1	35984470	36014048	+	ENST00000634486.1	6	13	0	0	0	0	0	0	0	0	0	0	0	0	0	0	0	0	0	0	0	0	0	0	0	0	0	0	0	0	0	0	0	0	0	0	0	0	0	0	0	0
chr1_36004341_36009044_+	ENSG00000126070.19	AGO3	chr1	36004341	36009044	+	ENST00000634486.1	7	10	0	0	0	0	0	0	0	0	0	0	0	0	0	0	0	0	0	0	0	0	0	0	0	0.848167	0	0	0	0	0	0	0	0	0	0	0	0	0	0	0	0
chr1_36004341_36009594_+	ENSG00000126070.19	AGO3	chr1	36004341	36009594	+	ENST00000634486.1	7	11	0.263777	0	0	0	0.311608	0	0	0	0	0	0	0.877386	0	0	0	0	0.273746	0	0.22612	0	0	0	0.331496	0.399049	0	0	0.297039	0	0	0.561233	0.279556	0	0	0.188509	0.239396	0.648101	0	0.366884	0	0
chr1_36004341_36013752_+	ENSG00000126070.19	AGO3	chr1	36004341	36013752	+	ENST00000634486.1	7	12	0	0	0	0	0	0	0	0	0	0	0	0	0	0	0	0	0	0	0	0	0	0	0	0	0	0	0	0	0	0	0	0	0	0.188509	0	0	0	0	0	0
chr1_36004341_36014048_+	ENSG00000126070.19	AGO3	chr1	36004341	36014048	+	ENST00000634486.1	7	13	0	0	0	0	0.623215	0.902247	0	0	1.4565	0	0	0.24094	0	0	0	0	0	0.292181	1.84612	0	0	0.170444	0	0	0	0	0	0.26688	0.595312	0.229511	0.547682	0	0	0.261939	0	0	0.447303	0	0.359576	0
chr1_36004341_36027298_+	ENSG00000126070.19	AGO3	chr1	36004341	36027298	+	ENST00000634486.1	7	14	0.270788	0	0	0	0.224177	0.217621	0	0	0.267055	0	0	0.877386	0.285577	0	0	0	0.263939	0	1.88224	0	0	0	0	0.424084	0.583509	0	0	0.3276	0	0	0	0.298654	0	0.785818	0	0	0	0.366884	0.359576	0
chr1_36004341_36036267_+	ENSG00000126070.19	AGO3	chr1	36004341	36036267	+	ENST00000634486.1	7	16	0	0	0	0	0	0	0.320729	0	0	0	0	0	0	0	0	0	0	0	0	0	0	0	0	0	0	0	0.297039	0	0	0	0	0	0	0	0	0	0	0	0	0
chr1_36004341_36040441_+	ENSG00000126070.19	AGO3	chr1	36004341	36040441	+	ENST00000634486.1	7	18	0	0	0.406021	0	0	0	0	0	0	0	0	0	0	0	0.559125	0	0	0	0	0	0	0	0	0	0	0	0	0	0	0	0	0	0	0.188509	0	0	0	0	0	0
chr1_36004341_36043548_+	ENSG00000126070.19	AGO3	chr1	36004341	36043548	+	ENST00000634486.1	7	19	0	0	0.326655	0.604644	0	0	0	0	0	0	0	0	0	0	0	0.291251	0	0	0.291262	0	0	0	0	0	1.16702	0	0	0.3276	0	0	0	0	0	0	0	0	0	0.183442	0	0
chr1_36005719_36014048_+	ENSG00000126070.19	AGO3	chr1	36005719	36014048	+	ENST00000634486.1	8	13	0	0	0	0	0	0	0	0	0	0	0	0	0	0	0	0	0	0	0	0	0	0	0	0	0	0	0	0	0	0	0	0	0	0	0	0	0	0	0.359576	0
chr1_36008690_36009594_+	ENSG00000126070.19	AGO3	chr1	36008690	36009594	+	ENST00000634486.1	9	11	0	0	0	0	0	0	0	0	0	0	0	0	0	0	0	0	0.537685	0	0	0	0	0	0	0.399049	0	0	0	0	0.297656	0	0	0	0	0	0	0	0	0	0	0
chr1_36008690_36013752_+	ENSG00000126070.19	AGO3	chr1	36008690	36013752	+	ENST00000634486.1	9	12	0	0	0	0	0	0	0	0	0	0	0	0	0	0	0	0	0	0	0	0	0	0	0	0	0	0	0	0	0	0	0	0	0	0	0	0	0	0	0	0
chr1_36008690_36014048_+	ENSG00000126070.19	AGO3	chr1	36008690	36014048	+	ENST00000634486.1	9	13	0	0	0	0	0	0	0	0	0	0	0	0	0	0	0	0	0	0	0	0	0	0	0	0	0	0	0	0	0	0	0	0	0	0	0	0	0	0	0	0
chr1_36008690_36027298_+	ENSG00000126070.19	AGO3	chr1	36008690	36027298	+	ENST00000634486.1	9	14	0	0	0	0	0	0	0	0	0	0	0	0	0	0	0	0	0	0	0	0	0	0	0	0	0	0	0	0	0	0	0.547682	0	0	0	0	0	0	0	0	0
chr1_36008690_36040441_+	ENSG00000126070.19	AGO3	chr1	36008690	36040441	+	ENST00000634486.1	9	18	0	0	0	0	0.401187	0	0	0	0	0	0	0	0	0	0	0	0	0	0	0	0	0	0	0	0	0	0	0	0	0	0	0	0	0	0	0	0	0	0	0
chr1_36008690_36043548_+	ENSG00000126070.19	AGO3	chr1	36008690	36043548	+	ENST00000634486.1	9	19	0	0	0	0	0	0	0	0	0	0	0	0	0	0	0	0	0.263939	0	0	0	0	0	0	0	0	0	0	0	0	0	0	0	0	0.188509	0	0	0	0	0	0
chr1_36008690_36055145_+	ENSG00000126070.19	AGO3	chr1	36008690	36055145	+	ENST00000634486.1	9	20	0	0	0	0	0	0	0	0	0	0	0	0	0	0	0	0	0	0	0	0	0	0	0	0	0	0	0	0	0	0	0	0	0	0	0	0	0	0	0	0
chr1_36008897_36055145_+	ENSG00000126070.19	AGO3	chr1	36008897	36055145	+	ENST00000634486.1	10	20	0.483388	0	0	0	0	0	0	0	0	0	0	0	0	0	0	0	0	0	0	0	0	0	0	0	0	0	0	0	0	0	0	0	0	0	0	0	0	0	0	0
chr1_36009475_36014048_+	ENSG00000126070.19	AGO3	chr1	36009475	36014048	+	ENST00000634486.1	11	13	0	0	0	0	0	0	0	0	1.18945	0	0	0	0	0	0	0	0	0	0	0	0	0	0	0	0	0	0	0	0	0	0	0	0	0	0	0	0	0	0.344189	0
chr1_36009475_36027298_+	ENSG00000126070.19	AGO3	chr1	36009475	36027298	+	ENST00000634486.1	11	14	0	0	0	0	0.224177	0	0	0	0	0	0	0	0	0	0	0	0	0	0	0	0	0	0	0	0	0	0	0	0	0	0	0	0	0	0	0	0.292743	0	0.703765	0
chr1_36009475_36034333_+	ENSG00000126070.19	AGO3	chr1	36009475	36034333	+	ENST00000634486.1	11	15	0	0	0	0	0	0	0	0	0	0	0	0	0	0	0	0	0	0	0	0	0	0	0	0	0	0	0	0	0	0	0	0	0	0	0	0	0	0	0	0
chr1_36009475_36043548_+	ENSG00000126070.19	AGO3	chr1	36009475	36043548	+	ENST00000634486.1	11	19	0	0	0	0	0	0	0	0	0	0	0	0	0	0	0	0	0	0	0.457664	0	0	0	0	0	0	0	0	0	0	0	0	0	0	0	0	0	0	0	0	0.364473
chr1_36013630_36014048_+	ENSG00000126070.19	AGO3	chr1	36013630	36014048	+	ENST00000634486.1	12	13	0	0	0	0	0	0	0	0	0	0	0	0	0	0	0	0.291251	0	0	0.457664	0	0	0.246697	0	0	0	0	0	0	0	0	0	0.252936	0	0	0	0.432068	0	0	0	0
chr1_36013630_36040441_+	ENSG00000126070.19	AGO3	chr1	36013630	36040441	+	ENST00000634486.1	12	18	0	0	0	0	0	0	0	0	0	0	0	0	0	0	0.559125	0	0	0	0	0	0	0	0	0	0	0	0	0	0	0	0	0	0	0	0	0	0	0	0	0
chr1_36027114_36036267_+	ENSG00000126070.19	AGO3	chr1	36027114	36036267	+	ENST00000634486.1	14	16	0	0	0	0	0	0	0	0	0	0	0	0	0	0	0	0	0	0	0	0	0	0	0	0	0	0	0	0	0.297656	0	0	0	0	0	0	0	0	0	0	0
chr1_36027114_36040441_+	ENSG00000126070.19	AGO3	chr1	36027114	36040441	+	ENST00000634486.1	14	18	0	0	0	0	0	0	0	0	0	0	0	0	0	0	0	0	0	0	0	0	0	0	0	0	0	0	0	0	0	0	0	0	0	0	0	0.227166	0	0	0	0
chr1_36027114_36043548_+	ENSG00000126070.19	AGO3	chr1	36027114	36043548	+	ENST00000634486.1	14	19	0	0	0	0	0	0	0	0	0	0	0	0	0	0	0	0	0	0	0.228832	0	0	0	0	0	0	0	0.298068	0	0	0	0	0	0	0	0	0	0	0	0	0
chr1_36027114_36055145_+	ENSG00000126070.19	AGO3	chr1	36027114	36055145	+	ENST00000634486.1	14	20	0	0	0	0	0	0	0	0	0	0	0	0	0	0	0	0	0	0	0	0	0	0	0	0	0	0	0	0	0	0	0	0.252936	0	0	0	0	0	0	0	0
chr1_36034174_36036267_+	ENSG00000126070.19	AGO3	chr1	36034174	36036267	+	ENST00000634486.1	15	16	0	0	0	0	0.224177	0	0	0	0	0	0	0	0	0	0	0	0	0	0	0	0	0	0	0	0	0	0	0	0	0	0	0	0	0	0	0	0	0	0	0
chr1_36034174_36039984_+	ENSG00000126070.19	AGO3	chr1	36034174	36039984	+	ENST00000634486.1	15	17	0	0	0	0	0	0	0	0	0	0	0	0	0	0	0	0	0	0	0	0.276051	0	0	0	0	0	0	0	0	0	0	0	0	0	0	0	0	0	0	0	0
chr1_36034174_36040441_+	ENSG00000126070.19	AGO3	chr1	36034174	36040441	+	ENST00000634486.1	15	18	0	0	0	0	0	0	0	0	0	0	0	0	0	0	0	0	0	0	0	0	0	0	0	0	0	0	0	0	0	0.500492	0	0	0	0	0	0	0	0	0	0
chr1_36034174_36043548_+	ENSG00000126070.19	AGO3	chr1	36034174	36043548	+	ENST00000634486.1	15	19	0	0	0	0	0	0	0	0	0	0	0.286956	0	0	0	0	0	0	0	0	0	0	0	0.552789	0	0	0	0	0	0	0.229511	0	0	0	0.261939	0	0	0.267418	0	0	0
chr1_36036177_36040441_+	ENSG00000126070.19	AGO3	chr1	36036177	36040441	+	ENST00000634486.1	16	18	0	0	0	0	0	0	0	0	0	0	0.251606	0	0	0	0	0	1.06143	0	0	0	0	0	0	0	0	0	0	0	0	0	0	0	0	0	0	0	0	0	0	0
chr1_36036177_36043548_+	ENSG00000126070.19	AGO3	chr1	36036177	36043548	+	ENST00000634486.1	16	19	0.812365	0	0	0	0	0	0	0	0	0	0	0	0	0	0	0	0	0	0	0	0	0	0	0	0	0	0	0	0	0	0	0	0.56721	0	0	0	0	0	0	0
chr1_36039790_36040441_+	ENSG00000126070.19	AGO3	chr1	36039790	36040441	+	ENST00000634486.1	17	18	0	0	0	0	0	0	0	0	0	0	0	0	0	0	0.559125	0	0	0.84403	0.22612	0	0.479282	0	0	0.292128	0	0	0	0	0	0	0	0	0	0	0	0	0	0	0	0
chr1_36039790_36043548_+	ENSG00000126070.19	AGO3	chr1	36039790	36043548	+	ENST00000634486.1	17	19	0	0	0	0	0	0	0.216125	0	0	0	0	0	0	0	0	0	0	0.422015	0.681071	0	0	0	0	0	0	0.322986	0	0	0	0	0	0.505871	0	0	0	0	0	0	0.344189	0
chr1_35816882_35817047_+	ENSG00000134698.10	AGO4	chr1	35816882	35817047	+	ENST00000373210.3	2	2	0	0	0	0	0	0	0	0	0	0	0	0	0	0	0	0	0	0	0	0	0	0	0	0.584256	0	0	0	0	0	0	0	0	0	0	0	0	0	0	0	0
chr1_35816882_35822982_+	ENSG00000134698.10	AGO4	chr1	35816882	35822982	+	ENST00000373210.3	2	3	0	0	0	0	0	0	0	0	0	0	0	0	0	0	0	0	0	0	0	0	0	0	0.276394	0	0	0	0	0	0	0	0	0	0	0	0	0	0	0	0	0
chr1_35816882_35825494_+	ENSG00000134698.10	AGO4	chr1	35816882	35825494	+	ENST00000373210.3	2	4	0	0	0	0	0	0.217621	0	0	0	0	0	0	0	0	0	0	0	0	0	0	0	0	0	0	0	0	0	0	0	0	0	0	0	0	0	0	0	0	0	0
chr1_35816882_35825815_+	ENSG00000134698.10	AGO4	chr1	35816882	35825815	+	ENST00000373210.3	2	5	0	0	0	0	0	0	0	0	0	0	0	0	0	0	0	0	0	0	0	0	0	0	0	0	0	0	0	0	0	0	0	0	0	0	0	0	0.585486	0	0	0
chr1_35816882_35826835_+	ENSG00000134698.10	AGO4	chr1	35816882	35826835	+	ENST00000373210.3	2	7	0	0	0	0	0.224177	0	0	0	0	0	0	0	0	0	0	0.332188	0.263939	0	0.22612	0	0.234719	0	0	0.399049	0	0	0.298068	0	0	0	0	0	0	0	0.797622	0.432068	0	0	0	0
chr1_35816882_35832185_+	ENSG00000134698.10	AGO4	chr1	35816882	35832185	+	ENST00000373210.3	2	10	0	0	0	0	0	0	0	0	0	0	0	0	0	0.186709	0	0	0	0	0	0	0	0	0	0	0	0	0	0	0	0	0	0	0	0	0	0	0	0	0	0
chr1_35816882_35834174_+	ENSG00000134698.10	AGO4	chr1	35816882	35834174	+	ENST00000373210.3	2	12	0	0	0	0	0	0	0	0	0	0	0	0	0	0	0	0	0	0	0.228832	0	0	0	0	0	0	0	0	0	0	0	0	0	0	0	0	0	0	0	0	0
chr1_35816882_35835993_+	ENSG00000134698.10	AGO4	chr1	35816882	35835993	+	ENST00000373210.3	2	13	0	0	0	0	0	0	0	0	0	0	0	0	0	0	0	0	0	0	0	0	0	0.246697	0	0	0.692705	0	0	0	0	0	0	0	0.341285	0	0.27011	0.432068	0.447303	0.351782	0	0
chr1_35816882_35841750_+	ENSG00000134698.10	AGO4	chr1	35816882	35841750	+	ENST00000373210.3	2	15	0.263777	0.343846	0	0.673104	0	0	0	0.414318	0	0	0	0	0	0.187263	0	0.664375	0	0	0	0	0	0	0	0	0	0	0	0	0.297656	0	0	0	0	0	0	0	0.292743	0	0	0
chr1_35816882_35850258_+	ENSG00000134698.10	AGO4	chr1	35816882	35850258	+	ENST00000373210.3	2	16	0	0	0	0	0	0	0	0	0	0	0	0	0	0	0	0	0	0	0	0	0	0	0	0	0	0	0	0	0	0	0	0	0	0	0	0.710375	0	0	0	0
chr1_35816882_35851053_+	ENSG00000134698.10	AGO4	chr1	35816882	35851053	+	ENST00000373210.3	2	17	0	0	0	0	0.311608	0	0	0	0	0	0	0	0	0	0	0	0	0	0	0	0	0.246697	0	0	0	0	0.298068	0	0.297656	0	0	0	0	0	0	0	0	0	0	0
chr1_35822862_35826835_+	ENSG00000134698.10	AGO4	chr1	35822862	35826835	+	ENST00000373210.3	3	7	0	0	0	0	0	0	0	0	0	0.547384	0	0	0	0	0	0.291251	0.821239	0	0.22612	0	0	0	0	0	0	0	0	0	0	0	0.279556	0	0	0	0	0	0	0.16834	0	0
chr1_35822862_35835993_+	ENSG00000134698.10	AGO4	chr1	35822862	35835993	+	ENST00000373210.3	3	13	0	0	0	0	0	0	0	0	0	0	0	0	0	0	0	0	0	0	0	0	0	0	0	0	0	0	0	0	0	0	0	0	0	0	0	0	0.447303	0	0	0
chr1_35822862_35851053_+	ENSG00000134698.10	AGO4	chr1	35822862	35851053	+	ENST00000373210.3	3	17	0	0	0	0	0	0	0	0.414318	0	0	0	0	0	0	0	0	0	0	0	0	0	0	0	0	0	0	0	0	0	0	0	0	0	0	0	0	0	0	0	0
chr1_35825313_35826835_+	ENSG00000134698.10	AGO4	chr1	35825313	35826835	+	ENST00000373210.3	4	7	0.527554	0	0	0	0	0	0	0	0	0	0	0	0	0	0	0	0	0	0	0	0	0	0	0	0	0	0.298068	0	0	0	0	0	0	0	0	0	0.447303	0	0	0
chr1_35825313_35835993_+	ENSG00000134698.10	AGO4	chr1	35825313	35835993	+	ENST00000373210.3	4	13	0	0	0	0	0	0	0	0	0	0.629299	0	0	0	0	0	0	0	0	0	0	0	0	0	0	0	0	0	0.353169	0	0	0	0	0	0	0	0	0	0	0	0
chr1_35825313_35841750_+	ENSG00000134698.10	AGO4	chr1	35825313	35841750	+	ENST00000373210.3	4	15	0	0	0	0	0	0	0	0	0	0	0	0	0	0	0	0	0	0	0	0	0	0	0	0	0	0	0	0	0	0	0	0	0	0	0	0	0	0	0.359576	0
chr1_35831427_35834174_+	ENSG00000134698.10	AGO4	chr1	35831427	35834174	+	ENST00000373210.3	8	12	0	0	0	0	0	0	0	0	0	0	0	0	0	0	0	0	0	0	0	0	0	0	0	0	0	0	0	0	0	0	0	0	0	0	0	0	0	0	0.567498	0
chr1_35831427_35835993_+	ENSG00000134698.10	AGO4	chr1	35831427	35835993	+	ENST00000373210.3	8	13	0	0	0.326655	0	0	0	0	0	0	0.547384	0.400444	0.559888	0	0	0	1.29939	0	0	2.03508	0	0	0	0.829183	0	0	0	0	0	1.0567	0.229511	0	0	0	0	0	0	0	1.26899	0.359576	0
chr1_35831812_35851053_+	ENSG00000134698.10	AGO4	chr1	35831812	35851053	+	ENST00000373210.3	9	17	0	0	0	0	0	0	0	0	0	0	0	0	0	0	0	0	0	0	0	0	0	0	0	0	0	0	0	0	0	0	0	0	0	0	0	0	0	0	0	0
chr1_35832057_35851053_+	ENSG00000134698.10	AGO4	chr1	35832057	35851053	+	ENST00000373210.3	10	17	0	0	0	0	0	0	0	0	0	0	0	0	0	0	0	0	0	0	0	0	0	0	0	0	0	0	0	0	0	0	0	0	0	0	0	0	0	0.338014	0	0
chr1_35835834_35850258_+	ENSG00000134698.10	AGO4	chr1	35835834	35850258	+	ENST00000373210.3	13	16	0	0	0	0	0	0	0	0	0	0	0	0	0	0	0	0.332188	0	0	0	0	0	0	0	0	0	0	0	0	0	0	0	0	0	0	0	0	0	0	0	0
chr1_35841165_35841750_+	ENSG00000134698.10	AGO4	chr1	35841165	35841750	+	ENST00000373210.3	14	15	0.241694	0	0	0	0	0	0	0	0	0	0	0.481881	0	0	0	0	0	0	0	0	0	0	0	0	0	0	0	0.26688	0	0	0	0	0	0	0	0	0	0	0	0
chr1_35841165_35850258_+	ENSG00000134698.10	AGO4	chr1	35841165	35850258	+	ENST00000373210.3	14	16	0	0	0	0	0	0	0	0	0	0	0	0	0	0	0.316699	0	0.35381	0	0	0	0	0	0	0	0	0.432484	0	0	0	0	0	0	0	0	0	0	0	0	0	0
chr1_35841165_35851053_+	ENSG00000134698.10	AGO4	chr1	35841165	35851053	+	ENST00000373210.3	14	17	0	0	0.326655	0	0	0.435243	0	0.45884	0	0	0	0	0	0	0	0	0	0	0.22612	0	0	0	0	0	0	0	1.09297	0	0.352232	0.500492	0	0	0.269653	0.340425	0.239396	0	0	0	0	0
chr1_35850157_35851053_+	ENSG00000134698.10	AGO4	chr1	35850157	35851053	+	ENST00000373210.3	16	17	0	0	0	0	0	0	0	0	0	0	0	0	0	0	0	0	0	0	0	0	0	0	0	0	0	0	0	0.176584	0	0	0	0	0	0	0	0	0	0	0.344189	0
chr1_1022201_1022462_+	ENSG00000188157.14	AGRN	chr1	1022201	1022462	+	ENST00000620552.4	2	2	0	0	0	0	0.896708	0	0	0	0	0	0	0	0	0	0	0	0	0	0	0	0	0	0	0	0	0.432484	0	0	0	0	0	0	0	1.3617	0	0	0	0.16834	0	0.364473
chr1_1022201_1035324_+	ENSG00000188157.14	AGRN	chr1	1022201	1035324	+	ENST00000620552.4	2	3	0	0	0	0	0	0	0	0	0	0	0	0	0	0	0	0	0	0	0	0	0	0	0	0	0	0	0	0	0	0	1.09536	0	0	0	0	0	0	0	0	0
chr1_1035277_1051815_+	ENSG00000188157.14	AGRN	chr1	1035277	1051815	+	ENST00000620552.4	3	34	0	0	0	0	0	0	0	0	0	0	0	0	0	0	0	0	0	0	0	0	0	0	0	0	0	0	0	0	0	0	0	0	0	0.340425	0	0	0	0	0	0
chr1_1043239_1045876_+	ENSG00000188157.14	AGRN	chr1	1043239	1045876	+	ENST00000620552.4	8	15	0	0	0	0	0	0	0	0	0	0	0	0	0	0	0	0	0	0	0	0	0	0	0	0	0	0	0	0	0	0	0	0	0	0	0	0	0	0	0	0
chr1_1043239_1051815_+	ENSG00000188157.14	AGRN	chr1	1043239	1051815	+	ENST00000620552.4	8	34	0	0	0	0	0	0	0	0	0	0	0	0	0	0	0	0	0	0	0	0	0	0.170444	0	0	0	0	0	0	0	0	0	0	0	0	0	0.710375	0.267418	0	0	0
chr1_1043538_1043732_+	ENSG00000188157.14	AGRN	chr1	1043538	1043732	+	ENST00000620552.4	9	9	0	0	0	0	0.224177	0	0	0	0	0	0	0	0	0	0	0	0	0	0	0	0	0	0	0	0	0	0	0	0	0	0	0	0	0	0	0	0	0	0	0
chr1_1044109_1044257_+	ENSG00000188157.14	AGRN	chr1	1044109	1044257	+	ENST00000620552.4	11	11	0	0	0	0	0	0	0	0	0	0	0	0	0	0	0	0	0	0	0	0.276051	0	0	0	0	0	0	0	0	0	0	0	0	0	0	0	0	0	0	0	0
chr1_1044334_1051815_+	ENSG00000188157.14	AGRN	chr1	1044334	1051815	+	ENST00000620552.4	12	34	0	0	0	0	0	0	0	0	0	0	0	0	0	0	0	0	0	0	0	0	0	0	0	0	0	0	0	0	0	0.250246	0	0	0	0	0	0	0	0	0	0
chr1_1045964_1046088_+	ENSG00000188157.14	AGRN	chr1	1045964	1046088	+	ENST00000620552.4	16	16	0	0	0	0	0	0	0	0	0	0	0	0	0	0	0	0	0	0	0	0	0	0	0	0	0	0	0	0	0	0	0	0	0	0	0	0	0	0	0	0
chr1_1045964_1046265_+	ENSG00000188157.14	AGRN	chr1	1045964	1046265	+	ENST00000620552.4	16	17	0	0	0	0	0	0	0	0	0	0	0	0	0	0	0	0	0	0	0	0	0	0	0	0	0	0	0	0	0	0	0	0	0	0	0	0	0	0	0.344189	0
chr1_1046160_1046265_+	ENSG00000188157.14	AGRN	chr1	1046160	1046265	+	ENST00000620552.4	17	17	0	0	0	0	0	0	0	0	0	0	0	0	0	0	0	0	0	0	0	0	0	0	0	0	0	0	0	0	0	0	0	0	0	0	0	0	0	0	0	0
chr1_1046160_1046957_+	ENSG00000188157.14	AGRN	chr1	1046160	1046957	+	ENST00000620552.4	17	19	0	0	0	0	0	0	0	0	0.267055	0	0	0	0	0	0	0	0	0	0	0	0	0.187335	0	0	0	0	0	0	0	0	0	0	0	0	0	0	0	0	0	0.364473
chr1_1046397_1046957_+	ENSG00000188157.14	AGRN	chr1	1046397	1046957	+	ENST00000620552.4	18	19	0	0	0	0	0	0	0	0	0	0	0	0	0	0	0	0	0	0	0	0	0	0	0	0	0	0	0	0	0	0	0	0	0	0	0	0	0	0	0	0
chr1_1046820_1048365_+	ENSG00000188157.14	AGRN	chr1	1046820	1048365	+	ENST00000620552.4	19	23	0	0	0	0	0	0	0	0	0	0	0	0	0	0	0	0	0	0	0	0	0	0	0	0	0	0	0	0	0	0	0	0.597308	0	0	0	0	0	0	0	0
chr1_1047327_1051369_+	ENSG00000188157.14	AGRN	chr1	1047327	1051369	+	ENST00000620552.4	20	32	0	0	0	0	0	0	0	0	0	0	0	0	0	0	0	0	0	0	0	0	0	0.374669	0	0	0	0	0	0	0	0	0	0	0	0	0	0	0	0	0	0
chr1_1050233_1051369_+	ENSG00000188157.14	AGRN	chr1	1050233	1051369	+	ENST00000620552.4	28	32	0	0	0	0	0	0	0	0	0	0	0	0	0	0	0	0	0	0	0	0	0	0	0	0	0	0	0	0	0	0	0	0	0	0	0	0	0	0	0	0
chr1_1050427_1050837_+	ENSG00000188157.14	AGRN	chr1	1050427	1050837	+	ENST00000620552.4	29	30	0	0	0	0	0	0	0	0	0	0	0	0	0	0	0	0	0	0	0	0	0	0	0	0	0	0	0	0	0	0	0	0	0	0	0	0	0	0	0	0
chr1_246916142_246918377_-	ENSG00000153207.14	AHCTF1	chr1	246916142	246918377	-	ENST00000366508.5	3	2	0	0	0	0	0	0	0	0	0	0	0	0	0	0	0	0	0	0	0	0	0	0	0	0	0	0	0	0	0	0	0	0	0	0	0	0	0	0	0	0
chr1_246913232_246918377_-	ENSG00000153207.14	AHCTF1	chr1	246913232	246918377	-	ENST00000366508.5	4	2	1.23757	0.306634	0.406021	0	0.311608	0	0.216125	0	0	0.547384	0	0	0	0.336626	0	0	0	0	0.520094	0	0.262044	0.170444	0.310838	0	0	0.864969	0	0.353169	0	0	0.547682	0.551589	0	0.261939	0	0	0	0.16834	0.344189	1.77895
chr1_246913232_246913412_-	ENSG00000153207.14	AHCTF1	chr1	246913232	246913412	-	ENST00000366508.5	4	4	0	0	0	0	0	0	0	0	0	0	0	0	0	0	0	0	0	0	0	0	0	0	0	0	0	0	0	0	0	0	0	0	0	0	0	0	0	0	0	0
chr1_246907551_246918377_-	ENSG00000153207.14	AHCTF1	chr1	246907551	246918377	-	ENST00000366508.5	5	2	0	0	0	0	0	0	0	0	0	0	0	0	0	0	0	0	0	0	0	0	0	0	0	0	0	0	0	0	0	0	0	0	0	0	0	0.216034	0	0	0	0
chr1_246903949_246918377_-	ENSG00000153207.14	AHCTF1	chr1	246903949	246918377	-	ENST00000366508.5	7	2	0	0.406923	0	0	0	0	0	0	0	0	0	0	0	0	0	0	0	0	0	0	0	0.170444	0	0	0	0	0	0	0	0	0	0	0	0	0	0	0	0	0	0
chr1_246902525_246918377_-	ENSG00000153207.14	AHCTF1	chr1	246902525	246918377	-	ENST00000366508.5	8	2	0	0	0	0	0	0	0	0	0	0	0	0	0	0	0	0	0	0	0	0	0	0	0	0	0	0	0	0	0	0	0	0	0	0	0	0	0	0	0	0
chr1_246902525_246916395_-	ENSG00000153207.14	AHCTF1	chr1	246902525	246916395	-	ENST00000366508.5	8	3	0	0	0	0	0	0	0	0	0	0	0	0.318948	0	0	0	0	0	0	0	0	0	0	0	0	0	0	0	0	0	0	0.547682	0	0	0	0	0	0	0	0	0
chr1_246900065_246913412_-	ENSG00000153207.14	AHCTF1	chr1	246900065	246913412	-	ENST00000366508.5	10	4	0	0	0	0	0.401187	0	0	0	0	0	0	0	0	0	0	0	0	0	0	0	0	0	0	0	0	0	0	0	0	0	0	0	0	0	0	0	0	0	0	0
chr1_246899451_246918377_-	ENSG00000153207.14	AHCTF1	chr1	246899451	246918377	-	ENST00000366508.5	11	2	0	0	0	0	0.311608	0	0	0	0	0	0	0	0	0	0	0	0	0	0	0	0	0	0	0	0	0	0	0	0	0	0	0	0	0	0	0	0	0	0	0
chr1_246898208_246918377_-	ENSG00000153207.14	AHCTF1	chr1	246898208	246918377	-	ENST00000366508.5	12	2	0	0	0	0	0	0	0	0	0	0	0	0	0	0	0	0	0	0	0	0	0	0	0	0	0	0	0	0	0	0	0	0	0	0.261939	0	0	0	0	0	0
chr1_246895835_246918377_-	ENSG00000153207.14	AHCTF1	chr1	246895835	246918377	-	ENST00000366508.5	13	2	0	0	0	0	0	0	0	0	0	0	0	0	0	0	0	0	0	0	0	0	0	0	0	0	0	0	0	0	0	0	0	0	0	0	0	0	0	0	0	0
chr1_246894659_246918377_-	ENSG00000153207.14	AHCTF1	chr1	246894659	246918377	-	ENST00000366508.5	14	2	0	0	0	0	0	0	0	0	0	0	0	0	0	0	0	0	0	0	0	0.276051	0	0	0.331496	0	0	0	0	0	0	0	0	0	0	0	0	0	0	0	0	0
chr1_246894659_246904033_-	ENSG00000153207.14	AHCTF1	chr1	246894659	246904033	-	ENST00000366508.5	14	7	0	0	0	0	0	0	0	0	0	0	0	0	0	0	0	0	0	0	0	0	0	0	0	0	0	0	0	0	0	0	0	0	0	0	0	0	0	0.183442	0	0
chr1_246894659_246898336_-	ENSG00000153207.14	AHCTF1	chr1	246894659	246898336	-	ENST00000366508.5	14	12	0	0	0	0.673104	0	0	0	0	0	0	0	0	0	0	0	0	0	0	0	0	0	0	0	0	0	0	0	0	0	0	0	0	0	0	0	0	0	0	0	0
chr1_246891779_246895925_-	ENSG00000153207.14	AHCTF1	chr1	246891779	246895925	-	ENST00000366508.5	15	13	0	0	0	0	0	0	0	0	0	0	0	0	0	0	0	0	0	0	0	0	0	0.187335	0	0	0	0	0	0	0	0	0	0	0	0	0	0	0	0	0	0
chr1_246887211_246888517_-	ENSG00000153207.14	AHCTF1	chr1	246887211	246888517	-	ENST00000366508.5	20	18	0	0	0	0	0	0	0	0	0	0	0	0	0	0	0	0	0	0	0	0	0	0	0	0	0	0	0	0	0	0	0	0	0	0	0	0.216034	0	0	0	0
chr1_246887211_246888233_-	ENSG00000153207.14	AHCTF1	chr1	246887211	246888233	-	ENST00000366508.5	20	19	0	0	0	0	0	0	0	0	0	0	0	0	0	0	0	0	0	0	0	0	0	0	0	0	0	0	0	0	0	0	0	0	0	0	0	0	0	0	0	0
chr1_246885493_246918377_-	ENSG00000153207.14	AHCTF1	chr1	246885493	246918377	-	ENST00000366508.5	21	2	0	0	0	0	0	0	0	0	0	0	0	0	0	0	0	0	0	0	0	0	0.524088	0	0	0	0	0	0	0	0.561837	0	0	0	0	0	0	0	0	0	0.344189	0
chr1_246885493_246907758_-	ENSG00000153207.14	AHCTF1	chr1	246885493	246907758	-	ENST00000366508.5	21	5	0	0	0	0	0	0	0	0	0	0	0	0	0	0	0	0	0	0	0	0	0	0	0	0	0	0	0	0	0	0.229511	0	0	0	0	0	0	0	0	0	0
chr1_246885493_246891919_-	ENSG00000153207.14	AHCTF1	chr1	246885493	246891919	-	ENST00000366508.5	21	15	0	0	0	0	0	0	0	0	0	0	0	0	0	0	0	0	0	0	0	0	0	0	0	0	0	0	0	0	0	0	0	0	0.225925	0	0	0	0	0	0	0
chr1_246885493_246891060_-	ENSG00000153207.14	AHCTF1	chr1	246885493	246891060	-	ENST00000366508.5	21	16	0	0	0	0	0	0	0	0	0	0	0	0	0	0	0	0	0	0	0	0	0	0	0	0	0	0	0	0	0	0	0	0	0	0	0	0	0	0	0	0
chr1_246885493_246888517_-	ENSG00000153207.14	AHCTF1	chr1	246885493	246888517	-	ENST00000366508.5	21	18	0	0	0	0	0.311608	0	0	0	0	0	0	0.24094	0	0	0	0	0	0	0	0	0	0	0	0	0	0	0	0	0	0	0	0	0	0	0	0	0	0	0	0
chr1_246885493_246885680_-	ENSG00000153207.14	AHCTF1	chr1	246885493	246885680	-	ENST00000366508.5	21	21	0	0	0	0	0	0	0	0	0	0	0	0	0	0	0	0	0	0	0	0	0	0	0	0	0	0	0	0	0	0	0	0	0	0	0.257402	0	0.585486	0	0	0
chr1_246876950_246888517_-	ENSG00000153207.14	AHCTF1	chr1	246876950	246888517	-	ENST00000366508.5	23	18	0	0	0	0	0	0	0	0	0	0.581	0	0	0	0	0	0	0	0	0	0	0	0	0	0	0	0	0	0	0	0	0	0	0	0	0	0	0	0	0	0
chr1_246876950_246877302_-	ENSG00000153207.14	AHCTF1	chr1	246876950	246877302	-	ENST00000366508.5	23	22	0	0	0	0	0	0	0	0	0	0	0	0	0	0	0	0	0	0	0	0	0	0	0	0	0	0	0	0	0	0.250246	0	0	0	0	0	0	0	0	0	0
chr1_246876037_246918377_-	ENSG00000153207.14	AHCTF1	chr1	246876037	246918377	-	ENST00000366508.5	24	2	0.241694	0.750769	0	0	0	0	0	0	0	0	0.286956	0	0.620102	0	0	0	0	0	0.457664	0	0.479282	0	0	0	0	0	0	0	0	0	0	0.429836	0	0	0	0	0	0	0	0
chr1_246876037_246907758_-	ENSG00000153207.14	AHCTF1	chr1	246876037	246907758	-	ENST00000366508.5	24	5	0	0	0	0	0	0.217621	0	0	0	0	0	0	0	0	0	0	0	0	0	0	0	0	0	0	0	0	0	0	0	0	0	0	0	0	0	0	0	0	0	0
chr1_246876037_246900469_-	ENSG00000153207.14	AHCTF1	chr1	246876037	246900469	-	ENST00000366508.5	24	9	0	0	0	0	0	0	0	0	0	0	0	0	0	0	0	0	0	0	0	0	0	0	0	0	0.583509	0	0	0	0	0	0	0	0	0	0	0	0	0	0	0
chr1_246876037_246895925_-	ENSG00000153207.14	AHCTF1	chr1	246876037	246895925	-	ENST00000366508.5	24	13	0	0.306634	0	0	0	0	0	0	0	0	0	0	0	0	0	0	0	0	0	0	0	0	0	0	0	0	0	0	0	0	0	0	0	0	0	0	0	0	0	0
chr1_246876037_246888517_-	ENSG00000153207.14	AHCTF1	chr1	246876037	246888517	-	ENST00000366508.5	24	18	0	0	0	0	0	1.03383	0	0.691278	0	0	0	0.24094	0.345927	0	0	0.302829	0	0.422015	0	0	0.479282	0	0	0	0	0	0	0	0	0.280616	0	0	0	0	0	0	0	0	0	0
chr1_246876037_246885680_-	ENSG00000153207.14	AHCTF1	chr1	246876037	246885680	-	ENST00000366508.5	24	21	0	0	0	0	0	0	0	0	0	0	0	0	0	0	0	0	0	0	0	0	0	0	0	0	0	0	0	0	0	0	0	0	0	0	0	0	0	0	0.359576	0
chr1_246876037_246877302_-	ENSG00000153207.14	AHCTF1	chr1	246876037	246877302	-	ENST00000366508.5	24	22	0.805354	0.406923	0	0.604644	0	2.07639	0	0.735799	0.267055	0	0.503213	0.878836	0.691854	0.916812	0.724757	0.332188	0	0.584363	0	0.78096	0.234719	0.680729	0.331496	1.00834	1.85972	0.432484	1.88684	2.04631	0.892968	0.229511	0.838668	1.11261	1.15024	1.05281	0	2.12799	0.560161	0.183442	3.00759	0.364473
chr1_246876037_246877081_-	ENSG00000153207.14	AHCTF1	chr1	246876037	246877081	-	ENST00000366508.5	24	23	0	0	0	0	0	0	0	0	0	0	0	0	0	0	0	0	0	0	0	0	0	0	0	0	0	0	0	0	0	0	0	0	0	0	0	0	0	0	0.359576	0
chr1_246867661_246890059_-	ENSG00000153207.14	AHCTF1	chr1	246867661	246890059	-	ENST00000366508.5	25	17	0	0	0	0	0	0	0	0	0	0	0	0	0	0	0	0	0	0	0	0	0	0	0	0	0	0	0	0	0	0	0	0	0	0	0	0	0	0	0.567498	0
chr1_246863924_246867811_-	ENSG00000153207.14	AHCTF1	chr1	246863924	246867811	-	ENST00000366508.5	27	25	0	0	0	0	0	0	0	0	0	0	0	0	0	0	0.559125	0	0	0	0	0	0	0	0	0	0	0	0	0	0	0	0	0	0.225925	0	0	0	0.267418	0	0	0
chr1_246861959_246864116_-	ENSG00000153207.14	AHCTF1	chr1	246861959	246864116	-	ENST00000366508.5	28	27	0	0	0	0	0	0	0	0	0	0	0	0.438693	0	0	0	0	0	0	0	0	0	0	0	0	0	0	0	0	0	0	0	0	0	0	0	0	0	0	0	0
chr1_246860899_246918377_-	ENSG00000153207.14	AHCTF1	chr1	246860899	246918377	-	ENST00000366508.5	29	2	0	0	0	0	0	0	0	0	0	0	0	0	0	0	0	0	0	0	0	0	0	0	0	0	0	0	0	0	0	0	0	0.505871	0	0	0	0	0	0	0	0
chr1_246860899_246888517_-	ENSG00000153207.14	AHCTF1	chr1	246860899	246888517	-	ENST00000366508.5	29	18	0	0	0	0	0	0	0	0	0	0	0	0	0	0	0	0	0	0	0	0	0	0	0.276394	0	0	0	0	0	0	0	0	0	0	0	0	0.216034	0	0	0	0
chr1_246860899_246885680_-	ENSG00000153207.14	AHCTF1	chr1	246860899	246885680	-	ENST00000366508.5	29	21	0	0	0	0	0	0	0	0	0	0	0	0	0	0	0	0	0	0	0	0	0	0	0	0	0	0	0	0	0	0	0	0	0	0	0	0	0	0	0	0
chr1_246860899_246877302_-	ENSG00000153207.14	AHCTF1	chr1	246860899	246877302	-	ENST00000366508.5	29	22	0	0	0	0	0	0	0	0	0	0	0	0	0	0	0	0	0	0	0	0	0	0	0	0	0	0	0	0.176584	0	0	0	0	0	0	0	0	0	0	0	0
chr1_246860899_246867811_-	ENSG00000153207.14	AHCTF1	chr1	246860899	246867811	-	ENST00000366508.5	29	25	0	0	0	0	0	0	0	0	0	0	0	0	0	0	0	0	0	0.422015	0	0	0	0	0	0	0	0	0	0	0	0	0	0	0	0	0	0	0	0	0	0
chr1_246860899_246864116_-	ENSG00000153207.14	AHCTF1	chr1	246860899	246864116	-	ENST00000366508.5	29	27	0	0	0	0	0	0	0	0.276959	0	0	0	0	0	0	0	0	0.263939	0	0	0	0	0	0	0	0	0	0	0	0	0	0	0	0	0	0	0	0	0	0	0
chr1_246857691_246918377_-	ENSG00000153207.14	AHCTF1	chr1	246857691	246918377	-	ENST00000366508.5	30	2	0	0	0	0	0	0	0	0	0	0	0	0	0	0	0	0	0	0	0	0	0	0	0	0	0	0	0	0	0	0	0	0	0	0	0	0	0	0	0	0
chr1_246857691_246864116_-	ENSG00000153207.14	AHCTF1	chr1	246857691	246864116	-	ENST00000366508.5	30	27	0	0	0	0	0	0	0	0	0	0	0	0	0	0	0	0	0	0	0	0	0	0.246697	0	0	0	0	0	0	0	0	0	0	0	0	0	0	0	0	0	0
chr1_246855730_246888517_-	ENSG00000153207.14	AHCTF1	chr1	246855730	246888517	-	ENST00000366508.5	31	18	0	0	0	0	0	0	0	0	0	0	0	0	0	0	0	0	0	0.292181	0	0	0	0	0	0	0	0	0	0	0	0	0	0	0	0	0	0	0	0	0	0
chr1_246855730_246857814_-	ENSG00000153207.14	AHCTF1	chr1	246855730	246857814	-	ENST00000366508.5	31	30	0	0	0	0	0	0	0	0	0	0	0	0	0	0	0	0	0	0	0	0	0	0	0	0	0	0	0	0	0	0.250246	0	0	0	0	0	0	0	0	0	0
chr1_246853091_246918377_-	ENSG00000153207.14	AHCTF1	chr1	246853091	246918377	-	ENST00000366508.5	32	2	0	0	0	0	0	0	0	0	0	0	0	0	0	0	0	0	0	0	0	0	0	0	0	0	0	0	0	0	0	0	0	0	0	0	0	0	0	0.183442	0	0
chr1_246853091_246888517_-	ENSG00000153207.14	AHCTF1	chr1	246853091	246888517	-	ENST00000366508.5	32	18	0	0	0	0	0	0	0	0	0	0	0	0.24094	0	0	0	0	0	0	0	0	0	0	0	0	0	0	0	0	0	0	0	0	0	0	0	0	0	0	0	0
chr1_246853091_246877302_-	ENSG00000153207.14	AHCTF1	chr1	246853091	246877302	-	ENST00000366508.5	32	22	0	0	0	0	0	0	0	0	0	0	0	0	0	0	0	0	0	0	0.291262	0	0	0	0	0	0	0	0.297039	0	0	0	0	0	0	0	0	0.355187	0	0	0	0
chr1_246853091_246862153_-	ENSG00000153207.14	AHCTF1	chr1	246853091	246862153	-	ENST00000366508.5	32	28	0	0.343846	0	0	0	0	0	0	0	0	0	0	0	0	0	0	0	0	0	0	0	0	0	0	0	0	0	0	0	0	0	0	0	0	0	0	0	0	0	0
chr1_246849615_246918377_-	ENSG00000153207.14	AHCTF1	chr1	246849615	246918377	-	ENST00000366508.5	33	2	0	0	0	0	0.401187	0	0	0	0	0	0	0	0	0	0	0	0	0	0	0	0	0	0	0	0	0	0	0	0	0	0	0	0	0	0	0	0	0	0	0
chr1_246849615_246867811_-	ENSG00000153207.14	AHCTF1	chr1	246849615	246867811	-	ENST00000366508.5	33	25	0.483388	0	0	0	0	0	0	0	0	0	0	0	0	0	0	0	0	0	0	0	0	0	0	0	0	0	0.298068	0	0	0	0	0	0	0	0	0	0	0	0	0
chr1_246849615_246864116_-	ENSG00000153207.14	AHCTF1	chr1	246849615	246864116	-	ENST00000366508.5	33	27	0	0	0	0	0	0	0	0	0	0	0	0	0	0	0	0	0	0	0	0	0	0	0	0	0	0	0	0	0	0	0	0	0	0	0	0	0	0	0	0
chr1_246849615_246857814_-	ENSG00000153207.14	AHCTF1	chr1	246849615	246857814	-	ENST00000366508.5	33	30	0	0	0	0	0	0	0	0	0	0	0	0	0	0	0	0	0	0	0	0	0	0	0	0	0	0	0	0	0	0	0	0	0	0	0	0	0.447303	0	0	0
chr1_246849615_246855827_-	ENSG00000153207.14	AHCTF1	chr1	246849615	246855827	-	ENST00000366508.5	33	31	0	0	0	0	0	0	0	0	0	0	0	0	0	0	0	0	0	0	0	0	0	0	0.276394	0	0	0	0	0	0	0	0	0	0	0	0	0	0	0	0	0
chr1_246849615_246853299_-	ENSG00000153207.14	AHCTF1	chr1	246849615	246853299	-	ENST00000366508.5	33	32	0	0	0	0	0	0	0	0	0	0	0	0	0	0	0	0	0	0	0	0	0	0	0	0	0	0	0	0	0	0	0	0	0	0	0	0	0	0	0	0
chr1_246849615_246851442_-	ENSG00000153207.14	AHCTF1	chr1	246849615	246851442	-	ENST00000366508.5	33	33	0.263777	0	0.406021	0	0	0.692129	0	0.22942	0.594723	0	0	0	0	0	0	0	0	0.84403	0.22612	0	0	0	0	0	0	0.468839	0	0	0	0	0	0	0	0	0	0.4432	0	0	0.344189	0
chr1_246843795_246851442_-	ENSG00000153207.14	AHCTF1	chr1	246843795	246851442	-	ENST00000366508.5	34	33	0	0	0	0	0	0	0	0	0	0	0	0	0	0	0	0	0	0	0	0	0	0	0	0	0	0	0	0	0	0	0	0	0	0	0.27011	0	0	0	0	0
chr1_246842694_246867811_-	ENSG00000153207.14	AHCTF1	chr1	246842694	246867811	-	ENST00000366508.5	35	25	0.270788	0	0	0	0	0	0	0	0	0	0	0	0	0	0	0	0	0	0	0	0	0	0	0	0	0	0	0	0	0	0	0	0	0	0	0	0	0	0	0
chr1_246842694_246843928_-	ENSG00000153207.14	AHCTF1	chr1	246842694	246843928	-	ENST00000366508.5	35	34	0	0	0	0	0	0	0	0	0	0	0	0	0	0	0	0	0	0	0	0.228857	0	0	0	0	0	0	0	0.3276	0	0	0	0.298654	0	0	0	0	0	0	0	0
chr1_246865255_246867811_-	ENSG00000153207.14	AHCTF1	chr1	246865255	246867811	-	ENST00000470300.5	17	15	0	0	0	0	0	0	0	0	0	0	0	0	0.345927	0	0	0	0	0	0	0	0	0	0	0	0	0	0	0	0	0	0	0	0	0	0	0	0	0	0	0
chr1_110009034_110011357_+	ENSG00000168710.17	AHCYL1	chr1	110009034	110011357	+	ENST00000369799.9	2	3	0	0	0	0	0	0	0	0	0	0	0	0	0	0	0	0	0	0	0	0	0	0	0	0	0	0	0	0	0	0	0	0	0	0	0	0	0	0	0.688377	0
chr1_110009034_110012999_+	ENSG00000168710.17	AHCYL1	chr1	110009034	110012999	+	ENST00000369799.9	2	5	0	0	0	0	0	0	0	0	0	0	0	0	0	0	0	0	0	0	0	0	0	0	0	0	0	0	0	0	0	0.229511	0	0	0	0	0	0	0.267418	0	0	0
chr1_110009034_110014857_+	ENSG00000168710.17	AHCYL1	chr1	110009034	110014857	+	ENST00000369799.9	2	6	0	0	0	0	0	0	0	0	0	0	0	0	0	0.336626	0	0	0	0	0.22612	0	0	0	0	0	0	0	0	0	0	0	0	0	0	0	0	0	0	0	0	0
chr1_110009034_110017583_+	ENSG00000168710.17	AHCYL1	chr1	110009034	110017583	+	ENST00000369799.9	2	10	0	0	0	0	0	0	0	0	0	0	0	0	0	0	0	0.332188	0	0	0.228832	0	0	0	0	0	0	0	0	0	0	0	0	0	0	0	0	0	0	0	0	0
chr1_110009034_110018467_+	ENSG00000168710.17	AHCYL1	chr1	110009034	110018467	+	ENST00000369799.9	2	12	0	0	0	0	0	0	0	0	0.267055	0	0	0	0	0	0	0	0	0	0	0	0	0	0	0	0	0	0	0	0	0.280616	0	0	0	0	0	0	0	0	0	0.506118
chr1_110009034_110019626_+	ENSG00000168710.17	AHCYL1	chr1	110009034	110019626	+	ENST00000369799.9	2	15	0	0	0	0	0	0	0	0	0	0	0	0	0	0	0	0.582502	0	0	0	0	0	0	0	0	0	0	0	0	0	0	0	0	0	0	0	0	0	0	0	0
chr1_110009034_110020851_+	ENSG00000168710.17	AHCYL1	chr1	110009034	110020851	+	ENST00000369799.9	2	16	0	0	0	0	0	0	0	0	0	0	0	0	0	0	0	0	0	0	0	0	0	0	0	0	0	0	0	0	0.352232	0	0	0	0	0	0	0	0	0	0	0
chr1_110011214_110012999_+	ENSG00000168710.17	AHCYL1	chr1	110011214	110012999	+	ENST00000369799.9	3	5	0	0	0	0	0.311608	0	0	0	0	0	0	0	0	0	0	0	0	0	0	0	0	0	0	0	0	0	0	0	0	0	0	0	0	0	0	0	0	0	0	0
chr1_110012362_110016460_+	ENSG00000168710.17	AHCYL1	chr1	110012362	110016460	+	ENST00000369799.9	4	8	0	0	0	0	0	0	0	0	0	0	0	0	0	0	0	0	0	0	0	0	0	0	0	0	0	0	0	0	0	0.280616	0	0	0	0	0	0	0	0	0	0
chr1_110012362_110019626_+	ENSG00000168710.17	AHCYL1	chr1	110012362	110019626	+	ENST00000369799.9	4	15	0	0	0	0	0	0	0	0.735799	0	0	0	0	0	0	0	0	0	0	0	0	0	0	0	0	0	0	0	0	0	0	0	0	0	0	0	0	0	0	0	0
chr1_110016344_110019119_+	ENSG00000168710.17	AHCYL1	chr1	110016344	110019119	+	ENST00000369799.9	8	14	0	0	0	0	0	0	0	0	0	0	0	0	0	0.186709	0	0	0	0	0	0	0	0	0	0	0	0	0	0	0	0	0	0	0	0	0	0	0	0	0	0
chr1_110017946_110018467_+	ENSG00000168710.17	AHCYL1	chr1	110017946	110018467	+	ENST00000369799.9	11	12	0	0	0	0	0	0	0	0	0	0	0	0	0	0	0	0	0	0	0	0	0	0	0	0	0	0	0	0	0	0	0	0	0	0	0	0	0	0	0	0
chr1_27558706_27603491_-	ENSG00000126705.14	AHDC1	chr1	27558706	27603491	-	ENST00000642245.1	4	3	0	0	0	0	0	0	0	0	0	0	0	0	0	0	0	0	0	0	0	0	0	0	0	0	0	0	0	0	0	0	0	0	0	0	0	0	0	0	0	0
chr1_27558305_27603491_-	ENSG00000126705.14	AHDC1	chr1	27558305	27603491	-	ENST00000642245.1	5	3	0	0	0	0	0	0	0	0	0	0	0	0	0	0	0	0	0	0.422015	0	0	0	0	0	0.424084	0	0	0	0	0	0	0	0	0	0	0	0	0	0	0.344189	0
chr1_27558305_27558883_-	ENSG00000126705.14	AHDC1	chr1	27558305	27558883	-	ENST00000642245.1	5	4	0	0	0	0	0	0	0	0	0	0	0	0	0	0	0	0	0	0	0	0	0	0	0	0	0	0	0	0	0	0	0	0	0	0	0.718189	0	0	0	0.344189	0
chr1_27553074_27603491_-	ENSG00000126705.14	AHDC1	chr1	27553074	27603491	-	ENST00000642245.1	6	3	0	0	0	0	0	0	0	0	0	0	0	0	0	0	0	0	0	0	0	0	0	0	0	0	0	0	0	0	0	0	0	0	0	0	0	0	0	0	0.344189	0
chr1_27552892_27603491_-	ENSG00000126705.14	AHDC1	chr1	27552892	27603491	-	ENST00000642245.1	7	3	0	0	0	0	0	0	0	0	0	0	0	0	0	0	0	0	0	0	0	0	0	0	0	0	0	0	0	0	0	0	0	0	0	0	0	0	0	0	1.39214	0
chr1_27552892_27558883_-	ENSG00000126705.14	AHDC1	chr1	27552892	27558883	-	ENST00000642245.1	7	4	0	0	0.494341	0	0	0	0	0	0	0	0	0	0	0	0	0	0	0	0	0	0	0	0	0	0	0	0	0	0	0	0	0	0	0	0	0	0	0	0	0
chr1_27547261_27553185_-	ENSG00000126705.14	AHDC1	chr1	27547261	27553185	-	ENST00000642245.1	8	6	0	0	0	0	0	0.217621	0	0	0	0	0	0	0	0	0	0	0	0	0	0	0	0	0	0	0	0	0	0	0	0	0	0	0	0	0	0	0	0	0	0
chr1_27558305_27603494_-	ENSG00000126705.14	AHDC1	chr1	27558305	27603494	-	ENST00000643219.1	4	2	0	0	0	0	0	0	0	0	0	0	0	0	0	0	0	0	0	0	0	0	0	0	0	0	0	0	0	0	0	0	0	0	0	0	0	0	0	0	0	0
chr1_222686930_222703217_-	ENSG00000186063.12	AIDA	chr1	222686930	222703217	-	ENST00000340020.10	6	2	0.263777	0	0	0.604644	0.224177	0	0	0	0	0	0.251606	0	0	0.187263	0	0	0	0	0.228832	0	0	0	0	0	0	0	0	0.3276	0	0	0	0	0	0	0	0	0.292743	0	0.344189	0
chr1_222686930_222711545_-	ENSG00000186063.12	AIDA	chr1	222686930	222711545	-	ENST00000470437.5	7	2	0	0	0	0	0	0	0	0	0	0	0	0	0	0	0	0	0	0	0	0	0	0	0	0	0	0	0	0	0	0	0	0	0	0	0	0	0	0	0	0
chr1_159065910_159068701_-	ENSG00000163568.14	AIM2	chr1	159065910	159068701	-	ENST00000368130.8	4	3	0	0	0	0	0	0	0	0.276959	0	0	0	0	0	0	0	0	0	0	0	0	0	0	0	0	0	0	0	0	0	0	0	0	0	0	0	0	0	0	0	0
chr1_4711900_4712699_+	ENSG00000196581.10	AJAP1	chr1	4711900	4712699	+	ENST00000378190.7	2	2	0	0	0	0	0	0	0	0	0	0	0	0	0	0	0	0	2.71785	0	0	0	3.96647	0	0	0	0	0	0	0	0	0	0	0	0	0	0	4.57881	0	0.338014	0	0
chr1_33021367_33024567_-	ENSG00000004455.16	AK2	chr1	33021367	33024567	-	ENST00000467905.5	4	2	0	0	0	0	0	0	0	0	0	0	0	0	0	0	0	0	0	0	0	0	0	0	0	0	0	0	0	0	0	0	0	0	0	0	0	0	0	0	0.719152	0
chr1_33021367_33021703_-	ENSG00000004455.16	AK2	chr1	33021367	33021703	-	ENST00000467905.5	4	3	0	0	0	0	0	0	0	0	0	0	0	0	0	0	0	0	0	0	0	0	0	0	0	0	0	0	0	0	0	0	0	0	0	0	0	0	0	0	0.344189	0
chr1_33013207_33014594_-	ENSG00000004455.16	AK2	chr1	33013207	33014594	-	ENST00000467905.5	6	5	0	0.406923	0.326655	0	0	0	0	0	0.801166	0	0	0.481881	0	0.336626	1.11825	0	0.547492	0	1.04019	0.276051	0	0	0.587232	0.292128	0	0	0	0	0	0	0	0	0.88059	0.340425	0.239396	0	0	0.338014	0	0
chr1_65190710_65190829_+	ENSG00000162433.14	AK4	chr1	65190710	65190829	+	ENST00000497030.5	3	3	0	0	0	0	0	0	0	0	0	0	0	0	0	0	0	0	0	0	0	0	0	0	0	0	0	0	0	0	0	0	0	0	0	0	0	0	0	0	0	0
chr1_65190710_65224870_+	ENSG00000162433.14	AK4	chr1	65190710	65224870	+	ENST00000497030.5	3	5	0	0	0	0	0	0	0	0	0	0	0	0	0	0	0	0	0	0	0	0	0	0	0	0	0	0	0	0	0	0	0	0	0	0	0	0	0	0	0	0
chr1_77286941_77297947_+	ENSG00000154027.18	AK5	chr1	77286941	77297947	+	ENST00000354567.6	2	5	0	0	0	0	0	0	0	0	0	0	0	0	0	0	0	0.332188	0	0	0	0	0	0	0	0	0	0	0.298068	0	0	0	0	0	0	0.188509	0	0	0	0	0	0
chr1_77286941_77340568_+	ENSG00000154027.18	AK5	chr1	77286941	77340568	+	ENST00000354567.6	2	6	0	0	0	0	0	0	0	0	0	0	0	0	0	0	0	0	0	0	0	0	0	0.187335	0	0	0	0	0	0	0	0	0	0	0	0	0	0	0	0	0	0
chr1_77518564_77521943_+	ENSG00000154027.18	AK5	chr1	77518564	77521943	+	ENST00000354567.6	11	12	0	0	0	0	0	0	0	0	0	0	0	0	0	0	0	0	0	0	0	0	0	0	0	0	0	0	0	0	0	0	0	0	0	0	0	0	0	0	0	0
chr1_38998171_39001106_+	ENSG00000174574.15	AKIRIN1	chr1	38998171	39001106	+	ENST00000432648.7	2	3	0	0.306634	0	0	0.934823	0	0.216125	0	0	0	0.800889	0	0	0	0.241586	0.291251	0.35381	0	0.520094	0.252769	0.524088	0	0	0.292128	0	0	0	0	0.704464	0	0	0.298654	0	0	0	0	0	0	0	0
chr1_38998171_39003418_+	ENSG00000174574.15	AKIRIN1	chr1	38998171	39003418	+	ENST00000432648.7	2	4	0	0	0	0	0	0	0	0	0	0	0	0	0	0	0	0	0	0	0	0	0	0	0	0	0	0	0	0	0	0	0	0	0	0	0	0	0	0	0	0
chr1_39000972_39003418_+	ENSG00000174574.15	AKIRIN1	chr1	39000972	39003418	+	ENST00000432648.7	3	4	0	0	0	0.604644	0	0	0	0	0	0	0	0	0	0	0	0	0	0	0	0	0	0	0	0	0	0	0	0	0	0	0	0	0	0	0	0	0	0	0	0
chr1_45552436_45561878_+	ENSG00000117448.13	AKR1A1	chr1	45552436	45561878	+	ENST00000372070.7	2	3	0	0	0	0	0	0	0	0	0.267055	0	0	0	0	0	0	0	0	0	0	0.228857	0	0	0	0	0	0	0	0	0	0	0	0	0	0	0	0	0	0	0	0
chr1_45561789_45566688_+	ENSG00000117448.13	AKR1A1	chr1	45561789	45566688	+	ENST00000372070.7	3	4	0	0	0	0	0	0	0	0	0	0	0	0	0	0.168313	0	0	0	0	0	0	0	0	0	0	0	0	0	0	0	0	0	0.252936	0	0	0	0	0	0	0	0
chr1_45561789_45567020_+	ENSG00000117448.13	AKR1A1	chr1	45561789	45567020	+	ENST00000372070.7	3	5	0.270788	0	0	0	0	0	0	0	0	0	0	0	0	0	0	0	0	0	0	0	0	0	0	0	0	0	0	0	0	0	0	0	0	0	0	0	0	0	0	0
chr1_45566569_45567020_+	ENSG00000117448.13	AKR1A1	chr1	45566569	45567020	+	ENST00000372070.7	4	5	1.49433	1.68202	0.653311	1.20929	1.65667	0	0.536854	1.05806	1.06822	0.629299	3.64254	0.24094	0	0.187263	0.874983	3.12257	3.21785	1.68806	5.06252	0.504909	1.00337	1.03956	0.552789	1.6713	0.692705	2.66718	1.09297	0	0	0.479757	2.48171	1.19462	0.610937	1.23627	0	0.864135	4.46973	4.13877	0	0
chr1_19307314_19308262_-	ENSG00000053371.12	AKR7A2	chr1	19307314	19308262	-	ENST00000235835.7	4	3	0	0	0	0	0	0	0	0	0	0	0	0	0	0	0	0	0	0	0	0	0	0.246697	0	0	0	0	0	0	0	0	0	0	0	0	0	0	0	0	0	0
chr1_19306018_19308642_-	ENSG00000053371.12	AKR7A2	chr1	19306018	19308642	-	ENST00000235835.7	6	2	0	0	0	0	0	0	0	0	0	0	0	0	0	0	0	0	0.263939	0	0.22612	0	0	0	0	0	0	0	0	0	0	0	0	0	0.269653	0	0	0	0	0	0	0
chr1_19283996_19286372_-	ENSG00000162482.4	AKR7A3	chr1	19283996	19286372	-	ENST00000361640.4	6	2	0	0	0	0	0	0	0	0	0	0	0	0	0	0	0	0	0	0	0.228832	0	0	0	0	0	0	0	0	0	0	0	0	0	0	0	0	0	0	0	0	0
chr1_243843125_243843282_-	ENSG00000117020.16	AKT3	chr1	243843125	243843282	-	ENST00000263826.9	1	1	0	0	0	0	0	0	0	0	0	0	0	0	0	0	0	0	0	0	0	0	0	0	0	0	0	0	0	0	0	0	0	0	0	0	0	0	0	0	0	0
chr1_243695591_243843282_-	ENSG00000117020.16	AKT3	chr1	243695591	243843282	-	ENST00000263826.9	2	1	0.995871	0.613268	0.988682	4.97407	0.224177	0.731394	0	0.276959	0.281873	0	0.286956	0.481881	0	0.168313	0	0.332188	0.35381	0	0	0	0.966201	0.886002	0	0.292128	1.16702	0.937678	0.496832	0	0	0	0.279556	0.935708	0	0	0.257402	0.432068	0	0	6.3185	0
chr1_243664772_243843282_-	ENSG00000117020.16	AKT3	chr1	243664772	243843282	-	ENST00000263826.9	3	1	0	0	0	0.604644	0	0	0	0	0	0	0	0	0	0	0	0	0	0	0	0	0	0.187335	0	0	1.38541	0	0	0	0	0	0	0	0	0	0	0	0	0	0	0
chr1_243645893_243843282_-	ENSG00000117020.16	AKT3	chr1	243645893	243843282	-	ENST00000263826.9	4	1	0.805354	0	0	0	0.311608	0.256886	0	0	0	0	0.503213	0	0	0	0	0	0	0	0	0	1.19328	0	0	0.424084	3.24513	0	0	0	0	0	0.279556	0.252936	0	0	0	0	0	0.16834	1.60006	0
chr1_243637611_243843282_-	ENSG00000117020.16	AKT3	chr1	243637611	243843282	-	ENST00000263826.9	5	1	3.41999	0	0	3.90171	0.672531	0.606096	0	0	0	0	0.790169	0	0	0	0	0.302829	0.527878	0	0	0	4.84221	0.910535	0.310838	0.876384	0.583509	0.322986	0.7949	0	0	0	0.279556	0.597308	0	0	0	0	0	0	2.3346	0
chr1_243613671_243843282_-	ENSG00000117020.16	AKT3	chr1	243613671	243843282	-	ENST00000263826.9	7	1	2.62971	2.99173	1.46535	2.48704	2.81567	1.46279	0	1.05806	0	0	0.286956	0.637895	0	0.187263	0	2.29596	1.2355	0	0	0	2.9631	4.82101	0	0.848167	1.38541	0.322986	1.78223	0.655199	1.4548	0	0.559112	3.52618	0	0.188509	0.478793	0	0.267418	0	3.71136	0
chr1_243572926_243843282_-	ENSG00000117020.16	AKT3	chr1	243572926	243843282	-	ENST00000263826.9	8	1	0	0	1.54472	2.41857	1.0244	0.606096	0	0	0	0	0.400444	0.559888	0	0	0.241586	0	0.35381	0	0.678359	0	0.524088	0.170444	0	2.86485	1.16702	0	0	0.504184	0	0	0.279556	0.505871	0	0	0.27011	0	0.292743	0	0.688377	0.364473
chr1_243563720_243843282_-	ENSG00000117020.16	AKT3	chr1	243563720	243843282	-	ENST00000263826.9	9	1	0.805354	0.713557	0.494341	4.30097	0.934823	0.731394	0	0	0.267055	1.12838	0.790169	0	0	0	0	0.885331	0	0	0	0	1.90728	0.621366	0	1.51431	1.16702	0.322986	1.09297	0	0.352232	0	0	0.505871	0	0	0.257402	0	0	0.183442	0	0.506118
chr1_243552729_243843282_-	ENSG00000117020.16	AKT3	chr1	243552729	243843282	-	ENST00000263826.9	10	1	0.505471	0	0.732677	0	0.984138	0.388474	0	0.828636	0	0	0	0	0	0	0	0	0.527878	0	0	0	0	0.680729	0	0.983305	0.583509	0	0.298068	0	0	0	0	0.252936	0	0	0	0	0	0	0.911687	0
chr1_243545510_243843282_-	ENSG00000117020.16	AKT3	chr1	243545510	243843282	-	ENST00000263826.9	11	1	4.91432	3.92874	1.1387	7.59803	3.07796	1.21219	0	0.553919	1.09786	1.67577	1.44222	0.438693	0	0	0	3.6232	1.06556	0	0	0	4.86054	3.87355	0.276394	2.30881	2.55243	0	2.08663	0.59448	0	0.229511	0.547682	7.45189	0	0	1.25841	0	0.292743	0.338014	6.50797	0
chr1_243512324_243843282_-	ENSG00000117020.16	AKT3	chr1	243512324	243843282	-	ENST00000263826.9	12	1	1.97772	0	0.812043	0.673104	0.672531	0.388474	0	0	0.861778	0	0	0	0	0	0	1.21752	0	0	0	0	0.262044	0.187335	0	1.40739	0.692705	0	0	0	0	0	0	0.682772	0	0	0	0	0	0	1.07873	0
chr1_243695591_243695716_-	ENSG00000117020.16	AKT3	chr1	243695591	243695716	-	ENST00000336199.9	2	2	0.270788	0	0	0	0.311608	0	0	0	0	0.547384	0	0	0	0	0	0	0	0	0	0	0	0	0	0	0	0	0	0.176584	0	0	0	0.429836	0	0	0.27011	0	0	0	0	0
chr1_243664772_243664883_-	ENSG00000117020.16	AKT3	chr1	243664772	243664883	-	ENST00000336199.9	3	3	0	0	0	0	0	0	0	0	0	0	0	0	0	0	0	0	0	0	0	0	0	0	0	0	0	0	0	0	0	0	0	0	0	0	0	0	0	0	0	0
chr1_243645893_243695716_-	ENSG00000117020.16	AKT3	chr1	243645893	243695716	-	ENST00000336199.9	4	2	0	0	0	0	0	0.256886	0	0	0	0	0	0	0	0	0	0.582502	0	0	0	0	0	0	0	0	0	0	0	0	0	0	0	0	0	0	0	0	0	0	0	0
chr1_243645893_243664883_-	ENSG00000117020.16	AKT3	chr1	243645893	243664883	-	ENST00000336199.9	4	3	0	0	0	0	0	0	0	0	0	0	0	0	0	0	0	0	0	0	0	0	0	0	0	0	0	0	0	0	0	0	0	0	0	0	0	0	0	0	0	0
chr1_243637611_243695716_-	ENSG00000117020.16	AKT3	chr1	243637611	243695716	-	ENST00000336199.9	5	2	0.791331	0	1.80968	2.01931	1.07157	0	0	0.22942	0.281873	0	0	0	0	0	0.559125	0.291251	0	0	0	0	1.76218	2.0269	0	1.69633	0	0	0.596137	0	0	0	0	0.505871	0	0	0	0	0	0	1.39214	0
chr1_243637611_243664883_-	ENSG00000117020.16	AKT3	chr1	243637611	243664883	-	ENST00000336199.9	5	3	0	0	0	0	0.224177	0.256886	0	0	0	0	0	0	0	0	0	0	0	0	0.22612	0	0.234719	0.511333	0	0.292128	0	0	0	0	0	0	0	0	0	0	0	0	0	0	0	0
chr1_243615096_243695716_-	ENSG00000117020.16	AKT3	chr1	243615096	243695716	-	ENST00000336199.9	6	2	0	0	0	0	0	0	0	0	0	0	0	0	0	0	0	0	0	0	0	0	0	0	0	0	0	0	0	0	0	0	0.279556	0	0	0	0	0	0	0	0	0
chr1_243613671_243695716_-	ENSG00000117020.16	AKT3	chr1	243613671	243695716	-	ENST00000336199.9	7	2	0.725083	1.22654	2.44508	2.01931	2.22796	0	0	0	0	0.581	0	0.438693	0	0	0	0	0	0	0	0	1.22825	0.511333	0	0	0.583509	0.322986	1.09297	0	0.297656	0	0	0.895961	0	0	0	0	0.292743	0	0.719152	0
chr1_243613671_243664883_-	ENSG00000117020.16	AKT3	chr1	243613671	243664883	-	ENST00000336199.9	7	3	0	0	0	0	0.224177	0	0	0	0	0	0	0	0	0	0	0	0	0	0	0	0	0.374669	0	0	0	0	0	0	0	0	0	0	0	0	0	0	0	0	0	0
chr1_243613671_243646037_-	ENSG00000117020.16	AKT3	chr1	243613671	243646037	-	ENST00000336199.9	7	4	0	0	0	0	0	0	0	0	0	0	0	0	0	0	0	0	0	0	0	0	0	0	0	0	0	0	0	0	0	0	0	0	0	0	0	0	0	0	0.344189	0
chr1_243613671_243637742_-	ENSG00000117020.16	AKT3	chr1	243613671	243637742	-	ENST00000336199.9	7	5	0.241694	0	2.29507	1.20929	1.42559	2.80657	0	0	0.281873	0	1.00643	0.318948	0	0.168313	0	0.908487	0.35381	0	0	0	3.15301	1.03956	0.552789	0.876384	0.692705	0	2.67968	0	0	0	0.559112	1.05746	0	0	0.779616	0	0	0	10.0914	0
chr1_243572926_243695716_-	ENSG00000117020.16	AKT3	chr1	243572926	243695716	-	ENST00000336199.9	8	2	0	0.343846	0	0	0.802374	0	0	0	0	0	0.573911	0	0	0	0	0.873753	0	0	0	0	0	0.187335	0	0	0	0	0	0	0	0	0	0	0	0	0	0	0	0	1.03257	0
chr1_243572926_243664883_-	ENSG00000117020.16	AKT3	chr1	243572926	243664883	-	ENST00000336199.9	8	3	0	0	0	0	0	0	0	0	0	0	0	0	0	0	0	0	0	0	0	0	0	0	0	0	0	0	0	0	0	0	0	0	0	0	0	0	0	0	0	0
chr1_243563720_243695716_-	ENSG00000117020.16	AKT3	chr1	243563720	243695716	-	ENST00000336199.9	9	2	0	0.306634	0	0	0.849541	0	0	0	0	0	0	0	0	0	0	0	0	0	0	0	0.262044	0	0	0	1.16702	0	0	0	0	0	0	0.252936	0	0	0	0	0	0	0	0
chr1_243563720_243664883_-	ENSG00000117020.16	AKT3	chr1	243563720	243664883	-	ENST00000336199.9	9	3	0	0	0	0	0	0	0	0	0	0	0	0	0	0	0	0	0	0	0	0	0	0	0	0	0	0	0	0	0	0	0	0.551589	0	0	0	0	0	0	0	0
chr1_243563720_243646037_-	ENSG00000117020.16	AKT3	chr1	243563720	243646037	-	ENST00000336199.9	9	4	0	0	0	0	0	0	0	0	0	0	0	0	0	0	0	0	0	0	0	0	0	0.246697	0	0	0	0	0	0	0	0	0	0	0	0	0	0	0	0	0	0
chr1_243563720_243637742_-	ENSG00000117020.16	AKT3	chr1	243563720	243637742	-	ENST00000336199.9	9	5	0	0	0	0	0	0	0	0	0	0	0	0	0	0	0	0	0.527878	0	0	0	0	0	0	0	0	0	0	0	0	0	0	0	0	0	0	0	0	0	0	0
chr1_243563720_243615161_-	ENSG00000117020.16	AKT3	chr1	243563720	243615161	-	ENST00000336199.9	9	6	0	0	0	0	0	0	0	0	0	0	0	0	0	0	0	0	0	0	0	0	0	0	0	0	0	0	0	0	0	0	0	0	0	0	0.257402	0	0	0	0	0
chr1_243563720_243573048_-	ENSG00000117020.16	AKT3	chr1	243563720	243573048	-	ENST00000336199.9	9	8	0	0	0	0	0.311608	0.256886	0	0	0	0	0	0	0	0	0	0	0	0	0	0	0	0.340888	0	0.292128	0	0	0	0	0	0	0	0.252936	0	0	0	0	0	0	0	0
chr1_243552729_243695716_-	ENSG00000117020.16	AKT3	chr1	243552729	243695716	-	ENST00000336199.9	10	2	0	0	0	0	0	0	0	0	0	0	0	0	0	0	0	0	0	0	0	0	0	0	0	0	0	0	0	0	0	0	0	0	0	0	0	0	0	0	0.359576	0
chr1_243552729_243664883_-	ENSG00000117020.16	AKT3	chr1	243552729	243664883	-	ENST00000336199.9	10	3	0	0	0	0	0	0	0	0	0	0	0	0	0	0	0	0	0	0	0	0	0	0	0	0	0	0	0	0	0	0	0	0	0	0	0	0	0	0	0	0
chr1_243552729_243646037_-	ENSG00000117020.16	AKT3	chr1	243552729	243646037	-	ENST00000336199.9	10	4	0	0	0	0.604644	0	0	0	0	0	0	0	0	0	0	0	0	0	0	0	0	0	0	0	0	0	0	0	0	0	0	0	0	0	0	0	0	0	0	0	0
chr1_243552729_243637742_-	ENSG00000117020.16	AKT3	chr1	243552729	243637742	-	ENST00000336199.9	10	5	0	0	0	0	0	0	0	0	0	0	0	0	0	0	0	0	0	0	0	0	0	0	0	0	0	0	0	0	0	0	0	0	0	0	0	0	0	0	0	0
chr1_243552729_243573048_-	ENSG00000117020.16	AKT3	chr1	243552729	243573048	-	ENST00000336199.9	10	8	0	0	0.406021	0	0	0.217621	0	0	0	0	0	0	0	0	0	0	0	0	0	0	0	0	0	0	0	0	0	0	0	0	0.279556	0	0	0	0	0	0	0	0	0
chr1_243552729_243552943_-	ENSG00000117020.16	AKT3	chr1	243552729	243552943	-	ENST00000336199.9	10	10	0	0	0	0	0	0	0	0	0	0	0	0	0	0	0	0	0.263939	0	0	0	0	0	0	0	0	0	0	0	0	0	0	0	0	0	0	0	0	0	0	0
chr1_243545510_243695716_-	ENSG00000117020.16	AKT3	chr1	243545510	243695716	-	ENST00000336199.9	11	2	2.79814	2.29529	0.326655	3.83324	2.85547	0.652864	0	0	0.53411	0	0.251606	0.24094	0	0	0	3.70507	0.35381	0	0	0	4.21103	1.98387	0.310838	4.11884	3.13594	0	1.18815	0	0	0	0.547682	4.07229	0	0	0.514804	0	0.267418	0	4.66921	0
chr1_243545510_243664883_-	ENSG00000117020.16	AKT3	chr1	243545510	243664883	-	ENST00000336199.9	11	3	0	0	0	0	0	0	0	0	0	0	0.286956	0	0	0	0	0	0.273746	0	0	0	0	0	0	0	0	0	0	0	0.352232	0	0	0	0	0	0	0	0	0	0	0
chr1_243545510_243637742_-	ENSG00000117020.16	AKT3	chr1	243545510	243637742	-	ENST00000336199.9	11	5	0	0	0	0	0.625364	0.256886	0	0	0	0	0	0	0	0	0	0.605658	0	0	0	0	0.262044	0	0	0	0.583509	0	0	0	0	0	0.279556	0	0	0	0	0	0	0	0.688377	0
chr1_243545510_243615161_-	ENSG00000117020.16	AKT3	chr1	243545510	243615161	-	ENST00000336199.9	11	6	0	0	0	0	0	0	0	0	0	0	0	0.318948	0	0	0	0	0	0	0	0	0	0.170444	0	0	0	0	0	0	0	0	0	0	0	0	0	0	0	0	0	0
chr1_243545510_243613739_-	ENSG00000117020.16	AKT3	chr1	243545510	243613739	-	ENST00000336199.9	11	7	0	0	0	0	0	0	0	0	0	0	0	0	0	0	0	0	0	0	0	0	0	0	0	0	0	0	0	0	0	0	0	0	0	0	0	0	0	0	0	0
chr1_243545510_243573048_-	ENSG00000117020.16	AKT3	chr1	243545510	243573048	-	ENST00000336199.9	11	8	1.27472	4.20951	5.14641	5.85256	11.7413	3.41266	0	0	1.33528	1.64215	3.7881	1.36072	0	0	0	4.97511	0.263939	0	0.452239	0	4.41842	2.04428	0.310838	3.21064	1.85972	0	6.84646	0	1.70658	0	1.38635	2.68191	0	0	0.239396	0.216034	0	0.338014	7.37878	0
chr1_243545510_243563848_-	ENSG00000117020.16	AKT3	chr1	243545510	243563848	-	ENST00000336199.9	11	9	0	0.687692	0	0	1.0244	0.435243	0	0	0.267055	0	0.251606	0.24094	0	0	0	0	0	0	0	0	0	0.681777	0	0.292128	0	0	0	0	0	0	0	0	0	0	0	0	0	0	0.719152	0
chr1_243545510_243552943_-	ENSG00000117020.16	AKT3	chr1	243545510	243552943	-	ENST00000336199.9	11	10	0	0	0	0.604644	0	0	0	0	0	0	0	0	0	0	0	0	0	0	0	0	0	0	0	0	0	0	0	0	0	0	0	0	0	0	0	0	0	0	0.344189	0
chr1_243512324_243695716_-	ENSG00000117020.16	AKT3	chr1	243512324	243695716	-	ENST00000336199.9	12	2	0	0	0	0	0	0	0	0	0	0	0	0.318948	0	0	0	0.59408	0	0	0	0	0	0	0	0	0	0	0	0	0	0	0	0	0	0	0	0	0	0	0	0
chr1_243512324_243664883_-	ENSG00000117020.16	AKT3	chr1	243512324	243664883	-	ENST00000336199.9	12	3	0	0	0	0	0	0	0	0	0	0	0	0	0	0	0	0.291251	0	0	0	0	0	0	0	0	0	0	0	0	0	0	0	0	0	0	0	0	0	0	0	0
chr1_243512324_243637742_-	ENSG00000117020.16	AKT3	chr1	243512324	243637742	-	ENST00000336199.9	12	5	0	0	0	0	0.311608	0	0	0	0	0	0	0	0	0	0	0	0	0	0	0	0	0	0	0	0	0	0	0	0	0	0	0	0	0	0	0	0	0	0	0
chr1_243512324_243615161_-	ENSG00000117020.16	AKT3	chr1	243512324	243615161	-	ENST00000336199.9	12	6	0	0	0	0	0	0	0	0	0	0	0.400444	0	0	0	0	0	0	0	0	0	0	0	0	0	0	0	0	0	0	0	0	0	0	0	0	0	0	0	0	0
chr1_243512324_243573048_-	ENSG00000117020.16	AKT3	chr1	243512324	243573048	-	ENST00000336199.9	12	8	0	0.613268	0	0	0.224177	0	0	0	0	0	0.400444	0	0	0	0	0.332188	0	0	0	0	0.234719	0.170444	0	0	1.85972	0	0	0	0	0	0	0.252936	0	0	0	0	0	0	1.07873	0
chr1_243512324_243563848_-	ENSG00000117020.16	AKT3	chr1	243512324	243563848	-	ENST00000336199.9	12	9	0	0	0	0	0	0	0	0	0	0	0	0	0	0	0	0	0	0	0	0	0.786132	0	0	0	0	0	0	0	0	0	0	0	0	0	0	0	0	0	0	0
chr1_243512324_243552943_-	ENSG00000117020.16	AKT3	chr1	243512324	243552943	-	ENST00000336199.9	12	10	0	0	0	0	0	0	0	0	0	0	0	0	0	0	0	0	0	0	0	0	0	0	0	0	0	0	0	0	0	0	0	0	0	0	0	0	0	0	0.344189	0
chr1_243499737_243573048_-	ENSG00000117020.16	AKT3	chr1	243499737	243573048	-	ENST00000336199.9	13	8	0	0	0	0	0	0	0	0	0	0	0	0	0	0	0	0	0	0	0	0	0	0	0	0	0	0	0	0	0	0	0	0	0	0	0	0	0	0	0	0
chr1_243695591_243735747_-	ENSG00000117020.16	AKT3	chr1	243695591	243735747	-	ENST00000490018.1	5	3	0.270788	0	0	0	0	0	0	0	0	0	0	0	0	0	0	0	0	0	0	0	0	0	0	0	0	0	0	0	0	0	0	0	0	0	0	0	0	0	0	0
chr1_243695591_243735116_-	ENSG00000117020.16	AKT3	chr1	243695591	243735116	-	ENST00000490018.1	5	4	0	0	0	0	0	0	0	0	0.281873	0	0	0	0	0	0	0	0	0	0	0	0	0	0	0	0	0	0	0	0	0	0	0	0	0	0	0	0	0	0	0
chr1_207815929_207817414_-	ENSG00000203709.11	AL035209.2	chr1	207815929	207817414	-	ENST00000637970.1	6	5	0.995871	0.406923	1.3947	0	1.33601	0.949016	0	0	0	0	0	1.7214	0	0	0	0.291251	0	0.584363	0.748926	0	0	0.374669	0	0	0	0	0	0	1.19062	0.479757	0.559112	0.935708	0	0.528934	0	0	0	0	0.344189	0
chr1_151998708_152010982_+	ENSG00000229021.2	AL591893.1	chr1	151998708	152010982	+	ENST00000432386.1	2	3	0	0	0	0	0	0	0	0	0	0	0	0	0	0	0	0	0	0	0	0	0	0	0	0	0	0	0	0	0	0	0	0	0	0.188509	0	0	0	0	0	0
chr1_151998708_152022509_+	ENSG00000229021.2	AL591893.1	chr1	151998708	152022509	+	ENST00000432386.1	2	12	0	0	0	0	0	0	0	0	0	0	0	0	0	0.187263	0.559125	0	0.273746	0	0	0	0	0	0	0	0	0	0	0	0.297656	0	0	0	0	0	0	0	0	0	0	0
chr1_152014023_152022509_+	ENSG00000229021.2	AL591893.1	chr1	152014023	152022509	+	ENST00000432386.1	4	12	0	0	0	0	0	0	0	0	0	0	0	0	0	0	0	0	0	0	0	0	0	0.170444	0	0	0	0	0	0	0	0	0	0	0	0	0	0	0	0	0	0
chr1_18883124_18890105_-	ENSG00000159423.16	ALDH4A1	chr1	18883124	18890105	-	ENST00000290597.9	7	2	0	0	0	0	0	0	0	0	0	0	0	0	0	0	0	0	0.263939	0	0	0	0	0	0	0	0	0	0	0	0	0	0	0	0	0	0	0	0	0	0	0
chr1_165695252_165695397_-	ENSG00000143149.12	ALDH9A1	chr1	165695252	165695397	-	ENST00000354775.4	2	2	0.483388	0	0	0	0	0	0	0	0	0	0	0	0	0	0	0	0	0	0	0	0	0	0	0	0	0	0	0	0	0	0	0	0	0	0	0	0	0	0	0
chr1_165682981_165695397_-	ENSG00000143149.12	ALDH9A1	chr1	165682981	165695397	-	ENST00000354775.4	3	2	0	0	0	0	0	0	0	0	0	0	0	0	0	0	0	0	0	0	0	0	0	0	0	0	0	0	0	0	0	0	0	0	0	0	0	0	0	0	0	0
chr1_165682107_165683110_-	ENSG00000143149.12	ALDH9A1	chr1	165682107	165683110	-	ENST00000354775.4	4	3	0	0	0	0	0	0	0	0.414318	0	0	0	0	0	0	0	0.605658	0	0	0	0	0	0	0	0	0	0	0	0	0	0	0	0	0	0	0	0	0.447303	0	0	0
chr1_165680487_165695397_-	ENSG00000143149.12	ALDH9A1	chr1	165680487	165695397	-	ENST00000354775.4	5	2	0	0	0	0	0	0	0	0	0	0	0	0	0	0	0	0	0	0	0	0	0	0	0	0.424084	0	0	0	0.3276	0	0	0	0	0	0	0	0.216034	0	0	0	0
chr1_165679442_165695397_-	ENSG00000143149.12	ALDH9A1	chr1	165679442	165695397	-	ENST00000354775.4	6	2	0	0	0	0	0	0	0	0	0	0	0	0	0	0	0	0	0	0	0.228832	0	0	0.374669	0.621676	0	0	0	0	0	0.595312	0	0	0	0	0	0	0.227166	0	0	0	0
chr1_165679442_165683110_-	ENSG00000143149.12	ALDH9A1	chr1	165679442	165683110	-	ENST00000354775.4	6	3	0.241694	0	0	0	0.535785	0	0	0	0	0	0	0	0	0	0.559125	0	0.821239	0.84403	0.22612	0	0.262044	0	0.662992	0.292128	0	0	1.39104	0.3276	0.561837	0	0.279556	0	0	0	0	0	0.267418	0	0.688377	0
chr1_165679442_165680683_-	ENSG00000143149.12	ALDH9A1	chr1	165679442	165680683	-	ENST00000354775.4	6	5	0	0	0	0	0	0	0	0	0	0	0	0	0	0	0	0	0	0	0	0	0	0	0	0	0	0	0	0	0	0	0	0	0	0	0	0	0	0	0	0
chr1_165668926_165695397_-	ENSG00000143149.12	ALDH9A1	chr1	165668926	165695397	-	ENST00000354775.4	8	2	0	0	0	0	0	0	0	0	0	0	0	0	0	0	0	0	0	0	0	0	0	0.340888	0	0	0	0	0	0	0	0	0	0	0	0	0	0	0	0	0	0
chr1_165668926_165683110_-	ENSG00000143149.12	ALDH9A1	chr1	165668926	165683110	-	ENST00000354775.4	8	3	0	0	0	0	0	0	0	0	0	0	0	0	0	0	0	0	0.821239	0	0	0	0	0	0	0	0	0	0	0	0	0	0	0	0	0	0	0	0	0	0	0
chr1_165668926_165680683_-	ENSG00000143149.12	ALDH9A1	chr1	165668926	165680683	-	ENST00000354775.4	8	5	0	0	0	0	0	0	0	0	0	0	0	0	0	0	0	0	0	0	0	0	0	0	0	0	0	0	0	0	0	0	0	0	0	0	0	0	0	0	0	0
chr1_165668926_165669450_-	ENSG00000143149.12	ALDH9A1	chr1	165668926	165669450	-	ENST00000354775.4	8	7	0	0	0	0	0	0	0	0	0	0	0	0	0	0	0	0	0	0	0	0	0	0	0	0	0	0	0	0	0	0	0	0	0	0.188509	0	0	0	0	0	0
chr1_165667309_165683110_-	ENSG00000143149.12	ALDH9A1	chr1	165667309	165683110	-	ENST00000354775.4	9	3	0	0	0	0	0	0.217621	0	0	0	0	0	0	0	0	0	0	0	0	0	0	0	0.246697	0	0	0	0	0	0	0	0	0	0	0	0	0	0	0	0	0	0
chr1_165665018_165683110_-	ENSG00000143149.12	ALDH9A1	chr1	165665018	165683110	-	ENST00000354775.4	10	3	0	0	0	0	0	0	0	0	0	0	0	0	0	0	0	0	0	0	0	0	0	0	0	0	0	0	0	0	0	0	0	0	0	0	0	0	0	0	0	0
chr1_63370771_63402343_+	ENSG00000088035.15	ALG6	chr1	63370771	63402343	+	ENST00000371108.8	2	4	0	0	0	0	0	0	0	0	0	0	0	0	0	0	0	0	0	0	0.452239	0	0	0	0	0	0	0	0	0	0	0	0	0	0	0	0	0	0	0	0	0
chr1_63370771_63412061_+	ENSG00000088035.15	ALG6	chr1	63370771	63412061	+	ENST00000371108.8	2	9	0	0	0	0	0	0	0	0	0	0	0	0	0	0	0	0.332188	0	0	0	0	0	0	0	0	0	0	0	0	0	0	0	0	0	0	0	0	0	0	0	0
chr1_63370771_63414146_+	ENSG00000088035.15	ALG6	chr1	63370771	63414146	+	ENST00000371108.8	2	10	0	0	0	0	0	0	0	0	0	0	0	0	0	0	0	0	0	0	0	0	0	0	0	0	0	0	0	0	0	0	0	0	0	0	0	0	0	0.16834	0	0
chr1_63402254_63406399_+	ENSG00000088035.15	ALG6	chr1	63402254	63406399	+	ENST00000371108.8	4	6	0	0	0	0	0	0	0	0	0	0	0	0	0	0	0	0	0	0	0	0	0	0	0	0.292128	0	0	0	0	0	0	0	0	0	0	0	0	0	0	0	0
chr1_63402254_63412061_+	ENSG00000088035.15	ALG6	chr1	63402254	63412061	+	ENST00000371108.8	4	9	0	0	0	0	0	0	0	0	0	0	0.400444	0	0	0	0	0	0	0	0	0	0	0	0	0	0	0	0	0	0	0	0	0	0	0	0	0	0	0	0.688377	0
chr1_63402254_63419440_+	ENSG00000088035.15	ALG6	chr1	63402254	63419440	+	ENST00000371108.8	4	12	0	0	0	0	0	0	0	0	0	0	0	0	0	0	0	0	0	0	0	0	0	0	0	0	0	0	0	0	0	0	0	0	0	0	0	0	0	0	0	0
chr1_63402254_63429126_+	ENSG00000088035.15	ALG6	chr1	63402254	63429126	+	ENST00000371108.8	4	14	0	0	0	0	0	0	0	0.276959	0	0	0	0	0	0	0	0	0	0	0	0	0	0	0	0	0	0	0	0	0	0	0	0	0	0	0	0	0	0	0	0
chr1_63404453_63415957_+	ENSG00000088035.15	ALG6	chr1	63404453	63415957	+	ENST00000371108.8	5	11	0	0	0	0	0	0	0	0	0	0	0	0	0	0	0	0	0	0	0	0	0	0	0	0	0	0	0	0	0	0	0	0	0	0	0	0	0	0	0	0
chr1_63404453_63419440_+	ENSG00000088035.15	ALG6	chr1	63404453	63419440	+	ENST00000371108.8	5	12	0	0	0	0	0	0	0	0	0	0	0	0	0	0	0	0	0	0.422015	0	0	0	0	0	0	0	0	0	0	0	0	0	0	0	0	0	0	0	0	0	0
chr1_63411926_63415957_+	ENSG00000088035.15	ALG6	chr1	63411926	63415957	+	ENST00000371108.8	9	11	0	0	0	0	0	0	0	0	0	0	0	0	0	0	0	0	0	0	0	0	0	0	0	0	0	0	0	0	0	0	0	0	0	0.261939	0	0	0	0	0	0
chr1_63411926_63419440_+	ENSG00000088035.15	ALG6	chr1	63411926	63419440	+	ENST00000371108.8	9	12	0	0	0	0	0	0	0.216125	0	0	0	0.251606	0	0.285577	0	0	0	0	0	0	0	0	0	0	0	0	0	0	0	0	0	0	0	0.903702	0	0	0	0	0.183442	0	0
chr1_63411926_63428801_+	ENSG00000088035.15	ALG6	chr1	63411926	63428801	+	ENST00000371108.8	9	13	0	0.306634	0	0	1.34506	0	0	0	0.563747	0	0.400444	0	0	0	1.28388	0	0	0	0.22612	0	0	0	0.276394	0	0	0	0	0	0	0	0	0	0	0.188509	0	0	0	0.676028	1.37675	0
chr1_63411926_63429126_+	ENSG00000088035.15	ALG6	chr1	63411926	63429126	+	ENST00000371108.8	9	14	0	0	0	0	0	0	0	0	0	0	0	0	0	0	0	0	0	0	0	0	0	0	0	0	0	0	0	0.26688	0	0	0	0	0	0	0	0	0	0	0	0
chr1_63415873_63419440_+	ENSG00000088035.15	ALG6	chr1	63415873	63419440	+	ENST00000371108.8	11	12	0	0	0	0	0	0	0	0	0	0	0	0	0	0	0	0	0	0	0	0	0	0	0	0	0	0	0	0	0	0	0	0	0	0	0	0	0	0	0	0
chr1_63419370_63429126_+	ENSG00000088035.15	ALG6	chr1	63419370	63429126	+	ENST00000371108.8	12	14	0	0	0	0	0	0	0	0	0	0	0	0	0	0	0	0	0	0	0	0	0	0	0	0	0	0	0	0	0	0	0	0	0	0	0	0	0	0	0	0
chr1_114684199_114688741_-	ENSG00000116748.21	AMPD1	chr1	114684199	114688741	-	ENST00000520113.6	5	3	0	0	0	0	0	0	0	0	0.594723	0	0	0	0	0	0	0	0	0	0	0	0	0	0	0	0	0	0	0	0	0	0	0	0	0	0	0	0	0	0	0
chr1_109625662_109627518_+	ENSG00000116337.15	AMPD2	chr1	109625662	109627518	+	ENST00000528667.5	4	9	0	0	0	0	0	0	0	0	0	0	0	0	0	0	0	0	0	0	0	0	0	0	0	0	0	0	0	0	0	0	0	0	0	0	0	0	0	0	0	0
chr1_103656844_103656990_+	ENSG00000237763.9	AMY1A	chr1	103656844	103656990	+	ENST00000370083.8	3	3	0	0	0	0	0	0	0	0	0	0	0	0	0	0	0	0	0	0	0	0	0	0	0	0	0	0	0	0	0	0	0	0	0	0	0	0	0	0	0	0
chr1_103565435_103573260_+	ENSG00000240038.6	AMY2B	chr1	103565435	103573260	+	ENST00000361355.8	2	5	0	0	0	0	0	0	0	0	0	0	0	0	0	0	0	0	0	0	0	0	0	0	0	0	0	0	0	0	0	0	0	0	0	0	0.257402	0	0	0	0	0
chr1_103565435_103575540_+	ENSG00000240038.6	AMY2B	chr1	103565435	103575540	+	ENST00000361355.8	2	9	0	0	0	0	0	0	0.255961	0	0.53411	0.581	0	0.481881	0	0	0	2.75565	0	0	0	0	0	0	2.13451	0	0	0.322986	0.893175	0	0	0	0	0	0.56721	0.188509	0.736195	0	0.292743	0.16834	0	0
chr1_213007129_213008466_-	ENSG00000174606.13	ANGEL2	chr1	213007129	213008466	-	ENST00000366962.7	4	3	0	0	0	0	0	0	0	0	0	0	0	0	0	0	0	0	0	0	0	0	0	0	0	0	0	0	0	0	0	0	0	0	0	0	0	0	0	0	0	0
chr1_213005033_213013418_-	ENSG00000174606.13	ANGEL2	chr1	213005033	213013418	-	ENST00000366962.7	5	2	0	0	0	0	0	0	0	0	0	0	0	0	0	0	0	0	0	0	0	0	0	0	0	0	0	0	0	0	0	0	0	0	0	0	0	0	0	0	0	0
chr1_213005033_213007198_-	ENSG00000174606.13	ANGEL2	chr1	213005033	213007198	-	ENST00000366962.7	5	4	0	0	0	0	0	0	0	0.22942	0	0	0	0	0	0	0	0	0	0	0	0	0	0	0	0	0	0	0	0	0	0	0	0	0	0	0.27011	0	0	0	0	0.364473
chr1_213005033_213005454_-	ENSG00000174606.13	ANGEL2	chr1	213005033	213005454	-	ENST00000366962.7	5	5	0	0	0	0	0	0	0	0	0	0	0	0	0	0	0	0	0	0	0	0	0	0	0	0	0	0	0	0	0	0	0	0	0	0	0	0	0	0	0.359576	0
chr1_212997155_213013418_-	ENSG00000174606.13	ANGEL2	chr1	212997155	213013418	-	ENST00000366962.7	8	2	0	0.687692	0	0	0	0	0	0.45884	0	0.547384	0	0.318948	0	0	0	0	0	0	0	0	0	0	1.30533	0.424084	0	0	0	0	0.297656	0.688534	0	0	0	0.188509	0	0	0	0	0	0
chr1_212997155_213008466_-	ENSG00000174606.13	ANGEL2	chr1	212997155	213008466	-	ENST00000366962.7	8	3	0	0	0	0	0	0	0	0	0	0	0	0	0	0	0	0.332188	0	0	0	0	0	0	0	0	0	0	0.496832	0	0	0	0	0	0	0	0	0	0	0	0.344189	0
chr1_212997155_213000383_-	ENSG00000174606.13	ANGEL2	chr1	212997155	213000383	-	ENST00000366962.7	8	7	0	0	0	0	0	0	0	0	0	0	0	0	0	0	0	0	0	0	0	0	0	0	0	0	0	0	0	0	0	0	0	0	0	0	0	0	0	0	0.719152	0
chr1_178864954_178869223_-	ENSG00000116194.12	ANGPTL1	chr1	178864954	178869223	-	ENST00000234816.6	3	2	0	0	0	0	0	0	0	0	0	0	0	0	0.285577	0	0	0	0	0	0	0	0	0	0	0	0	0	0	0	0	0	0	0	0	0	0	0	0	0	0	0
chr1_70324853_70336099_-	ENSG00000118454.12	ANKRD13C	chr1	70324853	70336099	-	ENST00000370944.8	3	2	0	0	0	0	0	0	0	0	0	0	0	0.438693	0	0	0	0	0	0	0.228832	0	0	0	0	0	0	0	0	0	0	0	0	0	0	0	0	0	0	0	0	0
chr1_70313745_70324957_-	ENSG00000118454.12	ANKRD13C	chr1	70313745	70324957	-	ENST00000370944.8	5	3	0	0	0	0	0	0	0	0	0	0	0.251606	0	0	0	0	0	0	0	0	0	0	0	0	0.292128	0	0	0	0	0	0	0	0	0	0	0	0	0	0	0	0
chr1_70306224_70324957_-	ENSG00000118454.12	ANKRD13C	chr1	70306224	70324957	-	ENST00000370944.8	6	3	0	0	0	0	0	0	0	0	0	0	0	0	0	0	0	0	0	0	0	0.228857	0	0	0	0	0	0	0	0	0	0	0	0	0	0	0	0	0.267418	0	0	0
chr1_70306224_70315566_-	ENSG00000118454.12	ANKRD13C	chr1	70306224	70315566	-	ENST00000370944.8	6	4	1.05511	0	0	0	0	0	0	0	0	0	0.251606	0	0.691854	0	0.559125	0	0	0	0	0	0	0	0	0	0	1.11481	0	0	0	0	0	0	0.269653	0	0.239396	0	0	0	0.359576	0
chr1_70300764_70336099_-	ENSG00000118454.12	ANKRD13C	chr1	70300764	70336099	-	ENST00000370944.8	7	2	0	0	0	0	0	0	0	0	0	0	0	0	0	0	0	0	0	0	0	0	0	0	0	0	0	0	0	0	0	0	0	0	0	0	0	0	0.292743	0	0	0
chr1_70300764_70324957_-	ENSG00000118454.12	ANKRD13C	chr1	70300764	70324957	-	ENST00000370944.8	7	3	0	0	0	0	0	0	0	0	0	0	0	0	0	0	0	0	0	0	0	0	0	0	0	0	0	0	0	0	0	0	0	0	0	0	0	0	0	0	0.344189	0
chr1_70300764_70315566_-	ENSG00000118454.12	ANKRD13C	chr1	70300764	70315566	-	ENST00000370944.8	7	4	0	1.0574	0	0	1.56019	0.217621	0	0	1.33528	0	0.538562	0.24094	0	0	0	0.332188	2.31087	0.620888	0.228832	0	0.234719	0.170444	0.662992	0	0	0	0	0.831783	0.297656	0.530862	0	1.01174	0	0.188509	0.257402	0.4432	0.534836	0	0.344189	0
chr1_70300764_70313790_-	ENSG00000118454.12	ANKRD13C	chr1	70300764	70313790	-	ENST00000370944.8	7	5	0	0	0	0	0	0	0	0	0	0	0	0	0	0	0	0	0.263939	0	0	0	0	0.246697	0	0	0	0	0	0	0.297656	0	0	0	0	0	0	0	0	0	0	0
chr1_70300764_70306290_-	ENSG00000118454.12	ANKRD13C	chr1	70300764	70306290	-	ENST00000370944.8	7	6	0	0	0	0	0	0	0	0	0	0	0	0	0	0	0	0	0	0	0.291262	0	0	0	0.331496	0.292128	0	0	0	0	0.297656	0	0	0	0.269653	0.528934	0	0	0	0	0	0
chr1_70296130_70324957_-	ENSG00000118454.12	ANKRD13C	chr1	70296130	70324957	-	ENST00000370944.8	8	3	0	0	0	0	0.311608	0.217621	0	0	0	0	0	0	0	0	0	0	0	0	0	0	0	0	0	0	0	0	0	0	0	0	0	0	0	0.188509	0	0	0	0	1.37675	0
chr1_70296130_70315566_-	ENSG00000118454.12	ANKRD13C	chr1	70296130	70315566	-	ENST00000370944.8	8	4	0.270788	0	0	1.34621	0.712794	0.388474	0	0	0.53411	0	0	0	0	0	0	0.908487	0.527878	0	0.582524	0	0	0.187335	0	0.292128	0	0	0.496832	0	0	1.18903	0	0	0.269653	0.450448	0.478793	0	0	0.33668	0	0
chr1_70296130_70306290_-	ENSG00000118454.12	ANKRD13C	chr1	70296130	70306290	-	ENST00000370944.8	8	6	0.270788	0.406923	0	0	0	0.388474	0	0	1.69258	0	0	0	0	0	0	0	0.901303	0	0	0	0.262044	0	0	0	0	0	0	0	0.595312	0.750738	0	0	1.15024	0.188509	0	0	0.560161	0.338014	1.79788	0
chr1_70296130_70300908_-	ENSG00000118454.12	ANKRD13C	chr1	70296130	70300908	-	ENST00000370944.8	8	7	0	0	0	0	0	0	0	0	0	0	0	0	0	0	0	0	0	0	0	0	0	0	0	0.292128	0	0	0	0	0	0	0	0	0	0	0	0	0	0	0	0
chr1_70292388_70324957_-	ENSG00000118454.12	ANKRD13C	chr1	70292388	70324957	-	ENST00000370944.8	9	3	0	0	0	0	0	0	0	0	0.53411	0	0	0.559888	0.285577	0	0	0	0	0	0.681071	0	0	0	0.276394	0	0	0	0	0	0	0	0	0	0	0.340425	0.478793	0	0.267418	0	0	0
chr1_70292388_70315566_-	ENSG00000118454.12	ANKRD13C	chr1	70292388	70315566	-	ENST00000370944.8	9	4	4.06585	2.04038	4.42268	5.04253	6.29436	1.94359	2.5149	2.02629	8.85118	5.23943	6.60512	5.47624	1.14231	2.03651	2.54984	3.10479	6.60409	6.7322	5.27779	4.26939	6.87933	2.01765	4.39389	4.48608	2.33404	3.27173	4.06969	3.23126	4.8258	3.65819	3.61137	4.76054	5.24231	7.94003	3.37587	6.11331	7.44147	6.27833	11.3697	3.05743
chr1_70292388_70313790_-	ENSG00000118454.12	ANKRD13C	chr1	70292388	70313790	-	ENST00000370944.8	9	5	0	0	0	0	0	0	0	0	0	0	0	0	0	0	0.633398	0.332188	0.273746	0	0.452239	0.710484	0	0	0	0	0	0	0	0	0	0	0	0	0.269653	0	0	0	0	0	0	0
chr1_70292388_70306290_-	ENSG00000118454.12	ANKRD13C	chr1	70292388	70306290	-	ENST00000370944.8	9	6	0	1.74509	0	0	1.159	0.513773	0.320729	0	2.71501	0.581	0.286956	1.6434	1.58613	0.916258	0.316699	1.18816	1.61306	1.72057	0.681071	0.252769	0.731482	0.681777	0.621676	1.69952	0	0	0.894205	0	0.704464	2.04197	0	0	0.56721	1.35135	0.754201	1.2816	0.714721	0.338014	3.03837	0
chr1_70292388_70300908_-	ENSG00000118454.12	ANKRD13C	chr1	70292388	70300908	-	ENST00000370944.8	9	7	0.483388	1.37538	0	0	0	0	0.432249	0.553919	2.22535	0	0	0.24094	0	0	0	0.332188	1.33931	1.55823	0.912616	0	0	0	0	0.424084	0.692705	0.432484	0	0.353169	0	0	0.559112	0	0.341285	0	0	0.227166	0.802255	0.16834	1.39214	0
chr1_70292388_70296261_-	ENSG00000118454.12	ANKRD13C	chr1	70292388	70296261	-	ENST00000370944.8	9	8	0	0	0	0	0.224177	0	0	0	0	0	0.251606	0	0	0	0	0	0	0	0	0	0	0	0	0	0	0	0.993664	0	0	0	0	0	0	0	0	0	0	0	0	0
chr1_70276765_70324957_-	ENSG00000118454.12	ANKRD13C	chr1	70276765	70324957	-	ENST00000370944.8	10	3	0	0	0	0	0	0	0	0	0	0	0	0	0	0	0	0	0	0	0	0	0.262044	0	0	0	0	0	0	0	0	0	0	0	0	0	0	0	0	0	0	0
chr1_70276765_70315566_-	ENSG00000118454.12	ANKRD13C	chr1	70276765	70315566	-	ENST00000370944.8	10	4	0.270788	0	0.406021	0	0	0.435243	0.216125	1.15012	0.53411	0	0.652051	0	0	0.168313	0.316699	0.332188	0	0	0	0	0.469438	0.187335	0	0.424084	0	1.61493	0.993664	0	0	0.459022	0	0.252936	0.225925	1.08941	0.257402	0	0	0.844368	0	0
chr1_70276765_70306290_-	ENSG00000118454.12	ANKRD13C	chr1	70276765	70306290	-	ENST00000370944.8	10	6	0	0	0	0	0	0	0	0.45884	0	0	0	0	0	0	0	0	0	0	0.452239	0	0	0	0	0	0	0	0	0	0	0	0.279556	0	0	0	0	0	0	0	0	0
chr1_70276765_70300908_-	ENSG00000118454.12	ANKRD13C	chr1	70276765	70300908	-	ENST00000370944.8	10	7	0	0	0	0	0	0	0	0	0	0	0	0	0	0	0	0	0	0	0	0	0	0	0	0	0	0	0	0	0	0	0	0	0	0	0	0	0	0	0	0
chr1_70276765_70296261_-	ENSG00000118454.12	ANKRD13C	chr1	70276765	70296261	-	ENST00000370944.8	10	8	0	0	0	0	0	0	0	0	0	0	0	0	0	0	0	0	0	0	0	0	0	0	0	0	0	0	0	0	0	0	0	0	0	0	0	0	0	0	0	0
chr1_70276765_70292549_-	ENSG00000118454.12	ANKRD13C	chr1	70276765	70292549	-	ENST00000370944.8	10	9	0	0	0	0	0	0	0	0	0	0	0	0	0	0	0	0	0	0	0	0	0	0	0	0	0	0	0	0	0	0	0	0	0	0	0	0	0	0	0	0
chr1_70274720_70315566_-	ENSG00000118454.12	ANKRD13C	chr1	70274720	70315566	-	ENST00000370944.8	11	4	0	0	0	0	0.802374	0	0	0	0	0	0	0	0	0	0	0.664375	0	0	0	0	0	0	0	0.292128	1.38541	0	0	0	0	0	0	0	0	0	0	0.355187	0	0	0.567498	0
chr1_70274720_70306290_-	ENSG00000118454.12	ANKRD13C	chr1	70274720	70306290	-	ENST00000370944.8	11	6	0.527554	0	0	0	0	0	0	0	0	0	0	0	0	0	0	0	0	0	0	0	0	0	0	0	0	0.937678	0	0	0	0	0	0	0	0	0	0.216034	0	0.16834	0	0
chr1_70274720_70300908_-	ENSG00000118454.12	ANKRD13C	chr1	70274720	70300908	-	ENST00000370944.8	11	7	0	0	0	0	0	0	0	0	0	0	0	0	0	0	0	0	0.263939	0	0	0	0	0	0	0	0	0	0.297039	0	0	0	0	0	0	0	0	0	0	0	0	0
chr1_70274720_70296261_-	ENSG00000118454.12	ANKRD13C	chr1	70274720	70296261	-	ENST00000370944.8	11	8	0	0	0	0	0	0	0	0	0	0	0	0	0	0	0	0	0.821239	0	0	0	0	0	0	0	0	0	0	0	0	0	0	0	0	0	0	0	0	0	0	0
chr1_70274720_70292549_-	ENSG00000118454.12	ANKRD13C	chr1	70274720	70292549	-	ENST00000370944.8	11	9	0	0	0	0	0	0	0	0	0	0	0	0	0	0	0	0	0	0	0	0	0	0	0	0	0	0	0	0	0	0	0	0	0	0	0	0	0	0	0	0
chr1_70274720_70276844_-	ENSG00000118454.12	ANKRD13C	chr1	70274720	70276844	-	ENST00000370944.8	11	10	0	0	0	0	0	0.217621	0	0	0	0	0	0	0	0	0	0	0	0	0	0	0	0	0	0	0	0	0	0	0	0	0.279556	0	0	0	0	0	0	0	0	0
chr1_70270856_70324957_-	ENSG00000118454.12	ANKRD13C	chr1	70270856	70324957	-	ENST00000370944.8	12	3	0	0	0	0	0	0	0	0	0	0	0	0	0	0.186709	0	0	0	0	0	0	0	0	0	0	0	0	0	0	0	0	0	0	0	0	0	0	0	0	0	0
chr1_70270856_70315566_-	ENSG00000118454.12	ANKRD13C	chr1	70270856	70315566	-	ENST00000370944.8	12	4	0.241694	1.68202	0	0	0.759961	0.256886	0	0.643738	2.60015	1.17668	0.790169	0.963762	0	0.560681	0	2.18472	1.33931	0.620888	0.22612	0.758308	0.496763	0.562004	1.25022	0	0	1.11481	0.596137	0.176584	0	0.280616	0.279556	1.45698	0	0.188509	1.02431	0	0.852904	1.05668	2.06513	0
chr1_70270856_70306290_-	ENSG00000118454.12	ANKRD13C	chr1	70270856	70306290	-	ENST00000370944.8	12	6	0.263777	0	0	0	0	0	0	0	0.594723	0	0.251606	0.877386	0	0.186709	0	0	0	1.46492	0.291262	0	0	0	0	0	0	0.468839	0	0.710345	0	0	0	0.429836	0	0	0	0	0	0	0.567498	0
chr1_70270856_70300908_-	ENSG00000118454.12	ANKRD13C	chr1	70270856	70300908	-	ENST00000370944.8	12	7	0	0	0	0.604644	0	0	0	0	0	0.547384	0	0.24094	0	0	0	0	0	1.00638	0	0	0	0.187335	0	0	0	0.432484	0	0.3276	0	0	0	0	0.451851	0	0	0	0	0.676028	0.688377	0
chr1_70270856_70296261_-	ENSG00000118454.12	ANKRD13C	chr1	70270856	70296261	-	ENST00000370944.8	12	8	0	0	0	0	0	0	0	0	0	0	0	0	0	0	0	0	0	0	0	0	0	0.493394	0	0	0	0	0	0	0	0	0	0	0	0	0	0	0	0	0	0
chr1_70270856_70292549_-	ENSG00000118454.12	ANKRD13C	chr1	70270856	70292549	-	ENST00000370944.8	12	9	0	0	0	0	0	0	0	0	0	0	0	0	0	0	0	0	0	0	0	0	0	0	0	0	0	0	0	0	0	0	0	0	0	0	0	0	0	0	0	0
chr1_70270856_70276844_-	ENSG00000118454.12	ANKRD13C	chr1	70270856	70276844	-	ENST00000370944.8	12	10	0	0.406923	0	0	1.16115	0.256886	0.255961	0.414318	0	0	0.503213	0.318948	0	0.374527	0	0	0.537685	0.292181	0.291262	0	0	0.417141	0	1.24722	0	0.322986	0	0.3276	0.297656	0	0	0	0	0	1.28912	0	0	0	1.07873	0
chr1_173646846_173659433_-	ENSG00000183831.6	ANKRD45	chr1	173646846	173659433	-	ENST00000333279.2	3	2	0	0	0	0	0	0	0	0	0	0	0	0	0	0	0	0	0	0	0	0	0	0	0	0	0	0	0	0	0	0	0	0.298654	0	0.377018	0	0	0	0	0	0
chr1_173624787_173627159_-	ENSG00000183831.6	ANKRD45	chr1	173624787	173627159	-	ENST00000333279.2	5	4	0	0	0	0	0	0	0	0	0	0	0	0	0	0	0	0	0	0	0	0	0	0	0	0	0	0	0	0	0	0	0	0	0	0	0.27011	0	0	0	0.344189	0
chr1_150229072_150235829_-	ENSG00000143401.14	ANP32E	chr1	150229072	150235829	-	ENST00000369115.3	3	2	0	0	0	0	0	0	0	0	0	0	0	0	0	0	0	0	0	0	0	0	0	0	0	0	0	0	0	0	0	0	0	0	0	0	0	0	0.292743	0	0	0
chr1_150226608_150235829_-	ENSG00000143401.14	ANP32E	chr1	150226608	150235829	-	ENST00000369115.3	4	2	0	0	0	0	0	0	0	0	0	0	0.573911	0	0	0	0	0	0	0	0	0	0	0	0	0	0	0	0	0	0	0	0	0	0	0	0	0	0	0	0	0
chr1_150230571_150231926_-	ENSG00000143401.14	ANP32E	chr1	150230571	150231926	-	ENST00000583931.5	3	2	0.798342	0.306634	0	0	1.20832	1.21219	0	0.276959	0	0.547384	1.36408	0.438693	0	0.504939	2.71883	0	2.69823	0.620888	0	0	0.234719	1.9332	0.276394	0	1.16702	0.432484	0.7949	0.706337	0	0.280616	0.547682	0	0.88059	0.717444	0.257402	0	0.292743	0.351782	2.09591	0
chr1_150229072_150231926_-	ENSG00000143401.14	ANP32E	chr1	150229072	150231926	-	ENST00000583931.5	4	2	0	0	0.494341	0	0	0	0	0	0	0	0.400444	0	0	0	0	0	0	0	0	0	0	0	0	0	0	0	0	0	0	0	0.279556	0	0	0	0	0	0	0	0	0
chr1_150226608_150231926_-	ENSG00000143401.14	ANP32E	chr1	150226608	150231926	-	ENST00000583931.5	5	2	0	0	0	0	0	0	0	0	0	0.629299	0	0	0	0	0	0	0	0	0	0	0	0	0	0	0	0	0	0.176584	0	0	0	0	0	0	0	0	0	0	0	0
chr1_150226608_150230693_-	ENSG00000143401.14	ANP32E	chr1	150226608	150230693	-	ENST00000583931.5	5	3	0	0	0	0	0	0	0	0	0	0	0	0	0	0	0.241586	0	0	0	0	0	0	0	0	0	0	0	0	0	0	0	0	0	0	0	0	0.216034	0	0	0	0
chr1_150226608_150229237_-	ENSG00000143401.14	ANP32E	chr1	150226608	150229237	-	ENST00000583931.5	5	4	0.263777	0.306634	1.14765	0.604644	0	0.256886	0.216125	0	0	0.581	0	0.318948	0.571154	0	0.559125	0	0.273746	0	0	0	0	0.493394	0	0.292128	0	0	0.297039	0.176584	0	0	0.547682	0	0	0	0.779616	0.4432	0	0.183442	0	0.506118
chr1_150226608_150226795_-	ENSG00000143401.14	ANP32E	chr1	150226608	150226795	-	ENST00000583931.5	5	5	0	0	0	0	0	0	0	0	0	0	0	0	0	0	0	0.302829	0	0	0	0	0	0	0	0	0	0	0	0	0	0	0	0	0	0	0	0	0	0	0	0
chr1_150223186_150229237_-	ENSG00000143401.14	ANP32E	chr1	150223186	150229237	-	ENST00000583931.5	6	4	0	0	0	0	0	0	0	0	0	0	0	0	0	0	0	0	0	0	0	0	0	0	0	0	0	0	0	0	0	0	0	0	0	0	0	0	0	0	0	0
chr1_150223186_150226795_-	ENSG00000143401.14	ANP32E	chr1	150223186	150226795	-	ENST00000583931.5	6	5	0	0	0	0	0	0	0	0	0	0	0	0	0	0	0	0	0.70762	0	0	0	0	0	0	0	0	0	0	0	0	0	0	0	0	0	0	0	0	0	0	0
chr1_150987872_150988341_+	ENSG00000143412.9	ANXA9	chr1	150987872	150988341	+	ENST00000368947.8	10	12	0	0	0	0	0	0	0	0	0	0	0	0	0	0	0	0	0.273746	0	0	0	0	0	0	0	0	0	0	0	0	0	0	0	0	0	0	0	0	0	0	0
chr1_113901236_113901885_-	ENSG00000134262.12	AP4B1	chr1	113901236	113901885	-	ENST00000256658.8	5	4	0	0	0	0	0	0.435243	0	0	0	0	0	0	0.345927	0	0	0	0	0	0	0	0	0	0.331496	0	0	0	0	0	0	0	0	0	0	0	0	0.216034	0	0	0	0
chr1_113899904_113900400_-	ENSG00000134262.12	AP4B1	chr1	113899904	113900400	-	ENST00000256658.8	6	6	0	0	0	0	0	0	0	0	0	0	0	0	0	0	0	0	0	0	0	0	0	0	0	0	0	0	0	0	0	0	0	0	0	0	0	0.216034	0	0	0	0
chr1_113898718_113901885_-	ENSG00000134262.12	AP4B1	chr1	113898718	113901885	-	ENST00000256658.8	7	4	0	0	0	0	0	0	0	0	0	0	0	0	0	0	0	0	0	0	0	0	0	0	0	0	0	0	0	0	0	0	0	0	0	0	0	0	0	0.183442	0	0
chr1_113897840_113902862_-	ENSG00000134262.12	AP4B1	chr1	113897840	113902862	-	ENST00000256658.8	8	3	0	0	0	0	0	0	0	0	0	0	0	0	0	0	0.241586	0	0	0	0.228832	0	0	0	0	0	0	0	0	0	0	0	0	0	0	0	0	0	0	0	0	0
chr1_113897840_113901885_-	ENSG00000134262.12	AP4B1	chr1	113897840	113901885	-	ENST00000256658.8	8	4	0	0	0	0	0	0	0.255961	0.22942	0	0	0	0	0	0	0	0	0.70762	0	0	0	0	0	0	0	0	0	0.297039	0	0	0	0	0	0	0	0	0.227166	0.292743	0.338014	0	0
chr1_150267356_150268127_-	ENSG00000117362.12	APH1A	chr1	150267356	150268127	-	ENST00000369109.7	4	2	0	0	0	0	0	0	0	0	0	0	0	0	0	0	0	0	0	0	0	0	0	0	0	0	0	0	0	0	0	0	0	0	0	0	0	0	0	0	0	0
chr1_10433842_10434690_+	ENSG00000251503.8	APITD1-CORT	chr1	10433842	10434690	+	ENST00000602787.6	2	3	0	0	0	0	0	0	0.511922	0	0	0	0	0	0	0	0	0	0	0	0	0	0	0	0	0	0	0	0	0	0	0	0	0	0	0	0	0	0	0	0	0
chr1_10433842_10440413_+	ENSG00000251503.8	APITD1-CORT	chr1	10433842	10440413	+	ENST00000602787.6	2	4	0	0	0	0	0	0	0	0	0	0	0	0	0	0	0	0	0	0	0	0	0	0	0	0	0	0	0	0	0.352232	0	0	0	0	0	0	0	0	0	0	0
chr1_10433842_10442441_+	ENSG00000251503.8	APITD1-CORT	chr1	10433842	10442441	+	ENST00000602787.6	2	5	0	0	0	0	0	0	0	0	0	0	0	0	0	0.355576	0.241586	0.59408	0	0.292181	0	0	0	0.246697	0	0	0	0	0	0	0	0	0	0	0	0	0	1.2816	0	0	0.359576	0
chr1_10440347_10442441_+	ENSG00000251503.8	APITD1-CORT	chr1	10440347	10442441	+	ENST00000602787.6	4	5	0.995871	1.22077	0	0	0.311608	0.776948	0.320729	0	1.12749	0.629299	0	0	0	0	1.11825	1.66094	0	0.620888	0.808643	0	0	0.340888	0	0	0.583509	0	0	0.3276	1.76116	1.14756	0	0	3.02199	0.523879	0	3.42733	0.534836	0.50502	0.688377	0
chr1_228097078_228097452_+	ENSG00000143761.15	ARF1	chr1	228097078	228097452	+	ENST00000473949.5	3	4	0	0	0	0	0	0	0	0	0	0	0	0	0	0	0	0	0	0	0	0	0.234719	0	0	0	0	0	0	0	0	0	0	0	0	0	0	0	0.267418	0	0	0
chr1_228097078_228097715_+	ENSG00000143761.15	ARF1	chr1	228097078	228097715	+	ENST00000473949.5	3	5	0	0	0	0	0	0	0	0	0	0	0	0	0	0	0	0	0	0	0	0	0	0	0	0	0	0	0	0	0	0	0	0	0	0	0	0	0	0	0	0.364473
chr1_94231407_94231643_-	ENSG00000137962.12	ARHGAP29	chr1	94231407	94231643	-	ENST00000552844.5	2	2	0	0	0	0	0.448354	0	0	0	0	0	0	0	0	0	0	0.291251	0.35381	0	0	0	0	0	0	0	0	0	0	0	0	0	0	0.252936	0	0	0	0	0	0	0	0
chr1_94220258_94231643_-	ENSG00000137962.12	ARHGAP29	chr1	94220258	94231643	-	ENST00000552844.5	3	2	0	0.406923	2.5334	1.81393	1.60475	0	0.536854	3.63749	0.281873	0	0.903657	3.79657	0	1.77677	0	1.24688	0.801624	0.620888	0	0.228857	3.47955	0	0.621676	0	0	0.432484	0	0.533761	0.892968	0	1.10679	0	2.06977	3.43579	3.29643	0.227166	1.14565	0	1.78249	0
chr1_94220258_94220392_-	ENSG00000137962.12	ARHGAP29	chr1	94220258	94220392	-	ENST00000552844.5	3	3	0	0	0	0	0	0	0	0	0	0	0	0	0	0	0	0	0	0	0	0	0	0	0	0	0	0	0	0	0	0	0	0	0	0	0	0	0	0	0	0
chr1_94209254_94231643_-	ENSG00000137962.12	ARHGAP29	chr1	94209254	94231643	-	ENST00000552844.5	4	2	0	0	0	0	0.401187	0	0	0	0	0	0	0	0	0	0	0	0	0	0	0	0	0	0	0	0	0	0	0	0	0	0	0	0	0	0	0	0	0	0	0
chr1_94208832_94231643_-	ENSG00000137962.12	ARHGAP29	chr1	94208832	94231643	-	ENST00000552844.5	5	2	0	0	0	0	0	0	0	0	0	0	0	0	0	0	0	0	0	0	0	0	0	0	0	0	0	0	0	0	0	0	0	0	0	0	0	0	0	0	0.344189	0
chr1_94208832_94220392_-	ENSG00000137962.12	ARHGAP29	chr1	94208832	94220392	-	ENST00000552844.5	5	3	0	0	0	0	0	0	0	0	0	0	0	0	0	0	0	0	0	0	0	0	0	0	0	0	0	0	0	0	0	0	0	0	0	0	0	0	0	0	0.344189	0
chr1_94203930_94231643_-	ENSG00000137962.12	ARHGAP29	chr1	94203930	94231643	-	ENST00000552844.5	8	2	0	0	0	0	0	0	0	0	0	0	0	0	0	0	0	0	0	0	0	0.252769	0	0	0	0	0	0	0	0	0	0	0	0	0	0	0	0	0	0	0	0
chr1_94203930_94205683_-	ENSG00000137962.12	ARHGAP29	chr1	94203930	94205683	-	ENST00000552844.5	8	6	0	0	0	0	0	0	0	0	0	0	0	0	0	0	0	0	0	0	0	0	0.262044	0	0	0	0	0	0	0	0	0	0	0	0.808958	0	0	0	0	0	0	0
chr1_94201720_94231643_-	ENSG00000137962.12	ARHGAP29	chr1	94201720	94231643	-	ENST00000552844.5	12	2	0	0.813846	1.38599	0.673104	2.45475	0.388474	0.255961	1.83536	0.815984	0	0.573911	2.6768	0	0	0.724757	0.635017	1.87699	0.422015	0.748926	3.23629	2.7109	0.357779	0.552789	2.5795	0	0.322986	0	0.353169	0.297656	0.790744	0	0	0.225925	3.39365	1.29972	0.227166	0	0.85947	5.35452	0
chr1_94201720_94220392_-	ENSG00000137962.12	ARHGAP29	chr1	94201720	94220392	-	ENST00000552844.5	12	3	0	0	0	0	0	0	0	0	0	0	0	0	0	0	0	0	0	0	0	0	0	0	0	0	0	0	0	0.982799	0	0	0	0	0	0	0	0	0	0	0	0
chr1_94201720_94209350_-	ENSG00000137962.12	ARHGAP29	chr1	94201720	94209350	-	ENST00000552844.5	12	4	0	0	0	0	0.311608	0.388474	0	0	0	0	0	0	0	0	0	0	0	0	0	0	0	0	0	0	0	0	0	0	0	0	0	0	0	0	0	0	0	0	0	0
chr1_94201720_94203210_-	ENSG00000137962.12	ARHGAP29	chr1	94201720	94203210	-	ENST00000552844.5	12	9	0	0	0	0	0	0	0	0.276959	0	0	0	0.438693	0	0	0	0	0	0	0	0	0	0	0	0	0	0	0	0	0.595312	0	0	0	0	0	0	0	0	0	0	0
chr1_94201720_94202998_-	ENSG00000137962.12	ARHGAP29	chr1	94201720	94202998	-	ENST00000552844.5	12	10	0	0	0	0	0.311608	0	0	0	0	0	0	0	0	0	0	0	0	0	0	0	0	0	0	0	0	0	0	0	0	0	0	0	0	0	0	0	0	0	0	0
chr1_94188837_94231643_-	ENSG00000137962.12	ARHGAP29	chr1	94188837	94231643	-	ENST00000552844.5	15	2	0	0	0	0	0	0	0	0	0	0	0	0	0	0	0	0	0	0	0	0	0	0	0	0	0	0	0	0	0	0	0	0	0	0	0	0	0	0	0	0
chr1_94185342_94231643_-	ENSG00000137962.12	ARHGAP29	chr1	94185342	94231643	-	ENST00000552844.5	17	2	0	0	0	0	0	0	0	0	0	0	0	0	0	0	0	0	0	0	0	0	0	0	0.310838	0	0	0	0	0	0	0	0	0	0	0	0	0	0	0	0	0
chr1_94185342_94220392_-	ENSG00000137962.12	ARHGAP29	chr1	94185342	94220392	-	ENST00000552844.5	17	3	0	0	0	0	0	0	0	0	0	0	0	0	0	0	0	0	0	0	0	0	0	0	0	0	0	0	0	0	0	0	0	0	0	0	0	0	0	0	0	0
chr1_94184872_94203994_-	ENSG00000137962.12	ARHGAP29	chr1	94184872	94203994	-	ENST00000552844.5	18	8	0	0	0	0	0	0	0	0.414318	0	0	0	0	0	0.186709	0	0	0	0	0	0	0	0	0	0	0	0	0	0	0	0	0	0	0	0	0	0	0	0	0	0
chr1_94184872_94185481_-	ENSG00000137962.12	ARHGAP29	chr1	94184872	94185481	-	ENST00000552844.5	18	17	0	0	0	0	0	0	0	0	0	0	0	0.438693	0	0	0	0	0	0	0	0	0	0	0	0	0	0	0	0	0	0	0	0	0	0	0	0	0	0	0	0
chr1_94184151_94231643_-	ENSG00000137962.12	ARHGAP29	chr1	94184151	94231643	-	ENST00000552844.5	19	2	0	0	0	0.604644	0	0	0	0	0	0	0	0	0	0	0	0	0	0	0	0	0	0	0	0.399049	0	0	0	0	0	0	0	0	0	0	0	0	0	0	0	0
chr1_94184151_94190083_-	ENSG00000137962.12	ARHGAP29	chr1	94184151	94190083	-	ENST00000552844.5	19	13	0	0	0	0	0	0	0	0	0	0	0	0	0	0	0	0	0.273746	0	0	0	0.262044	0	0	0	0	0	0	0.26688	0	0	0	0	0	0	0.772206	0	0	0	0	0
chr1_94179725_94231643_-	ENSG00000137962.12	ARHGAP29	chr1	94179725	94231643	-	ENST00000552844.5	20	2	0	0	0	0	0	0	0	0	0	0	0	0	0	0	0	0	0	0	0	0	0	0	0	0	0	0	0	0	0	0	0	0	0	0	0	0	0	0	0	0
chr1_94179725_94190083_-	ENSG00000137962.12	ARHGAP29	chr1	94179725	94190083	-	ENST00000552844.5	20	13	0	0	0	0	0	0	0	0	0	0	0	0	0	0	0	0	0	0	0	0	0.479282	0	0	0	0	0	0	0	0	0	0	0	0	0	0	0	0	0	0	0
chr1_94179725_94189352_-	ENSG00000137962.12	ARHGAP29	chr1	94179725	94189352	-	ENST00000552844.5	20	14	0	0	0	0	0	0	0	0	0	0	0	0	0	0	0	0	0	0	0	0	0	0	0	0	0	0	0	0	0	0	0	0	0	0	0	0	0.267418	0	0	0
chr1_94177612_94231643_-	ENSG00000137962.12	ARHGAP29	chr1	94177612	94231643	-	ENST00000552844.5	22	2	0	0	0	0	0.311608	0	0	0	0	0	0	0	0	0	0	0	0	0	0	0	0.262044	0	0	0	0	0	0	0	0	0	0	0	0	0	0	0	0	0	0.567498	0
chr1_94177612_94190083_-	ENSG00000137962.12	ARHGAP29	chr1	94177612	94190083	-	ENST00000552844.5	22	13	0	0	0.406021	1.34621	0	0.256886	0	0.45884	0	0	0	0	0	0	0	0.291251	0	0	0	0	0	0.246697	0	0	0	0	0	0	0.352232	0.479757	0	0	0.539305	0.377018	0.239396	0	0	0	0	0
chr1_94177612_94184288_-	ENSG00000137962.12	ARHGAP29	chr1	94177612	94184288	-	ENST00000552844.5	22	19	0	0	0	0	0.311608	0	0	0.22942	0	0	0.503213	0	0	0	0	0	0	0	0	0	0.469438	0	0	0	0	0	0	0	0	0	0	0	0	0	0	0.216034	0	0.16834	0	0
chr1_94177612_94178167_-	ENSG00000137962.12	ARHGAP29	chr1	94177612	94178167	-	ENST00000552844.5	22	21	0	0	0	0	0	0	0	0	0	0	0	0	0	0	0	0	0	0	0	0	0	0	0	0	0	0	0	0	0	0	0	0	0	0	0	0	0	0	0	0
chr1_94174604_94231643_-	ENSG00000137962.12	ARHGAP29	chr1	94174604	94231643	-	ENST00000552844.5	23	2	0	0	0	0	0	0.217621	0	0.22942	0	0	0	0	0	0	0	0	0	0	0	0	0	0	0	0.823132	0	0	0	0	0	0	0	0	0	0	0	0	0	0	1.7025	0
chr1_94174604_94190083_-	ENSG00000137962.12	ARHGAP29	chr1	94174604	94190083	-	ENST00000552844.5	23	13	0	0	0	0	0.401187	0	0	0	0	0	0	0	0	0	0	0	0	0	0	0	0	0	0	0	0	0	0	0	0	0	0	0	0	0	0	0	0	0	0	0.728946
chr1_94174604_94189352_-	ENSG00000137962.12	ARHGAP29	chr1	94174604	94189352	-	ENST00000552844.5	23	14	0	0	0	0	0	0	0	0	0	0	0	0	0	0	0	0	0.263939	0	0	0	0	0	0	0	0	0	0	0	0	0	0	0	0	0	0	0	0	0	0	0
chr1_94174604_94184288_-	ENSG00000137962.12	ARHGAP29	chr1	94174604	94184288	-	ENST00000552844.5	23	19	0	0	0.406021	0	0	0	0	0	0	0	0	0	0	0	0	0	0	0	0	0	0	0	0	0	0	0	0	0	0	0	0	0	0	0	0	0	0	0	0	0
chr1_94150352_94231643_-	ENSG00000137962.12	ARHGAP29	chr1	94150352	94231643	-	ENST00000552844.5	25	2	0	0	0	0	0	0	0	0	0	0	0	0	0	0	0	0	0	0	0	0	0	0	0	0	0	0	0	0	0	0	0	0	0	0	0	0	0	0	0.344189	0
chr1_161054623_161059716_-	ENSG00000186517.13	ARHGAP30	chr1	161054623	161059716	-	ENST00000368016.7	4	2	0	0	0	0	0	0	0	0	0	0	0	0	0	0	0	0	0	0	0	0	0	0	0	0	0	0	0	0	0	0	0	0	0	0	0	0	0	0	0	0
chr1_161052286_161059716_-	ENSG00000186517.13	ARHGAP30	chr1	161052286	161059716	-	ENST00000368016.7	9	2	0	0	0	0	0	0	0	0	0	0	0	0	0	0	0	0	0	0	0	0	0	0	0.276394	0	0	0	0	0	0	0	0	0	0	0	0	0	0	0	0	0
chr1_161052286_161056532_-	ENSG00000186517.13	ARHGAP30	chr1	161052286	161056532	-	ENST00000368016.7	9	3	0	0	0	0	0	0	0	0	0	0	0	0	0	0	0	0	0	0	0	0	0	0	0	0.424084	0	0	0	0	0	0	0	0	0	0	0	0	0	0	0	0
chr1_161051314_161059716_-	ENSG00000186517.13	ARHGAP30	chr1	161051314	161059716	-	ENST00000368016.7	10	2	0	0	0	0	0	0	0	0	0	0	0	0	0	0	0	0	0.273746	0	0	0	0	0	0	0	0	0	0	0	0	0	0	0	0	0	0	0	0	0	0	0
chr1_17640202_17691192_+	ENSG00000074964.16	ARHGEF10L	chr1	17640202	17691192	+	ENST00000167825.5	7	14	0	0	0	0	0	0	0	0	0	0	0	0	0	0	0	0	0	0	0	0	0	0	0	0	0	0	0	0	0	0	0	0	0	0	0	0	0	0	0	0
chr1_17687573_17691192_+	ENSG00000074964.16	ARHGEF10L	chr1	17687573	17691192	+	ENST00000167825.5	13	14	0	0	0	0	0	0	0	0	0	0	0	0	0	0	0	0	0	0	0	0	0	0	0	0	0	0	0	0	0	0	0	0	0.225925	0	0	0	0	0	0	0
chr1_17580553_17588479_+	ENSG00000074964.16	ARHGEF10L	chr1	17580553	17588479	+	ENST00000361221.7	2	4	1.9998	1.77096	0	0	0	0	2.36354	0.414318	0.594723	0	0	0	0.285577	0.560681	0	0.302829	1.32537	1.16873	0	1.51536	0.496763	2.54588	0.331496	0.716212	0	0	0.298068	1.12824	2.46562	0.479757	0.279556	0.505871	0	1.91206	0	0.227166	5.02094	1.37826	1.75172	0
chr1_17580553_17603591_+	ENSG00000074964.16	ARHGEF10L	chr1	17580553	17603591	+	ENST00000361221.7	2	6	0	0	0	0	0	0	0	0	0	0	0	0	0	0	0	0	0	0	0	0	0	0	0	0	0	0	0	0	0	0	0	0	0	0	0	0	0	0	0	0
chr1_17580553_17607977_+	ENSG00000074964.16	ARHGEF10L	chr1	17580553	17607977	+	ENST00000361221.7	2	7	0	0	0	0	0	0	0	0	0	0	0	0	0	0	0	0	0	0	0	0	0	0	0	0	0	0	0	0	0	0	0	0	0	0	0	0	0	0	0	0
chr1_17580553_17632466_+	ENSG00000074964.16	ARHGEF10L	chr1	17580553	17632466	+	ENST00000361221.7	2	16	0	0	0	0	0	0	0	0	0	0	0	0	0	0	0	0	0	0	0	0	0	0	0	0	0	0	0.297039	0	0	0	0	0	0	0	0	0	0	0	0	0
chr1_17580553_17664595_+	ENSG00000074964.16	ARHGEF10L	chr1	17580553	17664595	+	ENST00000361221.7	2	26	0	0	0	0	0	0	0	0	0	0	0	0	0.345927	0	0	0	0	0	0	0	0	0	0	0	0	0	0	0	0	0	0	0	0	0	0	0	0	0	0	0
chr1_17580553_17687747_+	ENSG00000074964.16	ARHGEF10L	chr1	17580553	17687747	+	ENST00000361221.7	2	27	0	0	0	0	0	0	0	0	0	0	0	0	0.285577	0	0	0	0	0	0	0	0	0	0	0	0	0	0	0	0	0	0	0	0	0	0	0	0	0	0	0
chr1_17587460_17588479_+	ENSG00000074964.16	ARHGEF10L	chr1	17587460	17588479	+	ENST00000361221.7	3	4	0	0	0	0	0	0	0	0	0	0	0	0.24094	0	0	0	0	0	0	0	0	0	0	0	0	0	0	0	0	0	0.280616	0	0	0	0	0	0	0	0	0	0
chr1_17602127_17607977_+	ENSG00000074964.16	ARHGEF10L	chr1	17602127	17607977	+	ENST00000361221.7	5	7	0	0	0	0	0	0	0.216125	0	0.281873	0	0	0	0.620102	0	0	0	0	0	0	0	0	0.170444	0	0	0	0	0	0	0	0	0	0	0	0	0	0	0	0.16834	0	0
chr1_17603508_17623175_+	ENSG00000074964.16	ARHGEF10L	chr1	17603508	17623175	+	ENST00000361221.7	6	12	0	0	0	0	0	0	0	0	0	0	0	0	0	0	0	0	0	0	0	0	0	0	0	0	0	0	0	0	0	0	0	0	0	0	0	0	0	0	0	0
chr1_17607802_17607977_+	ENSG00000074964.16	ARHGEF10L	chr1	17607802	17607977	+	ENST00000361221.7	7	7	0	0	0	0	0	0	0	0	0	0	0	0	0	0	0	0	0	0	0.22612	0	0	0	0	0	0	0	0	0	0	0	0	0	0	0	0	0	0	0	0	0
chr1_17607802_17619445_+	ENSG00000074964.16	ARHGEF10L	chr1	17607802	17619445	+	ENST00000361221.7	7	10	0	0	0	0	0	0	0	0	0	0.547384	0	0	0	0	0	0	0	0	0	0	0.469438	0	0	0	0	0	0	0	0	0	0	0	0	0	0	0	0	0	0	0
chr1_17616094_17635016_+	ENSG00000074964.16	ARHGEF10L	chr1	17616094	17635016	+	ENST00000361221.7	9	18	0	0	0	0	0	0	0	0	0	0	0	0	0	0	0	0	0	0	0	0	0	0	0	0	0	0	0	0	0	0	0	0	0	0	0.257402	0	0	0	0	0
chr1_17619339_17632466_+	ENSG00000074964.16	ARHGEF10L	chr1	17619339	17632466	+	ENST00000361221.7	10	16	0	0	0	0	0	0	0	0	0	0	0	0	0	0.187263	0	0	0	0	0	0	0	0	0	0	0	0	0	0	0	0	0	0	0	0	0	0	0	0	0	0
chr1_17634835_17635016_+	ENSG00000074964.16	ARHGEF10L	chr1	17634835	17635016	+	ENST00000361221.7	18	18	0	0	0	0	0	0	0	0	0	0	0	0	1.19126	0.186709	0	0	0	0	0.22612	0	0	0	0.276394	0	0	0	0	0	0	0	0	0	0	0	0	0	0	0	0.344189	0
chr1_17634835_17638003_+	ENSG00000074964.16	ARHGEF10L	chr1	17634835	17638003	+	ENST00000361221.7	18	19	0	0	0	0	0	0	0	0	0	0	0	0	0	0.523889	0	0	0	0	0	0	0	0	0	0	0	0	0	0	0	0	0	0	0	0	0	0	0	0	0.359576	0
chr1_17648554_17656708_+	ENSG00000074964.16	ARHGEF10L	chr1	17648554	17656708	+	ENST00000361221.7	22	25	0	0	0	0	0	0	0.216125	0	0	0	0	0	0	0	0.241586	0	0	0	0	0	0	0	0	0	0	0	0	0	0	0.280616	0	0	0	0	0	0	0	0	0	0
chr1_17648554_17664595_+	ENSG00000074964.16	ARHGEF10L	chr1	17648554	17664595	+	ENST00000361221.7	22	26	0	0	0	0	0.311608	0	0	0	0	0	0	0.318948	0	0	0	0	0	0	0	0	0	0	0	0	0	0	0	0	0	0	0	0	0	0	0	0	0	0	0	0
chr1_17654636_17656708_+	ENSG00000074964.16	ARHGEF10L	chr1	17654636	17656708	+	ENST00000361221.7	23	25	0	0.306634	0	0	0	0.256886	0	0	0	0	0	0	0	0	0	0	0	0.584363	0.291262	0	0	0	0	0	0	0	0	0	0	0	0	0	0	0	0	0	0	0	0.567498	0
chr1_17654636_17664595_+	ENSG00000074964.16	ARHGEF10L	chr1	17654636	17664595	+	ENST00000361221.7	23	26	0	0	0	0	0	0	0.216125	0	0	0	0	0	0	0	0	0	0	0	0.291262	0	0.262044	0	0	0	0	0	0	0	0	0.229511	0.547682	0	0	0	0	0	0	0	0	0
chr1_156984339_156986173_-	ENSG00000132694.18	ARHGEF11	chr1	156984339	156986173	-	ENST00000368194.7	3	2	0	0	0	0	0	0	0	0	0	0	0.286956	0	0	0.168313	0	0	0.617749	0	0	0	0.469438	0	0	0	0	0	0	0	0	0	0	0	0	0.188509	0	0	0	0	0	0
chr1_156978204_156986173_-	ENSG00000132694.18	ARHGEF11	chr1	156978204	156986173	-	ENST00000368194.7	6	2	0	0	0	0	0.311608	0	0	0	0	0	0	0	0	0	0	0	0	0	0	0	0	0	0	0	0	0	0	0	0	0	0	0	0	0	0	0	0	0	0	0
chr1_156976983_156986173_-	ENSG00000132694.18	ARHGEF11	chr1	156976983	156986173	-	ENST00000368194.7	7	2	0	0.919902	0	0	0	0	0	0	0.281873	0	0.286956	0	0	0	0	0	0	0	0	0	0.958564	0	0	0	0	0	0	0	0.352232	0	0	0	0	0.602365	0	0	0	0.16834	0	0
chr1_156976983_156980486_-	ENSG00000132694.18	ARHGEF11	chr1	156976983	156980486	-	ENST00000368194.7	7	4	0	0	0	0	0	0	0	0	0	0	0	0	0	0	0	0	0	0	0	0	0	0	0	0	0	0	0	0	0	0	0	0	0	0	0	0	0	0	0	0
chr1_156969998_156986173_-	ENSG00000132694.18	ARHGEF11	chr1	156969998	156986173	-	ENST00000368194.7	9	2	0	0	0	0	0	0	0	0	0	0	0	0	0	0	0	0	0	0	0	0	0	0	0	0	0	0	0.298068	0	0	0	0	0	0	0	0	0	0	0	0	0
chr1_156955703_156958864_-	ENSG00000132694.18	ARHGEF11	chr1	156955703	156958864	-	ENST00000368194.7	20	17	0	0	0	0	0	0	0	0	0	0	0	0	0	0	0	0	0	0	0	0	0	0	0	0	0	0	0	0	0	0	0	0	0	0	0	0	0	0	0	0
chr1_156955703_156956564_-	ENSG00000132694.18	ARHGEF11	chr1	156955703	156956564	-	ENST00000368194.7	20	19	0	0	0	0	0	0	0	0	0.281873	0	0	0	0	0	0	0	0	0	0	0	0	0	0	0	0	0	0	0	0	0	0	0	0	0	0	0	0	0	0	0
chr1_156951573_156956564_-	ENSG00000132694.18	ARHGEF11	chr1	156951573	156956564	-	ENST00000368194.7	22	19	0	0	0	0	0	0	0	0	0	0	0	0	0	0	0	0	0	0	0	0	0	0.340888	0	0	0	0	0	0	0	0	0	0	0	0	0	0	0	0	0	0
chr1_156951573_156955799_-	ENSG00000132694.18	ARHGEF11	chr1	156951573	156955799	-	ENST00000368194.7	22	20	0	0.343846	0	0	0.623215	0	0	0	0	0	0	0	0	0	0	0.332188	0	0	0	0	0	0.434032	0	0	0	0	0.496832	0	0	0.250246	0	0.298654	0.56721	0	0	0	1.72219	0	0	0
chr1_156944358_156947015_-	ENSG00000132694.18	ARHGEF11	chr1	156944358	156947015	-	ENST00000368194.7	31	27	0	0	0	0	0	0	0	0	0	0	0	0	0	0.187263	0	0	0	0	0	0	0	0	0	0	0	0	0	0	0	0	0	0	0	0	0	0	0	0	0	0
chr1_156943935_156944433_-	ENSG00000132694.18	ARHGEF11	chr1	156943935	156944433	-	ENST00000368194.7	32	31	0.263777	0	0	0	0	0	0	0	0	0	0	0	0	0	0	0	0	0	0	0	0	0	0	0	0	0	0	0	0	0	0	0	0	0	0	0	0	0	0	0
chr1_156938418_156945197_-	ENSG00000132694.18	ARHGEF11	chr1	156938418	156945197	-	ENST00000368194.7	38	30	0	0	0	0	0	0	0	0	0	0	0	0	0	0	0	0	0	0	0	0	0	0	0	0	0	0	0	0	0.352232	0	0	0	0	0	0	0	0	0	0	0
chr1_156936816_156938513_-	ENSG00000132694.18	ARHGEF11	chr1	156936816	156938513	-	ENST00000368194.7	40	38	0	0	0	0	0	0	0	0	0	0	0	0	0	0	0	0	0	0	0	0	0	0	0	0	0	0	0	0	0	0	0	0	0	0	0	0	0	0	0	0
chr1_3463066_3463672_+	ENSG00000130762.14	ARHGEF16	chr1	3463066	3463672	+	ENST00000378378.8	2	2	0	0	0	0	0	0	0	0	0	0	0	0	0	0	0	0	0	0	0.904479	0.228857	0	0	0	0	0	0	0	0	0	0	0	0	0	0	0	0	0	0	0	0
chr1_3463066_3479913_+	ENSG00000130762.14	ARHGEF16	chr1	3463066	3479913	+	ENST00000378378.8	2	14	0	0	0	0	0	0	0	0	0.281873	0	0	0	0	0	0	0	0.263939	0	0	0	0	0	0	0	0	0	0	0	0	0	0	0	0	0	0	0	0	0	0	0
chr1_3466148_3479913_+	ENSG00000130762.14	ARHGEF16	chr1	3466148	3479913	+	ENST00000378378.8	3	14	0	0	0	0	0	0	0	0	0	0	0	0	0	0	0	0	0	0	0	0	0	0	0	0	0	0.432484	0	0	0	0	0.279556	0	0	0	0	0	0	0	0	0
chr1_3467168_3479913_+	ENSG00000130762.14	ARHGEF16	chr1	3467168	3479913	+	ENST00000378378.8	4	14	0	0	0	0	0.224177	0	0	0	0	0	0	0	0	0	0	0	0	0	0	0	0	0	0	0	0	0	0	0	0	0	0	0	0	0	0	0	0	0	0	0
chr1_3473078_3476062_+	ENSG00000130762.14	ARHGEF16	chr1	3473078	3476062	+	ENST00000378378.8	7	10	0	0	0	0	0	0	0	0	0	0	0	0	0	0	0	0	0	0	0	0	0	0	0	0	0	0	0	0	0	0	0	0	0	0	0	0	0	0	0	0
chr1_3473078_3479913_+	ENSG00000130762.14	ARHGEF16	chr1	3473078	3479913	+	ENST00000378378.8	7	14	0	0	0	0	0	0	0	0	0	0	0	0	0	0	0	0	0	0	0	0.228857	0	0	0	0	0	0	0	0	0	0	0	0	0	0	0	0	0	0	0	0
chr1_16201782_16202574_-	ENSG00000142632.16	ARHGEF19	chr1	16201782	16202574	-	ENST00000270747.7	14	13	0.270788	0	0.494341	0	0	0.256886	1.28983	0.276959	1.36491	0	0.251606	0.318948	0	0.168313	0.241586	0.908487	0.527878	1.66379	1.61729	1.31041	0.262044	1.54879	1.89256	0	0	1.18796	0.496832	0	0.892968	0	0	0	0.269653	0.261939	2.33674	0.681498	1.17097	0.733767	1.07873	0
chr1_16201782_16202540_-	ENSG00000142632.16	ARHGEF19	chr1	16201782	16202540	-	ENST00000478117.5	9	8	0	0	0	0	0	0	0	0	0	0	0	0	0	0	0	0	0	0	0	0	0	0	0	0	0	0	0	0	0	0	0	0	0	0.261939	0	0	0	0	0	0
chr1_155969156_155969300_-	ENSG00000116584.17	ARHGEF2	chr1	155969156	155969300	-	ENST00000462460.6	6	6	0	0	0	0	0	0	0	0	0	0	0	0	0	0	0	0	0	0	0	0	0	0	0	0	0	0	0	0	0	0	0	0	0	0	0	0	0	0	0	0
chr1_155966416_155966887_-	ENSG00000116584.17	ARHGEF2	chr1	155966416	155966887	-	ENST00000462460.6	8	7	0	0	0	0	0	0	0	0	0	0	0	0	0	0	0	0	0	0	0	0	0	0	0	0	0	0	0	0	0	0	0	0	0	0	0	0	0	0	0	0
chr1_155964988_155969300_-	ENSG00000116584.17	ARHGEF2	chr1	155964988	155969300	-	ENST00000462460.6	11	6	0	0	0	0	0	0	0	0	0	0	0	0.24094	0	0	0.316699	0	0	0	0	0	0	0	0.552789	0	0	0	0	0	0	0.280616	0	0	0	0	0	0	0.585486	0	0	0
chr1_155964988_155965412_-	ENSG00000116584.17	ARHGEF2	chr1	155964988	155965412	-	ENST00000462460.6	11	10	0	0	0	0	0	0	0	0	0	0	0	0	0	0	0	0	0	0	0	0	0	0	0	0	0	0	0	0.533761	0	0	0	0	0	0	0	0	0	0	0	0
chr1_155962593_155969300_-	ENSG00000116584.17	ARHGEF2	chr1	155962593	155969300	-	ENST00000462460.6	13	6	0	0	0	0	0	0.256886	0	0	0	0	0	0	0	0	0	0	0	0	0	0	0	0	0	0	0	0	0	0	0	0	0	0	0	0	0	0	0	0	0	0
chr1_155962105_155969300_-	ENSG00000116584.17	ARHGEF2	chr1	155962105	155969300	-	ENST00000462460.6	14	6	0	0	0	0	0	0	0	0	0	0	0	0	0	0.187263	0	0	0	0.422015	0	0	0	0	0	0	0	0	0	0	0	0	0	0	0	0	0	0	0	0	0	0
chr1_155962105_155962718_-	ENSG00000116584.17	ARHGEF2	chr1	155962105	155962718	-	ENST00000462460.6	14	13	0	0	0	0	0	0	0	0	0	0	0	0.318948	0	0	0	0	0	0	0	0	0	0	0	0	0	0	0	0	0	0	0	0	0	0	0	0	0	0	0	0
chr1_155961661_155969300_-	ENSG00000116584.17	ARHGEF2	chr1	155961661	155969300	-	ENST00000462460.6	15	6	0	0	0	0	0	0	0	0	0	0	0	0.438693	0	0	0	0	0	0	0	0	0	0	0	0	0	0	0	0	0	0	0	0	0	0	0	0	0	0	0	0
chr1_155961661_155963183_-	ENSG00000116584.17	ARHGEF2	chr1	155961661	155963183	-	ENST00000462460.6	15	12	0	0	0	0	0	0	0	0	0	0	0	0	0	0	0	0.302829	0	0	0	0	0	0	0.331496	0	0	0	0	0	0	0	0	0	0	0	0	0	0	0	0	0
chr1_155958320_155969300_-	ENSG00000116584.17	ARHGEF2	chr1	155958320	155969300	-	ENST00000462460.6	16	6	0	0	0	0	0	0	0	0	0	0	0	0	0	0	0	0	0	0	0	0	0.234719	0	0	0	0	0	0	0	0	0	0	0	0	0	0	0	0	0	0	0
chr1_155957713_155969300_-	ENSG00000116584.17	ARHGEF2	chr1	155957713	155969300	-	ENST00000462460.6	17	6	0	0	0	0	0	0	0	0	0	0	0	0	0	0	0	0	0	0	0	0	0	0	0	0	0	0	0.594077	0	0	0	0	0	0	0	0	0	0	0	0	0
chr1_155957713_155965760_-	ENSG00000116584.17	ARHGEF2	chr1	155957713	155965760	-	ENST00000462460.6	17	9	0	0	0	0	0	0.217621	0	0	0	0	0	0	0	0	0	0	0	0	0	0	0	0	0	0	0	0	0	0	0	0	0	0	0	0	0	0	0	0	0	0
chr1_155957713_155958396_-	ENSG00000116584.17	ARHGEF2	chr1	155957713	155958396	-	ENST00000462460.6	17	16	0	0	0	0	0	0	0	0	0.548928	0	0.251606	0	0	0	0.241586	0	0	0	0	0	0	0	0	0	0	0	0.297039	0	0	0	0	0	0.269653	0	0	0	1.45477	0	0	0
chr1_155954902_155958396_-	ENSG00000116584.17	ARHGEF2	chr1	155954902	155958396	-	ENST00000462460.6	18	16	0	0	0	0	0	0	0	0	0	0	0	0	0	0	0	0	0	0	0	0	0	0	0	0	0	0	0	0	0	0	0	0	0	0	0	0	0	0	0	0
chr1_155951741_155969300_-	ENSG00000116584.17	ARHGEF2	chr1	155951741	155969300	-	ENST00000462460.6	22	6	0	0	0	0	0	0	0	0	0	0	0	0	0	0	0	0	0	0	0	0	0	0	0	0	0	0	0	0	0	0	0	0	0	0	0	0	0	0	0	0
chr1_155951483_155969300_-	ENSG00000116584.17	ARHGEF2	chr1	155951483	155969300	-	ENST00000462460.6	23	6	0	0	0	0	0	0	0	0	0	0	0	0	0	0	0	0	0	0	0	0	0	0	0	0	0	0	0	0	0	0	0	0	0	0	0	0	0	0	0	0
chr1_155950299_155963183_-	ENSG00000116584.17	ARHGEF2	chr1	155950299	155963183	-	ENST00000462460.6	25	12	0	0	0	0	0	0	0	0	0	0	0	0	0	0	0	0	0	0	0	0	0	0	0	0	0	0	0	0	0	0	0	0	0	0	0	0	0	0	0	0
chr1_155950299_155958396_-	ENSG00000116584.17	ARHGEF2	chr1	155950299	155958396	-	ENST00000462460.6	25	16	0	0	0	0	0	0	0	0	0	0	0	0	0	0	0	0	0	0.620888	0	0	0	0	0	0	0	0	0	0	0	0	0	0	0	0	0	0	0	0	0	0
chr1_155950299_155954969_-	ENSG00000116584.17	ARHGEF2	chr1	155950299	155954969	-	ENST00000462460.6	25	18	0	0	0	0	0	0	0	0	0	0	0	0	0	0	0	0	0	0	0	0	0	0	0	0	0	0	0	0	0	0.280616	0	0	0	0	0	0	0	0	0	0
chr1_26729651_26732792_+	ENSG00000117713.19	ARID1A	chr1	26729651	26732792	+	ENST00000430799.7	2	4	1.28874	0.343846	0.494341	0	0.224177	2.08268	1.45609	0.45884	0.281873	1.17668	0	0.998581	0	0.878357	0	0.332188	1.94312	1.24178	4.20962	0.228857	0.786132	0.902893	0	4.593	0.583509	0.968959	2.77898	1.18896	0	2.6683	0.279556	0	0	0.712388	0.27011	0.710375	0.292743	1.51639	0	0
chr1_26729651_26763285_+	ENSG00000117713.19	ARID1A	chr1	26729651	26763285	+	ENST00000430799.7	2	8	0	0	0	0	0	0	0	0	0	0	0	0	0	0	0	0	0	0	0	0	0.234719	0	0	0	0	0	0	0	0	0	0	0	0	0	0	0	0	0	0	0
chr1_26731152_26732792_+	ENSG00000117713.19	ARID1A	chr1	26731152	26732792	+	ENST00000430799.7	3	4	0	0	0	0	0	0	0	0	0	0	0	0	0	0	0	0	0	0	0	0	0	0	0	0	0	0	0	0.176584	0	0	0	0	0	0	0	0	0	0	0	0
chr1_26760856_26763285_+	ENSG00000117713.19	ARID1A	chr1	26760856	26763285	+	ENST00000430799.7	5	8	0	0.343846	0.326655	0	0	0	0.320729	0	0	0	0.286956	0	0	0.374527	0	0	0	0.584363	0	0	0.234719	0.749339	0.276394	0	0	0	0.496832	0	0	0	0	0	0.269653	0.261939	0.478793	0.582353	0.740046	1.01404	0.688377	0
chr1_26760856_26766366_+	ENSG00000117713.19	ARID1A	chr1	26760856	26766366	+	ENST00000430799.7	5	9	0	0	0	0	0	0	0	0	0	0	0	0	0	0	0	0	0	0	0	0	0	0	0	0	0	0	0	0	0	0	0	0	0	0	0	0	0	0	0	0
chr1_26760856_26775707_+	ENSG00000117713.19	ARID1A	chr1	26760856	26775707	+	ENST00000430799.7	5	19	0	0	0	0	0	0	0	0	0	0	0	0	0	0	0	0	0	0	0	0	0	0	0	0	0	0.468839	0	0	0	0	0	0	0	0	0	0	0	0	0	0
chr1_26766221_26766566_+	ENSG00000117713.19	ARID1A	chr1	26766221	26766566	+	ENST00000430799.7	9	10	0	0	0	0	0	0	0	0	0	0	0	0	0	0	0	0	0	0	0	0	0	0	0	0	0	0	0	0	0	0	0	0	0	0	0	0	0	0	0.344189	0
chr1_26766221_26767999_+	ENSG00000117713.19	ARID1A	chr1	26766221	26767999	+	ENST00000430799.7	9	11	0	0	0	0	0	0	0	0	0	0	0	0	0	0	0	0	0	0	0	0	0	0	0	0	0	0	0	0.176584	0	0	0	0	0	0	0	0	0	0	0	0
chr1_26771119_26775707_+	ENSG00000117713.19	ARID1A	chr1	26771119	26775707	+	ENST00000430799.7	12	19	0	0	0	0	0	0	0	0	0	0	0	0	0	0	0	0.291251	0	0	0	0	0	0	0	0	0	0	0	0	0	0	0	0	0	0	0	0	0	0	0	0
chr1_26772500_26775220_+	ENSG00000117713.19	ARID1A	chr1	26772500	26775220	+	ENST00000430799.7	13	18	0	0	0	0	0	0	0	0	0	0	0	0	0	0	0	0	0	0	0	0	0	0	0	0	0	0	0	0	0	0	0	0	0	0	0	0	0	0	0	0
chr1_26773346_26773717_+	ENSG00000117713.19	ARID1A	chr1	26773346	26773717	+	ENST00000430799.7	15	16	0	0	0	0	0	0	0	0	0	0	0	0	0	0	0	0	0	0	0	0	0	0	0	0	0	0	0	0	0	0	0	0	0	0	0	0	0.447303	0	0	0
chr1_235257160_235260752_-	ENSG00000054267.21	ARID4B	chr1	235257160	235260752	-	ENST00000421364.5	4	3	0	0	0	0	0	0	0	0	0	0	0	0	0	0.168313	0	0	0	0	0	0	0	0	0	0	0	0	0	0	0	0	0	0	0	0	0	0	0	0	0	0
chr1_235255660_235260752_-	ENSG00000054267.21	ARID4B	chr1	235255660	235260752	-	ENST00000421364.5	5	3	0	0	0.494341	0	0	0	0	0	0	0	0	0	0	0	0	0	0	0	0	0	0	0	0	0	0	0	0	0	0	0	0	0	0	0	0	0	0	0	0	0
chr1_235252730_235260752_-	ENSG00000054267.21	ARID4B	chr1	235252730	235260752	-	ENST00000421364.5	6	3	0	0	0	0	0.535785	0	0	0	0	0	0	0	0	0	0	0	0	0	0	0	0.958564	0.170444	0.276394	0	0	0	0	0.26688	0	0	0	0	0	0	0	0	0	0.183442	0	0
chr1_235252730_235257225_-	ENSG00000054267.21	ARID4B	chr1	235252730	235257225	-	ENST00000421364.5	6	4	0	0	0	0	0	0	0	0	0	0	0	0	0	0	0	0	0	0	0	0	0	0	0	0	0	0	0	0	0	0	0	0	0	0	0	0	0	0	0.344189	0
chr1_235246420_235260752_-	ENSG00000054267.21	ARID4B	chr1	235246420	235260752	-	ENST00000421364.5	7	3	0.263777	0	0	0.604644	1.4749	0.217621	0.864499	0	0	0.581	0.251606	0.722821	0	0.168313	0	0	0	0.292181	0	0	1.18344	0.545114	0.587232	0.584256	0	0	0.594077	0	0.297656	0	0	0	0	0	0	1.16471	0	0.366884	1.06334	0
chr1_235246420_235255750_-	ENSG00000054267.21	ARID4B	chr1	235246420	235255750	-	ENST00000421364.5	7	5	0	0	0	0	0.224177	0	0	0	0	0	0	0	0	0	0	0	0	0	0	0	0	0	0	0	0	0	0	0	0	0	0	0	0	0	0	0	0	0	0	0
chr1_235246420_235252809_-	ENSG00000054267.21	ARID4B	chr1	235246420	235252809	-	ENST00000421364.5	7	6	0	0	0	0	0	0	0	0	0	0	0	0	0	0	0	0	0	0	0	0	0.262044	0	0	0	0	0	0	0	0	0	0	0	0	0	0	0	0	0	0	0
chr1_235240313_235260752_-	ENSG00000054267.21	ARID4B	chr1	235240313	235260752	-	ENST00000421364.5	8	3	0	0	0	0	0.311608	0	0.216125	0	0	0	0.251606	0.24094	0	0.187263	0	0	0	0	1.45631	0	0	0	0.863627	0	0	0	0.297039	0.3276	0	0	0	0.252936	0.341285	0.340425	0	0	0	0	0.703765	0
chr1_235240313_235257225_-	ENSG00000054267.21	ARID4B	chr1	235240313	235257225	-	ENST00000421364.5	8	4	0	0	0	0	0	0	0	0	0.267055	0	0	0	0	0	0	0	0	0	0	0	0.479282	0	0	0	0	0	0	0	0	0	0	0	0	0	0	0	0	0	0	0
chr1_235240313_235252809_-	ENSG00000054267.21	ARID4B	chr1	235240313	235252809	-	ENST00000421364.5	8	6	0	0	0	0	0	0	0	0	0	0	0	0	0	0	0	0	0	0	0	0	0	0.357779	0	0	0	0	0	0	0	0	0	0	0	0	0	0	0	0	0	0
chr1_235240313_235246511_-	ENSG00000054267.21	ARID4B	chr1	235240313	235246511	-	ENST00000421364.5	8	7	0	0	0	0.673104	0	0	0	0	0	0	0	0.318948	0.285577	0	0.241586	0	0	0	0.228832	0	0	0	0	0	0	0.645973	0	0	0	0	0	0	0	0	0	0	0	0.16834	0.359576	0
chr1_235234413_235260752_-	ENSG00000054267.21	ARID4B	chr1	235234413	235260752	-	ENST00000421364.5	9	3	0	0	0	0	0	0	0	0	0	0	0	0	0	0	0	0	0	0.422015	0	0	0	0	0	0	0	0	0	0	0	0	0	0	0	0	0	0	0	0.338014	1.03257	0
chr1_235234413_235257225_-	ENSG00000054267.21	ARID4B	chr1	235234413	235257225	-	ENST00000421364.5	9	4	0	0	0	0	0.401187	0	0	0	0	0	0	0	0	0	0	0.332188	0	0	0	0	0	0	0	0	0	0	0	0.3276	0	0	0	0	0	0	0	0	0	0	0	0
chr1_235234413_235252809_-	ENSG00000054267.21	ARID4B	chr1	235234413	235252809	-	ENST00000421364.5	9	6	0	0	0	0	0	0	0	0	0	0	0	0	0	0.187263	0	0	0	0	0	0	0	0	0	0.292128	0	0	0	0	0	0	0	0	0	0	0	0	0	0	0	0
chr1_235231113_235257225_-	ENSG00000054267.21	ARID4B	chr1	235231113	235257225	-	ENST00000421364.5	10	4	0	0	0	0	0	0	0	0	0	0	0	0	0	0	0	0	0	0	0	0	0	0	0	0	0	0	0	0	0	0	0	0	0	0	0	0.432068	0	0	0	0
chr1_235229231_235260752_-	ENSG00000054267.21	ARID4B	chr1	235229231	235260752	-	ENST00000421364.5	11	3	0	0	0	0	0	0	0	0	0	0	0	0	0	0	0	0.302829	0	0.422015	0	0	0	0	0	0	0	0.322986	0	0.176584	0	0	0	0	0.225925	0	0	0	0	0	0	0
chr1_235229231_235257225_-	ENSG00000054267.21	ARID4B	chr1	235229231	235257225	-	ENST00000421364.5	11	4	0	0	0	0	0	0	0	0	0	0	0	0	0	0	0	0	0	0	0	0	0	0	0	0	0	0	0	0.26688	0	0	0	0	0	0	0	0	0	0	0	0
chr1_235229231_235255750_-	ENSG00000054267.21	ARID4B	chr1	235229231	235255750	-	ENST00000421364.5	11	5	0	0	0	0	0	0	0	0	0	0	0	0	0	0	0	0	0	0	0	0	0	0	0	0	0	0	0.297039	0	0	0	0	0	0	0	0	0	0	0	0	0
chr1_235229231_235246511_-	ENSG00000054267.21	ARID4B	chr1	235229231	235246511	-	ENST00000421364.5	11	7	0	0	0	0	0	0	0	0	0	0	0	0	0	0	0	0	0	0	0	0	0	0	0	0	0	0	0	0	0	0	0	0	0	0	0	0	0	0	0	0
chr1_235229231_235240451_-	ENSG00000054267.21	ARID4B	chr1	235229231	235240451	-	ENST00000421364.5	11	8	0	0	0	0	0	0	0	0	0	0	0	0	0	0	0	0	0	0	0	0	0	0	0	0	0	0.968959	0	0	0	0	0	0	0	0	0	0	0	0	0	0
chr1_235229231_235231189_-	ENSG00000054267.21	ARID4B	chr1	235229231	235231189	-	ENST00000421364.5	11	10	0	0.306634	0	0	0	0	0	0.553919	0	0	0	0	0	0	0	0.908487	0.273746	0	0	0.505539	0	0	1.32598	0	0	0	0.298068	0	0	0	0	0	0.495578	0	0	0.432068	0	0	0	0
chr1_235224703_235252809_-	ENSG00000054267.21	ARID4B	chr1	235224703	235252809	-	ENST00000421364.5	12	6	0	0	0	0	0	0	0	0	0	0	0	0	0	0	0	0	0	0	0	0	0	0	0	0	0	0	0	0	0	0	0	0	0	0	0	0	0	0	0	0
chr1_235223166_235257225_-	ENSG00000054267.21	ARID4B	chr1	235223166	235257225	-	ENST00000421364.5	13	4	0	0	0	0	0	0	0	0	0	0	0	0	0	0	0	0	0	0	0	0.228857	0	0	0	0	0	0	0	0	0	0	0	0	0	0	0	0	0	0	0	0
chr1_235223166_235240451_-	ENSG00000054267.21	ARID4B	chr1	235223166	235240451	-	ENST00000421364.5	13	8	0	0	0	0	0	0	0	0	0	0	0	0	0	0	0	0	0.547492	0	0	0	0	0	0	0	0	0	0	0	0	0	0	0	0	0	0	0	0	0	0	0
chr1_235223166_235231189_-	ENSG00000054267.21	ARID4B	chr1	235223166	235231189	-	ENST00000421364.5	13	10	0	0.406923	0.406021	0	0	0	0	0	0	0	0	0	0	0	0	0.291251	0	0	0	0	0	0	0.662992	0	0	0	0	0	0	0	0	0	0	0.261939	0	0	0	0	0	0
chr1_235223166_235229385_-	ENSG00000054267.21	ARID4B	chr1	235223166	235229385	-	ENST00000421364.5	13	11	0	0	0	0	0	0	0	0	0.267055	0	0	0	0	0	0	0.291251	0	0	0	0	0	0	0	0	0	0	0	0	0	0	0	0	0.682569	0	0.478793	0.227166	0	0	0.703765	0
chr1_235221565_235240451_-	ENSG00000054267.21	ARID4B	chr1	235221565	235240451	-	ENST00000421364.5	14	8	0	0	0	0	0.401187	0	0	0	0	0	0	0	0	0	0	0	0	0	0	0	0	0	0	0	0	0	0	0	0	0	0	0	0	0	0	0	0	0	0	0
chr1_235221565_235231189_-	ENSG00000054267.21	ARID4B	chr1	235221565	235231189	-	ENST00000421364.5	14	10	0	0	0	0	0	0	0	0	0	0	0	0	0	0	0	0	0	0	0.228832	0	0	0	0	0	0	0	0	0	0	0	0	0	0	0	0	0	0	0	0	0
chr1_235221565_235229385_-	ENSG00000054267.21	ARID4B	chr1	235221565	235229385	-	ENST00000421364.5	14	11	0.241694	0	0	0	0	0	0	0	0	0	0	0	0	0	0	0	0	0	0	0	0	0	0	0	0	0	0	0	0	0	0	0	0	0	0	0	0	0	0	0
chr1_235219793_235260752_-	ENSG00000054267.21	ARID4B	chr1	235219793	235260752	-	ENST00000421364.5	16	3	0	0.613268	0	0	0	0	0	0	0	0	0.503213	0	1.87171	0	0	0	0.547492	0	0	0	0	0	0	0.399049	0	0	0	0	0	0	0	2.36786	0	0	0	0.216034	0	0.85947	0	0
chr1_235219793_235252809_-	ENSG00000054267.21	ARID4B	chr1	235219793	235252809	-	ENST00000421364.5	16	6	0	0	0	0	0	0	0	0	0	0	0	0	0	0	0	0	0	0	0	0	0	0	0	0	0	0	0	0	0	0	0	0	0	0	0	0	0	0	0	0
chr1_235219793_235246511_-	ENSG00000054267.21	ARID4B	chr1	235219793	235246511	-	ENST00000421364.5	16	7	0	0	0	0	0	0	0	0	0	0	0	0	0	0	0	0	0	0	0	0	0	0	0	0	0	0	0	0	0	0	0	0	0	0	0	0	0	0	0	0.364473
chr1_235219793_235240451_-	ENSG00000054267.21	ARID4B	chr1	235219793	235240451	-	ENST00000421364.5	16	8	0	0.343846	0	0	0	0.388474	0	0.414318	0	0	0	0	0	0	0	0	0.273746	0	0	0	0	0	0	0	0	0	0	0	0	0	0	0	0	0	0.257402	0	0	0	0	0
chr1_235219793_235234492_-	ENSG00000054267.21	ARID4B	chr1	235219793	235234492	-	ENST00000421364.5	16	9	0	0	0	0	0	0	0	0	0	0	0	0	0	0	0	0	0	0	0.291262	0	0	0	0	0	0	0	0.297039	0	0	0	0	0	0	0	0	0	0	0	0	0
chr1_235219793_235231189_-	ENSG00000054267.21	ARID4B	chr1	235219793	235231189	-	ENST00000421364.5	16	10	0	0	0	0	0	0	0.216125	0	0	0	0	0	0	0	0	0.302829	0	0	0	0	0	0	0	0	0	0	0	0	0	0	0	0.252936	0	0	0	0	0	0	0	0
chr1_235219793_235229385_-	ENSG00000054267.21	ARID4B	chr1	235219793	235229385	-	ENST00000421364.5	16	11	0	0	0	0	0.311608	0	0	0	0	0	0	0	0	0	0.559125	0	0	0	0	0	0	0	0	0	0	0	0	0.353169	0	0	0	0	0	0	0	0	0	0	0	0
chr1_235219793_235224775_-	ENSG00000054267.21	ARID4B	chr1	235219793	235224775	-	ENST00000421364.5	16	12	0	0	0	0	0	0	0	0	0	0	0	0	0	0	0	0	0	0	0	0	0	0	0	0	0	0	0	0	0	0	0	0	0	0	0	0	0	0.338014	0	0
chr1_235219793_235223260_-	ENSG00000054267.21	ARID4B	chr1	235219793	235223260	-	ENST00000421364.5	16	13	0	0	0	0	0	0	0	0	0	0	0	0	0	0	0	0.302829	0	0	0	0	0	0	0	0	0	0	0	0	0	0	0	0	0	0	0	0	0	0	0	0
chr1_235219793_235221662_-	ENSG00000054267.21	ARID4B	chr1	235219793	235221662	-	ENST00000421364.5	16	14	0	0	0	0	0	0	0	0	0	0	0	0	0	0	0	0	0	0	0	0	0	0	0	0	0	0	0	0	0	0	0	0	0	0	0	0	0.292743	0	0	0
chr1_235213769_235246511_-	ENSG00000054267.21	ARID4B	chr1	235213769	235246511	-	ENST00000421364.5	17	7	0	0	0	0	0	0	0	0	0	0	0	0	0	0	0	0	0	0	0.457664	0	0	0	0	0	0	0	0	0	0	0	0	0	0	0	0	0	0	0	0	0
chr1_235213769_235240451_-	ENSG00000054267.21	ARID4B	chr1	235213769	235240451	-	ENST00000421364.5	17	8	0	0	0	0	0.712794	0	0	0	0.53411	0	0	0	0	0	0	0.302829	0	0	0	0	0	0	0.331496	0	0	0.432484	0	0.443465	0	0	0	0.597308	0.451851	0	0	0	0	0	0	0
chr1_235213769_235224775_-	ENSG00000054267.21	ARID4B	chr1	235213769	235224775	-	ENST00000421364.5	17	12	0	0	0	0	1.65191	0	0	0	0	0	0	0	0	0	0	0	0	0	0	0	0	0	0	0.292128	0	0	0	0	0	0	0	1.28951	0	0	0	0	0	0	0	0
chr1_235213769_235221662_-	ENSG00000054267.21	ARID4B	chr1	235213769	235221662	-	ENST00000421364.5	17	14	0	0	0	0	0	0	0	0.553919	0	0	0	0	0.285577	0	0	0	0	0	0.291262	0	0	0	0.276394	0	0	0	0	0	0	0	0	0	0	0	0	0.216034	0	0	0	0
chr1_235213769_235214026_-	ENSG00000054267.21	ARID4B	chr1	235213769	235214026	-	ENST00000421364.5	17	17	0	0	0	0	0	0	0	0	0	0	0	0	0	0	0	0	0	0.292181	0	0.252769	0	0	0	0	0	0	0	0	0	0	0	0	0	0	0	0	0	0	0	0
chr1_235196031_235224775_-	ENSG00000054267.21	ARID4B	chr1	235196031	235224775	-	ENST00000421364.5	18	12	0	0	0	0	0	0	0	0	0	0	0	0	0	0	0	0	0	0	0	0	0	0	0	0	0	0	0	0	0	0	0	0	0	0.188509	0	0	0	0.16834	0	0
chr1_235196031_235221662_-	ENSG00000054267.21	ARID4B	chr1	235196031	235221662	-	ENST00000421364.5	18	14	0	0	0	0	0	0	0	0	0	0	0	0	0	0	0	0	0	0	0	0	0	0	0	0	0	0	0	0	0	0	0	0	0	0	0	0	0	0	0	0
chr1_235196031_235214026_-	ENSG00000054267.21	ARID4B	chr1	235196031	235214026	-	ENST00000421364.5	18	17	0	0	0	0	0	0	0	0	0	0	0	0	0	0	0	0	0	0	0	0	0	0	0	0	0	0	0	0	0	0	0	0	0	0	0	0	0	0	0	0
chr1_235194013_235260752_-	ENSG00000054267.21	ARID4B	chr1	235194013	235260752	-	ENST00000421364.5	19	3	0	0	0	0	0.224177	0	0	0	0	0	0	0	0	0	0	0	0	0	0	0	0	0	0	0	0	0	0	0	0	0	0	0	0	0	0	0	0	0	0	0
chr1_235194013_235252809_-	ENSG00000054267.21	ARID4B	chr1	235194013	235252809	-	ENST00000421364.5	19	6	0	0	0	0	0	0	0	0	0	0	0	0	0	0	0	0	0	0	0	0	0	0	0	0	0	0	0	0	0	0	0	0	0	0	0	0	0	0	0	0
chr1_235194013_235240451_-	ENSG00000054267.21	ARID4B	chr1	235194013	235240451	-	ENST00000421364.5	19	8	0	0	0	0	0	0	0	0	0	0	0	0	0	0	0	0	0	0	0	0	0	0	0	0	0	0	0	0	0	0	0	0	0	0.188509	0	0	0	0	0	0
chr1_235194013_235224775_-	ENSG00000054267.21	ARID4B	chr1	235194013	235224775	-	ENST00000421364.5	19	12	0	0	0.326655	0	0	0	0	0	0	0	0	0	0	0	0	0	0	0	0	0	0	0	0	0	0	0	0	0	0	0	0	0	0	0.340425	0	0	0	0	0	0
chr1_235194013_235221662_-	ENSG00000054267.21	ARID4B	chr1	235194013	235221662	-	ENST00000421364.5	19	14	0	0	0	0	0	0	0	0	0.84562	0	0	0	0	0	0	0	0	0	0	0	0	0	0	0	0	0	0	0.26688	0	0	0	0	0	0	0	0	0	0	0	0
chr1_235194013_235220545_-	ENSG00000054267.21	ARID4B	chr1	235194013	235220545	-	ENST00000421364.5	19	15	0.270788	0	0	0	0	0	0	0	0	0	0	0	0	0	0	0	0	0	0	0	0	0	0	0	0	0	0	0	0	0	0	0	0	0	0	0	0	0	0	0
chr1_235194013_235214026_-	ENSG00000054267.21	ARID4B	chr1	235194013	235214026	-	ENST00000421364.5	19	17	0	0	0	0	0.311608	0.474508	0	0	0	0	0	0	0	0	0.316699	0.302829	0	0	0	0	0	0	0	0	0.583509	0	0.594077	0	0	0	0	0	0.341285	0	0	0	0	0	0	0
chr1_235194013_235196115_-	ENSG00000054267.21	ARID4B	chr1	235194013	235196115	-	ENST00000421364.5	19	18	0	0.613268	0	0	0	0	0	0	0	0	0	0	0	0	0	0	0	0	0	0	0	0	0	0	0	0	0	0	0	0	0	0	0	0	0	0.216034	0	0	0	0
chr1_235181585_235260752_-	ENSG00000054267.21	ARID4B	chr1	235181585	235260752	-	ENST00000421364.5	20	3	0	0	0	0	0	0	0	0	0	0	0	0	0	0	0	0	0	0	0	0	0	0	0	0	0	0	0	0	0	0	0	0	0	0	0	0	0	0	0	1.01224
chr1_235181585_235240451_-	ENSG00000054267.21	ARID4B	chr1	235181585	235240451	-	ENST00000421364.5	20	8	0	0	0	0	0	0	0	0	0	0	0	0	0	0	0	0	0	0	0	0	0	0	0	0	0	0	0	0	0	0	0	0	0	0	0	0	0	0	0	0
chr1_235181585_235220545_-	ENSG00000054267.21	ARID4B	chr1	235181585	235220545	-	ENST00000421364.5	20	15	0	0	0	0	0	0	0	0	0	0	0	0	0	0	0	0	0	0	0	0	0	0	0	0	0	0	0	0	0	0	0	0	0	0	0	0	0	0	0	0
chr1_235181585_235214026_-	ENSG00000054267.21	ARID4B	chr1	235181585	235214026	-	ENST00000421364.5	20	17	0	0	0	0	0	0	0	0	0	0	0	0	0	0	0	0	0	0	0	0	0	0	0	0	0	0	0	0	0	0	0	0	0	0	0	0	0	0	0	0
chr1_235181585_235196115_-	ENSG00000054267.21	ARID4B	chr1	235181585	235196115	-	ENST00000421364.5	20	18	0	0.406923	0	0	1.29575	0	0	0	0	0	0	0	0	0	0	0.332188	0	0	0.811356	0.252769	0	0	0	0	0	0	0	0	0	0	0	0	0	0.188509	0	0	0	0	0.567498	0
chr1_235181585_235182793_-	ENSG00000054267.21	ARID4B	chr1	235181585	235182793	-	ENST00000421364.5	20	20	0	0	0.406021	0	0.401187	0	0	0	0	0	0	0	0	0.168313	0	0	0	0	0	0.252769	0	0.528223	0.331496	0	0	0	0.297039	0	0.352232	0	0	0	0	0.340425	0	0	0	0	0	1.01224
chr1_235177800_235182793_-	ENSG00000054267.21	ARID4B	chr1	235177800	235182793	-	ENST00000421364.5	21	20	0	0	0	0	0	0	0	0	0	0	0	0	0	0	0	0	0	0	0	0.91543	0	0	0	0	0	0	0	0	0	0	0	0	0	0	0	0	0	0	0	0
chr1_235175184_235246511_-	ENSG00000054267.21	ARID4B	chr1	235175184	235246511	-	ENST00000421364.5	23	7	0	0	0	0	0	0	0	0	0	0	0	0	0	0.373418	0	0	0	0	0	0	0	0	0	0	0	0	0	0	0	0	0	0	0	0	0	0	0	0	0	0
chr1_235175184_235221662_-	ENSG00000054267.21	ARID4B	chr1	235175184	235221662	-	ENST00000421364.5	23	14	0	0	0	0	0	0	0	0.276959	0	0	0	0	0.691854	0	0	0	0	0	0	0	0	0	0	0	0	0	0.596137	0.176584	0	0.500492	0	0	0	0	0	0	0	0	0	0
chr1_235175184_235214026_-	ENSG00000054267.21	ARID4B	chr1	235175184	235214026	-	ENST00000421364.5	23	17	0	0	0	0	0	0	0	0	0	0	0	0.318948	0.620102	0	0	0	0	0	0	0	0	0	0	0	0	0	0	0	0	0	0	0	0	0	0	0	0	0.16834	0	0
chr1_235175184_235196115_-	ENSG00000054267.21	ARID4B	chr1	235175184	235196115	-	ENST00000421364.5	23	18	0.270788	0	0	0	0	0	0	0.22942	0	0	0	0.438693	0.571154	0	0	0	0	0	0	0	0	0	0	0	0	0	0.298068	0	0	0	0.547682	0	0	0	0.772206	0.454332	0	0	0	0
chr1_235175184_235194211_-	ENSG00000054267.21	ARID4B	chr1	235175184	235194211	-	ENST00000421364.5	23	19	0	0	0	0	0	0	0	0	0	0	0	0	0	0	0	0	0	0	0	0	0	0	0	0	0	0	0	0	0	0	0	0	0	0	0	0	0.585486	0	0	0
chr1_235175184_235182793_-	ENSG00000054267.21	ARID4B	chr1	235175184	235182793	-	ENST00000421364.5	23	20	0	0	0	0	0.224177	0	0.216125	0	0	0	0	0.920574	1.65788	0	0	0.605658	0	0	0	0	0	0.528223	0	0.399049	0	0	0	0.176584	0	0.280616	0	0	0	0	0	0	0	0	0.344189	0
chr1_235172618_235214026_-	ENSG00000054267.21	ARID4B	chr1	235172618	235214026	-	ENST00000421364.5	24	17	0	0	0	0	0	0	0	0.45884	0	0	0	0	0	0	0	0	0	0	0	0	0	0	0	0	0	0	0	0	0	0	0	0	0	0	0	0	0	0	0	0
chr1_235172618_235196115_-	ENSG00000054267.21	ARID4B	chr1	235172618	235196115	-	ENST00000421364.5	24	18	0	0	0	0	0.712794	0	0	0.22942	0	0	0	0.438693	0	0	0	0	0	0	0	0	0	0	0.310838	0	0	0	0.496832	0	0	0	0	0	0	0	0	0.227166	0	0	0	0
chr1_235172618_235182793_-	ENSG00000054267.21	ARID4B	chr1	235172618	235182793	-	ENST00000421364.5	24	20	0	0	0	0	0	0	0.432249	0	0	0	0	0.318948	0	0.187263	0.316699	0	0	0	0	0	0	0	0	0	0	0	0	0	0	0	0	0	0	0	0	0	0	0	0	0
chr1_235172618_235175399_-	ENSG00000054267.21	ARID4B	chr1	235172618	235175399	-	ENST00000421364.5	24	23	0	0.613268	0	0	0	0	0	0	0	0	0	0	0	0	0	0	0	0	0	0	0	0	0	0	0	0	0	0	0	0	0	0	0	0	0	0	0	0	0	0
chr1_235172618_235172764_-	ENSG00000054267.21	ARID4B	chr1	235172618	235172764	-	ENST00000421364.5	24	24	0	0	0	0	0	0	0	0	0	0	0	0	0	0	0	0	0	0	0	0	0	0	0	0	0	0	0	0	0	0	0	0	0.269653	0	0	0	0	0	0	0
chr1_235160893_235161457_-	ENSG00000054267.21	ARID4B	chr1	235160893	235161457	-	ENST00000474953.5	8	7	0	0	0	0	0	0	0	0	0	0	0	0	0	0	0	0	0	0	0	0	0	0	0	0	0	0	0	0	0	0	0	0	0	0	0	0	0	0	0	0
chr1_235160511_235161457_-	ENSG00000054267.21	ARID4B	chr1	235160511	235161457	-	ENST00000474953.5	9	7	0	0	0	0	0	0	0	0	0	0	0	0	0	0	0	0	0	0	0	0	0	0	0	0	0	0	0	0	0	0	0	0	0	0	0	0	0	0	0	0
chr1_235152706_235161457_-	ENSG00000054267.21	ARID4B	chr1	235152706	235161457	-	ENST00000474953.5	11	7	0	0	0	0	0	0	0	0	0	0	0	0	0	0	0	0	0	0	0	0	0	0	0	0	0	0	0	0	0	0	0	0	0	0	0	0	0	0	0	0
chr1_235148404_235161457_-	ENSG00000054267.21	ARID4B	chr1	235148404	235161457	-	ENST00000474953.5	12	7	0	0	0	0	0	0	0	0	0	0	0	0	0	0	0	0	0	0	0	0	0	0	0	0	0	0	0	0	0	0	0	0.429836	0	0	0	0	0	0	0	0
chr1_235138091_235161457_-	ENSG00000054267.21	ARID4B	chr1	235138091	235161457	-	ENST00000474953.5	13	7	0	0	0	0	0.311608	0	0	0	0	0	0	0	0	0	0	0	0	0	0	0	0	0	0	0	0	0	0	0	0	0	0	0	0	0	0	0	0	0	0	0
chr1_235135652_235161457_-	ENSG00000054267.21	ARID4B	chr1	235135652	235161457	-	ENST00000474953.5	16	7	0	0	0	0	0	0	0	0	0	0	0	0	0	0	0	0	0	0	0	0	0	0	0	0	0	0	0	0	0	0.561233	0	0	0	0	0	0	0	0	0	0
chr1_202137965_202138448_-	ENSG00000143862.7	ARL8A	chr1	202137965	202138448	-	ENST00000272217.6	3	2	0	0	0	0	0	0	0	0	0	0	0	0	0	0	0	0	0	0	0	0	0	0	0	0	0	0	0.298068	0	0	0	0	0	0	0	0	0	0.267418	0	0	0
chr1_202135150_202138448_-	ENSG00000143862.7	ARL8A	chr1	202135150	202138448	-	ENST00000272217.6	6	2	0	0	0	0	0	0	0	0	0	0	0	0	0	0	0	0	0	0	0	0	0	0.187335	0	0	0	0	0	0.176584	0	0	0	0	0	0	0	0	0	0	0	0
chr1_202135150_202135800_-	ENSG00000143862.7	ARL8A	chr1	202135150	202135800	-	ENST00000272217.6	6	4	0	0	0	0	0	0	0	0	0	0	0	0	0	0	0	0	0	0.422015	0	0	0	0	0	0	0	0	0	0	0	0	0	0	0	0	0	0.648101	0	0.366884	0	0
chr1_150826543_150829980_-	ENSG00000143437.20	ARNT	chr1	150826543	150829980	-	ENST00000354396.6	13	11	0	0	0	0	0	0	0	0	0	0.581	0	0	0	0	0	0	0	0	0	0	0	0	0	0	0	0	0	0	0	0	0	0	0	0	0	0	0	0.183442	0	0
chr1_150823194_150829980_-	ENSG00000143437.20	ARNT	chr1	150823194	150829980	-	ENST00000354396.6	14	11	0	0	0	0	0	0	0	0	0.53411	0	0	0	0	0	0	0	0	0	0	0	0	0	0	0	0	0	0	0	0	0	0	0	0	0	0	0	0	0	0	0
chr1_150817361_150829980_-	ENSG00000143437.20	ARNT	chr1	150817361	150829980	-	ENST00000354396.6	16	11	0	0	0	0	0	0	0	0	0	0	0	0	0	0	0	0	0	0	0	0	0	0	0	0	0	0	0	0	0	0	0	0	0	0	0	0	0	0	0	0
chr1_150846263_150858460_-	ENSG00000143437.20	ARNT	chr1	150846263	150858460	-	ENST00000515192.5	5	3	0	0	0	0	0	0	0	0	0	0	0	0	0	0	0	0	0	0	0	0	0	0	0	0	0	0	0	0	0	0	0	0	0	0	0.478793	0	0	0	0	0
chr1_150836280_150839654_-	ENSG00000143437.20	ARNT	chr1	150836280	150839654	-	ENST00000515192.5	8	7	0	0	0	0	0	0	0	0	0	0	0	0	0	0	0	0	0	0	0.228832	0	0	0	0	0	0	0	0	0	0	0	0	0	0	0	0	0	0	0	0	0
chr1_150834538_150839654_-	ENSG00000143437.20	ARNT	chr1	150834538	150839654	-	ENST00000515192.5	9	7	0	0	0	0	0	0	0	0	0	0	0	0	0	0	0	0	0	0	0	0	0	0	0	0	0	0	0	0	0	0	0	0	0	0	0	0	0	0	0	0
chr1_150834538_150834640_-	ENSG00000143437.20	ARNT	chr1	150834538	150834640	-	ENST00000515192.5	9	9	0	0	0	0	0	0	0	0	0	0	0	0	0	0	0	0	0.273746	0	0	0	0	0	0	0	0	0	0	0	0	0	0	0	0	0	0	0	0	0	0	0
chr1_150831818_150858460_-	ENSG00000143437.20	ARNT	chr1	150831818	150858460	-	ENST00000515192.5	11	3	0	0	0	0	0	0	0	0	0	0	0	0	0	0	0	0	0	0	0	0	0	0	0	0	0	0	0	0	0	0	0	0	0	0	0	0	0	0	0	0
chr1_150831818_150839654_-	ENSG00000143437.20	ARNT	chr1	150831818	150839654	-	ENST00000515192.5	11	7	0	0	0	0	0	0	0	0	0	0	0	0	0	0	0	0	0	0	0	0	0	0	0	0	0	0	0	0	0	0	0	0	0	0	0	0	0	0	0	0
chr1_150831818_150836493_-	ENSG00000143437.20	ARNT	chr1	150831818	150836493	-	ENST00000515192.5	11	8	0	0	0	0	0	0	0	0	0	0	0.251606	0	0.285577	0	0	0	0	0	0	0	0	0	0	0	0	0	0	0	0	0	0	0	0	0	0	0	0	0	0	0
chr1_150831818_150832399_-	ENSG00000143437.20	ARNT	chr1	150831818	150832399	-	ENST00000515192.5	11	10	0	0	0	0	0	0	0	0	0	0	0	0	0	0	0	0	0	0	0	0	0	0	0	0	0	0	0	0	0	0	0	0	0	0	0	0	0	0	0	0
chr1_150829904_150831903_-	ENSG00000143437.20	ARNT	chr1	150829904	150831903	-	ENST00000515192.5	12	11	0	0	0	0	0	0	0	0	0	0	0	0	0	0	0	0	0	0	0	0	0	0.246697	0	0	0	0	0	0	0	0	0	0	0.225925	0	0	0	0	0	0	0
chr1_150829093_150834640_-	ENSG00000143437.20	ARNT	chr1	150829093	150834640	-	ENST00000515192.5	13	9	0	0	0	0	0	0	0	0	0	0	0	0	0	0	0	0	0	0	0	0	0	0	0	0	0	0	0	0	0	0	0	0	0	0	0	0	0	0	0	0
chr1_150826543_150852806_-	ENSG00000143437.20	ARNT	chr1	150826543	150852806	-	ENST00000515192.5	14	4	0	0	0	0	0	0	0	0	0	0	0	0	0	0	0	0	0	0	0	0	0	0.246697	0	0	0	0	0	0	0	0	0	0	0	0	0	0	0	0	0	0
chr1_150826543_150839654_-	ENSG00000143437.20	ARNT	chr1	150826543	150839654	-	ENST00000515192.5	14	7	0	0	0	0	0	0	0	0	0	0	0	0.24094	0	0	0	0	0	0	0	0	0	0	0	0	0	0	0	0	0	0	0	0	0.225925	0	0	0	0	0	0	0
chr1_150826543_150836493_-	ENSG00000143437.20	ARNT	chr1	150826543	150836493	-	ENST00000515192.5	14	8	0	0	0	0	0	0	0	0	0	0	0	0	0	0	0	0	0	0	0	0	0	0.246697	0	0	0	0	0	0	0	0	0	0	0	0	0	0	0	0	0	0
chr1_150826543_150834640_-	ENSG00000143437.20	ARNT	chr1	150826543	150834640	-	ENST00000515192.5	14	9	0	0	0	0	0	0	0	0	0	0	0.286956	0	0	0	0	0	0	0	0	0	0	0	0	0	0	0	0	0	0	0	0	0	0	0	0	0	0	0	0	0
chr1_150826543_150832399_-	ENSG00000143437.20	ARNT	chr1	150826543	150832399	-	ENST00000515192.5	14	10	0	0	0	0	0	0	0	0	0	0	0	0	0	0	0	0	0	0	0	0	0	0	0	0	0	0	0	0	0	0	0	0	0	0	0	0	0	0	0	0
chr1_150823194_150839654_-	ENSG00000143437.20	ARNT	chr1	150823194	150839654	-	ENST00000515192.5	15	7	0.270788	0	0	0	0	0	0	0	0	0	0	0	0	0	0	0	0	0	0	0	0	0	0	0	0.692705	0	0	0	0	0	0	0	0	0	0	0	0	0.16834	0	0
chr1_150823194_150836493_-	ENSG00000143437.20	ARNT	chr1	150823194	150836493	-	ENST00000515192.5	15	8	0	0	0	0	0	0	0	0	0	0	0	0	0	0	0	0	0	0	0	0	0.479282	0	0	0	0	0	0	0	0	0	0	0	0	0	0	0	0	0	0	0
chr1_150823194_150834640_-	ENSG00000143437.20	ARNT	chr1	150823194	150834640	-	ENST00000515192.5	15	9	0	0	0	0	0	0	0	0	0	0	0	0	0	0	0	0	0	0	0	0	0	0	0	0	0	0	0	0	0	0	0	0	0.225925	0	0	0	0	0	0	0
chr1_150823194_150826617_-	ENSG00000143437.20	ARNT	chr1	150823194	150826617	-	ENST00000515192.5	15	14	0.241694	0	0	0	0	0	0	0	0	0	0	0	0.285577	0.373972	0	0	0	0	0	0	0	0	0	0	0	0	0	0	0	0	0	0	0	0	0	0	0.560161	0	0.567498	0
chr1_150817920_150826617_-	ENSG00000143437.20	ARNT	chr1	150817920	150826617	-	ENST00000515192.5	16	14	0	0	0	0	0	0	0	0	0	0.629299	0	0	1.2402	0.168313	0.633398	0	0	1.86266	0.909903	0	0	0.170444	0	0	0	0	0.298068	0.3276	0.595312	0	0	0	0.225925	0.261939	0.27011	0	0	0.16834	0.344189	0
chr1_150817920_150823345_-	ENSG00000143437.20	ARNT	chr1	150817920	150823345	-	ENST00000515192.5	16	15	0.241694	0	0	0	0	0	0.216125	0	0	0	0	0	0	0.186709	0	0.291251	0	0	0	0	0	0	0	0	0	0	0	0	0	0.459022	0	0	0	0	0	0	0	0	0	0
chr1_150817082_150842468_-	ENSG00000143437.20	ARNT	chr1	150817082	150842468	-	ENST00000515192.5	18	6	0	0	0	0	0	0	0	0	0	0	0	0	0	0	0.241586	0	0	0	0	0	0	0	0	0	0	0	0	0	0	0	0	0	0	0	0	0	0	0	0	0
chr1_150817082_150834640_-	ENSG00000143437.20	ARNT	chr1	150817082	150834640	-	ENST00000515192.5	18	9	0	0	0	0	0	0	0	0	0	0	0	0	0	0	0	0	0	0	0	0	0	0	0	0	0	0	0	0	0	0	0	0	0	0	0	0	0	0	0	0
chr1_150816259_150823345_-	ENSG00000143437.20	ARNT	chr1	150816259	150823345	-	ENST00000515192.5	20	15	0	0	0	0	0	0	0	0	0	0	0	0	0	0	0	0	0	0	0	0	0	0.246697	0	0	0	0	0	0	0	0	0	0	0	0	0	0	0	0	0	0
chr1_150816259_150818030_-	ENSG00000143437.20	ARNT	chr1	150816259	150818030	-	ENST00000515192.5	20	16	0	0	0	0	0	0	0	0	0	0	0	0	0.691854	0	0	0	0	0	0	0	0	0	0	0	0	0	0	0	0	0	0	0	0	0	0	0	0	0	0	0
chr1_150814077_150818030_-	ENSG00000143437.20	ARNT	chr1	150814077	150818030	-	ENST00000515192.5	21	16	0	0	0	0	0	0	0	0	0	0	0	0	0	0	0	0	0	0	0	0	0	0.493394	0	0	0	0	0	0	0	0	0	0	0	0	0	0	0	0	0	0
chr1_150813172_150818030_-	ENSG00000143437.20	ARNT	chr1	150813172	150818030	-	ENST00000515192.5	22	16	0	0	0	0	0	0	0	0	0	0	0	0	0	0	0	0	0	0	0	0	0	0	0	0	0	0	0	0	0	0	0	0	0	0.188509	0	0	0	0	0	0
chr1_150813172_150813338_-	ENSG00000143437.20	ARNT	chr1	150813172	150813338	-	ENST00000515192.5	22	22	0	0	0	0	0	0	0	0	0	0	0	0	0	0	0	0	0	0	0	0	0	0	0	0	0	0	0	0	0	0	0	0	0	0	0	0	0	0	0.344189	0
chr1_230988320_230995984_+	ENSG00000173409.13	ARV1	chr1	230988320	230995984	+	ENST00000310256.6	2	4	0	0	0	0	0	0	0	0	0	0	0	0	0	0	0	0.332188	0	0	0	0	0	0	0	0	0	0	0	0	0	0	0	0	0	0	0	0	0	0	0.359576	0
chr1_230988320_230997267_+	ENSG00000173409.13	ARV1	chr1	230988320	230997267	+	ENST00000310256.6	2	5	0	0	0	0	0	0	0	0	0	0	0	0	0	0	0	0	0	0	0	0	0	0	0	0	0	0	0	0.3276	0	0	0.279556	0	0	0	0	0	0	0	0.719152	0
chr1_230995760_230997267_+	ENSG00000173409.13	ARV1	chr1	230995760	230997267	+	ENST00000310256.6	4	5	0	0	0	0	0	0	0	0	0	0	0	0	0	0	0	0	0	0	0.228832	0	0	0	0	0	0	0	0	0.176584	0.352232	0	0	0	0	0	0	0	0	0	0	0
chr1_23455881_23456194_-	ENSG00000088280.18	ASAP3	chr1	23455881	23456194	-	ENST00000336689.7	3	2	0	0	0	0	0	0	0	0	0	0	0.400444	0	0	0	0	0	0	0	0	0	0.234719	0	0.331496	0	0	0	0	0	0	0	0	0	0	0	0	0	0	0	0	0
chr1_23452697_23456194_-	ENSG00000088280.18	ASAP3	chr1	23452697	23456194	-	ENST00000336689.7	4	2	0	0	0	0	0	0	0	0	0	0	0	0	0	0	0	0	0	0	0	0	0	0	0	0	0	0	0	0	0.297656	0	0	0	0	0	0	0	0	0	0.719152	0
chr1_23451479_23456194_-	ENSG00000088280.18	ASAP3	chr1	23451479	23456194	-	ENST00000336689.7	5	2	0	0	0	0	0	0.256886	0	0	0	0	0	0	0	0	0	0	0	0	0	0	0	0	0	0	0	0	0	0	0	0	0	0	0	0	0	0	0	0	1.07873	0
chr1_23442186_23456194_-	ENSG00000088280.18	ASAP3	chr1	23442186	23456194	-	ENST00000336689.7	7	2	0	0	0	0	0	0	0	0	0	0	0	0	0	0	0	0	0	0	0	0	0	0	0	0	0	0	0	0	0	0	0	0	0	0	0	0	0	0	0.567498	0
chr1_23441387_23442271_-	ENSG00000088280.18	ASAP3	chr1	23441387	23442271	-	ENST00000336689.7	9	7	0	0	0	0	0	0	0	0	0	0	0	0	0	0	0	0	0	0	0	0	0	0	0	0	0	0	0	0	0	0	0	0.298654	0	0	0	0	0	0	0	0
chr1_23441102_23456194_-	ENSG00000088280.18	ASAP3	chr1	23441102	23456194	-	ENST00000336689.7	10	2	0	0	0	0	0	0	0	0	0	0	0	0	0	0	0	0	0	0	0	0	0	0	0	0	0	0	0	0.26688	0	0	0	0	0	0	0	0	0	0	0	0
chr1_155521100_155521618_-	ENSG00000116539.12	ASH1L	chr1	155521100	155521618	-	ENST00000368346.7	2	2	1.33291	0	0.653311	0.604644	3.07535	6.33074	0.432249	0.22942	0.548928	1.09477	1.86729	0.438693	0	0.186709	1.67738	1.54971	1.86719	1.13621	1.35672	1.21539	0	1.6174	0.662992	1.19715	0	0.432484	1.48828	1.2401	0.595312	1.04099	2.49314	0	0.225925	0.528934	2.30813	2.06224	3.61944	1.07045	4.536	0
chr1_155477886_155521618_-	ENSG00000116539.12	ASH1L	chr1	155477886	155521618	-	ENST00000368346.7	3	2	0	0	0	0	1.07372	0	0	0.968237	0	0	0	0.318948	0	0	0.316699	0.291251	0	0	0.811356	0.228857	0	0	0	0	0	0	0.496832	1.09866	0.561837	0	0	0.758807	0	0.450448	0	0	0	0	1.94425	1.01224
chr1_155477886_155482449_-	ENSG00000116539.12	ASH1L	chr1	155477886	155482449	-	ENST00000368346.7	3	3	0	0	0	0.673104	1.02655	0.770659	0.216125	0	0	0	0	0.24094	0	0	0.241586	0	0.263939	0	0.686496	0.228857	0	0	0.310838	0.399049	0	1.40652	0.594077	0	0	0.561233	0.279556	0.429836	0	0.450448	1.80393	0	0	0.338014	0	0
chr1_155459797_155521618_-	ENSG00000116539.12	ASH1L	chr1	155459797	155521618	-	ENST00000368346.7	4	2	0	0	0	0	0	0	0.255961	0	0	0	0	0	0	0	0	0	0	0	0	0	0	0	0	0.399049	0	0	0	0	0	0	0	0	0.225925	0	0	0	0	0	0	0
chr1_155459797_155482449_-	ENSG00000116539.12	ASH1L	chr1	155459797	155482449	-	ENST00000368346.7	4	3	0	0	0	0	0	0.217621	0	0	0	0	0.503213	0	0	0.168313	0	0	0	0	0.582524	0	0	0	0.276394	0	0.583509	0	0.496832	0	0	0	0	0	0	0.261939	0	0	0	0	0	0
chr1_155438327_155521618_-	ENSG00000116539.12	ASH1L	chr1	155438327	155521618	-	ENST00000368346.7	5	2	0	0	0	0	0.311608	0	0	0	0	0	0	0	0.285577	0	0	0.664375	0	0.584363	0	0	0	0	0	0	0	0	0	0	0	0	0	0	0	0	0.239396	0	0.267418	0	0	0.364473
chr1_155438327_155482449_-	ENSG00000116539.12	ASH1L	chr1	155438327	155482449	-	ENST00000368346.7	5	3	0	0	0	0	1.24858	0	0	0	0	0	0	0	0.285577	0.187263	0.559125	0	0	0	0	0	0	0	0.552789	0	0	0	0	0	0	0	0.279556	0	0	0.261939	0	0	0	0	0	0
chr1_155438327_155459898_-	ENSG00000116539.12	ASH1L	chr1	155438327	155459898	-	ENST00000368346.7	5	4	8.00639	9.41634	4.90831	5.71564	11.1567	10.2964	13.5204	3.58771	11.743	7.70833	4.86522	9.67958	8.89334	6.91874	14.6553	24.1663	8.47695	17.3356	27.9542	6.36139	7.06704	15.9903	16.6766	9.26746	1.96892	12.5247	3.1743	15.9495	14.4898	12.1496	12.0268	8.34188	12.9394	10.7212	13.0724	3.57448	4.38481	11.1127	17.2332	12.7095
chr1_155438327_155439068_-	ENSG00000116539.12	ASH1L	chr1	155438327	155439068	-	ENST00000368346.7	5	5	6.28439	5.75384	3.42505	6.99338	12.4541	6.46475	11.2217	4.50763	7.05219	4.61438	9.18444	9.20172	3.82657	5.64691	2.23398	14.7322	3.49986	9.79187	15.7383	2.77794	9.67984	3.22661	9.01422	4.88153	3.61025	5.78798	10.8168	12.4377	10.9142	5.89495	8.07862	2.04486	9.88221	5.30571	10.6869	3.7505	5.06678	15.1049	12.3715	2.38894
chr1_155415744_155521618_-	ENSG00000116539.12	ASH1L	chr1	155415744	155521618	-	ENST00000368346.7	6	2	0	0	0	0	0	0	0	0	0	0	0	0	0	0	0.241586	0	0	0	0	0	0	0	0	0	0	0	0	0	0	0	0	0	0	0	0	0	0	0	0	0
chr1_155415744_155482449_-	ENSG00000116539.12	ASH1L	chr1	155415744	155482449	-	ENST00000368346.7	6	3	0	0	0	0	0	0	0	0	0	0	0	0	0	0	0	0	0	0	0.457664	1.38026	0	0	0	0	0	0	0	0	0	0	0	0	0	0	0	0	0	0	0	0
chr1_155415744_155459898_-	ENSG00000116539.12	ASH1L	chr1	155415744	155459898	-	ENST00000368346.7	6	4	0	0	0.653311	0.673104	2.00854	1.60067	0.792815	0	0.281873	1.2586	0.503213	0.318948	0	0.373418	1.58349	1.21752	1.42918	0.714196	1.13602	0.758308	0.958564	1.3021	1.49218	0.983305	0	0.432484	0.993664	1.68356	0	0.688534	0.547682	0.850243	1.60209	0.86936	1.7658	0.710375	1.17097	0.676028	2.78428	0.728946
chr1_155415744_155439068_-	ENSG00000116539.12	ASH1L	chr1	155415744	155439068	-	ENST00000368346.7	6	5	0	0	0.494341	0	0	0	0.511922	0.553919	0	0	0.251606	0	0	0.187263	0	1.56128	0	0.422015	0.915328	0	0	0.170444	0	0	0.583509	0.937678	2.07927	0	0.595312	0.811479	0	0	0	0.261939	0	0	0	0.183442	0	0
chr1_155415744_155415923_-	ENSG00000116539.12	ASH1L	chr1	155415744	155415923	-	ENST00000368346.7	6	6	0.783271	0	0.406021	0	0.311608	0.692129	0	0	0	0	1.86729	0.24094	0	0.54284	0	0.291251	0.627556	0.620888	1.13874	0	0	1.85485	0.621676	0	0.583509	1.76629	0	0.26688	2.59955	0	0.559112	0	0.793135	0.785818	0	1.47989	1.00746	0.704898	0.359576	0
chr1_155395459_155482449_-	ENSG00000116539.12	ASH1L	chr1	155395459	155482449	-	ENST00000368346.7	7	3	0	0	0	0	0	0	0	0	0	0	0	0	0	0	0	0	0	0.292181	0	0	0	0	0	0	0	0	0	0	0	0	0	0	0	0	0	0	0	0	0	0
chr1_155395459_155459898_-	ENSG00000116539.12	ASH1L	chr1	155395459	155459898	-	ENST00000368346.7	7	4	0.241694	2.47	0.406021	1.34621	1.29575	0	0.962188	0.691278	1.35009	0	0.251606	0.24094	0.977431	0.168313	1.0423	1.96377	0.617749	1.00638	2.40233	0	0	0.77492	1.45086	0.292128	0	0.968959	0.595107	2.18775	1.65201	1.75026	0	0.505871	1.10652	1.04776	0.239396	2.05111	0.585486	2.05429	0	1.23506
chr1_155395459_155439068_-	ENSG00000116539.12	ASH1L	chr1	155395459	155439068	-	ENST00000368346.7	7	5	0	0	0.326655	0	0	0	0.216125	0	0	0	0	0	0	0.374527	0.241586	0.302829	0	0	0	0.252769	0.524088	0	0.331496	0.292128	0	0	0.496832	0.176584	0.649888	0.250246	0	0	0	0	0.514804	1.1247	0	0.183442	0	0
chr1_155395459_155415923_-	ENSG00000116539.12	ASH1L	chr1	155395459	155415923	-	ENST00000368346.7	7	6	0.241694	0	0	0	0.311608	0.823717	0	0	0	0	0	0	0	0	0.241586	0	0.263939	0.620888	0.452239	0	0	0	0	0.584256	0.692705	0	0	0	0	0	0	0	0.269653	0	0.27011	0.710375	0.267418	0.183442	0.359576	0.364473
chr1_155380043_155415923_-	ENSG00000116539.12	ASH1L	chr1	155380043	155415923	-	ENST00000368346.7	8	6	0	0	0	0	0	0	0	0	0	0	0	0	0	0	0	0	0	0	0	0	0	0	0	0	0	0	0	0	0	0	0	0	0	0	0	0	0	0	0	0
chr1_155378281_155459898_-	ENSG00000116539.12	ASH1L	chr1	155378281	155459898	-	ENST00000368346.7	10	4	0	0	0	0	0	0	0	0	0	0	0	0	0.345927	0	0	0.291251	0	0	0.686496	0	0	0	0	0	0	0	0	0	0	0	0	0	0	0	0	0	0	0	0	0
chr1_155378281_155439068_-	ENSG00000116539.12	ASH1L	chr1	155378281	155439068	-	ENST00000368346.7	10	5	0	0	0	0	0	0	0	0.276959	0	0	0	0	0	0.168313	0	0	0	0	0	0	0	0	0	0	0	0	0	0	0	0	0	0	0	0	0	0	0	0	0	0
chr1_155378281_155415923_-	ENSG00000116539.12	ASH1L	chr1	155378281	155415923	-	ENST00000368346.7	10	6	0.527554	2.06307	0.326655	0	1.20356	0.652864	0.767883	0.553919	0.267055	0	0.251606	0.679634	1.53718	0.373972	1.11741	0.605658	0	0.292181	0	0.228857	0.479282	0.493394	0.310838	0	0	0	1.18815	1.84015	1.54286	0	0	0.298654	0	0.565528	0	0	0.585486	0.8417	3.8784	0.728946
chr1_155378281_155395553_-	ENSG00000116539.12	ASH1L	chr1	155378281	155395553	-	ENST00000368346.7	10	7	0.791331	0	0	0	0.401187	0.217621	0	0	0.594723	0.581	0	0	0	0	0	0.664375	0	0	0.457664	0	0	0.246697	0	1.27225	0	0	0	0.353169	0	0	0	0.298654	0.269653	0.188509	1.45438	0	0	0	0	0
chr1_155370504_155459898_-	ENSG00000116539.12	ASH1L	chr1	155370504	155459898	-	ENST00000368346.7	12	4	0	0	0	0	0	0	0	0	0.281873	0	0	0.318948	0.345927	0	0	0	0	0	1.55757	0	0	0	0	0	0	0	0	0.533761	0	0	0	0.298654	1.17335	0	0.239396	0	0.447303	0	0	0
chr1_155370504_155439068_-	ENSG00000116539.12	ASH1L	chr1	155370504	155439068	-	ENST00000368346.7	12	5	0	0	0	0	0	0	0	0	0	0	0	0	0.285577	0	0	0.302829	0	0	0	0	0	0.187335	0	0	0	0	0	0	0	0	0	0	0	0	0	0	0	0	0	0
chr1_155370504_155415923_-	ENSG00000116539.12	ASH1L	chr1	155370504	155415923	-	ENST00000368346.7	12	6	0	0	0	0	0	0.256886	0	0.22942	0	0	0	0	1.72964	0	0.241586	0	0	0	0.22612	0	0	0	0.276394	0.876384	0	0	0	0	0	0	0.279556	0	0.269653	0.261939	0.27011	0	0	0.338014	0	0
chr1_155370504_155395553_-	ENSG00000116539.12	ASH1L	chr1	155370504	155395553	-	ENST00000368346.7	12	7	0.527554	0.343846	0	0	1.0244	0.217621	0	0.22942	0.548928	0	0	0.877386	0	0	0.241586	0.967204	0	0.620888	2.46476	1.58646	0.524088	0.493394	0.621676	0	0	0	0.595107	2.66636	0.561837	0	0	0.252936	0.539305	0.638958	0.993597	0	0	0.887005	2.28844	0
chr1_155370504_155370983_-	ENSG00000116539.12	ASH1L	chr1	155370504	155370983	-	ENST00000368346.7	12	11	0.791331	0.306634	0	0.604644	0.311608	0	0	1.24295	0	0	0	0	0	0.373418	0.483172	0.605658	1.61306	0	0.291262	0	0	0.927426	0	0.292128	0	0	0.298068	1.3344	0	0	1.09536	0	0	0.340425	0.779616	0.432068	0.534836	0.688462	1.25588	0
chr1_155360301_155459898_-	ENSG00000116539.12	ASH1L	chr1	155360301	155459898	-	ENST00000368346.7	13	4	0	0	0	0	0	0	0.432249	0	0	0	0	0	0	0	0	0	0	0	0	0	0	0	0	0	0	0	0	0	0	0	0	0	0	0	0	0	0	0	0	0
chr1_155360301_155415923_-	ENSG00000116539.12	ASH1L	chr1	155360301	155415923	-	ENST00000368346.7	13	6	0	0	0	0	0	0	0	0	0	0	0	0	0	0	0	0	0.263939	0	0	0	0	0	0	0	0	0	0	0	0	0	0	0	0	0.188509	0	0	0	0	0	0
chr1_155360301_155395553_-	ENSG00000116539.12	ASH1L	chr1	155360301	155395553	-	ENST00000368346.7	13	7	0	0	0	0	0	0	0	0.553919	0	0	0	0	0	0	0.241586	0	0	0	0.228832	0	0	0	0	0	0	0	0	0.982799	0	0	0	0	0.225925	0.450448	0.478793	0	0	0	0	0
chr1_155360301_155370983_-	ENSG00000116539.12	ASH1L	chr1	155360301	155370983	-	ENST00000368346.7	13	11	0	0	0	0	0	0	0	0	0	0	0	0	0	0	0	0.302829	0.35381	0	0	0	0	0	0	0	0	0	0	0	0	0	0	0	0	0	0	0	0	0	0	0
chr1_155357316_155415923_-	ENSG00000116539.12	ASH1L	chr1	155357316	155415923	-	ENST00000368346.7	15	6	0	0	0	0	0	0	0	0	0	0	0	0.24094	0	0	0	0	0	0	0	0	0	0	0.276394	0	0	0	0	0	0	0	0	0	0	0	0	0	0	0	0	0
chr1_155357316_155395553_-	ENSG00000116539.12	ASH1L	chr1	155357316	155395553	-	ENST00000368346.7	15	7	0.527554	0	0	0	0	0	0	0	0.594723	0	0	0	0	0	0	0	0	0	0	0	0	0	0	0	0	0	0	0	0	0	0	0	0	0	0	0	0	0	0	0
chr1_155357316_155370983_-	ENSG00000116539.12	ASH1L	chr1	155357316	155370983	-	ENST00000368346.7	15	11	0	0	0	0	0	0	0	0	0	0	0	0	0	0	0	0	0	0	0	0	0	0.170444	0	0	0	0	0	0	0	0	0	0	0	0	0	0	0.447303	0	0	0
chr1_155357316_155360409_-	ENSG00000116539.12	ASH1L	chr1	155357316	155360409	-	ENST00000368346.7	15	13	0	0	0	0	0	0	0	0	0	0	0	0	0	0	0	0	0	0.584363	0	0	0	0	0	0	0	0	0	0.176584	0	0	0	0	0	0	0	0	0	0	0	0
chr1_155357316_155357749_-	ENSG00000116539.12	ASH1L	chr1	155357316	155357749	-	ENST00000368346.7	15	14	1.05511	0	0	0	0	0	0	0	0	0	0	0	0	0	0	0	0	0.84403	0	0	0	0	1.24335	0	0	0	0	0	0	0	0	0	0	0	0	1.51224	0.267418	0	0	0
chr1_155354473_155415923_-	ENSG00000116539.12	ASH1L	chr1	155354473	155415923	-	ENST00000368346.7	16	6	0	0	0	0	0	0	0	0	0	0	0	0	0	0	0	0	0	0	0	0	0	0	0	0	0	0	0	0	0	0	0	0	0	0	0	0	0.267418	0	0	0
chr1_155354473_155370983_-	ENSG00000116539.12	ASH1L	chr1	155354473	155370983	-	ENST00000368346.7	16	11	0	0	0	0	0	0	0	0	0	0	0	0	0	0	0	0	0	0	0	0	0	0	0	0	0	0	0	0	0	0	0	0.252936	0	0	0	0	0	0	0	0
chr1_155354473_155360409_-	ENSG00000116539.12	ASH1L	chr1	155354473	155360409	-	ENST00000368346.7	16	13	0	0	0	0	0.401187	0	0	0	0	0	0	0	0	0	0	0	0	0	0	0	0	0	0	0	0	0	0	0	0	0	0	0	0	0	0	0	0	0	0	0
chr1_155354473_155357749_-	ENSG00000116539.12	ASH1L	chr1	155354473	155357749	-	ENST00000368346.7	16	14	0	0	0	0	0	0.652864	0	0	0	0	0	0	0	0	0	0	0	0	0	0	0	0	0	0	0	0	0	0	0	0	0	0	0	0	0	0	0	0	0	0.506118
chr1_155352706_155415923_-	ENSG00000116539.12	ASH1L	chr1	155352706	155415923	-	ENST00000368346.7	17	6	0	0	0	0	0.224177	0	0	0	0.267055	0	0	0	0	0	0.241586	0	0	0	0	0.252769	0	0	0.863627	0	0	0	0	0	0	0	0	0	0	0	0	0	0	0	0	0
chr1_155352706_155395553_-	ENSG00000116539.12	ASH1L	chr1	155352706	155395553	-	ENST00000368346.7	17	7	0	0	0	0	0	0	0	0	0.53411	0	0	0	0	0	0	0	0	0	0	0	0	0	0	0	0	0	0	0	0	0	0	0	0	0	0	0	0	0	0	0
chr1_155352706_155360409_-	ENSG00000116539.12	ASH1L	chr1	155352706	155360409	-	ENST00000368346.7	17	13	0	0	0	0.604644	0	0	0	0	0	0	0	0	0	0	0	0	0	0	0.452239	0	0	0	0	0	0	0	0	0	0	0.459022	0	0	0	0	0	0	0	0	0	0
chr1_155352706_155357749_-	ENSG00000116539.12	ASH1L	chr1	155352706	155357749	-	ENST00000368346.7	17	14	0	0	0.326655	0	0.448354	0	0	0	0	0	0	0	0.345927	0	0	0.302829	0.35381	0	0.228832	0	0	0.187335	0.310838	0	0	0.322986	0	0.26688	0	0	0	0	0	0.340425	0	0	0	0.16834	0	0
chr1_155352706_155354630_-	ENSG00000116539.12	ASH1L	chr1	155352706	155354630	-	ENST00000368346.7	17	16	0.270788	0	0	0	0.623215	0	0	0.22942	0.267055	0	0	0	0	0	0	0	0.263939	0	0.22612	0	0	0	0.310838	0	0.692705	0	0	0.504184	0.352232	0	0	0	0.341285	0.340425	0	0	0	0	1.28665	0
chr1_155349542_155415923_-	ENSG00000116539.12	ASH1L	chr1	155349542	155415923	-	ENST00000368346.7	18	6	0	0	0	0	0	0	0	0	0	0	0	0	0	0	0	0	0	0	0	0	0	0	0.552789	0	0	0	0	0	0	0	0	0	0	0	0	0	0	0	0	0
chr1_155349542_155357410_-	ENSG00000116539.12	ASH1L	chr1	155349542	155357410	-	ENST00000368346.7	18	15	0	0	0	0	0	0	0	0	0	0	0	0	0	0	0	0	0	0	0	0	0	0	0	0	0	0	0	0	0	0	0	0	0	0	0	0	0	0	0	0.364473
chr1_155349327_155415923_-	ENSG00000116539.12	ASH1L	chr1	155349327	155415923	-	ENST00000368346.7	19	6	0	0	0	0	0	0	0	0	0	0	0	0	0	0	0	0.291251	0	0	0	0	0	0	0	0	0	0	0	0	0	0	0	0	0	0	0	0	0	0	0	0
chr1_155349327_155354630_-	ENSG00000116539.12	ASH1L	chr1	155349327	155354630	-	ENST00000368346.7	19	16	0	0.306634	0	0	0	0	0.255961	0	0.281873	0	0	0	0	0	0	0	0	0	0	0	0	0	0	0	0	0	0	0	0	0	0	0	0	0	0	0.216034	0	0.366884	0.344189	0
chr1_155349327_155349596_-	ENSG00000116539.12	ASH1L	chr1	155349327	155349596	-	ENST00000368346.7	19	18	0.270788	0	0	0	0	0	0	0	0	0	0	0	0	0.168313	0	0	0	0	0	0	0	0	0.276394	0	0	0	0	0	0.297656	0.561233	0.279556	0	0	0	0.27011	0	0	0.366884	0.344189	0
chr1_155347656_155395553_-	ENSG00000116539.12	ASH1L	chr1	155347656	155395553	-	ENST00000368346.7	20	7	0	0	0	0	0	0	0	0	0	0	0	0	0	0	0	0	0	0	0	0	0	0	0	0	0	0	0	0	0	0	0	0	0	0	0	0	0	0	0	0
chr1_155347656_155360409_-	ENSG00000116539.12	ASH1L	chr1	155347656	155360409	-	ENST00000368346.7	20	13	0	0	0	0	0	0	0	0	0	0	0	0	0	0	0	0	0	0	0	0	0	0	0	0	0	0	0	0	0	0	0	0	0	0	0	0	0	0	0	0
chr1_155347656_155349596_-	ENSG00000116539.12	ASH1L	chr1	155347656	155349596	-	ENST00000368346.7	20	18	0	0	0	0	0.623215	0.256886	0	0.276959	0	0	0.400444	0	0	0	0	0	0	0	0	0	0	0	0	0	0	0	0	0	0	0	0.279556	0	0.539305	0.261939	0	0	0	0	0	0
chr1_155346383_155459898_-	ENSG00000116539.12	ASH1L	chr1	155346383	155459898	-	ENST00000368346.7	21	4	0	0	0	0	0	0	0	0	0	0	0	0	0	0	0	0	0	0	0	0	0	0	0	0	0	0	0	0	0	0	0	0	0	0	0	0	0	0.366884	0	0
chr1_155346383_155395553_-	ENSG00000116539.12	ASH1L	chr1	155346383	155395553	-	ENST00000368346.7	21	7	0	0	0	0	0	0	0	0	0	0	0	0	0	0	0	0.291251	0	0	0	0	0	0	0	0	0	0	0	0	0	0.229511	0	0	0	0	0	0	0	0	0	0
chr1_155346383_155360409_-	ENSG00000116539.12	ASH1L	chr1	155346383	155360409	-	ENST00000368346.7	21	13	0	0	0	0	0	0	0	0	0	0	0	0	0	0	0	0	0	0	0	0	0	0	0	0	0	0	0	0	0	0	0	0	0	0	0.239396	0	0	0	0	0
chr1_155346383_155354630_-	ENSG00000116539.12	ASH1L	chr1	155346383	155354630	-	ENST00000368346.7	21	16	0	0	0	0	0	0.256886	0	0	0	0	0	0	0	0	0	0	0	0	0	0	0	0	0	0	0	0	0	0	0	0	0	0	0	0	0	0	0	0	0.719152	0
chr1_155346383_155349596_-	ENSG00000116539.12	ASH1L	chr1	155346383	155349596	-	ENST00000368346.7	21	18	0	0	0	0	0	0	0	0	0	0	0	0	0	0	0	0	0	0	0	0	0	0	0	0	0	0	0	0	0	0	0	0	0	0.188509	0	0.216034	0	0	0	0
chr1_155346383_155347904_-	ENSG00000116539.12	ASH1L	chr1	155346383	155347904	-	ENST00000368346.7	21	20	0.263777	0.343846	0	0	0.401187	0	0	0	0.594723	0.581	0	0.24094	0	0.523889	0	0.291251	1.41937	0.292181	0.291262	0	0	0	0	0	0	0	0	0	0	0	0	0	0.539305	0	0	0.710375	0	0	0.688377	0
chr1_155343314_155459898_-	ENSG00000116539.12	ASH1L	chr1	155343314	155459898	-	ENST00000368346.7	24	4	0	0	0	0	0	0	0	0	0	0	0	0	0	0	0	0	0	0	0	0.228857	0	0	0	0	0	0	0	0	0	0	0	0	0	0	0	0	0	0	0	0
chr1_155343314_155354630_-	ENSG00000116539.12	ASH1L	chr1	155343314	155354630	-	ENST00000368346.7	24	16	0	0	0	0	0	0	0	0	0	0	0	0	0	0	0	0	0	0	0	0	0.234719	0	0	0	0	0	0	0	0	0	0	0	0	0	0	0	0	0	0	0
chr1_155343314_155349596_-	ENSG00000116539.12	ASH1L	chr1	155343314	155349596	-	ENST00000368346.7	24	18	0	0	0	0	0	0	0	0	0	0	0	0	0	0	0	0	0	0	0	0	0	0	0	0	0	0.322986	0	0	0	0	0	0	0	0	0	0	0	0	0	0
chr1_155343314_155347904_-	ENSG00000116539.12	ASH1L	chr1	155343314	155347904	-	ENST00000368346.7	24	20	0.541577	0	0	0	0	0	0	0	0	0	0.400444	0	0	0	0	0	0	0	0	0	0	0	0	0	0	0	0	0	0	0	1.09536	0	0	0	0	0	0	0	0	0
chr1_155343314_155346469_-	ENSG00000116539.12	ASH1L	chr1	155343314	155346469	-	ENST00000368346.7	24	21	0	0	0	0	0	0	0	0.22942	0	0	0	0	0	0	0	0	0	0	0	0	0	0	0	0	0	0	0	0	0.352232	0	0	0	0	0	0.239396	0	0	0.366884	0.344189	0
chr1_155341936_155459898_-	ENSG00000116539.12	ASH1L	chr1	155341936	155459898	-	ENST00000368346.7	25	4	0	0	0	0	0	0	0	0	0	0	0	0	0	0	0	0	0	0	0	0	0	0	0	0	0	0	0	0	0	0	0	0	0	0	0	0	0	0	0	0
chr1_155341936_155395553_-	ENSG00000116539.12	ASH1L	chr1	155341936	155395553	-	ENST00000368346.7	25	7	0	0	0	0	0	0	0	0	0	0	0	0	0	0	0	0	0	0	0	0	0	0	0	0	0	0	0	0	0	0	0	0	0	0	0	0	0	0	0	0
chr1_155341936_155347904_-	ENSG00000116539.12	ASH1L	chr1	155341936	155347904	-	ENST00000368346.7	25	20	0	0	0	0	0	0	0	0	0	0	0	0	0	0	0	0	0	0	0	0	0	0	0	0	0	0	0	0	0	0	0	0	0	0	0	0	0.447303	0	0	0
chr1_155341936_155346469_-	ENSG00000116539.12	ASH1L	chr1	155341936	155346469	-	ENST00000368346.7	25	21	0	0	0	0	0	0	0	0	0	0	0	0	0	0	0	0	0	0	0	0	0	0	0	0	0	0	0	0	0	0	0	0	0	0	0	0	0	0	0	0
chr1_155338089_155459898_-	ENSG00000116539.12	ASH1L	chr1	155338089	155459898	-	ENST00000368346.7	27	4	0	0	0	0	0	0.256886	0	0	0	0	0	0	0	0	0	0	0	0	0	0	0	0.187335	0	0	0	0	0	0	0.352232	0	0	0	0	0	0	0	0	0	0	0
chr1_155338089_155439068_-	ENSG00000116539.12	ASH1L	chr1	155338089	155439068	-	ENST00000368346.7	27	5	0	0	0	0	0	0	0	0	0	0	0	0	0	0	0	0	0	0	0	0	0	0	0	0	0	0	0	0	0	0	0	0	0	0	0	0	0	0	0	0
chr1_155338089_155415923_-	ENSG00000116539.12	ASH1L	chr1	155338089	155415923	-	ENST00000368346.7	27	6	0	0	0	0	0.401187	0	0	0	0	0	0.251606	0	0	0	0	0	0.273746	0.620888	0	0	0	0	0	0	0	0	0	0	0	0	0	0	0	0.377018	0	0	0	0	0	0
chr1_155338089_155395553_-	ENSG00000116539.12	ASH1L	chr1	155338089	155395553	-	ENST00000368346.7	27	7	0	0	0	0	0	0	0	0	0	0	0	0	0	0	0	0	0	0	0	0	0	0	0	0	0	0	0	0	0	0	0	0	0	0	0	0	0	0	0	0
chr1_155338089_155370983_-	ENSG00000116539.12	ASH1L	chr1	155338089	155370983	-	ENST00000368346.7	27	11	0	0	0	0	0	0	0	0	0	0	0	0	0	0	0	0	0	0	0.228832	0	0	0	0	0	0	0	0	0	0	0	0	0	0	0	0	0	0	0	0	0
chr1_155338089_155360409_-	ENSG00000116539.12	ASH1L	chr1	155338089	155360409	-	ENST00000368346.7	27	13	0	0	0	0	0	0	0	0	0	0	0	0	0	0	0	0	0	0	0	0	0	0	0	0	0	0	0.298068	0	0	0	0	0	0	0	0	0	0	0	0	0
chr1_155338089_155357749_-	ENSG00000116539.12	ASH1L	chr1	155338089	155357749	-	ENST00000368346.7	27	14	0	0	0	0	0	0	0	0	0	0	0	0	0	0	0	0	0	0	0	0	0	0.246697	0	0	0	0	0	0	0	0	0	0	0.682569	0	0	0	0	0.183442	0	0
chr1_155338089_155354630_-	ENSG00000116539.12	ASH1L	chr1	155338089	155354630	-	ENST00000368346.7	27	16	0	0	0	0	0	0	0	0	0	0	0	0	0	0	0	0	0	0	0	0	0	0	0	0	0	0	0	0	0	0	0.279556	0	0	0	0	0	0	0	0	0
chr1_155338089_155349596_-	ENSG00000116539.12	ASH1L	chr1	155338089	155349596	-	ENST00000368346.7	27	18	0	0	0	0	0	0	0	0	0	0	0	0	0	0	0	0	0	0	0	0	0	0	0	0	0	0	0	0	0	0	0	0	0	0	0	0	0	0	0	0
chr1_155338089_155347904_-	ENSG00000116539.12	ASH1L	chr1	155338089	155347904	-	ENST00000368346.7	27	20	0	0	0	0	0	0	0	0	0	0	0	0	0	0	0	0	0	0	0	0	0	0	0	0	0	0	0	0	0	0	0	0	0	0	0	0	0.585486	0	0	0
chr1_155338089_155344273_-	ENSG00000116539.12	ASH1L	chr1	155338089	155344273	-	ENST00000368346.7	27	22	0.241694	0	0	0	0	0	0.216125	0	0	0	0.251606	0	0	0	0	0	0	0	0	0	0	0	0	0	0	0	0	0	0	0	0	0	0	0	0.27011	0.227166	0	0	0	0
chr1_155338089_155342102_-	ENSG00000116539.12	ASH1L	chr1	155338089	155342102	-	ENST00000368346.7	27	25	0	0	0	0	0	0	0	0	0	0	0	0	0	0	0	0	0	0	0	0	0	0	0	0	0	0	0	0	0	0	0	0	0	0	0	0	0	0	0	0
chr1_155338089_155339368_-	ENSG00000116539.12	ASH1L	chr1	155338089	155339368	-	ENST00000368346.7	27	26	0	0	0	0	0	0	0	0	0	0	0	0	0	0	0	0	0	0	0	0	0	0	0	0	0	0	0	0.176584	0	0	0	0	0	0	0	0	0.267418	0	0.344189	0
chr1_155338089_155338390_-	ENSG00000116539.12	ASH1L	chr1	155338089	155338390	-	ENST00000368346.7	27	27	0	0	0	0	0	0	0	0	0	0	0	0	0	0	0	0	0	0	0	0	0	0	0	0	0	0	0	0	0	0	0.279556	0	0	0	0	0	0	0	0	0
chr1_155378281_155380116_-	ENSG00000116539.12	ASH1L	chr1	155378281	155380116	-	ENST00000392403.7	10	8	0.512483	0.306634	0	0.604644	0	0.731394	0.320729	1.38256	0.53411	0	0.251606	0.920574	0	0	0.633398	0.664375	0	0	0	0	0.786132	0.187335	0.276394	0.584256	0	0.432484	1.18815	0.3276	0	0.500492	0	0	0.539305	0.602365	0.478793	0.216034	0	0.351782	1.03257	0.364473
chr1_155370504_155380116_-	ENSG00000116539.12	ASH1L	chr1	155370504	155380116	-	ENST00000392403.7	12	8	0	0	0.406021	0	0.623215	1.21219	0	0	0	0	0	0	0	0	0	0	0	0	0	0	0	0	0	0	0	0	0	0	0	0	0	0	0	0	0	0	0	0	0	0.364473
chr1_155352706_155380116_-	ENSG00000116539.12	ASH1L	chr1	155352706	155380116	-	ENST00000392403.7	17	8	0	0.343846	0	0	0	0	0.320729	0	0	0	0	0	0	0	0	0	0	0	0	0	0	0	0	0	0	0	0	0	0	0	0	0	0	0	0	0	0	0	0	0
chr1_155338089_155380116_-	ENSG00000116539.12	ASH1L	chr1	155338089	155380116	-	ENST00000392403.7	27	8	0	0	0	0	0.401187	0	0	0	0	0	0	0	0	0	0	0	0	0	0	0	0	0	0	0	0	0	0	0	0	0	0	0	0	0	0	0	0	0	0	0
chr1_155521100_155562295_-	ENSG00000116539.12	ASH1L	chr1	155521100	155562295	-	ENST00000548830.1	3	2	0	0	0	0	0	0	0	0	0	0	0	0	0	0	0	0	0	0	0	0	0	0	0	0	0	0	0	0	0	0	0	0	0	0	0	0	0	0	0	0
chr1_197142331_197144100_-	ENSG00000066279.17	ASPM	chr1	197142331	197144100	-	ENST00000367409.8	3	2	0	0	0	0	0	0	0	0	0	0	0	0	0	0	0	0	0	0	0	0	0	0	0	0	0	0	0	0	0	0	0	0	0	0	0	0	0	0	0	0
chr1_197139767_197144100_-	ENSG00000066279.17	ASPM	chr1	197139767	197144100	-	ENST00000367409.8	4	2	0	0	0	0	0	0	0	0	0.281873	0	0	0	0	0	0	0	0	0	0	0	0	0	0	0	0	0	0	0	0	0	0	0	0	0	0	0	0	0	0	0
chr1_197132285_197139871_-	ENSG00000066279.17	ASPM	chr1	197132285	197139871	-	ENST00000367409.8	7	4	0	0	0	0	0	0	0	0	0	0	0	0	0	0	0	0	0	0	0	0	0	0	0	0	0	0	0	0	0	0	0	0	0	0	0	0	0	0	0	0
chr1_197132285_197135242_-	ENSG00000066279.17	ASPM	chr1	197132285	197135242	-	ENST00000367409.8	7	5	0	0	0	0	0	0	0	0	0	0	0	0	0	0	0	0	0	0	0	0	0	0	0	0	0	0	0	0	0	0	0	0	0	0	0	0	0	0	0.719152	0
chr1_197129915_197139871_-	ENSG00000066279.17	ASPM	chr1	197129915	197139871	-	ENST00000367409.8	8	4	0	0	0	0	0	0	0	0	0	0	0	0	0	0	0	0	0	0	0	0	0	0	0	0	0	0	0	0	0	0	0	0	0	0	0	0.227166	0	0	0	0
chr1_197129915_197135242_-	ENSG00000066279.17	ASPM	chr1	197129915	197135242	-	ENST00000367409.8	8	5	0	0	0	0	0	0	0	0	0	0	0	0	0	0	0	0	0	0	0	0	0	0	0	0	0	0	0	0	0	0	0	0	0	0	0	0	0	0.183442	0	0
chr1_197129187_197135242_-	ENSG00000066279.17	ASPM	chr1	197129187	197135242	-	ENST00000367409.8	9	5	0	0	0	0	0	0	0	0	0.53411	0	0	0	0	0	0	0.302829	0	0	0	0	0	0	0	0	0	0	0	0	0	0	0	0	0	0	0	0	0.267418	0	0	0
chr1_197128490_197135242_-	ENSG00000066279.17	ASPM	chr1	197128490	197135242	-	ENST00000367409.8	10	5	0	0	0	0	0	0	0	0	0	0	0	0	0	0	0	0	0	0	0	0.252769	0	0	0	0	0	0	0	0	0	0	0	0	0.269653	0	0	0.227166	0	0	0	0
chr1_197128490_197133595_-	ENSG00000066279.17	ASPM	chr1	197128490	197133595	-	ENST00000367409.8	10	6	0	0	0	0	0	0	0	0	0	0	0	0	0	0	0	0	0	0	0	0	0	0.170444	0	0	0	0	0	0	0	0	0	0	0	0	0	0	0	0	0	0
chr1_197124110_197135242_-	ENSG00000066279.17	ASPM	chr1	197124110	197135242	-	ENST00000367409.8	13	5	0	0	0	0.604644	0	0	0	0.553919	0	0	0	0	0	0	0	0	0	0	0	0	0	0	0	0	0	0	0	0	0.704464	0	0	0	0	0	0	0	0	0	0	0
chr1_197124110_197133595_-	ENSG00000066279.17	ASPM	chr1	197124110	197133595	-	ENST00000367409.8	13	6	0	0	0	0	0	0	0	0	0	0	0	0	0	0	0	0	0	0	0	0	0	0	0	0	0	0	0	0	0.561837	0	0	0	0	0	0	0	0	0	0	0
chr1_197124110_197128665_-	ENSG00000066279.17	ASPM	chr1	197124110	197128665	-	ENST00000367409.8	13	10	0	0	0	0	0	0	0	0	0	0	0	0	0	0	0	0	0	0	0	0	0	0	0	0	0	0	0	0	0	0	0	0	0	0	0	0	0	0	0	0
chr1_197124110_197125191_-	ENSG00000066279.17	ASPM	chr1	197124110	197125191	-	ENST00000367409.8	13	11	0	0	0	0	0	0	0	0	0	0	0	0	0	0	0	0	0	0	0	0	0	0	0	0	0	0	0	0	0	0	0	0	0	0	0	0	0	0.16834	0	0
chr1_197122388_197122595_-	ENSG00000066279.17	ASPM	chr1	197122388	197122595	-	ENST00000367409.8	14	14	0	0	0	0	0	0	0	0	0	0	0	0	0	0	0	0	0	0	0	0	0	0	0	0	0	0	0	0	0	0	0	0	0	0	0	0	0	0.16834	0	0
chr1_197122159_197125191_-	ENSG00000066279.17	ASPM	chr1	197122159	197125191	-	ENST00000367409.8	15	11	0	0	0	0	0	0	0	0	0	0	0	0	0	0	0	0	0	0	0.582524	0	0	0	0	0	0	0	0	0	0	0	0	0	0	0	0	0	0	0	0	0
chr1_197122159_197122595_-	ENSG00000066279.17	ASPM	chr1	197122159	197122595	-	ENST00000367409.8	15	14	0	0	0	0	0	0	0	0	0	0.547384	0	0	0	0	0	0	0	0	0	0	0	0	0	0	0	0	0	0	0	0	0	0	0	0	0	0	0	0	0	0
chr1_197121915_197135242_-	ENSG00000066279.17	ASPM	chr1	197121915	197135242	-	ENST00000367409.8	16	5	0	0	0	0	0	0	0.962188	0	0	0	0	0	0	0	0	0	0	0	0	0	0	0	0	0	0	0	0	0	0	0	0	0	0	0	0	0	0	0	0	0
chr1_197121915_197132352_-	ENSG00000066279.17	ASPM	chr1	197121915	197132352	-	ENST00000367409.8	16	7	0	0	0	0	0	0	0	0	0	0	0	0	0	0	0	0	0	0.292181	0	0	0	0	0	0	0	0	0	0	0	0	0	0	0	0	0	0	0	0	0	0
chr1_197121915_197125191_-	ENSG00000066279.17	ASPM	chr1	197121915	197125191	-	ENST00000367409.8	16	11	0	0	0	0	0	0	0	0	0	0	0	0	0	0	0	0	0	0	0	0	0	0	0	0.292128	0	0	0	0	0	0	0	0	0	0	0	0	0	0	0	0
chr1_197121915_197122595_-	ENSG00000066279.17	ASPM	chr1	197121915	197122595	-	ENST00000367409.8	16	14	0	0	0	0	0	0	0	0	0	0	0	0	0	0	0	0	0	0.876544	0	0	0	0	0	0	0	0	0	0	0	0	0	0	0	0	0	0	0	0	0	0
chr1_197117789_197139871_-	ENSG00000066279.17	ASPM	chr1	197117789	197139871	-	ENST00000367409.8	17	4	0	0	0	0	0.224177	0	0	0	0	0	0	0	0	0	0	0.291251	0.263939	0	0	0	0	0	0.310838	0	0	0	0.297039	0	0	0	0	0	0	0	0	0	0.267418	0	0	7.48029
chr1_197117789_197135242_-	ENSG00000066279.17	ASPM	chr1	197117789	197135242	-	ENST00000367409.8	17	5	0	0	0.326655	0	0.672531	0.256886	0	0.22942	0	0	0.400444	0	0.285577	0.374527	0.800711	0	0.70762	1.13621	0	0	0.262044	0	0	0.424084	0	0	0.595107	0.680768	0	0	0	0.298654	0	0	0	0	2.22014	0	1.7025	0
chr1_197117789_197132352_-	ENSG00000066279.17	ASPM	chr1	197117789	197132352	-	ENST00000367409.8	17	7	0	0	0	0	0	0	0	0	0	0	0	0	0	0	0	0	0	0	0	0	0	0	0	0	0	0	0	0	0	0	0	0	0	0	0	0	0	0	0.567498	0
chr1_197117789_197128665_-	ENSG00000066279.17	ASPM	chr1	197117789	197128665	-	ENST00000367409.8	17	10	0	0	0	0	0	0	0	0.553919	0	0	0.251606	0	0	0	0	0	0	1.24178	0	0	0	0	0	0	0	0	0	0	0	0	0	0	0	0	0	0	0	0	0	0
chr1_197117789_197125191_-	ENSG00000066279.17	ASPM	chr1	197117789	197125191	-	ENST00000367409.8	17	11	0.483388	0.306634	0	0	0.224177	0	0.432249	0	0.53411	1.162	0	0.722821	0	0.187263	0	0.302829	0.801624	0	0.808643	0	0	0.604476	0	0	0	0	0	0	0	1.18903	0.559112	0.252936	0	0	0.257402	1.63678	0.267418	0.16834	0	0
chr1_197117789_197124955_-	ENSG00000066279.17	ASPM	chr1	197117789	197124955	-	ENST00000367409.8	17	12	0	0	0	0	0	0.606096	0	0	0	0	0.286956	0	0	0	0	0	0	0	0.457664	0	0	0	0	0	0	0	0	0.3276	0	0	0	0	0	0	0	0	0	0	0	0
chr1_197117789_197122595_-	ENSG00000066279.17	ASPM	chr1	197117789	197122595	-	ENST00000367409.8	17	14	0.263777	0	0	0	0	0	0	0	0	0	0	0	0.620102	0	0	0	0	0	0	0	0	0.170444	0	0	0	0	0	0	0	0	0	0	0	0	0	0.227166	0	0	0.344189	0.506118
chr1_197117789_197122043_-	ENSG00000066279.17	ASPM	chr1	197117789	197122043	-	ENST00000367409.8	17	16	0	0	0	0	0	0	0	0	0	0	0	0	0	0	0	0	0	0	0	0	0	0	0	0	0	0	0	0	0	0	0	0	0	0	0	0	0	0	0	0
chr1_197117789_197117983_-	ENSG00000066279.17	ASPM	chr1	197117789	197117983	-	ENST00000367409.8	17	17	0	0	0	0	0	0	0	0	0	0	0	0	0	0	0	0	0	0	0	0	0.469438	0.187335	0	0	0	0	0	0	0	0	0	0	0	0	0	0	0	0	0	0
chr1_197100431_197117983_-	ENSG00000066279.17	ASPM	chr1	197100431	197117983	-	ENST00000367409.8	18	17	0	0	0	0	0	0	0	0	0	0	0	0	0	0	0	0	0	0	0	0	0	0	0	0	0	0	0	0	0	0	0	0	0	0	0	0	0	0	0	0
chr1_197100431_197105185_-	ENSG00000066279.17	ASPM	chr1	197100431	197105185	-	ENST00000367409.8	18	18	0	0	0	0	0	0	0	0	0	0	0	0	0	0	0	0	0	0	0	0	0	0	0	0	0	0	0	0	0	0	0	0.252936	0	0	0	0	0	0	0	0
chr1_197094084_197125191_-	ENSG00000066279.17	ASPM	chr1	197094084	197125191	-	ENST00000367409.8	20	11	0	0	0	0	0	0	0	0	0	0	0	0	0	0	0	0	0	0	0	0	0	0	0	0	0	0	0	0	0	0	0	0	0	0	0	0	0	0	0	0
chr1_197094084_197096164_-	ENSG00000066279.17	ASPM	chr1	197094084	197096164	-	ENST00000367409.8	20	19	0.512483	0	0	0	0	0	0	0	0	0	0	0	0	0	0	0	0	0	0	0	0	0	0	0	0	0	0	0	0	0	0	0	0	0	0	0	0	0	0	0
chr1_197093052_197125191_-	ENSG00000066279.17	ASPM	chr1	197093052	197125191	-	ENST00000367409.8	21	11	0	0	0	0	0	0	0	0	0	0	0.286956	0	0	0	0	0	0	0	0	0	0	0	0	0	0	0	0	0	0	0	0	0	0	0	0	0	0	0	0	0
chr1_197093052_197096164_-	ENSG00000066279.17	ASPM	chr1	197093052	197096164	-	ENST00000367409.8	21	19	0	0	0	0	0	0.217621	0	0	0	0	0	0	0	0	0	0	0	0	0	0	0	0	0	0	0	0	0	0	0	0.250246	0	0	0	0	0	0	0	0	0	0
chr1_197091907_197125191_-	ENSG00000066279.17	ASPM	chr1	197091907	197125191	-	ENST00000367409.8	22	11	0	0	0	0	0	0	0	0	0	0	0	0	0	0	0	0	0	0	0	0	0	0	0.331496	0	0	0	0	0	0	0	0	0	0	0	0	0	0	0	0	0
chr1_197091907_197096164_-	ENSG00000066279.17	ASPM	chr1	197091907	197096164	-	ENST00000367409.8	22	19	0	0	0	0	0	0	0	0	0	0	0	0	0	0	0	0	0	0	0	0	0	0	0	0	0	0	0.298068	0	0	0	0	0	0	0	0	0	0	0	0	0
chr1_197091907_197093261_-	ENSG00000066279.17	ASPM	chr1	197091907	197093261	-	ENST00000367409.8	22	21	0	0	0	0	0	0.217621	0	0	0	0	0	0	0	0	0	0	0	0	0	0	0	0	0	0	0	0	0	0	0	0	0	0	0	0	0	0	0	0	0	0
chr1_197090850_197105185_-	ENSG00000066279.17	ASPM	chr1	197090850	197105185	-	ENST00000367409.8	23	18	0	0	0	0	0	0	0	0	0	0	0	0	0	0	0	0	0	0	0	0	0	0	0	0	0	0	0	0	0	0	0	0	0	0	0	0	0.292743	0	0	0
chr1_197090850_197096164_-	ENSG00000066279.17	ASPM	chr1	197090850	197096164	-	ENST00000367409.8	23	19	0	0	0	0	0	0	0	0	0	0	0	0	0	0	1.11825	0	0	0	0	0	0	0	0	0	0	0	0	0	0	0	0	0	0	0	0	0	0	0	0	0
chr1_197090850_197092056_-	ENSG00000066279.17	ASPM	chr1	197090850	197092056	-	ENST00000367409.8	23	22	0	0	0	0	0	0	0	0	0	0	0	0	0	0	0	0.302829	0	0	0	0	0	0	0	0	0	0	0	0	0.352232	0	0	0	0	0	0	0	0	0	0	0
chr1_197090196_197096164_-	ENSG00000066279.17	ASPM	chr1	197090196	197096164	-	ENST00000367409.8	24	19	0	0	0	0	0	0	0	0	0	0	0	0	0	0	0	0	0	0	0	0	0	0	0	0	0	0	0	0	0.297656	0	0	0	0	0	0	0	0	0	0	0
chr1_197089930_197128665_-	ENSG00000066279.17	ASPM	chr1	197089930	197128665	-	ENST00000367409.8	25	10	0	0	0	0	0	0	0	0	0	0	0	0	0	0	0	0	0	0	0	0	0	0	0	0	0	0	0	0	0	0.229511	0	0	0	0	0	0	0	0	0	0
chr1_197089930_197125191_-	ENSG00000066279.17	ASPM	chr1	197089930	197125191	-	ENST00000367409.8	25	11	0	0	0	0	0	0	0	0	0	0	0	0	0	0	0	0	0	0	0	0	0	0	0	0	0	0	0	0	0	0	0	0.429836	0	0	0	0	0	0	0	0
chr1_197089930_197096164_-	ENSG00000066279.17	ASPM	chr1	197089930	197096164	-	ENST00000367409.8	25	19	0	0.343846	0	0	0	0	0	0	0	1.162	1.60178	0	0	0	0	0	0	0	0.291262	0	0	0	0	0	0	0	0	0	0	0	0	0	0	0	0	0	0	0	0	0
chr1_197088256_197135242_-	ENSG00000066279.17	ASPM	chr1	197088256	197135242	-	ENST00000367409.8	26	5	0	0	0	0	0	0	0	0	0	0	0	0	0	0.168313	0	0	0	0	0	0	0	0	0	0	0	0.468839	0	0	0	0	0	0	0	0	0	0	0	0	0	0
chr1_197088256_197128665_-	ENSG00000066279.17	ASPM	chr1	197088256	197128665	-	ENST00000367409.8	26	10	0	0	0	0	0	0	0	0	0	0	0	0	0	0	0	0	0	0	0	0	0	0	0.621676	0	0	0	0	0	0	0	0	0	0	0	0	0	0	0	0	0
chr1_197088256_197125191_-	ENSG00000066279.17	ASPM	chr1	197088256	197125191	-	ENST00000367409.8	26	11	0	0	0.326655	0	0	0	0	0	0	0	0	0.438693	0	0	0	0	0	0.422015	0	0	0	0	0	0	0	0	0	0	0	0	0	0	0	0	0	0	0	0	0	0
chr1_197088256_197096164_-	ENSG00000066279.17	ASPM	chr1	197088256	197096164	-	ENST00000367409.8	26	19	0.747165	0.343846	0	0	0	0.770659	0	0	0	0	0	0.637895	0	0	0	0.302829	0	0	0	0	0	0	0	0	0	0.468839	0.297039	0	0	0	0.279556	0	0	0	0	0	0	0.366884	0	0.364473
chr1_197088256_197091041_-	ENSG00000066279.17	ASPM	chr1	197088256	197091041	-	ENST00000367409.8	26	23	0	0	0	0	0	0	0	0	0	0	0	0	0	0	0	0	0	0	0	0	0	0	0	0	0	0	0	0	0	0	0	0	0	0	0	0	0	0	0	0
chr1_197086803_197124955_-	ENSG00000066279.17	ASPM	chr1	197086803	197124955	-	ENST00000367409.8	27	12	0	0	0	0	0	0	0	0	0	0	0.286956	0	0	0	0	0	0	0	0	0	0	0	0	0	0.583509	0	0	0	0	0	0	0	0	0	0	0	0	0	0	0
chr1_197086803_197096164_-	ENSG00000066279.17	ASPM	chr1	197086803	197096164	-	ENST00000367409.8	27	19	0.241694	0	0	0	0	0.388474	0	0	0	0	0	0	0	0	0	0	0	0.422015	0	0	0	0	0	0	0	0	0	0	0	0.459022	0	0	0	0	0	0	0	0	0	0
chr1_176957678_176958482_-	ENSG00000152092.15	ASTN1	chr1	176957678	176958482	-	ENST00000367657.7	11	10	0	0	0	0	0	0	0	0	0	0	0	0	0	0	0	0	0	0	0	0	0	0.170444	0	0	0	0	0	0	0	0	0	0	0	0	0	0	0	0	0	0
chr1_176936266_176958482_-	ENSG00000152092.15	ASTN1	chr1	176936266	176958482	-	ENST00000367657.7	15	10	0	0	0	0	0	0	0	0	0	0	0	0	0	0	0	0	0	0	0	0	0	0.187335	0	0	0	0	0	0	0	0	0	0	0	0	0	0	0	0	0	0
chr1_1516012_1520617_+	ENSG00000197785.13	ATAD3A	chr1	1516012	1520617	+	ENST00000378756.7	2	7	0	0	0	0	0	0	0	0	0	0	0	0	0	0	0	0	0	0	0	0	0	0	0	0	0	0	0	0	0	0	0	0	0	0	0	0	0	0	0	0
chr1_1517311_1524397_+	ENSG00000197785.13	ATAD3A	chr1	1517311	1524397	+	ENST00000378756.7	3	11	0	0	0	0	0	0	0	0	0	0	0.251606	0	0	0	0	0	0	0	0	0	0	0	0	0	0	0	0	0	0	0	0	0	0	0	0	0	0	0	0	0
chr1_1517311_1529331_+	ENSG00000197785.13	ATAD3A	chr1	1517311	1529331	+	ENST00000378756.7	3	15	0	0	0	0	0	0	0	0	0	0	0	0	0	0	0	0	0	0	0	0	0	0	0	0	0	0	0	0	0	0	0	0	0	0	0	0	0	0	0	0
chr1_1520141_1524397_+	ENSG00000197785.13	ATAD3A	chr1	1520141	1524397	+	ENST00000378756.7	6	11	0	0	0	0	0	0	0	0	0	0	0	0	0	0	0	0	0	0	0	0	0	0	0	0	0	0	0	0	0	0	0	0	0	0	0	0	0	0	0	0
chr1_1523511_1524397_+	ENSG00000197785.13	ATAD3A	chr1	1523511	1524397	+	ENST00000378756.7	9	11	0	0	0	0	0	0	0	0	0	0	0	0	0	0	0	0	0	0	0	0	0	0	0	0	0	0	0	0	0	0	0	0	0	0	0	0	0	0	0	0
chr1_1527695_1527862_+	ENSG00000197785.13	ATAD3A	chr1	1527695	1527862	+	ENST00000378756.7	14	14	0	0	0	0	0	0	0	0	0	0	0	0	0	0	0	0	0	0	0	0	0.262044	0	0	0	0	0	0	0	0	0	0	0	0	0	0	0	0	0	0	0
chr1_1527695_1529331_+	ENSG00000197785.13	ATAD3A	chr1	1527695	1529331	+	ENST00000378756.7	14	15	0	0	0	0	0	0	0	0	0	0	0	0	0	0	0	0	0	0	0	0	0	0.246697	0	0	0	0	0	0	0	0	0	0	0	0	0	0	0	0	0	0
chr1_1477274_1480936_+	ENSG00000160072.19	ATAD3B	chr1	1477274	1480936	+	ENST00000308647.7	2	5	0	0	0	0	0	0	0	0	0	0	0	0	0	0	0	0	0	0	0	0	0	0	0	0	0	0	0	0	0	0	0	0	0	0	0	0	0	0	0	0.364473
chr1_1477274_1482614_+	ENSG00000160072.19	ATAD3B	chr1	1477274	1482614	+	ENST00000308647.7	2	7	0	0	0	0	0	0	0	0	0	0	0	0	0	0	0	0	0	0	0	0	0	0	0	0	0	0	0	0	0	0	0	0	0	0.523879	0	0	0	0	0	0
chr1_1477274_1490671_+	ENSG00000160072.19	ATAD3B	chr1	1477274	1490671	+	ENST00000308647.7	2	15	0	0	0	0	0	0.435243	0	0	0	0	0	0	0	0	0.316699	0	0	0	0	0	0	0	0	0	0	0	0	0	0	0	0	0	0	0	0	0	0	0	0	0
chr1_1478644_1482614_+	ENSG00000160072.19	ATAD3B	chr1	1478644	1482614	+	ENST00000308647.7	3	7	0	0	0	0	0	0	0	0	0	0	0	0.24094	0	0	0	0	0.263939	0	0	0	0	0.170444	0	0	0	0	0	0	0.561837	0	0	0	0	0.565528	0	0	0	0.183442	0	0
chr1_1478644_1486668_+	ENSG00000160072.19	ATAD3B	chr1	1478644	1486668	+	ENST00000308647.7	3	11	0	0	0	0	0	0	0	0	0	0	0	0	0	0	0	0	0	0	0	0	0	0	0	0	0	0	0	0	0	0	0	0	0	0.188509	0	0	0	0	0	0
chr1_1479049_1482614_+	ENSG00000160072.19	ATAD3B	chr1	1479049	1482614	+	ENST00000308647.7	4	7	0	0	0	0	0	0	0	0	0	0	0	0	0	0	0	0	0	0	0	0	0	0	0	0	0	0	0	0	0	0	0	0	0	0	0	0	0	0	0.359576	0
chr1_1479049_1487914_+	ENSG00000160072.19	ATAD3B	chr1	1479049	1487914	+	ENST00000308647.7	4	12	0	0	0	0	0	0	0	0	0	0	0	0	0	0	0	0	0	0	0	0	0	0	0	0	0	0	0	0	0	0	0	0	0	0	0	0	0	0	0	0
chr1_1482138_1486668_+	ENSG00000160072.19	ATAD3B	chr1	1482138	1486668	+	ENST00000308647.7	6	11	0	0	0	0	0	0	0	0	0	0	0	0	0	0	0	0	0	0	0	0.228857	0	0.246697	0	0	0	0	0	0	0	0	0	0	0	0	0	0	0.267418	0	0	0
chr1_1482545_1485171_+	ENSG00000160072.19	ATAD3B	chr1	1482545	1485171	+	ENST00000308647.7	7	8	0	0	0	0	0	0	0	0	0	0	0	0	0	0	0	0	0	0	0	0	0	0	0	0	0	0	0	0	0	0	0	0.429836	0	0	0	0	0	0	0	0
chr1_1485016_1486668_+	ENSG00000160072.19	ATAD3B	chr1	1485016	1486668	+	ENST00000308647.7	8	11	0	0	0	0	0	0	0	0	0	0	0	0	0	0	0	0	0	0	0	0	0	0	0	0	0	0	0	0	0	0	0	0	0	0	0	0	0	0	0	0
chr1_1485016_1487914_+	ENSG00000160072.19	ATAD3B	chr1	1485016	1487914	+	ENST00000308647.7	8	12	0	0	0	0	0	0	0	0	0	0	0	0	0	0	0	0	0	0	0	0	0	0	0	0	0	0	0	0.26688	0	0	0	0	0	0	0	0	0	0	0	0
chr1_1487863_1490424_+	ENSG00000160072.19	ATAD3B	chr1	1487863	1490424	+	ENST00000308647.7	12	14	0	0	0	0	0	0	0	0	0	0	0	0	0	0	0	0	0	0	0	0	0	0	0	0	0	0	0	0	0	0	0	0	0	0	0	0	0	0	0	0
chr1_1489204_1490671_+	ENSG00000160072.19	ATAD3B	chr1	1489204	1490671	+	ENST00000308647.7	13	15	0.241694	0	0	0	0	0	0	0	0	0	0.400444	0.318948	0	0.336626	0	0	0	0	0.228832	0.457715	0	0.434032	0	0.292128	0	0	0	0	0.595312	0.250246	0.279556	0.298654	0	0	0.514804	0.355187	0.447303	0.16834	1.06334	0
chr1_1490257_1490671_+	ENSG00000160072.19	ATAD3B	chr1	1490257	1490671	+	ENST00000308647.7	14	15	0	0	0	0	0	0	0	0	0	0	0	0	0	0.186709	0	0	0	0	0	0	0	0	0	0	0	0	0	0	0	0	0	0	0	0	0	0	0	0	0	0
chr1_1452046_1454500_+	ENSG00000215915.9	ATAD3C	chr1	1452046	1454500	+	ENST00000378785.6	2	4	0	0	0	0	0	0	0	0	0	0	0	0	0	0	0	0	0	0	0	0	0	0	0	0	0	0	0	0	0	0	0	0	0.269653	0	0	0	0	0	0	0
chr1_1459161_1462708_+	ENSG00000215915.9	ATAD3C	chr1	1459161	1462708	+	ENST00000378785.6	9	11	0	0	0	0	0	0	0	0	0	0	0	0	0	0	0	0	0	0	0	0	0	0	0	0	0	0	0	0	0	0	0	0.252936	0	0	0	0	0	0	0	0
chr1_212615018_212618234_+	ENSG00000162772.16	ATF3	chr1	212615018	212618234	+	ENST00000613954.4	2	4	0	0	0	0	0.311608	0	0	0	0	0	0	0	0	0	0	0	0	0	0	0	0	0	0	0	0	0	0	0	0	0	0	0	0	0	0	0	0	0	0	0
chr1_161778244_161784096_+	ENSG00000118217.5	ATF6	chr1	161778244	161784096	+	ENST00000367942.3	2	4	0.512483	1.22077	0.732677	0	0.623215	0	0	0.68826	1.18945	0	0	0	0.345927	0.336626	0	0	0	0	0.291262	0	0.741326	0.621366	0.552789	1.67448	0.692705	0.322986	0	0.176584	1.15715	0.250246	0	0.298654	0	1.13106	0	0.710375	0	0	0	1.23506
chr1_161778244_161792327_+	ENSG00000118217.5	ATF6	chr1	161778244	161792327	+	ENST00000367942.3	2	6	0	0	0	0	0	0	0	0	0	0	0	0	0	0	0	0	0	0.620888	0	0.505539	0.234719	0	0	0	0	0	0	0	0	0	0	0	0	0	0	0	0	0	0	0
chr1_161778244_161802272_+	ENSG00000118217.5	ATF6	chr1	161778244	161802272	+	ENST00000367942.3	2	7	0.263777	0.343846	0	0	1.12088	0.256886	1.73007	0.828636	0	0	0	0	0	0	0	0	0	0.584363	0.22612	0	0.786132	0.170444	0	0	0	0	0	0.176584	0	0	0.279556	0	0.451851	0	0	0	0	0.8417	1.135	0
chr1_161778244_161821161_+	ENSG00000118217.5	ATF6	chr1	161778244	161821161	+	ENST00000367942.3	2	9	0	0	0	0	0	0	0	0	0	0	0	0	0	0	0	0	0	0	0.22612	0	0	0	0	0	0	0	0.298068	0	0	0	0	0	0	0	0	0	0	0	0	0
chr1_161778244_161853323_+	ENSG00000118217.5	ATF6	chr1	161778244	161853323	+	ENST00000367942.3	2	12	0	0	0	0	0	0	0	0	0	0	0	0	0	0	0	0	0	0	0	0	0	0	0	0	0	0	0	0.3276	0	0	0	0	0	0	0	0	0	0	0	0
chr1_161778244_161863312_+	ENSG00000118217.5	ATF6	chr1	161778244	161863312	+	ENST00000367942.3	2	14	0	0	0	0	0	0	0	0	0	0	0	0	0	0.168313	0	0	0	0.292181	0.22612	0	0	0	0	0	0	0	0	0	0	0	0	0	0	0	0	0	0	0	0	0
chr1_161778244_161912380_+	ENSG00000118217.5	ATF6	chr1	161778244	161912380	+	ENST00000367942.3	2	15	0	0	0	0	0	0	0	0	0	0	0	0	0	0	0.559125	0	0	0	0	0	0	0	0	0	0	0	0	0	0	0	0	0	0	0	0	0	0	0	0	0
chr1_161781912_161802272_+	ENSG00000118217.5	ATF6	chr1	161781912	161802272	+	ENST00000367942.3	3	7	0	0	0	0	0	0	0	0	0	0	0	0	0	0	0	0	0	0	0	0	0	0	0	0	0	0	0	0	0	0	0	0	0	0	0	0	0.740046	0	0	0
chr1_161781912_161819818_+	ENSG00000118217.5	ATF6	chr1	161781912	161819818	+	ENST00000367942.3	3	8	0	0	0	0	0	0	0	0	0	0	0	0	0	0	0	0	0	0	0	0	0	0	0	0	0	0	0	0	0	0.280616	0	0	0	0	0	0	0	0	0	0
chr1_161781912_161853323_+	ENSG00000118217.5	ATF6	chr1	161781912	161853323	+	ENST00000367942.3	3	12	0	0	0	0	0	0	0	0	0	0	0	0	0	0	0	0	0	0	0	0	0	0	0	0.292128	0	0	0	0	0	0	0	0	0	0	0	0	0	0	0	0
chr1_161781912_161863312_+	ENSG00000118217.5	ATF6	chr1	161781912	161863312	+	ENST00000367942.3	3	14	0	0	0	0	0	0	0	0	0	0	0	0	0	0	0.316699	0	0	0	0	0	0	0	0	0	0	0	0	0	0	0	0	0	0	0	0	0	0	0	0	0
chr1_161791408_161792327_+	ENSG00000118217.5	ATF6	chr1	161791408	161792327	+	ENST00000367942.3	5	6	0	0	0	0	0	0	0	0	0	0	0	0	0.345927	0.355022	0	0	0	0	0	0	0	0	0	0	0	0	0	0	0	0	0	0	0	0	0	0	0	0	0	0
chr1_161791408_161802272_+	ENSG00000118217.5	ATF6	chr1	161791408	161802272	+	ENST00000367942.3	5	7	0	0	0	0	0	0	0	0	0	0	0	0	0	0	0	0	0	0	0	0	0	0	0	0	0	0	0	0.176584	0	0	0	0	0	0	0	0	0	0	0	0
chr1_161791408_161821161_+	ENSG00000118217.5	ATF6	chr1	161791408	161821161	+	ENST00000367942.3	5	9	0	0	0	0	0	0	0	0	0	0	0	0	0	0	0	0	0	0	0	0	0	0	0	0	0	0	0.298068	0	0	0	0	0	0	0	0	0	0	0	0	0
chr1_161791408_161846580_+	ENSG00000118217.5	ATF6	chr1	161791408	161846580	+	ENST00000367942.3	5	10	0	0	0	0	0	0	0	0	0	0	0	0	0	0	0	0	0	0	0	0	0	0	0	0	0	0	0	0	0	0	0	0	0	0	0	0	0	0	0	0
chr1_161791408_161863312_+	ENSG00000118217.5	ATF6	chr1	161791408	161863312	+	ENST00000367942.3	5	14	0	0	0	0	0	0	0	0	0	0	0	0	0	0	0	0	0	0	0	0	0	0	0	0	0	0	0	0	0	0	0	0	0	0	0	0	0	0	0	0
chr1_161791408_161912380_+	ENSG00000118217.5	ATF6	chr1	161791408	161912380	+	ENST00000367942.3	5	15	0	0	0	0	0	0	0	0	0	0	0	0.318948	0	0.168313	0	0	0	0	0	0	0	0	0	0	0	0	0	0	0	0	0	0	0	0	0	0	0	0	0	0
chr1_161792124_161802272_+	ENSG00000118217.5	ATF6	chr1	161792124	161802272	+	ENST00000367942.3	6	7	0	0	0	0	0	0	0	0	0	0	0	0	0	0	0	0	0	0	0	0	0	0	0	0	0	0	0	0	0.297656	0	0	0	0	0	0	0	0	0	0	0
chr1_161792124_161863312_+	ENSG00000118217.5	ATF6	chr1	161792124	161863312	+	ENST00000367942.3	6	14	0	0	0	0	0	0	0	0	0	0	0	0	0	0	0	0	0	0	0	0	0	0	0	0.292128	0	0	0	0	0	0	0	0	0	0	0	0	0	0.16834	0	0
chr1_161792124_161912380_+	ENSG00000118217.5	ATF6	chr1	161792124	161912380	+	ENST00000367942.3	6	15	0	0	0	0	0	0	0	0	0	0	0	0	0	0	0	0	0	0	0	0	0	0	0	0	0	0	0	0	0	0	0	0	0	0	0.27011	0	0	0	0	0
chr1_161802052_161819818_+	ENSG00000118217.5	ATF6	chr1	161802052	161819818	+	ENST00000367942.3	7	8	0	0	0	0	0	0	0	0	0	0	0	0	0	0	0	0	0	0	0	0	0	0	0	0	0	0	0	0	0	0	0	0	0	0	0	0	0	0	0	0.364473
chr1_161802052_161821161_+	ENSG00000118217.5	ATF6	chr1	161802052	161821161	+	ENST00000367942.3	7	9	0.483388	0	0	0	0.448354	0	0	0	0	0.629299	1.04177	0.318948	0	0	0.483172	0.302829	0	0	0.452239	0	0	0	0	0.399049	0	0	0.496832	0.443465	0	0	0	1.11261	0.539305	0	0	0	0	0	0.927074	0.364473
chr1_161802052_161863312_+	ENSG00000118217.5	ATF6	chr1	161802052	161863312	+	ENST00000367942.3	7	14	0	0	0	0	0	0.217621	0	0	0	0	0	0	0	0	0	0	0	0.422015	0.291262	0	0	0	0	0	1.75053	0	0	0	0.297656	0	0	0	0	0	0	0	0	0.50502	0	0
chr1_161802052_161912380_+	ENSG00000118217.5	ATF6	chr1	161802052	161912380	+	ENST00000367942.3	7	15	0	0	0	0	0	0	0	0	0	0	0	0	0	0.168313	0	0	0	0	0	0	0	0	0	0	0	0	0	0	0.297656	0	0	0	0	0	0	0	0	0	0	0
chr1_161819633_161821161_+	ENSG00000118217.5	ATF6	chr1	161819633	161821161	+	ENST00000367942.3	8	9	0	0	0	0	0	0.217621	0	0	0	0	0	0.877386	0	0	0.316699	0	0	0	0	0	0	0.170444	0	0	0	0	0	0	0	0	0	0	0.539305	0.188509	0.27011	0	0.534836	0	0.344189	0
chr1_161819633_161846580_+	ENSG00000118217.5	ATF6	chr1	161819633	161846580	+	ENST00000367942.3	8	10	0	0	0	0	0	0	0	0	0	0	0	0	0	0	0	0	0	0	0	0	0	0	0	0	0	0	0	0	0	0	0	0	0	0	0	0	0	0	0	0
chr1_161819633_161853323_+	ENSG00000118217.5	ATF6	chr1	161819633	161853323	+	ENST00000367942.3	8	12	0	0	0	0	0	0	0	0	0	0	0	0	0	0	0	0	0	0	0	0	0	0	0	0	0	0	0	0	0	0	0	0	0	0	0	0	0	0	0	0
chr1_161819633_161863312_+	ENSG00000118217.5	ATF6	chr1	161819633	161863312	+	ENST00000367942.3	8	14	0.241694	0	0	0	0.401187	0	0	0	0	0	0	0.318948	0	0	0	0	0	0	0	0	0	0	0	0	0	0	0	0	0.352232	0	0	0	0	0.188509	0	0	0	0.366884	0	0
chr1_161821070_161853323_+	ENSG00000118217.5	ATF6	chr1	161821070	161853323	+	ENST00000367942.3	9	12	0	0	0	0	0	0	0.320729	0	0	0	0	0	0	0	0	0	0	0	0	0	0	0	0	0	0	0	0	0	0	0	0	0	0	0	0	0	0	0	0	0
chr1_161846449_161853323_+	ENSG00000118217.5	ATF6	chr1	161846449	161853323	+	ENST00000367942.3	10	12	0	0	0	0	0	0	0	0	0	0	0	0	0	0	0	0	0	0	0	0	1.26541	0	0	0	0	0	0.298068	0	0	0	0	0	0	0	0	0	0	0	0.359576	0
chr1_161846449_161863312_+	ENSG00000118217.5	ATF6	chr1	161846449	161863312	+	ENST00000367942.3	10	14	0	1.22654	0.406021	0	0.448354	0.474508	0.320729	0	0.281873	0	0.286956	0.637895	0	0.168313	0.241586	0	0	0.876544	0.452239	0	0.714001	0	1.38197	0.584256	0	0	1.78326	0.680768	0	0.750738	0	0	0.269653	0.261939	0	0.227166	0.447303	0	0	0
chr1_161846449_161912380_+	ENSG00000118217.5	ATF6	chr1	161846449	161912380	+	ENST00000367942.3	10	15	0	0	0	0	0	0.770659	0	0	0	0	0	0	0	0	0	0.59408	0	0	0	0	0	0	0	0	0	0	0	0	0	0	0	0	0	0	0	0	0	0	0	0
chr1_161851722_161853323_+	ENSG00000118217.5	ATF6	chr1	161851722	161853323	+	ENST00000367942.3	11	12	0	0	0	0	0	0	0	0	0	0	0	0	0	0	0	0	0	0	0	0	0	0	0	0	0	0	0	0	0	0	0	0	0	0	0	0	0	0	0.359576	0
chr1_161851722_161863312_+	ENSG00000118217.5	ATF6	chr1	161851722	161863312	+	ENST00000367942.3	11	14	0	0	0	0	0.224177	0	0	0	0	0	0	0	0	0	0	0	0	0	0	0	0	0	0.276394	0.292128	0	0	0	0	0	0	0	0	0	0	0	0	0.534836	0	1.28665	0
chr1_161851722_161912380_+	ENSG00000118217.5	ATF6	chr1	161851722	161912380	+	ENST00000367942.3	11	15	0	0	0.653311	0	0	0	0.320729	0	0	0	0	0	0	0	0	0	0	0	0	0.228857	0	0	0	0.292128	0	0	0	0	0.297656	0	0	0	0	0	0	0	0	0	0	0
chr1_161853224_161912380_+	ENSG00000118217.5	ATF6	chr1	161853224	161912380	+	ENST00000367942.3	12	15	0	0	0	0	0	0	0	0	0	0	0	0	0	0	0	0.291251	0	0	0	0	0	0	0	0	0	0	0	0	0	0	0	0	0	0	0	0	0	0	0	0
chr1_161860207_161912380_+	ENSG00000118217.5	ATF6	chr1	161860207	161912380	+	ENST00000367942.3	13	15	0	0	0	0	0	0	0	0	0	0	0	0	0	0	0	0	0	0	0	0	0	0	0	0	0	0	0.297039	0	0	0	0	0	0	0	0	0	0	0	0	0
chr1_62803719_62805255_+	ENSG00000125703.14	ATG4C	chr1	62803719	62805255	+	ENST00000317868.8	2	3	0	0	0	0	0.224177	0.217621	0	0	0	0	0	0.24094	0.620102	0	0	0	0	0.292181	0	0	0	0	0	0.691177	0	0	0	0	0	0	0	0	0	0	0	0	0	0	0	0
chr1_62803719_62816808_+	ENSG00000125703.14	ATG4C	chr1	62803719	62816808	+	ENST00000317868.8	2	4	0	0	0	0	0	0	0	0	0	0	0	0	0	0	0	0	0	0	0	0	0	0	0	0	0	0	0	0	0	0	0	0	0	0	0	0	0	0	0	0
chr1_62803719_62819335_+	ENSG00000125703.14	ATG4C	chr1	62803719	62819335	+	ENST00000317868.8	2	5	0	0	0	0	0	0	0	0	0	0	0	0	0	0	0	0	0	0	0	0	0	0	0	0	0	0	0	0	0	0	0	0	0	0	0	0	0	0.338014	0	0
chr1_62803719_62821209_+	ENSG00000125703.14	ATG4C	chr1	62803719	62821209	+	ENST00000317868.8	2	6	0	0.343846	0.494341	0	0.401187	0.692129	0	0.22942	0	0	0.573911	0	0.917081	0.355022	0	0.664375	0	1.55823	0.291262	0	0.976045	0	0.552789	2.23052	0	0.432484	1.39104	0.529753	1.47591	0.739639	0.890178	0.298654	1.03488	0.523879	0.257402	0.227166	1.32553	0	2.42165	0.364473
chr1_62803719_62834852_+	ENSG00000125703.14	ATG4C	chr1	62803719	62834852	+	ENST00000317868.8	2	9	0.263777	0.343846	0	0	0	0.217621	0	0.276959	0	0.629299	0	0	0	0	0	0.635017	0	0	0.457664	0	0	0	0.276394	1.00834	0	0	0.596137	0.26688	0.561837	0.250246	0	0.298654	0	0	0	0.227166	0	0	0.719152	0
chr1_62803719_62841547_+	ENSG00000125703.14	ATG4C	chr1	62803719	62841547	+	ENST00000317868.8	2	10	0.270788	0	0.326655	0.673104	0.311608	0.731394	0.216125	0	0.281873	0.629299	0.286956	0	0.631504	0.729549	0	0.302829	0.273746	0	0.748926	0.252769	0	0	0	2.44395	0	0	0.298068	0.3276	1.35435	0	0.279556	0	0	0	1.55712	0	0.292743	0.16834	0.688377	0
chr1_62816575_62816808_+	ENSG00000125703.14	ATG4C	chr1	62816575	62816808	+	ENST00000317868.8	4	4	0.263777	0	0	0	0	0	0	0	0	0	0	0	0	0	0	0	0	0	0	0	0	0	0	0	0	0	0	0	0	0	0	0	0	0	0	0	0	0	0	0
chr1_62816575_62821209_+	ENSG00000125703.14	ATG4C	chr1	62816575	62821209	+	ENST00000317868.8	4	6	0	0	0	0	0.311608	0	0	0	0	0	0	0	0	0	0	0	0	0.292181	0	0	0	0	0	0	0	0.864969	0	0	0	0	0	0	0	0	0	0.681498	0	0.16834	0	0.364473
chr1_62816575_62841547_+	ENSG00000125703.14	ATG4C	chr1	62816575	62841547	+	ENST00000317868.8	4	10	0	0	0	0	0	0	0	0	0.281873	0	0	0.481881	0	0	0	0	0.273746	0.584363	0	0	0.469438	0.493394	0.662992	0	0	0	0	0	0	0	0	0.429836	0	0.188509	0	0.216034	0	0.338014	0	0
chr1_62819005_62834116_+	ENSG00000125703.14	ATG4C	chr1	62819005	62834116	+	ENST00000317868.8	5	8	0	0	0	0	0	0	0	0	0	0	0	0	0.285577	0	0	0	0	0	0	0	0	0	0	0	0	0	0	0	0	0	0	0	0	0	0	0	0	0	0	0
chr1_62821139_62834852_+	ENSG00000125703.14	ATG4C	chr1	62821139	62834852	+	ENST00000317868.8	6	9	0	0	0	0	0	0	0	0	0	0	0	0	0	0	0	0	0	0	0	0	0	0	0	0	0	0	0	0	0	0	0	0	0	0	0	0	0.447303	0	0	0
chr1_62821139_62841547_+	ENSG00000125703.14	ATG4C	chr1	62821139	62841547	+	ENST00000317868.8	6	10	0	0	0	0	0	0	0	0	0	0	0	0.24094	0	0	0	0	0	0	0	0	0	0	0	0	0	0	0	0	0	0	0	0	0	0	0	0	0.447303	0	0	0
chr1_62829040_62841547_+	ENSG00000125703.14	ATG4C	chr1	62829040	62841547	+	ENST00000317868.8	7	10	0	0.406923	0	0.673104	0.311608	0	0	0	0	0	0	0	0	0	0	0	0	0	0.22612	0.505539	0	0	0	0.399049	0	0	0	0	0	0.250246	0	0	0	0	0	0	0	0	0.688377	0
chr1_62834038_62841547_+	ENSG00000125703.14	ATG4C	chr1	62834038	62841547	+	ENST00000317868.8	8	10	0	0	0	0	0	0	0	0	0	0	0	0	0	0	0	0	0.263939	0	0	0	0	0	0	0	0	0	0	0	0	0	0	0	0	0	0	0	0	0	0	0
chr1_62803778_62816808_+	ENSG00000125703.14	ATG4C	chr1	62803778	62816808	+	ENST00000443289.5	2	4	0	0	0	0	0	0	0	0	0	0	0	0	0	0	0	0	0	0	0	0	0	0	0	0	0	0	0	0	0	0	0	0	0	0	0	0	0	0	0	0
chr1_17005374_17005778_-	ENSG00000159363.17	ATP13A2	chr1	17005374	17005778	-	ENST00000326735.12	3	2	0	0	0	0	0	0	0	0	0	0	0	0	0	0	0	0	0	0	0	0	0	0	0	0	0	0	0	0	0	0	0	0	0	0	0	0	0	0	0	0
chr1_16995976_16997175_-	ENSG00000159363.17	ATP13A2	chr1	16995976	16997175	-	ENST00000326735.12	15	12	0	0	0	0	0	0	0	0.22942	0	0	0	0	0	0	0	0	0	0	0	0	0	0	0	0	0	0	0	0	0	0	0	0	0	0	0	0	0	0	0	0
chr1_16991734_17002373_-	ENSG00000159363.17	ATP13A2	chr1	16991734	17002373	-	ENST00000326735.12	20	7	0	0	0	0	0	0	0	0	0	0	0	0	0	0	0	0	0	0	0.228832	0	0	0	0	0	0	0	0	0	0	0	0	0	0	0	0	0	0	0	0	0
chr1_16991734_17000534_-	ENSG00000159363.17	ATP13A2	chr1	16991734	17000534	-	ENST00000326735.12	20	9	0	0	0	0	0	0	0	0	0	0	0	0	0	0	0	0	0	0	0	0	0	0	0	0	0	0	0	0	0	0	0	0	0	0	0	0	0	0	0	0
chr1_16990127_16991858_-	ENSG00000159363.17	ATP13A2	chr1	16990127	16991858	-	ENST00000326735.12	21	20	0	0	0	0	0	0	0	0	0	0	0	0	0	0	0	0	0	0	0	0	0	0.340888	0	0	0	0	0	0	0	0	0	0	0	0	0	0	0	0	0	0
chr1_16989887_16992402_-	ENSG00000159363.17	ATP13A2	chr1	16989887	16992402	-	ENST00000326735.12	22	18	0	0	0	0	0	0	0	0	0	0	0	0	0	0	0	0	0	0	0	0	0	0	0	0	0	0	0	0	0	0	0.279556	0	0	0	0	0	0	0	0	0
chr1_16987046_16987269_-	ENSG00000159363.17	ATP13A2	chr1	16987046	16987269	-	ENST00000326735.12	26	26	0.270788	0	0	0	0	0	0	0	0	0	0	0	0	0	0	0	0	0	0	0	0	0	0	0	0	0	0	0	0	0	0	0	0	0	0	0	0	0	0	0
chr1_116384014_116384842_+	ENSG00000163399.15	ATP1A1	chr1	116384014	116384842	+	ENST00000295598.9	2	3	0	0	0	0	0	0	0	0	0	0	0	0	0	0	0	0	0	0	0	0	0	0	0	0	0	0	0	0	0	0	0	0	0	0	0	0	0	0	0	0
chr1_116384014_116387491_+	ENSG00000163399.15	ATP1A1	chr1	116384014	116387491	+	ENST00000295598.9	2	4	0	0	0	0	0	0	0	0	0	0	0	0	0	0	0	0	0	0	0	0	0	0	0	0	0	0	0	0	0	0	0	0	0	0	0	0	0	0	0	0
chr1_116384014_116389019_+	ENSG00000163399.15	ATP1A1	chr1	116384014	116389019	+	ENST00000295598.9	2	7	0	0	0	0	0	0	0	0	0	0	0	0	0	0	0	0	0	0	0.686496	0	0	0	0	0	0	0	0	0	0	0	0	0	0	0	0	0	0	0.183442	0	0
chr1_116384014_116390411_+	ENSG00000163399.15	ATP1A1	chr1	116384014	116390411	+	ENST00000295598.9	2	9	0	0	0	0	0	0	0	0	0	0	0	0	0	0	0	0	0	0	0	0	0	0	0	0	0	0	0	0	0	0	0	0	0.225925	0	0	0	0	0	0	0
chr1_116384014_116392988_+	ENSG00000163399.15	ATP1A1	chr1	116384014	116392988	+	ENST00000295598.9	2	11	0	0	0	0	0	0	0	0	0	0	0	0	0	0	0	0	0	0	0.748926	0	0	0	0	0	0	0	0	0	0	0	0	0	0	0	0	0	0	0	0	0.506118
chr1_116384014_116393723_+	ENSG00000163399.15	ATP1A1	chr1	116384014	116393723	+	ENST00000295598.9	2	12	0	0	0	0	0	0	0	0	0	0	0	0	0	0	0	0	0	0	0.22612	0	0	0	0	0	0	0	0	0	0	0	0	0	0	0	0	0	0	0	0	0
chr1_116384014_116401655_+	ENSG00000163399.15	ATP1A1	chr1	116384014	116401655	+	ENST00000295598.9	2	21	0	0	0	0	0	0	0.255961	0	0	0	0	0.24094	0	0	0	0	0	0	0	0	0	0	0	0	0	0	0	0	0.297656	0	0	0	0	0.188509	0	0	0	0	0	0
chr1_116384014_116403975_+	ENSG00000163399.15	ATP1A1	chr1	116384014	116403975	+	ENST00000295598.9	2	22	0	0	0	0	0	0	0	0	0	0	0	0	0	0	0	0	0	0	0	0	0	0	0	0	0	0	0	0	0	0	0	0	0	0	0	0	0	0	0	0
chr1_116387288_116396734_+	ENSG00000163399.15	ATP1A1	chr1	116387288	116396734	+	ENST00000295598.9	4	14	0	0	0	0	0	0	0	0	0	0	0	0	0	0	0	0	0	0	0	0	0	0	0	0	0	0	0	0	0	0	0	0	0	0	0	0.227166	0	0	0	0
chr1_116387288_116401655_+	ENSG00000163399.15	ATP1A1	chr1	116387288	116401655	+	ENST00000295598.9	4	21	0	0	0	0	0	0	0	0	0	0	0	0	0	0	0	0	0	0	0	0	0	0	0	0	0	0	0	0	0	0	0	0	0	0	0	0	0	0	0	0
chr1_116388638_116401655_+	ENSG00000163399.15	ATP1A1	chr1	116388638	116401655	+	ENST00000295598.9	6	21	0	0	0	0	0	0	0	0	0	0	0	0	0	0	0	0	0	0.422015	0	0	0	0	0	0	0	0	0	0	0	0	0	0	0	0	0	0	0	0	0	0
chr1_116388638_116403975_+	ENSG00000163399.15	ATP1A1	chr1	116388638	116403975	+	ENST00000295598.9	6	22	0	0	0	0	0	0.217621	0	0	0	0	0	0	0	0	0	0	0	0	0	0	0	0	0	0	0	0	0	0	0	0	0	0	0	0	0	0	0	0	0	0
chr1_116388902_116398789_+	ENSG00000163399.15	ATP1A1	chr1	116388902	116398789	+	ENST00000295598.9	7	16	0	0	0	0	0	0	0	0	0	0	0	0	0	0.373418	0	0	0	0	0	0	0	0	0	0	0	0	0	0	0	0	0	0	0	0	0	0	0	0	0	0
chr1_116389439_116390411_+	ENSG00000163399.15	ATP1A1	chr1	116389439	116390411	+	ENST00000295598.9	8	9	0	0	0	0	0	0	0	0	0	0	0	0	0	0	0	0	0	0	0.22612	0	0	0	0	0	0	0	0	0	0	0	0	0	0	0	0	0	0	0	0	0
chr1_116393531_116398789_+	ENSG00000163399.15	ATP1A1	chr1	116393531	116398789	+	ENST00000295598.9	12	16	0	0	0	0	0	0	0	0	0	0	0	0	0	0	0	0	0	0	0	0	0	0	0	0	0	0	0	0	0	0	0	0	0	0	0	0	0	0	0	0
chr1_116396598_116401655_+	ENSG00000163399.15	ATP1A1	chr1	116396598	116401655	+	ENST00000295598.9	14	21	0	0	0	0	0	0	0	0	0	0	0	0	0	0	0	0	0	0	0	0	0	0	0	0	0	0	0	0	0	0	0	0	0	0	0	0	0	0	0	0
chr1_116397888_116398038_+	ENSG00000163399.15	ATP1A1	chr1	116397888	116398038	+	ENST00000295598.9	15	15	0	0	0	0	0	0	0	0	0	0	0	0	0	0	0.241586	0	0	0	0	0	0	0	0	0	0	0	0	0	0	0	0	0	0	0	0	0	0	0	0	0
chr1_116398621_116399084_+	ENSG00000163399.15	ATP1A1	chr1	116398621	116399084	+	ENST00000295598.9	16	17	0	0	0	0	0	0	0	0	0	0	0	0	0	0	0	0	0	0	0	0	0	0	0	0	0	0	0	0	0	0	0	0	0	0	0.257402	0	0	0	0	0
chr1_116398621_116401655_+	ENSG00000163399.15	ATP1A1	chr1	116398621	116401655	+	ENST00000295598.9	16	21	0	0	0	0	0	0	0	0	0	0	0	0	0	0	0	0	0	0	0	0	0	0	0	0	0	0	0	0	0	0	0	0	0	0	0	0	0	0	0	0
chr1_116398930_116401260_+	ENSG00000163399.15	ATP1A1	chr1	116398930	116401260	+	ENST00000295598.9	17	20	0	0	0	0	0	0	0	0	0	0	0	0	0	0	0	0	0	0	0	0	0	0	0	0	0	0	0	0	0	0	0	0	0	0	0	0	0	0	0	0
chr1_169111370_169127408_+	ENSG00000143153.12	ATP1B1	chr1	169111370	169127408	+	ENST00000367816.5	3	5	0	0	0	0	0	0	0	0	0	0	0	0	0	0	0	0	0	0	0	0	0	0	0	0	0	0	0	0.176584	0	0	0	0	0	0	0	0	0	0	0	0
chr1_169111370_169130090_+	ENSG00000143153.12	ATP1B1	chr1	169111370	169130090	+	ENST00000367816.5	3	6	0	0	0	0	0	0	0	0	0	0	0	0	0	0	0.724757	0	0	0	0	0	0	0	0	0	0	0	0	0	0	0	0	0	0	0	0	0	0	0	0	0
chr1_169124884_169127408_+	ENSG00000143153.12	ATP1B1	chr1	169124884	169127408	+	ENST00000367816.5	4	5	0	0	0	0	0	0	0	0	0	0	0	0	0	0	0	0.291251	0	0	0	0	0	0	0	0	0	0	0	0	0	0	0	0	0	0	0	0	0	0	0	0
chr1_169124884_169130090_+	ENSG00000143153.12	ATP1B1	chr1	169124884	169130090	+	ENST00000367816.5	4	6	0	0	0	0	0	0	0	0.276959	0	0	0	0	0.285577	0	0	0	0	0	0	0	0	0	0	0	0	0	0	0	0	0	0	0	0	0	0	0	0	0	0	0
chr1_203682742_203683398_+	ENSG00000058668.14	ATP2B4	chr1	203682742	203683398	+	ENST00000367218.7	2	2	0	0	0	0	0	0.256886	0	0	0	0	0	0	0	0.186709	0	0	0	0	0	0	0.958564	0.187335	0	0	0	0	0	0	0.352232	0.989885	0	0	0	0.528934	0	0	0	0	0	0
chr1_203698157_203708104_+	ENSG00000058668.14	ATP2B4	chr1	203698157	203708104	+	ENST00000367218.7	3	10	0	0	0	0	0	0	0	0	0	0	0	0	0	0	0	0	0	0	0	0	0	0	0	0	0	0	0	0	0	0	0.838668	0	0	0	0	0	0	0	0	0
chr1_203698157_203709542_+	ENSG00000058668.14	ATP2B4	chr1	203698157	203709542	+	ENST00000367218.7	3	11	0	0	0	0	0	0	0	0	0	0	0	0	0	0	0.241586	0	0	0	0	0	0	0	0	0	0	0	0	0	0	0	0	0	0	0	0	0	0	0	0	0
chr1_203698157_203723988_+	ENSG00000058668.14	ATP2B4	chr1	203698157	203723988	+	ENST00000367218.7	3	19	0	0	0	0	0	0	0	0	0	0	0	0	0	0	0	0	0	0	0	0	0	0	0	0	0	0	0	0	0	0	0	0	0	0	0	0	0	0	0.359576	0
chr1_203698157_203727571_+	ENSG00000058668.14	ATP2B4	chr1	203698157	203727571	+	ENST00000367218.7	3	20	0	0	0	0	0	0	0	0	0.267055	0	0	0	0	0	0	0	0	0	0	0	0.234719	0	0	0	0	0	0	0	0	0	0	0	0	0.188509	0	0	0	0	0	0
chr1_203703652_203703813_+	ENSG00000058668.14	ATP2B4	chr1	203703652	203703813	+	ENST00000367218.7	8	8	0	0	0	0	0	0	0	0	0	0	0	0	0	0	0	0	0	0	0	0	0	0	0	0	0	0	0	0	0	0	0	0	0	0	0	0	0	0	0	0
chr1_203703652_203722689_+	ENSG00000058668.14	ATP2B4	chr1	203703652	203722689	+	ENST00000367218.7	8	18	0	0.343846	0	0	0	0.217621	0	0	0	0	0.286956	0	0	0.186709	0	0.91469	0.263939	0	0.291262	0	0	0.340888	0	0.424084	0	0.432484	0.297039	0	1.0567	0	0	0	0	0	0.514804	0	0	0	0	0
chr1_203703652_203727571_+	ENSG00000058668.14	ATP2B4	chr1	203703652	203727571	+	ENST00000367218.7	8	20	0	0	0	0	0	0	0	0	0	0	0	0	0	0	0	0	0	0	0	0	0	0	0	0	0	0	0	0	0	0	0	0	0	0	0	0	0	0	0	0.364473
chr1_203707009_203708104_+	ENSG00000058668.14	ATP2B4	chr1	203707009	203708104	+	ENST00000367218.7	9	10	0	0	0	2.5555	0	1.73347	0.864499	0	2.27248	4.56183	0.790169	1.67966	0	0.373972	0	2.21408	0.527878	0.292181	0.457664	0	3.19018	0.340888	0	0.716212	0	0	2.8805	0.3276	1.48828	2.16781	0.559112	0	0.682569	0.717444	0.988299	1.35848	0.802255	0	3.90389	0
chr1_203707009_203709542_+	ENSG00000058668.14	ATP2B4	chr1	203707009	203709542	+	ENST00000367218.7	9	11	0	0	0	0	0	0	0	0	0	0	0	0	0	0	0	0	0	0	0	0	0	0	0	0	0	0	0	0	0	0	0	0	0	0	0	0	0	0	0	0
chr1_203707009_203714277_+	ENSG00000058668.14	ATP2B4	chr1	203707009	203714277	+	ENST00000367218.7	9	15	0	0	0	0	0	0	0	0	0	0	0	0	0	0	0	0	0	0	0	0	0	0	0	0	0	0	0.496832	0	0.595312	0	0	0	0	0	0	0	0	0	0	0
chr1_203707862_203712139_+	ENSG00000058668.14	ATP2B4	chr1	203707862	203712139	+	ENST00000367218.7	10	13	0	0	0	0	0	0	0	0.414318	0	0	0	0	0	0	0	0	0	0	0	0	0	0	0	0	0	0	0	0	0	0.280616	0	0	0.225925	0	0	0	0	0	0	0
chr1_203707862_203714277_+	ENSG00000058668.14	ATP2B4	chr1	203707862	203714277	+	ENST00000367218.7	10	15	0	0	0	0	0	0	0	0	0	0	0	0	0	0	0	0	0	0	0	0	0	0	0	0	0	0	0	0	0	0	0	0	0	0	0	0	0	0	0	0
chr1_203707862_203720740_+	ENSG00000058668.14	ATP2B4	chr1	203707862	203720740	+	ENST00000367218.7	10	16	0	0	0	0	0	0	0	0	0	0	0	0	0	0	0	0	0	0	0	0	0	0	0.276394	0	0	0	0	0	0	0.250246	0	0	0	0	0	0	0	0	0	0
chr1_203710877_203714277_+	ENSG00000058668.14	ATP2B4	chr1	203710877	203714277	+	ENST00000367218.7	12	15	0	0	0	0	0	0	0	0	0	0	0	0.24094	0	0	0	0	0	0	0	0	0.234719	0	0	0	0	0	0	0	0	0.280616	0	0	0	0	0	0	0	0	0	0
chr1_203710877_203721410_+	ENSG00000058668.14	ATP2B4	chr1	203710877	203721410	+	ENST00000367218.7	12	17	0	0	0	0	0	0	0	0	0	0	0	0	0	0	0	0	0	0	0.228832	0	0	0	0	0	0	0	0	0	0	0	0	0	0	0	0	0	0	0	0	0
chr1_203710877_203722689_+	ENSG00000058668.14	ATP2B4	chr1	203710877	203722689	+	ENST00000367218.7	12	18	0	0	0	0	0	0	0.320729	0.414318	0	0	0	0.24094	0	0	0	0.302829	0	0.422015	0.291262	0	0	0.493394	0	0	0	0	0	0	0.561837	0.989885	0	0.429836	1.75639	0.261939	0	0	0	0	0.719152	0
chr1_203710877_203723988_+	ENSG00000058668.14	ATP2B4	chr1	203710877	203723988	+	ENST00000367218.7	12	19	0	0	0	0	0	0	0	0	0	0.629299	0	0	0	0	0	0	0	0	0	0	0	0	0	0	0	0	0	0	0	0	0	0	0	0	0	0	0	0	0	0
chr1_203710877_203727571_+	ENSG00000058668.14	ATP2B4	chr1	203710877	203727571	+	ENST00000367218.7	12	20	0	0	0.406021	0	0	0	0	0	0	0	0	0	0	0	0	0	0	0	0	0	0	0	0	0	0	0	0	0	0	0	0	0	0	0	0	0	0	0	0	0
chr1_203713165_203721410_+	ENSG00000058668.14	ATP2B4	chr1	203713165	203721410	+	ENST00000367218.7	14	17	0	0	0	0	0	0	0	0	0	0	0	0	0	0	0	0	0	0	0	0	0	0	0	0	0	0	0	0	0	0	0	0	0	0	0	0	0	0	0	0
chr1_203713165_203722689_+	ENSG00000058668.14	ATP2B4	chr1	203713165	203722689	+	ENST00000367218.7	14	18	0	0	0	0	0	0	0	0	0	0	0	0	0	0	0	0	0	0	0	0	0	0	0	0	0	0	0	0	0	0	0	0	0	0	0	0	0	0	0	0
chr1_203713165_203723988_+	ENSG00000058668.14	ATP2B4	chr1	203713165	203723988	+	ENST00000367218.7	14	19	0	0	0	0	0	0	0	0	0	0	0	0	0	0	0	0	0	0	0	0	0	0	0	0	0	0	0	0	0	0	0	0	0	0	0	0	0	0	0	0
chr1_203713165_203727571_+	ENSG00000058668.14	ATP2B4	chr1	203713165	203727571	+	ENST00000367218.7	14	20	0	0	0	0	0	0	0.648374	0	0	0	0	0	0	0	0	0	0	0	0	0	0	0	0	0	0	0	0	0	0	0	0	0	0	0	0	0	0	0	0.344189	0
chr1_203720549_203721410_+	ENSG00000058668.14	ATP2B4	chr1	203720549	203721410	+	ENST00000367218.7	16	17	0	0.406923	0	0	0	0	0	0.414318	0.281873	0	0	0	0.285577	0	0	0.302829	0	0	0	0	0.262044	0.170444	0	0	0	0	0	0	0	0	0	0.298654	0.225925	0.340425	0.54022	0	0	0	0	0.364473
chr1_203720549_203722689_+	ENSG00000058668.14	ATP2B4	chr1	203720549	203722689	+	ENST00000367218.7	16	18	0	0	0	0	0	0	0	0	0	0	0	0	0	0	0	0.582502	0	0	0	0	0	0.187335	0.276394	0	0	0	0	0	0.561837	0	0	0	0	0	0	0	0	0	0.688377	0
chr1_203720549_203723988_+	ENSG00000058668.14	ATP2B4	chr1	203720549	203723988	+	ENST00000367218.7	16	19	0	0	0	0	0	0	0	0	0	0	0	0	0	0	0	0	0	0	0	0	0	0	0	0	0	0	0	0	0	0.841849	0	0	0	0	0	0	0	0	0	0
chr1_203720549_203727571_+	ENSG00000058668.14	ATP2B4	chr1	203720549	203727571	+	ENST00000367218.7	16	20	0	0	0	0	0	0	0	0	0	0	0	0	0	0	0	0	0	0	0	0	0	0	0	0	0	0	0	0	0	0	0	0	0	0	0	0	0	0	0	0
chr1_203722478_203722689_+	ENSG00000058668.14	ATP2B4	chr1	203722478	203722689	+	ENST00000367218.7	18	18	0	0	0	0	0	0	0.255961	0	0	0	0	0	0	0	0	0	0	0	0	0	0	0	0	0	0	0	0	0	0	0	0	0	0	0	0	0	0	0	0	0
chr1_203722478_203723988_+	ENSG00000058668.14	ATP2B4	chr1	203722478	203723988	+	ENST00000367218.7	18	19	0	0	0	0	0	0	0	0	0	0	0	0	0	0	0	0	0	0	0	0	0	0	0	0	0	0	0	0	0	0.280616	0	0	0	0.261939	0	0	0	0	0	0
chr1_203722478_203727571_+	ENSG00000058668.14	ATP2B4	chr1	203722478	203727571	+	ENST00000367218.7	18	20	0	0	0	0	0	0	0	0	0	0	0	0	0	0	0	0.302829	0	0	0	0	0	0	0	0	0	0	0	0	0	0	0	0	0	0	0	0	0	0	0	0.364473
chr1_203723881_203727571_+	ENSG00000058668.14	ATP2B4	chr1	203723881	203727571	+	ENST00000367218.7	19	20	0	0	0	0	0	0	0	0	0	0	0	0	0	0	0	0	0	0	0	0	0	0.187335	0.331496	0	0.692705	0	0	0	0	0	0	0	0	0	0	0	0	0	0	0
chr1_203723881_203733400_+	ENSG00000058668.14	ATP2B4	chr1	203723881	203733400	+	ENST00000367218.7	19	21	0	0	0	0	0	0	0	0	0	0	0	0	0	0	0	0	0	0	0	0	0	0	0	0	0	0	0	0	0	0	0	0	0	0	0	0	0	0	0.359576	0
chr1_111456086_111456755_+	ENSG00000116459.10	ATP5F1	chr1	111456086	111456755	+	ENST00000369722.7	4	5	0	0	0	0	0	0	0	0	0	0	0	0	0	0	0	0	0	0	0	0	0	0	0	0	0	0	0	0	0	0	0	0	0	0	0	0	0	0	0	0
chr1_111456086_111459636_+	ENSG00000116459.10	ATP5F1	chr1	111456086	111459636	+	ENST00000369722.7	4	6	0	0	0	0	0.448354	0.256886	0.216125	0	0	0	0.286956	0.24094	0.620102	0	0.800711	0.623439	0.547492	0	0.22612	0.252769	0	0	0	0.399049	0	0	0	0	0.704464	0	0.827238	0	0	0	0	0.710375	0	0.183442	0.344189	0
chr1_43975800_43976824_+	ENSG00000117410.13	ATP6V0B	chr1	43975800	43976824	+	ENST00000472174.6	2	6	0	0	0	0	0	0	0	0	0	0	0	0.438693	0	0	0	0	0	0	0	0	0	0	0	0	0	0	0	0	0	0	0	0	0	0	0	0	0	0	0	0
chr1_43975800_43977216_+	ENSG00000117410.13	ATP6V0B	chr1	43975800	43977216	+	ENST00000472174.6	2	7	0	0	0	0	0	0	0	0	0	0	0	0	0	0	0	0	0	0	0	0	0	0	0	0	0	0	0	0	0	0	0	0	0	0	0	0	0	0	0	0
chr1_43976090_43976824_+	ENSG00000117410.13	ATP6V0B	chr1	43976090	43976824	+	ENST00000472174.6	3	6	0	0	0	0	0	0	0	0	0	0	0	0	0	0	0	0	0	0	0	0	0	0	0	0	0	0	0	0	0	0	0	0	0	0	0	0	0	0	0	0.506118
chr1_43976090_43977216_+	ENSG00000117410.13	ATP6V0B	chr1	43976090	43977216	+	ENST00000472174.6	3	7	0	0	0	0	0.672531	0	0	0	0	0	0	0	0	0	0	0	0	0	0	0	0	0	0	0	0	0	0	0	0	0	0	0	0	0	0	0	0.534836	0	0	0
chr1_154334107_154334591_+	ENSG00000143515.16	ATP8B2	chr1	154334107	154334591	+	ENST00000368489.3	10	11	0	0	0	0	0	0	0	0	0	0	0	0	0	0	0	0	0	0	0	0	0	0	0	0	0	0	0	0	0	0	0	0	0	0	0	0	0	0.733767	0	0
chr1_154334107_154341062_+	ENSG00000143515.16	ATP8B2	chr1	154334107	154341062	+	ENST00000368489.3	10	13	0	0	0	0	0	0	0	0	0	0	0	0	0.620102	0	0	0	0	0	0	0	0	0	0	0.424084	0	0.468839	0	0	0	0	0	0	0	0	0	0	0	0	0	0
chr1_154337348_154337544_+	ENSG00000143515.16	ATP8B2	chr1	154337348	154337544	+	ENST00000368489.3	12	12	0.791331	0	0	0	0	0	0	0	0	0	0	0	0	0	0	0	0	0	0	0.228857	0	0	0	0	0	0	0	0	0	0	0	0	0	0	0	0	0.447303	0	0	0
chr1_154337348_154341062_+	ENSG00000143515.16	ATP8B2	chr1	154337348	154341062	+	ENST00000368489.3	12	13	0	0	0	0	0	0	0	0	0	0	0	0	0	0	0	0	0	0	0	0	0	0	0	0	0	0	0	0	0	0	0	0	0	0	0	0	0	0.183442	0	0
chr1_154343893_154344057_+	ENSG00000143515.16	ATP8B2	chr1	154343893	154344057	+	ENST00000368489.3	18	18	0	0	0	0	0	0	0	0	0	0	0	0	0	0	0	0	0	0	0	0	0	0.357779	0	0	0	0	0	0	0	0	0	0	0	0	0	0	0	0	0	0
chr1_154343893_154344254_+	ENSG00000143515.16	ATP8B2	chr1	154343893	154344254	+	ENST00000368489.3	18	19	0	0	0	0	0	0	0	0	0	0	0	0	0	0.168313	0	0	0	0	0	0	0	0	0	0	0	0	0	0	0	0	0	0	0	0	0	0	0	0	0	0
chr1_154343893_154344500_+	ENSG00000143515.16	ATP8B2	chr1	154343893	154344500	+	ENST00000368489.3	18	20	0	0	0	0	0	0	0	0	0	0	0	0	0	0	0	0	0	0	0	0	0	0	0	0	0	0	0	0	0	0	0	0	0	0	0	0	0	0	0	0
chr1_46635897_46645256_-	ENSG00000123472.12	ATPAF1	chr1	46635897	46645256	-	ENST00000492233.5	3	1	0	0	0	0	0	0	0	0	0	0	0	0	0	0	0	0	0	0	0	0	0	0	0	0	0	0	0	0	0	0	0	0.252936	0	0	0	0	0	0	0	0
chr1_46652581_46665364_-	ENSG00000123472.12	ATPAF1	chr1	46652581	46665364	-	ENST00000542495.5	7	2	0	0	0	0	0	0	0	0	0	0	0	0	0	0	0	0	0	0	0	0	0	0	0	0	0	0	0	0	0	0	0	0	0	0	0	0	0	0	0	0
chr1_46643194_46665364_-	ENSG00000123472.12	ATPAF1	chr1	46643194	46665364	-	ENST00000542495.5	9	2	0	0	0	0	0	0	0	0	0	0	0	0	0	0	0	0	0	0	0	0	0	0	0	0	0	0	0	0	0	0	0	0	0	0	0	0	0	0	0	0
chr1_46643194_46645256_-	ENSG00000123472.12	ATPAF1	chr1	46643194	46645256	-	ENST00000542495.5	9	8	0	0.306634	0.494341	0	0	0	0	0	0	0	0	0	0	0	0	0.302829	0.35381	0	0	0	0	0	0	0	0	0	0.297039	0	0	0	0.279556	0	0	0	0	0	0	0	0.688377	0
chr1_109486057_109490392_+	ENSG00000162650.16	ATXN7L2	chr1	109486057	109490392	+	ENST00000463678.5	3	10	0	0	0	0	0	0	0	0	0	0	0	0	0	0	0	0	0	0	0	0	0	0	0	0	0	0	0	0	0.352232	0	0	0	0	0	0	0	0	0	0	0
chr1_25835022_25837554_-	ENSG00000127423.10	AUNIP	chr1	25835022	25837554	-	ENST00000538789.5	3	2	0	0	0	0	0	0	0	0	0	0	0	0	0	0	0	0	0	0	0	0	0	0	0	0	0	0	0	0	0	0.229511	0	0	0	0	0	0	0	0	0	0
chr1_1374000_1374790_-	ENSG00000175756.13	AURKAIP1	chr1	1374000	1374790	-	ENST00000338338.9	3	2	0	0	0	0	0	0	0	0	0	0	0	0	0	0	0	0	0	0	0	0	0	0	0	0	0	0	0	0	0	0	0.279556	0	0	0	0	0	0	0	0	0
chr1_179368800_179383544_+	ENSG00000162779.21	AXDND1	chr1	179368800	179383544	+	ENST00000367618.7	3	8	0	0	0	0	0	0	0	0	0	0	0	0	0	0	0	0	0	0	0	0	0	0	0	0	0	0	0	0	0	0	0	0.298654	0	0	0	0	0	0	0	0
chr1_179368800_179395202_+	ENSG00000162779.21	AXDND1	chr1	179368800	179395202	+	ENST00000367618.7	3	11	0.270788	0	0	0	0	0	0	0	0	0	0	0	0	0	0	0	0	0	0	0	0	0.246697	0	0	0	0	0	0	0	0	0	0	0	0	0	0	0	0	0	0
chr1_179368800_179411266_+	ENSG00000162779.21	AXDND1	chr1	179368800	179411266	+	ENST00000367618.7	3	12	0	0	0	0	0	0	0	0	0	0	0	0	0	0	0	0	0	0	0	0	0	0	0	0	0	0.432484	0	0	0	0	0	0	0	0	0	0	0	0	0	0
chr1_179368800_179430606_+	ENSG00000162779.21	AXDND1	chr1	179368800	179430606	+	ENST00000367618.7	3	14	0	0	0	0	0	0	0	0	0.281873	0	0	0	0	0	0	0	0	0	0	0	0	0	0	0	0.692705	0	0	0	0	0	0	0	0	0	0	0	0	0	0	0
chr1_179369975_179383544_+	ENSG00000162779.21	AXDND1	chr1	179369975	179383544	+	ENST00000367618.7	4	8	0	0	0	0	0	0	0	0	0	0	0	0	0	0	0	0	0	0	0	0	0	0	0	0	0	0	0	0	0	0	0	0	0	0.188509	0	0	0	0	0	0
chr1_179378637_179395202_+	ENSG00000162779.21	AXDND1	chr1	179378637	179395202	+	ENST00000367618.7	5	11	0	0	0	0	0	0	0	0	0	0	0	0	1.03778	0	0	0	0	0	0	0.228857	0	0	0	0	0	0	0.298068	0	0	0	0	0.597308	0	0	0	0	0	0.16834	0	0
chr1_179378637_179432342_+	ENSG00000162779.21	AXDND1	chr1	179378637	179432342	+	ENST00000367618.7	5	15	0	0	0	0	0	0	0	0	0	0	0	0	0	0	0	0	0	0	0	0	0	0	0	0	0	0	0	0	0	0	0	0	0	0	0	0	0	0	0	0
chr1_179385238_179395202_+	ENSG00000162779.21	AXDND1	chr1	179385238	179395202	+	ENST00000367618.7	9	11	0	0	0	0	0	0	0	0	0	0	0	0	0	0	0	0	0	0	0	0.276051	0	0	0	0	0	0	0	0	0	0	0	0	0	0	0	0	0	0	0	0
chr1_179393903_179432342_+	ENSG00000162779.21	AXDND1	chr1	179393903	179432342	+	ENST00000367618.7	10	15	0	0	0	0	0	0	0	0	0	0	0	0	0	0	0	0	0	0	0	0	0	0	0	0	0	0	0.298068	0	0	0	0	0	0	0	0	0	0	0	0	0
chr1_179411146_179432342_+	ENSG00000162779.21	AXDND1	chr1	179411146	179432342	+	ENST00000367618.7	12	15	0	0	0	0	0	0	0	0	0.281873	0	0	0	0	0	0	0	0	0	0	0	0	0	0	0	0	0	0	0	0	0	0	0	0	0	0	0	0	0	0	0
chr1_179483128_179492951_+	ENSG00000162779.21	AXDND1	chr1	179483128	179492951	+	ENST00000367618.7	18	20	0	0	0	0	0	0	0	0	0	0	0	0	0	0	0	0	0	0	0	0	0	0	0	0	0	0	0	0	0	0	0	0.298654	0	0	0	0	0	0	0	0
chr1_179491538_179492951_+	ENSG00000162779.21	AXDND1	chr1	179491538	179492951	+	ENST00000367618.7	19	20	0	0	0	0	0	0	0	0	0	0	0	0	0	0	0	0	0	0	0	0	0	0	0	0.424084	0	0	0	0	0	0	0	1.28951	0	0	0	0	0	0	0	0
chr1_179525334_179534962_+	ENSG00000162779.21	AXDND1	chr1	179525334	179534962	+	ENST00000367618.7	22	25	0	0	0	0	0	0	0	0	0	0	0	0	0	0	0	0	0	0	0.228832	0	0	0	0	0	0	0	0	0	0	0	0	0.72849	0	0	0	0	0	0	0	0
chr1_179528327_179534962_+	ENSG00000162779.21	AXDND1	chr1	179528327	179534962	+	ENST00000367618.7	23	25	0	0	0	0	0	0	0	0	0	0	0	0	0	0	0	0	0	0	0	0	0	0	0	0	0	0	0	0	0	0	0	0.682772	0	0	0	0	0	0	0	0
chr1_179393903_179449213_+	ENSG00000162779.21	AXDND1	chr1	179393903	179449213	+	ENST00000461179.2	8	15	0	0	0	0	0	0	0	0	0	0	0	0	0	0	0	0	0	0	0	0	0	0	0	0	0	0	0	0	0	0	0	0	0	0	0	0	0	0	0	0
chr1_33081388_33098179_+	ENSG00000142920.16	AZIN2	chr1	33081388	33098179	+	ENST00000294517.10	2	10	0	0	0	0	0	0	0	0	0	0	0	0	0	0	0	0	0	0	0	0	0	0	0	0	0	0	0	0	0	0	0	0	0	0	0	0	0	0	0.359576	0
chr1_33083954_33098179_+	ENSG00000142920.16	AZIN2	chr1	33083954	33098179	+	ENST00000294517.10	5	10	0	0	0	0	0	0	0	0	0	0	0	0	0	0	0	0	0	0	0	0	0	0	0	0	0	0	0.298068	0	0	0	0	0	0	0	0	0	0	0	0	0
chr1_33092050_33098179_+	ENSG00000142920.16	AZIN2	chr1	33092050	33098179	+	ENST00000294517.10	6	10	0	0	0	0	0	0	0	0	0	0	0	0	0	0	0	0	0	0	0	0	0	0	0	0	0	0	0	0	0	0	0	0	0	0	0	0	0	0	0	0
chr1_33093282_33098179_+	ENSG00000142920.16	AZIN2	chr1	33093282	33098179	+	ENST00000294517.10	7	10	0	0	0	0	0	0	0	0	0	0	0	0	0	0	0	0	0	0	0	0	0	0	0	0	0	0	0	0	0	0	0	0	0	0	0	0	0	0	0	0
chr1_33093282_33118116_+	ENSG00000142920.16	AZIN2	chr1	33093282	33118116	+	ENST00000294517.10	7	11	0	0	0	0	0	0	0	0	0	0	0	0	0	0	0	0	0	0	0	0	0	0	0	0	0	0	0	0	0.561837	0	0	0	0	0	0	0	0	0	0	0
chr1_33096707_33098179_+	ENSG00000142920.16	AZIN2	chr1	33096707	33098179	+	ENST00000294517.10	9	10	0	0	0	0	0	0	0	0	0	0	0	0	0	0	0	0	0	0	0	0	0	0	0	0	0	0	0	0	0	0	0	0	0	0	0	0	0	0	0.688377	0
chr1_235484322_235494828_-	ENSG00000162885.12	B3GALNT2	chr1	235484322	235494828	-	ENST00000366600.7	4	2	0.241694	0	0	0	0	0	0	0	0	0	0	0	0	0	0.241586	0	0	0	0	0	0	0	0	0	0	0	0	0.533761	0	0	0	0	0	0	0	0	0	0	0	0
chr1_235480054_235494828_-	ENSG00000162885.12	B3GALNT2	chr1	235480054	235494828	-	ENST00000366600.7	5	2	0.725083	0.687692	0.494341	0.604644	0.934823	1.29822	0	0	1.47132	0	0.400444	0.318948	0.977431	2.63618	0.966343	1.57286	0.881688	0.584363	0.22612	0.78096	3.05492	1.07334	0.829183	2.91852	1.16702	0.791825	1.19227	0.882921	0.892968	4.39783	1.9226	0.551589	0.903702	0.377018	1.0063	1.5345	0.827579	1.20992	5.79188	0
chr1_235480054_235489268_-	ENSG00000162885.12	B3GALNT2	chr1	235480054	235489268	-	ENST00000366600.7	5	3	0	0	0	0	0	0	0	0	0	0	0	0	0	0	0	0	0	0	0	0	0	0	0	0	0	0	0	0	0	0	0	0	0.88059	0.188509	0	0	0	0	0	0
chr1_235480054_235484515_-	ENSG00000162885.12	B3GALNT2	chr1	235480054	235484515	-	ENST00000366600.7	5	4	0	0	0	0	0	0	0	0	0	0	0	0	0	0	0	0	0	0	0	0	0	0.170444	0	0	0	0	0	0	0	0	0	0	0	0	0	0	0.267418	0	0	0
chr1_235470850_235494828_-	ENSG00000162885.12	B3GALNT2	chr1	235470850	235494828	-	ENST00000366600.7	6	2	0	0	0	0	0.759961	0.217621	0	0	0	0	0	0	0	0	0	0	0	0.584363	0.291262	0	0	0.357779	1.59551	0	0	0	0.79387	0.529753	0	0.709268	0.279556	1.02714	0.808958	0.188509	0	0	0	0	0	0.364473
chr1_235470850_235484515_-	ENSG00000162885.12	B3GALNT2	chr1	235470850	235484515	-	ENST00000366600.7	6	4	0.263777	0.343846	0	1.20929	0	0	0.255961	0.22942	0.267055	0.581	0.503213	0	0.620102	0	0	0	0	0.292181	0.975045	0	0.262044	0	0	0.292128	0.692705	0	0	0.353169	0.649888	0	0	0.597308	0	0	0	0.227166	0	0.16834	0	0
chr1_235470850_235480149_-	ENSG00000162885.12	B3GALNT2	chr1	235470850	235480149	-	ENST00000366600.7	6	5	0	0	0	0	0	0	0	0	0	0	0	0	0	0	0	0	0	0	0	0	0	0	0	0	0	0	0	0	0	0	0	0	0	0	0	0	0	0	0	0
chr1_235465636_235494828_-	ENSG00000162885.12	B3GALNT2	chr1	235465636	235494828	-	ENST00000366600.7	7	2	0	0	0	0.604644	0.448354	0.256886	0.255961	0.414318	0	0.547384	0.538562	0.318948	0	0.935208	0.241586	0	0	0.913069	0	0.252769	0	0	0	0.584256	0	0	0.79387	0.353169	0	1.29124	0.547682	0	0	0	0	0	1.17097	0	2.04668	0
chr1_235465636_235489268_-	ENSG00000162885.12	B3GALNT2	chr1	235465636	235489268	-	ENST00000366600.7	7	3	0	0	0	0	0	0	0	0	0	0	0	0	0	0	0	0	0	0	0	0	0	0	0	0	0	0	0	0	0	0	0.559112	0	0	0	0	0	0	0	0	0
chr1_235465636_235484515_-	ENSG00000162885.12	B3GALNT2	chr1	235465636	235484515	-	ENST00000366600.7	7	4	0.241694	0.687692	0	0	0	0	0	0	0	0	0.251606	0	0	0	0.559125	0	0.273746	0	0.291262	0	0	0	0	0	0	0	0	0.504184	0	0.280616	0.279556	0	1.21708	0	0	0.227166	0.292743	0	0	0
chr1_235465636_235480149_-	ENSG00000162885.12	B3GALNT2	chr1	235465636	235480149	-	ENST00000366600.7	7	5	0	0	0	0	0	0	0	0	0	0	0	0	0	0	0	0	0	0	0	0	0	0	0	0	0	0	0	0	0	0	0	0	0.341285	0	0	0	0	0	0	0
chr1_235465636_235470960_-	ENSG00000162885.12	B3GALNT2	chr1	235465636	235470960	-	ENST00000366600.7	7	6	0	1.56461	0	0	0	0.217621	0	0	1.09786	0.547384	0	0	0.620102	0	0	0.291251	0	0	1.04019	0	0.234719	0.511333	0	0.292128	0	0	0.496832	0.59448	0	0.709268	0.559112	0	0.539305	0	0.54022	0.227166	0	0.183442	1.28665	0
chr1_235458603_235484515_-	ENSG00000162885.12	B3GALNT2	chr1	235458603	235484515	-	ENST00000366600.7	8	4	0	0	0	0	0.224177	0	0	0	0	0	0	0	0	0	0	0	0	0	0	0	0	0	0	0	0	0	0	0	0	0	0	0	0	0	0	0	0	0	0	0
chr1_235458603_235470960_-	ENSG00000162885.12	B3GALNT2	chr1	235458603	235470960	-	ENST00000366600.7	8	6	0	0	0	0	0	0	0	0	0	0	0	0	0	0	0	0	0	0	0	0	0	0	0	0	0	0	0	0	0	0	0	0	0	0	0	0	0	0	0	0
chr1_235458603_235465714_-	ENSG00000162885.12	B3GALNT2	chr1	235458603	235465714	-	ENST00000366600.7	8	7	0	0	0	0	0	0	0	0	0	0	0	0	0	0.187263	0.316699	0	0	0	0	0	0	0	0	0	0	0	0	0	0	0	0	0	0	0	0	0	0	0	0	0
chr1_235455559_235494828_-	ENSG00000162885.12	B3GALNT2	chr1	235455559	235494828	-	ENST00000366600.7	9	2	0	0	0	0	0	0	0	0	0	0	0	0	0.285577	0	0.559125	0	0	0	0	0	0	0	0	0	0	0	0	0	0	0	0	0	0	0	0	0	0	0	0	0
chr1_235455559_235484515_-	ENSG00000162885.12	B3GALNT2	chr1	235455559	235484515	-	ENST00000366600.7	9	4	0	0	0	0	0	0	0	0.22942	0.267055	0	0.573911	0	0	0	0	0	0.273746	0.620888	0.228832	0	0	0.246697	0	0	0	0	0	0	0	0	0	0	1.15024	0	0	0	0.267418	0	0	0
chr1_235455559_235480149_-	ENSG00000162885.12	B3GALNT2	chr1	235455559	235480149	-	ENST00000366600.7	9	5	0	0	0	0	0	0	0	0	0	0	0	0	0	0	0	0	0	0	0	0	0	0	0	0	0	0	0	0	0	0	0	0.252936	0	0	0	0	0	0	0	0
chr1_235455559_235470960_-	ENSG00000162885.12	B3GALNT2	chr1	235455559	235470960	-	ENST00000366600.7	9	6	0	0	0	0	0	0	0	0	0	0	0	0	0	0	0	0	0	0	0	0	0	0	0	0	0	0	0	0.176584	0	0.250246	0	0	0	0	0	0	0	0	0	0
chr1_235454156_235494828_-	ENSG00000162885.12	B3GALNT2	chr1	235454156	235494828	-	ENST00000366600.7	10	2	0	0	0	0	0	0	0	0	0	0	0	0	0	0	0	0	0	0	0.228832	0	0	0	0	0	0	0	0	0	0	0	0	0	0	0	0	0.355187	0	0	0	0
chr1_235454156_235484515_-	ENSG00000162885.12	B3GALNT2	chr1	235454156	235484515	-	ENST00000366600.7	10	4	0	0	0	0	0	0	0	0	0	0	0.400444	0	0	0	0	0	0	0.422015	0.228832	0	0	0	0	0	0	0	0	0	0.595312	0	0	0	0	0	0	0	0.267418	0	0.359576	0
chr1_235454156_235470960_-	ENSG00000162885.12	B3GALNT2	chr1	235454156	235470960	-	ENST00000366600.7	10	6	0	0	0	0	0	0	0	0	0	0	0	0	0	0	0.559125	0	0	0	0.904479	0	0	0	0	0	0	0	0	0	0	0	0	0	0	0	0	0	0	0	0	0
chr1_235454156_235465714_-	ENSG00000162885.12	B3GALNT2	chr1	235454156	235465714	-	ENST00000366600.7	10	7	0	0	0	0	0	0	0	0	0	0	0	0	0	0	0	0	1.06143	0	0	0	0	0	0	0	0	0	0	0	0	0	0	0	0	0	0	0	0	0	0	0
chr1_235454156_235458786_-	ENSG00000162885.12	B3GALNT2	chr1	235454156	235458786	-	ENST00000366600.7	10	8	0	0	0	0.673104	0	0	0	0	0	0.581	0	0	0	0	0	0	0.273746	0	0	0	0.234719	0	0.932515	0	0	0	0	0	0	0	0	0	0	0	0	0	0	0	0	0
chr1_235454156_235455684_-	ENSG00000162885.12	B3GALNT2	chr1	235454156	235455684	-	ENST00000366600.7	10	9	0	0	0	0	0	0	0	0	0	0	0	0.24094	0	0	0	0	0	0	0.678359	0	0	0.170444	0	0	0	0	0	0.800641	0	0	0	0.429836	0	0	0	0	0	0	0	0
chr1_235453090_235494828_-	ENSG00000162885.12	B3GALNT2	chr1	235453090	235494828	-	ENST00000366600.7	11	2	0	0	0	0	0	0	0	0	0	0	0	0	0	0	0	0	0	0	0	0	0	0	0	0	0	0	0	0	0.352232	0	0	0	0	0	0	0	0	0	0	0
chr1_235453090_235484515_-	ENSG00000162885.12	B3GALNT2	chr1	235453090	235484515	-	ENST00000366600.7	11	4	0	0.406923	0	0	0.623215	0	0	0.276959	0	0	0	0	0.285577	0	0	0	0	0	0	0	0	0.374669	0	0	0	0	0	0	0	0	0	0	0	0	0	0.355187	0	0	0	0
chr1_235453090_235458786_-	ENSG00000162885.12	B3GALNT2	chr1	235453090	235458786	-	ENST00000366600.7	11	8	0	0	0	0	0	0	0	0	0	0	0.286956	0	0.285577	0	0	0	0	0	0	0	0	0	0	0	0	0	0	0	0	0	0	0	0	0	0	0	0	0	0	0
chr1_235453090_235455684_-	ENSG00000162885.12	B3GALNT2	chr1	235453090	235455684	-	ENST00000366600.7	11	9	0	0	0	0	0	0	0	0	0	0	0	0	0	0	0	0	0	0	0	0	0	0	0.331496	0	0	0	0	0	0	0	0	0	0	0	0	0	0	0.366884	0	0
chr1_161173605_161174049_-	ENSG00000158850.14	B4GALT3	chr1	161173605	161174049	-	ENST00000319769.9	6	5	0	0	0	0	0	0	0	0	0	0	0	0	0	0	0	0	0	0	0	0	0	0	0	0	0	0	0	0	0	0	0	0	0	0	0	0	0	0	0	0
chr1_93674614_93706142_-	ENSG00000137936.16	BCAR3	chr1	93674614	93706142	-	ENST00000370244.5	4	3	0	0	0	0	0	0	0	0	0	0	0	0	0	0	0	0.291251	0.263939	0	0	0	0	0	0.331496	0	0	0	0	0	0	0	0	0	0	0.377018	0	0	0	0.183442	0	0
chr1_93674614_93674941_-	ENSG00000137936.16	BCAR3	chr1	93674614	93674941	-	ENST00000370244.5	4	4	0	0	0	0	0	4.61106	0.216125	0	0.548928	0.547384	0.974356	1.75767	0	0.504939	0	1.63158	0.70762	1.00638	1.19845	0	1.428	0	0.662992	0	0	0.468839	0.993664	0	1.61853	0.280616	0	0	0.269653	3.05347	0.527512	0	0.447303	0	2.81506	2.28507
chr1_93642304_93674941_-	ENSG00000137936.16	BCAR3	chr1	93642304	93674941	-	ENST00000370244.5	5	4	0	0	0	0	0	1.97656	0	0	0.281873	0	0	0.481881	0	0	0	7.14205	0.627556	0.84403	0.454952	0.252769	0.262044	0	0.331496	0.399049	0	1.37016	0.298068	0	0.297656	0.280616	0	0.298654	0	2.52454	0	0.432068	0.740046	0.16834	4.94174	0
chr1_93588977_93592393_-	ENSG00000137936.16	BCAR3	chr1	93588977	93592393	-	ENST00000370244.5	7	6	0	0	0.406021	0	0	0.692129	0	0.553919	0	0	0	0	0	0.746836	0	0.664375	0.263939	0.292181	0.291262	0	0.262044	0	0.331496	0.292128	0	0	0	0	0	0	0	0	0	0.340425	0.810329	0	0	0	0.703765	0
chr1_93588977_93589419_-	ENSG00000137936.16	BCAR3	chr1	93588977	93589419	-	ENST00000370244.5	7	7	0	0	0	0	0	0	0	0.414318	0	0	0	0	0	0	0	0	0	0	0	0	0	0	0	0	0	0	0	0	0	0	0	0	0	0	0	0	0	0	0	0
chr1_93582301_93592393_-	ENSG00000137936.16	BCAR3	chr1	93582301	93592393	-	ENST00000370244.5	9	6	0	0	0	0	0	0.217621	0.320729	0	0	0	0.251606	0	0	0	0	0	0	0	0	0	0	0	0.60789	0	0	0	0	0	0	0	0.547682	0	0	0	0	0	0	0.366884	0	0
chr1_93582301_93589419_-	ENSG00000137936.16	BCAR3	chr1	93582301	93589419	-	ENST00000370244.5	9	7	0	0	0	0	0.311608	0	0	0	0	0	0	0	0	0	0	0	0	0	0	0	0	0	0	0	0	0	0	0	0	0	0	0	0	0	0	0	0	0	0	0
chr1_93582301_93584121_-	ENSG00000137936.16	BCAR3	chr1	93582301	93584121	-	ENST00000370244.5	9	8	0	0.65048	0	0	0	2.32577	0	0	0.53411	0.581	0.251606	0.24094	0	0	0.558285	0	1.05576	0	1.42728	0.252769	0.469438	0	0	1.19715	0	0	1.09297	0	0	0.750738	0.279556	0	0.610937	0.565528	1.58995	0.4432	0	0	0	0.506118
chr1_93582301_93582953_-	ENSG00000137936.16	BCAR3	chr1	93582301	93582953	-	ENST00000370244.5	9	9	0	0	0	0	0	0.217621	0	0	0	0	0	0	0	0	0	0	0	0	0	0	0	0	0	0	0	0	0	0	0	0	0	0	0	0	0	0	0	0	0	0
chr1_93576014_93584121_-	ENSG00000137936.16	BCAR3	chr1	93576014	93584121	-	ENST00000370244.5	10	8	0	0	0	0	0	0.388474	0	0	0	0	0	0	0	0	0	0	0	0	0	0	0	0	0	0	0	0	0	0	0	0.229511	0	0	0.269653	0	0	0	0	0	0.567498	0
chr1_93571670_93592393_-	ENSG00000137936.16	BCAR3	chr1	93571670	93592393	-	ENST00000370244.5	11	6	0	0	0	0	0	0	0	0	0	0.547384	0	0	0	0	0	0	0	0	0	0	0	0	0	0	0	0	0	0	0	0	0	0	0	0	0	0	0	0	0	0
chr1_93571670_93589419_-	ENSG00000137936.16	BCAR3	chr1	93571670	93589419	-	ENST00000370244.5	11	7	0	0	0	0	0	0	0	0	0	0	0	0	0	0.504939	0	0	0	0	0	0	0	0	0	0	0	0	0	0	0	0	0	0	0	0	0	0	0	0	0	0
chr1_93571670_93584121_-	ENSG00000137936.16	BCAR3	chr1	93571670	93584121	-	ENST00000370244.5	11	8	0	0	0	0	0.448354	1.42352	0	0	0	0	0	0.559888	0	0.186709	0	0.291251	0	0	0.228832	0	0	0	0	0	0	0	0	0	1.0567	0.229511	0	0	0	0	0	0	0	0.16834	0	0
chr1_93571670_93576129_-	ENSG00000137936.16	BCAR3	chr1	93571670	93576129	-	ENST00000370244.5	11	10	0	0.613268	0	0	0	0.731394	1.1603	0	0	0.547384	0.251606	0	0	0.186709	0	0	0	0	0	0	0	0	0	0.292128	0	0	0	0	0	0.561233	0	0	0	0	0	0	0.894606	0	1.79788	0
chr1_93571670_93571841_-	ENSG00000137936.16	BCAR3	chr1	93571670	93571841	-	ENST00000370244.5	11	11	0	0	0	0	0	0	0	0	0	0	0	0	0	0	0	0	0	0	0	0	0	0	0	0	0	0	0	0	0.297656	0	0	0	0	0.261939	0	0.454332	0.292743	0	0	0
chr1_93567740_93589419_-	ENSG00000137936.16	BCAR3	chr1	93567740	93589419	-	ENST00000370244.5	12	7	0	0	0	0	0	0.388474	0	0	0	0	0	0	0	0	0	0	0	0	0	0	0	0	0	0	0	0	0	0	0	0	0	0	0	0	0	0	0	0	0	0
chr1_93567740_93571841_-	ENSG00000137936.16	BCAR3	chr1	93567740	93571841	-	ENST00000370244.5	12	11	0	0	0	0	0	0	0	0	0	0	0	0	0	0	0	0	0.273746	0	0	0	0	0	0	0	0	0	0	0	0	0	0	0	0	0	0	0	0	0	0	0
chr1_93567279_93584121_-	ENSG00000137936.16	BCAR3	chr1	93567279	93584121	-	ENST00000370244.5	13	8	0	0	0	0	0	0	0	0	0	0	0	0	0	0	0	0	0.273746	0	0	0	0	0	0	0	0	0	0	0	0	0	0	0	0	0	0	0	0	0	0	0
chr1_93567279_93576129_-	ENSG00000137936.16	BCAR3	chr1	93567279	93576129	-	ENST00000370244.5	13	10	0	0	0.326655	0.604644	0	0	0	0	0	0	0	0	0	0	0	0.332188	0.35381	0	0	0	0	0.170444	0	0	0	0	0	0	0	0.841849	0	0	0	0	0	0.216034	0	0.550325	0	0
chr1_93567279_93571841_-	ENSG00000137936.16	BCAR3	chr1	93567279	93571841	-	ENST00000370244.5	13	11	0	0	0	0	0	0	0	0	0	0	0	0	0	0	0	0	0.547492	0	0	0	0	0	0	0	0	0	0	0	0	0	0	0	0	0	0	0	0	0	0	0
chr1_93567279_93567851_-	ENSG00000137936.16	BCAR3	chr1	93567279	93567851	-	ENST00000370244.5	13	12	0.263777	1.67067	2.29507	0	0.802374	8.44221	1.52086	1.24295	10.4646	4.06275	5.50983	1.8426	1.25161	2.9533	2.56776	8.12015	11.3958	2.8893	10.4443	1.01045	3.90197	1.60156	2.07941	4.08703	0	0.968959	4.16693	0.800641	5.49676	3.54052	1.11822	0.597308	2.10246	4.36292	5.41708	2.66234	2.42053	1.56036	16.9567	2.18684
chr1_48736239_48742771_-	ENSG00000162373.12	BEND5	chr1	48736239	48742771	-	ENST00000371833.3	5	4	0	0	0	0	0	0	0	0	0	0	0	0	0	0	0	0.582502	0	0	0	0	0	0	0	0	0	0	0	0	0	0	0	0	0	0	0	0	0	0	0	0
chr1_169376540_169376979_+	ENSG00000117475.13	BLZF1	chr1	169376540	169376979	+	ENST00000329281.6	3	3	0	0	0	0	0	0	0.432249	0	0	0	0	0	0	0	0	0	0	0	0	0	0	0	0	0	0	0	0	0	0	0	0	0	0	0	0	0	0	0	0	0
chr1_169376540_169387209_+	ENSG00000117475.13	BLZF1	chr1	169376540	169387209	+	ENST00000329281.6	3	7	0	0	0	0	0	0	0	0	0	0	0	0	0	0.168313	0.316699	0.635017	0	0.876544	0	0	0	0	0	0	0	0	0	0	0	0	0	0	0	0	0	0	0	0.50502	1.03257	0
chr1_169380481_169382281_+	ENSG00000117475.13	BLZF1	chr1	169380481	169382281	+	ENST00000329281.6	5	6	0	0	0	0	0	0	0	0	0	0	0	0	0	0	0	0.291251	0	0	0	0	0	0	0	0	0	0	0	0	0	0	0	0	0	0	0	0	0	0	0	0
chr1_169380481_169387209_+	ENSG00000117475.13	BLZF1	chr1	169380481	169387209	+	ENST00000329281.6	5	7	0	0	0	0	0	0	0	0	0	0	0	0	0	0	0	0	0	0	0	0	0	0.187335	0	0	0	0	0	0	0	0	0.547682	0	0	0	0	0	0	0	0	0
chr1_39521376_39523117_+	ENSG00000183682.7	BMP8A	chr1	39521376	39523117	+	ENST00000331593.5	4	6	0	0	0	0	0	0	0	0	0	0	0	0	0	0	0	0	0	0	0	0	0	0	0	0	0	0	0	0	0	0	0	0	0	0.261939	0	0	0	0	0	0
chr1_39763092_39764817_-	ENSG00000116985.11	BMP8B	chr1	39763092	39764817	-	ENST00000372827.7	6	4	0	0.687692	0	0	0	0	0	0	0	0	0	0	0	0	0	0	0	0	0	0	0	0.187335	0	0	0	0.322986	0.297039	0.26688	0	0	0	0	0	0	0	0	0	0.550325	0	0
chr1_151038504_151039026_+	ENSG00000163141.18	BNIPL	chr1	151038504	151039026	+	ENST00000368931.7	3	4	0	0	0	0	0	0	0	0	0	0	0	0	0	0	0	0	0	0	0.457664	0	0	0	0	0	0	0	0	0	0	0	0	0	0	0	0	0	0	0	0	0
chr1_151042956_151043727_+	ENSG00000163141.18	BNIPL	chr1	151042956	151043727	+	ENST00000368931.7	5	7	0	0	0	0	0	0	0	0	0	0	0	0	0	0	0	0	0	0	0.454952	0	0	0	0	0	0	0	0	0	0	0	0	0	0	0	0	0	0	0	0	0
chr1_151045797_151046165_+	ENSG00000163141.18	BNIPL	chr1	151045797	151046165	+	ENST00000368931.7	8	9	0	0	0	0	0	0	0	0	0	0	0	0	0	0	0	0	0	0	0	0	0.262044	0	0	0	0	0	0	0	0	0	0	0	0	0	0	0	0	0	0	0
chr1_220072850_220074071_-	ENSG00000162813.17	BPNT1	chr1	220072850	220074071	-	ENST00000354807.7	4	3	0	0	0	0	0.401187	0	0	0	0	0	0	0	0	0	0	0	0	0	0	0	0	0	0	0	0	0	0	0	0	0	0	0	0	0	0	0	0	0	0	0
chr1_220069384_220072957_-	ENSG00000162813.17	BPNT1	chr1	220069384	220072957	-	ENST00000354807.7	5	4	0	0	0	0	0	0	0	0	0	0	0	0	0	0	0	0	0	0	0	0	0	0	0	0	0	0	0	0	0	0.250246	0	0	0	0	0	0	0	0	0	0
chr1_220067302_220079854_-	ENSG00000162813.17	BPNT1	chr1	220067302	220079854	-	ENST00000354807.7	6	2	0	0	0	0	0	0	0	0	0	0	0	0	0	0	0	0	0	0	0	0	0	0	0	0	0	0	0	0	0	0	0	0	0	0	0	0	0	0	0	0
chr1_220062757_220089951_-	ENSG00000162813.17	BPNT1	chr1	220062757	220089951	-	ENST00000469520.6	8	2	0	0	0	0	0	0	0	0	0	0	0	0	0	0	0	0	0	0	0	0	0	0	0	0	0	0	0	0	0	0	0	0	0	0	0	0	0	0	0	0
chr1_91962718_91964764_+	ENSG00000137948.18	BRDT	chr1	91962718	91964764	+	ENST00000362005.7	3	4	0	0	0	0	0	0	0	0	0.53411	0	0	0	0	0	0	0	0	0	0	0	0	0	0	0	0	0.468839	0	0	0	0	0	0	0	0	0.257402	0	0	0	0	0
chr1_91962718_91968260_+	ENSG00000137948.18	BRDT	chr1	91962718	91968260	+	ENST00000362005.7	3	5	0	0	0	0	0	0	0	0	0.594723	0	0	0	0	0	0	0	0	0	0	0	0	0	0	0	0	0	0	0	0	0	0	0	0	0	0	0	0	0	0	0
chr1_91962718_91977393_+	ENSG00000137948.18	BRDT	chr1	91962718	91977393	+	ENST00000362005.7	3	7	0	0	0	0	0	0	0	0	0	0	0	0	0	0	0	0	0	0	0	0	0	0	0	0	0	0	0	0	0	0	0	0	0	0	0.257402	0	0	0	0	0
chr1_91962718_91978296_+	ENSG00000137948.18	BRDT	chr1	91962718	91978296	+	ENST00000362005.7	3	8	0	0	0	0	0	0	0	0	0	0	0	0	0	0	0	0	0	0	0	0	0	0	0	0	0	0	0	0	0	0	0	0	0	0	0.239396	0	0	0	0	0
chr1_91962718_91981755_+	ENSG00000137948.18	BRDT	chr1	91962718	91981755	+	ENST00000362005.7	3	13	0	0	0	0	0	0	0	0	0.267055	0	0	0	0	0	0	0	0	0	0	0	0	0	0	0	0	0.645973	0	0	0	0	0	0	0	0	0.478793	0	0	0	0	0
chr1_91962718_92005299_+	ENSG00000137948.18	BRDT	chr1	91962718	92005299	+	ENST00000362005.7	3	19	0	0	0	0	0	0	0	0	0	0	0	0	0	0	0	0	0	0	0	0	0	0	0	0	0	0	0	0	0	0	0	0	0	0	0.239396	0	0	0	0	0.728946
chr1_91978168_91981381_+	ENSG00000137948.18	BRDT	chr1	91978168	91981381	+	ENST00000362005.7	8	12	0	0	0	0	0	0	0	0	0	0	0	0	0	0	0	0	0	0	0	0	0	0	0	0	0	0	0	0	0	0	0	0	0	0	0.239396	0	0	0	0	0
chr1_91978168_91981755_+	ENSG00000137948.18	BRDT	chr1	91978168	91981755	+	ENST00000362005.7	8	13	0	0	0	0	0	0	0	0	0.281873	0	0	0	0	0	0	0	0	0	0	0	0	0	0	0	0	0	0	0	0	0	0	0	0	0	0	0	0	0	0	0
chr1_91978168_91994254_+	ENSG00000137948.18	BRDT	chr1	91978168	91994254	+	ENST00000362005.7	8	16	0	0	0	0	0	0	0	0	0	0	0	0	0	0.186709	0	0	0	0	0	0	0	0	0	0	0	0	0	0	0	0	0	0	0	0	0	0	0	0	0	0.364473
chr1_91992264_92002149_+	ENSG00000137948.18	BRDT	chr1	91992264	92002149	+	ENST00000362005.7	15	17	0	0	0	0	0	0	0	0	0	0	0	0	0	0	0	0	0	0	0	0	0	0	0	0	0	0.322986	0	0	0	0	0	0	0	0	0	0	0	0	0	0
chr1_190264865_190281750_-	ENSG00000162670.10	BRINP3	chr1	190264865	190281750	-	ENST00000367462.4	4	3	0	0	0	0	0	0	0	0	0	0	0	0	0	0	0	0	0	0	0.22612	0	0	0	0	0	0	0	0	0	0	0	0	0	0	0	0	1.85282	0	0	0	0
chr1_190264865_190265055_-	ENSG00000162670.10	BRINP3	chr1	190264865	190265055	-	ENST00000367462.4	4	4	0	0	0	0	0	0	0	0	0	0	0	0	0	0	0	0	0	0	0	0	0	0	0	0	0	0	0	0	0	0	0	0	0	0	0	0.216034	0	0	0	0
chr1_190234372_190281750_-	ENSG00000162670.10	BRINP3	chr1	190234372	190281750	-	ENST00000367462.4	5	3	0	0	0	0	0	0	0	0	0	0	0	0	0	0	0	0	0	0	0	0	0	0	0	0	0	0	0	0	0.649888	0	0	0	0	0	0	0	0	0	0	0
chr1_190234372_190265055_-	ENSG00000162670.10	BRINP3	chr1	190234372	190265055	-	ENST00000367462.4	5	4	0	0	0	0	0	0	0	0	0	0	0	0	0	0	0	0	0	0	0	0	0	0	0	0	0	0	0	0	0	0	0	0	0	0	0	0.227166	0	0	0	0
chr1_190226082_190281750_-	ENSG00000162670.10	BRINP3	chr1	190226082	190281750	-	ENST00000367462.4	6	3	0.270788	0	0	0	0	0	0	0	0	0	0	0	0	0	0	0	0	0	0.686496	0	0	0	0	0	0	0	0	0	0.352232	0	0	0	0	0	0	0.216034	0	0	0	0
chr1_190226082_190265055_-	ENSG00000162670.10	BRINP3	chr1	190226082	190265055	-	ENST00000367462.4	6	4	0	0	0	0	0	0	0	0	0	0	0	0	0	0	0	0	0	0	0	0	0	0	0	0	0	0	0	0	0	0	0	0	0	0	0	0	0	0	0	0
chr1_190160668_190454940_-	ENSG00000162670.10	BRINP3	chr1	190160668	190454940	-	ENST00000367462.4	7	2	0	0	0	0	0	0	0	0	0	0	0	0	0	0	0	0	0	0	0	0	0	0	0	0	0	0	0	0	0	0	0	0	0	0	0	0	0	0	0	0
chr1_222715684_222715800_+	ENSG00000162819.11	BROX	chr1	222715684	222715800	+	ENST00000340934.9	2	2	0	0	0	0	0	0	0	0	0	0	0	0	0	0	0	0	0	0	0	0	0	0	0	0	0	0	0	0	0	0	0	0	0	0	0	0	0	0	0	0
chr1_222715684_222719359_+	ENSG00000162819.11	BROX	chr1	222715684	222719359	+	ENST00000340934.9	2	4	0	0	0	0	0	0	0	0	0	0	0	0	0	0	0	0	0	0	0	0	0	0	0	0	0	0	0	0	0	0	0	0	0	0	0	0	0	0	0	0
chr1_222715684_222722514_+	ENSG00000162819.11	BROX	chr1	222715684	222722514	+	ENST00000340934.9	2	5	0	0	0	0	0	0	0	0	0	0	0	0	0	0	0	1.81697	0	0	0	0	0.262044	0	0	0	0	0	0	0	0.595312	0.280616	0	0	0.721503	0	0	0	0	0	0	0
chr1_222715684_222724164_+	ENSG00000162819.11	BROX	chr1	222715684	222724164	+	ENST00000340934.9	2	6	0	0	0	0	0	0	0	0	0.281873	0	0	0	0	0	0	0	0	0	0	0	0	0.374669	0	0	0	0	0	0	0	0	0	0	0	0	0	0	0	0	0	0
chr1_222715684_222725555_+	ENSG00000162819.11	BROX	chr1	222715684	222725555	+	ENST00000340934.9	2	7	0.241694	0	0	0	0	0	0	0.276959	0	0.581	0	0	0	0	0.559125	0	0	0.620888	0	0.228857	0	0.187335	0	0	0.583509	0	0	0	0	0	0	0	0	0	0	0	0	0	0	0.364473
chr1_222715684_222730177_+	ENSG00000162819.11	BROX	chr1	222715684	222730177	+	ENST00000340934.9	2	11	0	0.306634	0.988682	0	0	0	0	0	0	0	0	0	0.691854	0	0	0	0	0	0	0	0	0	0	0	0	0	0	0	0	0	0	0	0	0	0	0	0	0.183442	0	0
chr1_222718925_222725555_+	ENSG00000162819.11	BROX	chr1	222718925	222725555	+	ENST00000340934.9	3	7	0	0	0.494341	0	0	0	0	0	0	0	0	0	0	0	0	0	0	0	0	0	0	0	0	0	0	0	0	0	0	0	0	0	0	0	0	0	0	0	0	0
chr1_222719263_222730177_+	ENSG00000162819.11	BROX	chr1	222719263	222730177	+	ENST00000340934.9	4	11	0	0	0	0	0	0	0	0	0	0	0	0	0	0	0	0	0	0	0	0	0	0	0	0	0	0	0	0	0.297656	0	0	0	0	0	0	0	0	0	0	0
chr1_222724092_222725555_+	ENSG00000162819.11	BROX	chr1	222724092	222725555	+	ENST00000340934.9	6	7	1.08315	1.32683	0	1.88239	1.20356	1.55511	1.18523	0.873158	2.21187	0	0.503213	1.60021	1.03778	0.187263	0.633398	0	1.14563	1.85041	1.49785	0.686572	0	0.715558	1.79614	2.52265	0.692705	0	3.17651	0.706337	3.02746	1.83173	0.547682	0.551589	2.18513	1.69177	1.28912	0.659234	0.447303	0.8417	5.98969	0
chr1_222724092_222730177_+	ENSG00000162819.11	BROX	chr1	222724092	222730177	+	ENST00000340934.9	6	11	0.270788	0.406923	0.326655	0	0.535785	0	0	0.276959	0.281873	0.547384	0	0	0.691854	0.186709	0	0	0	0.876544	0.452239	0	0	0.936674	1.51975	0	0	0	0	0	0.595312	0	0	0	1.22187	0	0.514804	0.216034	0.267418	0	0.719152	0
chr1_222725450_222730177_+	ENSG00000162819.11	BROX	chr1	222725450	222730177	+	ENST00000340934.9	7	11	0	0	0	0	0.311608	0	0	0	0	0	0	0	0	0	0	0	0	0	0.452239	0	0	0	0	0	0	0.468839	0	0	0	0	0	0	0.539305	0	0	0	0	0	0.359576	0
chr1_222715684_222718094_+	ENSG00000162819.11	BROX	chr1	222715684	222718094	+	ENST00000469236.5	3	4	0	0	0	0	0	0	0	0	0	0	0	0	0	0	0	0	0	0	0	0	0	0	0	0	0	0	0	0.3276	0	0	0	0	0	0	0	0	0	0.16834	0	0
chr1_222715145_222725555_+	ENSG00000162819.11	BROX	chr1	222715145	222725555	+	ENST00000489191.1	2	6	0	0	0	0	0	0.256886	0	0	0	0	0	0	1.03778	0	0	0	0	0	0	0	0.262044	0	0	0	0	0.322986	0	0	0	0	0	0	0	0	0	0	0	0	0	0
chr1_32386779_32386895_-	ENSG00000160058.18	BSDC1	chr1	32386779	32386895	-	ENST00000444377.5	3	3	0	0	0	0	0	0	0	0	0	0	0.286956	0	0	0	0	0	0	0	0	0	0	0	0	0	0	0	0	0	0	0	0	0	0	0	0	0	0	0	0	0
chr1_32383830_32386895_-	ENSG00000160058.18	BSDC1	chr1	32383830	32386895	-	ENST00000444377.5	4	3	0	0	0	0.604644	0	0	0	0	0	0	0	0	0	0	0	0	0	0	0	0	0	0	0	0	0	0	0	0	0	0	0	0	0	0.261939	0	0	0	0	0	0
chr1_32381214_32386895_-	ENSG00000160058.18	BSDC1	chr1	32381214	32386895	-	ENST00000444377.5	5	3	0	0	0	0	0	0	0	0	0	0	0	0	0	0	0	0	0	0	0	0	0	0	0	0	0	0	0	0	0	0	0	0	0	0.188509	0	0	0	0	0	0
chr1_32376262_32386895_-	ENSG00000160058.18	BSDC1	chr1	32376262	32386895	-	ENST00000444377.5	9	3	0	0	0	0	0	0	0	0	0	0	0	0	0	0	0	0	0	0	0.228832	0	0	0	0	0	0	0	0	0	0	0	0	0	0	0	0	0.227166	0	0	0	0
chr1_32368447_32386895_-	ENSG00000160058.18	BSDC1	chr1	32368447	32386895	-	ENST00000444377.5	11	3	0	0	0	0	0	0	0	0	0	0	0	0	0	0	0	0	0	0	0	0	0	0	0	0	0	0	0	0	0	0	0	0	0	0	0	0	0	0.16834	0	0
chr1_32368447_32381268_-	ENSG00000160058.18	BSDC1	chr1	32368447	32381268	-	ENST00000444377.5	11	5	0	0	0	0.673104	0	0	0	0	0	0	0	0	0	0	0	0	0	0	0	0	0	0	0	0	0	0	0	0	0	0	0	0	0	0	0	0.454332	0	0	0	0
chr1_32368447_32376741_-	ENSG00000160058.18	BSDC1	chr1	32368447	32376741	-	ENST00000444377.5	11	9	0	0	0	0	0	0	0	0	0	0.581	0	0	0	0	0	0	0	0	0	0	0	0	0	0	0	0	0	0	0	0	0	0	0	0	0	0	0	0	0	0
chr1_92088698_92108001_+	ENSG00000189195.12	BTBD8	chr1	92088698	92108001	+	ENST00000636805.1	2	4	0	0	0	0	0.224177	0	0	0	0	0	0	0	0	0	0	0	0	0	0	0	0	0	0	0	0	0	0	0	0	0	0	0	0	0	0	0	0	0	0	0
chr1_92088698_92129776_+	ENSG00000189195.12	BTBD8	chr1	92088698	92129776	+	ENST00000636805.1	2	5	0	0	0	0	0.224177	0	0	0	0	0	0	0	0	0	0	0	0	0	0	0	0.741326	0	0	0.424084	0	0	0	0	0	0	0	0	0.225925	0.377018	0	0	0	0	0	0
chr1_92088698_92147786_+	ENSG00000189195.12	BTBD8	chr1	92088698	92147786	+	ENST00000636805.1	2	9	0	0	0	0	0	0	0	0	0	0	0	0	0	0	0	0	0	0	0	0	0	0	0	0	0	0	0	0	0	0	0	0	0	0	0	0	0	0	0	0
chr1_92107884_92129776_+	ENSG00000189195.12	BTBD8	chr1	92107884	92129776	+	ENST00000636805.1	4	5	0	0	0	0	0	0	0	0	0	0	0	0	0	0	0	0	0	0	0	0	0.262044	0	0.276394	0	0	0	0	0	0	0	0	0	0	0	0	0	0	0	0	0
chr1_92107884_92139430_+	ENSG00000189195.12	BTBD8	chr1	92107884	92139430	+	ENST00000636805.1	4	6	0	0	0	0	0	0	0	0	0	0	0	0	0	0	0	0	0	0	0	0	0	0	0	0	0	0	0	0.353169	0	0	0	0	0	0	0	0	0	0	0	0
chr1_92107884_92147786_+	ENSG00000189195.12	BTBD8	chr1	92107884	92147786	+	ENST00000636805.1	4	9	0	0	0	0	0	0	0	0	0	0	0	0	0	0	0	0	0.263939	0	0	0	0	0	0	0	0	0	0	0	0.297656	0	0	0	0	0	0	0	0	0	0	0
chr1_92139350_92147786_+	ENSG00000189195.12	BTBD8	chr1	92139350	92147786	+	ENST00000636805.1	6	9	0	0	0	0	0	0	0	0	0	0	0	0	0	0	0	0	0	0.620888	0.22612	0	0	0	0	0	0	0	0	0	0	0	0	0	0	0	0	0	0	0	0	0
chr1_92176829_92178451_+	ENSG00000189195.12	BTBD8	chr1	92176829	92178451	+	ENST00000636805.1	14	16	0	0	0	0	0	0	0	0	0	0	0	0	0	0	0	0	0	0	0	0	0	0	0	0	0	0	0	0	0	0	0	0	0	0	0	0	0	0	0	0
chr1_92176829_92182595_+	ENSG00000189195.12	BTBD8	chr1	92176829	92182595	+	ENST00000636805.1	14	17	0	0	0	0	0	0	0	0	0	0	0	0	0	0	0	0	0.263939	0	0	0	0	0	0	0	0	0	0	0	0	0	0	0	0	0	0	0	0	0	0	0
chr1_92177811_92182595_+	ENSG00000189195.12	BTBD8	chr1	92177811	92182595	+	ENST00000636805.1	15	17	0	0	0	0	0.224177	0	0	0.22942	0	0	0	0	0.620102	0.186709	0.558285	0	0	0	0	0	0.479282	0	0	0	0	0	0	0	0.859493	0	0	0.252936	0	0	0	0	0	0	0.359576	0
chr1_52059835_52064938_+	ENSG00000134717.17	BTF3L4	chr1	52059835	52064938	+	ENST00000477828.6	2	4	0	0	0	0	0	0	0	0	0	0	0	0	0	0	0	0	0	0	0	0	0	0	0	0	0	0	0	0	0	0	0	0	0	0	0	0	0	0.338014	0	0
chr1_52059835_52086171_+	ENSG00000134717.17	BTF3L4	chr1	52059835	52086171	+	ENST00000477828.6	2	6	0	0	0	0	0	0	0	0	0	0	0	0	0	0	0	0	0	0	0	0	0	0	0	0	0	0	0	0	0	0	0	0	0	0	0	0	0	0	0.344189	0
chr1_52064825_52064938_+	ENSG00000134717.17	BTF3L4	chr1	52064825	52064938	+	ENST00000477828.6	4	4	0	0	0	0	0	0	0	0	0	0	0	0	0.571154	0	0	0	0	0	0	0	0	0	0	0	0	0	0	0	0	0	0	0	0	0	0	0	0	0	0	0
chr1_244477541_244499079_+	ENSG00000179397.17	C1orf101	chr1	244477541	244499079	+	ENST00000366534.8	3	7	0.263777	0	0	0	0	0	0	0	0	0	0	0	0	0	0	0	0	0	0	0	0	0.340888	0	0	0	0	0	0	0	0	0	0	0	0	0	0	0	0	0	0
chr1_244490447_244518698_+	ENSG00000179397.17	C1orf101	chr1	244490447	244518698	+	ENST00000366534.8	6	8	0	0	0	0	0	0	0	0	0	0	0	0	0	0	0	0	0	0	0	0	0	0	0	0	0	0	0	0	0	0	0	0	0	0	0	0.227166	0	0	0	0
chr1_244518592_244552814_+	ENSG00000179397.17	C1orf101	chr1	244518592	244552814	+	ENST00000366534.8	8	9	0	0	0	0	0	0	0	0	0	0	0	0	0	0	0	0	0	0	0	0	0	0	0	0	0	0	0	0	0	0	0	0	0.269653	0	0	0	0	0	0	0
chr1_244518592_244572772_+	ENSG00000179397.17	C1orf101	chr1	244518592	244572772	+	ENST00000366534.8	8	11	0	0	0	0	0	0	0	0	0	0	0	0	0	0	0	0	0	0	0	0	0	0.187335	0	0	0	0	0	0	0	0	0	0	0	0.340425	0	0	0	0	0	0
chr1_244552322_244552814_+	ENSG00000179397.17	C1orf101	chr1	244552322	244552814	+	ENST00000366534.8	9	9	0	0	0	0.604644	0	0	0	0	0	0	0	0	0	0	0	0.291251	0	0	0	0	0	0	0	0	0	0	0.596137	0	0	0	0	0	0	0	0	0	0	0	0	0
chr1_244552322_244561145_+	ENSG00000179397.17	C1orf101	chr1	244552322	244561145	+	ENST00000366534.8	9	10	0	0	0	0	0	0	0	0	0.801166	0.547384	0	0	0	0	0	0.967204	0	0	0	0	0	0.246697	1.16068	0	0.692705	0	0.297039	0	0.297656	0.750738	0	0	0	0	0	0.227166	0	0.33668	1.135	0
chr1_244552322_244572772_+	ENSG00000179397.17	C1orf101	chr1	244552322	244572772	+	ENST00000366534.8	9	11	0	0	0	0	0	0	0	0	0	0	0	0	0	0	0	0	0	0	0	0	0	0	0	0	0	0	0	0	0	0	0	0	0	0	0	0	0	0	0	0
chr1_244552322_244581854_+	ENSG00000179397.17	C1orf101	chr1	244552322	244581854	+	ENST00000366534.8	9	12	0	0	0	0	0	0	0	0	0	0	0	0	0	0	0	0	0	0	0	0	0	0	0	0	0	0	0	0	0	0	0	0	0	0	0	0.227166	0	0	0	0
chr1_244560668_244561145_+	ENSG00000179397.17	C1orf101	chr1	244560668	244561145	+	ENST00000366534.8	10	10	0	0	0	0	0	0	0	0	0	0	0	0	0	0	0	0	0	0	0	0	0	0	0	0	0	0	0	0	0.352232	0	0	0	0	0	0	0	0	0	0	0
chr1_244560668_244572772_+	ENSG00000179397.17	C1orf101	chr1	244560668	244572772	+	ENST00000366534.8	10	11	0	0	0	0	0	0	0	0	0	0	0	0	0	0	0	0	0	0	0	0	0	0	0	0	0	0	0	0	0	0	0	0	0	0	0	0.454332	0	0	0	0
chr1_244560668_244593578_+	ENSG00000179397.17	C1orf101	chr1	244560668	244593578	+	ENST00000366534.8	10	17	0	0	0	0	0	0	0	0	0	0	0	0	0	0	0	0	0	0	0	0	0	0.340888	0	0	0	0	0	0	0	0	0	0	0	0	0	0	0	0	0	0
chr1_244572330_244593578_+	ENSG00000179397.17	C1orf101	chr1	244572330	244593578	+	ENST00000366534.8	11	17	0	0	0	0	0	0	0	0	0	0	0	0	0	0	0	0	0	0	0	0	0	0	0	0	0	0	0	0	0	0	0	0	0	0	0	0	0	0.16834	0	0
chr1_244572330_244610326_+	ENSG00000179397.17	C1orf101	chr1	244572330	244610326	+	ENST00000366534.8	11	19	0	0	0	0	0	0	0	0	0	0	0	0	0	0	0	0	0	0	0	0	0	0	0	0	0	0.468839	0	0	0	0	0	0	0	0	0	0	0	0	0	0
chr1_200898307_200898455_+	ENSG00000163362.10	C1orf106	chr1	200898307	200898455	+	ENST00000367342.8	2	2	0	0	0	0	0	0	0	0	0	0	0	0	0	0.186709	0	0	0	0	0	0	0	0.246697	0	0	0	0	0	0	0	0	0	0	0	0	0	0	0	0	0	0
chr1_200898307_200900220_+	ENSG00000163362.10	C1orf106	chr1	200898307	200900220	+	ENST00000367342.8	2	4	0	0	0	0	0	0	0	0	0	0	0	0	0	0	0	0	0	0	0	0.252769	0	0.170444	0	0	0	0	0	0	0	0	0	0	0	0	0	0	0	0	0	0
chr1_200898307_200901159_+	ENSG00000163362.10	C1orf106	chr1	200898307	200901159	+	ENST00000367342.8	2	5	0	0	0	0	0	0	0	0	0	0	0	0	0	0	0	0	0	0	0	0	0	0	0	0	0	0	0	0	0	0	0	0	0	0	0	0	0	0	0	0
chr1_200898392_200900220_+	ENSG00000163362.10	C1orf106	chr1	200898392	200900220	+	ENST00000451872.6	2	4	0	0	0	0	0	0	0	0	0	0	0	0	0	0	0	0	0	0	0	0	0	0.374669	0	0	0	0	0	0	0	0	0	0	0	0	0	0	0	0	0	0
chr1_169798857_169850345_+	ENSG00000000460.16	C1orf112	chr1	169798857	169850345	+	ENST00000286031.10	2	22	0	0	0	0	0	0.770659	0	0	0	0	0	0	0	0.168313	0	0	0	0	0	0	0	0	0	0	0	0	0	0	0	0	0	0	0	0	0	0	0	0	0	0
chr1_169804075_169837112_+	ENSG00000000460.16	C1orf112	chr1	169804075	169837112	+	ENST00000286031.10	6	17	0	0	0	0	0	0	0	0	0	0.547384	0	0	0	0	0	0	0	0	0	0	0	0	0	0	0	0	0	0	0	0	0	0	0	0	0	0	0	0	0	0
chr1_169795829_169851936_+	ENSG00000000460.16	C1orf112	chr1	169795829	169851936	+	ENST00000359326.8	2	24	0	0	0	0	0	0	0	0	0	0	0	0	0	0	0	0	0	0	0	0	0	0	0	0	0	0	0	0	0	0	0	0	0	0	0.257402	0	0	0	0	0
chr1_169798857_169800971_+	ENSG00000000460.16	C1orf112	chr1	169798857	169800971	+	ENST00000498289.5	6	7	0	0	0	0.604644	0	0	0	0	0	0	0.251606	0	0	0	0	0	0	0	0	0	0	0	0.310838	0	0	0	0	0	0	0	0	0	0	0	0.239396	0	0	0	0	0
chr1_169798857_169804240_+	ENSG00000000460.16	C1orf112	chr1	169798857	169804240	+	ENST00000498289.5	6	10	0	0	0	0.673104	0	0.256886	0	0	0	0	0	0	0	0	0	0	0	0	0	0.457715	0	0	0	0	0	0	0	0	0	0	0	0	0	0	0	0	0	0	0	1.77895
chr1_169798857_169806088_+	ENSG00000000460.16	C1orf112	chr1	169798857	169806088	+	ENST00000498289.5	6	11	0	0	0	0	0	0.217621	0	0	0	0	0	0	0	0	0	0	0	0	0	0	0	0	0	0	0	0	0.496832	0	0	0	0	0	0	0	0	0	0	0	0.344189	0
chr1_169798857_169807929_+	ENSG00000000460.16	C1orf112	chr1	169798857	169807929	+	ENST00000498289.5	6	12	0	0	0	0	0	0	0	0	0.281873	0	0	0	0	0	0	0	0	0	0	0	0	0	0	0	0	0	0	0	0	0	0	0	0	0	0.257402	0	0	0	0	0
chr1_169798857_169821759_+	ENSG00000000460.16	C1orf112	chr1	169798857	169821759	+	ENST00000498289.5	6	13	0	0	0	0	0	0	0	0	0	0	0	0	0	0	0	0	0	0	0	0	0	0	0	0	0	0	0	0	0	0	0	0	0	0	0	0	0	0	0	0
chr1_169798857_169823472_+	ENSG00000000460.16	C1orf112	chr1	169798857	169823472	+	ENST00000498289.5	6	14	0	0	0	0	0	0	0	0	0	0	0	0	0	0	0.559125	0	0	0.292181	0	0	0	0	0	0	0	0	0	0	0	0	0	0.429836	0	0	0	0	0	0	0.359576	0
chr1_169798857_169827199_+	ENSG00000000460.16	C1orf112	chr1	169798857	169827199	+	ENST00000498289.5	6	15	0	0	0	0	0	0	0	0	0	0	0	0	0	0	0	0	0	0	0	0	0	0.246697	0.552789	0	0	0	0	0.3276	0	0	0	0	0	0	0	0	0	0	0.344189	0
chr1_169798857_169827840_+	ENSG00000000460.16	C1orf112	chr1	169798857	169827840	+	ENST00000498289.5	6	16	0	0	0	0	0	0	0	0	0	0	0	0	0	0	0	0	0	0	0	0	0.479282	0	0	0	0	0	0	0	0	0	0	0	0	0	0	0	0	0	0	0
chr1_169798857_169830747_+	ENSG00000000460.16	C1orf112	chr1	169798857	169830747	+	ENST00000498289.5	6	19	0	0	0	0	0	0	0.432249	0	0	0	0	0	0	0	0	0	0	0	0	0	0	0	0	0	0	0	0	0	0	0	0	0	0	0	0	0	0	0	0	0
chr1_169798857_169832506_+	ENSG00000000460.16	C1orf112	chr1	169798857	169832506	+	ENST00000498289.5	6	20	0	0	0.494341	0	0	0	0	0	0	0	0	0	0	0	0	0	0	0	0	0	0	0	0	0	0	0	0	0	0	0	0	0	0	0	0	0	0	0	0	0
chr1_169798857_169837112_+	ENSG00000000460.16	C1orf112	chr1	169798857	169837112	+	ENST00000498289.5	6	21	0	0	0	0	0	0	0	0	0	0	0	0	0	0	0	0	0	0	0	0.228857	0	0	0	0	0	0	0	0	0	0	0	0	0	0	0	0	0	0	0	0
chr1_169798857_169847803_+	ENSG00000000460.16	C1orf112	chr1	169798857	169847803	+	ENST00000498289.5	6	24	0	0	0	0	0	0	0	0	0	0	0	0	0.345927	0	0	0	0	0	0	0	0	0	0	0	0	0	0	0	0	0	0	0	0	0	0	0	0	0	0	0
chr1_169798857_169851936_+	ENSG00000000460.16	C1orf112	chr1	169798857	169851936	+	ENST00000498289.5	6	28	0	0	0	0	0	0	0	0	0	0	0	0	0	0	0	0	0	0	0	0	0	0	0	0	0	0	0	0	0	0	0	0	0	0	0	0	0	0	0	0
chr1_169800883_169803309_+	ENSG00000000460.16	C1orf112	chr1	169800883	169803309	+	ENST00000498289.5	7	9	0	0	0	0	0	0	0	0	0	0	0	0	0	0	0	0	0	0	0	0	0	0	0	0	0	0	0	0	0	0	0	0	0	0	0	0	0	0	0	0
chr1_169800883_169804240_+	ENSG00000000460.16	C1orf112	chr1	169800883	169804240	+	ENST00000498289.5	7	10	0	0	0	0	0	0	0	0	0	0.629299	0	0	0	0	0	0	0	0	0	0	0	0	0	0	0	0	0	0	0	0	0	0	0	0	0	0	0	0	0	0
chr1_169800883_169821759_+	ENSG00000000460.16	C1orf112	chr1	169800883	169821759	+	ENST00000498289.5	7	13	0	0	0	0	0	0	0	0	0	0	0	0	0	0	1.11825	0	0	0	0	0	0	0	0	0	0	0	0	0	0	0	0	0	0	0	0	0	0	0	0	0
chr1_169802621_169804240_+	ENSG00000000460.16	C1orf112	chr1	169802621	169804240	+	ENST00000498289.5	8	10	0	0	0	0	0	0	0	0	0	0	0	0	0	0	0	0	0	0	0	0.252769	0	0	0	0	0	0	0	0	0	0	0	0	0	0	0	0	0	0	0	0
chr1_169802621_169806088_+	ENSG00000000460.16	C1orf112	chr1	169802621	169806088	+	ENST00000498289.5	8	11	0.241694	0	0	0	0	0	0	0	0	0	0	0	0	0	0	0	0	0	0	0	0	0	0	0	0	0	0	0	0	0	0	0	0	0	0	0	0	0	0	0
chr1_169802621_169807929_+	ENSG00000000460.16	C1orf112	chr1	169802621	169807929	+	ENST00000498289.5	8	12	0	0	0	0	0	0	0	0	0.53411	0	0	0	0	0	0	0	0.263939	0	0	0	0	0	0	0.292128	0	0.755471	0	0	0.352232	0	0	0.252936	0	0.188509	0.514804	0	0	0	0.344189	0
chr1_169802621_169827840_+	ENSG00000000460.16	C1orf112	chr1	169802621	169827840	+	ENST00000498289.5	8	16	0	0	0	0	0	0	0	0	0	0	0	0	0	0	0	0	0	0	0	0	0	0	0	0	0	0	0	0	0	0	0	0	0	0	0	0	0	0	0	0
chr1_169802621_169837112_+	ENSG00000000460.16	C1orf112	chr1	169802621	169837112	+	ENST00000498289.5	8	21	0	0	0	0	0	0	0	0	0	0	0	0	0	0	0	0	0	0	0	0	0	0	0	0	0	0	0	0	0	0	0	0	0	0	0	0	0	0	0	0
chr1_169802621_169843769_+	ENSG00000000460.16	C1orf112	chr1	169802621	169843769	+	ENST00000498289.5	8	23	0	0	0	0	0	0	0	0	0	0	0	0	0	0	0	0	0	0	0.22612	0	0	0	0	0	0	0.322986	0	0	0	0	0	0	0	0	0	0	0	0	0	0
chr1_169806004_169821759_+	ENSG00000000460.16	C1orf112	chr1	169806004	169821759	+	ENST00000498289.5	11	13	0	0	0	0	0	0	0	0.22942	0	0	0	0	0	0	0	0	0	0	0	0	0	0	0	0	0	0	0	0	0	0	0	0	0	0	0	0	0	0	0	0
chr1_169806004_169827199_+	ENSG00000000460.16	C1orf112	chr1	169806004	169827199	+	ENST00000498289.5	11	15	0	0	0	0	0	0	0	0	0	0	0	0	0	0	0	0	0	0	0	0	0	0	0	0	0	0	0	0	0	0	0	0	0	0	0	0	0	0	0	0
chr1_169807791_169823472_+	ENSG00000000460.16	C1orf112	chr1	169807791	169823472	+	ENST00000498289.5	12	14	0	0	0.326655	0	0	0	0	0	0	0	0	0	0	0	0	0	0	0	0	0	0	0	0	0	0	0	0	0	0	0	0	0	0	0	0	0	0	0	0	0
chr1_169821679_169832506_+	ENSG00000000460.16	C1orf112	chr1	169821679	169832506	+	ENST00000498289.5	13	20	0	0	0	0	0	0.256886	0	0	0	0	0	0	0	0	0	0	0	0	0	0	0	0	0	0	0	0	0	0	0	0	0	0	0	0	0	0	0	0	0	0
chr1_169823408_169827199_+	ENSG00000000460.16	C1orf112	chr1	169823408	169827199	+	ENST00000498289.5	14	15	0	0	0	0	0	0	0	0	0	0	0	0	0	0	0	0	0	0	0	0	0	0	0	0	0	0	0	0	0	0	0	0	0	0	0	0	0	0	0	0
chr1_169827051_169843769_+	ENSG00000000460.16	C1orf112	chr1	169827051	169843769	+	ENST00000498289.5	15	23	0	0	0	0	0	0	0	0	0	0	0	0	0	0	0	0	0	0	0	0	0	0	0	0	0	0	0	0	0	0	0	0	0	0	0	0	0	0	0.344189	0
chr1_169827711_169832506_+	ENSG00000000460.16	C1orf112	chr1	169827711	169832506	+	ENST00000498289.5	16	20	0	0	0	0	0	0	0	0	0	0	0	0	0	0	0	0	0	0	0	0	0.234719	0	0	0	0	0	0	0	0	0	0	0	0	0	0	0	0	0	0	0
chr1_169830259_169851936_+	ENSG00000000460.16	C1orf112	chr1	169830259	169851936	+	ENST00000498289.5	18	28	0	0	0	0	0	0.256886	0	0	0	0	0	0	0	0	0	0	0	0	0	0	0	0	0	0	0	0	0	0	0	0	0	0	0	0	0	0	0	0	0	0
chr1_169830696_169843769_+	ENSG00000000460.16	C1orf112	chr1	169830696	169843769	+	ENST00000498289.5	19	23	0	0	0	0	0	0	0	0	0	0	0	0	0	0.168313	0	0	0	0	0	0	0	0	0	0	0	0	0	0	0	0	0	0	0	0	0	0	0	0	0	0
chr1_169832417_169851936_+	ENSG00000000460.16	C1orf112	chr1	169832417	169851936	+	ENST00000498289.5	20	28	0	0	0	0	0	0	0	0	0	0	0	0	0	0	0	0	0	0	0	0	0	0	0	0	0	0	0	0	0	0	0	0	0	0	0	0	0	0	0	0
chr1_169836927_169843769_+	ENSG00000000460.16	C1orf112	chr1	169836927	169843769	+	ENST00000498289.5	21	23	0	0	0	0	0	0	0	0	0	0	0	0	0	0	0	0	0	0	0	0	0	0	0	0.399049	0	0	0	0	0	0	0	0	0	0	0	0	0	0	0	0
chr1_169836927_169850327_+	ENSG00000000460.16	C1orf112	chr1	169836927	169850327	+	ENST00000498289.5	21	26	0	0	0	0	0	0.256886	0	0	0	0	0	0	0	0	0	0	0.263939	0	0	0	0	0	0	0	0	0	0	0	0	0.561233	0	0	0	0	0.27011	0	0	0	0.344189	0
chr1_207027494_207027679_-	ENSG00000182795.12	C1orf116	chr1	207027494	207027679	-	ENST00000359470.5	2	2	0.527554	1.77096	0	0	14.9089	0.256886	15.0905	6.6743	0.801166	0	0	2.99574	5.02923	3.83279	1.91644	0	0	4.96686	0.517381	2.3364	1.21076	0.562004	0.276394	0	0.692705	1.33381	0.496832	11.4245	0	0.841849	2.7727	0.859673	0.495578	5.75616	4.92239	0	0	1.5919	1.63084	7.21969
chr1_53215991_53220344_-	ENSG00000162384.13	C1orf123	chr1	53215991	53220344	-	ENST00000294360.4	7	2	0	0	0	0	0	0	0	0	0	0	0	0	0	0	0	0	0	0	0	0	0	0	0	0	1.38541	0	0	0	0.352232	0	0	0	0	0	0	0	0	0	0	0
chr1_231238857_231239188_-	ENSG00000143633.12	C1orf131	chr1	231238857	231239188	-	ENST00000366649.6	2	2	0	0	0	0	0	0	0	0	0	0	0	0	0	0	0	0	0	0	0	0.228857	0	0	0	0	0	0	0	0	0	0	0	0	0	0	0	0	0	0	0	0
chr1_231226739_231227068_-	ENSG00000143633.12	C1orf131	chr1	231226739	231227068	-	ENST00000366649.6	5	4	0	0	0	0	0	0	0	0	0	0	0	0	0	0	0	0	0	0	0	0	0	0	0	0	0	0	0	0	0	0.229511	0	0	0	0	0	0	0	0	0	0
chr1_231226391_231227068_-	ENSG00000143633.12	C1orf131	chr1	231226391	231227068	-	ENST00000486384.5	5	3	0	0	0	0	0	0	0.255961	0	0	0	0	0	0	0	0	0	0	0	0	0	0	0	0	0	0	0	0	0	0	0	0	0	0	0	0	0	0	0	0	0
chr1_51112464_51118801_+	ENSG00000204006.8	C1orf185	chr1	51112464	51118801	+	ENST00000371759.6	2	3	0	0	0	0	0	0	0	0	0	0	0	0	0	0	0	0	0	0	0	0	0	0	0	0	0	0	0	0	0	0	0	0	0	0	0	0	0	0	0	0
chr1_206097733_206099798_+	ENSG00000263961.7	C1orf186	chr1	206097733	206099798	+	ENST00000331555.9	2	4	0	0	0	0	1.11398	0	0	0	0	0	0	0	0	0	0	0	0	0	0	0	0	0	0	0	0	0	0	0	0	0	0	0	0	0	0	0	0	0	0	0
chr1_230843354_230855718_-	ENSG00000119280.16	C1orf198	chr1	230843354	230855718	-	ENST00000470540.5	5	4	0	0	0	0	0	0	0	0	0	0	0	0	0	0	0	0	0	0	0	0	0	0	0	0	0	0	0	0	0	0	0	0	0	0.680851	0	0	0	0	0	0
chr1_230843354_230843896_-	ENSG00000119280.16	C1orf198	chr1	230843354	230843896	-	ENST00000470540.5	5	5	0.263777	0	0	0.673104	0.448354	0	0	0	0	0.581	0	0	0	0.373418	0	0	0	0.292181	0.454952	0.828154	0	1.02162	0	0.292128	0	0	0	0.26688	0.297656	1.2305	0	0	0.269653	1.54515	0.514804	0	1.30021	0	0.927074	0
chr1_184477386_184477603_+	ENSG00000116667.12	C1orf21	chr1	184477386	184477603	+	ENST00000235307.6	2	2	0	0	0	0	0	0	0	0	0	0	0	0	0	0	0	0	0	0	0	0	0	0	0	0	0	0	0	0	0	0	0	0	0	0	0	0.216034	0	0	0	0
chr1_184477386_184507682_+	ENSG00000116667.12	C1orf21	chr1	184477386	184507682	+	ENST00000235307.6	2	3	0	0	0	0	0.311608	0	0	0	0	0	0	0	0	0	0	0	0	0	0	0	0	0	0	0	0	0	0	0	0	0	0	0	0	0	0	0	0	0	0	0
chr1_184590739_184598461_+	ENSG00000116667.12	C1orf21	chr1	184590739	184598461	+	ENST00000235307.6	4	5	0	0	0	0	0	0	0	0	0	0	0	0	0	0	0	0	0	0	0	0	0	0	0	0	0	0	0	0	0	0	0	0	0	0	0	0	0	0	0.344189	0
chr1_44689676_44701119_+	ENSG00000198520.10	C1orf228	chr1	44689676	44701119	+	ENST00000458657.6	3	6	0	0	0	0	0	0	0	0	0	0	0	0	0	0	0.559125	0	0	0	0	0	0	0	0	0	0	0	0	0	0	0	0	0	0	0	0	0	0	0	0	0
chr1_44700923_44704173_+	ENSG00000198520.10	C1orf228	chr1	44700923	44704173	+	ENST00000458657.6	6	7	0	0	0	0	0	0	0	0	0	0	0	0	0	0	0	0	0	0	0.228832	0	0	0	0	0	0	0	0	0	0	0	0	0	0	0	0	0	0	0	0	0
chr1_186379767_186394015_+	ENSG00000157181.15	C1orf27	chr1	186379767	186394015	+	ENST00000287859.10	2	9	0	0	0	0	0	0	0	0	0	0.629299	0	0	0	0	0	0	0	0	0	0	0	0	0	0	0	0	0	0	0	0	0	0	0	0	0	0	0	0	0	0
chr1_186379767_186417654_+	ENSG00000157181.15	C1orf27	chr1	186379767	186417654	+	ENST00000287859.10	2	13	0	0	0	0	0	0	0	0	0	0	0	0	0	0	0	0	0	0.292181	0.291262	0	0	0	0	0	0	0	0	0	0	0	0	0	0	0	0	0	0	0	0	0
chr1_186383022_186394015_+	ENSG00000157181.15	C1orf27	chr1	186383022	186394015	+	ENST00000287859.10	3	9	0	0	0	0	0	0	0	0	0	0	0	0	0	0	0	0	0	0	0	0	0	0	0	0	0	0	0	0	0	0	0	0	0	0	0	0	0	0	0	0
chr1_186383022_186406268_+	ENSG00000157181.15	C1orf27	chr1	186383022	186406268	+	ENST00000287859.10	3	12	0	0	0	0	0	0	0	0	0	0	0	0	0	0	0	0	0	0	0	0	0	0	0	0	0	0	0	0	0	0	0	0	0	0	0	0	0	0.183442	0	0
chr1_186385988_186389624_+	ENSG00000157181.15	C1orf27	chr1	186385988	186389624	+	ENST00000287859.10	4	6	0	0	0	0	0	0	0	0	0	0	0	0	0	0	0	0	0	0	0	0	0	0	0	0	0	0	0	0	0	0	0	0	0	0	0	0	0	0	0	0
chr1_186388442_186394015_+	ENSG00000157181.15	C1orf27	chr1	186388442	186394015	+	ENST00000287859.10	5	9	0	0	0	0	0	0	0	0	0	0	0.251606	0	0	0	0	0	0	0	0	0	0	0	0.310838	0	0	0	0	0	0	0	0	0	0	0	0	0	0	0	0	0
chr1_186388442_186406268_+	ENSG00000157181.15	C1orf27	chr1	186388442	186406268	+	ENST00000287859.10	5	12	0	0	0	0	0	0	0	0	0	0	0	0	0	0	0	0	0	0	0	0	0	0	0	0	0	0	0	0	0	0	0	0	0	0	0	0	0	0	0	0
chr1_186388442_186417654_+	ENSG00000157181.15	C1orf27	chr1	186388442	186417654	+	ENST00000287859.10	5	13	0	0	0	0	0	0	0	0	0	0	0	0	0	0	0	0	0	0	0	0	0	0	0	0	0	0.468839	0	0	0	0	0	0	0	0	0	0	0	0	0	0
chr1_186390711_186391791_+	ENSG00000157181.15	C1orf27	chr1	186390711	186391791	+	ENST00000287859.10	7	8	0.791331	0.65048	0	0	2.58459	3.12402	1.1603	0.91768	0.267055	0	1.04177	0	7.85556	0	0	4.95195	1.06143	0	4.41485	1.1042	1.1736	2.38622	2.6873	0.983305	0.583509	1.29195	3.27891	0	0	0	0	1.11261	0	0	0.478793	1.9777	0	1.90238	2.81506	0
chr1_186390711_186394015_+	ENSG00000157181.15	C1orf27	chr1	186390711	186394015	+	ENST00000287859.10	7	9	0	0	0	0	0	0	0	0	0	0	0	0	0	0	0	0	0	0	0	0	0	0	0	0	0	0	0	0	0	0	0	0	0	0	0	0	0	0	0	0
chr1_186390711_186406268_+	ENSG00000157181.15	C1orf27	chr1	186390711	186406268	+	ENST00000287859.10	7	12	0	0.306634	0	0	0	0	0	0	0	0	0	0	0	0	0	0	0	0	0	0	0	0	0	0	0	0	0	0	0	0	0	0	0	0	0	0	0	0	0.359576	0
chr1_186391696_186406268_+	ENSG00000157181.15	C1orf27	chr1	186391696	186406268	+	ENST00000287859.10	8	12	0	0	0	0	0	0	0	0	0	0	0	0	0	0	0	0	0	0	0	0	0	0	0	0	0	0	0	0	0	0	0	0	0	0	0	0	0	0	0	0
chr1_186391696_186417654_+	ENSG00000157181.15	C1orf27	chr1	186391696	186417654	+	ENST00000287859.10	8	13	0	0	0	0	0	0	0	0	0	0	0	0	0	0	0	0	0	0	0	0	0	0	0	0	0	0	0	0.26688	0	0	0	0	0	0	0	0	0	0	0	0
chr1_186398313_186406268_+	ENSG00000157181.15	C1orf27	chr1	186398313	186406268	+	ENST00000287859.10	10	12	0	0	0	0	0	0	0.255961	0	0	0	0	0	0.571154	0	0	0	0	0	0.291262	0	0	0	0	0	0	0	0.596137	0	0	0	0	0	0	0	0	0	0	0	0	0
chr1_186406083_186411893_+	ENSG00000157181.15	C1orf27	chr1	186406083	186411893	+	ENST00000478571.1	3	4	0	0	0	0	0	0.256886	0	1.51991	0	0	0	0	0.285577	0	0	0	0	0	0.291262	0	0.234719	0	0	0	0	0	0.298068	0	0	0.229511	0	0	0.269653	0	0	0	0	0	0	0
chr1_228102643_228103049_-	ENSG00000143793.12	C1orf35	chr1	228102643	228103049	-	ENST00000472617.5	3	2	0	0	0	0	0	0	0	0	0	0	0	0	0	0	0	0	0	0	0	0	0	0	0	0	0	0	0	0	0	0	0	0	0	0	0	0	0	0.33668	0	0
chr1_228102310_228102688_-	ENSG00000143793.12	C1orf35	chr1	228102310	228102688	-	ENST00000472617.5	5	3	0	0	0	0	0	0	0	0	0	0	0	0	0	0	0	0	0	0	0	0	0	0	0	0	0	0	0	0	0	0	0	0	0	0	0	0	0	0	0	0
chr1_228102310_228102560_-	ENSG00000143793.12	C1orf35	chr1	228102310	228102560	-	ENST00000472617.5	5	4	0	0	0	0	0	0	0	0	0	0	0	0.24094	0	0	0	0	0	0	0	0	0	0	0	0	0	0	0	0	0	0	0	0	0	0	0	0	0	0	0	0
chr1_154213893_154214574_-	ENSG00000143612.19	C1orf43	chr1	154213893	154214574	-	ENST00000470180.2	4	3	0	0	0	0	0	0	0	0	0	0	0	0	0	0	0	0	0	0	0	0	0	0	0	0	0	0	0	0	0.352232	0	0	0	0.269653	0	0	0	0	0	0	0
chr1_154212458_154214574_-	ENSG00000143612.19	C1orf43	chr1	154212458	154214574	-	ENST00000470180.2	6	3	0	0	0	0	0	0	0	0	0	0	0	0	0	0	0	0	0	0	0	0	0	0	0	0	0	0	0	0	0	0	0	0	0	0	0	0	0	0	0.344189	0
chr1_154212320_154214574_-	ENSG00000143612.19	C1orf43	chr1	154212320	154214574	-	ENST00000470180.2	7	3	0	0	0	1.20929	0	0	0	0	0	0	0.251606	0	0	0	0	0	0.263939	0	0.228832	0.228857	0	0.187335	0	0	0	0	0	0	0	0	0	0	0	0	0	0.227166	0	0	0	0
chr1_154212320_154213946_-	ENSG00000143612.19	C1orf43	chr1	154212320	154213946	-	ENST00000470180.2	7	4	0	0.306634	0	0	0	0	0.320729	0	0	0	0	0	0	0	0	0.582502	0.791817	0	1.19574	0	0	0.246697	0	0	0	0	0	0.504184	0	0	0	0	0	0.565528	0	0	0	0	0.359576	0
chr1_154212320_154212624_-	ENSG00000143612.19	C1orf43	chr1	154212320	154212624	-	ENST00000470180.2	7	6	0	0	0	0	0	0	0	0	0	0	0	0	0	0	0	0	0	0	0	0	0	0.246697	0	0	0	0	0	0	0	0	0	0	0	0	0	0	0	0	0	0
chr1_42773563_42774868_+	ENSG00000164008.15	C1orf50	chr1	42773563	42774868	+	ENST00000372525.6	3	4	0	0	0	0	0	0	0	0	0	0	0	0	0	0	0	0	0	0	0	0	0	0	0	0	0	0	0	0	0	0	0	0	0	0	0	0	0	0	0	0
chr1_150272284_150274170_+	ENSG00000118292.8	C1orf54	chr1	150272284	150274170	+	ENST00000369102.5	2	4	0	0	0	0	0	0	0	0	0	0	0	0	0	0	0	0	0	0	0	0	0	0	0	0	0	0	0	0	0	0	0	0	0	0	0.257402	0	0	0	0	0
chr1_156407080_156407975_-	ENSG00000125462.16	C1orf61	chr1	156407080	156407975	-	ENST00000368243.5	6	5	0	0	0	0	0	0	0	0	0	0	0	0	0	0	0.483172	0	0	0	0.228832	0	0	0	0	0	0	0	0	0	0	0	0	0	0	0	0	0	0	0	0	0
chr1_156426798_156430119_-	ENSG00000125462.16	C1orf61	chr1	156426798	156430119	-	ENST00000469813.1	4	2	0	0	0	0	0	0	0	0	0	0	0	0	0	0	0	0	0	0	0	0	0	0.170444	0	0	0	0	0	0	0	0	0	0	0	0	0	0	0	0	0	0
chr1_1243444_1244105_-	ENSG00000184163.3	C1QTNF12	chr1	1243444	1244105	-	ENST00000330388.2	5	4	0	0	0	0	0	0	0	0	0	0	0	0	0	0	0	0	0	0	0	0	0	0	0	0	0	0	0	0	0	0	0	0	0	0	0	0	0	0	0	0
chr1_1242835_1244497_-	ENSG00000184163.3	C1QTNF12	chr1	1242835	1244497	-	ENST00000330388.2	7	2	0	0	0	0	0	0	0	0.414318	0	0	0	0	0	0	0	0	0	0	0	0	0	0	0	0	0	0	0	0	0	0	0	0	0	0	0	0	0	0	0	0
chr1_64550594_64641969_+	ENSG00000158966.13	CACHD1	chr1	64550594	64641969	+	ENST00000290039.5	2	8	0	0	0	0	0	0	0	0	0	0	0	0	0	0	0	0	0	0	0	0	0	0	0	0	0	0	0	0	0	0	0	0	0	0	0	0	0	0	0	0
chr1_64582156_64602912_+	ENSG00000158966.13	CACHD1	chr1	64582156	64602912	+	ENST00000290039.5	3	4	0	0	0	0	0	0.256886	0	0	0	0	0.503213	0	0	0	0	0	0	0	0	0	0.479282	0	0.310838	0.424084	0.583509	0	0	0	0	0	0	0	0	0	0	0	0	0.33668	0	0
chr1_64582156_64641969_+	ENSG00000158966.13	CACHD1	chr1	64582156	64641969	+	ENST00000290039.5	3	8	0	0	0	0	0	0.388474	0	0	0	0	0	0	0	0	0	0	0.263939	0	0	0	0	0	0	0	0	0	0	0	0	0	0	0	0	0	0	0	0	0	0	0
chr1_64602806_64634260_+	ENSG00000158966.13	CACHD1	chr1	64602806	64634260	+	ENST00000290039.5	4	7	0	0	0	0	0	0	0	0	0	0	0.538562	0	0	0	0	0	0	0	0	0	0	0	0	0	0	0	0	0	0	0	0	0	0	0	0	0	0	0	0	0
chr1_64602806_64641969_+	ENSG00000158966.13	CACHD1	chr1	64602806	64641969	+	ENST00000290039.5	4	8	0	0	0	0	0.224177	0	0	0	0	0	0.573911	0	0	0	0	0	0	0	0	0	0	0	0	0	0	0	0	0	0	0	0	0	0	0	0	0	0.447303	0	0	0
chr1_64602806_64654803_+	ENSG00000158966.13	CACHD1	chr1	64602806	64654803	+	ENST00000290039.5	4	12	0	0	0	0	0	0	0	0	0	0	0	0	0	0	0	0	0	0	0	0	0	0	0	0	0	0	0	0	0	0	0	0	0	0	0	0	0	0	0	0
chr1_64602806_64658873_+	ENSG00000158966.13	CACHD1	chr1	64602806	64658873	+	ENST00000290039.5	4	13	0	0	0	0	0	0	0	0	0	0	0	0	0	0	0	0	0	0	0	0	0	0	0	0	0	0	0	0	0	0	0	0	0	0	0	0	0.267418	0	0	0
chr1_64629355_64634260_+	ENSG00000158966.13	CACHD1	chr1	64629355	64634260	+	ENST00000290039.5	5	7	0	0	0	0	0	0.256886	0	0	0	0	0.573911	0	0	0	0	0	0	0	0	0	0	0	0	0	0	0	0	0	0	0	0	0	0	0	0	0.432068	0	0	0	0
chr1_64629355_64641969_+	ENSG00000158966.13	CACHD1	chr1	64629355	64641969	+	ENST00000290039.5	5	8	0.270788	0	0	0	0	0	0	0	0	0	1.76124	0	0.285577	0	0	0	0	0	0.22612	0	0	0	0	0.876384	0	0	0	0	0	0.250246	0	0	0	0	0	1.06556	0.585486	0	0	0
chr1_64632599_64634260_+	ENSG00000158966.13	CACHD1	chr1	64632599	64634260	+	ENST00000290039.5	6	7	0	0	0	0	0	0	0	0	0	0	0	0	0	0	0	0	0	0	0	0	0.234719	0	0	0	0	0	0	0	0	0	0	0	0	0	0	0	0	0	0	0
chr1_64632599_64641969_+	ENSG00000158966.13	CACHD1	chr1	64632599	64641969	+	ENST00000290039.5	6	8	0	0	0	0	0	0	0	0	0	0	0	0	0	0	0	0	0	0	0	0	0	0	0	0	0	0	0	0	0	0	0	0	0	0.261939	0	0	0	0	0	0
chr1_64634044_64641969_+	ENSG00000158966.13	CACHD1	chr1	64634044	64641969	+	ENST00000290039.5	7	8	0	0	0	0	0	0	0	0	0	0	0	0	0	0	0	0	0	0	0	0	0	0	0	0	0	0	0	0	0	0	0	0	0	0	0	0	0	0	0	0
chr1_64647801_64658873_+	ENSG00000158966.13	CACHD1	chr1	64647801	64658873	+	ENST00000290039.5	9	13	0	0	0	0	0	0	0	0	0	0	0	0	0	0	0	0	0	0	0	0	0	0	0	0	0	0	0	0	0	0	0	0	0	0	0	0	0.447303	0	0	0
chr1_64647801_64675983_+	ENSG00000158966.13	CACHD1	chr1	64647801	64675983	+	ENST00000290039.5	9	21	0	0	0	0	0	0	0	0	0	0	0	0	0	0	0	0	0	0	0	0	0	0	0	0	0	0	0	0	0	0	0	0	0	0	0	0	0	0	0	0
chr1_64658705_64675983_+	ENSG00000158966.13	CACHD1	chr1	64658705	64675983	+	ENST00000290039.5	13	21	0	0	0	0	0	0	0	0	0	0	0	0	0	0	0	0	0	0	0	0	0	0	0	0	0	0	0	0	0	0	0	0	0	0	0	0	0.447303	0	0	0
chr1_64663695_64664679_+	ENSG00000158966.13	CACHD1	chr1	64663695	64664679	+	ENST00000290039.5	14	15	0	0	0	0	0	0	0	0	0	0	0.286956	0	0	0	0	0.291251	0	0	0	0	0	0	0	0	0	0	0	0	0	0.250246	0	0	0	0	0	0	0	0	0	0
chr1_64663695_64675983_+	ENSG00000158966.13	CACHD1	chr1	64663695	64675983	+	ENST00000290039.5	14	21	0	0	0	0	0	0	0	0	0	0	0	0	0	0	0	0.302829	0	0	0	0	0	0	0	0	0	0	0	0	0	0	0	0	0	0	0	0	0	0	0	0
chr1_64666057_64675983_+	ENSG00000158966.13	CACHD1	chr1	64666057	64675983	+	ENST00000290039.5	16	21	0.527554	0	0	0	0	0	0	0	0	0.547384	0	0	0	0	0	0.302829	0	0.584363	0	0	0	0	0	0.399049	0	0	0	0	0	0.500492	0	0	0	0	0	0.432068	0	0	0	0
chr1_64673158_64675983_+	ENSG00000158966.13	CACHD1	chr1	64673158	64675983	+	ENST00000290039.5	18	21	0	0	0	0	0	0	0	0	0	0	0	0	0	0	0	0.332188	0	0	0	0	0	0	0	0	0	0	0	0	0	0	0	0	0	0	0	0	0	0	0	0
chr1_64673348_64675561_+	ENSG00000158966.13	CACHD1	chr1	64673348	64675561	+	ENST00000290039.5	19	20	0	0	0	0	0	1.04134	0	0	0	0	0	0	0	0	0	0	0	0	0	0	0	0	0.994488	0	0	0	0	0	0	0	0	0	0	0	0	0	0	0	0	0
chr1_64673348_64675983_+	ENSG00000158966.13	CACHD1	chr1	64673348	64675983	+	ENST00000290039.5	19	21	0	0	0	0	0	0	0	0	0	0	0	0	0	0	0	0	0	0	0	0	0	0.246697	0	0	0	0	0	0	0	0	0	0	0	0	0	0	0	0	0	0
chr1_64676895_64679756_+	ENSG00000158966.13	CACHD1	chr1	64676895	64679756	+	ENST00000290039.5	22	24	0.241694	0.306634	0	0	0.625364	0	0	0	0	0	0	0	0	0	0	0	0	0	0	0	0	0	0	0	0	0	0	0	0	0	0	0	0	0	0	0	0.267418	0	0	0
chr1_64582156_64613518_+	ENSG00000158966.13	CACHD1	chr1	64582156	64613518	+	ENST00000470527.1	2	4	0	0	0	0	0	0	0	0	0	0	0	0	0	0	0	0	0	0	0	0	0	0	0.621676	0	0	0	0	0	0	0	0	0	0	0	0	0	0	0	0	0
chr1_64602806_64613518_+	ENSG00000158966.13	CACHD1	chr1	64602806	64613518	+	ENST00000470527.1	3	4	0	0	0	0	0	0	0	0	0	0	0	0	0	0	0	0	0	0	0	0	0	0	0	0	0	0	0	0	0	0	0	0	0	0	0	0	0.267418	0	0	0
chr1_181577766_181580776_+	ENSG00000198216.11	CACNA1E	chr1	181577766	181580776	+	ENST00000357570.9	4	6	0	0	0	0	0	0	0	0	0	0	0	0	0	0	0	0	0	0	0	0	0	0	0	0	0	0	0	0	0	0	0	0	0	0	0	0	0	0	0.344189	0
chr1_181577766_181651441_+	ENSG00000198216.11	CACNA1E	chr1	181577766	181651441	+	ENST00000357570.9	4	7	0	0	0	0	0	0	0	0	0	0	0	0	0	0	0	0	0	0	0	0	0	0	0	0	0	0	0	0	0	0	0	0	0	0	0	0	0	0	0	0
chr1_181579072_181580776_+	ENSG00000198216.11	CACNA1E	chr1	181579072	181580776	+	ENST00000357570.9	5	6	0	0	0	0	0	0	0	0	0	0	0	0	0	0	0	0	0	0	0	0	0	0	0	0	0	0	0	0	0	0	0	0	0	0	0	0	0	0	0	0
chr1_181483744_181511510_+	ENSG00000198216.11	CACNA1E	chr1	181483744	181511510	+	ENST00000524607.6	3	5	0	0	0	0	0	0	0	0	0	0	0	0	0	0	0	0	0	0	0	0	0	0	0	0	0	0	0	0	0	0	0	0	0	0	0	0	0	0	0	0
chr1_181483744_181580776_+	ENSG00000198216.11	CACNA1E	chr1	181483744	181580776	+	ENST00000524607.6	3	8	0	0	0	0	0	0	0	0	0	0	0	0	0	0	0	0	0	0	0	0	0	0	0	0	0	0	0	0	0	0	0	0	0	0	0	0	0	0	0	0
chr1_181483744_181651441_+	ENSG00000198216.11	CACNA1E	chr1	181483744	181651441	+	ENST00000524607.6	3	9	0	0	0	0	0	0	0	0	0	0	0	0	0	0	0	0	0	0	0	0	0	0	0	0	0	0	0	0	0	0	0	0	0	0	0	0	0	0	0	0
chr1_175004614_175008706_+	ENSG00000116161.17	CACYBP	chr1	175004614	175008706	+	ENST00000613570.4	2	5	0	0	0	0	0	0	0	0	0	0	0.400444	0.24094	0	0	0	0	0.627556	0	0.22612	0	0	0.187335	0	0	0	0	0.298068	0.176584	0	0	0	0	0	0	0.239396	0	0	0.16834	0	0
chr1_200760839_200761098_+	ENSG00000118200.14	CAMSAP2	chr1	200760839	200761098	+	ENST00000236925.8	2	2	4.43094	0.613268	0.406021	1.20929	0.224177	0.870486	0.969104	0	0	0	2.77095	0.637895	0.285577	0.186709	0.558285	0.332188	2.67035	0.422015	2.14009	0.733766	0	2.95537	1.45086	1.85651	0	0.645973	0.298068	2.81738	2.4904	0.959514	0	0.298654	1.15024	1.72836	0	3.89627	5.55578	0	4.56678	0
chr1_200760839_200807537_+	ENSG00000118200.14	CAMSAP2	chr1	200760839	200807537	+	ENST00000236925.8	2	3	0	0	0	0	0	0	0	0	0.563747	0	0	0.24094	0	0	0	0	0	0	0	0	0	0	0	0	0	0	0	0	0	0	0	0	0	0	0	0	0	0	0	0
chr1_200760839_200815644_+	ENSG00000118200.14	CAMSAP2	chr1	200760839	200815644	+	ENST00000236925.8	2	4	0.541577	0	1.64199	1.34621	1.96352	0.652864	1.20013	2.25571	2.96724	1.17668	0.286956	0.920574	0	2.542	3.03637	1.20594	0	4.99937	2.1428	0.758308	6.81263	1.89073	1.26401	2.44395	0.692705	1.72994	1.4905	3.52772	1.65201	2.03087	0	1.61848	2.93453	1.05787	0.496798	0.227166	0	1.08555	4.96723	0
chr1_200760839_200832341_+	ENSG00000118200.14	CAMSAP2	chr1	200760839	200832341	+	ENST00000236925.8	2	6	0	0	0	0	0	0	0	0	0	0	0	0	0	0	0	0	0	0	0.452239	0	0	0	0	0	0	0	0	0	0	0	0	0	0	0	0	0	0	0	0	0
chr1_200760839_200832845_+	ENSG00000118200.14	CAMSAP2	chr1	200760839	200832845	+	ENST00000236925.8	2	7	0	0.343846	0	0	0.311608	0	0.472086	0	0.281873	0	0	0.438693	0.620102	0	0	0.605658	0	0	0	1.26385	1.00337	0	0	2.01668	0.583509	0.468839	0.298068	0.796633	1.00212	0.250246	0	0	0.808958	0	0	0	0	0	0.359576	0
chr1_200807376_200815644_+	ENSG00000118200.14	CAMSAP2	chr1	200807376	200815644	+	ENST00000236925.8	3	4	1.05406	0	0	0	2.31754	0.776948	0	0	0	0.629299	0.286956	0.24094	0	0.168313	0.483172	0	0.263939	0	0.678359	0.252769	0	0.170444	0.276394	0.399049	0.692705	0	0	0.831783	0	0.500492	0	0	0	0.680851	0	0	0	0	1.04795	0
chr1_200807376_200832845_+	ENSG00000118200.14	CAMSAP2	chr1	200807376	200832845	+	ENST00000236925.8	3	7	0	0	0.732677	0	0.311608	0.217621	0.216125	0	0	0	0	0	0	0.168313	0	0	0	0.422015	1.16505	0	0.262044	0	0.276394	0	0	0	0	0.3276	0.649888	0.280616	0	0	0	0.261939	0	0.216034	0.292743	0	1.60006	0
chr1_200807376_200842087_+	ENSG00000118200.14	CAMSAP2	chr1	200807376	200842087	+	ENST00000236925.8	3	8	0	0	0	0	0	0	0	0	0	0	0	0	0	0	0	0	0	0	0	0	0	0	0	0	0	0	0	0	0	0	0	0	0	0	0	0	0	0	0	0
chr1_200807376_200857424_+	ENSG00000118200.14	CAMSAP2	chr1	200807376	200857424	+	ENST00000236925.8	3	17	0	0	0	0	0	0	0	0	0	0	0	0	0	0	0	0	0	0	0	0	0	0	0	0	0	0	0	0	0	0	0	0	0	0	0	0	0.267418	0	0	0
chr1_200815561_200832845_+	ENSG00000118200.14	CAMSAP2	chr1	200815561	200832845	+	ENST00000236925.8	4	7	0	0	0	0	0	0.217621	0	0	0	0	0	0	0	0	0	0.332188	0	0.422015	0	0	0	0	0	0	0	0	0	0	0	0	0	0	0	0	0	0	0	0	0	0
chr1_200815561_200842087_+	ENSG00000118200.14	CAMSAP2	chr1	200815561	200842087	+	ENST00000236925.8	4	8	0	0	0	0	0	0	0	0	0	0	0	0	0	0	0	0	0	0	0	0	0	0.187335	0	0	0	0	0	0	0	0	0	0	0	0	0	0	0	0	0.359576	0
chr1_200832200_200832845_+	ENSG00000118200.14	CAMSAP2	chr1	200832200	200832845	+	ENST00000236925.8	6	7	0	0	0	0	0.401187	0	0	0	0	0	0	0.559888	0	0	0	0	0	0	0	0	0	0	0	0	0	0	0	0	0	0	0	0.859673	0	0	0	0.454332	0	0	0.344189	0
chr1_200832200_200842087_+	ENSG00000118200.14	CAMSAP2	chr1	200832200	200842087	+	ENST00000236925.8	6	8	0	0	0	0	0	0	0	0	0	0	0	0	0	0	0	0	0	0	0	0	0	0	0	0	0	0	0	0	0	0	0	0	0	0	0	0	0	0	0	0
chr1_200841994_200844869_+	ENSG00000118200.14	CAMSAP2	chr1	200841994	200844869	+	ENST00000236925.8	8	9	0	0	0	0	0	0	0	0	0	0	0	0	0	0	0	0	0	0	0	0	0	0	0	0	0	0	0.594077	0	0	0	0	0	0	0	0	0	0	0	0	0
chr1_200844782_200853495_+	ENSG00000118200.14	CAMSAP2	chr1	200844782	200853495	+	ENST00000236925.8	9	14	0	0	0	0	0	0	0	0	0	0	0	0	0	0	0	0	0	0	0	0	0	0	0	0	0	0	0	0	0	0	0	0	0	0	0	0	0	0	0	0
chr1_200844782_200857424_+	ENSG00000118200.14	CAMSAP2	chr1	200844782	200857424	+	ENST00000236925.8	9	17	0	0	0	0	0	0	0	0	0	0	0	0	0	0	0	0	0	0	0	0	0	0	0	0	0	0	0	0	0	0	0	0	0	0	0	0	0.292743	0	0	0
chr1_200847640_200852677_+	ENSG00000118200.14	CAMSAP2	chr1	200847640	200852677	+	ENST00000236925.8	11	13	0	0	0	0	0.224177	0	0	0	0	0	0	0	0	0	0	0	0	0	0	0	0	0	0	0	0	0	0	0	0	0	0	0	0	0	0	0	0	0	0	0
chr1_200847640_200857424_+	ENSG00000118200.14	CAMSAP2	chr1	200847640	200857424	+	ENST00000236925.8	11	17	0	0	0	0	0	0	0	0.22942	0	0	0	0	0	0	0	0	0	0	0	0	0	0	0	0	0	0	0	0	0	0	0	0	0	0	0	0	0	0	0	0
chr1_200852541_200854889_+	ENSG00000118200.14	CAMSAP2	chr1	200852541	200854889	+	ENST00000236925.8	13	15	0	0	0	0	0	0	0	0	0	0	0	0	0	0	0	0	0	0	0	0	0	0	0.621676	0	0	0	0	0	0	0	0	0	0	0	0	0	0	0	0	0
chr1_200852541_200856125_+	ENSG00000118200.14	CAMSAP2	chr1	200852541	200856125	+	ENST00000236925.8	13	16	0	0	0	0	0	0	0	0	0	0	0	0	0.285577	0	0	0	0	0	0	0	0	0	0	0	0	0	0	0	0	0	0	0.298654	0	0	0	0	0	0	0	0
chr1_200852541_200857424_+	ENSG00000118200.14	CAMSAP2	chr1	200852541	200857424	+	ENST00000236925.8	13	17	0	0	0	0	0	0	0	0	0	0	0.251606	0	0	0	0	0	0.821239	0	0	0	0.479282	0.187335	0.310838	0.292128	0	0	0	0	0	0	0	0	0	0	0	0	0	0	0.703765	0
chr1_200853275_200856125_+	ENSG00000118200.14	CAMSAP2	chr1	200853275	200856125	+	ENST00000236925.8	14	16	0	0	0	0	0	0	0	0	0	0	0	0	0	0	0	0	0	0	0	0	0	0	0	0	0	0	0	0	0	0	0	0	0	0	0	0	0	0	0	0
chr1_200853275_200857424_+	ENSG00000118200.14	CAMSAP2	chr1	200853275	200857424	+	ENST00000236925.8	14	17	0	0	0	0	0	0	0	0	0	0	0	0	0	0	0	0	0	0	0	0	0	0	0	0	0	0	0	0	0	0.229511	0	0	0	0	0	0	0	0	0	0
chr1_6820181_6825210_+	ENSG00000171735.18	CAMTA1	chr1	6820181	6825210	+	ENST00000303635.11	2	3	1.72095	0	0	0.604644	1.60475	0.513773	1.02384	0	0	0	0.251606	1.51528	0.345927	0.374527	0.316699	0.302829	0	2.11832	0.291262	0	0	0.246697	0	0.292128	0	0	0.596137	0	0.892968	0	0	0	0.225925	1.88534	0.239396	1.52337	2.32405	0.183442	1.37675	0
chr1_6820181_7091371_+	ENSG00000171735.18	CAMTA1	chr1	6820181	7091371	+	ENST00000303635.11	2	4	0	0	0	0	0	0	0	0	0	0	0	0	0	0	0	0	0	0	0	0	0	0	0	0	0	0	0	0	0	0	0	0	0	0	0	0	0	0	0	0
chr1_7249491_7249626_+	ENSG00000171735.18	CAMTA1	chr1	7249491	7249626	+	ENST00000303635.11	5	5	0	0	0	0	0	0	0	0	0	0	0	0	0.345927	0	0	0	0	0	0	0	0	0	0	0	0	0	0	0	0	0	0	0	0	0	0	0	0	0	0	0
chr1_7732448_7752533_+	ENSG00000171735.18	CAMTA1	chr1	7732448	7752533	+	ENST00000303635.11	12	21	0	0	0	0	0	0	0	0	0	0	0	0	0	0	0	0	0	0	0	0	0	0	0	0.399049	0	0	0	0	0	0	0	0	0	0	0	0	0	0	0	0
chr1_7736344_7738482_+	ENSG00000171735.18	CAMTA1	chr1	7736344	7738482	+	ENST00000303635.11	13	16	0	0	0	0	0	0	0	0	0	0	0	0	0	0	0	0	0	0	0	0	0	0	0	0	0	0	0	0	0	0	0	0	0	0	0	0	0	0	0	0
chr1_6820181_6871840_+	ENSG00000171735.18	CAMTA1	chr1	6820181	6871840	+	ENST00000461311.1	2	4	0	0	0	0	0.623215	0	0	0	0	0	0	0	0	0	0	0	0	0	0	0	0	0	0	0	0	0	0	0	0	0	0	0	0	0	0	0	0	0	0	0
chr1_6871757_6886346_+	ENSG00000171735.18	CAMTA1	chr1	6871757	6886346	+	ENST00000461580.5	2	3	0	0	0	0	0	0	0	0	0	0	0	0	0	0	0	0	0	0	0	0	0	0	0	0	0	0	0	0	0	0	0	0	0	0	0	0	0	0	0	0
chr1_6806983_6825210_+	ENSG00000171735.18	CAMTA1	chr1	6806983	6825210	+	ENST00000467404.6	2	3	2.52736	0.306634	2.45404	0	1.83153	1.68041	0	0.68826	1.86939	0	1.07712	0.722821	1.59753	0.355022	0.874983	2.80816	2.31654	4.39074	2.47018	0	1.26541	1.03851	0.994488	0	2.07811	0.432484	1.18815	2.16218	1.94966	0.688534	1.37492	0.597308	1.07861	2.2626	0.797622	1.82394	0.534836	1.37692	2.72495	0
chr1_40059334_40059458_+	ENSG00000131236.16	CAP1	chr1	40059334	40059458	+	ENST00000372792.6	2	2	0	0	0	0	0	0	0	0	0	0	0	0	0	0	0	0	0	0	0	0	0	0	0	0	0	0	0	0	0	0	0	0	0	0.188509	0	0	0	0	0	0
chr1_40059334_40061812_+	ENSG00000131236.16	CAP1	chr1	40059334	40061812	+	ENST00000372792.6	2	4	0	0	0	0	0	0	0	0	0	0	0	0	0	0	0	0	0.547492	0	0	0	0	0	0	0.399049	0	0	0	0	0	0	0	0	0	0	0	0	0	0	0	0
chr1_40059334_40064559_+	ENSG00000131236.16	CAP1	chr1	40059334	40064559	+	ENST00000372792.6	2	6	0	0	0	0	0	0	0	0	0	0	0	0	0	0	0	0	0	0	0	0	0	0	0	0	0	0	0	0	0	0	0	0	0	0	0	0	0	0	0	0
chr1_40059337_40061812_+	ENSG00000131236.16	CAP1	chr1	40059337	40061812	+	ENST00000372797.7	2	4	0	0	0	0	0	0	0	0	0	0	0	0	0	0	0	0	0	0	0	0	0	0	0	0	0	0	0	0	0	0	0	0	0.721503	0	0	0	0	0	0	0
chr1_40059337_40064559_+	ENSG00000131236.16	CAP1	chr1	40059337	40064559	+	ENST00000372797.7	2	6	0	0	0	0	0	0	0	0	0	0	0	0	0	0	0	0	0	0	0	0	0	0	0	0	0	0	0	0	0	0	0	0	0	0	0	0	0	0	0	0
chr1_40064227_40064559_+	ENSG00000131236.16	CAP1	chr1	40064227	40064559	+	ENST00000372797.7	5	6	1.05406	0	0.988682	0	1.24858	0.435243	0.320729	0.506379	0.281873	2.3723	0	0.956843	1.03778	0.710598	0.316699	0.605658	1.2355	0.620888	0.972333	0.228857	1.428	0	0.276394	0.424084	0	0	0.297039	0.947649	0.947544	1.9383	0.838668	0.252936	0.56721	1.05787	0.527512	0.659234	3.14681	0.843034	2.3346	0
chr1_40041429_40064559_+	ENSG00000131236.16	CAP1	chr1	40041429	40064559	+	ENST00000414281.5	2	7	0	0	0	0	0	0	0	0	0	0	0	0	0	0	0	0	0	0	0	0	0	0	0	0	0	0	0	0.26688	0	0	0	0	0	0	0	0	0	0	0	0
chr1_223717762_223747165_+	ENSG00000162909.17	CAPN2	chr1	223717762	223747165	+	ENST00000433674.6	2	5	0	0	0	0	0.401187	0	0	0	0	0	0	0	0	0	0	0	0	0	0	0	0	0	0	0	0	0	0	0	0	0	0	0	0	0	0	0	0	0	0	0
chr1_223744100_223745439_+	ENSG00000162909.17	CAPN2	chr1	223744100	223745439	+	ENST00000433674.6	3	4	0	0	0	0	0	0	0	0	0	0	0	0	0	0	0	0	0	0	0	0.252769	0.479282	0	0.621676	0	0	1.29745	0	0.26688	0	0	0	0	0	0	0.27011	0	0.292743	0	0	0
chr1_223744100_223747165_+	ENSG00000162909.17	CAPN2	chr1	223744100	223747165	+	ENST00000433674.6	3	5	0	0	0	0	0	0	0	0	0	0	0	0	0	0	0	0	0	0	0.22612	0	0	0	0	0	0	0	0	0	0	0	0	0	0	0	0	0.216034	0	0	0	0
chr1_223744100_223749122_+	ENSG00000162909.17	CAPN2	chr1	223744100	223749122	+	ENST00000433674.6	3	6	0	0	0.326655	0	0	0	0	0	0	0	0	0	0	0	0	0	0	0	0	0	0.234719	0	0	0	0	0	0	0.176584	0	0	0	0	0	0	0	0	0	0	0.359576	0
chr1_223744100_223750975_+	ENSG00000162909.17	CAPN2	chr1	223744100	223750975	+	ENST00000433674.6	3	7	0	0	0	0	0	0	0	0	0	0	0	0	0	0	0	0	0	0	0	0	0	0	0	0	0	0	0	0	0	0	0	0	0	0	0	0	0	0	0	0
chr1_223744100_223752071_+	ENSG00000162909.17	CAPN2	chr1	223744100	223752071	+	ENST00000433674.6	3	8	0	0.406923	0	0	0	0	0	0	0	0	0	0.963762	0	0	0	0	0.527878	0	0	0	0	0	0	0	0	0	0	0	0	0.561233	0	0	0	0	0	0	0	0	0	0
chr1_223746997_223749122_+	ENSG00000162909.17	CAPN2	chr1	223746997	223749122	+	ENST00000433674.6	5	6	0	0	0	0	0	0	0	0	0.281873	0.581	0	0	0	0	0	0	0	0.292181	0	0	0	0	0.276394	0	0	0	0	0	0	0	0	0.298654	0	0	0.257402	0	0	0	0	0
chr1_223750890_223752956_+	ENSG00000162909.17	CAPN2	chr1	223750890	223752956	+	ENST00000433674.6	7	9	0	0	0	0	0	0	0	0	0	0	0	0	0	0	0	0	0	0	0	0	0	0	0	0	0	0	0	0	0	0	0	0	0	0	0.27011	0	0	0	0	0
chr1_223755480_223755649_+	ENSG00000162909.17	CAPN2	chr1	223755480	223755649	+	ENST00000433674.6	10	10	0	0	0	0	0	0	0	0	0	0	0	0	0	0	0	0	0	0	0	0	0	0	0	0	0	0	0	0	0	0	0	0	0	0	0	0	0	0	0	0
chr1_223759270_223762251_+	ENSG00000162909.17	CAPN2	chr1	223759270	223762251	+	ENST00000433674.6	12	14	0	0	0	0	0	0	0	0	0	0	0	0	0	0	0	0	0	0	0	0	0	0.170444	0	0	0	0	0	0	0	0	0	0	0	0	0	0	0	0.338014	0	0.364473
chr1_223759270_223764207_+	ENSG00000162909.17	CAPN2	chr1	223759270	223764207	+	ENST00000433674.6	12	15	0	0	0	0	0	0	0	0	0	0	0	0	0	0	0	0	0	0	0	0	0	0	0	0	0	0	0	0	0	0	0	0	0	0	0	0	0.292743	0	0	0
chr1_223759270_223772239_+	ENSG00000162909.17	CAPN2	chr1	223759270	223772239	+	ENST00000433674.6	12	20	0.263777	0	0.653311	0	0	0	1.02384	1.1056	0	1.09477	0	0.637895	0	1.25399	0	0.937846	0.263939	0.620888	0.582524	0.91543	0.262044	0	0.994488	0	0	0	0.894205	0.353169	2.38125	0.229511	0	0	0.539305	4.03286	0.772206	0	0	0.917209	3.19002	0
chr1_223762186_223770525_+	ENSG00000162909.17	CAPN2	chr1	223762186	223770525	+	ENST00000433674.6	14	18	0	0	0	0	0	0	0	0	0	0	0	0	0	0	0	0	0	0	0	0	0	0	0	0	0	0	0	0	0	0	0	0	0	0	0	0	0	0	0	0
chr1_223762186_223772239_+	ENSG00000162909.17	CAPN2	chr1	223762186	223772239	+	ENST00000433674.6	14	20	0	0	0	0	0	0	0	0	0	0	0	0	0	0	0	0	0	0	0	0	0	0	0	0	0	0	0	0	0	0	0	0	0	0	0	0	0	0	0	0
chr1_223764150_223772239_+	ENSG00000162909.17	CAPN2	chr1	223764150	223772239	+	ENST00000433674.6	15	20	0	0	0	0	0	0	0	0	0	0	0	0	0	0	0	0.605658	0	0	0	0	0	0	0	0	0	0	0	0	0	0	0	0	0	0	0	0	0	0	0	0
chr1_223766367_223770525_+	ENSG00000162909.17	CAPN2	chr1	223766367	223770525	+	ENST00000433674.6	16	18	0	0	0	0	0	0	0	0	0	0	0	0	0	0	0	0	0	0	0	0	0	0	0	0	0	0	0	0	0	0	0	0	0	0	0	0	0	0	0	0
chr1_223766367_223772239_+	ENSG00000162909.17	CAPN2	chr1	223766367	223772239	+	ENST00000433674.6	16	20	0	0	0	0	0	0	0	0	0	0	0	0.24094	0	0	0	0	0	0	0	0	0	0	0	0	0	0	0	0	0	0	0	0	0	0	0	0	0	0	0	0
chr1_223622815_223628780_-	ENSG00000203697.11	CAPN8	chr1	223622815	223628780	-	ENST00000366872.9	7	3	0	0	0	0	0	0	0	0	0	0	0	0	0	0	0	0	0	0	0	0	0	0	0	0	0	0	0	0	0	0	0	0	0	0	0	0	0	0	0	0
chr1_223619293_223620266_-	ENSG00000203697.11	CAPN8	chr1	223619293	223620266	-	ENST00000366872.9	9	8	0	0	0	0	0	0	0	0	0	0	0	0	0	0	0	0	0	0	0	0.552102	0	0	0	0	0	0	0	0	0	0	0	0	0	0	0	0	0	0	0	0
chr1_223615970_223620266_-	ENSG00000203697.11	CAPN8	chr1	223615970	223620266	-	ENST00000366872.9	10	8	0	0	0	0	0	0	0	0	0	0	0	0	0	0	0	0	0	0	0	0	0	0	0	0	0	0	0	0	0	0	0	0	0	0	0	0	0	0	0	0
chr1_223549318_223616145_-	ENSG00000203697.11	CAPN8	chr1	223549318	223616145	-	ENST00000366872.9	16	10	0	0	0	0	0	0	0	0	0	0	0	0	0	0	0	0	0	0	0	0	0	0	0	0	0	0	0	0	0	0	0	0	0	0.188509	0	0	0	0	0	0
chr1_223543108_223544850_-	ENSG00000203697.11	CAPN8	chr1	223543108	223544850	-	ENST00000366872.9	20	18	0	0	0	0	0	0	0.255961	0	0	0	0	0	0	0	0	0	0	0.292181	0	0	0	0	0	0	0	0	0	0	0	0	0	0	0	0	0	0	0	0	0	0
chr1_112647210_112659779_+	ENSG00000116489.12	CAPZA1	chr1	112647210	112659779	+	ENST00000263168.3	2	7	0.483388	0	0	0	0	0	0	0	0.267055	0	0	0	0.285577	0	0	0	0.263939	0	0	0	0.524088	0	0	0	0	0	0	0	0.352232	0	0	0	0	0	0	0	0	0.338014	0	0
chr1_112647210_112667145_+	ENSG00000116489.12	CAPZA1	chr1	112647210	112667145	+	ENST00000263168.3	2	8	0	0	0	0	0	0	0	0	0	0	0	0	0	0	0	0	0	0	0	0	0	0	0	0	0	0	0	0	0	0	0	0	0	0.261939	0	0	0	0	0	0
chr1_112647210_112669605_+	ENSG00000116489.12	CAPZA1	chr1	112647210	112669605	+	ENST00000263168.3	2	9	0	0	0	0	0	0	0	0	0	0	0	0	0	0	0	0	0	0	0	0	0	0	0	0	0	0	0	0	0	0	0	0	0	0	0	0	0	0	0	0
chr1_112649418_112659779_+	ENSG00000116489.12	CAPZA1	chr1	112649418	112659779	+	ENST00000263168.3	3	7	0	0	0	0	0.448354	0	0	0	0	0	0	0	0	0	0	0	0	0	0	0	0	0	0	0	0	0	0	0	0	0	0	0	0	0	0	0	0	0	0	0
chr1_112653598_112654671_+	ENSG00000116489.12	CAPZA1	chr1	112653598	112654671	+	ENST00000263168.3	4	5	0	0.306634	0	0	0	0	0	0	0	0	0	0	0	0.186709	0	0	0.263939	0	0	0	0	0	0	0	0	0	0	0	0	0	0	0	0	0.680851	0	0	0	0	0	0
chr1_112653598_112659779_+	ENSG00000116489.12	CAPZA1	chr1	112653598	112659779	+	ENST00000263168.3	4	7	2.96658	2.79692	4.96081	2.48704	1.07157	1.30573	1.92126	0.830878	3.71417	2.29038	4.67687	2.84118	1.83416	2.16692	2.08291	5.96009	4.00966	4.30969	8.55557	3.28348	4.01127	2.22293	1.28467	0	2.07811	3.02188	0.892145	2.17176	4.07546	1.65333	1.64305	1.15833	1.60209	2.44075	1.7478	3.50421	2.77548	3.27664	6.67807	2.18684
chr1_112653598_112667145_+	ENSG00000116489.12	CAPZA1	chr1	112653598	112667145	+	ENST00000263168.3	4	8	0	0.750769	0	0	0	0.435243	0	0	0.267055	0	0.825518	0.481881	0	0.56179	0	0.291251	0	1.29856	0.520094	0.276051	0	0	0	0	0	0.322986	0	0	0	0.280616	0	0.298654	0	1.31981	0	0.432068	0	1.54793	0.359576	0.364473
chr1_112653598_112669605_+	ENSG00000116489.12	CAPZA1	chr1	112653598	112669605	+	ENST00000263168.3	4	9	0	0	0	0	0	0	0	0	0	0	0	0	0	0	0	0.302829	0	0	0	0	0	0	0.276394	0	0	0	0	0	0	0	0	0	0	0	0	0	0	0	0	0
chr1_112659022_112659779_+	ENSG00000116489.12	CAPZA1	chr1	112659022	112659779	+	ENST00000263168.3	6	7	0	0	0	0	0	0	0	0	0	0	0	0	0	0	0	0	0	0	0	0	0	0	0	0	0	0	0	0	0	0	0	0	0.269653	0	0	0	0	0	0	0
chr1_112659022_112667145_+	ENSG00000116489.12	CAPZA1	chr1	112659022	112667145	+	ENST00000263168.3	6	8	0	0	0.406021	0	0	0	0	0	0	0	0	0	0	0	0	0	0.273746	0	0	0	0	0	0	0	0	0	0.297039	0	0	0.250246	0	0	0	0	0	0	0	0	0	0
chr1_112659701_112669605_+	ENSG00000116489.12	CAPZA1	chr1	112659701	112669605	+	ENST00000263168.3	7	9	0	0	0	0	0	0	0	0	0	0	0	0	0	0	0	0	0	0	0	0	0	0	0	0	0	0	0.496832	0	0	0	0.279556	0	0	0	0	0	0	0	0	0
chr1_19378540_19419750_-	ENSG00000077549.17	CAPZB	chr1	19378540	19419750	-	ENST00000375142.5	4	2	0.241694	0	0	0	0	0	0	0	0	0	0	0	0	0	0	0	0	0	0	0	0.786132	0	0	1.27225	0	0	0	0	0	0	0	0	0.269653	0	0	0	0	0.16834	0.344189	0
chr1_19378540_19385626_-	ENSG00000077549.17	CAPZB	chr1	19378540	19385626	-	ENST00000375142.5	4	3	0	0	0	0	0.623215	0	0.216125	0	0	0	0	0	0	0	0	0	0	0	0	0	0	0	0	0	0	0	0	0	0	0	0	0	0	0	0	0	0.267418	0	0	0
chr1_19356635_19419750_-	ENSG00000077549.17	CAPZB	chr1	19356635	19419750	-	ENST00000375142.5	6	2	0	0	0	0	0	0	0	0	0	0	0	0	0	0.186709	0	0	0	0	0	0	0	0	0	0	0	0	0	0	0	0	0	0	0	0	0	0	0	0	0	0
chr1_19356635_19385626_-	ENSG00000077549.17	CAPZB	chr1	19356635	19385626	-	ENST00000375142.5	6	3	0	0	0	0	0	0	0	0	0	0	0	0	0	0	0	0	0	0	0.22612	0	0	0	0	0	0	0	0	0	0	0	0	0.429836	0	0	0	0.227166	0	0.33668	0	0
chr1_19356635_19357563_-	ENSG00000077549.17	CAPZB	chr1	19356635	19357563	-	ENST00000375142.5	6	5	0.483388	0	0	0.673104	0.224177	0.513773	0	0	0	0	0.503213	0	0	0.355576	0	0	0.263939	0	0	0	0	0	0	0	0	0	1.18815	0.176584	0	0	0	0	0	0	0	0.355187	0	0	1.47919	0
chr1_19344358_19419750_-	ENSG00000077549.17	CAPZB	chr1	19344358	19419750	-	ENST00000375142.5	8	2	0	0	0	0	0	0	0	0	0	0	0	0	0	0.168313	0	0	0	0	0	0	0	0	0	0	0	0	0	0	0	0	0	0	0	0	0	0	0	0	0	0
chr1_19344358_19385626_-	ENSG00000077549.17	CAPZB	chr1	19344358	19385626	-	ENST00000375142.5	8	3	0	0	0	0	0	0	0	0	0	0	0	0	0	0.168313	0	0	0	0	0	0	0	0	0	0	0	0	0	0	0	0	0	0	0	0	0	0	0	0	0	0
chr1_19344358_19357563_-	ENSG00000077549.17	CAPZB	chr1	19344358	19357563	-	ENST00000375142.5	8	5	0	0	0	0	0.311608	0	0	0	0	0	0	0	0	0	0.241586	0	0	0	1.20117	0	0	0	0	0	0	0	0	0.176584	0.297656	0.280616	0	0	0	0	0	0	0	0	0	0
chr1_15518110_15518395_-	ENSG00000132906.17	CASP9	chr1	15518110	15518395	-	ENST00000333868.9	2	2	0.270788	0	0.494341	0	0	0	0	0	0	0	0	0	0	0.168313	0	0	0.70762	0	0	0	0	0.374669	0	0	0	0	0	0	0	0	0	0	0	0.188509	0	0	0	0.33668	0	0
chr1_15493892_15495452_-	ENSG00000132906.17	CASP9	chr1	15493892	15495452	-	ENST00000333868.9	8	7	0	0	0	0	0	0	0	0	0	0	0	0	0	0	0.241586	0	0	0	0	0	0	0.187335	0	0	0	0	0.298068	0	0	0	0	0	0	0	0	0	0	0.183442	0	0
chr1_10705492_10760857_-	ENSG00000130940.14	CASZ1	chr1	10705492	10760857	-	ENST00000377022.7	3	2	0	0	0	0	0	0	0	0	0	0	0	0	0	0	0	0	0	0	0	0	0	0	0	0	0	0	0	0	0	0	0	0	0	0	0	0	0	0	0	0
chr1_10693874_10760857_-	ENSG00000130940.14	CASZ1	chr1	10693874	10760857	-	ENST00000377022.7	4	2	0	0	0	0	0.311608	0	0	0	0	0	0	0	0	0	0	0	0	0	0	0	0	0	0	0	0	0	0	0	0	0	0	0	0	0	0	0	0	0	0	0
chr1_10658508_10660536_-	ENSG00000130940.14	CASZ1	chr1	10658508	10660536	-	ENST00000377022.7	7	6	0	0	0	0	0.401187	0	0	0	0	0	0	0	0	0	0	0	0	0	0	0	0	0	0	0	0	0	0	0	0	0	0	0	0	0	0	0	0	0	0	0
chr1_52359027_52360233_-	ENSG00000154222.14	CC2D1B	chr1	52359027	52360233	-	ENST00000284376.7	11	7	0	0	0	0	0	0	0	0	0	0	0	0	0	0	0	0	0	0	0	0	0	0	0	0	0	0	0	0	0	0	0	0	0	0	0	0	0	0	0	0
chr1_52357526_52361132_-	ENSG00000154222.14	CC2D1B	chr1	52357526	52361132	-	ENST00000284376.7	15	5	0	0	0	0	0	0	0	0	0	0	0	0	0	0	0	0	0	0	0	0	0	0	0	0	0.692705	0	0	0	0	0	0	0	0	0	0	0	0	0	0	0
chr1_52357526_52357898_-	ENSG00000154222.14	CC2D1B	chr1	52357526	52357898	-	ENST00000284376.7	15	14	0	0	0	0	0	0	0	0	0	0	0	0	0	0	0	0	0	0	0	0	0	0	0	0	0	0	0	0	0	0	0	0	0	0	0	0	0	0	0	0
chr1_52357526_52357698_-	ENSG00000154222.14	CC2D1B	chr1	52357526	52357698	-	ENST00000284376.7	15	15	0	0	0	0	0	0	0	0	0	0	0	0	0	0	0	0	0	0	0	0	0	0	0	0	0	0.468839	0	0	0	0	0	0	0	0	0	0	0	0	0	0
chr1_52356186_52361132_-	ENSG00000154222.14	CC2D1B	chr1	52356186	52361132	-	ENST00000284376.7	18	5	0	0	0	0	0.311608	0	0	0	0	0	0	0	0	0	0	0	0	0	0	0	0	0.170444	0	0	0	0	0	0.176584	0	0	0	0	0	0	0	0	0	0	0	0
chr1_52354608_52356442_-	ENSG00000154222.14	CC2D1B	chr1	52354608	52356442	-	ENST00000284376.7	23	17	0	0	0	0	0	0	0	0	0	0	0	0	0	0	0	0	0	0	0	0	0	0	0	0	0	0	0	0	0.352232	0	0	0	0	0	0	0	0	0	0	0
chr1_52357526_52357916_-	ENSG00000154222.14	CC2D1B	chr1	52357526	52357916	-	ENST00000371586.6	15	14	0	0	0	0	0	0	0	0	0	0	0	0	0	0	0	0	0	0	0	0	0	0	0	0	0	0	0.594077	0	0	0	0	0	0	0	0	0	0	0	0	0
chr1_88943005_88988351_-	ENSG00000137944.17	CCBL2	chr1	88943005	88988351	-	ENST00000260508.8	13	2	0.541577	0	0	0	0	0	0	0	0	0	0	0	0	0	0	0	0	0	0	0	0	0	0	0	0	0	0	0	0	0	0	0	0	0	0	0	0	0	0	0
chr1_88964829_88968814_-	ENSG00000137944.17	CCBL2	chr1	88964829	88968814	-	ENST00000446900.6	4	3	0.263777	0	0	0	0	0	0	0	0	0	0	0	0	0	0	0	0	0	0	0	0	0	0	0	0	0	0	0	0	0	0	0	0	0	0	0	0	0	0	0
chr1_88961167_88969467_-	ENSG00000137944.17	CCBL2	chr1	88961167	88969467	-	ENST00000446900.6	8	2	0	0	0	0	0	0	0	0	0	0	0	0	0	0	0	0	0.273746	0	0	0	0	0	0	0	0	0	0	0	0	0	0	0	0	0	0	0	0	0	0	0
chr1_88949091_88969467_-	ENSG00000137944.17	CCBL2	chr1	88949091	88969467	-	ENST00000446900.6	11	2	0	0	0.494341	0	0	0	0	0.22942	0	0	0	0	0	0	0	0	0	0	0	0	0	0	0	0	0	0	0	0	0	0	0	0	0	0	0	0	0	0	0	0
chr1_88949091_88955225_-	ENSG00000137944.17	CCBL2	chr1	88949091	88955225	-	ENST00000446900.6	11	9	0	0	0	0	0	0	0	0	0	0	0	0	0	0.168313	0	0	0	0.422015	0	0	0	0	0	0	0	0	0	0	0	0	0.547682	0	0	0.523879	0	0	0	0	0	0
chr1_88949091_88953152_-	ENSG00000137944.17	CCBL2	chr1	88949091	88953152	-	ENST00000446900.6	11	10	0	0	0	0	0	0	0	0	0	0	0	0	0	0	0.483172	0	0	0	0	0	0	0	0	0	0	0	0	0	0	0	0	0	0	0	0	0	0	0	0	0
chr1_88943005_88962145_-	ENSG00000137944.17	CCBL2	chr1	88943005	88962145	-	ENST00000446900.6	13	6	0	0	0	0	0	0	0	0	0	0	0	0	0	0	0	0	0	0	0	0	0	0	0	0	0	0	0	0	0	0	0	0	0	0	0	0	0	0	0	0
chr1_88943005_88955225_-	ENSG00000137944.17	CCBL2	chr1	88943005	88955225	-	ENST00000446900.6	13	9	0	0	0	0	0	0	0	0	0	0	0	0	0	0.168313	0	0	0	0	0	0	0	0	0	0	0	0	0	0	0.297656	0	0	0	0	0	0	0	0	0	0	0
chr1_88943005_88953152_-	ENSG00000137944.17	CCBL2	chr1	88943005	88953152	-	ENST00000446900.6	13	10	0	0	0	0	0	0	0	0	0	0	0	0	0	0	0	0	0	0	0	0	0	0	0	0	0	0.864969	0	0	0	0	0	0	0	0	0	0	0	0	0	0
chr1_45620528_45620833_-	ENSG00000159588.14	CCDC17	chr1	45620528	45620833	-	ENST00000479529.2	11	11	0	0	0	0	0	0	0	0	0	0	0	0	0	0	0	0	0	0	0	0	0	0	0	0	0	0	0	0	0	0	0	0	0	0	0	0	0	0	0	0
chr1_93183360_93184146_+	ENSG00000122483.17	CCDC18	chr1	93183360	93184146	+	ENST00000343253.11	2	3	0	0	0	0	0	0.256886	0	0	0	0	0	0	0	0	0	0	0	0	0	0	0	0	0	0	0	0	0	0	0	0	0	0	0	0	0	0	0	0	0	0
chr1_93183360_93186503_+	ENSG00000122483.17	CCDC18	chr1	93183360	93186503	+	ENST00000343253.11	2	4	0	0	0	0	0	0	0	0	0	0	0.800889	0	0	0	0	0	0	0	0	0	0	0	0	0	0	0	0	0	0	0	0	0	0	0	0	0	0	0	0	0
chr1_93183360_93192106_+	ENSG00000122483.17	CCDC18	chr1	93183360	93192106	+	ENST00000343253.11	2	5	0	0	0	0	0.224177	0	0.255961	0	0.594723	0	0	0	0	0	0	0	0	0	0	0.228857	0.479282	0	0	0	0	0	0	0	0	0	0	0	0	0	0	0	0	0.33668	0	0
chr1_93183360_93193744_+	ENSG00000122483.17	CCDC18	chr1	93183360	93193744	+	ENST00000343253.11	2	6	0.263777	0.343846	0	0	0	0.217621	0	0	1.06822	0	0.286956	0.481881	0	0	0.241586	0.302829	0.35381	0	0	0.252769	0.262044	0	0	0.798098	0	0.645973	0	0.504184	0	0	0	0.298654	0.341285	0.261939	0	0.582353	0.560161	0.33668	0	0
chr1_93183360_93201988_+	ENSG00000122483.17	CCDC18	chr1	93183360	93201988	+	ENST00000343253.11	2	7	0	0	0	0	0	0	0	0	0.281873	0	0	0	0	0	0	0	0	0	0	0	0	0	0	0	0	0.468839	0	0	0	0	0	0	0	0	0	0	0	0	0	0
chr1_93183360_93207398_+	ENSG00000122483.17	CCDC18	chr1	93183360	93207398	+	ENST00000343253.11	2	9	0	0	0.406021	0.604644	0	0.435243	0	0.276959	0.861778	0	0	0	0	0	0	0	0	0	0.22612	0	0	0	0	0.399049	0	0	0	0	0	0	0	0	0	0.188509	0.257402	0	0	0	0	0
chr1_93183360_93210926_+	ENSG00000122483.17	CCDC18	chr1	93183360	93210926	+	ENST00000343253.11	2	10	0	0	0.494341	0	0	0	0	0	0	0	0.860867	0.481881	0	0	0	0	0.263939	0	0	0	0.479282	0	1.24335	0	0	0	0	0	0.297656	0	0.279556	0.252936	0	0	0	0	0	0	0	0
chr1_93183360_93212261_+	ENSG00000122483.17	CCDC18	chr1	93183360	93212261	+	ENST00000343253.11	2	11	0	0	0	0	0	0	0	0	0	0	0	0	0	0	0	0	0	0	0	0	0	0	0	0	0	0	0.297039	0	0	0	0	0	0	0	0	0	0	0	0	0
chr1_93183360_93214966_+	ENSG00000122483.17	CCDC18	chr1	93183360	93214966	+	ENST00000343253.11	2	12	0	0	0	0	0	0	0	0	0.594723	0	0	0	0	0	1.11825	0	0	0	0	0	0	0	0	0.584256	0	0	0	0	0	0	0	0	0	0.340425	0	0	0	0	0	4.06403
chr1_93183360_93216746_+	ENSG00000122483.17	CCDC18	chr1	93183360	93216746	+	ENST00000343253.11	2	13	0.263777	0.306634	0	0	0	0.217621	0	0.22942	0	1.2586	0	0	0	0	0	0	0.627556	1.16873	1.1306	0	0	0	0	0.823132	0	0	0	0.533761	0.352232	0	0	0.597308	0	0	0.239396	0.216034	0.267418	0	0	0
chr1_93183360_93217869_+	ENSG00000122483.17	CCDC18	chr1	93183360	93217869	+	ENST00000343253.11	2	14	0	0	0	0	0	0	0	0	0	0	0	0	0	0	0	0	0	0	0.22612	0	0	0	0	0	0	0	0	0	0	0	0	0.298654	0	0	0.27011	0	0	0	0.567498	0
chr1_93183360_93221936_+	ENSG00000122483.17	CCDC18	chr1	93183360	93221936	+	ENST00000343253.11	2	16	0	0	0	0	0	0	0	0	0	0	0	0	0	0	0	0	0	0	0	0	0	0.187335	0	0	0	0	0	0	0	0	0	0.298654	0	0	0	0	0	0	0.344189	0
chr1_93183360_93226449_+	ENSG00000122483.17	CCDC18	chr1	93183360	93226449	+	ENST00000343253.11	2	17	0.527554	0	0	0	0	0	0	0.22942	0	1.70938	0.400444	0	0	0.186709	1.0423	0	0.547492	0.714196	0	0.228857	0	0	0.276394	0.424084	0	0	0	0	0.561837	0	0.279556	0.505871	0.88059	0.188509	0	0.355187	0	0.50502	0.719152	0
chr1_93183360_93232593_+	ENSG00000122483.17	CCDC18	chr1	93183360	93232593	+	ENST00000343253.11	2	18	0	0	0.406021	0.604644	0	0.217621	0	0	0.267055	0.547384	0	0.757641	0	0	0	0	0	0.422015	0	0	0	0.170444	0	0	0	0	0	0	0	0	0	0.551589	0	0	0.239396	0	0	0	0	0
chr1_93183360_93236390_+	ENSG00000122483.17	CCDC18	chr1	93183360	93236390	+	ENST00000343253.11	2	19	0	0	0	0	0	0	0	0	0	0	0	0	0	0	0	0	0	0	0	0	0	0	0	0	0	0	0	0	0	0	0	0	0	0	0	0	0	0	0	0
chr1_93183360_93239896_+	ENSG00000122483.17	CCDC18	chr1	93183360	93239896	+	ENST00000343253.11	2	21	0	0	0	1.20929	0	0	0	0	0	0	0	0	0	0.373972	0.241586	0	1.06143	0	0	0	0	0	0	0	0	0	0	0.176584	0	0	0	0.429836	0	0.377018	0	0	0	0	0	0.364473
chr1_93183360_93246954_+	ENSG00000122483.17	CCDC18	chr1	93183360	93246954	+	ENST00000343253.11	2	23	0.263777	0	0	0	0	0	0	0	0	0	0	0	0	0	0	0	0	0	0	0	0	0	0	0	0.692705	0	0	0	0	0	0	0	0	0	0	0.227166	0	0	0	0
chr1_93183360_93256538_+	ENSG00000122483.17	CCDC18	chr1	93183360	93256538	+	ENST00000343253.11	2	25	0	0	0	0	0	0	0	0	0	0	0	0	0	0	0	0	0.263939	0	0	0	0	0	0	0	0	0	0	0	0.561837	0	0	0	0	0	0	0	0	0	0	0
chr1_93183360_93258885_+	ENSG00000122483.17	CCDC18	chr1	93183360	93258885	+	ENST00000343253.11	2	26	0.241694	0	0	0	0	0	0	0.414318	0.876596	0	0	0	0	0	0	0	0	0	0.22612	0	0	0	0	0	0	0	0.297039	0	0	0	0	0	0	0.340425	0	0	0	0.676028	0	0
chr1_93183360_93264901_+	ENSG00000122483.17	CCDC18	chr1	93183360	93264901	+	ENST00000343253.11	2	27	0	0	0	0	0	0.435243	0	0	0.594723	0	0.251606	0	0	0	1.11825	0.605658	0.273746	0.292181	0.520094	0.276051	0	0	0.276394	2.4694	0	0	0	0	0	0	0.547682	0.551589	0	0	0	0	0	0	0	0.364473
chr1_93183360_93270814_+	ENSG00000122483.17	CCDC18	chr1	93183360	93270814	+	ENST00000343253.11	2	28	0	0	0	0	0	0	0.320729	0	0	0	0	0.438693	0	0	0	0	0	0	0	0	0	0	0	0	0	0	0	0	0	0	0	0	0	0	0	0	0	0	0	0
chr1_93183978_93207398_+	ENSG00000122483.17	CCDC18	chr1	93183978	93207398	+	ENST00000343253.11	3	9	0	0	0	0	0	0	0	0	0	0	0	0	0	0	0	0	0	0	0	0	0	0	0	0	0	0	0	0	0	0	0	0	0	0	0	0	0	0	0	0
chr1_93183978_93258885_+	ENSG00000122483.17	CCDC18	chr1	93183978	93258885	+	ENST00000343253.11	3	26	0	0	0	0	0	0	0	0	0	0	0	0	0	0	0	0	0	0	0	0	0	0	0	0	0	0	0	0	0	0	0	0	0	0	0	0	0	0	0	0
chr1_93186345_93193744_+	ENSG00000122483.17	CCDC18	chr1	93186345	93193744	+	ENST00000343253.11	4	6	0	0	0	0	0	0	0	0	0	0	0	0	0.285577	0	0	0	0	0	0	0	0	0	0	0	0	0	0	0	0	0	0	0	0	0	0	0	0	0	0	0
chr1_93186345_93201988_+	ENSG00000122483.17	CCDC18	chr1	93186345	93201988	+	ENST00000343253.11	4	7	0	0	0	0	0	0	0	0	0	0	0	0	0	0	0	0	0	0	0	0	0	0	0	0	0	0	0	0	0.352232	0	0	0	0	0	0	0	0	0	0	0
chr1_93186345_93207398_+	ENSG00000122483.17	CCDC18	chr1	93186345	93207398	+	ENST00000343253.11	4	9	0	0	0	0	0	0.217621	0	0	0	0	0.286956	0	0	0	0	0	0	0	0	0	0	0	0	0.424084	0	0	0	0	0	0	0	0.429836	0	0	0	0	0	0	0	0
chr1_93186345_93210926_+	ENSG00000122483.17	CCDC18	chr1	93186345	93210926	+	ENST00000343253.11	4	10	0	0	0	0	0	0	0	0	0	0	0	0	0	0	0	0	0	0	0	0	0	0	0	0	0	0	0	0	0	0	0	0	0	0	0	0.355187	0	0	0	0
chr1_93186345_93214966_+	ENSG00000122483.17	CCDC18	chr1	93186345	93214966	+	ENST00000343253.11	4	12	0	0	0	0	0	0	0	0	0	0	0	0	0	0	0	0.302829	0	0	0	0	0	0	0	0	0	0	0	0	0	0	0	0	0	0	0	0	0	0	0	0
chr1_93186345_93221936_+	ENSG00000122483.17	CCDC18	chr1	93186345	93221936	+	ENST00000343253.11	4	16	0	0	0	0	0	0	0	0	0.281873	0	0	0	0	0	0	0	0	0	0	0	0	0	0	0.399049	0	0	0	0	0	0	0	0	0	0	0	0	0.292743	0	0.567498	0
chr1_93186345_93226449_+	ENSG00000122483.17	CCDC18	chr1	93186345	93226449	+	ENST00000343253.11	4	17	0	0	0	0	0	0	0	0	0	0	0	0	0	0	0	0	0	0	0	0	0	0	0	0	0	0	0	0	0	0	0	0	0	0	0	0	0	0.16834	0	0
chr1_93186345_93232593_+	ENSG00000122483.17	CCDC18	chr1	93186345	93232593	+	ENST00000343253.11	4	18	0	0	0	0	0	0	0	0	0	0	0	0	0	0	0	0	0	0	0	0	0	0	0	0	0.583509	0	0	0	0	0	0	0	0	0	0	0	0	0	0	0
chr1_93186345_93236390_+	ENSG00000122483.17	CCDC18	chr1	93186345	93236390	+	ENST00000343253.11	4	19	0	0	0	0	0	0	0	0	0	0	0	0	0	0	0	0	0	0	0	0	0	0	0	0	0	0	0	0	0	0	0	0	0	0	0	0	0	0	0	0
chr1_93186345_93239896_+	ENSG00000122483.17	CCDC18	chr1	93186345	93239896	+	ENST00000343253.11	4	21	0	0	0	0	0	0	0	0	0	0	0	0	0	0	0	0	0	0	0	0	0	0	0	0	0	0	0	0.26688	0	0	0	0	0	0.340425	0	0	0	0	0	0
chr1_93186345_93258885_+	ENSG00000122483.17	CCDC18	chr1	93186345	93258885	+	ENST00000343253.11	4	26	0	0	0	0	0	0	0	0	0	0	0	0	0	0	0	0.291251	0	0	0	0	0	0	0	0	0	0	0	0	0	0	0	0	0	0	0	0	0	0	0	0
chr1_93186345_93264901_+	ENSG00000122483.17	CCDC18	chr1	93186345	93264901	+	ENST00000343253.11	4	27	0	0	0	0	0	0	0	0	0	0	0	0	0	0	0	0	0	0	0	0	0	0	0	0	0	0	0	0	0	0	0	0	0	0	0	0	0	0	0	0
chr1_93192000_93193744_+	ENSG00000122483.17	CCDC18	chr1	93192000	93193744	+	ENST00000343253.11	5	6	0	0	0	0	0	0	0	0	0	0	0	0	0	0	0	0	0	0	0	0	0	0	0	0	0	0	0	0	0	0	0	0	0	0	0	0	0	0.16834	0	0
chr1_93192000_93207398_+	ENSG00000122483.17	CCDC18	chr1	93192000	93207398	+	ENST00000343253.11	5	9	0.241694	0	0	0	0.401187	0	0	0	0.594723	0	0	0	0	0	0	0	0	0	0	0	0	0	0	0	0	0	0	0	0	0	0.547682	0	0	0.523879	0	0.227166	0	0	0	0
chr1_93192000_93216746_+	ENSG00000122483.17	CCDC18	chr1	93192000	93216746	+	ENST00000343253.11	5	13	0	0	0	0	0	0	0	0	0	0	0	0	0	0	0	0	0	0	0	0	0	0	0	0	0	0	0	0	0.561837	0	0	0	0	0	0	0	0	0	0	0
chr1_93192000_93221936_+	ENSG00000122483.17	CCDC18	chr1	93192000	93221936	+	ENST00000343253.11	5	16	0	0	0	0	0	0	0	0	0	0	0	0	0	0	0	0	0	0	0	0	0	0	0	0	0	0	0	0	0	0	0	0	0	0	0	0.216034	0	0	0	0
chr1_93192000_93226449_+	ENSG00000122483.17	CCDC18	chr1	93192000	93226449	+	ENST00000343253.11	5	17	0	0	0	0	0	0	0	0	0	0	0	0	0	0	0	0	0	0	0	0	0	0	0	0	0	0	0	0	0	0	0.279556	0	0	0	0	0	0	0	0	0
chr1_93192000_93232593_+	ENSG00000122483.17	CCDC18	chr1	93192000	93232593	+	ENST00000343253.11	5	18	0	0	0	0	0.224177	0	0	0	0	0	0	0	0	0.186709	0	0	0	0	0.291262	0	0	0	0	0	0	0	0	0	0	0	0	0.298654	0	0	0	0	0	0	0	0
chr1_93201892_93207398_+	ENSG00000122483.17	CCDC18	chr1	93201892	93207398	+	ENST00000343253.11	7	9	0	0	0	0	0	0	0	0	0	0	0	0	0	0.186709	0	0	0	0	0	0	0	0	0	0	0	0	0	0	0	0	0	0	0	0	0	0	0	0	0	0
chr1_93201892_93226449_+	ENSG00000122483.17	CCDC18	chr1	93201892	93226449	+	ENST00000343253.11	7	17	0	0	0	0	0	0	0	0	0	0	0	0	0	0	0.558285	0	0	0	0	0	0	0	0	0	0	0	0	0	0	0	0	0	0	0	0	0	0	0	0	0
chr1_93205510_93226449_+	ENSG00000122483.17	CCDC18	chr1	93205510	93226449	+	ENST00000343253.11	8	17	0	0	0	0	0	0	0	0	0	0	0	0	0	0	0	0	0	0	0	0	0	0	0.310838	0	0	0	0	0	0	0	0	0	0	0	0	0	0	0	0	0
chr1_93205510_93232593_+	ENSG00000122483.17	CCDC18	chr1	93205510	93232593	+	ENST00000343253.11	8	18	0	0	0	0	0	0	0	0	0	0	0	0	0	0	0	0	0	0	0	0	0	0	0	0	0	0	0	0	0	0	0	0	0	0	0	0	0	0	0	0
chr1_93205510_93239896_+	ENSG00000122483.17	CCDC18	chr1	93205510	93239896	+	ENST00000343253.11	8	21	0	0	0	0	0	0	0	0	0	0	0	0	0	0	0	0	0	0	0	0	0	0	0	0	0	0	0	0.176584	0	0	0	0	0	0	0	0	0	0	0	0
chr1_93205510_93264901_+	ENSG00000122483.17	CCDC18	chr1	93205510	93264901	+	ENST00000343253.11	8	27	0	0	0	0	0	0	0	0	0	0	0	0	0	0.187263	0	0	0	0	0	0	0	0	0	0	0	0	0	0	0	0	0	0	0	0	0	0	0	0	0	0
chr1_93207107_93210926_+	ENSG00000122483.17	CCDC18	chr1	93207107	93210926	+	ENST00000343253.11	9	10	0	0	0	0	0	0	0	0	0	0	0	0	0	0	0	0	0	0	0	0	0	0	0	0	0	0	0	0	0	0	0	0	0	0	0	0	0	0	0	0
chr1_93207107_93214966_+	ENSG00000122483.17	CCDC18	chr1	93207107	93214966	+	ENST00000343253.11	9	12	0	0	0	0	0	0	0	0	0	0	0	0	0	0	0	0	0	0	0.22612	0	0	0	0	0	0	0	0	0	0	0	0	0	0	0	0	0	0	0	0	0
chr1_93207107_93226449_+	ENSG00000122483.17	CCDC18	chr1	93207107	93226449	+	ENST00000343253.11	9	17	0	0	0	0	0	0	0	0	0	0	0	0	0.345927	0	0	0	0	0	0	0	0	0	0	0	0	0	0	0	0	0	0	0	0	0	0	0	0	0	0	0
chr1_93207107_93232593_+	ENSG00000122483.17	CCDC18	chr1	93207107	93232593	+	ENST00000343253.11	9	18	0	0	0	0	0	0	0	0	0	0	0	0	0	0	0	0	0	0	0	0	0	0	0	0	0	0	0	0	0	0.250246	0	0	0	0.188509	0	0	0	0	0	0
chr1_93207107_93258885_+	ENSG00000122483.17	CCDC18	chr1	93207107	93258885	+	ENST00000343253.11	9	26	0	0	0	0	0	0	0	0.45884	0	0	0	0	0	0	0	0	0	0	0	0	0	0	0	0	0	0	0	0	0	0	0	0	0	0	0	0	0	0	0	0
chr1_93207107_93264901_+	ENSG00000122483.17	CCDC18	chr1	93207107	93264901	+	ENST00000343253.11	9	27	0	0	0	0	0	0	0.255961	0	0	0	0	0	0	0	0	0	0	0	0	0	0	0	0	0	0	0	0	0	0	0	0	0	0	0	0	0	0	0	0	0
chr1_93210802_93212261_+	ENSG00000122483.17	CCDC18	chr1	93210802	93212261	+	ENST00000343253.11	10	11	0	0	0	0	0	0	0	0	0	0	0	0	0	0	0	0	0	0	0	0	0	0	0	0.424084	0	0	0	0	0	0	0	0	0	0.377018	0	0	0	0	0	0
chr1_93210802_93214966_+	ENSG00000122483.17	CCDC18	chr1	93210802	93214966	+	ENST00000343253.11	10	12	0	0	0	0	0	0.217621	0	0	0.594723	0	0	0.24094	0	0.355022	0.316699	0	0	0.84403	0.291262	0	0	0.246697	0	0.399049	0	0	0	0	1.77356	0	0.279556	0	0.225925	0.523879	0	0	0.292743	0	0	0
chr1_93210802_93216746_+	ENSG00000122483.17	CCDC18	chr1	93210802	93216746	+	ENST00000343253.11	10	13	2.52631	0	0.326655	0	0.802374	1.46279	0.536854	0.276959	8.06114	0.581	1.07712	0	0	0.373972	0.633398	0	0	0.292181	0.452239	1.03436	0.714001	0.246697	0	0.399049	0	0	0	0.533761	0.704464	0.229511	0	0	0.341285	0.717444	3.62375	0.864135	0	0.183442	1.28665	0
chr1_93210802_93217869_+	ENSG00000122483.17	CCDC18	chr1	93210802	93217869	+	ENST00000343253.11	10	14	0	0	0	0	0	0	0	0	0.876596	0	0	0	0	0	0	0	0.263939	0	0	0	0.262044	0.562004	0	0	0	0	0	0	0	0	0	0	0	0	0	0.710375	0	0	0	0
chr1_93210802_93221743_+	ENSG00000122483.17	CCDC18	chr1	93210802	93221743	+	ENST00000343253.11	10	15	0	0	0	0	0	0	0	0	0	0	0	0	0	0	0	0	0	0	0	0	0	0	0	0	0	0	0	0	0	0	0	0	0	0	0	0	0	0	0.359576	0
chr1_93210802_93221936_+	ENSG00000122483.17	CCDC18	chr1	93210802	93221936	+	ENST00000343253.11	10	16	0	0	0	0	0	0	0	0	0	0.547384	0	0	0	0	0	0	0	0	0	0	0	0	0	0	0	0	0	0	0	0	0	0	0	0	0	0	0	0	0	1.01224
chr1_93210802_93226449_+	ENSG00000122483.17	CCDC18	chr1	93210802	93226449	+	ENST00000343253.11	10	17	0	0	0	0.673104	0	0	0	0	0	0	0	0	0	0.187263	0	0	0	0	0	0	0	0.374669	0	0	0	0	0	0	0	0	0	0	0	0.261939	0	0	0	0.338014	0	0
chr1_93210802_93232593_+	ENSG00000122483.17	CCDC18	chr1	93210802	93232593	+	ENST00000343253.11	10	18	0.769248	0.343846	0	0	0.712794	1.37675	0	0	0	0.547384	0.251606	0	0	0.186709	0	0	0	0	0.228832	0.552102	0	0	0.331496	0	0.692705	0	0	0	0	0.229511	0.547682	0	0	0.754037	0.766908	0	0.292743	0	0	1.01224
chr1_93210802_93239896_+	ENSG00000122483.17	CCDC18	chr1	93210802	93239896	+	ENST00000343253.11	10	21	0	0	0	0	0	0.776948	0	0	1.78417	0	0	0	0	0	0	0	0	0	0	0.228857	0	0	0	2.97177	0	0.432484	0	0	0.297656	0	0	0.429836	0	0.188509	0	0	0	0	0	0.364473
chr1_93210802_93246954_+	ENSG00000122483.17	CCDC18	chr1	93210802	93246954	+	ENST00000343253.11	10	23	0	0	0	0	0	0	0	0	0	0	0	0	0	0	0	0	0	0	0	0	0	0	0	0.399049	0	0	0	0	0.704464	0	0	0	0	0	0	0	0	0	0	0
chr1_93210802_93258885_+	ENSG00000122483.17	CCDC18	chr1	93210802	93258885	+	ENST00000343253.11	10	26	0	0	0	0	0	0	0	0	0	0	0	0	0	0	0	0	0	0.422015	0	0	0	0	0	0	0	0	0	0	0	0	0	0	0	0	0	0	0	0	0	0
chr1_93210802_93264901_+	ENSG00000122483.17	CCDC18	chr1	93210802	93264901	+	ENST00000343253.11	10	27	0	0	0	0	0	0	0	0	0	0	0	0	0	0	0	0	0	0	0	0	0	0	0	0	0	0	0	0	0	0	0	0	0	0	0	0	0	0	0	0
chr1_93212101_93214966_+	ENSG00000122483.17	CCDC18	chr1	93212101	93214966	+	ENST00000343253.11	11	12	0	0	0	0	0	0	0	0	1.06822	0	0.400444	0.24094	0	0	0	0	0.70762	0	0	0	0	0	0	0	0	0	0.496832	0	0	0	0	0	0.225925	0	0	0	0	0	0	0
chr1_93212101_93216746_+	ENSG00000122483.17	CCDC18	chr1	93212101	93216746	+	ENST00000343253.11	11	13	0	0	0.988682	0	0.849541	0.949016	0.216125	0	3.21948	0.547384	0	0.318948	0	0	0.79987	0.302829	0.263939	0.422015	2.37164	0.939342	0.234719	0.187335	0.276394	1.69633	0	0	0	0	0.297656	0	0.838668	0	0	1.31475	0.718189	0	0.292743	0	0.359576	0.364473
chr1_93212101_93217869_+	ENSG00000122483.17	CCDC18	chr1	93212101	93217869	+	ENST00000343253.11	11	14	0	0.687692	0	0	0	0	0	0	0	0	0	0	0	0	0.874983	0	0	0	0	0	0	0.417141	0	0	0	0	0	0.26688	0	0	0	0.252936	0	0	0	0.227166	0.534836	0	0.344189	0
chr1_93212101_93221936_+	ENSG00000122483.17	CCDC18	chr1	93212101	93221936	+	ENST00000343253.11	11	16	0	0	0	0	0	0	0	0.783339	0.53411	0	0	0	0	0.374527	0	0	0.273746	0	0	0	0	0	0	0.876384	0	0	0.496832	0.533761	0	0	0	0	0	0.340425	0	0	0	0	0	0
chr1_93212101_93226449_+	ENSG00000122483.17	CCDC18	chr1	93212101	93226449	+	ENST00000343253.11	11	17	0	0	0.326655	0	0	0.652864	0.320729	0	0	0	0	0.438693	0.345927	0	0	0	0	0.292181	0	0.252769	0	0.340888	0	1.30047	0	0	0	0	0	0	0	0.252936	0	0	0	0.216034	0	0	0	0
chr1_93212101_93232593_+	ENSG00000122483.17	CCDC18	chr1	93212101	93232593	+	ENST00000343253.11	11	18	0	0	0	0	0.623215	0.606096	0	0.691278	0	0.547384	0	0.318948	0	0.374527	0.241586	0	0.263939	0	0.904479	0.252769	0.496763	0	0	1.62123	0	0	0.298068	0.176584	0.352232	1.31197	0	0	0.677776	0	1.28701	0	0	0.338014	0.688377	0
chr1_93212101_93239896_+	ENSG00000122483.17	CCDC18	chr1	93212101	93239896	+	ENST00000343253.11	11	21	0	0	0	0	0	0	0	0	0	0	0	0	0	0	0	0	0	0	0	0	0	0.170444	0	0	0	0	0	0	0	0	0	0	0	0	0	0	0	0	0	0
chr1_93212101_93264901_+	ENSG00000122483.17	CCDC18	chr1	93212101	93264901	+	ENST00000343253.11	11	27	0	0	0	0	0	0	0	0	0	0	0	0	0	0	0	0	0	0	0	0	0	0	0	0	0	0	0	0	0	0	0	0	0	0	0	0	0	0	0	0
chr1_93214746_93221936_+	ENSG00000122483.17	CCDC18	chr1	93214746	93221936	+	ENST00000343253.11	12	16	0	0	0	0	0	0	0.216125	0	0	0	0	0	0	0	0	0	0	0	0	0	0	0	0	0	0	0	0.496832	0	0	0	0	0.298654	0	0	0	0	0	0	0	0
chr1_93214746_93226449_+	ENSG00000122483.17	CCDC18	chr1	93214746	93226449	+	ENST00000343253.11	12	17	0	0	0	0	0	0	0	0	0	0	0	0	0	0	0	0	0	0	0	0	0	0	0	0	0	0	0	0	0	0	0	0	0	0	0	0	0	0	0	0
chr1_93214746_93232593_+	ENSG00000122483.17	CCDC18	chr1	93214746	93232593	+	ENST00000343253.11	12	18	0	0	0	0	0	0	0	0	0	0	0	0	0	0	0	0	0	0	0	0	0	0	0	0	0	0	0	0.3276	0.352232	0	0.279556	0	0	0	0	0	0	0	1.07873	0
chr1_93214746_93239896_+	ENSG00000122483.17	CCDC18	chr1	93214746	93239896	+	ENST00000343253.11	12	21	0	0	0	0	0	0	0	0	0	0	0	0	0	0	0	0	0	0	0.22612	0	0	0	0	0	0	0	0	0	0.352232	0	0	0	0	0	0	0	0	0	0	0
chr1_93214746_93246954_+	ENSG00000122483.17	CCDC18	chr1	93214746	93246954	+	ENST00000343253.11	12	23	0	0	0	0	0	0	0	0	0	0	0	0.24094	0	0	0	0	0	0	0	0	0	0	0	0	0	0	0	0	0	0	0	0	0	0.340425	0	0	0	0	0	0
chr1_93214746_93254614_+	ENSG00000122483.17	CCDC18	chr1	93214746	93254614	+	ENST00000343253.11	12	24	0	0	0	0	0	0	0	0	0	0	0	0	0	0	0	0	0	0	0	0	0	0	0	0	0	0	0	0	0	0	0	0	0	0.188509	0	0	0	0	0	0
chr1_93214746_93264901_+	ENSG00000122483.17	CCDC18	chr1	93214746	93264901	+	ENST00000343253.11	12	27	0	0	0	0	0	0	0	0	0	0	0	0	0	0	0	0	0	0	0	0	0	0	0	0	0	0	0	0	0	0	0	0	0	0	0	0	0	0	0	0
chr1_93216636_93226449_+	ENSG00000122483.17	CCDC18	chr1	93216636	93226449	+	ENST00000343253.11	13	17	0.270788	0	0	0	0	0	0	0	0	0	0	0	0	0	0	0	0	0	0	0	0	0	0	0	0	0	0	0	0	0	0	0	0	0	0	0	0	0	0	0
chr1_93216636_93258885_+	ENSG00000122483.17	CCDC18	chr1	93216636	93258885	+	ENST00000343253.11	13	26	0	0	0	0	0	0	0	0	0	0	0	0	0	0	0	0	0	0	0	0	0	0	0	0	0	0	0	0	0	0	0	0	0	0	0	0	0	0	0	0
chr1_93217738_93226449_+	ENSG00000122483.17	CCDC18	chr1	93217738	93226449	+	ENST00000343253.11	14	17	0	0.343846	0.406021	0	0	1.29072	0	0.22942	0.53411	1.12838	0.6874	0	0	0	0.483172	0.291251	1.50924	0	1.19845	0	0	0	0	0.399049	0	0	0	0	0.704464	0.229511	0	0	0.610937	0.450448	0	0.454332	0.267418	0.366884	0	0.506118
chr1_93217738_93232593_+	ENSG00000122483.17	CCDC18	chr1	93217738	93232593	+	ENST00000343253.11	14	18	0	0	0.326655	0	0.311608	0.256886	0	0.22942	0.281873	0	0	0.637895	0	0	0	0.302829	0.35381	0	0.452239	0	0	0	0	0.798098	0	0.322986	0.297039	0	0	0.229511	0	0.252936	0.269653	0.188509	0.27011	0	0	0	0	0
chr1_93217738_93239896_+	ENSG00000122483.17	CCDC18	chr1	93217738	93239896	+	ENST00000343253.11	14	21	0	0	0	0	0	0	0	0.22942	0	0	0	0	0	0	0	0	0	0	0	0	0	0	0	0	0	0	0	0	0	0	0	0	0.341285	0	0	0	0	0	0	0
chr1_93217738_93254614_+	ENSG00000122483.17	CCDC18	chr1	93217738	93254614	+	ENST00000343253.11	14	24	0	0	0	0	0	0	0	0	0	0	0	0	0	0	0	0	0.263939	0	0	0	0	0	0	0	0	0.645973	0	0	0	0	0	0	0	0	0	0	0	0.550325	0	0
chr1_93217738_93258885_+	ENSG00000122483.17	CCDC18	chr1	93217738	93258885	+	ENST00000343253.11	14	26	0	0	0	0	0.311608	0.388474	0	0	0	0	0	0	0	0	0	0	0	0	0	0	0	0	0	0	0	0	0	0	0	0	0	0	0.341285	0	0	0	0	0	0	0
chr1_93217738_93264901_+	ENSG00000122483.17	CCDC18	chr1	93217738	93264901	+	ENST00000343253.11	14	27	0	0	0	0	0	0.217621	0	0	0	0	0.573911	0	0	0.187263	0	0	0	0	0	0	0	0	0	0	0	0	0	0	0	0	0	0.429836	0	0	0	0.227166	0	0	0	0.506118
chr1_93221609_93221936_+	ENSG00000122483.17	CCDC18	chr1	93221609	93221936	+	ENST00000343253.11	15	16	0	0	0	0	0	0	0	0	0	0	0	0	0	0	0	0	0	0	0	0.228857	0	0	0	0	0	0	0.297039	0	0	0	0	0	0	0	0.27011	0	0.292743	0	0	0
chr1_93221609_93226449_+	ENSG00000122483.17	CCDC18	chr1	93221609	93226449	+	ENST00000343253.11	15	17	0	0	0	0	0.224177	0	0	0	0.53411	0	0	0	0	0	0	0	0.70762	0	0.22612	0	0	0	0	0.292128	0	0	0	0	0	0	0	0	0	0	0	0	0	0	0	0
chr1_93221609_93232593_+	ENSG00000122483.17	CCDC18	chr1	93221609	93232593	+	ENST00000343253.11	15	18	0	0	0	0	0	0	0	0.22942	0.594723	0	0	0	0	0	0	0	0.35381	0	0	0.528821	0	0	0	0.424084	0	0	0	0	0	0	0	0	0	0	0	0	0	0	0	0
chr1_93221609_93239896_+	ENSG00000122483.17	CCDC18	chr1	93221609	93239896	+	ENST00000343253.11	15	21	0	0	0	0	0	0.217621	0.320729	0	0.53411	0	0	0	0.345927	0	0	0	0	0	0	0	0	0	0	0	0	0	0	0	0	0	0	0	0.225925	0	0	0	0.267418	0	0	0
chr1_93221609_93246954_+	ENSG00000122483.17	CCDC18	chr1	93221609	93246954	+	ENST00000343253.11	15	23	0	0	0	0	0	0	0	0	0	0	0	0	0	0	0	0	0	0	0	0	0	0.170444	0	0	0	0	0	0	0	0	1.09536	0	0	0	0	0	0	0.16834	0	0
chr1_93221609_93254614_+	ENSG00000122483.17	CCDC18	chr1	93221609	93254614	+	ENST00000343253.11	15	24	0	0	0	0	0	0	0	0	0	0	0	0	0	0	0	0	0	0	0	0	0	0	0	0	0	0	0	0	0	0	0	0	0	0	0	0	0	0	0	0.364473
chr1_93221609_93258885_+	ENSG00000122483.17	CCDC18	chr1	93221609	93258885	+	ENST00000343253.11	15	26	0	0	0	0	0.448354	0	0	0	0	0	0	0	0	0	0	0	0	0	0	0	0	0	0	0.292128	0	0	0	0	0	0	0	0	0	0	0	0	0	0	0	0
chr1_93221609_93264901_+	ENSG00000122483.17	CCDC18	chr1	93221609	93264901	+	ENST00000343253.11	15	27	1.53044	6.36153	1.05933	1.95085	4.72773	1.03383	0.752979	1.74856	0.815984	0	1.08784	1.52365	0.285577	1.10186	24.0898	1.84096	0.263939	14.6089	2.5606	0.228857	0	3.0638	1.80301	2.6546	0.692705	4.92852	1.88581	1.89129	4.04198	0.459022	0.279556	9.03062	3.0451	0	0.810329	2.66234	0.827579	0	0.927074	1.59954
chr1_93226333_93232593_+	ENSG00000122483.17	CCDC18	chr1	93226333	93232593	+	ENST00000343253.11	17	18	0	0	0	0	0	0	0	0	0	0	0.286956	0.24094	0	0	0	0	0	0	0	0	0	0	0	0.292128	0	0	0	0	0	0.280616	0	0	0	0	0	0.227166	0.267418	0	0	0
chr1_93226333_93239896_+	ENSG00000122483.17	CCDC18	chr1	93226333	93239896	+	ENST00000343253.11	17	21	0	0	0	0	0	0	0	0	0	0	0	0	0	0	0	0	0	0	0	0	0	0	0	0	0	0	0	0	0	0	0	0	0	0	0	0	0	0	0.344189	0
chr1_93226333_93258885_+	ENSG00000122483.17	CCDC18	chr1	93226333	93258885	+	ENST00000343253.11	17	26	0	0	0	0	0	0	0	0	0	0	0	0	0.571154	0	0	0	0	0	0	0	0	0	0	0	0	0	0	0	0	0	0	0	0	0	0	0	0	0	0	0
chr1_93226333_93264901_+	ENSG00000122483.17	CCDC18	chr1	93226333	93264901	+	ENST00000343253.11	17	27	0	0	0	0	0	0	0	0.414318	0	0	0	0.637895	0	0	0	0	0	0	0	0	0	0	0	0	0	0	0	0	0	0	0	0	0	0	0	0	0	0	0	0
chr1_93232426_93246954_+	ENSG00000122483.17	CCDC18	chr1	93232426	93246954	+	ENST00000343253.11	18	23	0	0	0	0	0	0	0	0	0	0	0	0	0	0	0	0	0	0	0	0	0	0	0	0	0	0	0	0	0	0	0	0	0	0	0	0	0	0	0	0
chr1_93232426_93258885_+	ENSG00000122483.17	CCDC18	chr1	93232426	93258885	+	ENST00000343253.11	18	26	0	0	0	0	0	0	0	0	0	0	0	0	0	0	0	0	0	0.292181	0	0	0	0	0	0	0	0	0	0	0	0	0	0	0	0	0	0	0	0	0	0
chr1_93232426_93264901_+	ENSG00000122483.17	CCDC18	chr1	93232426	93264901	+	ENST00000343253.11	18	27	0	0	0	0	0	0	0	0	0	0	0	0	0	0	0	0	0	0	0	0	0	0	0	0	0	0	0	0	0	0.280616	0	0	0	0	0	0	0	0	0	0
chr1_93236248_93246954_+	ENSG00000122483.17	CCDC18	chr1	93236248	93246954	+	ENST00000343253.11	19	23	0	0	0	0	0	0	0	0	0	0	0	0.318948	0	0	0	0	0	0	0	0	0	0	0.310838	0.399049	0	0	0	0.3276	0.297656	0	0	0	0	0	0.257402	0	0	0	0	0
chr1_93236248_93254614_+	ENSG00000122483.17	CCDC18	chr1	93236248	93254614	+	ENST00000343253.11	19	24	0	0	0	0	0	0	0	0	0	0	0	0	0	0	0	0	0	0	0	0	0	0	0	0	0	0	0	0	0	0	0	0	0	0	0	0	0	0.50502	0	0
chr1_93236248_93264901_+	ENSG00000122483.17	CCDC18	chr1	93236248	93264901	+	ENST00000343253.11	19	27	0	0	0	0.673104	0	0	0	0	0	0	0	0	0	0	0.241586	0	0	0	0	0	0	0	0	0	0	0	0	0	0.352232	0	0	0	0	0	0	0	0	0	0	0
chr1_93239310_93239896_+	ENSG00000122483.17	CCDC18	chr1	93239310	93239896	+	ENST00000343253.11	20	21	0	0	0	0	0	0	0	0	0	0	0	0.318948	0	0	0	0	0	0.422015	0	0	0.479282	0	0	0	0	0	0	0	0	0.229511	0	0	0	0	0	0	0	0	0	0
chr1_93239310_93258885_+	ENSG00000122483.17	CCDC18	chr1	93239310	93258885	+	ENST00000343253.11	20	26	0	0	0	0	0	0	0	0	0.281873	0	0	0	0	0	0	0	0	0	0	0	0	0	0	0	0	0	0	0	0	0	0	0	0	0	0	0	0	0	0	0
chr1_93246105_93264901_+	ENSG00000122483.17	CCDC18	chr1	93246105	93264901	+	ENST00000343253.11	22	27	0	0	0	0	0	0	0	0	0	0	0	0	0	0.373972	0	0	0	0	0	0	0	0	0	0	0	0	0	0	0	0	0	0	0	0	0.257402	0	0	0	0	0
chr1_93254471_93258885_+	ENSG00000122483.17	CCDC18	chr1	93254471	93258885	+	ENST00000343253.11	24	26	0	0	0	0	0	0	0	0.414318	0	0	0	0	0	0	0	0	0	0	0	0	0	0	0	0.399049	0	0	0	0	0	0	0	0	0	0	0	0	0	0	0	0
chr1_93254471_93264901_+	ENSG00000122483.17	CCDC18	chr1	93254471	93264901	+	ENST00000343253.11	24	27	0	0	0	0	0	0.388474	0.432249	0	0	0	0	0	0	0	0	0	0	0	0	0	0	0	0	0	0	0	0	0	0	0	0	0	0	0	0	0	0	0	0	0
chr1_93256335_93258885_+	ENSG00000122483.17	CCDC18	chr1	93256335	93258885	+	ENST00000343253.11	25	26	0	0	0	0	0	0	0.216125	0	0	0	0	0	0	0	0	0	0	0	0	0.457715	0.524088	0	0	0	0	0	0	0	0	0	0	0	0	0	0	0	0	0	0.359576	0
chr1_93256335_93264901_+	ENSG00000122483.17	CCDC18	chr1	93256335	93264901	+	ENST00000343253.11	25	27	0	0	0	0	0	0	0	0	0	0	0	0	0	0	0	0	0	0	0	0	0.479282	0	0	0	0	0	0	0	0	0	0	0	0	0	0	0	0	0.338014	0	0
chr1_93214743_93214966_+	ENSG00000122483.17	CCDC18	chr1	93214743	93214966	+	ENST00000401026.7	12	12	0	0	0	0	0	0	0	0	0	0	0	0	0	0	0	0	0	0	0	0	0	0	0	0	0	0	0	0	0	0	0	0	0	0.340425	0	0	0	0	0	0
chr1_93214743_93226449_+	ENSG00000122483.17	CCDC18	chr1	93214743	93226449	+	ENST00000401026.7	12	17	0	0	0	0	0	0	0	0	0.267055	0	0	0	0	0	0	0	0	0	0	0	0.958564	0	0	0	0	0	0	0	0	0	0	0	0	0	0	0	0	0	0	0
chr1_93214743_93232593_+	ENSG00000122483.17	CCDC18	chr1	93214743	93232593	+	ENST00000401026.7	12	18	0	0	0	0	0	0	0	0	0.267055	0	0	0	0	0	0	0	0	0	0.291262	0	0	0	0	0	0	0	0	0	0	0	0	0	0	0	0	0	0	0	0	0
chr1_93214743_93239896_+	ENSG00000122483.17	CCDC18	chr1	93214743	93239896	+	ENST00000401026.7	12	21	0	0	0	0	0	0	0	0.414318	0	0	0	0	0	0	0	0	0	0	0	0	0	0	0	0	0	0	0	0	0	0	0	0	0	0	0	0	0	0	0	0
chr1_93214743_93246954_+	ENSG00000122483.17	CCDC18	chr1	93214743	93246954	+	ENST00000401026.7	12	23	0	0	0	0	0	0	0	0	0	0	0	0	0	0	0	0	0	0	0	0	0	0	0	0	0	0	0	0	0	0.229511	0	0	0	0	0.27011	0	0	0	0	0
chr1_93214743_93254614_+	ENSG00000122483.17	CCDC18	chr1	93214743	93254614	+	ENST00000401026.7	12	24	0	0	0	0	0	0	0.320729	0	0	0	0	0	0	0	0	0	0	0	0	0	0	0	0	0	0	0	0	0	0	0	0	0	0	0	0	0	0	0	0	0
chr1_93214743_93258885_+	ENSG00000122483.17	CCDC18	chr1	93214743	93258885	+	ENST00000401026.7	12	26	0	0	0	0	0	0	0	0	0	0	0	0	0	0	0	0	0	0	0	0	0	0	0	0	0	0	0	0	0	0	0	0	0	0	0	0	0.267418	0	0	0
chr1_93214743_93264901_+	ENSG00000122483.17	CCDC18	chr1	93214743	93264901	+	ENST00000401026.7	12	27	0	0	0	0	0	0	0	0	0	0	0	0	0	0	0	0.664375	0	0	0	0.276051	0	0	0	0	0	0	0	0	0.297656	0	0	0	0	0	0	0	0	0	0	0
chr1_169419013_169424950_-	ENSG00000117477.12	CCDC181	chr1	169419013	169424950	-	ENST00000545005.5	5	3	0	0	0	0	0	0	0	0	0	0	0	0	0	0	0	0	0	0	0	0	0	0	0	0	0	0	0	0	0	0	0	0	0	0	0	0	0	0	0.567498	0
chr1_42473122_42482816_+	ENSG00000186409.15	CCDC30	chr1	42473122	42482816	+	ENST00000477155.5	2	4	0	0	0	0	0	0	0	0	0	0	0	0	0	0	0	0.302829	0	0	0	0	0	0	0	0	0	0	0	0	0	0	0	0	0	0	0	0	0	0	0	0
chr1_42473122_42498916_+	ENSG00000186409.15	CCDC30	chr1	42473122	42498916	+	ENST00000477155.5	2	7	0	0	0	0	0	0	0	0	0	0	0	0	0	0	0	0	0	0	0	0	0	0	0	0.292128	0	0	0	0	0	0	0	0	0	0	0	0	0	0	0	0
chr1_42473122_42589483_+	ENSG00000186409.15	CCDC30	chr1	42473122	42589483	+	ENST00000477155.5	2	16	0	0	0	0	0.224177	0	0	0	0	0	0	0	0	0	0	0	0	0	0	0	0	0	0	0	0	0	0	0	0	0	0	0	0	0	0	0	0	0	0	0
chr1_42482663_42497213_+	ENSG00000186409.15	CCDC30	chr1	42482663	42497213	+	ENST00000477155.5	4	6	0	0	0	0	0	0	0	0	0	0	0	0	0	0	0	0	0	0	0	0	0	0	0	0	0	0	0	0	0	0	0	0	0	0	0	0	0	0	0	0
chr1_42482663_42498916_+	ENSG00000186409.15	CCDC30	chr1	42482663	42498916	+	ENST00000477155.5	4	7	0.263777	0	0	0	0	0	0	0	0	0	0	0	0	0	0	0.332188	0	0	0	0	0	0	0	0.876384	0	0	1.19227	0	0	0	0	0	0	0	0	0	0	0	0	0
chr1_42482663_42536601_+	ENSG00000186409.15	CCDC30	chr1	42482663	42536601	+	ENST00000477155.5	4	9	0	0	0	0	0	0	0	0	0.281873	0	0	0	0	0	0	0	0	0	0	0	0	0	0	0	0	0	0	0	0	0	0	0	0	0	0	0	0	0	0	0
chr1_42534889_42536601_+	ENSG00000186409.15	CCDC30	chr1	42534889	42536601	+	ENST00000477155.5	8	9	0.241694	0	0	0	0	0	0	0	0.594723	0	0	0	0	0	0	0	0	0	0	0	0	0	0	0	0	0	0.298068	0	0	0	0	0	0	0	0	0	0	0	0	0
chr1_42534889_42581514_+	ENSG00000186409.15	CCDC30	chr1	42534889	42581514	+	ENST00000477155.5	8	15	0	0	0	0	0	0	0	0	0	0	0	0	0	0	0	0.291251	0	0	0	0	0	0	0	0	0	0	0	0	0	0	0	0	0	0	0	0	0	0	0	0
chr1_42556156_42581514_+	ENSG00000186409.15	CCDC30	chr1	42556156	42581514	+	ENST00000477155.5	11	15	0	0	0	0	0.224177	0	0	0	0	0	0	0	0	0	0	0	0	0	0	0	0	0	0	0	0	0	0	0	0	0	0	0	0	0	0	0	0	0	0	0
chr1_42566296_42589483_+	ENSG00000186409.15	CCDC30	chr1	42566296	42589483	+	ENST00000477155.5	13	16	0	0	0	0	0	0	0	0	0	0	0	0	0	0.168313	0	0	0	0	0	0	0	0	0	0	0	0	0	0	0	0	0	0	0	0	0	0	0	0	0	0
chr1_42566296_42611090_+	ENSG00000186409.15	CCDC30	chr1	42566296	42611090	+	ENST00000477155.5	13	17	0	0	0	0	0	0	0	0	0	0	0	0	0	0	0	0	0	0	0.228832	0	0	0	0	0	0	0	0	0	0	0	0	0	0	0	0	0	0	0	0	0
chr1_1393396_1398671_-	ENSG00000221978.11	CCNL2	chr1	1393396	1398671	-	ENST00000496007.5	5	2	0	0	0	0	0	0.217621	0	0	0	0	0	0	0.620102	0	0	0	0	0	0	0	0	0	0	0	0	0	0	0	0	0	0	0	0	0	0	0	0	0	0	0
chr1_1390766_1398671_-	ENSG00000221978.11	CCNL2	chr1	1390766	1398671	-	ENST00000496007.5	6	2	0	0	0	0	0.401187	0	0	0	0	0	0	0	0	0	0	0	0	0	0	0	0	0	0	0	0	0	0	0	0	0	0	0	0	0	0	0	0	0	0	0
chr1_1390230_1398671_-	ENSG00000221978.11	CCNL2	chr1	1390230	1398671	-	ENST00000496007.5	8	2	0	0	0	0	0	0	0	0	0	0	0	0	0	0	0	0	0	0	0	0	0	0	0	0	0	0	0	0	0	0	0	0	0	0	0	0	0	0	0	0
chr1_1390230_1390563_-	ENSG00000221978.11	CCNL2	chr1	1390230	1390563	-	ENST00000496007.5	8	7	0	0	0	0	0	0	0	0	0	0	0	0	0	0	0	0	0	0	0.582524	0	0	0	0	0	0	0	0	0	0	0	0	0	0	0	0	0	0	0	0	0
chr1_1390230_1390371_-	ENSG00000221978.11	CCNL2	chr1	1390230	1390371	-	ENST00000496007.5	8	8	0	0	0	0	0	0	0	0	0	0	0	0	0	0	0	0	0	0	0	0	0	0	0	0	0	0	0	0	0	0	0	0	0	0	0	0	0	0	0	0
chr1_1387954_1398671_-	ENSG00000221978.11	CCNL2	chr1	1387954	1398671	-	ENST00000496007.5	11	2	0	0	0	0	0	0.388474	0	0	0	0	0	0	0	0	0	0	0	0	0	0	0	0	0	0	0	0	0	0	0	0	0	0	0	0	0	0	0	0	0	0
chr1_156333547_156335888_-	ENSG00000163468.14	CCT3	chr1	156333547	156335888	-	ENST00000368262.7	6	3	1.69186	0.813846	0	0	0	0	0.641459	0	0	0	0	0	0	0	0	0	0	0.84403	0.678359	0	0	0	0.994488	0	0	0	0	0	0	0	0	0	0	0	0	0	0	0	0	0
chr1_156333547_156334918_-	ENSG00000163468.14	CCT3	chr1	156333547	156334918	-	ENST00000368262.7	6	4	3.60455	1.90846	0	0	1.65667	2.72925	0.68821	1.1056	0	0.629299	7.03347	0.438693	3.23924	5.25509	0.241586	0.996563	0.791817	3.02314	1.09991	0	2.1398	1.08098	0.994488	0.876384	1.38541	3.75071	1.19227	3.6803	5.73984	1.00098	0.559112	6.23293	2.37941	1.91206	1.251	0.454332	10.2128	1.25522	2.79967	0
chr1_156324972_156335888_-	ENSG00000163468.14	CCT3	chr1	156324972	156335888	-	ENST00000368262.7	7	3	1.35394	0	0	0	0	0	0	0	1.33528	0	0	0	0	0	0	0	0	0	0	0	0	0	0	0	0	0	0	0	0	0	0	0	0	0	0	0	0	0	0	0
chr1_156324972_156334918_-	ENSG00000163468.14	CCT3	chr1	156324972	156334918	-	ENST00000368262.7	7	4	0	0.613268	0	0	0	0	0	0.22942	2.15126	0	0	0.877386	0	0	0.559125	0	0.273746	0	0	0	0	0.340888	0	0	0	0	0.891116	0.982799	1.0567	0	0	0.252936	0.677776	0	0.257402	0	0.585486	0.917209	0.567498	1.77895
chr1_156324972_156333643_-	ENSG00000163468.14	CCT3	chr1	156324972	156333643	-	ENST00000368262.7	7	6	0	0	0	0	0.311608	0	0	0	0	0	0.400444	0	0	0.168313	0	0	0	0	0	0.252769	0	0	0	0	0	0.468839	0	0	0	0	0	0	0	0	0	0.216034	0.267418	0	0	0
chr1_156320839_156335888_-	ENSG00000163468.14	CCT3	chr1	156320839	156335888	-	ENST00000368262.7	8	3	0	0	0	0	0	0	0	0	0	0	0	0	0	0	0	0	0	0	0	0	0	0	0	0	0	0	0	0	0	0	0	0	0	0	0	0	0	1.17838	0	0
chr1_156320839_156334918_-	ENSG00000163468.14	CCT3	chr1	156320839	156334918	-	ENST00000368262.7	8	4	0	0.613268	0	0.604644	0.934823	1.30573	0	0	0.267055	0	0	0.722821	0.966029	0.710044	0.79987	0	0.273746	1.26605	1.58284	0	0.262044	0	2.2585	0	0	0.864969	0	0.529753	0	0.229511	1.94546	0	0.682569	1.05787	0	0.227166	0	1.59057	0.359576	0.364473
chr1_156320839_156325089_-	ENSG00000163468.14	CCT3	chr1	156320839	156325089	-	ENST00000368262.7	8	7	0	0	0	0	0	0	0	0	0	0	0	0	0	0	0	0	0	0	0.452239	0	0	0	0	0	0	0.645973	0	0	0	0	0	0	0	0	0	0	0.267418	0	0	0
chr1_156318868_156335888_-	ENSG00000163468.14	CCT3	chr1	156318868	156335888	-	ENST00000368262.7	9	3	0	0	0	0	0	0	0	0	0	0	0	0	0	0	0	0	0	0	0	0	0	0	0	0	0	0	0	0	0	0	0	0.758807	0	0	0	0	0	0	0	0
chr1_156318868_156333643_-	ENSG00000163468.14	CCT3	chr1	156318868	156333643	-	ENST00000368262.7	9	6	0	0	0	0	0	0	0	0.22942	0	0	0	0	0	0	0.241586	0	0	0	0.22612	0	0	0	0	0	0	0	0	0	0	0	0	0.252936	0	0	0	0	0.267418	0	0	0
chr1_156318868_156325089_-	ENSG00000163468.14	CCT3	chr1	156318868	156325089	-	ENST00000368262.7	9	7	0.263777	0	0	0	0.311608	0	0	0	0	0	0	0	0	0	0	0	0	0	0	0	0	0	0	0	0	0	0.298068	0	0.704464	0	0	0	0	0.261939	0	0	0.267418	0	0.344189	0
chr1_156318868_156321025_-	ENSG00000163468.14	CCT3	chr1	156318868	156321025	-	ENST00000368262.7	9	8	0	0	0	0	0	0	0	0	0	0	0	0	0	0	0	0	0	0.620888	0.457664	0	0.234719	0	0	0	0	0	0	0	0	0	0	0	0	0	0	0	0	0	0	0
chr1_156317415_156335888_-	ENSG00000163468.14	CCT3	chr1	156317415	156335888	-	ENST00000368262.7	10	3	0	0	0	0	0.448354	0	0	0	0	0	0	0	0	0	0	0	0	0	0	0	0	0	0	0	0	0	0	0	0	0	0	0	0	0	0	0	0	0	0	0
chr1_156317166_156335888_-	ENSG00000163468.14	CCT3	chr1	156317166	156335888	-	ENST00000368262.7	11	3	0	0	0	0	0	1.08811	0	0	0	0	0	0	0	0	0	0	0	0	0	0	0	0	0	0	0	0.432484	0	0	0	0	0	0	0	0	0	1.06556	0	0	0	0
chr1_156317166_156334918_-	ENSG00000163468.14	CCT3	chr1	156317166	156334918	-	ENST00000368262.7	11	4	0.527554	0	0	0	0.623215	0	0	0	0	0	0.400444	1.11833	0	0	0	0	0	0	0	0	0	0	0	0.399049	0	0	0.298068	0.706337	0.297656	0	0	0	0	0	0	0	0	0.33668	0.344189	0
chr1_156317166_156333643_-	ENSG00000163468.14	CCT3	chr1	156317166	156333643	-	ENST00000368262.7	11	6	0	0	0	0	0	0	0	0	0	0	0	0	0.620102	0	0	0	0	0	0	0	0	0	0	0	0	0	0	0	0	0	0	0	0	0	0	0	0	0	0	0
chr1_156317166_156325089_-	ENSG00000163468.14	CCT3	chr1	156317166	156325089	-	ENST00000368262.7	11	7	0	0	0	0	0	0	0	0	0.267055	0	0	0	0	0	0.316699	0	0	0	0.291262	0	0	0	0	0.424084	0	0	0	0	0	0.280616	0	0	0	0	0	0	0	0.67336	0	0
chr1_156317166_156321025_-	ENSG00000163468.14	CCT3	chr1	156317166	156321025	-	ENST00000368262.7	11	8	0	0	0	0	0	0	0	0	0	0	0	0	0	0	0	0	0	0	0	0	0	0	0	0	0	0	0	0	0	0	0	0	0	0	0	0	0	0	0	0
chr1_156317166_156317547_-	ENSG00000163468.14	CCT3	chr1	156317166	156317547	-	ENST00000368262.7	11	10	0.805354	0.813846	0.326655	0	1.51517	2.72175	0.320729	1.05806	0	0.581	0.503213	0	0.571154	0.186709	0.558285	0.302829	0.273746	1.29856	0.291262	0.228857	1.20092	0.246697	0.331496	0.399049	0.583509	0	1.09297	1.98559	0.892968	1.24977	0	0	0.991156	0.450448	0.993597	2.00658	0.827579	1.07178	2.12668	1.09342
chr1_156312041_156335888_-	ENSG00000163468.14	CCT3	chr1	156312041	156335888	-	ENST00000368262.7	12	3	0	0	0	0	0	0	0	0	0	0	0	0	0	0	0	0	0	0	0	0	0	0	0	0	0	0	0	0	1.76116	0	0	0	0	0	0	0	0	0	0	0
chr1_156312041_156334918_-	ENSG00000163468.14	CCT3	chr1	156312041	156334918	-	ENST00000368262.7	12	4	0	0	0	0	0	0	0	0	0	0.547384	0	0	0	0	0	0	0	0	0	0	0	0	0	0.292128	0	0	0	0	0	0	0	0	0	0	0	0	0	0	0	0
chr1_156310950_156312221_-	ENSG00000163468.14	CCT3	chr1	156310950	156312221	-	ENST00000368262.7	13	12	0	0	0	0	0	0	0	0	0	0	0	0	0	0	0	0	0	0	0	0	0	0	0	0	0	0	0	0	0	0	0	0	0	0	0	0	0	0.183442	0	0
chr1_156310558_156335888_-	ENSG00000163468.14	CCT3	chr1	156310558	156335888	-	ENST00000368262.7	14	3	0	0	0	0	0.448354	0	0	0	0	0	0	0	0	0	0	0	0	0	0	0	0	0	0	0	0	0	0	0	0	0	0	0	0	0	0	0	0	0	0	0
chr1_156310558_156334918_-	ENSG00000163468.14	CCT3	chr1	156310558	156334918	-	ENST00000368262.7	14	4	0	0	0	0	0	0	0	0	0.267055	0	0	0	0	0	0	0	0	0	0	0	0	0	0	0	0	0	0	0	0	0	0	0.252936	0	0	0	0	0	0	0	0
chr1_156310558_156325089_-	ENSG00000163468.14	CCT3	chr1	156310558	156325089	-	ENST00000368262.7	14	7	0	0	0	0	0	0	0	0	0	0	0	0	0	0	0	0	0	0	0	0	0	0	0	0	0	0	0	0	0	0	0	0	0	0	0	0	0	0.338014	0	0
chr1_156310558_156317547_-	ENSG00000163468.14	CCT3	chr1	156310558	156317547	-	ENST00000368262.7	14	10	0	0	0	0	0.401187	0	0	0	0	0	0	0	0	0	0	0	0	0	0	0	0	0	0	0	0	0	0	0	0	0	0	0	0	0	0	0	0	0	0	0
chr1_156310558_156312221_-	ENSG00000163468.14	CCT3	chr1	156310558	156312221	-	ENST00000368262.7	14	12	0	0	0	0	0	0	0	0	0	0	0	0	0	0	0	0	0	0	0	0	0	0	0	0	0	0	0	0	0	0	0	0	0	0	0	0	0	0.183442	0	0
chr1_156333547_156337789_-	ENSG00000163468.14	CCT3	chr1	156333547	156337789	-	ENST00000472765.6	6	2	0	0	0	0	0	0	0	0	0	0	0	0.24094	0	0	0	0	0	0	0	0	0	0	0	0	0.692705	0	0	0	0	0	0	0	0	0	0	0	0	0	0	0
chr1_156320839_156337789_-	ENSG00000163468.14	CCT3	chr1	156320839	156337789	-	ENST00000472765.6	8	2	0	0	0	0	0	0	0	0	0	0	0	0	0	0	0	0	0	0	0	0	0	0	0	0.798098	0	0	0	0	0	0	0	0	0	0.261939	0	0	0	0	0	0
chr1_156317166_156337789_-	ENSG00000163468.14	CCT3	chr1	156317166	156337789	-	ENST00000472765.6	11	2	0	0	0	0	0	0	0	0	0.281873	0	0	0	0	0	0	0	0	1.66379	0	0	0.524088	0	0	0	0	0	0	0	0	0	0	0	0	0	0	0	0	0	0	0
chr1_156310558_156337789_-	ENSG00000163468.14	CCT3	chr1	156310558	156337789	-	ENST00000472765.6	14	2	0	0	0	0	0.311608	0	0	0	0	0	0	0	0	0	0	0	0	0	0	0	0	0	0	0	0	0	0	0	0	0	0	0	0	0	0	0	0	0	0	0
chr1_117009850_117025904_+	ENSG00000134256.12	CD101	chr1	117009850	117025904	+	ENST00000369470.1	2	8	0	0	0	0	0	0	0	0	0	0	0	0	0	0	0	0	0	0	0	0	0	0	0	0	0	0	0	0	0	0	0	0	0	0	0	0	0.534836	0	0	0
chr1_207757014_207757642_+	ENSG00000117335.19	CD46	chr1	207757014	207757642	+	ENST00000358170.6	2	3	0	0	0	0	0	0	0	0	0	0	0	0	0	0	0	0	0	0	0	0	0	0	0	0	0	0	0	0	0	0	0	0	0	0	0	0	0	0	0	0
chr1_207757014_207759724_+	ENSG00000117335.19	CD46	chr1	207757014	207759724	+	ENST00000358170.6	2	4	0	0.306634	0	0	0.759961	0.388474	0.255961	0	0	0	0	0	0.856731	0	0	0.291251	0	0	0	0	0	0	0	0	0	0	0.297039	0.353169	0.297656	0	0.547682	0	0	0	0	0	0	0.366884	0	0
chr1_207757014_207761446_+	ENSG00000117335.19	CD46	chr1	207757014	207761446	+	ENST00000358170.6	2	5	0	0	0	0	0.224177	0	0	0	0	0	0.400444	0	0	0	0.633398	0	0	0	0	0.276051	0	0.493394	0	0	0	0	0	0.3276	0	0	0	0	0	0	0	0	0	0	0	0
chr1_207757014_207767195_+	ENSG00000117335.19	CD46	chr1	207757014	207767195	+	ENST00000358170.6	2	6	1.01094	0.713557	0.406021	0	4.19624	0.606096	0	0.553919	1.18945	0	0	0.481881	1.03778	2.89924	0.559125	0.59408	1.68899	0.422015	1.1306	0	1.93461	0.340888	0.662992	0	1.27621	0.322986	0.893175	1.05951	1.54286	0.280616	0.547682	2.60588	0.225925	0.523879	0	1.03669	0	0.183442	0.567498	0.364473
chr1_207757014_207767823_+	ENSG00000117335.19	CD46	chr1	207757014	207767823	+	ENST00000358170.6	2	8	0	0	0	0	0	0	0	0	0	0	0	0	0	0	0	0	0	0	0	0	0	0.246697	0	0	0	0	0	0	0	0	0	0	0	0.565528	0	0	0	0	0	0
chr1_207757014_207770362_+	ENSG00000117335.19	CD46	chr1	207757014	207770362	+	ENST00000358170.6	2	9	0.241694	0	0	0	0	0.388474	0	0	0	0	0	0	0.691854	1.6826	0	0.302829	0	0	0.452239	0.276051	0	0	5.13956	0	0	0.468839	0	0	0	0	0	0	0	0.523879	0.257402	0.227166	0	0	0.359576	0
chr1_207757014_207785682_+	ENSG00000117335.19	CD46	chr1	207757014	207785682	+	ENST00000358170.6	2	12	0	0	0	0	0	0	0	0	0	0	0	0.24094	0	0	0	0	0	0	0	0	0	0	0.829183	0	0	0	0	0	0	0	0	0	0	0	0	0	0	0	0	0
chr1_207757540_207767195_+	ENSG00000117335.19	CD46	chr1	207757540	207767195	+	ENST00000358170.6	3	6	0	0	0	0	0	0	0	0	0	0	0	0	0	0	0	0.291251	0	0	0	0	0	0	0	0	0	0	0	0	0	0	0	0	0	0	0	0	0	0	0	0
chr1_207759639_207767195_+	ENSG00000117335.19	CD46	chr1	207759639	207767195	+	ENST00000358170.6	4	6	0	0	0	0	0	0	0	0	0	0	0	0	0	0	0	0	0	0	0	0	0	0	0	0	0	0	0	0	0	0	0	0	0	0	0	0	0	0	0	0
chr1_207761249_207767195_+	ENSG00000117335.19	CD46	chr1	207761249	207767195	+	ENST00000358170.6	5	6	0	0	0	0	0	0	0	0	0	0	0	0	0	0	0	0	0	0	0	0	0	0	0	0	0	0	0	0	0	0	0	0	0	0	0	0	0	0	0	0
chr1_207761249_207785682_+	ENSG00000117335.19	CD46	chr1	207761249	207785682	+	ENST00000358170.6	5	12	0	0	0	0	0	0	0	0	0	0	0	0	0	0	0	0	0	0	0	0	0	0	0.331496	0	0	0	0	0	0	0	0	0	0	0	0	0	0	0	0	0
chr1_207767013_207767195_+	ENSG00000117335.19	CD46	chr1	207767013	207767195	+	ENST00000358170.6	6	6	0	0	0	0	0	0	0	0	0	0	0	0	0	0	0	0	0	0	0	0	0	0	0	0	0	0	0	0	0	0	0	0	0	0	0	0	0	0	0	0
chr1_207770321_207790345_+	ENSG00000117335.19	CD46	chr1	207770321	207790345	+	ENST00000358170.6	9	13	0	0	0	0	0	0	0	0	0	0	0	0	0	0	0	0	0	0	0	0	0	0	0	0	0	0	0	0	0	0	0	0	0	0	0	0	0	0	0	0
chr1_207322382_207326837_+	ENSG00000196352.15	CD55	chr1	207322382	207326837	+	ENST00000645323.1	2	5	0	0	0	0	0	0	0	0	0	0	0	0	0	0	0	0	0	0	0.22612	0	0	0	0	0	0	0	0	0	0	0.280616	0	0	0	0	0	0	0	0	0	0
chr1_207322382_207337409_+	ENSG00000196352.15	CD55	chr1	207322382	207337409	+	ENST00000645323.1	2	8	0	0	0	0	0	0	0	0	0	0	0	0	0	0	0	0.302829	0	0	0	0	0	0.246697	0	0	0	0	0	0	0	0	0	0	0	0	0	0	0	0	0	0
chr1_207324559_207326837_+	ENSG00000196352.15	CD55	chr1	207324559	207326837	+	ENST00000645323.1	3	5	0	0	0	0	0	0	0	0.276959	0	0	0	0	0	0	0	0	0	0	0	0	0	0	0	0	0	0	0	0	0	0	0	0	0	0	0	0	0	0	0	0
chr1_207324559_207337409_+	ENSG00000196352.15	CD55	chr1	207324559	207337409	+	ENST00000645323.1	3	8	0	0	0	0	0	0	0	0	0	0	0	0	0	0	0	0	0	0	0	0	0	0	0	0	0	0	0	0	0	0	0	0	0	0	0	0	0	0	0	0
chr1_207331108_207331296_+	ENSG00000196352.15	CD55	chr1	207331108	207331296	+	ENST00000645323.1	6	6	0.263777	0	0	0	0.311608	0	0.969104	0.276959	0	0	0	0.559888	0	0	0	0	0	0	1.58555	0	0	0	0	0	0	1.07846	0	0	0.352232	0	0	0.298654	0	0	0.810329	0.216034	0.292743	0	0	1.77895
chr1_207336693_207337409_+	ENSG00000196352.15	CD55	chr1	207336693	207337409	+	ENST00000645323.1	7	8	0	0	0	0	0	0	0	0	0	0	0	0	0	0	0	0.302829	0	0	0	0	0	0	0	0	0	0	0	0	0	0	0	0	0	0	0	0	0	0	0	0
chr1_116535965_116544604_-	ENSG00000116815.15	CD58	chr1	116535965	116544604	-	ENST00000369489.9	3	2	0	0	0	0	0.672531	0	0	0	0	0	0	0	0	0	0	0	0	0	0	0	0	0	0	0	0	0	0	0	0	0	0	0	0	0	0	0	0	0.844368	0	0
chr1_100353762_100442996_+	ENSG00000079335.19	CDC14A	chr1	100353762	100442996	+	ENST00000647005.1	2	7	0	0	0	0	0	0	0	0	0	0	0	0	0	0	0	0	0	0	0	0	0	0	0	0	0	0	0	0	0	0	0.279556	0	0	0	0	0	0	0	0	0
chr1_100377546_100390824_+	ENSG00000079335.19	CDC14A	chr1	100377546	100390824	+	ENST00000647005.1	3	4	0	0	0	0	0.401187	0	0	0	0	0	0	0	0	0.373418	0	0	0	0	0	0	0	0	0	0	0	0	0	0	0	0	0	0	0	0	0	0	0	0	2.42471	0
chr1_100390732_100442996_+	ENSG00000079335.19	CDC14A	chr1	100390732	100442996	+	ENST00000647005.1	4	7	0	0	0	0	0.311608	0	0	0	0	0	0	0	0	0	0	0.302829	0	0.292181	0	0	0.234719	0	0	0	0	0	0	0	0	0	0	0	0	0	0	0	0.585486	0	0	0
chr1_100390732_100455492_+	ENSG00000079335.19	CDC14A	chr1	100390732	100455492	+	ENST00000647005.1	4	8	0	0	0	0	0	0.217621	0	0	0	0	0	0	0	0	0	0	0	0	0	0	0	0	0	0	0	0	0	0	0	0.229511	0	0	0	0	0	0	0	0	0	0
chr1_100424222_100442996_+	ENSG00000079335.19	CDC14A	chr1	100424222	100442996	+	ENST00000647005.1	5	7	0.805354	0.306634	0.406021	0	3.29738	4.48069	0.320729	0.414318	1.35009	0.629299	0.286956	0	0	2.20704	0.79987	0.302829	4.30302	1.26605	0.683784	1.51599	2.0417	1.71159	0.994488	1.11526	0	0.468839	1.19021	0	0.704464	0.479757	0.547682	0	0.225925	0.450448	0.509506	0.432068	1.78921	0.50502	2.48626	0
chr1_100424222_100455492_+	ENSG00000079335.19	CDC14A	chr1	100424222	100455492	+	ENST00000647005.1	5	8	0	0	0	0	0	0	0	0	0	0	0	0	0	0	0	0	0	0	0	0.252769	0	0	0	0	0	0	0	0	0	0	0	0	0	0	0	0	0	0	0	0
chr1_100424222_100462881_+	ENSG00000079335.19	CDC14A	chr1	100424222	100462881	+	ENST00000647005.1	5	9	0	0	0	0	0	0	0	0	0	0	0	0	0	0	0	0	0	0	0	0	0	0	0	0	0	0	0	0	0	0	0	0.252936	0	0	0	0	0	0.366884	0	0
chr1_100424222_100468094_+	ENSG00000079335.19	CDC14A	chr1	100424222	100468094	+	ENST00000647005.1	5	10	0.263777	0	0	0	0.535785	0	0	0	0	0	0	0	0	0	0	0.291251	0.70762	0	0.291262	0.276051	0.234719	0	0	0	0	0	0	0	0	0	0	0	0	0	0	0	0	0	0	0
chr1_100424222_100484451_+	ENSG00000079335.19	CDC14A	chr1	100424222	100484451	+	ENST00000647005.1	5	11	0	0	0	0	0	0	0	0	0	0	0	0	0	0	0	0	0	0	0	0	0	0	0	0.584256	0	0	0	0	0	0	0	0	0	0	0	0	0	0	0	0
chr1_100424222_100498207_+	ENSG00000079335.19	CDC14A	chr1	100424222	100498207	+	ENST00000647005.1	5	14	0	0	0	0	0	0	0	0	0	0	0	0	0	0	0	0	0	0	0	0	0	0	0	0	0	0	0	0	0	0	0	0	0	0	0	0	0	0.338014	0	0
chr1_100424222_100499262_+	ENSG00000079335.19	CDC14A	chr1	100424222	100499262	+	ENST00000647005.1	5	15	0	0	0	0	0	0	0	0	0	0	0	0	0	0	0	0	0	0.584363	0	0	0	0	0	0	0	0	0	0	0	0	0	0	0	0	0	0	0	0	0	0
chr1_100439932_100442996_+	ENSG00000079335.19	CDC14A	chr1	100439932	100442996	+	ENST00000647005.1	6	7	0	0	0	0	0	0	0	0	0	0	0	0	0	0	0	0	0	0	0	0	0	0	0	0	0	0	0	0	0	0.250246	0	0	0	0	0	0	0	0	0	0
chr1_100439932_100455492_+	ENSG00000079335.19	CDC14A	chr1	100439932	100455492	+	ENST00000647005.1	6	8	0	0.306634	0	0	0	0.513773	0	0	0.267055	0	0.286956	0	0	0.373418	0	0	0	0	0	0	0	0	0	0	0	0	0	0	0.352232	0	0	0	0	0	0	0	0	0	0.359576	0
chr1_100439932_100462881_+	ENSG00000079335.19	CDC14A	chr1	100439932	100462881	+	ENST00000647005.1	6	9	0	0	0	0	0	0	0	0	0	0	0	0	0	0	0	0	0	0.620888	0	0	0	0	0	0	0	0	0	0.176584	0	0	0	0	0	0	0	0	0	0	0	0
chr1_100439932_100468094_+	ENSG00000079335.19	CDC14A	chr1	100439932	100468094	+	ENST00000647005.1	6	10	0	0	0	0	0	0	0	0	0	0	0	0	0	0	0.483172	0	0	0	0.291262	0	0	0	0	0	0	0	0	0	0	0	0	0	0	0	0	0	0	0	0	0
chr1_100439932_100484451_+	ENSG00000079335.19	CDC14A	chr1	100439932	100484451	+	ENST00000647005.1	6	11	0	0	0	0	0	0	0	0	0	0	0	0	0	0	0	0	0	0	0	0	0	0	0	0	0	0	0	0	0.352232	0	0	0	0	0	0.27011	0	0	0	0	0
chr1_100455405_100462881_+	ENSG00000079335.19	CDC14A	chr1	100455405	100462881	+	ENST00000647005.1	8	9	0	0	0	0	0	0	0	0	0	0	0	0	0	0	0	0	0	0	0	0	0	0	0	0	0	0	0	0	0	0	0	0	0	0	0	0	0	0	0	0
chr1_100455405_100484451_+	ENSG00000079335.19	CDC14A	chr1	100455405	100484451	+	ENST00000647005.1	8	11	0	0	0	0	0	0	0.216125	0	0	0	0	0	0	0	0	0	0	0	0	0	0	0	0	0	0	0	0	0	0	0	0	0	0	0	0	0	0	0	0	0
chr1_100455405_100499262_+	ENSG00000079335.19	CDC14A	chr1	100455405	100499262	+	ENST00000647005.1	8	15	0	0	0	0	0	0	0	0	0	0	0	0	0	0	0	0	0	0	0	0	0	0	0	0	0	0	0	0	0	0	0	0	0	0	0	0	0	0	0	0
chr1_100462651_100468094_+	ENSG00000079335.19	CDC14A	chr1	100462651	100468094	+	ENST00000647005.1	9	10	0	0	0	0	0	0	0	0	0	0	0	0	0	0	0	0	0	0	0	0	0	0	0	0	0	0	0	0	0	0	0	0	0	0	0	0	0	0	0	0
chr1_100467956_100468094_+	ENSG00000079335.19	CDC14A	chr1	100467956	100468094	+	ENST00000647005.1	10	10	0	0	0	0	0	0	0	0	0	0	0	0	0	0	0	0	0	0	0	0	0	0	0	0	0	0	0	0.26688	0	0	0	0	0	0	0	0	0	0	0	0
chr1_100467956_100499262_+	ENSG00000079335.19	CDC14A	chr1	100467956	100499262	+	ENST00000647005.1	10	15	0	0	0	0	0	0	0	0	0	0	0	0	0	0	0	0	0	0	0	0	0	0	0	0	0	0	0	0	0	0	0	0	0	0	0	0	0	0	0	0
chr1_100484292_100499262_+	ENSG00000079335.19	CDC14A	chr1	100484292	100499262	+	ENST00000647005.1	11	15	0	0	0	0	0.224177	0	0	0	0	0	0	0	0	0	0	0	0.627556	0	0	0	0	0	0	0	0	0	0	0	0	0	0	0	0	0	0	0	0	0	0	0
chr1_100494818_100498207_+	ENSG00000079335.19	CDC14A	chr1	100494818	100498207	+	ENST00000647005.1	12	14	0	0	0	0	0	0	0	0	0	0	0	0	0	0	0	0	0	0	0	0	0	0	0	0	0	0	0	0	0	0	0	0	0	0	0	0	0	0	0	0
chr1_100494818_100499262_+	ENSG00000079335.19	CDC14A	chr1	100494818	100499262	+	ENST00000647005.1	12	15	0	0	0	0	0	0	0	0	0	0	0	0	0.285577	0	0	0	1.32537	0	0	0	0.262044	0	0	0	0	0	0.297039	0	0.297656	1.40308	0	0	0	0	0	0	0.714721	0	0	0
chr1_100494818_100504937_+	ENSG00000079335.19	CDC14A	chr1	100494818	100504937	+	ENST00000647005.1	12	16	0	0	0	0	0	0	0	0	0	0	0	0	0	0	0	0	0.273746	0	0	0	0	0	0	0	0	0	0	0	0	0	0	0	0	0	0	0	0	0	0	0
chr1_43359167_43359396_+	ENSG00000117399.13	CDC20	chr1	43359167	43359396	+	ENST00000310955.10	2	2	0	0	0	1.34621	0	0	0	0	0	0	0	0	0	0	0	0	0	0	0	0	0	0.187335	0	0	0	0	0	0	0	0	0	0	0	0	0	0	0	0	0	0
chr1_43359167_43359638_+	ENSG00000117399.13	CDC20	chr1	43359167	43359638	+	ENST00000310955.10	2	3	0	0	0	0	0	0	0	0	0	0	0	0	0	0	0	0	0	0.292181	0	0	0	0	0	0	0	0	0	0	0	0	0	0	0	0	0	0	0	0.338014	0	0
chr1_43359167_43360961_+	ENSG00000117399.13	CDC20	chr1	43359167	43360961	+	ENST00000310955.10	2	8	0	0	0	0	0.224177	0.388474	0	0	0	0	0	0	0	0	0	0	0	0	0	0	0	0	0	0	0	0	0	0	0	0	0	0	0	0	0	0	0	0	0	0
chr1_43359167_43361245_+	ENSG00000117399.13	CDC20	chr1	43359167	43361245	+	ENST00000310955.10	2	9	0	0	0	0	0	0	0	0	0	0	0	0	0	0	0	0	0	0	0	0	0	0	0	0	0	0	0	0	0	0	0	0	0	0	0	0	0	0	0	0
chr1_43359490_43359638_+	ENSG00000117399.13	CDC20	chr1	43359490	43359638	+	ENST00000310955.10	3	3	0	0	0	0	0	0	0	0	0	0	0	0	0	0	0	0	0	0	0	0	0	0	0	0	0	0	0	0.26688	0	0	0	0	0	0	0	0	0	0	0	0
chr1_43359490_43360593_+	ENSG00000117399.13	CDC20	chr1	43359490	43360593	+	ENST00000310955.10	3	7	0	0	0	0	0	0	0	0	0	0	0	0	0	0	0	0	0	0	0	0	0	0	0	0	0	0	0	0	0	0	0	0	0	0	0	0	0	0	0	0.364473
chr1_43359490_43360961_+	ENSG00000117399.13	CDC20	chr1	43359490	43360961	+	ENST00000310955.10	3	8	0	0	0	0	0	0	0	0	0	0	0	0	0	0	0	0	0	0	0	0	0	0	0	0	0	0	0	0	0	0.229511	0	0	0	0	0	0	0	0	0	0
chr1_43359725_43360097_+	ENSG00000117399.13	CDC20	chr1	43359725	43360097	+	ENST00000310955.10	4	5	0	0	0	0	0	0	0	0	0	0	0	0	0	0	0	0	0	0	0	0	0	0	0	0	0	0	0	0	0	0	0	0	0	0	0	0	0	0	0	0
chr1_22078429_22081794_+	ENSG00000070831.15	CDC42	chr1	22078429	22081794	+	ENST00000344548.7	3	4	0	0	0	0	0	0	0.216125	0	0	0	0	0	0	0	0	0	0	0	0	0	0	0	0	0	0	0	0	0	0	0	0	0	0	0	0	0	0	0	0	0
chr1_22078429_22086866_+	ENSG00000070831.15	CDC42	chr1	22078429	22086866	+	ENST00000344548.7	3	6	1.55953	1.78231	0.900362	0.604644	9.1572	2.37254	0.511922	2.76209	0.281873	0	0.903657	0.878836	0.631504	1.47528	2.08375	0	0.881688	0.620888	0.454952	0.457715	4.45339	1.70235	1.20891	2.23052	0.583509	0	2.87829	2.12302	2.15927	0.561233	1.98554	1.6642	0.269653	0.974327	1.02961	0.670366	2.24065	3.01413	5.3422	1.51835
chr1_22078429_22078881_+	ENSG00000070831.15	CDC42	chr1	22078429	22078881	+	ENST00000498236.1	2	3	0	0	0	0	0	0.513773	0	0	0	0	0	0	0	0	0	0	0	0	0	0	0	0	0	0	0	0	0	0	0	0	0	0	0.269653	0	0	0	0	0	0	0
chr1_227213136_227254155_-	ENSG00000143776.18	CDC42BPA	chr1	227213136	227254155	-	ENST00000334218.9	3	2	0	0	0	0	0	0	0	0	0	0	0	0	0.620102	0	0	0	0	0	0	0	0	0	0	0	0	0	0	0	0	0	0	0	0	0	0	0	0	0	0	0
chr1_227199557_227254155_-	ENSG00000143776.18	CDC42BPA	chr1	227199557	227254155	-	ENST00000334218.9	4	2	0	0	0	0	0	0	0	0	0	0	0	0	0	0.186709	0	0	0	0	0	0	0	0	0	0	0	0	0	0	0	0	0	0	0	0	0	0	0	0	0.719152	0
chr1_227193786_227254155_-	ENSG00000143776.18	CDC42BPA	chr1	227193786	227254155	-	ENST00000334218.9	5	2	0	0	0.820996	0.673104	3.3467	0.770659	0.320729	0.276959	0.801166	0.547384	0.400444	0.318948	0.691854	1.12025	0.241586	1.20594	0	0	3.80163	0.228857	0.786132	0.170444	0.918729	1.22218	0	0.322986	0.297039	0.680768	1.00212	0.229511	0	0.298654	0.539305	0	0.239396	0	0	0	0.567498	0
chr1_227193786_227213219_-	ENSG00000143776.18	CDC42BPA	chr1	227193786	227213219	-	ENST00000334218.9	5	3	0	0	1.62409	0	0.625364	0.870486	0.216125	0.22942	0	0	0	0	0.285577	2.29955	0.800711	0.291251	0.35381	0.714196	3.08883	0	0.958564	0	0	0	0	0	1.29173	0.26688	0	0	0	1.18864	0	0.638958	0	0.227166	0.267418	0.858136	2.87661	0
chr1_227193786_227199652_-	ENSG00000143776.18	CDC42BPA	chr1	227193786	227199652	-	ENST00000334218.9	5	4	0.270788	0.343846	0.326655	0	0.311608	0.435243	0	0	0.267055	0	0	0	0.620102	1.497	0.633398	0.291251	0	0	0	0	0	0.357779	0	0	0	0	0	0	0.892968	0.479757	0	0	0	0	0	0	0.852904	0	2.14207	0
chr1_227160543_227254155_-	ENSG00000143776.18	CDC42BPA	chr1	227160543	227254155	-	ENST00000334218.9	6	2	0	0	0	0	0.623215	0	0.511922	0.22942	0	0	0.800889	0	0	0.187263	0.241586	0	0	0	2.05135	0	0.524088	0	1.38197	0	0	0	0	0.3276	0	0	0	0	0	0.188509	0	0	0	0	0.344189	0
chr1_227160543_227213219_-	ENSG00000143776.18	CDC42BPA	chr1	227160543	227213219	-	ENST00000334218.9	6	3	0	0.306634	0	0	0.448354	0	0	0	0	0	0	0	0.285577	0	0	0	0	0	0.909903	0	0.234719	0	0	0	0	0	0	0	0	0	0	0	0	0	0	0	0	0	0.688377	0
chr1_227142945_227254155_-	ENSG00000143776.18	CDC42BPA	chr1	227142945	227254155	-	ENST00000334218.9	9	2	0	0	0	0	0	0	0	0	0	0	0	0	0	0	0	0	0	0	0	0.228857	0	0	0	0	0	0	0	0	0	0	0	0	0	0	0	0	0	0	0	0
chr1_227142945_227147559_-	ENSG00000143776.18	CDC42BPA	chr1	227142945	227147559	-	ENST00000334218.9	9	7	0	0	0	0	0	0	0	0	0	0	0	0	0	0	0	0	0	0	0	0	0.234719	0	0	0	0	0	0	0	0	0	0	0	0	0	0	0	0	0	0	0
chr1_227139576_227254155_-	ENSG00000143776.18	CDC42BPA	chr1	227139576	227254155	-	ENST00000334218.9	10	2	0	0	0	0	0	0	0	0	0	0	0	0	0	0.373972	0	0	0	0	0.452239	0	0.262044	0	0.310838	0	0	0	0	0.176584	0	0	0	0	0	0	0	0	0	0	0	0
chr1_227139576_227213219_-	ENSG00000143776.18	CDC42BPA	chr1	227139576	227213219	-	ENST00000334218.9	10	3	0	0	0	0	0	0	0	0	0	0	0	0	0	0.373972	0	0.291251	0	0.620888	0.686496	0	0.262044	0	0	0	0	0	0	0	0	0	0	0	0	0	0	0	0	0	0	0
chr1_227139576_227199652_-	ENSG00000143776.18	CDC42BPA	chr1	227139576	227199652	-	ENST00000334218.9	10	4	0	0	0	0	0	0	0	0	0	0	0	0	0	0	0	0	0	0	0	0	0	0	0	0	0	0	0	0.533761	0	0	0	0	0	0	0	0	0	0	0	0
chr1_227139576_227160636_-	ENSG00000143776.18	CDC42BPA	chr1	227139576	227160636	-	ENST00000334218.9	10	6	0	0	0	0	0	0	0	0	0	0	0	0	0	0	0	0	0	0	0	0	0	0	0	0	0	0	0	0	0	0	0	0	0	0	0	0	0	0	0	0
chr1_227139576_227147559_-	ENSG00000143776.18	CDC42BPA	chr1	227139576	227147559	-	ENST00000334218.9	10	7	0.769248	1.37538	0.326655	1.27775	2.1877	0	0.767883	0	0	0.629299	0	0	0	1.06507	0.633398	0	0	0	0.915328	0.276051	1.69005	0.187335	0	0	0	0	0.893175	0.443465	0.561837	0	0.838668	0.859673	0.225925	0.188509	2.68208	1.0913	0	0.366884	3.69597	0.728946
chr1_227139576_227139742_-	ENSG00000143776.18	CDC42BPA	chr1	227139576	227139742	-	ENST00000334218.9	10	10	0	0	0	0	0	0	0	0	0	0	0	0	0	0	0	0	0	0	0	0	0.479282	0	0	0	0	0	0	0	0.352232	0	0	0	0	0	0	0	0	0	0	0
chr1_227129109_227213219_-	ENSG00000143776.18	CDC42BPA	chr1	227129109	227213219	-	ENST00000334218.9	11	3	0	0	0	0	0	0	0	0	0	0	0	0	0	0	0	0	0	0	0	0	0	0	0	0.399049	0	0	0	0	0	0	0	0	0	0	0	0	0	0	0	0
chr1_227129109_227160636_-	ENSG00000143776.18	CDC42BPA	chr1	227129109	227160636	-	ENST00000334218.9	11	6	0	0	0	0	0	0	0	0	0	0	0	0	0	0	0	0	0	0	0	0	0	0	0	0.424084	0	0	0	0	0	0	0	0	0	0	0	0	0	0	0	0
chr1_227129109_227147559_-	ENSG00000143776.18	CDC42BPA	chr1	227129109	227147559	-	ENST00000334218.9	11	7	0	0	0	0	0	0	0	0	0	0	0	0	0	0	0	0	0	0	0	0	0	0	0	0	0	0	0	0	0	0	0	0	0	0	0	0	0	0	0	0
chr1_227119804_227213219_-	ENSG00000143776.18	CDC42BPA	chr1	227119804	227213219	-	ENST00000334218.9	12	3	0	0	0	0	0	0	0	0	0	0	0	0	0	0	0	0	0.70762	0	0	0	0	0	0	0	0	0	0	0	0	0	0	0	0	0	0	0	0	0	0	0
chr1_227119804_227160636_-	ENSG00000143776.18	CDC42BPA	chr1	227119804	227160636	-	ENST00000334218.9	12	6	0	0	0	0	0	0	0	0	0	0	0	0	0	0.168313	0	0	0	0	0	0	0	0	0	0	0	0	0	0	0	0	0	0	0	0	0	0	0	0	0	0
chr1_227119804_227147559_-	ENSG00000143776.18	CDC42BPA	chr1	227119804	227147559	-	ENST00000334218.9	12	7	0	0	0	0	0.896708	0	0	0	0	0	0	0	0.345927	0	0.483172	0	0.273746	0	0.457664	0	0.966201	0	0	0	0	0	0	0	0	0	0	0	0.269653	0	0	0	0	0	0	0
chr1_227119804_227139742_-	ENSG00000143776.18	CDC42BPA	chr1	227119804	227139742	-	ENST00000334218.9	12	10	0	0	0	0	0	0	0	0	0	0	0	0	0	0	0	0	0	0	0	0	0.479282	0	0	0	0	0	0	0	0	0	0	0	0	0	0	0	0	0	0	0
chr1_227119804_227129231_-	ENSG00000143776.18	CDC42BPA	chr1	227119804	227129231	-	ENST00000334218.9	12	11	0	0	0	0	0.224177	0.513773	0	0	0	0	0	0	0	0.747945	0	0	0	0	0.22612	0	0	0.187335	0	0	0.692705	0	0	0	0	0	0	0	0	0.261939	0	0	0.585486	0.506354	0.911687	0
chr1_227112671_227119937_-	ENSG00000143776.18	CDC42BPA	chr1	227112671	227119937	-	ENST00000334218.9	13	12	0	0	0	0	0	0	0	0	0	0	0	0	0	0	0	0	0	0	0	0	0	0	0	0	0	0	0	0	0	0	0	0	0	0	0	0	0	0	0	0
chr1_227112671_227112913_-	ENSG00000143776.18	CDC42BPA	chr1	227112671	227112913	-	ENST00000334218.9	13	13	0	0	0	0	0	0	0	0	0	0	0	0	0	0.187263	0	0	0	0	0	0	0	0	0	0	0	0	0	0	0	0	0	0	0	0	0	0	0	0	0	0
chr1_227112312_227254155_-	ENSG00000143776.18	CDC42BPA	chr1	227112312	227254155	-	ENST00000334218.9	14	2	0	0	0	0	0	0	0	0	0	0	0	0	0	0	0	0	0	0	0.22612	0	0	0	0	0	0	0	0	0	0	0	0	0	0	0	0	0	0	0	0	0
chr1_227112312_227213219_-	ENSG00000143776.18	CDC42BPA	chr1	227112312	227213219	-	ENST00000334218.9	14	3	0	0	0	0	0	0	0.641459	0	0	0	0	0	0	0	0	0	0.35381	0	0	0	0	0	0	0	0	0	0	0	0	0.229511	0	0	0	0	0	0	0	0	0	0
chr1_227112312_227199652_-	ENSG00000143776.18	CDC42BPA	chr1	227112312	227199652	-	ENST00000334218.9	14	4	0	0	0	0	0	0	0	0	0	0	0	0	0	0	0	0.605658	0	0	0	0	0	0	0	0.292128	0	0	0	0	0	0	0	0	0	0	0	0	0	0	0	0
chr1_227112312_227160636_-	ENSG00000143776.18	CDC42BPA	chr1	227112312	227160636	-	ENST00000334218.9	14	6	0	0	0	0	0	0	0	0	0	0	0	0	0	0.560681	0	0	0	0	0	0	0	0	0	0	0	0	0	0	0	0	0	0	0	0	0	0	0	0	0	0
chr1_227112312_227147559_-	ENSG00000143776.18	CDC42BPA	chr1	227112312	227147559	-	ENST00000334218.9	14	7	0	0	0	0	0	0	0	0	0	0	0	0	0	0.186709	0	0	0	0	0	0	0.479282	0	0	0	0	0	0	0.655199	0.561837	0	0	0	0	0	0	0	0	0	0	0
chr1_227112312_227129231_-	ENSG00000143776.18	CDC42BPA	chr1	227112312	227129231	-	ENST00000334218.9	14	11	0	0.406923	0	0	0.401187	0.776948	0.752979	0	0	0	0	0.24094	0.285577	1.27183	0	0	0	0.620888	0.686496	0	0	0	1.41642	1.72455	0	1.26066	0	0	0	0.709268	0	0	0.269653	0	0	0.432068	0.534836	0.16834	1.42292	0
chr1_227112312_227119937_-	ENSG00000143776.18	CDC42BPA	chr1	227112312	227119937	-	ENST00000334218.9	14	12	0	0	0	0	0	0	0	0	0	0	0	0	0	0	0	0	0	0	0	0	0	0	0	0	0	0	0	0	0	0	0	0	0	0	0	0	0	0	0	0
chr1_227112312_227112913_-	ENSG00000143776.18	CDC42BPA	chr1	227112312	227112913	-	ENST00000334218.9	14	13	0	0	0	0	0	0.217621	0	0	0	0	0.573911	0	0	1.47583	0.241586	0	0	0	0	0	0	0.417141	0.932515	0	0	0	0	0	0	0	0	0.252936	0	0	0	0.355187	0.267418	0.183442	0.344189	0
chr1_227100992_227129231_-	ENSG00000143776.18	CDC42BPA	chr1	227100992	227129231	-	ENST00000334218.9	15	11	0	0	0	0	0	0	0	0	0	0	0	0	0	0.168313	0	0	0	0	0	0	0	0	0	0	0	0	0	0	0	0	0	0	0	0	0	0	0	0	0	0
chr1_227100992_227101239_-	ENSG00000143776.18	CDC42BPA	chr1	227100992	227101239	-	ENST00000334218.9	15	15	0	0	0	0	0.224177	0	0	0	0	0	0	0	0	0	0	0	0	0	0	0	0	0	0	0	0	0	0	0	0.297656	0	0	0	0	0	0	0	0	0	0	0
chr1_227091886_227254155_-	ENSG00000143776.18	CDC42BPA	chr1	227091886	227254155	-	ENST00000334218.9	16	2	0	0	0	0	0	0	0	0	0	0	0	0	0	0	0	0	0	0	0	0	0	0	0	0	0	0	0	0	0	0	0	0	0	0	0	0	0	0	0	0
chr1_227091886_227199652_-	ENSG00000143776.18	CDC42BPA	chr1	227091886	227199652	-	ENST00000334218.9	16	4	0	0.406923	0	0	0	0	0	0	0.281873	0	0	0	0	0.186709	0	0	0	0	0	0	0	0	0	0	0	0	0	0	0	0	0	0	0	0	0	0	0	0	0	0
chr1_227091886_227139742_-	ENSG00000143776.18	CDC42BPA	chr1	227091886	227139742	-	ENST00000334218.9	16	10	0	0	0	0	0	0	0	0	0	0	0	0	0	0	0	0	0	0	0	0.505539	0	0	0	0	0	0	0	0	0	0	0	0	0	0	0	0	0	0	0	0
chr1_227091886_227119937_-	ENSG00000143776.18	CDC42BPA	chr1	227091886	227119937	-	ENST00000334218.9	16	12	0	0	0	0	0	0	0	0	0	0	0	0	0	0.374527	0	0	0	0	0	0	0	0	0	0	0	0	0	0	0	0	0	0	0	0	0	0	0	0	0	0
chr1_227091886_227101239_-	ENSG00000143776.18	CDC42BPA	chr1	227091886	227101239	-	ENST00000334218.9	16	15	0	0	0	0	0	0	0	0	0	0	0	0.24094	0	0	0	0	0	0	0	0	0	0	0	0	0	0	0.993664	0	0	0	0	0	0	0	0	0	0	0	0	0
chr1_227080893_227199652_-	ENSG00000143776.18	CDC42BPA	chr1	227080893	227199652	-	ENST00000334218.9	17	4	0	0	0	0	0	0	0	0	0	0	0	0	0	0.186709	0	0	0	0	0	0	0	0	0	0	0	0	0	0	0	0	0	0	0	0	0	0	0	0	0	0
chr1_227080893_227147559_-	ENSG00000143776.18	CDC42BPA	chr1	227080893	227147559	-	ENST00000334218.9	17	7	0	0	0	0	0	0	0	0	0	0	0	0	0	0.56179	0	0	0	0	0	0	0	0	0	0	0	0	0	0	0	0	0	0	0	0	0	0	0	0	0	0
chr1_227080893_227143024_-	ENSG00000143776.18	CDC42BPA	chr1	227080893	227143024	-	ENST00000334218.9	17	9	0	0	0	0	0	0	0.511922	0	0	0	0	0	0	0	0	0	0	0	0	0	0	0	0	0	0	0	0	0	0	0	0	0	0	0	0	0	0	0	0	0
chr1_227080893_227119937_-	ENSG00000143776.18	CDC42BPA	chr1	227080893	227119937	-	ENST00000334218.9	17	12	0	0	0	0	0	0	0	0	0	0	0	0	0	0	0	0	0	0	0	0	0	0	0	0	0	0	0	0	0	0	0	0	0	0	0	0	0	0	0	0
chr1_227080893_227112913_-	ENSG00000143776.18	CDC42BPA	chr1	227080893	227112913	-	ENST00000334218.9	17	13	0	0	0	0	0	0	0	0	0	0	0	0	0	0.186709	0	0	0	0	0	0	0	0	0	0	0	0	0	0	0	0	0	0	0	0	0	0	0	0	0	0
chr1_227080893_227101239_-	ENSG00000143776.18	CDC42BPA	chr1	227080893	227101239	-	ENST00000334218.9	17	15	0	0	0	0	0	0	0	0	0.267055	0	0	0	0	0	0	0	0	0	0	0	0	0	0	0	0	0	0	0.26688	0	0	0	0	0	0	0	0	0	0	0	0
chr1_227073864_227081017_-	ENSG00000143776.18	CDC42BPA	chr1	227073864	227081017	-	ENST00000334218.9	19	17	0	0	0	0	0	0	0	0	0	0	0	0	0	0.186709	0	0	0	0	0	0	0	0	0	0	0	0	0	0	0	0	0	0	0	0	0	0	0	0	0	0
chr1_227073864_227074364_-	ENSG00000143776.18	CDC42BPA	chr1	227073864	227074364	-	ENST00000334218.9	19	18	0	0	0	0	0	0	0	0	0	0	0	0	0	0	0	0	0	0	0	0	0	0	0	0	0	0	0	0	0	0	0	0	0	0	0	0	0.267418	0	0	0
chr1_227072208_227213219_-	ENSG00000143776.18	CDC42BPA	chr1	227072208	227213219	-	ENST00000334218.9	20	3	0	0	0	0	0	0	0	0	0	0	0	0	0	0	0	0	0	0	0.22612	0	0	0	0	0	0	0	0	0	0	0	0	0	0	0	0	0	0	0	0	0
chr1_227069777_227254155_-	ENSG00000143776.18	CDC42BPA	chr1	227069777	227254155	-	ENST00000334218.9	21	2	0	0	0	0	0	0	0	0	0	0	0	0	0	0	0	0	0	0	0.22612	0	0	0	0	0	0	0	0	0	0	0	0	0	0	0	0	0	0	0	0	0
chr1_227069777_227213219_-	ENSG00000143776.18	CDC42BPA	chr1	227069777	227213219	-	ENST00000334218.9	21	3	0	0	0	0	0	0	0	0	0	0	0	0	0.620102	0	0	0	0	0	0	0	0	0	0	0	0	0	0	0	0	0	0	0	0.341285	0	0	0.227166	0	0	0	0
chr1_227069777_227199652_-	ENSG00000143776.18	CDC42BPA	chr1	227069777	227199652	-	ENST00000334218.9	21	4	0	0	0	0	0	0	0	0	0	0	0	0	0	0.373418	0.316699	0	0	0	0	0	0	0	0	0	0	0	0	0	0	0	0	0	0	0	0	0	0.267418	0	0	0
chr1_227069777_227193934_-	ENSG00000143776.18	CDC42BPA	chr1	227069777	227193934	-	ENST00000334218.9	21	5	0	0	0	0	0	0	0	0	0	0	0	0	0	0	0	0	0	0	0	0	0	0	0	0	0	0.432484	0	0	0	0	0	0	0	0	0	0	0	0	0	0
chr1_227069777_227147559_-	ENSG00000143776.18	CDC42BPA	chr1	227069777	227147559	-	ENST00000334218.9	21	7	0	0	0	0	0	0	0	0	0	0	0	0	0	0	0	0	0	0	0	0	0	0	0	0	0	0	0	0	0	0	0	0.252936	0	0	0	0	0	0	0	0
chr1_227069777_227143024_-	ENSG00000143776.18	CDC42BPA	chr1	227069777	227143024	-	ENST00000334218.9	21	9	0	0	0	0	0	0	0	0	0	0	0	0	0	0	0	0	0	0	0	0	0	0	0	0	0	0	0	0	0	0	0	0	0	0	0	0	0	0	0	0
chr1_227069777_227139742_-	ENSG00000143776.18	CDC42BPA	chr1	227069777	227139742	-	ENST00000334218.9	21	10	0	0	0	0	0	0	0	0	0	0	0	0	0	0	0	0	0	0	0	0	0	0	0	0	0	0	0	0	0	0	0	0	0	0	0	0	0	0	0	0
chr1_227069777_227129231_-	ENSG00000143776.18	CDC42BPA	chr1	227069777	227129231	-	ENST00000334218.9	21	11	0	0	0	0	0	0	0	0	0	0	0	0	0	0	0	0	0	0	0	0	0	0	0	0	0	0	0	0	0.704464	0	0	0	0	0	0	0	0	0	0	0
chr1_227069777_227119937_-	ENSG00000143776.18	CDC42BPA	chr1	227069777	227119937	-	ENST00000334218.9	21	12	0	0	0	0	0.535785	0	0	0	0	0	0	0	0	0	0	0	0	0	0	0	0	0	0	0	0	0	0	0	0	0	0	0	0	0	0	0	0	0	0	0
chr1_227069777_227112913_-	ENSG00000143776.18	CDC42BPA	chr1	227069777	227112913	-	ENST00000334218.9	21	13	0	0	0	0	0.224177	0	0	0	0	0	0	0	0	0.355576	0	0	0	0.422015	0.228832	0	0.234719	0	0	0	0	0	0	0.3276	0	0	0	0	0.269653	0	0	0	0	0.183442	0	0
chr1_227069777_227112422_-	ENSG00000143776.18	CDC42BPA	chr1	227069777	227112422	-	ENST00000334218.9	21	14	0	0	0	0	0	0	0	0	0	0	0	0	0	0	0	0	0	0	0	0	0	0	0	0	0	0	0	0	0	0	0	0	0	0	0	0	0	0	0	0
chr1_227069777_227101239_-	ENSG00000143776.18	CDC42BPA	chr1	227069777	227101239	-	ENST00000334218.9	21	15	0	0	0	0	0.224177	0	0	0.735799	0	0	0	0	0	0.54284	0	0.291251	0	0	0	0	0.234719	0.791811	0	0.798098	0	0.322986	0	0	0	0	0	0.252936	0	0.261939	0	0.227166	0	0	1.04795	0
chr1_227069777_227081017_-	ENSG00000143776.18	CDC42BPA	chr1	227069777	227081017	-	ENST00000334218.9	21	17	0	0	0	0	0	0.217621	0	0	0	0	0	0	0	0	0	0	0	0	0	0	0	0	0	0	0	0	0	0	0	0	0	0	0	0	0	0	0	0	0.344189	0
chr1_227069777_227074364_-	ENSG00000143776.18	CDC42BPA	chr1	227069777	227074364	-	ENST00000334218.9	21	18	0	0	0	0	0	0	0	0	1.18945	0	0	0	0	0	0	0	0	0	0	0	0	0	0	0	0	0	0	0	0	0.250246	0	0.298654	0	0	0	0	0	0	0	0
chr1_227047927_227139742_-	ENSG00000143776.18	CDC42BPA	chr1	227047927	227139742	-	ENST00000334218.9	23	10	0	0	0	0	0	0	0	0.22942	0	0	0	0	0	0	0	0	0	0	0	0	0	0	0	0	0	0	0	0	0	0	0	0	0	0	0	0	0	0	0	0
chr1_227047927_227129231_-	ENSG00000143776.18	CDC42BPA	chr1	227047927	227129231	-	ENST00000334218.9	23	11	0	0	0	0	0	0	0	0	0	0	0	0	0	0	0	0	0	0	0	0	0	0	0	0	0	0	0	0	0	0	0	0	0	0	0	0	0	0	0	0
chr1_227047927_227081017_-	ENSG00000143776.18	CDC42BPA	chr1	227047927	227081017	-	ENST00000334218.9	23	17	0	0	0	0	0	0	0	0	0	0	0	0	0	0.187263	0	0	0	0	0	0	0	0	0	0	0	0	0	0	0	0	0	0	0	0	0	0	0	0	0	0
chr1_227047927_227074364_-	ENSG00000143776.18	CDC42BPA	chr1	227047927	227074364	-	ENST00000334218.9	23	18	0	0	0	0	0	0.217621	0	0	0	0	0	0	0	0	0	0	0	0	0	0	0	0	0	0	0	0	0	0	0	0	0	0	0	0	0	0	0	0	0	0
chr1_227047927_227074012_-	ENSG00000143776.18	CDC42BPA	chr1	227047927	227074012	-	ENST00000334218.9	23	19	0	0	0	0	0	0	0	0	0	0	0	0	0	0	0	0	0	0	0	0	0	0	0	0	0	0	0	0	0	0	0	0	0	0	0	0	0	0	0.359576	0
chr1_227040131_227254155_-	ENSG00000143776.18	CDC42BPA	chr1	227040131	227254155	-	ENST00000334218.9	24	2	0	0	0	0	0	0.388474	0	0	0	0	0	0	0	0	0	0	0	0	0	0	0	0	0	0	0	0	0	0	0	0	0	0	0	0	0	0	0	0	0	0
chr1_227040131_227147559_-	ENSG00000143776.18	CDC42BPA	chr1	227040131	227147559	-	ENST00000334218.9	24	7	0	0	0	0	0	0	0	0	0	0	0	0	0	0.186709	0	0	0	0	0	0	0	0	0	0	0	0	0	0	0	0	0	0	0	0	0	0	0	0	0	0
chr1_227040131_227101239_-	ENSG00000143776.18	CDC42BPA	chr1	227040131	227101239	-	ENST00000334218.9	24	15	0	0	0	0	0	0	0	0	0	0	0	0	0	0	0	0	0	0	0	0	0	0	0	0	0	0	0	0	0	0	0	0	0	0	0	0	0	0	0	0
chr1_227040131_227081017_-	ENSG00000143776.18	CDC42BPA	chr1	227040131	227081017	-	ENST00000334218.9	24	17	0	0	0	0	0	0	0	0	0	0	0	0	0	0	0	0	0	0	0	0	0	0	0	0	0	0	0	0	0	0	0	0	0	0	0	0.227166	0	0	0.719152	0
chr1_227040131_227069853_-	ENSG00000143776.18	CDC42BPA	chr1	227040131	227069853	-	ENST00000334218.9	24	21	0	0	0	0	0	0	0	0	0	0	0	0	0	0.168313	0	0.291251	0	0	0.457664	0	0	0	0	0	0	0	0	0	0	0	0	0	0	0	0	0	0	0	0	0
chr1_227040131_227048010_-	ENSG00000143776.18	CDC42BPA	chr1	227040131	227048010	-	ENST00000334218.9	24	23	0	0	0	0	0	0	0	0	0	0	0	0	0	0	0	0	0	0	0	0	0	0	0	0	0	0	0	0.26688	0	0	0	0	0	0	0	0	0	0	0.344189	0
chr1_227035471_227048010_-	ENSG00000143776.18	CDC42BPA	chr1	227035471	227048010	-	ENST00000334218.9	25	23	0	0	0	0	0	0	0	0	0	0	0	0	0	0.168313	0	0	0	0	0	0	0	0	0	0	0	0	0	0	0	0	0	0	0	0	0	0	0	0	0	0
chr1_227033334_227069853_-	ENSG00000143776.18	CDC42BPA	chr1	227033334	227069853	-	ENST00000334218.9	27	21	0	0	0	0	0	0	0	0	0	0	0	0	0	0	0	0	0	0	0.228832	0	0	0	0	0	0	0	0	0	0	0	0	0	0	0	0	0	0	0	0	0
chr1_227033334_227048010_-	ENSG00000143776.18	CDC42BPA	chr1	227033334	227048010	-	ENST00000334218.9	27	23	0	0	0	0	0	0	0	0	0	0	0	0	0	0.187263	0	0	0	0	0	0	0	0	0	0	0	0	0	0	0	0	0	0	0	0	0	0	0	0	0	0
chr1_227033334_227040236_-	ENSG00000143776.18	CDC42BPA	chr1	227033334	227040236	-	ENST00000334218.9	27	24	0	0	0	0	0	0	0	0	0	0	0	0	0	0	0	0	0	0	0	0	0	0	0	0	0	0	0	0	0	0	0	0	0	0	0	0	0	0	0	0
chr1_227030408_227139742_-	ENSG00000143776.18	CDC42BPA	chr1	227030408	227139742	-	ENST00000334218.9	29	10	0	0	0	0	0	0	0	0	0	0	0	0	0	0	0	0	0	0	0	0	0	0	0	0	0	0	0	0	0	0	0	0	0.451851	0	0	0	0	0	0	0
chr1_227030408_227069853_-	ENSG00000143776.18	CDC42BPA	chr1	227030408	227069853	-	ENST00000334218.9	29	21	0	0	0	0	0	0	0	0	0	0	0	0	0	0	0	0	0	0	0	0	0	0	0	0	0	0	0	0	0	0	0	0	0	0	0	0	0	0	0	0
chr1_227030408_227040236_-	ENSG00000143776.18	CDC42BPA	chr1	227030408	227040236	-	ENST00000334218.9	29	24	0	0	0	0	0	0	0	0	0	0	0	0	0	0	0	0	0	0	0	0	0	0	0	0	0	0	0	0.353169	0	0	0	0	0	0	0	0	0	0	0	0
chr1_227030408_227035607_-	ENSG00000143776.18	CDC42BPA	chr1	227030408	227035607	-	ENST00000334218.9	29	25	0	0	0	0	0	0	0	0	0	0	0	0.438693	0	0.186709	0	0	0.627556	0	0.457664	0	0.479282	0	0	0	0.583509	0	0.297039	0	0	0	0	0.505871	0	0.261939	0	0.216034	0	0.16834	0	0
chr1_227028657_227035607_-	ENSG00000143776.18	CDC42BPA	chr1	227028657	227035607	-	ENST00000334218.9	30	25	0	0.613268	0	0	0	0.388474	0	0	0	0	0	0	0	0.523335	0	0	0.273746	0	0.291262	0	0	0	0.898071	0	0	0	1.78856	0	0	0.561233	0	0.859673	0	0.523879	0.478793	0.571221	0	0	2.70957	0
chr1_227026055_227081017_-	ENSG00000143776.18	CDC42BPA	chr1	227026055	227081017	-	ENST00000334218.9	31	17	0	0	0	0	0	0.217621	0	0	0	0	0	0	0	0	0	0	0	0	0	0	0	0	0	0	0	0	0	0	0	0	0	0	0	0	0	0	0	0	0	0
chr1_227026055_227048010_-	ENSG00000143776.18	CDC42BPA	chr1	227026055	227048010	-	ENST00000334218.9	31	23	0.483388	0	0	0	0	0	0	0	0	0	0	0	0	0.186709	0	0	0	0	0	0.276051	0	0	0.310838	0.584256	0	0	0	0	0	0.280616	0	0.252936	0	0	0	0	0	0	0	0
chr1_227026055_227040236_-	ENSG00000143776.18	CDC42BPA	chr1	227026055	227040236	-	ENST00000334218.9	31	24	0	0	0	0	0	0	0	0	0	0	0	0.24094	0	0	0	0	0	0	0	0	0	0	0	0	0	0	0	0.3276	0	0	0	0	0	0	0	0	0	0	0	0
chr1_227026055_227035607_-	ENSG00000143776.18	CDC42BPA	chr1	227026055	227035607	-	ENST00000334218.9	31	25	0	0.306634	0	0	0.311608	1.16664	0.255961	0	0.281873	0	0	0	0	0.168313	0	0.582502	0	0	0.452239	0	0.262044	0	0	0.691177	0	0.322986	0.298068	0.26688	0	1.02026	0	0.252936	0.56721	0.377018	0.257402	0.659234	0	0.338014	1.135	0
chr1_227026055_227031514_-	ENSG00000143776.18	CDC42BPA	chr1	227026055	227031514	-	ENST00000334218.9	31	28	0	0	0	0	0	0	0	0	0	0	0	0	0	0	0	0	0	0	0	0	0	0	0	0	0	0	0	0	0	0	0	0	0	0	0	0	0	0	0	0
chr1_227023263_227048010_-	ENSG00000143776.18	CDC42BPA	chr1	227023263	227048010	-	ENST00000334218.9	32	23	0	0	0	0	0	0	0	0	0	0	0	0	0	0	0	0	0	0	0	0	0	0	0	0	0	0	0	0	0	0	0	0	0	0	0	0	0.292743	0	0	0
chr1_227023263_227035607_-	ENSG00000143776.18	CDC42BPA	chr1	227023263	227035607	-	ENST00000334218.9	32	25	0.270788	0	0	0	0	0	0	0	0	0	0	0.438693	0	0	0	0	0	0	0.912616	0	0	0	0	0	0	0	0	0.3276	0	0	0	0	0	0	0	0	0	0	0	0
chr1_227023263_227029250_-	ENSG00000143776.18	CDC42BPA	chr1	227023263	227029250	-	ENST00000334218.9	32	30	0	0	0	0	0	0	0	0	0	0	0	0	0	0	0	0	0	0	0	0	0	0	0	0	0	0	0	0	0	0	0	0	0	0	0	0	0	0	0.344189	0
chr1_227023263_227026152_-	ENSG00000143776.18	CDC42BPA	chr1	227023263	227026152	-	ENST00000334218.9	32	31	0	0	0	0	0	0	0	0	0	0	0	0	0	0	0	0	0	0	0	0	0	0.170444	0	0	0	0	0	0	0	0	0	0	0	0	0	0	0	0	0	0
chr1_227016080_227213219_-	ENSG00000143776.18	CDC42BPA	chr1	227016080	227213219	-	ENST00000334218.9	34	3	0	0	0	0	0	0	0	0	0	0	0	0	0	0	0	0	0	0	0	0	0	0	0	0	0	0	0	0	0	0	0	0	0	0	0	0	0	0	0	0
chr1_227016080_227199652_-	ENSG00000143776.18	CDC42BPA	chr1	227016080	227199652	-	ENST00000334218.9	34	4	0	0	0	0	0	0	0	0	0	0	0	0	0	0	0	0	0	0	0.228832	0	0	0	0	0	0	0	0	0	0	0	0	0	0	0	0	0	0	0	0	0
chr1_227016080_227069853_-	ENSG00000143776.18	CDC42BPA	chr1	227016080	227069853	-	ENST00000334218.9	34	21	0	0	0	0	0	0	0	0	0	0	0	0	0	0	0	0	0.263939	0	0	0	0	0	0	0	0	0	0	0	0	0	0	0	0	0	0	0	0	0	0	0
chr1_227016080_227048010_-	ENSG00000143776.18	CDC42BPA	chr1	227016080	227048010	-	ENST00000334218.9	34	23	0	0	0	0	0.712794	0.606096	0.320729	0.276959	0	0	0	0	0.620102	0	0	0	0	0	0	0.276051	0	0	0	0	0	0.322986	0	0	0	0	0	0	0	0.261939	0	0	0	0.183442	0	0.506118
chr1_227016080_227035607_-	ENSG00000143776.18	CDC42BPA	chr1	227016080	227035607	-	ENST00000334218.9	34	25	0	0	0.406021	0	0.224177	0	0.536854	0	0	0	0	0.963762	0	0.691648	0	0	0	0	0.683784	0	0.94872	0	0	0	0	0	0	0	0.595312	0.250246	0.547682	0	0	0	0	0.216034	0	0.902107	0.344189	0
chr1_227016080_227026152_-	ENSG00000143776.18	CDC42BPA	chr1	227016080	227026152	-	ENST00000334218.9	34	31	0	0	0	0	0	0	0	0	0	0	0.400444	0	0.345927	0	0	0	0	0.422015	0	0	0	0	0	0.424084	0	0	0	0	0	0	0	0	0	0	0	0	0	0	0	0
chr1_227016080_227023347_-	ENSG00000143776.18	CDC42BPA	chr1	227016080	227023347	-	ENST00000334218.9	34	32	0	0	0	0	0	0	0	0	0	0	0	0	0	0	1.11825	0	0	0	0	0	0	0	0	0	0	0.468839	0	0	0	0	0	0	0	0	0	0	0	0	0	0
chr1_227016080_227017050_-	ENSG00000143776.18	CDC42BPA	chr1	227016080	227017050	-	ENST00000334218.9	34	33	0	0	0	0	0	0	0	0	0	0	0	0	0	0	0	0	0	0	0	0	0	0	0	0	0	0	0	0	0	0	0	0	0	0	0	0	0	0	0	0
chr1_227004994_227112913_-	ENSG00000143776.18	CDC42BPA	chr1	227004994	227112913	-	ENST00000334218.9	35	13	0	0	0	0	0	0.256886	0	0	0	0	0	0	0	0	0	0	0	0	0	0	0	0	0	0	0	0	0	0	0	0	0	0	0	0	0	0	0	0	0	0
chr1_227004994_227048010_-	ENSG00000143776.18	CDC42BPA	chr1	227004994	227048010	-	ENST00000334218.9	35	23	0	0	0	0	0	0	0	0	0	0	0	0	0	0	0	0	0	0	0	0	0	0	0	0.399049	0	0	0	0	0	0	0	0	0	0	0	0	0	0	0	0
chr1_227004994_227035607_-	ENSG00000143776.18	CDC42BPA	chr1	227004994	227035607	-	ENST00000334218.9	35	25	0	0	0	0	0	0	0	0.506379	0.267055	0	0	1.04177	0	0.936317	0	0.291251	0.35381	0.422015	0.22612	0	0	0	0	0	0	0	0.496832	0.176584	1.0567	0.561233	0	0.505871	0	0	0.257402	0	0.292743	0	0	0.364473
chr1_227004994_227033415_-	ENSG00000143776.18	CDC42BPA	chr1	227004994	227033415	-	ENST00000334218.9	35	27	0	0	0	0	0	0	0.216125	0	0	0	0	0	0	0	0	0	0	0	0	0	0	0	0	0	0	0	0	0	0	0	0	0	0	0	0	0	0	0	0	0
chr1_227004994_227023347_-	ENSG00000143776.18	CDC42BPA	chr1	227004994	227023347	-	ENST00000334218.9	35	32	0	0	0	0	0	0	0	0	0	0	0	0	0	0	0	0	0	0	0	0	0.262044	0	0	0	0	0	0	0	0	0	0	0	0	0	0	0	0	0	0	0
chr1_227004994_227017050_-	ENSG00000143776.18	CDC42BPA	chr1	227004994	227017050	-	ENST00000334218.9	35	33	0.505471	0	1.1387	1.81393	2.18555	0	0.767883	0.45884	0.267055	0	0.400444	2.0389	0	2.93437	0.950096	2.16157	0.263939	1.86266	0	0	0	0	0	2.28059	1.75053	0	0.893175	0.655199	0	0.479757	0.547682	4.30039	0.88059	0.188509	0	0.864135	0	0	1.4383	0
chr1_226994823_227040236_-	ENSG00000143776.18	CDC42BPA	chr1	226994823	227040236	-	ENST00000334218.9	36	24	0	0	0	0	0	0	0	0	0	0	0	0	0	0	0	0	0	0	0	0	0	0	0	0	0	0	0	0	0	0	0	0	0	0	0.257402	0	0	0	0	0
chr1_226994823_227031514_-	ENSG00000143776.18	CDC42BPA	chr1	226994823	227031514	-	ENST00000334218.9	36	28	0	0	0	0	0	0	0	0	0	0	0	0	0	0	0	0	0	0	0	0	0	0	0	0	0	0	0	0	0	0	0	0	0	0	0	0	0	0	0	0
chr1_226994823_227017050_-	ENSG00000143776.18	CDC42BPA	chr1	226994823	227017050	-	ENST00000334218.9	36	33	0	0	0	0	0	0	0	0	0	0	0	0	0	0	0	0	0	0	0	0	0	0	0	0	0	0	0	0	0	0	0	0	0	0	0	0	0	0	0	0
chr1_226994823_227005111_-	ENSG00000143776.18	CDC42BPA	chr1	226994823	227005111	-	ENST00000334218.9	36	35	0	0	0	0	0	0	0.432249	0	0	0	0	0	0	0	0	0	0	0	0.291262	0	0.262044	0	0	0	0	0	0	0	0	0	0	0	0	0	0	0	0	0	0	0
chr1_227040131_227051985_-	ENSG00000143776.18	CDC42BPA	chr1	227040131	227051985	-	ENST00000366766.6	24	22	0	0	0	0	0	0	0	0	0	0	0	0	0	0	0	0	0	0	0	0	0	0	0	0	0	0	0	0	0	0	0	0	0	0	0	0	0	0	0	0
chr1_227033334_227051985_-	ENSG00000143776.18	CDC42BPA	chr1	227033334	227051985	-	ENST00000366766.6	27	22	0	0	0	0	0	0	0	0	0	0	0	0	0	0	0	0	0	0	0	0	0	0	0	0	0	0	0	0	0	0	0	0	0	0	0	0	0.447303	0	0	0
chr1_151054231_151055993_-	ENSG00000197622.12	CDC42SE1	chr1	151054231	151055993	-	ENST00000439374.6	7	5	0	0	0	0	0	0	0	0	0	0	0	0	0	0.168313	0	0	0	0	0	0	0	0	0	0	0	0	0	0	0	0	0	0	0	0	0	0	0	0.16834	0	0
chr1_151054231_151056786_-	ENSG00000197622.12	CDC42SE1	chr1	151054231	151056786	-	ENST00000492796.5	5	2	0	0	0	0	0	0	0	0	0	0	0	0	0.620102	0	0	0	0	0	0	0	0	0	0	0	0	0	0	0	0	0	0	0	0	0	0	0	0	0	0	0
chr1_91501654_91511923_+	ENSG00000097046.12	CDC7	chr1	91501654	91511923	+	ENST00000234626.10	2	6	0.270788	0	0	0	0	0	0	0	0	0	0	0	0	0	0	0	0	0	0	0	0	0	0	0	0	0	0	0	0	0	0	0	0	0	0	0	0	0	0	0
chr1_91501654_91514043_+	ENSG00000097046.12	CDC7	chr1	91501654	91514043	+	ENST00000234626.10	2	8	0	0	0	0	0	0	0	0	0	0	0	0	0	0	0	0	0	0	0	0	0	0	0	0	0	0	0	0	0	0	0	0	0	0	0	0	0	0	0	0
chr1_91501654_91515876_+	ENSG00000097046.12	CDC7	chr1	91501654	91515876	+	ENST00000234626.10	2	10	0	0	0	0	0	0	0	0	0	0	0	0	0	0	0	0	0	0	0	0	0	0	0.331496	0.399049	0	0	0	0	0	0	0	0	0	0	0	0	0	0	0	0
chr1_91501654_91520279_+	ENSG00000097046.12	CDC7	chr1	91501654	91520279	+	ENST00000234626.10	2	11	0	0	0	0	0	0	0	0	0	0	0	0	0	0	0	0	0	0	0	0	0	0	0	0	0.583509	0	0	0	0	0	0	0	0	0	0	0	0	0	0	1.77895
chr1_91507854_91508397_+	ENSG00000097046.12	CDC7	chr1	91507854	91508397	+	ENST00000234626.10	3	4	0	0	0	0	0	0.692129	0	0	0	0	0	0	0.285577	0	0	0	0	0.84403	0	0	0	0.187335	0	0	0	0	0	0	0.595312	0	0	0	0	0	0	0	0	0	0.359576	0
[truncated: 146,882 more rows]
[truncated: 20 more columns]
