# Supplementary material for: The Circular RNA Landscape of Non-Small Cell Lung Cancer Cells
Source: Cancers (Basel). 2020 Apr 28;12(5):1091. doi: 10.3390/cancers12051091 (PMC7281449; doi:10.3390/cancers12051091)
Supplement: Supplementary file 1 [file cancers-12-01091-s001.zip › Suppl Table S4 Differentially expressed circRNAs.xlsx]

## Sheet: Info
Supplementary Table S4
Differentially expressed circRNAs
In this file, we list the circRNAs (ENSG level) that are differentially expressed.
Each comparison based on different groupings of the cell lines is listed in a different tab.
For each analysis, only genes were included that were detected in at least one cell line in both groups. Hence, each tab contains a different amount of genes per tested condition.
These results are visualized in volcano plots in figure 9.
significance threshold: conservative multiple testing correction by Bonferroni, so that the threshold for significance is = 0.05 / number of lines in tab (number of genes tested)
# significant: number of significantly differentially expressed genes by T-test after Bonferroni correction for multiple testing

## Sheet: Tumor vs. non-transformed
Gene Name	Sum circRNA Tumor	# cell lines with circRNA T	Ave circRNA T	Sum circRNA non-transformed	# cell lines with circRNA non-transformed	Ave circRNA non-transformed	fold change	F-test	p-value T-test	log2 fold change	-log10 p-value		significance threshold (-log10 p)
		max 57			max 3								4.99467
RP11-29G8.3	116.398	52	2.04208	42.3136	3	14.1045	0.144782	0.102769	6.79547e-16	-2.78805	15.1678		# significant
FANCL	649.104	57	11.3878	8.34542	3	2.78181	4.09367	0.00131983	4.45992e-15	2.03339	14.3507		128
DNAH14	2691.64	57	47.2217	7.82181	2	2.60727	18.1116	0.0109125	6.08523e-14	4.17884	13.2157
NSUN2	286.509	56	5.02647	3.79553	3	1.26518	3.97293	0.00752808	5.67794e-13	1.9902	12.2458
SLMAP	412.381	56	7.23476	2.57474	3	0.858248	8.42968	0.00428469	1.31569e-11	3.07548	10.8808
SPICE1	134.127	55	2.35311	1.86612	3	0.62204	3.78289	0.00103947	1.73605e-11	1.91949	10.7604
PARN	291.976	56	5.12239	2.97454	3	0.991513	5.16624	0.0152649	2.67093e-11	2.36911	10.5733
TNFRSF21	2498.85	57	43.8396	9.79447	3	3.26482	13.4278	0.00672766	2.84245e-11	3.74716	10.5463
MEMO1	701.672	57	12.31	6.60535	3	2.20178	5.59094	0.0142396	4.1998e-11	2.48309	10.3768
MTHFD2L	1096.94	57	19.2446	4.84068	3	1.61356	11.9268	0.00144464	5.23584e-11	3.57613	10.281
RBM33	1315.57	57	23.0802	24.3285	3	8.1095	2.84607	0.0079098	5.82529e-11	1.50897	10.2347
ALMS1	223.062	57	3.91338	3.19577	3	1.06526	3.67365	0.00607743	6.53998e-11	1.87721	10.1844
OMA1	317.68	56	5.57334	3.06556	3	1.02185	5.45416	0.00879002	9.28201e-11	2.44736	10.0324
AGK	298.731	57	5.24089	0.494341	1	0.16478	31.8053	0.00747319	9.44985e-11	4.9912	10.0246
FGD6	1902.35	57	33.3746	27.0747	3	9.02491	3.69805	0.00641223	1.063e-10	1.88676	9.97347
PPM1B	235.104	57	4.12463	0.579614	1	0.193205	21.3485	0.0302698	2.2856e-10	4.41606	9.641
AXL	263.731	47	4.62686	44.7817	3	14.9272	0.309961	0.0422943	2.57768e-10	-1.68984	9.58877
SLTM	873.206	57	15.3194	8.19399	3	2.73133	5.60877	0.0204387	3.21147e-10	2.48768	9.4933
ADK	215.554	55	3.78165	0.547384	1	0.182461	20.7258	0.0263124	4.61781e-10	4.37335	9.33556
PDCD11	387.644	57	6.80077	8.58767	3	2.86256	2.37577	0.00668536	4.76271e-10	1.24839	9.32215
CELSR1	244.446	54	4.28852	0.406021	1	0.13534	31.6869	0.00649739	6.70227e-10	4.98582	9.17378
HNRNPC	536.234	57	9.40761	14.1289	3	4.70962	1.99753	0.000927698	8.04171e-10	0.998218	9.09465
MPP6	3274.71	57	57.4511	54.1593	3	18.0531	3.18234	0.0307377	1.31001e-09	1.67009	8.88273
FXR1	223.636	57	3.92343	0.583512	1	0.194504	20.1715	0.0215114	1.67922e-09	4.33425	8.77489
PATJ	486.155	55	8.52904	0.710155	1	0.236718	36.0303	0.00443502	2.45239e-09	5.17114	8.61041
ESYT2	1227.22	57	21.5301	21.4089	3	7.13629	3.01699	0.00925862	2.46437e-09	1.59311	8.60829
ZCCHC11	646.839	57	11.3481	14.6751	3	4.89171	2.31985	0.00863425	3.34748e-09	1.21403	8.47528
CCAR1	417.086	57	7.31729	6.66216	3	2.22072	3.29501	0.0210355	3.50242e-09	1.72028	8.45563
NUP107	134.736	56	2.36379	1.69718	3	0.565725	4.17834	0.014736	4.69581e-09	2.06293	8.32829
DENND1A	375.076	56	6.58028	1.48866	2	0.496218	13.2609	0.0270739	5.46848e-09	3.7291	8.26213
RNF10	148.361	57	2.60282	0.406021	1	0.13534	19.2316	0.0431667	5.6501e-09	4.26541	8.24794
PSMB1	176.211	56	3.09142	1.94447	3	0.648155	4.76957	0.00115659	6.40878e-09	2.25386	8.19322
MASTL	264.913	57	4.6476	4.30286	3	1.43429	3.24035	0.0282047	8.87227e-09	1.69615	8.05197
ZC3H6	111.703	52	1.95971	0.326655	1	0.108885	17.9979	0.0302927	9.46566e-09	4.16976	8.02385
PAK1	137.579	55	2.41367	1.75188	3	0.58396	4.13328	0.00630194	9.81945e-09	2.04729	8.00791
SOCS7	149.326	56	2.61976	0.406021	1	0.13534	19.3568	0.0184216	1.12032e-08	4.27477	7.95066
ATF1	165.459	55	2.90278	1.89719	3	0.632396	4.59013	0.00229509	1.31941e-08	2.19854	7.87962
LPAR1	1562.48	56	27.412	383.79	3	127.93	0.214273	0.578079	1.32954e-08	-2.22248	7.8763
MYO9A	459.618	57	8.06347	12.0253	3	4.00844	2.01162	0.00822072	2.55861e-08	1.00836	7.592
UQCC1	188.497	56	3.30697	0.547384	1	0.182461	18.1242	0.0205075	2.81439e-08	4.17985	7.55061
HEATR5B	156.059	56	2.73788	3.31722	3	1.10574	2.47606	0.00153369	2.84284e-08	1.30804	7.54625
PHIP	607.059	57	10.6502	6.5763	3	2.1921	4.85843	0.0439512	3.29495e-08	2.28049	7.48215
AMFR	259.374	57	4.55042	4.55891	3	1.51964	2.99442	0.0101346	5.10212e-08	1.58227	7.29225
ACBD6	323.688	57	5.67874	3.90338	3	1.30113	4.36449	0.00108052	5.16485e-08	2.12581	7.28694
ICA1	207.949	51	3.64822	0.326655	1	0.108885	33.5053	0.00403112	5.346e-08	5.06632	7.27197
TMPO	128.841	53	2.26037	1.49117	3	0.497056	4.54752	0.0108202	5.64148e-08	2.18508	7.24861
HSPA9	278.162	57	4.88004	3.10911	3	1.03637	4.70878	0.0370766	7.69988e-08	2.23535	7.11352
RNASEH2B	200.943	50	3.52531	0.583512	1	0.194504	18.1246	0.0174166	7.74324e-08	4.17988	7.11108
AC018633.4	358.342	57	6.2867	1.16702	1	0.389008	16.1608	0.0362764	7.74869e-08	4.01443	7.11077
ANLN	99.207	53	1.74047	0.326655	1	0.108885	15.9845	0.0341327	9.3337e-08	3.9986	7.02995
FUT8	1391.63	56	24.4145	9.84023	3	3.28008	7.44327	0.0113018	1.06778e-07	2.89594	6.97152
PIK3CB	213.365	57	3.74325	1.31619	2	0.438729	8.53202	0.0336938	1.18633e-07	3.09289	6.9258
EPG5	35.9934	43	0.631464	3.43021	3	1.1434	0.552267	0.00154163	1.57327e-07	-0.856561	6.8032
MBTPS2	121.38	52	2.12947	1.53557	3	0.511856	4.16028	0.0153958	1.57938e-07	2.05668	6.80151
SIPA1L1	525.138	56	9.21295	3.17729	2	1.0591	8.69888	0.0234349	2.12283e-07	3.12083	6.67308
RNF149	159.077	56	2.79083	0.985635	2	0.328545	8.49451	0.0305061	2.26589e-07	3.08653	6.64476
SBNO2	117.482	52	2.0611	0.326655	1	0.108885	18.9291	0.0132006	2.36166e-07	4.24253	6.62678
PLD1	133.506	51	2.34221	1.61883	3	0.539611	4.34056	0.00539417	2.45817e-07	2.11788	6.60939
MAP4K3	283.99	56	4.98228	4.61585	3	1.53862	3.23815	0.0283936	2.64686e-07	1.69517	6.57727
TMEM56	162.533	51	2.85146	0.494341	1	0.16478	17.3046	0.0168351	2.74736e-07	4.11308	6.56109
RFWD2	532.509	57	9.34226	9.29289	3	3.09763	3.01594	0.0275257	2.84759e-07	1.59261	6.54552
CLPX	94.8698	52	1.66438	0.326655	1	0.108885	15.2857	0.0461558	2.91548e-07	3.93411	6.53529
AKR1E2	252.253	47	4.42549	1.16061	2	0.386871	11.4392	0.00888151	3.0415e-07	3.51591	6.51691
SHANK2	282.809	47	4.96156	0.494341	1	0.16478	30.1101	0.00431943	3.10919e-07	4.91218	6.50735
AHSA1	94.7584	48	1.66243	0.326655	1	0.108885	15.2677	0.0271805	3.27139e-07	3.93241	6.48527
CD2AP	343.732	55	6.03038	2.70923	3	0.903077	6.6776	0.0172609	3.48557e-07	2.73933	6.45773
OSBPL10	225.238	54	3.95155	0.326655	1	0.108885	36.291	0.00286305	3.59657e-07	5.18154	6.44411
TFRC	139.908	54	2.45453	0.494341	1	0.16478	14.8958	0.0422006	3.63249e-07	3.89683	6.4398
EPT1	283.314	56	4.97043	4.69633	3	1.56544	3.17509	0.00513623	3.74732e-07	1.6668	6.42628
ACSL3	325.563	54	5.71164	3.87592	3	1.29197	4.42087	0.0273281	4.17099e-07	2.14433	6.37976
R3HDM1	589.697	56	10.3456	6.70826	3	2.23609	4.62664	0.0415643	4.26869e-07	2.20997	6.36971
CH17-260O16.1	7.49318	20	0.131459	2.55617	3	0.852056	0.154285	0.311673	4.83778e-07	-2.69633	6.31535
PDIA5	161.351	56	2.83072	0.583512	1	0.194504	14.5535	0.0388162	4.89062e-07	3.8633	6.31064
RHOF	163.286	51	2.86466	0.583512	1	0.194504	14.728	0.0299649	5.00145e-07	3.88049	6.3009
RP11-437B10.1	245.916	56	4.31432	3.13401	3	1.04467	4.12984	0.0283781	6.6817e-07	2.04609	6.17511
CHD6	408.129	57	7.16015	8.44339	3	2.81446	2.54406	0.0211999	6.91975e-07	1.34713	6.15991
HAT1	502.75	57	8.82017	6.45434	3	2.15145	4.09964	0.0231529	6.94725e-07	2.0355	6.15819
PDHX	428.104	57	7.51059	6.20129	3	2.0671	3.6334	0.0171321	6.9943e-07	1.86132	6.15526
RAB11FIP1	353.448	56	6.20084	2.59625	3	0.865416	7.16515	0.0117568	7.32057e-07	2.841	6.13546
WDR60	323.325	57	5.67237	2.11076	2	0.703588	8.06206	0.0379919	7.44614e-07	3.01115	6.12807
CPSF6	955.371	57	16.7609	13.0562	3	4.35207	3.85125	0.00370993	8.04593e-07	1.94533	6.09442
CABIN1	96.5769	52	1.69433	1.53302	3	0.511006	3.31568	0.0069247	8.78819e-07	1.7293	6.0561
METTL8	133.4	54	2.34035	1.56663	3	0.522212	4.48161	0.00334617	9.10837e-07	2.16402	6.04056
TBCD	717.046	57	12.5798	9.51651	3	3.17217	3.96566	0.00997684	9.36866e-07	1.98756	6.02832
TRIM24	218.019	55	3.82489	1.44283	2	0.480944	7.95289	0.0230936	9.81484e-07	2.99148	6.00812
LCLAT1	199.357	55	3.4975	4.21661	3	1.40554	2.48837	0.0261563	1.04697e-06	1.3152	5.98007
EIF3B	233.79	57	4.10157	3.90378	3	1.30126	3.152	0.0137673	1.15756e-06	1.65627	5.93646
POC1B	173.57	54	3.04509	1.04172	2	0.347242	8.76937	0.0158011	1.18778e-06	3.13247	5.92527
STAU2	427.594	57	7.50165	5.71159	3	1.90386	3.94022	0.038288	1.31929e-06	1.97828	5.87966
RAB27A	84.6917	50	1.48582	0.326655	1	0.108885	13.6457	0.0411953	1.40011e-06	3.77038	5.85384
ENGASE	153.037	52	2.68485	1.03532	2	0.345107	7.77978	0.0452326	1.42898e-06	2.95973	5.84497
AZIN1	217.803	56	3.82111	2.96724	3	0.989082	3.86329	0.0206264	1.91138e-06	1.94983	5.71865
NAPEPLD	134.024	52	2.3513	1.53557	3	0.511856	4.59367	0.00829686	1.98268e-06	2.19965	5.70275
RAD23B	548.761	57	9.62738	11.0685	3	3.68949	2.60941	0.046126	1.98867e-06	1.38372	5.70144
SETD3	1191	57	20.8948	32.5015	3	10.8338	1.92866	0.0235929	2.22162e-06	0.947597	5.65333
UXS1	333.218	49	5.84592	1.2103	1	0.403433	14.4904	0.0216009	2.29675e-06	3.85703	5.63889
RDX	134.889	53	2.36647	0.906269	2	0.30209	7.83365	0.0330282	2.44332e-06	2.96968	5.61202
MED13L	276.665	56	4.85376	3.64436	3	1.21479	3.99557	0.000554385	2.4935e-06	1.9984	5.60319
MTMR12	81.5152	47	1.43009	0.326655	1	0.108885	13.1339	0.0373459	2.58083e-06	3.71523	5.58824
RHEB	202.817	57	3.5582	2.98721	3	0.995737	3.57343	0.0299202	2.68877e-06	1.83731	5.57045
HAUS4	138.216	53	2.42484	0.989533	2	0.329844	7.35145	0.0478457	2.82746e-06	2.87803	5.5486
DTNBP1	85.9405	50	1.50773	0.326655	1	0.108885	13.847	0.0247818	2.84471e-06	3.7915	5.54596
SUMF1	338.905	55	5.94571	2.90914	3	0.969712	6.13142	0.00242781	3.10523e-06	2.61622	5.50791
AGFG1	279.866	55	4.90993	2.97724	3	0.992412	4.94748	0.00373058	3.41677e-06	2.30669	5.46638
DYM	334.902	57	5.87547	6.6562	3	2.21873	2.64812	0.0190703	3.44414e-06	1.40497	5.46292
C12orf45	143.042	54	2.5095	0.581	1	0.193667	12.9578	0.0333917	3.69711e-06	3.69575	5.43214
CCDC7	448.188	54	7.86295	5.74191	3	1.91397	4.10819	0.00797915	3.73946e-06	2.0385	5.42719
NCOR2	404.103	57	7.08953	8.55726	3	2.85242	2.48544	0.0239335	4.05801e-06	1.3135	5.39169
KDM4C	394.972	55	6.92933	8.4625	3	2.82083	2.45649	0.00397503	4.60179e-06	1.2966	5.33707
TIMMDC1	579.548	57	10.1675	14.9524	3	4.98414	2.03997	0.0124251	4.66364e-06	1.02855	5.33127
SNX13	896.914	57	15.7353	23.1672	3	7.72241	2.03762	0.0176848	4.85056e-06	1.02688	5.31421
FNDC3B	2626.88	57	46.0856	33.3156	3	11.1052	4.14992	0.0314142	4.90025e-06	2.05308	5.30978
FRYL	209.553	57	3.67637	5.24895	3	1.74965	2.10121	0.000521339	5.37208e-06	1.07122	5.26986
TIPARP	129.588	49	2.27348	0.910167	2	0.303389	7.49361	0.0330883	5.41556e-06	2.90566	5.26636
USP53	99.6168	48	1.74766	1.57053	3	0.523511	3.33835	0.00637086	6.17192e-06	1.73914	5.20958
ATP11B	119.327	54	2.09345	0.874039	2	0.291346	7.18544	0.0431191	6.32051e-06	2.84508	5.19925
EIF2AK1	76.9427	50	1.34987	0.326655	1	0.108885	12.3972	0.0363753	6.50017e-06	3.63194	5.18708
SMEK1	267.826	56	4.6987	6.1723	3	2.05743	2.28377	0.025942	6.81974e-06	1.19142	5.16623
RSRC1	1385.97	57	24.3154	28.9141	3	9.63802	2.52286	0.0483405	8.31045e-06	1.33506	5.08038
MPRIP	158.208	50	2.77559	1.58419	3	0.528065	5.25615	0.00654364	8.39991e-06	2.39401	5.07573
TEX10	358.218	57	6.28452	5.66435	3	1.88812	3.32846	0.0314306	8.78322e-06	1.73485	5.05635
DNAJB6	223.192	56	3.91565	4.47309	3	1.49103	2.62614	0.013792	8.88177e-06	1.39294	5.0515
PDXK	74.8044	49	1.31236	0.326655	1	0.108885	12.0527	0.0464845	8.88697e-06	3.59128	5.05125
DKC1	122.561	57	2.15019	0.906269	2	0.30209	7.11774	0.0447731	9.14992e-06	2.83142	5.03858
SSH2	273.214	57	4.79323	7.21204	3	2.40401	1.99385	0.00153677	9.36123e-06	0.995554	5.02867
CDYL	4358.5	57	76.4649	121.421	3	40.4738	1.88925	0.0281167	9.75059e-06	0.91781	5.01097
ZNF644	163.45	52	2.86754	0.406021	1	0.13534	21.1876	0.00643926	9.87653e-06	4.40515	5.0054
PIAS1	146.101	53	2.56317	2.18633	3	0.728776	3.51709	0.0356531	9.9011e-06	1.81438	5.00432
B3GNTL1	114.334	46	2.00586	0.406021	1	0.13534	14.8209	0.0154712	1.02669e-05	3.88956	4.98856
RASA2	163.273	55	2.86444	2.43929	3	0.813096	3.52288	0.0302426	1.04037e-05	1.81675	4.98281
EIF3A	115.301	53	2.02283	3.15826	3	1.05275	1.92147	0.0214297	1.07163e-05	0.942211	4.96996
NFKB1	139.809	50	2.45279	1.1309	2	0.376965	6.50666	0.0355614	1.10537e-05	2.70192	4.95649
CFLAR	297.427	56	5.21801	3.99392	3	1.33131	3.91947	0.00851924	1.24773e-05	1.97066	4.90388
DTNB	110.366	55	1.93625	0.494341	1	0.16478	11.7505	0.0386266	1.33996e-05	3.55465	4.87291
TRIT1	84.1274	53	1.47592	1.94159	3	0.647196	2.28048	0.00757201	1.36708e-05	1.18934	4.86421
RPS6KA3	76.3396	51	1.33929	1.45365	3	0.484551	2.76398	0.0362562	1.45438e-05	1.46675	4.83732
CERS6	180.302	54	3.1632	2.16519	3	0.721731	4.38279	0.0412524	1.62089e-05	2.13185	4.79025
TRAPPC6B	130.756	53	2.29396	1.07395	2	0.357985	6.40799	0.0346871	1.64563e-05	2.67987	4.78367
DOCK1	3116.86	57	54.6818	40.3866	3	13.4622	4.06188	0.0255037	1.65093e-05	2.02215	4.78227
GPATCH2L	350.657	56	6.15188	5.86108	3	1.95369	3.14884	0.0464061	1.85883e-05	1.65482	4.73076
ADAM32	201.065	54	3.52746	1.44775	2	0.482582	7.30955	0.0228979	1.93933e-05	2.86978	4.71235
MROH1	263.63	56	4.62509	3.86254	3	1.28751	3.59226	0.0297586	1.9638e-05	1.84489	4.7069
MGA	1476.93	57	25.911	45.9373	3	15.3124	1.69215	0.0196093	1.96441e-05	0.758862	4.70677
NEDD4L	184.526	52	3.23731	0.583512	1	0.194504	16.6439	0.0102294	2.14178e-05	4.05692	4.66923
RNF214	124.534	56	2.18481	3.72203	3	1.24068	1.76099	0.00181824	2.1504e-05	0.816384	4.66748
ARNTL2	374.031	56	6.56195	5.33169	3	1.77723	3.69223	0.0472753	2.16252e-05	1.88449	4.66504
BRWD1	834.551	57	14.6412	19.2892	3	6.42975	2.27711	0.037195	2.28501e-05	1.1872	4.64111
HOMER1	557.409	56	9.77911	5.70708	3	1.90236	5.14051	0.0485617	2.30874e-05	2.36191	4.63663
PRSS12	50.0054	31	0.877287	17.916	3	5.972	0.1469	0.234682	2.3871e-05	-2.76709	4.62213
TASP1	354.767	57	6.22399	7.07525	3	2.35842	2.63905	0.0244433	2.41774e-05	1.40002	4.61659
CWF19L2	339.179	55	5.95051	8.4592	3	2.81973	2.11031	0.0022501	2.51917e-05	1.07745	4.59874
PEX13	108.18	49	1.89789	1.48727	3	0.495756	3.82828	0.00867317	2.69778e-05	1.9367	4.56899
SEMA3C	991.073	54	17.3873	17.6745	3	5.8915	2.95124	0.00242952	3.03177e-05	1.56132	4.5183
STRN	103.832	52	1.82161	2.02736	3	0.675787	2.69554	0.0360433	3.05334e-05	1.43058	4.51522
MAP2K4	580.427	56	10.1829	16.3186	3	5.43953	1.87203	0.0127192	3.13227e-05	0.9046	4.50414
CD109	223.385	49	3.91903	0.979966	1	0.326655	11.9975	0.024349	3.35725e-05	3.58466	4.47402
SACS	42.9846	35	0.754117	10.353	3	3.45099	0.218522	0.312859	3.40397e-05	-2.19415	4.46801
AP1S3	92.8565	48	1.62906	0.406021	1	0.13534	12.0368	0.0239481	3.4145e-05	3.58938	4.46667
PPP6R3	855.314	57	15.0055	22.9064	3	7.63548	1.96523	0.0240805	3.46014e-05	0.9747	4.46091
EFCAB13	290.5	52	5.09649	4.73078	3	1.57693	3.23192	0.027815	3.56312e-05	1.69239	4.44817
KNTC1	342.623	57	6.01093	7.26424	3	2.42141	2.4824	0.045579	3.76685e-05	1.31174	4.42402
RHBDD1	527.01	57	9.24578	14.6212	3	4.87372	1.89707	0.0154538	3.84654e-05	0.923771	4.41493
PTK2	6996.54	57	122.746	205.627	3	68.5423	1.79081	0.0285747	3.85334e-05	0.840612	4.41416
DCAF10	7.97293	17	0.139876	2.50922	3	0.836406	0.167235	0.399117	3.99573e-05	-2.58005	4.3984
ZFHX3	180.321	57	3.16352	2.93247	3	0.97749	3.23637	0.032212	4.03768e-05	1.69438	4.39387
ADAMTS6	400.266	50	7.02221	122.032	3	40.6774	0.172632	0.690487	4.51718e-05	-2.53423	4.34513
SPAG5	44.094	42	0.77358	3.99424	3	1.33141	0.581021	0.0183483	4.64842e-05	-0.783338	4.33269
RIF1	106.354	54	1.86587	3.15826	3	1.05275	1.77237	0.0280283	4.74469e-05	0.82568	4.32379
ARHGAP26	517.267	56	9.07487	3.53985	2	1.17995	7.69089	0.0212252	4.9002e-05	2.94315	4.30979
CREB1	84.913	52	1.4897	1.94799	3	0.649331	2.29421	0.0374812	4.94043e-05	1.198	4.30624
EXOC6B	1543.38	57	27.0769	35.1641	3	11.7214	2.31004	0.0196565	5.15153e-05	1.20792	4.28806
NAV1	20.9314	26	0.367218	5.40066	3	1.80022	0.203985	0.860948	5.27361e-05	-2.29346	4.27789
RERE	1262.82	57	22.1547	22.665	3	7.55499	2.93246	0.0464576	5.45025e-05	1.55211	4.26358
MAML2	82.9952	44	1.45606	1.45755	3	0.48585	2.99692	0.0164691	5.65643e-05	1.58348	4.24746
AKAP9	145.816	54	2.55817	3.68621	3	1.22874	2.08195	0.00833783	6.67062e-05	1.05794	4.17583
CLNS1A	1023.36	57	17.9537	20.9261	3	6.97535	2.57388	0.0376897	6.90473e-05	1.36394	4.16085
VMP1	1236.29	57	21.6892	27.8775	3	9.2925	2.33406	0.015173	6.98793e-05	1.22284	4.15565
GIN1	63.7989	45	1.11928	0.326655	1	0.108885	10.2794	0.0428099	7.2878e-05	3.36169	4.1374
PAN3	370.453	56	6.49917	9.97548	3	3.32516	1.95454	0.0371013	7.33571e-05	0.966832	4.13456
FMNL2	142.354	50	2.49743	1.70325	3	0.567751	4.39882	0.000802112	7.81051e-05	2.13712	4.10732
GSE1	1030.85	56	18.0851	25.2746	3	8.42486	2.14663	0.0214012	7.83929e-05	1.10208	4.10572
NTN4	118.332	42	2.076	0.581	1	0.193667	10.7194	0.030796	7.8396e-05	3.42216	4.10571
PRKAR1B	615.088	56	10.791	2.28677	3	0.762255	14.1567	0.000796315	7.8752e-05	3.82341	4.10374
MFSD8	125.652	50	2.20443	3.57072	3	1.19024	1.85208	0.000641881	8.18527e-05	0.889148	4.08697
DDX17	240.196	57	4.21396	6.6694	3	2.22313	1.89551	0.040147	8.41318e-05	0.922584	4.07504
NR3C1	390.069	56	6.84332	8.25847	3	2.75282	2.48593	0.0365597	8.50347e-05	1.31378	4.0704
SNX7	83.9434	50	1.47269	1.62524	3	0.541745	2.71842	0.0014773	8.52014e-05	1.44277	4.06955
ZNFX1	118.153	54	2.07287	3.35821	3	1.1194	1.85176	0.0102739	8.69206e-05	0.888898	4.06088
SLK	289.911	54	5.08616	5.8973	3	1.96577	2.58737	0.024655	9.3139e-05	1.37149	4.03087
PIK3R3	237.935	50	4.17429	1.8997	2	0.633233	6.59203	0.0227017	9.60211e-05	2.72072	4.01763
RP11-598P20.5	358.604	57	6.2913	11.2202	3	3.74006	1.68214	0.014332	9.75091e-05	0.750298	4.01095
ZNF398	232.791	56	4.08405	3.68348	3	1.22783	3.32624	0.049018	0.000113424	1.73389	3.94529
SEPT9	393.588	57	6.90505	11.2101	3	3.7367	1.8479	0.033591	0.000117989	0.885887	3.92816
TRAF3	301.707	57	5.2931	10.0508	3	3.35027	1.5799	0.000390745	0.000120103	0.659836	3.92045
TSPAN15	184.788	45	3.2419	0.988682	1	0.329561	9.83704	0.0397704	0.00013846	3.29822	3.85867
SIRT5	249.496	55	4.37713	5.90768	3	1.96923	2.22276	0.0092069	0.000142317	1.15235	3.84674
AHR	175.557	46	3.07996	1.40061	2	0.46687	6.59703	0.0189406	0.000142397	2.72182	3.8465
KDM1A	1011.81	57	17.7511	32.7908	3	10.9303	1.62403	0.00962188	0.00014249	0.699575	3.84622
ZDBF2	474.545	52	8.32536	3.58762	2	1.19587	6.96174	0.0218742	0.000143499	2.79945	3.84315
C2orf42	186.177	55	3.26627	4.23225	3	1.41075	2.31527	0.0207809	0.000147903	1.21118	3.83002
RP11-245J9.9	698.934	57	12.262	19.4975	3	6.49916	1.88671	0.0382972	0.000147918	0.91587	3.82998
AFG3L2	314.694	57	5.52095	6.51615	3	2.17205	2.54181	0.0416046	0.000149246	1.34586	3.8261
ATP2B1	234.387	56	4.11206	3.10471	3	1.0349	3.97337	0.0441491	0.000149969	1.99036	3.824
ATF2	149.181	54	2.6172	3.01049	3	1.0035	2.60809	0.0488933	0.000150935	1.38299	3.82121
TBPL1	70.3218	51	1.23372	1.49117	3	0.497056	2.48205	0.0427564	0.000158913	1.31153	3.79884
RUNX1	59.3568	43	1.04135	0.326655	1	0.108885	9.56372	0.0458838	0.000163378	3.25757	3.78681
TTC33	73.7735	51	1.29427	0.406021	1	0.13534	9.56308	0.0451404	0.000165924	3.25748	3.78009
ZDHHC2	8.95026	15	0.157022	3.22833	3	1.07611	0.145917	0.56122	0.00017911	-2.77678	3.74688
CEP112	188.427	54	3.30573	1.62272	2	0.540908	6.11145	0.0469381	0.000180431	2.61151	3.74369
CABYR	298.018	49	5.22838	1.15923	1	0.386409	13.5307	0.012152	0.000183289	3.75816	3.73686
RUNX2	73.4786	36	1.2891	0.326655	1	0.108885	11.8391	0.0173152	0.000190025	3.56548	3.72119
SNX11	146.619	53	2.57225	3.7322	3	1.24407	2.06762	0.0149178	0.000215486	1.04797	3.66658
PHF21A	222.132	46	3.89705	1.89013	2	0.630044	6.18536	0.0356436	0.00021654	2.62886	3.66446
NBEA	115.253	45	2.02197	1.16061	2	0.386871	5.22648	0.0404173	0.000218512	2.38584	3.66053
LPGAT1	366.318	54	6.42664	2.78377	2	0.927925	6.92582	0.0330376	0.000233016	2.79198	3.63261
GOLIM4	113.594	53	1.99287	1.127	2	0.375666	5.30491	0.035122	0.000237071	2.40733	3.62512
MBP	150.112	49	2.63355	0.406021	1	0.13534	19.4587	0.00495514	0.000240061	4.28235	3.61968
TBC1D22A	184.057	54	3.22907	3.9664	3	1.32213	2.44232	0.022025	0.000250156	1.28825	3.60179
LPCAT1	101.07	49	1.77316	0.581	1	0.193667	9.15574	0.0497365	0.000251648	3.19468	3.59921
EXOC6	170.354	56	2.98867	3.70564	3	1.23521	2.41956	0.0451644	0.000301279	1.27474	3.52103
CLSPN	77.6327	50	1.36198	1.98551	3	0.661836	2.05788	0.0290483	0.00030336	1.04116	3.51804
SNX27	558.713	57	9.80198	6.81693	3	2.27231	4.31366	0.0382125	0.000338073	2.10891	3.47099
PTGR1	1000.86	57	17.559	13.06	3	4.35334	4.03345	0.00857305	0.000343486	2.01201	3.46409
CCDC91	805.24	57	14.127	12.8915	3	4.29715	3.28753	0.0367883	0.000344067	1.717	3.46336
BAZ1A	695.79	57	12.2068	10.1958	3	3.39862	3.59171	0.00520997	0.00034409	1.84467	3.46333
CCDC14	189.794	56	3.32972	6.69227	3	2.23076	1.49264	0.0217892	0.000345672	0.577869	3.46134
NRF1	155.546	57	2.72888	5.27511	3	1.75837	1.55193	0.0412451	0.000357942	0.634068	3.44619
ARHGAP12	1815.98	57	31.8593	58.2186	3	19.4062	1.64171	0.034471	0.000358138	0.715196	3.44595
CD46	72.2098	44	1.26684	0.406021	1	0.13534	9.36039	0.0330398	0.000371468	3.22657	3.43008
FAM135A	163.066	53	2.86081	0.547384	1	0.182461	15.679	0.007412	0.000395444	3.97076	3.40291
MAN2A1	465.825	57	8.17237	12.2389	3	4.07963	2.00321	0.0392205	0.00041647	1.00231	3.38042
GALNT18	69.1632	42	1.21339	0.406021	1	0.13534	8.96546	0.0390145	0.000428399	3.16438	3.36815
SMAD2	651.921	56	11.4372	10.51	3	3.50334	3.26466	0.0157232	0.000450134	1.70693	3.34666
RP11-327J17.3	18.9416	24	0.332309	4.98093	3	1.66031	0.200149	0.741901	0.000487788	-2.32085	3.31177
LRCH3	979.704	57	17.1878	32.6013	3	10.8671	1.58164	0.0270279	0.000512786	0.661417	3.29006
EIF2AK4	83.0011	54	1.45616	6.76125	3	2.25375	0.646106	0.0442715	0.000525731	-0.630157	3.27924
STRN3	767.896	57	13.4719	15.1359	3	5.0453	2.67018	0.0405038	0.000599115	1.41694	3.22249
PRUNE	160.984	51	2.82427	1.48136	2	0.493787	5.71961	0.0230339	0.000621415	2.51592	3.20662
LIMCH1	137.825	45	2.41798	0.653311	1	0.21777	11.1034	0.0160159	0.000624664	3.47292	3.20435
DIP2B	99.2939	49	1.742	1.07395	2	0.357985	4.86612	0.0391229	0.000626223	2.28277	3.20327
PDE4D	460.38	51	8.07684	4.3648	3	1.45493	5.55135	0.023734	0.000685188	2.47284	3.16419
LATS2	61.3425	43	1.07618	5.58089	3	1.8603	0.578501	0.0227591	0.0007725	-0.789609	3.1121
FBXL13	124.446	51	2.18326	1.75188	3	0.58396	3.73871	0.00222813	0.000781009	1.90254	3.10734
SETDB1	142.23	55	2.49526	2.07468	3	0.69156	3.60817	0.0469701	0.000794314	1.85127	3.10001
RAPGEF2	170.814	55	2.99674	1.71051	2	0.57017	5.25587	0.0482501	0.000796302	2.39393	3.09892
AOX1	5.47727	11	0.0960925	1.89329	3	0.631097	0.152263	0.216946	0.000804175	-2.71537	3.09465
THSD4	216.756	48	3.80274	1.85781	2	0.619269	6.1407	0.0173277	0.000851288	2.6184	3.06992
STAU1	124.471	56	2.18371	2.61091	3	0.870303	2.50914	0.0478801	0.000879064	1.32719	3.05598
STK3	1004.76	57	17.6273	21.2356	3	7.07852	2.49025	0.0259949	0.000896691	1.31629	3.04736
PAWR	158.314	54	2.77743	2.55921	3	0.853072	3.2558	0.0486875	0.000909894	1.70301	3.04101
GTPBP4	70.2739	52	1.23288	1.97655	3	0.658851	1.87125	0.0353047	0.000951782	0.904002	3.02146
TNKS	75.6778	42	1.32768	1.45755	3	0.48585	2.73269	0.0132185	0.000975672	1.45032	3.0107
EFCAB11	66.3149	43	1.16342	1.81392	3	0.604641	1.92415	0.00245664	0.000996328	0.94422	3.0016
AC093642.5	21.7644	35	0.381831	1.81782	3	0.605941	0.630146	0.0167713	0.00104109	-0.666242	2.98251
SKA3	262.99	54	4.61386	6.88337	3	2.29446	2.01087	0.0359606	0.0010418	1.00782	2.98221
EFR3A	210.219	56	3.68806	6.15877	3	2.05292	1.79649	0.0373562	0.00110565	0.845182	2.95638
RUSC2	100.244	52	1.75867	16.4216	3	5.47388	0.321285	0.225366	0.00120919	-1.63808	2.9175
TTC6	77.4687	40	1.3591	0.494341	1	0.16478	8.24795	0.036072	0.00123677	3.04404	2.90771
ARHGAP32	429.059	57	7.52734	7.24491	3	2.41497	3.11695	0.0366344	0.00126946	1.64014	2.89638
KATNA1	76.245	52	1.33763	2.11215	3	0.70405	1.89991	0.0174121	0.0012738	0.92593	2.8949
GFM2	102.032	52	1.79004	7.61473	3	2.53824	0.705227	0.0375886	0.0012835	-0.50384	2.8916
RIMS2	300.452	41	5.27109	1.87718	1	0.625726	8.42396	0.0316911	0.00134239	3.0745	2.87212
GMIP	59.3363	48	1.04099	9.29717	3	3.09906	0.335905	0.289724	0.00145893	-1.57388	2.83596
MRC2	38.5736	31	0.67673	9.10783	3	3.03594	0.222906	0.984498	0.00149748	-2.16549	2.82464
CRIM1	1849.51	57	32.4475	240.379	3	80.1262	0.404955	0.431646	0.00150853	-1.30417	2.82145
DNAH11	50.171	30	0.880192	0.326655	1	0.108885	8.08368	0.0355366	0.00156813	3.01501	2.80462
MGEA5	257.012	57	4.50898	28.5917	3	9.53057	0.473107	0.0932653	0.0015987	-1.07976	2.79623
ALG8	229.661	55	4.02914	2.05531	2	0.685102	5.88109	0.0252621	0.00160382	2.55608	2.79484
NSMCE1	6.86013	16	0.120353	1.56663	3	0.522212	0.230468	0.412525	0.00170243	-2.11736	2.76893
PGD	114.146	47	2.00256	1.25754	2	0.419179	4.77734	0.0294827	0.00172688	2.25621	2.76274
DMXL1	106.519	54	1.86875	3.65162	3	1.21721	1.53528	0.00496555	0.00180531	0.618499	2.74345
POMT1	167.41	49	2.93701	1.97907	2	0.659689	4.45212	0.0461331	0.00182179	2.15449	2.7395
GCLM	139.201	52	2.44212	0.710155	1	0.236718	10.3166	0.0150818	0.00184343	3.36689	2.73437
CAMSAP2	236.862	55	4.15548	6.90902	3	2.30301	1.80437	0.0453132	0.00189917	0.851496	2.72144
MCTP2	610.005	49	10.7018	5.59006	2	1.86335	5.74332	0.0205026	0.0020667	2.52189	2.68472
ANKS1B	120.612	39	2.116	0.906269	2	0.30209	7.00456	0.0103497	0.00207137	2.80829	2.68374
FN1	49.3534	32	0.86585	15.7062	3	5.23541	0.165383	0.179003	0.0020727	-2.59611	2.68346
WDR78	340.969	53	5.98192	6.88171	3	2.2939	2.60775	0.0270697	0.0020918	1.3828	2.67948
SLC20A1	66.2788	34	1.16279	0.326655	1	0.108885	10.679	0.0132787	0.00212155	3.41671	2.67335
COCH	88.3217	32	1.5495	0.326655	1	0.108885	14.2306	0.00659137	0.00215447	3.83093	2.66666
SYNRG	136.183	55	2.38917	4.14812	3	1.38271	1.7279	0.0472364	0.00215753	0.789019	2.66604
ITGB5	153.045	49	2.68501	1.28261	2	0.427536	6.28019	0.0107997	0.0021764	2.65081	2.66226
KMT2C	936.019	57	16.4214	34.0038	3	11.3346	1.44878	0.0409584	0.00227711	0.534843	2.64262
NAB1	779.219	57	13.6705	25.9393	3	8.64644	1.58106	0.020383	0.0022902	0.660888	2.64013
PTPRM	421.525	49	7.39517	7.40488	3	2.46829	2.99607	0.0190867	0.00230405	1.58307	2.63751
AKR1A1	107.809	47	1.89139	1.28261	2	0.427536	4.42393	0.03352	0.00240151	2.14533	2.61952
NHS	57.0744	37	1.00131	0.406021	1	0.13534	7.39842	0.0442478	0.00245943	2.88722	2.60917
KANSL1L	427.84	57	7.50596	8.43951	3	2.81317	2.66815	0.0499708	0.00248895	1.41584	2.60398
MGAT5B	70.387	36	1.23486	0.406021	1	0.13534	9.1241	0.0195225	0.00254624	3.18968	2.5941
HDAC4	180.013	53	3.15812	1.79242	2	0.597475	5.28579	0.0228491	0.00269989	2.40212	2.56865
GNB4	81.4614	42	1.42915	13.3429	3	4.44764	0.321327	0.607138	0.00274603	-1.63789	2.56129
SMARCA4	93.1323	46	1.6339	1.07534	2	0.358447	4.55828	0.0286527	0.00275452	2.18849	2.55995
NAP1L1	77.3976	51	1.35785	2.19152	3	0.730506	1.85879	0.0328757	0.00277053	0.89436	2.55744
ST3GAL5	124.107	44	2.17732	2.41096	3	0.803652	2.70928	0.0145022	0.00279662	1.43791	2.55337
ITFG1	59.1142	48	1.03709	1.7855	3	0.595165	1.74253	0.0284555	0.00280525	0.801181	2.55203
FOXK1	56.0824	44	0.983903	1.57053	3	0.523511	1.87943	0.0205903	0.00293138	0.910296	2.53293
ADD3	75.5721	45	1.32583	1.85967	3	0.619891	2.1388	0.00707759	0.00298917	1.0968	2.52445
PCCA	379.315	57	6.65465	30.8702	3	10.2901	0.646705	0.0316089	0.00305139	-0.62882	2.5155
SLC8A1	607.678	47	10.661	156.015	3	52.0049	0.205	0.551362	0.00306637	-2.2863	2.51338
GATAD2B	88.8337	47	1.55849	1.16061	2	0.386871	4.02844	0.0480416	0.00333488	2.01022	2.47692
DENND4A	217.906	56	3.82292	7.58695	3	2.52898	1.51164	0.0362252	0.0034416	0.596116	2.46324
GRAMD1B	107.749	31	1.89033	1.29115	2	0.430385	4.39219	0.0310045	0.0034967	2.13494	2.45634
FRMD6	27.1928	31	0.477068	5.19789	3	1.73263	0.275343	0.313093	0.00353942	-1.8607	2.45107
LRRC34	3.15575	6	0.055364	1.16451	2	0.388171	0.142628	0.0674659	0.00355725	-2.80967	2.44889
NPEPPS	533.845	57	9.3657	18.609	3	6.20299	1.50987	0.0147669	0.00365778	0.594422	2.43678
PIP5K1A	216.629	56	3.80051	3.33073	3	1.11024	3.42313	0.0267819	0.00383908	1.77532	2.41577
TRPM7	358.448	57	6.28857	14.1847	3	4.72822	1.33001	0.0141331	0.00388053	0.411433	2.41111
BNC2	118.984	28	2.08744	26.381	3	8.79368	0.237379	0.0576527	0.00398174	-2.07474	2.39993
UBXN6	2.84604	7	0.0499306	0.953405	2	0.317802	0.157112	0.0540442	0.00419241	-2.67013	2.37754
PTPRJ	55.5764	44	0.975025	1.45365	3	0.484551	2.01222	0.0380873	0.0042064	1.00879	2.37609
ZNF608	337.498	50	5.92102	3.20809	3	1.06936	5.53696	0.0196373	0.00424399	2.46909	2.37223
RELB	141.934	50	2.49008	4.22617	3	1.40872	1.76761	0.0231281	0.00445754	0.821802	2.3509
PLCB4	45.6852	36	0.801496	8.21872	3	2.73957	0.292562	0.553601	0.00453324	-1.77318	2.34359
NIT2	11.4073	23	0.200128	2.19742	3	0.732474	0.273221	0.139111	0.00494887	-1.87186	2.30549
COL1A1	3.51888	8	0.0617348	1.1309	2	0.376965	0.163768	0.076074	0.0051233	-2.61028	2.29045
PDIA3	131.854	54	2.31322	4.21247	3	1.40416	1.64741	0.0408323	0.00558905	0.7202	2.25266
VEGFC	212.476	45	3.72764	39.7435	3	13.2478	0.281378	0.244542	0.00559863	-1.82942	2.25192
TRMT1L	10.7616	22	0.188801	2.11518	3	0.70506	0.267779	0.289443	0.00561898	-1.90088	2.25034
ZC3H13	178.296	53	3.12801	5.93905	3	1.97968	1.58006	0.0372516	0.00562571	0.659975	2.24982
MBOAT2	1374.99	57	24.1226	38.8968	3	12.9656	1.86051	0.0167719	0.00565187	0.895701	2.24781
TMCC2	14.431	20	0.253176	3.07889	3	1.0263	0.246689	0.284251	0.00574208	-2.01923	2.24093
GAS2L3	56.8918	46	0.998103	1.56663	3	0.522212	1.9113	0.0149232	0.00580915	0.934554	2.23589
CTTN	238.131	55	4.17773	2.54731	2	0.849102	4.92018	0.0487709	0.0058539	2.29871	2.23255
HSDL2	140.701	56	2.46845	4.51535	3	1.50512	1.64004	0.0404152	0.00683023	0.713727	2.16556
ZFHX4	22.3424	10	0.391972	7.08111	3	2.36037	0.166064	0.883273	0.0068642	-2.59019	2.16341
ATG16L1	61.2356	47	1.07431	1.86357	3	0.621191	1.72943	0.0148622	0.00711497	0.7903	2.14783
USP14	208.837	57	3.66381	7.85447	3	2.61816	1.39939	0.00799553	0.00720323	0.484795	2.14247
RALY	187.108	53	3.2826	6.5354	3	2.17847	1.50684	0.0164067	0.00739958	0.591525	2.13079
MYBL1	366.905	54	6.43692	10.6932	3	3.56439	1.8059	0.037203	0.00817122	0.852714	2.08771
SLF2	361.436	57	6.34099	22.7075	3	7.56917	0.837739	0.012291	0.0084035	-0.255428	2.07554
NSMAF	51.5993	47	0.90525	1.70325	3	0.567751	1.59445	0.0119331	0.00852224	0.673058	2.06945
CYP24A1	14487	56	254.157	0.406021	1	0.13534	1877.91	2.15117e-07	0.009571	10.8749	2.01904
PTGES3	287.387	56	5.04188	2.82882	2	0.942939	5.34698	0.308962	0.00979261	2.41872	2.0091
ABHD2	591.281	56	10.3733	16.7567	3	5.58556	1.85717	0.0382317	0.00986465	0.893106	2.00592
MET	1019.58	56	17.8874	5.89112	2	1.96371	9.10897	0.00361951	0.00988451	3.18729	2.00504
TRPC6	3.44263	3	0.060397	1.79242	2	0.597475	0.101087	0.101779	0.00998347	-3.30633	2.00072
WDR20	295.786	55	5.18923	10.8003	3	3.60009	1.44142	0.0346724	0.0103409	0.527487	1.98544
CORO1C	1736.15	57	30.4589	162.777	3	54.2591	0.561359	0.541489	0.0107409	-0.833004	1.96896
LMTK2	356.299	56	6.25087	8.15393	3	2.71798	2.29982	0.01393	0.0108451	1.20152	1.96477
DENND5B	534.269	56	9.37315	11.3026	3	3.76754	2.48787	0.0426123	0.011629	1.31491	1.93446
REPS1	454.883	57	7.9804	15.2059	3	5.06864	1.57446	0.0437819	0.0117079	0.65486	1.93152
HELZ	89.7752	51	1.575	3.43276	3	1.14425	1.37645	0.00822195	0.0118341	0.460951	1.92686
MED15	71.1629	40	1.24847	0.906269	2	0.30209	4.13279	0.0307349	0.0120266	2.04712	1.91986
CPS1	141.51	21	2.48263	0.494341	1	0.16478	15.0663	0.00368985	0.0121232	3.91325	1.91638
STARD10	38.2166	30	0.670467	0.326655	1	0.108885	6.15756	0.0411865	0.012365	2.62236	1.90781
CEP250	53.709	50	0.942263	1.85967	3	0.619891	1.52005	0.0303098	0.0123822	0.604115	1.9072
DPYD	179.731	47	3.15317	3.39964	3	1.13321	2.78251	0.0236693	0.0124398	1.47639	1.90519
HDAC9	309.379	45	5.4277	0.579614	1	0.193205	28.093	0.000945825	0.0132498	4.81214	1.87779
NEXN	7.14873	7	0.125416	2.47035	2	0.82345	0.152306	0.186273	0.0141977	-2.71496	1.84778
UBE3A	1381.98	57	24.2452	11.0417	3	3.68057	6.58736	0.062358	0.0145534	2.7197	1.83704
IGF1R	342.313	55	6.0055	8.85358	3	2.95119	2.03494	0.00993394	0.0146293	1.02499	1.83478
TRUB2	5.40651	16	0.0948511	1.07534	2	0.358447	0.264617	0.0811362	0.0147214	-1.91802	1.83205
ATRNL1	361.493	39	6.34199	2.15299	2	0.717662	8.83702	0.00365522	0.0147466	3.14356	1.83131
GDI2	1170.35	57	20.5325	49.196	3	16.3987	1.25208	0.0343899	0.015052	0.324332	1.82241
TOGARAM1	206.891	57	3.62967	2.16622	3	0.722072	5.02675	0.0800059	0.015267	2.32963	1.81625
METTL22	6.16641	15	0.108183	1.25754	2	0.419179	0.258082	0.0838494	0.0157771	-1.9541	1.80197
DCLRE1C	44.9196	47	0.788063	5.56121	3	1.85374	0.425122	0.200257	0.0161288	-1.23405	1.7924
THSD1	79.6422	46	1.39723	12.2701	3	4.09003	0.341619	0.595708	0.0161587	-1.54954	1.79159
DROSHA	417.421	56	7.32318	3.70544	3	1.23515	5.92899	0.052385	0.016681	2.56779	1.77778
APBB2	326.013	57	5.71953	11.1041	3	3.70137	1.54525	0.00369768	0.0169343	0.627839	1.77123
KCNH1	82.1745	23	1.44166	1.1309	2	0.376965	3.82438	0.0256289	0.0175725	1.93523	1.75517
MOB3A	11.1929	19	0.196366	2.78724	3	0.929079	0.211356	0.339046	0.0178715	-2.24225	1.74784
FGFR1OP2	7.61886	13	0.133664	1.708	2	0.569332	0.234774	0.056143	0.0182348	-2.09066	1.7391
COPG1	56.8976	48	0.998203	6.36573	3	2.12191	0.470426	0.127455	0.0189083	-1.08796	1.72335
PPP1R13B	288.636	57	5.06378	3.36003	2	1.12001	4.52119	0.28327	0.0193943	2.1767	1.71233
BRE	120.602	50	2.11583	0.406021	1	0.13534	15.6334	0.00291944	0.0194003	3.96656	1.71219
ANKRD13A	49.8539	46	0.874629	6.13924	3	2.04641	0.427396	0.593677	0.0194524	-1.22635	1.71103
MID1	323.643	53	5.67794	4.47058	3	1.49019	3.8102	0.00107891	0.0195992	1.92987	1.70776
ABCC4	551.26	55	9.67122	76.9001	3	25.6334	0.37729	0.449298	0.0197068	-1.40625	1.70538
NUPL2	326.701	57	5.73159	3.39408	3	1.13136	5.06611	0.0545893	0.0197151	2.34088	1.7052
TCF12	120.688	56	2.11733	1.67102	2	0.557008	3.80126	0.04714	0.0201891	1.92648	1.69488
CASK	137.458	50	2.41154	1.48866	2	0.496218	4.85983	0.025218	0.0202515	2.28091	1.69354
PDE3A	86.372	21	1.5153	0.710155	1	0.236718	6.40127	0.0268918	0.0204414	2.67836	1.68949
GRK5	3.34402	8	0.0586669	0.907655	2	0.302552	0.193907	0.111653	0.0205085	-2.36656	1.68807
ACAD11	52.0033	47	0.912338	1.89719	3	0.632396	1.44267	0.0244323	0.0206132	0.52874	1.68585
SCP2	21.4205	32	0.375798	3.30769	3	1.10256	0.34084	0.933267	0.0207089	-1.55283	1.68384
FAM120A	1169.08	57	20.5102	25.3164	3	8.43878	2.43047	0.0853858	0.0208135	1.28124	1.68166
SPAST	250.769	56	4.39946	1.2103	1	0.403433	10.9051	0.113719	0.0208272	3.44693	1.68137
NDUFA10	764.12	57	13.4056	8.66676	3	2.88892	4.64035	0.102076	0.0209514	2.21423	1.67879
TACC1	66.3688	42	1.16436	9.66875	3	3.22292	0.361277	0.292359	0.0218911	-1.46882	1.65973
RABEP1	214.808	57	3.76857	2.87112	2	0.957041	3.93773	0.339425	0.0220444	1.97736	1.6567
SLC20A2	77.1853	44	1.35413	5.68667	3	1.89556	0.71437	0.0213247	0.0221376	-0.485257	1.65487
DAD1	4.15509	10	0.0728963	0.985635	2	0.328545	0.221876	0.142906	0.0225773	-2.17217	1.64633
YTHDF2	204.618	54	3.58978	23.4383	3	7.81278	0.459476	0.746458	0.0230731	-1.12194	1.63689
GORASP2	5.31816	13	0.0933011	1.07534	2	0.358447	0.260293	0.136698	0.0236055	-1.94179	1.62699
RPS6KB1	117.295	54	2.0578	0.987021	2	0.329007	6.25458	0.105831	0.0237411	2.64491	1.6245
AVL9	92.6555	54	1.62554	0.547384	1	0.182461	8.90893	0.167454	0.0239956	3.15525	1.61987
SOX5	9.56581	8	0.167821	3.54045	2	1.18015	0.142203	0.164957	0.0247073	-2.81397	1.60717
ISPD	300.148	52	5.26575	6.51634	3	2.17211	2.42425	0.00849055	0.0248511	1.27754	1.60465
CHD7	602.953	57	10.5781	2.43613	1	0.812043	13.0266	0.0726398	0.0254428	3.70338	1.59444
EYA4	64.2399	32	1.12702	1.66611	3	0.55537	2.02931	0.0318287	0.0254901	1.02099	1.59363
DNAJB14	10.0373	26	0.176093	1.52966	2	0.509887	0.345358	0.052908	0.025582	-1.53384	1.59207
MYO9B	451.059	57	7.91332	46.2631	3	15.421	0.513151	0.189265	0.025741	-0.962545	1.58938
SOBP	118.007	31	2.0703	0.629299	1	0.209766	9.86956	0.00747881	0.0260103	3.30299	1.58486
PSMD1	251.901	57	4.41932	2.79056	3	0.930186	4.75101	0.0614537	0.0262848	2.24823	1.58029
SLC12A2	169.325	52	2.97062	2.87247	3	0.957491	3.10251	0.0114191	0.0273281	1.63343	1.56339
UBE2K	753.61	57	13.2212	29.5895	3	9.86316	1.34047	0.0480819	0.0277416	0.422734	1.55687
TRPS1	189.449	45	3.32366	2.87112	2	0.957041	3.47285	0.0350718	0.0287706	1.79612	1.54105
HIF1A	283.691	56	4.97704	11.3473	3	3.78244	1.31583	0.0084464	0.0289194	0.39597	1.53881
EZH1	150.638	56	2.64277	0.987021	2	0.329007	8.03256	0.0554018	0.0292963	3.00586	1.53319
TMCC1	242.833	54	4.26023	1.98802	2	0.662673	6.42885	0.0910524	0.029989	2.68456	1.52304
RNF13	3013.39	57	52.8666	45.7955	3	15.2652	3.46322	0.168328	0.0301202	1.79211	1.52114
N4BP2L2	471.057	57	8.26415	42.0647	3	14.0216	0.589389	0.227248	0.0301421	-0.762707	1.52083
ORC2	125.827	55	2.2075	1.31368	2	0.437892	5.04119	0.153342	0.0304283	2.33376	1.51672
MAPKAP1	434.456	57	7.62204	15.8684	3	5.28946	1.44099	0.0202549	0.0304382	0.527056	1.51658
RABGAP1	194.526	56	3.41274	7.79605	3	2.59868	1.31326	0.034201	0.0304445	0.393148	1.51649
ERICH1	51.8431	32	0.909528	0.494341	1	0.16478	5.51964	0.0365429	0.0306954	2.46457	1.51293
XPOT	111.91	57	1.96333	0.547384	1	0.182461	10.7602	0.101644	0.0310609	3.42764	1.50779
TMTC1	95.5478	23	1.67628	21.3752	3	7.12507	0.235265	0.182933	0.032162	-2.08764	1.49266
KDM4B	290.484	57	5.09622	12.1536	3	4.05119	1.25796	0.00028548	0.0321621	0.331081	1.49266
CPT1C	10.0024	14	0.17548	2.70259	3	0.900864	0.194791	0.334034	0.0322572	-2.36	1.49137
ACACA	418.166	57	7.33625	5.7405	3	1.9135	3.83394	0.0647559	0.0322847	1.93883	1.491
GPBP1	363.698	57	6.38066	4.37976	3	1.45992	4.37055	0.164746	0.0325937	2.12782	1.48687
SMARCC1	816.168	57	14.3187	14.3368	3	4.77892	2.99623	0.093144	0.0330081	1.58315	1.48138
LUC7L2	125.341	56	2.19896	0.547384	1	0.182461	12.0517	0.0773986	0.0335555	3.59116	1.47424
SLC7A11	57.3559	26	1.00624	0.583512	1	0.194504	5.17338	0.0443511	0.0344119	2.37111	1.46329
RCCD1	9.54146	19	0.167394	1.56663	3	0.522212	0.320548	0.239007	0.0350185	-1.64139	1.4557
TXLNG2P	45.2061	18	0.793089	0.406021	1	0.13534	5.85996	0.0270639	0.0351141	2.55089	1.45452
CCT3	284.983	57	4.99969	3.378	3	1.126	4.44022	0.108846	0.0353008	2.15063	1.45222
THADA	307.361	56	5.3923	3.21199	2	1.07066	5.03641	0.142228	0.0358267	2.33239	1.44579
MAPK9	835.683	57	14.6611	16.1972	3	5.39907	2.71549	0.208322	0.0358965	1.44121	1.44495
UGGT1	230.836	57	4.04975	3.8536	3	1.28453	3.1527	0.321632	0.036496	1.65659	1.43775
DGKI	15.2285	23	0.267166	2.88719	2	0.962397	0.277605	0.149417	0.0367414	-1.8489	1.43484
COX5A	261.609	57	4.58964	2.70394	3	0.901313	5.09217	0.119954	0.0372664	2.34828	1.42868
EVC2	68.1339	25	1.19533	11.4474	3	3.8158	0.313258	0.404276	0.0379067	-1.67458	1.42128
AFF3	15.2958	8	0.268347	5.04119	3	1.6804	0.159692	0.636221	0.0380653	-2.64663	1.41947
AP2B1	160.642	56	2.81827	1.77695	2	0.592317	4.75805	0.192264	0.0388597	2.25037	1.4105
SLC25A13	146.248	53	2.56576	0.955954	2	0.318651	8.05194	0.0585143	0.0388926	3.00934	1.41013
TTC13	315.196	57	5.52975	3.51073	2	1.17024	4.7253	0.204261	0.0396796	2.24041	1.40143
CNOT1	352.998	57	6.19294	6.27659	3	2.0922	2.96002	0.321784	0.0399311	1.56561	1.39869
SUPT3H	89.0147	50	1.56166	2.4729	3	0.824301	1.89453	0.0369137	0.0399962	0.921838	1.39798
PPP1R12B	143.967	56	2.52574	1.56097	2	0.520322	4.85419	0.172197	0.040437	2.27923	1.39322
RPAP2	459.344	57	8.05866	6.74081	3	2.24694	3.58651	0.0594077	0.0405248	1.84258	1.39228
VRK2	445.883	57	7.8225	3.05668	2	1.01889	7.67746	0.088692	0.0405986	2.94063	1.39149
SYT1	56.7658	31	0.995892	0.547384	1	0.182461	5.4581	0.0315634	0.0409578	2.4484	1.38766
RBM22	5.07938	14	0.0891119	0.989533	2	0.329844	0.270164	0.186522	0.0414454	-1.8881	1.38252
SPPL3	423.093	56	7.42269	6.67767	3	2.22589	3.33471	0.254176	0.041728	1.73756	1.37957
PDE1C	48.4278	21	0.849611	12.5909	3	4.19697	0.202434	0.216596	0.0420296	-2.30448	1.37644
PLCB3	3.53578	7	0.0620312	0.906269	2	0.30209	0.20534	0.215615	0.0422557	-2.28391	1.37411
SUPT20H	81.0418	52	1.42179	0.494341	1	0.16478	8.62837	0.145026	0.0424628	3.10909	1.37199
CYLD	16.8798	26	0.296137	2.39879	3	0.799595	0.370358	0.5204	0.0427055	-1.43301	1.36952
LTBP2	30.1568	24	0.529066	5.42233	2	1.80744	0.292716	0.0719691	0.0427146	-1.77243	1.36942
SUZ12	392.228	57	6.88119	5.09987	3	1.69996	4.04786	0.316782	0.0431243	2.01716	1.36528
CD276	18.9771	27	0.332931	2.78586	3	0.928618	0.358523	0.222619	0.043492	-1.47986	1.36159
KTN1	371.439	57	6.51647	4.24604	1	1.41535	4.60415	0.569493	0.0435588	2.20293	1.36092
KIAA0195	5.9754	15	0.104832	1.07395	2	0.357985	0.292838	0.203776	0.0440662	-1.77182	1.35589
IDE	266.57	57	4.67666	4.70161	3	1.5672	2.98408	0.0935215	0.0460251	1.57728	1.337
C2CD3	146.807	56	2.57556	1.53695	2	0.512318	5.02726	0.243358	0.0462398	2.32977	1.33498
DNAJC2	204.116	56	3.58098	1.94298	2	0.647658	5.52912	0.117746	0.0463995	2.46705	1.33349
VEZT	196.986	56	3.4559	3.4824	3	1.1608	2.97717	0.155603	0.0464356	1.57394	1.33315
GNPAT	4.90232	11	0.0860055	1.03681	2	0.345603	0.248856	0.126859	0.0465907	-2.00662	1.3317
CBWD1	90.9221	55	1.59512	0.579614	1	0.193205	8.25614	0.153288	0.0468433	3.04547	1.32935
FAM114A1	31.6889	35	0.555945	4.09894	2	1.36631	0.406894	0.0577045	0.0469174	-1.29728	1.32867
EXOC2	231.792	57	4.06653	8.87829	3	2.95943	1.37409	0.021021	0.047319	0.458478	1.32496
SLC30A6	187.091	55	3.2823	2.82839	2	0.942796	3.48146	0.637246	0.0483079	1.79969	1.31598
CDR2	116.768	54	2.04856	8.09206	3	2.69735	0.759472	0.0437172	0.0489442	-0.396932	1.3103
UTP18	286.841	56	5.0323	2.15571	2	0.718569	7.00323	0.0574006	0.0489532	2.80802	1.31022
ASXL2	198.825	57	3.48815	3.77682	2	1.25894	2.7707	0.605434	0.0490927	1.47025	1.30898
TBC1D14	434.53	57	7.62334	5.27665	3	1.75888	4.3342	0.0545778	0.0491247	2.11576	1.3087
SVEP1	15.8014	16	0.277217	3.38948	2	1.12983	0.245363	0.138295	0.0497237	-2.02701	1.30344
BANP	1034.69	57	18.1524	19.2928	3	6.43094	2.82266	0.395675	0.0501689	1.49706	1.29957
RPTOR	154.177	54	2.70486	1.50079	2	0.500263	5.40688	0.163815	0.0502839	2.4348	1.29857
REV1	738.453	57	12.9553	17.0744	3	5.69148	2.27627	0.470646	0.0504294	1.18667	1.29732
NR2C2	94.3674	51	1.65557	3.83488	3	1.27829	1.29514	0.0383591	0.0507989	0.373107	1.29415
TOPBP1	135.88	56	2.38386	0.900362	1	0.300121	7.94301	0.160501	0.0512626	2.98969	1.2902
MEIS3	231.036	33	4.05326	37.5777	3	12.5259	0.32359	0.901436	0.0512659	-1.62776	1.29017
ZNF680	97.3504	51	1.7079	0.406021	1	0.13534	12.6193	0.0585013	0.0518445	3.65756	1.2853
SORT1	36.6875	40	0.643641	4.13802	3	1.37934	0.466629	0.596507	0.0518885	-1.09965	1.28493
RACGAP1	267.791	57	4.69809	4.52818	2	1.50939	3.11257	0.402682	0.0523757	1.6381	1.28087
SCAMP1	237.588	56	4.1682	1.79201	1	0.597336	6.97798	0.211533	0.0523829	2.80281	1.28081
MED13	556.029	57	9.75489	13.1914	3	4.39714	2.21846	0.950418	0.0526938	1.14956	1.27824
DIS3L2	191.199	57	3.35436	3.03504	2	1.01168	3.31564	0.659175	0.0527413	1.72929	1.27785
KIF20B	712.96	57	12.5081	17.8657	3	5.95523	2.10035	0.507624	0.0527523	1.07063	1.27776
PTBP3	1008.37	57	17.6906	16.6688	3	5.55627	3.1839	0.340707	0.0527653	1.6708	1.27765
GPR89A	242.618	57	4.25645	3.31642	3	1.10547	3.85035	0.0566865	0.053057	1.94499	1.27526
ZMYM4	851.171	57	14.9328	39.3274	3	13.1091	1.13912	0.00701476	0.0530821	0.187914	1.27505
CEP290	90.9821	55	1.59618	0.406021	1	0.13534	11.7938	0.0669132	0.0530968	3.55996	1.27493
ANO10	71.5784	49	1.25576	7.3492	3	2.44973	0.512612	0.0963734	0.0531964	-0.964062	1.27412
SRBD1	624.71	57	10.9598	8.52101	3	2.84034	3.85864	0.309133	0.0533511	1.94809	1.27286
GPR89B	195.294	57	3.4262	1.64199	1	0.547331	6.25984	0.265373	0.0540889	2.64612	1.26689
COMMD1	61.5335	46	1.07954	2.06487	3	0.688291	1.56843	0.0472268	0.054392	0.64932	1.26447
NID2	16.3222	10	0.286355	4.0556	2	1.35187	0.211822	0.360124	0.0545477	-2.23908	1.26322
SOX6	42.2182	24	0.74067	8.28817	2	2.76272	0.268094	0.0835856	0.0546118	-1.89919	1.26271
UBXN2A	331.915	57	5.82308	4.51891	3	1.5063	3.86581	0.32872	0.0547539	1.95077	1.26158
TAF2	312.545	57	5.48324	6.29463	3	2.09821	2.61329	0.161898	0.0548557	1.38587	1.26078
ADAM17	124.646	56	2.18678	0.820996	1	0.273665	7.9907	0.153697	0.0548722	2.99832	1.26065
CREB3L2	81.9318	41	1.4374	6.02506	3	2.00835	0.715711	0.0280623	0.0550451	-0.482552	1.25928
AMBRA1	438.323	57	7.68988	8.28708	3	2.76236	2.78381	0.0620633	0.055062	1.47706	1.25915
DHX8	99.7932	56	1.75076	0.988682	1	0.329561	5.3124	0.378544	0.0553171	2.40936	1.25714
PTTG1IP	224.947	51	3.94643	25.5574	3	8.51913	0.463244	0.366609	0.0558303	-1.11016	1.25313
HERC1	313.72	57	5.50385	29.5954	3	9.86512	0.55791	0.504156	0.0560551	-0.841895	1.25139
RASGRF2	73.2308	23	1.28475	15.6086	2	5.20288	0.246931	0.329813	0.0561641	-2.01782	1.25054
RPN2	274.629	57	4.81806	4.00224	3	1.33408	3.61152	0.352724	0.0565217	1.85261	1.24778
CHST15	244.698	52	4.29295	1.3947	1	0.464901	9.23412	0.11033	0.0566713	3.20697	1.24664
EDIL3	24.8984	14	0.436815	5.91891	2	1.97297	0.2214	0.390455	0.0568675	-2.17528	1.24514
GLCE	52.4783	42	0.920672	0.953405	2	0.317802	2.897	0.0458297	0.0570983	1.53456	1.24338
PPP1R21	187.617	57	3.29153	1.7563	2	0.585432	5.62239	0.117195	0.0571542	2.49118	1.24295
NPLOC4	286.165	57	5.02044	4.58497	3	1.52832	3.28493	0.150076	0.0574147	1.71586	1.24098
EMC2	410.474	55	7.2013	3.81041	3	1.27014	5.6697	0.105561	0.057541	2.50327	1.24002
PTPN4	338.555	57	5.93957	3.15398	2	1.05133	5.64958	0.175712	0.0577081	2.49814	1.23876
TRNT1	247.083	57	4.3348	4.78288	2	1.59429	2.71895	0.67467	0.0578706	1.44305	1.23754
PHF14	296.719	57	5.20559	3.36606	2	1.12202	4.63948	0.138766	0.0580999	2.21396	1.23582
SEL1L	15.7046	32	0.275519	1.99513	2	0.665043	0.414287	0.100017	0.0583513	-1.2713	1.23395
GOLPH3	397.851	55	6.97984	5.34781	3	1.7826	3.91553	0.104462	0.0583906	1.96921	1.23366
RGMB	4.41961	10	0.077537	0.910167	2	0.303389	0.25557	0.22159	0.0585022	-1.96821	1.23283
SOS1	54.1042	49	0.949196	0.326655	1	0.108885	8.71741	0.123022	0.0587943	3.1239	1.23066
ADAL	57.8021	49	1.01407	0.406021	1	0.13534	7.49274	0.171315	0.0590451	2.90549	1.22882
DRAM1	23.3134	29	0.409007	3.88982	2	1.29661	0.315444	0.122549	0.0591935	-1.66454	1.22773
BCAT1	41.3162	31	0.724846	6.12164	3	2.04055	0.355222	0.836472	0.0592765	-1.49321	1.22712
UBN2	160.396	55	2.81397	2.82342	2	0.94114	2.98996	0.459395	0.0605438	1.58012	1.21793
CXorf23	123.389	54	2.16471	0.989533	2	0.329844	6.56283	0.0646209	0.0611593	2.71432	1.21354
TBL1XR1	79.6697	53	1.39771	0.579614	1	0.193205	7.23437	0.182046	0.0612409	2.85487	1.21296
RACK1	63.8993	48	1.12104	0.326655	1	0.108885	10.2956	0.0839345	0.0612821	3.36396	1.21267
RAI14	27.6633	32	0.48532	3.8096	2	1.26987	0.382182	0.155725	0.0614259	-1.38767	1.21165
SMC2	9.33922	20	0.163846	1.53607	2	0.512022	0.319998	0.147829	0.0617676	-1.64387	1.20924
SUZ12P	146.647	54	2.57275	0.653311	1	0.21777	11.814	0.062101	0.0617989	3.56243	1.20902
FNBP4	154.974	55	2.71885	2.73626	3	0.912087	2.98091	0.0684309	0.0620111	1.57575	1.20753
ZBTB38	77.6175	43	1.36171	10.4782	3	3.49272	0.389871	0.989061	0.0620876	-1.35893	1.207
CCDC138	150.688	56	2.64365	1.31534	1	0.438446	6.0296	0.271008	0.0622382	2.59206	1.20594
ZFAND6	678.417	57	11.9021	13.8598	3	4.61995	2.57623	0.10455	0.062671	1.36526	1.20293
COA1	225.378	56	3.954	3.10334	2	1.03445	3.82233	0.234256	0.0628213	1.93445	1.20189
CD163L1	179.741	30	3.15334	1.16702	1	0.389008	8.10612	0.00807157	0.0628476	3.01901	1.20171
UBAP2	3512.31	57	61.6195	98.7805	3	32.9268	1.87141	0.231544	0.0630088	0.904123	1.2006
CSRP2BP	4.52854	11	0.0794481	0.874039	2	0.291346	0.272693	0.236461	0.0630277	-1.87465	1.20047
YES1	66.4215	51	1.16529	0.406021	1	0.13534	8.61006	0.122232	0.0631366	3.10602	1.19972
GTF2I	325.995	56	5.71921	3.92892	3	1.30964	4.36701	0.0982565	0.0632696	2.12665	1.1988
SENP2	161.912	56	2.84056	2.47256	2	0.824185	3.44651	0.48912	0.0634859	1.78514	1.19732
ZEB1	362.373	48	6.35742	49.4777	3	16.4926	0.385472	0.196026	0.0635679	-1.3753	1.19676
CREB3L1	28.3347	16	0.497101	6.19971	2	2.06657	0.240544	0.149422	0.0637843	-2.05563	1.19529
DHX9	57.4558	51	1.008	0.579614	1	0.193205	5.21725	0.370187	0.0638794	2.38329	1.19464
FGFR1	77.2106	33	1.35457	14.2406	3	4.74687	0.285361	0.222565	0.0642168	-1.80914	1.19235
PTPRU	52.1741	39	0.915335	1.65495	3	0.551652	1.65926	0.00237774	0.0642335	0.730542	1.19224
LCOR	76.6607	50	1.34493	0.579614	1	0.193205	6.96115	0.193816	0.0642892	2.79933	1.19186
LZIC	413.138	56	7.24803	7.3527	3	2.4509	2.95729	0.212833	0.0643054	1.56428	1.19175
CIT	127.107	57	2.22994	2.36046	3	0.786821	2.83412	0.110545	0.0643135	1.5029	1.1917
NCAPG	279.412	57	4.90196	2.68752	2	0.89584	5.47191	0.145301	0.0643282	2.45205	1.1916
TBXAS1	6.81018	13	0.119477	1.21281	2	0.40427	0.295537	0.303027	0.0645918	-1.75859	1.18982
PNPT1	125.115	55	2.19501	0.820996	1	0.273665	8.02077	0.140653	0.0652211	3.00374	1.18561
PRIMPOL	56.5727	48	0.992503	6.10742	3	2.03581	0.487523	0.778279	0.0655765	-1.03646	1.18325
USP9Y	52.371	19	0.91879	0.494341	1	0.16478	5.57585	0.0215786	0.0663286	2.47919	1.1783
MARK3	152.151	57	2.66931	3.15249	3	1.05083	2.54019	0.164814	0.0668032	1.34494	1.1752
MCM4	57.7303	49	1.01281	0.326655	1	0.108885	9.30166	0.100106	0.0672218	3.21749	1.17249
EYA3	195.95	57	3.43772	4.061	3	1.35367	2.53956	0.107448	0.0674736	1.34458	1.17087
AASS	64.9238	39	1.13901	9.6973	3	3.23243	0.35237	0.735721	0.068429	-1.50484	1.16476
APPBP2	88.926	51	1.56011	1.04172	2	0.347242	4.49285	0.138897	0.0693111	2.16763	1.1592
UBXN4	128.694	56	2.25779	2.29286	3	0.764286	2.95411	0.150966	0.0693238	1.56272	1.15912
NDC1	154.375	54	2.70833	2.94533	2	0.981776	2.7586	0.898292	0.0697331	1.46394	1.15656
ATL2	107.17	51	1.88017	0.910167	2	0.303389	6.19722	0.0779276	0.0699935	2.63162	1.15494
NIPBL	397.2	57	6.96842	6.87703	3	2.29234	3.03987	0.105732	0.07081	1.60401	1.14991
AC007000.7	125.103	55	2.19478	0.710155	1	0.236718	9.27172	0.0982226	0.0708241	3.21284	1.14982
URI1	515.604	57	9.04569	5.96498	2	1.98833	4.5494	0.143281	0.0709831	2.18568	1.14885
KIF11	102.643	55	1.80075	1.94938	2	0.649793	2.77127	0.511434	0.0712856	1.47055	1.147
MTR	307.56	57	5.39579	7.47739	3	2.49246	2.16484	0.427454	0.0720206	1.11426	1.14254
ERP44	83.4202	49	1.46351	0.579614	1	0.193205	7.57494	0.151908	0.0721278	2.92123	1.1419
APPL1	111.661	48	1.95896	0.547384	1	0.182461	10.7363	0.0703143	0.0729234	3.42443	1.13713
NEK1	298.89	57	5.24368	4.76454	3	1.58818	3.30169	0.256099	0.0731863	1.72321	1.13557
ATRX	280.206	57	4.91589	5.74733	3	1.91578	2.56601	0.109856	0.0732689	1.35952	1.13508
WIPI2	41.3526	43	0.725485	1.62524	3	0.541745	1.33916	0.00744287	0.0733027	0.421331	1.13488
TXNRD1	2980.25	57	52.285	5.87027	2	1.95676	26.7202	0.00013308	0.0733379	4.73986	1.13467
TSNAX	131.227	52	2.30223	1.743	1	0.581	3.96254	0.64257	0.0734429	1.98643	1.13405
TMEM245	808.388	57	14.1822	18.7432	3	6.24773	2.26998	0.217802	0.0734808	1.18268	1.13383
KDM6A	64.9895	50	1.14017	0.581	1	0.193667	5.88726	0.26345	0.0739733	2.5576	1.13092
GPBP1L1	271.928	55	4.77067	4.9961	2	1.66537	2.86464	0.482287	0.0745366	1.51835	1.12763
NLN	110.547	54	1.93942	1.71051	2	0.57017	3.40149	0.366575	0.074567	1.76617	1.12745
DHX35	89.1801	49	1.56456	0.581	1	0.193667	8.07864	0.129366	0.0747535	3.01411	1.12637
CDR1-AS	213.211	35	3.74054	35.5335	2	11.8445	0.315804	0.297644	0.0748479	-1.6629	1.12582
MAP4K5	117.994	55	2.07007	2.32123	2	0.773742	2.6754	0.51612	0.0753094	1.41975	1.12315
TOM1L1	98.026	55	1.71975	1.07785	2	0.359284	4.78661	0.115264	0.0753561	2.25901	1.12288
NOLC1	127.479	53	2.23648	1.162	1	0.387333	5.77404	0.271602	0.0759832	2.52958	1.11928
RALGAPB	94.8698	54	1.66438	0.989533	2	0.329844	5.04596	0.108182	0.076	2.33513	1.11919
TM9SF3	347.057	57	6.08871	6.45408	3	2.15136	2.83017	0.113374	0.0764092	1.50089	1.11685
RFWD3	258.925	55	4.54254	3.32934	3	1.10978	4.0932	0.0646164	0.0764119	2.03323	1.11684
MIA2	400.795	56	7.0315	6.46358	3	2.15453	3.26359	0.0787498	0.0765331	1.70646	1.11615
SCAPER	185.204	56	3.24919	2.60649	3	0.868831	3.73972	0.0589123	0.0765397	1.90293	1.11611
RIOK3	9.73088	19	0.170717	1.49117	3	0.497056	0.343457	0.403715	0.0770023	-1.5418	1.1135
RBM25	73.0321	53	1.28126	0.989533	2	0.329844	3.88445	0.205483	0.0774526	1.95771	1.11096
HNRNPM	335.192	57	5.88056	5.27519	3	1.7584	3.34428	0.110007	0.0777044	1.74169	1.10955
CNOT6	205.809	57	3.61068	4.38917	3	1.46306	2.4679	0.150732	0.0785944	1.30329	1.10461
STXBP4	111.341	53	1.95335	0.494341	1	0.16478	11.8543	0.0545702	0.0786198	3.56733	1.10447
DCAF5	132.876	54	2.33116	1.97907	2	0.659689	3.53373	0.260026	0.0788011	1.82119	1.10347
SDHA	72.7062	48	1.27555	0.326655	1	0.108885	11.7146	0.0558076	0.0790817	3.55024	1.10192
NAA15	82.0567	51	1.43959	0.987021	2	0.329007	4.37557	0.150054	0.0792386	2.12947	1.10106
WAPL	258.798	57	4.54031	6.79348	3	2.26449	2.005	0.513816	0.079258	1.0036	1.10096
SENP5	101.764	53	1.78533	0.583512	1	0.194504	9.17891	0.0947139	0.0792964	3.19832	1.10075
CCDC66	581.047	57	10.1938	10.1879	2	3.39597	3.00174	0.378144	0.0796519	1.5858	1.0988
VRK1	1430.73	57	25.1005	35.1764	3	11.7255	2.14068	0.231343	0.080092	1.09807	1.09641
DDI2	180.875	57	3.17325	2.46384	2	0.82128	3.86379	0.330013	0.0803053	1.95002	1.09526
BIRC6	1749.93	57	30.7005	54.9167	3	18.3056	1.67711	0.207286	0.0806349	0.745981	1.09348
TOP2A	358.815	57	6.295	2.98725	2	0.99575	6.32187	0.0647803	0.0807279	2.66035	1.09298
AMMECR1L	16.6562	31	0.292214	2.03381	3	0.677936	0.431034	0.21512	0.0815554	-1.21413	1.08855
FANCD2	84.9351	56	1.49009	0.900362	1	0.300121	4.96497	0.368384	0.0817618	2.31178	1.08745
MRPL47	79.2578	50	1.39049	0.710155	1	0.236718	5.87402	0.251409	0.0820018	2.55435	1.08618
WDR43	315.058	57	5.52734	6.08005	3	2.02668	2.72728	0.289631	0.0820259	1.44746	1.08605
CEP85	407.312	57	7.14582	8.91453	3	2.97151	2.40478	0.436447	0.0820498	1.2659	1.08592
KIF2C	374.335	57	6.56728	5.29378	3	1.76459	3.7217	0.196732	0.0821457	1.89596	1.08542
DPY19L1	555.995	56	9.75429	7.05579	2	2.35193	4.14735	0.168623	0.0821549	2.05219	1.08537
C11orf80	192.589	55	3.37876	2.45994	2	0.819981	4.12054	0.27881	0.0825605	2.04283	1.08323
AP3S2	104.586	50	1.83483	0.494341	1	0.16478	11.135	0.0605705	0.0832505	3.47703	1.07961
RP11-354P17.9	34.4368	27	0.604155	5.11643	3	1.70548	0.354244	0.50162	0.0835022	-1.49719	1.0783
RP11-823P9.1	87.8662	54	1.54151	0.732677	1	0.244226	6.31184	0.211782	0.0835085	2.65806	1.07827
SFMBT1	132.032	52	2.31635	1.14765	1	0.382551	6.05501	0.232545	0.0835187	2.59813	1.07822
ETFA	1066.08	57	18.7032	21.5342	3	7.17805	2.60561	0.224473	0.0839459	1.38162	1.076
MAP3K1	329.144	56	5.77446	12.4142	3	4.13808	1.39545	0.0444858	0.0851692	0.480726	1.06972
TFB2M	49.3467	51	0.865731	0.326655	1	0.108885	7.95086	0.124651	0.0857478	2.99111	1.06678
SLC30A7	145.641	53	2.5551	14.2888	3	4.76294	0.536455	0.689242	0.0869254	-0.898471	1.06085
KIF23	143.996	56	2.52624	2.62901	2	0.876338	2.88272	0.690501	0.0869542	1.52743	1.06071
DEPDC1B	220.11	55	3.86158	3.02774	1	1.00925	3.82619	0.642042	0.0874592	1.93591	1.05819
SPAG9	495.024	57	8.68463	12.857	3	4.28567	2.02643	0.744852	0.0875865	1.01894	1.05756
ZNF638	282.438	57	4.95505	1.96699	2	0.655662	7.55732	0.0528935	0.0876787	2.91788	1.05711
MTA3	206.863	55	3.62917	3.2652	3	1.0884	3.33441	0.0999582	0.0879143	1.73743	1.05594
UGP2	413.287	55	7.25065	7.22389	3	2.40796	3.01111	0.146299	0.088845	1.5903	1.05137
ANKIB1	1127.06	57	19.7729	24.3457	3	8.11524	2.43651	0.10602	0.0889818	1.28482	1.0507
PPA2	173.715	57	3.04763	3.16768	2	1.05589	2.8863	0.470024	0.0890211	1.52922	1.05051
ARMC8	104.619	53	1.83542	1.62272	2	0.540908	3.39322	0.352732	0.0891276	1.76266	1.04999
PRR11	144.455	54	2.53429	0.988682	1	0.329561	7.68992	0.131199	0.089402	2.94297	1.04865
LYRM7	41.555	45	0.729035	0.326655	1	0.108885	6.69545	0.178747	0.0894579	2.74318	1.04838
RNF138	788.41	57	13.8318	13.0538	2	4.35125	3.1788	0.529404	0.0895491	1.66848	1.04794
UBAC2	183.612	56	3.22127	1.12838	1	0.376128	8.5643	0.103109	0.0897728	3.09834	1.04686
TRIOBP	20.2712	30	0.355634	3.03555	2	1.01185	0.35147	0.220762	0.0897773	-1.50853	1.04683
EFL1	60.6222	48	1.06355	0.326655	1	0.108885	9.76762	0.0771836	0.0899049	3.28801	1.04622
AGAP1	329.121	57	5.77406	3.74366	3	1.24789	4.62706	0.132977	0.0899667	2.2101	1.04592
TAF4	83.7872	45	1.46995	0.406021	1	0.13534	10.8611	0.0609729	0.0906441	3.4411	1.04266
EIF3H	283.287	54	4.96994	3.65765	3	1.21922	4.07634	0.059046	0.0906527	2.02727	1.04262
TROVE2	76.3055	49	1.33869	0.583512	1	0.194504	6.88261	0.166627	0.0908227	2.78295	1.04181
NT5C3A	57.2126	48	1.00373	0.579614	1	0.193205	5.19517	0.314616	0.0909588	2.37717	1.04116
UBR1	170.102	57	2.98424	15.1811	3	5.06038	0.589726	0.255936	0.0914804	-0.761883	1.03867
PPHLN1	279.384	57	4.90148	4.02551	3	1.34184	3.65281	0.0837475	0.0916605	1.86901	1.03782
INO80	443.921	57	7.78809	10.7552	3	3.58508	2.17236	0.209915	0.0916669	1.11927	1.03779
FKBP9	28.4257	41	0.498697	3.15579	3	1.05193	0.474078	0.415488	0.0921835	-1.0768	1.03535
TGS1	92.1731	52	1.61707	0.874039	2	0.291346	5.55034	0.0838566	0.0924164	2.47258	1.03425
KIAA0586	60.1828	49	1.05584	0.406021	1	0.13534	7.80136	0.124525	0.0926938	2.96373	1.03295
MTDH	294.131	57	5.16019	5.8722	3	1.9574	2.63624	0.393036	0.0931405	1.39848	1.03086
NF1	1017.24	57	17.8463	21.8598	3	7.28659	2.4492	0.0622976	0.0935573	1.29231	1.02892
PHACTR4	68.6277	53	1.20399	1.03532	2	0.345107	3.48876	0.254595	0.0936152	1.80271	1.02865
NDUFB2	112.904	53	1.98078	1.44134	2	0.480447	4.12279	0.152548	0.0938853	2.04362	1.0274
BTBD10	434.458	57	7.62207	35.0461	3	11.682	0.652461	0.889771	0.0938994	-0.616036	1.02734
LRBA	1077.63	57	18.9058	17.9944	3	5.99812	3.15195	0.202357	0.0940319	1.65624	1.02673
OBSCN	78.8892	51	1.38402	1.1309	2	0.376965	3.67148	0.196648	0.0943254	1.87636	1.02537
NUP155	416.479	57	7.30665	8.87108	3	2.95703	2.47094	0.424783	0.0944429	1.30506	1.02483
B4GALT5	51.8957	44	0.910451	1.97266	3	0.657552	1.38461	0.0420796	0.0944549	0.469477	1.02478
USP6NL	99.0772	54	1.7382	0.653311	1	0.21777	7.98179	0.116868	0.0947824	2.99671	1.02327
LYN	112.564	53	1.97481	0.629299	1	0.209766	9.41435	0.081166	0.0948236	3.23486	1.02308
TRIM8	7.3491	15	0.128931	1.16451	2	0.388171	0.332152	0.368898	0.0950757	-1.59009	1.02193
STX17	63.0219	48	1.10565	0.406021	1	0.13534	8.16938	0.110481	0.0955554	3.03023	1.01974
UBE2J2	195.939	57	3.43753	2.48321	2	0.827737	4.15293	0.208823	0.0960089	2.05413	1.01769
CLMP	18.3442	18	0.321829	3.50293	2	1.16764	0.275622	0.300592	0.0961649	-1.85924	1.01698
ARID4A	117.654	52	2.06411	1.31534	1	0.438446	4.70779	0.38146	0.0966423	2.23505	1.01483
PPP2R3A	80.6068	45	1.41415	9.86542	3	3.28847	0.430033	0.903577	0.0968279	-1.21748	1.014
ZBTB11	198.868	55	3.48891	3.28931	3	1.09644	3.18204	0.142243	0.0969188	1.66995	1.01359
RBM23	1045.07	57	18.3346	24.8788	3	8.29294	2.21088	0.112237	0.0971123	1.14462	1.01273
CTBP2	378.693	57	6.64373	6.13218	3	2.04406	3.25026	0.0944338	0.0973056	1.70056	1.01186
SPG7	98.8205	51	1.73369	0.547384	1	0.182461	9.5017	0.0781834	0.0976709	3.24819	1.01023
CNOT2	229.263	55	4.02216	4.51131	3	1.50377	2.67472	0.233135	0.0978589	1.41939	1.0094
GRIK2	16.634	22	0.291824	2.59699	2	0.865664	0.337111	0.354391	0.0980377	-1.56871	1.00861
KIF21A	58.0944	47	1.0192	0.326655	1	0.108885	9.36033	0.0806006	0.0980785	3.22656	1.00843
KPNA5	752.193	57	13.1964	17.6346	3	5.8782	2.24497	0.190315	0.0983101	1.16669	1.0074
TBC1D5	186.259	54	3.2677	3.53897	2	1.17966	2.77004	0.037342	0.0991028	1.46991	1.00391
TBC1D12	203.546	57	3.57097	3.36445	3	1.12148	3.18416	0.387294	0.0993169	1.67091	1.00298
TANK	143.017	55	2.50907	1.12838	1	0.376128	6.67078	0.169912	0.0993708	2.73786	1.00274
CCT6A	82.4999	51	1.44737	0.710155	1	0.236718	6.1143	0.206862	0.0993935	2.61219	1.00264
DCAF8	68.1739	47	1.19603	0.581	1	0.193667	6.17573	0.201872	0.0996997	2.62661	1.00131
HPRT1	221.61	56	3.8879	4.50239	3	1.5008	2.59056	0.120891	0.0997701	1.37326	1.001
SLFN12	4.46785	6	0.0783833	0.987021	2	0.329007	0.238242	0.50695	0.0999253	-2.0695	1.00032
SNX9	57.4803	45	1.00843	0.629299	1	0.209766	4.80738	0.356652	0.100145	2.26525	0.999373
SUPT16H	166.185	56	2.91552	2.58593	3	0.861978	3.38236	0.217482	0.100444	1.75803	0.998078
TTBK2	306.543	57	5.37795	6.38088	3	2.12696	2.52847	0.282796	0.100879	1.33826	0.996199
IPO7	366.558	56	6.43084	9.19184	3	3.06395	2.09888	0.337138	0.101015	1.06962	0.995613
NFE2L2	12.6703	27	0.222287	1.53302	3	0.511006	0.434998	0.183645	0.10115	-1.20092	0.995036
OTUD4	130.543	52	2.29023	1.56802	2	0.522674	4.38176	0.19905	0.101153	2.13151	0.995023
RAD54B	113.157	52	1.98521	0.906269	2	0.30209	6.5716	0.0552825	0.101172	2.71625	0.99494
NPM1	72.4286	51	1.27068	0.579614	1	0.193205	6.57685	0.17341	0.101383	2.7174	0.994033
MANBA	192.506	56	3.37731	3.92393	2	1.30798	2.58208	0.829002	0.101492	1.36853	0.993568
NDUFAF6	58.5837	48	1.02778	0.710155	1	0.236718	4.34181	0.447053	0.101597	2.1183	0.993121
SYPL1	48.6312	45	0.853179	0.629299	1	0.209766	4.06728	0.519097	0.101632	2.02407	0.992969
UCHL5	64.2159	48	1.1266	0.406021	1	0.13534	8.32416	0.102053	0.101936	3.0573	0.991674
RNPEP	46.3346	50	0.812888	0.494341	1	0.16478	4.93316	0.332671	0.102038	2.30251	0.99124
MRE11A	133.714	56	2.34587	2.13649	2	0.712164	3.294	0.440649	0.102634	1.71984	0.988708
CHEK2	207.476	56	3.63992	2.29364	2	0.764547	4.76088	0.163914	0.102842	2.25123	0.987831
NMD3	43.2357	45	0.758521	0.326655	1	0.108885	6.96625	0.151023	0.102895	2.80038	0.987604
ANKRA2	15.4245	21	0.270605	2.28425	3	0.761418	0.355396	0.898658	0.102984	-1.4925	0.987229
BACH1	1112.57	57	19.5188	93.1251	3	31.0417	0.628792	0.738934	0.103686	-0.669345	0.98428
MAP2K5	86.9159	46	1.52484	0.494341	1	0.16478	9.25378	0.0799297	0.103769	3.21004	0.983933
CNOT10	152.746	57	2.67976	3.27928	3	1.09309	2.45154	0.505235	0.103959	1.29369	0.983137
LDLR	273.651	57	4.80089	3.50252	3	1.16751	4.11209	0.0535309	0.103979	2.03987	0.983053
TAX1BP1	338.855	57	5.94482	4.95731	3	1.65244	3.59761	0.11648	0.104318	1.84704	0.98164
FAM216A	143.441	51	2.51652	1.69012	2	0.563374	4.46687	0.120237	0.104405	2.15926	0.981279
CNOT6L	201.88	57	3.54175	2.96469	3	0.98823	3.58393	0.0519688	0.104645	1.84154	0.980282
NCOA2	456.984	56	8.01726	7.42414	3	2.47471	3.23967	0.225089	0.104789	1.69585	0.979685
CBFA2T2	464.81	55	8.15456	8.69495	3	2.89832	2.81355	0.124359	0.105398	1.49239	0.977169
NUP35	105.186	52	1.84536	1.47431	1	0.491436	3.75505	0.610718	0.105537	1.90883	0.976595
DAP3	276.846	57	4.85695	5.32841	3	1.77614	2.73456	0.256943	0.105711	1.45131	0.975878
TCEANC	79.5984	38	1.39646	1.45365	3	0.484551	2.88198	0.00219913	0.106141	1.52706	0.974118
FLNA	27.851	34	0.488614	3.31353	3	1.10451	0.44238	0.117032	0.106341	-1.17664	0.973299
FBXO9	77.4849	51	1.35938	0.494341	1	0.16478	8.24967	0.101304	0.106676	3.04434	0.971932
TIAL1	47.8587	49	0.839627	0.710155	1	0.236718	3.54695	0.69095	0.106718	1.82658	0.971764
MKLN1	1118.31	57	19.6196	32.0698	3	10.6899	1.83533	0.200109	0.106826	0.876038	0.971322
PISD	25.0457	36	0.439399	2.88383	3	0.961278	0.457099	0.314133	0.106968	-1.12942	0.970748
LRP11	216.926	57	3.80571	21.8905	2	7.29683	0.521557	0.067814	0.107043	-0.939103	0.97044
DENND3	147.556	51	2.5887	14.8049	3	4.93497	0.524563	0.132858	0.10711	-0.930811	0.970168
ANKRD17	541.223	57	9.49515	11.3431	3	3.78102	2.51126	0.195621	0.107151	1.32841	0.970003
FAM193A	219.858	56	3.85715	5.92772	3	1.97591	1.95209	0.769538	0.107155	0.965021	0.969986
UBE2D2	454.896	57	7.98063	9.55817	3	3.18606	2.50486	0.336772	0.107206	1.32473	0.969781
ZNF707	84.4524	50	1.48162	0.547384	1	0.182461	8.12019	0.104585	0.10725	3.02151	0.969604
ATIC	46.2841	46	0.812002	0.547384	1	0.182461	4.45027	0.409881	0.107333	2.15389	0.969266
SAV1	71.639	50	1.25683	7.33024	3	2.44341	0.514373	0.143233	0.107476	-0.959114	0.96869
FANCI	96.4731	53	1.69251	1.20069	2	0.400231	4.22883	0.12908	0.107555	2.08026	0.968369
MCM6	98.766	51	1.73274	0.953405	2	0.317802	5.45226	0.0717192	0.107609	2.44685	0.968153
ZNF341	11.8771	24	0.20837	1.58419	3	0.528065	0.394592	0.561724	0.107733	-1.34157	0.967651
NCAPD2	103.436	51	1.81467	1.12838	1	0.376128	4.82462	0.339332	0.107859	2.27042	0.967143
SCAF11	131.519	54	2.30735	2.26959	3	0.756531	3.04991	0.080242	0.109362	1.60877	0.961134
AC016747.2	160.956	53	2.82379	1.56348	2	0.521159	5.41828	0.0803378	0.109719	2.43784	0.959719
LARP4	864.106	57	15.1598	17.0111	3	5.67037	2.67351	0.153321	0.109758	1.41873	0.959564
NUP98	554.995	57	9.73675	16.2319	3	5.41062	1.79956	0.527071	0.109916	0.847646	0.958941
MTMR1	64.5541	48	1.13253	0.629299	1	0.209766	5.399	0.258946	0.110053	2.43269	0.9584
SNX6	607.663	57	10.6608	15.335	3	5.11166	2.08558	0.035951	0.11063	1.06045	0.956128
LRP5L	258.545	56	4.53588	2.25928	2	0.753093	6.023	0.0879638	0.110728	2.59048	0.955744
LMBR1	973.322	57	17.0758	22.2952	3	7.43174	2.29769	0.645599	0.110914	1.20018	0.955013
SKIV2L2	203.366	57	3.56783	4.16709	3	1.38903	2.56857	0.2784	0.11102	1.36097	0.954598
PTPN2	178.622	56	3.13373	2.58644	2	0.862148	3.63479	0.348998	0.111379	1.86187	0.953197
ACTR6	69.5452	51	1.22009	0.326655	1	0.108885	11.2053	0.0503149	0.111633	3.48611	0.952207
C10orf76	165.74	56	2.90771	3.49248	3	1.16416	2.49769	0.370893	0.111769	1.3206	0.951679
KMT2A	93.795	54	1.64553	1.56348	2	0.521159	3.15744	0.313018	0.111897	1.65875	0.951182
SPG21	149.841	54	2.62879	2.38224	2	0.794079	3.31049	0.446149	0.111952	1.72704	0.950968
HPCAL1	274.076	56	4.80835	2.70132	1	0.900442	5.33999	0.262661	0.112108	2.41684	0.950362
SCAP	273.242	56	4.79372	25.5582	3	8.5194	0.562683	0.656955	0.112112	-0.829607	0.950347
AC116366.7	51.4239	51	0.902173	0.732677	1	0.244226	3.69402	0.613679	0.112285	1.88519	0.949678
SCRN1	35.673	40	0.625842	3.73349	3	1.2445	0.502887	0.806731	0.112904	-0.991694	0.947292
KIAA1109	45.599	45	0.799983	4.36368	3	1.45456	0.549984	0.223954	0.112904	-0.86254	0.947289
PLEKHM1P	83.0284	52	1.45664	1.04172	2	0.347242	4.19489	0.125386	0.113796	2.06863	0.943874
ASH1L	1762.25	57	30.9167	49.3678	3	16.4559	1.87876	0.159846	0.113957	0.90978	0.943259
USP1	187.167	56	3.28364	4.53582	2	1.51194	2.1718	0.87917	0.114242	1.11889	0.942172
USP7	227.154	55	3.98516	4.6362	2	1.5454	2.57872	0.619384	0.11443	1.36666	0.941459
NUP58	53.2458	48	0.934137	5.16995	3	1.72332	0.542057	0.0708322	0.114689	-0.883483	0.940479
ACTR10	57.5799	51	1.01017	0.406021	1	0.13534	7.46395	0.120774	0.115181	2.89994	0.938619
CSGALNACT2	100.712	54	1.76688	8.92249	3	2.97416	0.594077	0.391386	0.115334	-0.751278	0.938041
PRMT5	191.806	53	3.36501	3.00964	3	1.00321	3.35424	0.143018	0.115429	1.74598	0.937684
CNOT11	60.3228	49	1.0583	0.906269	2	0.30209	3.50325	0.240079	0.115696	1.80869	0.93668
COG5	145.19	57	2.54719	1.39555	2	0.465185	5.47565	0.0685514	0.116197	2.45303	0.934804
REL	62.5665	47	1.09766	0.710155	1	0.236718	4.63698	0.355957	0.116297	2.21319	0.934432
PANK3	116.344	56	2.04113	10.0043	3	3.33478	0.612073	0.568299	0.116774	-0.708225	0.932654
LRP5	341.828	56	5.99698	4.49246	3	1.49749	4.0047	0.0715802	0.116912	2.00169	0.932142
MND1	204.576	56	3.58905	3.93489	3	1.31163	2.73633	0.12768	0.117147	1.45224	0.931268
AFF2	54.4949	17	0.956051	0.629299	1	0.209766	4.5577	0.026951	0.117382	2.18831	0.9304
UCHL3	134.874	49	2.36622	14.0035	3	4.66785	0.506918	0.258753	0.117425	-0.980174	0.930241
TTC27	115.586	56	2.02783	2.94862	3	0.982874	2.06317	0.751173	0.117601	1.04486	0.92959
PTPN9	220.156	53	3.86238	3.15728	3	1.05243	3.66998	0.00137658	0.117665	1.87577	0.929354
CHAF1B	139.213	55	2.44233	1.31229	2	0.43743	5.58337	0.0625169	0.117757	2.48114	0.929013
KIF24	146.096	57	2.56309	2.12738	1	0.709127	3.61443	0.628627	0.117798	1.85377	0.928862
SH3D19	60.9729	50	1.0697	0.583512	1	0.194504	5.49963	0.238182	0.117825	2.45933	0.928763
NOL10	249.505	57	4.37728	5.06525	3	1.68842	2.59254	0.0932086	0.117862	1.37436	0.928626
GGCX	37.5438	46	0.658664	0.326655	1	0.108885	6.04916	0.191304	0.118028	2.59674	0.928014
DENND2A	13.514	7	0.237087	4.21692	2	1.40564	0.168669	0.438105	0.118161	-2.56774	0.927525
RASA3	65.3222	38	1.146	8.36338	3	2.78779	0.411079	0.669974	0.118168	-1.28251	0.927499
NDRG3	159.274	55	2.79428	1.48302	1	0.494341	5.65254	0.222954	0.118418	2.4989	0.926584
FKBP8	670.15	57	11.757	56.0303	3	18.6768	0.629499	0.130127	0.119116	-0.667723	0.924031
PARD3	729.232	57	12.7935	10.5071	3	3.50237	3.65283	0.115573	0.119146	1.86901	0.92392
CDCP1	74.245	45	1.30254	0.406021	1	0.13534	9.6242	0.0671943	0.119327	3.26667	0.923261
SLC35F2	142.535	56	2.50061	1.46535	1	0.488451	5.11947	0.277991	0.119852	2.35599	0.921354
VPS37A	246.649	56	4.32718	4.01063	3	1.33688	3.23678	0.144626	0.120129	1.69456	0.920353
TRAPPC10	126.445	56	2.21833	2.97826	3	0.992753	2.23452	0.136502	0.120476	1.15996	0.919098
CH17-472G23.4	12.6803	21	0.222461	1.73116	2	0.577054	0.38551	0.202891	0.121006	-1.37516	0.917194
CBL	120.35	52	2.1114	10.2954	3	3.4318	0.615244	0.905942	0.121136	-0.700768	0.916726
KIAA1549L	32.4228	20	0.568821	5.01633	3	1.67211	0.340181	0.903286	0.12135	-1.55562	0.91596
MTO1	182.445	56	3.20079	3.18462	3	1.06154	3.01524	0.0657833	0.121366	1.59227	0.915902
TBCK	155.61	56	2.72999	3.14112	2	1.04704	2.60734	0.438083	0.121509	1.38258	0.915393
ANKRD36C	167.955	50	2.94657	5.02739	3	1.6758	1.75831	0.033658	0.121751	0.81419	0.914528
NDUFS1	285.003	57	5.00005	23.3486	3	7.78288	0.642442	0.497473	0.121882	-0.638362	0.91406
CFAP44	74.9637	48	1.31515	0.581	1	0.193667	6.79081	0.143948	0.122125	2.76358	0.913195
FUBP1	47.8494	47	0.839464	0.406021	1	0.13534	6.20261	0.176745	0.122216	2.63288	0.912872
STAM	147.875	55	2.5943	3.15115	2	1.05038	2.46986	0.777604	0.122349	1.30443	0.9124
AATF	318.657	57	5.59048	5.30989	3	1.76996	3.15853	0.0590731	0.123006	1.65925	0.910073
PSMD14	168.377	55	2.95398	2.24131	2	0.747102	3.95392	0.166046	0.12319	1.98328	0.909425
RNF34	83.385	51	1.4629	0.955954	2	0.318651	4.5909	0.121639	0.123302	2.19878	0.90903
TNPO3	1438.7	57	25.2403	31.9039	3	10.6346	2.37341	0.0922604	0.123475	1.24696	0.908421
OSBPL2	203.767	51	3.57486	1.48727	3	0.495756	7.21092	0.000194276	0.123645	2.85018	0.907824
HNRNPA2B1	112.959	57	1.98174	2.45419	2	0.818065	2.42248	0.678803	0.123715	1.27648	0.907578
IPO9	191.567	56	3.36082	4.10308	2	1.36769	2.45729	0.942952	0.123723	1.29707	0.907551
POLR3H	13.1614	22	0.230902	1.79632	2	0.598774	0.385625	0.229707	0.123843	-1.37473	0.907127
YME1L1	141.608	56	2.48436	6.29104	3	2.09701	1.18471	0.0346415	0.123952	0.244535	0.906745
CSE1L	508.057	57	8.91329	13.5609	3	4.52029	1.97184	0.656449	0.12411	0.979543	0.906195
EML4	89.5693	50	1.57139	0.820996	1	0.273665	5.74202	0.208507	0.124385	2.52156	0.905233
SLC12A6	19.3618	28	0.33968	2.15319	3	0.717731	0.473269	0.545142	0.124893	-1.07927	0.903461
PPP2R2A	50.4644	44	0.885341	0.406021	1	0.13534	6.54159	0.154414	0.124903	2.70964	0.903427
ANKRD18B	14.3871	20	0.252405	1.98802	2	0.662673	0.380889	0.328065	0.125173	-1.39256	0.90249
RP11-286N22.8	197.957	52	3.47293	2.29392	2	0.764639	4.54192	0.209348	0.12528	2.1833	0.902118
CNIH3	70.6067	25	1.23871	1.03681	2	0.345603	3.58421	0.0154497	0.125723	1.84166	0.900584
AGTPBP1	874.604	57	15.3439	18.9913	3	6.33044	2.42383	0.671676	0.126099	1.27729	0.899287
FBXO11	255.842	57	4.48845	4.16366	2	1.38789	3.23402	0.237494	0.126386	1.69333	0.898299
ZMYND8	331.017	57	5.80732	6.97413	3	2.32471	2.49808	0.137216	0.126416	1.32082	0.898198
SEPT11	80.0041	52	1.40358	7.44754	3	2.48251	0.565387	0.313781	0.126807	-0.82269	0.896857
BUB1	125.017	51	2.19328	2.53289	3	0.844297	2.59776	0.065606	0.126834	1.37727	0.896763
RB1CC1	60.4443	46	1.06043	0.906269	2	0.30209	3.51031	0.225388	0.126893	1.8116	0.896563
EFCAB2	107.396	51	1.88414	1.12364	2	0.374547	5.03046	0.0767199	0.127134	2.33069	0.895739
ARIH1	279.266	56	4.8994	4.80745	3	1.60248	3.05738	0.121843	0.128141	1.6123	0.892312
PLCD3	30.2839	28	0.531297	4.00453	2	1.33484	0.398022	0.116984	0.12816	-1.32908	0.892247
POLA1	166.627	55	2.92327	2.93071	1	0.976902	2.99239	0.918929	0.128601	1.5813	0.890756
ICE2	60.3247	45	1.05833	0.326655	1	0.108885	9.71968	0.0625086	0.128799	3.28091	0.890088
USP10	286.32	57	5.02316	5.85377	2	1.95126	2.57432	0.751113	0.128874	1.36419	0.889836
BAZ1B	490.435	57	8.60413	10.2265	3	3.40884	2.52406	0.23128	0.128916	1.33575	0.889692
CNDP2	6.88669	17	0.120819	0.955954	2	0.318651	0.379158	0.2425	0.129096	-1.39913	0.889087
SASH1	30.6027	28	0.536889	4.13395	2	1.37798	0.38962	0.362943	0.129296	-1.35986	0.888415
TCERG1	42.2897	45	0.741925	0.326655	1	0.108885	6.81383	0.137494	0.129464	2.76847	0.887852
POLD1	373.482	56	6.55232	6.66814	3	2.22271	2.94789	0.122696	0.129515	1.55968	0.88768
ZNF451	132.414	56	2.32305	3.10409	2	1.0347	2.24515	0.66179	0.129798	1.16681	0.886732
VANGL1	78.7882	46	1.38225	0.547384	1	0.182461	7.57557	0.107587	0.130713	2.92136	0.883681
SEMA4B	269.532	54	4.72863	4.75711	3	1.5857	2.98203	0.154504	0.131302	1.5763	0.881729
STAT3	135.557	55	2.37818	2.42205	2	0.80735	2.94567	0.29513	0.131581	1.55859	0.880806
OXR1	233.126	56	4.08993	2.80917	2	0.936392	4.36775	0.110681	0.131684	2.12689	0.880467
YLPM1	47.1391	51	0.827001	0.583512	1	0.194504	4.25185	0.403853	0.131739	2.08809	0.880287
LUC7L3	75.3656	52	1.3222	1.2045	2	0.401499	3.29317	0.233193	0.131912	1.71948	0.879717
NCKAP1	341.83	57	5.99702	8.70691	3	2.9023	2.06629	0.18973	0.132207	1.04705	0.878746
RNF169	276.158	56	4.84488	6.44228	3	2.14743	2.25613	0.438217	0.132337	1.17385	0.87832
SPARC	6.69857	8	0.117519	6.07937	3	2.02646	0.0579922	1.64746e-05	0.132409	-4.108	0.878081
KIF1B	130.489	56	2.28929	3.23278	3	1.07759	2.12444	0.478764	0.132536	1.08708	0.877666
FAM126B	91.3773	53	1.60311	1.69579	2	0.565263	2.83604	0.54737	0.132786	1.50388	0.876849
VPS35	106.435	52	1.86728	1.87328	1	0.624427	2.99038	0.905313	0.132817	1.58033	0.876746
BNIP2	44.9407	49	0.788433	0.579614	1	0.193205	4.08082	0.441842	0.13307	2.02886	0.87592
TPR	68.0399	52	1.19368	0.985635	2	0.328545	3.63324	0.177641	0.133282	1.86126	0.875228
PAIP2	274.241	56	4.81125	5.76851	3	1.92284	2.50216	0.373837	0.133917	1.32317	0.873163
PSMA4	82.6383	52	1.4498	1.402	2	0.467332	3.10228	0.269764	0.133927	1.63333	0.87313
TPM1	56.8225	15	0.996885	1.127	2	0.375666	2.65365	0.0289356	0.134791	1.40798	0.870338
SPIDR	1192.69	57	20.9245	18.7589	3	6.25296	3.34633	0.0914366	0.134941	1.74258	0.869857
RP1-27O5.3	60.9374	48	1.06908	0.583512	1	0.194504	5.49643	0.218262	0.135302	2.45849	0.868695
RAB7A	226.674	55	3.97673	4.00971	3	1.33657	2.97532	0.167676	0.135607	1.57305	0.867717
TSNARE1	98.6235	46	1.73024	0.629299	1	0.209766	8.2484	0.0862941	0.13663	3.04411	0.864455
CTBP1	426.276	56	7.47852	8.54142	3	2.84714	2.62668	0.0780393	0.136804	1.39324	0.8639
EML5	121.608	42	2.13347	15.5261	2	5.17535	0.412237	0.149333	0.137294	-1.27846	0.862347
GABPB1	263.397	57	4.62101	6.2744	3	2.09147	2.20946	0.384281	0.137724	1.14369	0.86099
NCBP1	43.8012	42	0.768442	0.406021	1	0.13534	5.67784	0.200034	0.137786	2.50534	0.860795
HERC4	952.647	57	16.7131	80.8097	3	26.9366	0.620462	0.327841	0.138394	-0.688585	0.858883
PIP4K2A	57.881	46	1.01546	0.579614	1	0.193205	5.25586	0.238384	0.138465	2.39393	0.858661
TTLL5	190.54	55	3.3428	4.00415	2	1.33472	2.50451	0.645577	0.138485	1.32453	0.858596
NRIP1	908.316	55	15.9354	13.66	3	4.55335	3.49971	0.193272	0.138524	1.80723	0.858474
FNIP1	150.381	54	2.63826	13.8563	3	4.61876	0.571205	0.637086	0.138752	-0.807919	0.857761
FARS2	184.997	53	3.24556	2.48562	2	0.828538	3.91721	0.129991	0.139289	1.96983	0.856083
USP42	164.774	56	2.89077	1.87328	1	0.624427	4.62948	0.318072	0.14007	2.21085	0.853654
DHX36	46.5929	47	0.817419	0.494341	1	0.16478	4.96066	0.270574	0.1401	2.31053	0.853562
GMPS	587.362	57	10.3046	16.0964	3	5.36547	1.92054	0.257833	0.140215	0.94151	0.853207
USP25	1498.18	56	26.2838	30.4428	3	10.1476	2.59015	0.0929139	0.140232	1.37304	0.853154
ARHGAP5	2337.65	57	41.0114	45.4501	3	15.15	2.70702	0.123876	0.140301	1.4367	0.852941
ADARB1	200.801	54	3.52283	24.6128	3	8.20425	0.429391	0.870185	0.141267	-1.21964	0.849958
PDXDC1	321.417	55	5.6389	4.4272	3	1.47573	3.82109	0.129106	0.141487	1.93398	0.849284
ANKRD11	442.99	57	7.77176	6.79557	3	2.26519	3.43095	0.0742347	0.141708	1.77861	0.848604
EPB41	112.971	55	1.98195	2.06402	2	0.688008	2.88071	0.444486	0.142141	1.52643	0.847281
FAT1	2198.72	57	38.574	209.505	3	69.835	0.552359	0.0909176	0.14237	-0.856321	0.846581
MCM3AP	66.4811	51	1.16634	1.22702	1	0.409006	2.85163	0.968824	0.142668	1.51179	0.845674
GFM1	53.1476	48	0.932414	0.710155	1	0.236718	3.93892	0.459263	0.142817	1.9778	0.845221
LETMD1	96.4745	53	1.69254	0.710155	1	0.236718	7.15	0.114986	0.143316	2.83794	0.843707
CALD1	13.1494	22	0.230692	2.00131	2	0.667103	0.345811	0.252489	0.143466	-1.53194	0.84325
DCP1A	43.2953	47	0.759566	0.547384	1	0.182461	4.16289	0.401805	0.143539	2.05759	0.843029
NDUFS4	62.742	50	1.10074	0.406021	1	0.13534	8.1331	0.0859489	0.143664	3.0238	0.842651
SNX2	46.7859	45	0.820805	0.653311	1	0.21777	3.76913	0.507504	0.143706	1.91423	0.842527
USP32	233.441	57	4.09546	7.60594	3	2.53531	1.61537	0.314833	0.143714	0.691861	0.8425
YIPF6	57.5923	46	1.01039	0.494341	1	0.16478	6.13174	0.162624	0.143944	2.6163	0.841806
TEX9	129.218	56	2.26698	2.33424	2	0.77808	2.91356	0.399554	0.144205	1.54278	0.84102
LRPPRC	612.522	57	10.746	10.749	3	3.58301	2.99916	0.0576159	0.144286	1.58456	0.840776
DGKD	419.114	57	7.35288	10.1352	3	3.37839	2.17645	0.0919038	0.144582	1.12197	0.839886
RSL1D1	315.55	56	5.53597	6.92551	3	2.3085	2.39808	0.226488	0.145607	1.26188	0.836819
MITD1	518.636	57	9.09888	11.8917	3	3.9639	2.29544	0.519567	0.145802	1.19877	0.836238
ZC3H12C	217.966	55	3.82397	4.33514	3	1.44505	2.64626	0.204495	0.146005	1.40395	0.835632
WBSCR22	166.89	55	2.92789	3.19085	3	1.06362	2.75276	0.201524	0.146529	1.46088	0.834077
GSPT1	199.766	57	3.50467	4.71564	3	1.57188	2.2296	0.653674	0.146718	1.15679	0.833518
ZDHHC4	61.7396	48	1.08315	0.874039	2	0.291346	3.71774	0.1699	0.146791	1.89443	0.833301
FAF1	487.419	56	8.55121	9.38161	3	3.1272	2.73446	0.408917	0.146818	1.45126	0.833221
CDK17	237.492	56	4.16652	3.59202	2	1.19734	3.47981	0.171066	0.146998	1.79901	0.832688
CEP55	29.4164	43	0.516076	0.326655	1	0.108885	4.73964	0.291147	0.147164	2.24478	0.832198
ARID4B	144.272	56	2.53108	2.92419	3	0.974731	2.5967	0.189495	0.147221	1.37668	0.83203
NQO1	124.092	50	2.17705	0.710155	1	0.236718	9.19678	0.0642289	0.147363	3.20113	0.831611
PVT1	2359.73	57	41.3987	38.4998	3	12.8333	3.22589	0.00184282	0.1474	1.6897	0.831501
SHTN1	90.2691	51	1.58367	1.31229	2	0.43743	3.62039	0.159527	0.1475	1.85615	0.831209
EXOC7	27.7851	39	0.487458	2.79446	3	0.931485	0.523313	0.886036	0.14776	-0.934255	0.830443
MPP5	463.859	56	8.13787	6.24155	3	2.08052	3.91146	0.123272	0.148033	1.96771	0.829642
PAPOLA	216.344	56	3.79551	4.10257	3	1.36752	2.77546	0.111394	0.148045	1.47273	0.829608
CPEB3	91.4804	47	1.60492	0.812043	1	0.270681	5.92919	0.172073	0.148223	2.56784	0.829085
FARSA	523.174	57	9.1785	14.4138	3	4.80459	1.91036	0.211492	0.148428	0.933845	0.828485
TULP4	75.1386	47	1.31822	0.583512	1	0.194504	6.77735	0.126379	0.148789	2.76072	0.827431
NAP1L4	75.2824	49	1.32074	0.906269	2	0.30209	4.37203	0.114538	0.149186	2.1283	0.826272
EXT1	25.2637	34	0.443223	2.79551	3	0.931838	0.475644	0.3257	0.149678	-1.07204	0.824843
URB1	94.3095	52	1.65455	1.44775	2	0.482582	3.42854	0.205462	0.149719	1.7776	0.824723
TNRC18	86.7383	52	1.52172	1.29115	2	0.430385	3.53573	0.166338	0.14983	1.82201	0.824401
ARHGEF10L	63.6529	47	1.11672	0.547384	1	0.182461	6.1203	0.158382	0.150296	2.6136	0.823052
SMYD3	449.469	57	7.88542	6.45093	2	2.15031	3.66711	0.154704	0.150346	1.87464	0.822907
RBBP8	344.418	57	6.04243	6.35386	3	2.11795	2.85296	0.408618	0.150654	1.51246	0.822018
NMT1	67.9161	54	1.19151	1.68863	2	0.562877	2.11682	0.811908	0.15074	1.0819	0.821772
GBAS	165.834	55	2.90938	3.12746	3	1.04249	2.7908	0.267788	0.151324	1.48068	0.820093
WDR41	221.768	54	3.89067	3.77814	2	1.25938	3.08936	0.236016	0.151486	1.62731	0.819627
DNTTIP2	189.415	52	3.32306	4.91803	3	1.63934	2.02707	0.0427938	0.151523	1.0194	0.819521
RNF213	331.357	57	5.81328	5.74304	2	1.91435	3.03669	0.334837	0.151734	1.6025	0.818917
SERAC1	12.3782	20	0.217162	1.74023	2	0.580076	0.374368	0.304474	0.152049	-1.41747	0.818017
MRPL3	60.8702	52	1.0679	1.07785	2	0.359284	2.9723	0.262453	0.152202	1.57158	0.817581
RHOT1	162.045	54	2.8429	3.25991	2	1.08664	2.61624	0.387242	0.152704	1.38749	0.816149
FNIP2	31.7931	36	0.557774	3.48736	3	1.16245	0.479825	0.8962	0.152879	-1.05942	0.815651
ATG5	41.4054	46	0.72641	4.31459	3	1.4382	0.505084	0.73548	0.152999	-0.985404	0.81531
RNF170	41.7646	44	0.732713	3.98204	2	1.32735	0.552014	0.0554275	0.15319	-0.857224	0.814771
HADHB	133.069	55	2.33454	1.74664	1	0.582212	4.00978	0.420075	0.153393	2.00352	0.814194
COPB1	65.6157	52	1.15115	6.35134	3	2.11711	0.543737	0.650709	0.153601	-0.87902	0.813605
AC005324.8	28.5891	37	0.501562	3.19693	3	1.06564	0.470666	0.893236	0.153611	-1.08722	0.813579
PKM	68.2524	52	1.19741	0.900362	1	0.300121	3.98976	0.424628	0.153642	1.9963	0.813491
AGO2	192.449	56	3.37629	3.8574	3	1.2858	2.62584	0.135612	0.153672	1.39278	0.813405
KCMF1	143.553	54	2.51848	2.69363	3	0.897877	2.80493	0.0956478	0.153719	1.48796	0.813274
SARNP	91.6934	53	1.60866	1.64033	2	0.546777	2.94207	0.324535	0.153897	1.55683	0.812771
MBD2	56.6492	45	0.993846	0.581	1	0.193667	5.13174	0.234107	0.153995	2.35945	0.812492
RP11-798G7.3	44.63	48	0.782982	0.583512	1	0.194504	4.02554	0.414905	0.154092	2.00918	0.812221
BVES	10.7886	20	0.189273	3.35942	3	1.11981	0.169023	0.0305392	0.154184	-2.56471	0.811961
CDK12	116.667	50	2.0468	0.653311	1	0.21777	9.39888	0.0591731	0.154288	3.23249	0.811669
XPO1	4604.81	57	80.7862	152.65	3	50.8834	1.58767	0.190677	0.1543	0.666916	0.811635
PSD3	2087.93	57	36.6304	38.4581	3	12.8194	2.85742	0.0582317	0.154459	1.51471	0.811186
TMEM116	165.307	53	2.90012	1.31534	1	0.438446	6.61454	0.12991	0.154562	2.72564	0.810897
PRKCE	84.3412	50	1.47967	0.583512	1	0.194504	7.6074	0.0946279	0.154592	2.9274	0.810814
ATAD2B	563.206	56	9.88081	12.6522	3	4.21742	2.34286	0.13837	0.1546	1.22827	0.81079
TOLLIP	87.931	52	1.54265	0.547384	1	0.182461	8.45467	0.0747037	0.154612	3.07975	0.810756
TAF12	44.4425	48	0.779694	0.494341	1	0.16478	4.73172	0.282011	0.154916	2.24236	0.809903
GBF1	115.704	54	2.02989	2.529	3	0.843	2.40793	0.079747	0.154941	1.2678	0.809833
PDPK1	70.78	52	1.24175	1.07534	2	0.358447	3.46426	0.169636	0.155151	1.79255	0.809246
GPATCH1	110.923	54	1.94602	1.7563	2	0.585432	3.32408	0.246823	0.155175	1.73295	0.809179
SNHG12	123.217	53	2.1617	1.87137	1	0.623791	3.46542	0.588728	0.155376	1.79303	0.808616
NEK9	211.063	56	3.70285	3.04169	2	1.0139	3.6521	0.296732	0.155987	1.86873	0.806911
G3BP2	79.2377	51	1.39014	1.09477	1	0.364922	3.8094	0.468524	0.156287	1.92956	0.806078
FAM208A	629.697	57	11.0473	16.3718	3	5.45726	2.02433	0.0707214	0.15645	1.01745	0.805624
ATF7IP	232.282	55	4.07512	4.93679	3	1.6456	2.47638	0.0538358	0.156598	1.30823	0.805212
SNRK	46.9941	42	0.824457	4.70913	3	1.56971	0.525229	0.721008	0.156717	-0.928983	0.804884
KIFC1	13.5048	23	0.236926	1.66462	2	0.554873	0.426991	0.0994464	0.156768	-1.22772	0.804742
ARMC9	58.9831	46	1.03479	5.86692	3	1.95564	0.529132	0.496541	0.157147	-0.918301	0.803693
EIF5B	36.7925	44	0.645482	0.406021	1	0.13534	4.76932	0.273851	0.157261	2.25379	0.803378
PPP4R3B	94.8609	54	1.66423	1.56097	2	0.520322	3.19846	0.242369	0.157584	1.67738	0.802487
ODZ4	2.06737	4	0.0362697	0.581	1	0.193667	0.187279	0.0706129	0.15774	-2.41674	0.802058
OPTN	11.1146	24	0.194994	1.35943	2	0.453142	0.430314	0.316897	0.158078	-1.21654	0.801128
UCK2	149.367	52	2.62047	2.22133	2	0.740444	3.53906	0.155862	0.158316	1.82336	0.800475
ADRBK2	82.4616	48	1.44669	1.07395	2	0.357985	4.04122	0.111185	0.158439	2.01479	0.800138
SNX29	52.6593	48	0.923847	0.581	1	0.193667	4.77029	0.272227	0.158462	2.25408	0.800075
CLTC	75.7044	54	1.32815	1.5344	2	0.511468	2.59673	0.577365	0.158514	1.3767	0.799933
C6orf136	200.582	55	3.51898	3.55702	3	1.18567	2.96792	0.0924422	0.158768	1.56945	0.799238
ZNF280D	43.8185	47	0.768746	0.579614	1	0.193205	3.97892	0.416802	0.159374	1.99238	0.797581
VLDLR	1.28679	2	0.0225753	0.406021	1	0.13534	0.166804	0.0867344	0.15981	-2.58378	0.796397
RAPGEF1	85.5985	46	1.50173	0.988682	1	0.329561	4.55676	0.301463	0.159812	2.18801	0.796391
TRPC4AP	65.2585	47	1.14489	0.955954	2	0.318651	3.59291	0.190001	0.159873	1.84515	0.796225
MCU	374.124	56	6.56357	4.42835	2	1.47612	4.44651	0.216344	0.159878	2.15267	0.79621
TANC1	410.673	57	7.20479	9.38755	3	3.12918	2.30245	0.463645	0.159898	1.20317	0.796156
ZNF277	70.4506	48	1.23598	0.581	1	0.193667	6.38197	0.137387	0.160015	2.674	0.795839
ARHGEF9	76.7282	53	1.34611	1.48136	2	0.493787	2.72609	0.35779	0.160462	1.44683	0.794629
UQCRC2	174.502	54	3.06144	1.74802	2	0.582674	5.25412	0.0744921	0.160545	2.39345	0.794404
WWP1	140.542	55	2.46564	1.87328	1	0.624427	3.94865	0.422131	0.16064	1.98136	0.794147
GKAP1	57.6934	43	1.01217	0.494341	1	0.16478	6.14251	0.149501	0.160719	2.61883	0.793933
GPD2	76.4771	49	1.3417	0.583512	1	0.194504	6.89808	0.114633	0.160779	2.78619	0.793772
AKT2	88.1654	51	1.54676	1.53607	2	0.512022	3.02089	0.290744	0.16078	1.59497	0.793767
C1orf27	91.6074	45	1.60715	0.629299	1	0.209766	7.66161	0.090303	0.161031	2.93765	0.793092
ACOT9	52.3924	47	0.919164	0.732677	1	0.244226	3.76359	0.47227	0.161157	1.91211	0.79275
POLR1A	62.0575	48	1.08873	0.820996	1	0.273665	3.97832	0.413241	0.161435	1.99216	0.792002
RFC2	54.7398	51	0.960347	1.03532	2	0.345107	2.78275	0.335899	0.161448	1.47651	0.791966
MRPS35	659.13	55	11.5637	12.5204	3	4.17347	2.77077	0.0770448	0.161576	1.47028	0.791623
PHF3	104.694	55	1.83673	2.35791	3	0.785971	2.3369	0.172411	0.162014	1.22459	0.790447
METTL6	35.6448	39	0.625347	3.99086	3	1.33029	0.470084	0.967745	0.162099	-1.08901	0.790219
WDR27	158.309	56	2.77734	3.62706	2	1.20902	2.29718	0.525869	0.16226	1.19987	0.789788
TKT	64.5681	47	1.13277	0.910167	2	0.303389	3.73373	0.162052	0.162337	1.90062	0.789583
MOB1B	20.373	32	0.35742	2.19881	3	0.732937	0.487655	0.852963	0.162828	-1.03607	0.78827
FAM196A	1.69945	2	0.0298149	0.583512	1	0.194504	0.153287	0.101	0.162876	-2.70569	0.788143
XRCC5	136.117	53	2.38802	3.05826	3	1.01942	2.34253	0.309817	0.162894	1.22807	0.788094
PRRC2C	221.752	57	3.89039	6.21958	3	2.07319	1.87652	0.660541	0.162955	0.908061	0.787932
MGAT4B	11.6877	20	0.205047	1.61493	3	0.538311	0.380908	0.160834	0.162959	-1.39249	0.787921
CARNMT1	183.721	55	3.22318	3.58483	2	1.19494	2.69734	0.392424	0.163054	1.43154	0.787667
ABCF1	30.9822	38	0.543547	3.29576	3	1.09859	0.494769	0.582622	0.163252	-1.01517	0.787141
BUB1B	118.181	54	2.07335	2.21995	3	0.739982	2.80189	0.0573045	0.163318	1.4864	0.786966
LONP2	302.893	57	5.31392	6.8674	3	2.28913	2.32137	0.149234	0.163323	1.21497	0.786953
KDM3B	123.498	54	2.16663	2.93501	3	0.978338	2.2146	0.112769	0.164087	1.14705	0.784926
ETNK1	184.803	55	3.24215	3.61604	2	1.20535	2.68981	0.435069	0.16424	1.42751	0.784521
GARNL3	70.7037	48	1.24042	0.732677	1	0.244226	5.07898	0.228761	0.164287	2.34454	0.784397
NOP58	209.554	57	3.67638	5.3122	3	1.77073	2.07619	0.771183	0.164317	1.05394	0.784318
SPAG1	123.254	53	2.16236	0.979966	1	0.326655	6.6197	0.123355	0.165154	2.72676	0.78211
MAP3K14	54.8101	41	0.961581	0.547384	1	0.182461	5.27006	0.0128037	0.165274	2.39782	0.781795
USP15	39.2455	40	0.688518	0.326655	1	0.108885	6.32334	0.136847	0.165386	2.66069	0.781502
UPF2	531.01	57	9.31596	13.7823	3	4.59409	2.02781	0.152217	0.165411	1.01992	0.781436
C2CD5	150.304	57	2.63692	2.93501	3	0.978338	2.6953	0.0582622	0.165567	1.43045	0.781027
FAM172A	131.771	52	2.31177	3.59793	3	1.19931	1.92759	0.0259854	0.165895	0.946796	0.780168
RAB3IP	757.819	57	13.2951	13.2792	3	4.42639	3.00359	0.469522	0.166218	1.58669	0.779323
ZNF778	66.8208	49	1.17229	0.874039	2	0.291346	4.02371	0.126073	0.166376	2.00853	0.778909
PAPD4	219.403	56	3.84917	5.25229	3	1.75076	2.19857	0.334519	0.166463	1.13656	0.778681
SNX4	47.9193	46	0.84069	1.99021	3	0.663405	1.26724	0.0291571	0.166723	0.341684	0.778003
IQGAP1	494.544	57	8.67621	13.7074	3	4.56914	1.89887	0.335349	0.166863	0.925144	0.77764
USP34	675.687	57	11.8542	17.016	3	5.672	2.08994	0.074449	0.167449	1.06346	0.776118
H2AFV	83.173	48	1.45917	1.35943	2	0.453142	3.22013	0.212641	0.167475	1.68712	0.77605
HIRA	36.1122	46	0.633547	0.326655	1	0.108885	5.81849	0.163955	0.167801	2.54064	0.775204
SERPINB6	6.70813	15	0.117686	0.953405	2	0.317802	0.370314	0.51215	0.168272	-1.43318	0.773988
MEF2A	45.3877	44	0.796275	0.406021	1	0.13534	5.8835	0.159286	0.16849	2.55667	0.773425
AKAP13	338.974	57	5.94692	7.43869	3	2.47956	2.39837	0.381595	0.168557	1.26206	0.773254
CTC-435M10.3	6.52434	14	0.114462	0.906269	2	0.30209	0.378901	0.393741	0.168651	-1.40011	0.773011
POLQ	166.874	57	2.92762	3.72629	3	1.2421	2.35699	0.240698	0.168774	1.23695	0.772695
SMG6	50.9742	46	0.894285	0.583512	1	0.194504	4.59777	0.283473	0.168843	2.20094	0.772517
OFD1	44.8995	44	0.787711	0.406021	1	0.13534	5.82022	0.162926	0.169025	2.54107	0.77205
CENPK	105.002	52	1.84215	2.26973	2	0.756578	2.43484	0.448356	0.169087	1.28383	0.77189
CELF1	119.496	56	2.09642	2.21349	3	0.737831	2.84132	0.124862	0.169421	1.50656	0.771032
TOP2B	29.5553	38	0.518515	0.326655	1	0.108885	4.76204	0.259777	0.169776	2.25158	0.770123
SNX16	2.30688	6	0.0404715	0.494341	1	0.16478	0.245609	0.0503718	0.169884	-2.02557	0.769847
IBTK	384.409	56	6.74401	10.0642	3	3.35472	2.0103	0.60144	0.169969	1.00741	0.769631
NT5C2	43.6961	45	0.766599	1.7855	3	0.595165	1.28804	0.0384119	0.170043	0.365182	0.769441
STYX	39.0812	44	0.685634	0.326655	1	0.108885	6.29686	0.135203	0.170085	2.65463	0.769335
GLB1	109.182	51	1.91547	1.75054	1	0.583512	3.28266	0.630475	0.170247	1.71487	0.76892
ACSL4	24.1728	33	0.424084	2.77123	3	0.923742	0.459093	0.412708	0.170366	-1.12314	0.768616
RMND5A	117.563	50	2.0625	1.09477	1	0.364922	5.6519	0.173189	0.170565	2.49873	0.768109
PTPN12	645.981	57	11.333	12.8895	3	4.2965	2.63773	0.0998444	0.170667	1.3993	0.767852
COPS4	30.7327	42	0.53917	3.03528	2	1.01176	0.532904	0.12925	0.170749	-0.908054	0.767642
VTI1A	68.0388	46	1.19366	0.547384	1	0.182461	6.54201	0.123466	0.170782	2.70973	0.767557
SRP68	52.5773	51	0.922409	0.953405	2	0.317802	2.90247	0.268717	0.170813	1.53728	0.767478
TGIF2-C20orf24	99.2308	52	1.74089	0.820996	1	0.273665	6.36138	0.131562	0.170929	2.66934	0.767184
EFTUD2	25.3849	38	0.445349	0.326655	1	0.108885	4.09008	0.37117	0.170983	2.03213	0.767047
RRP1B	55.5696	50	0.974905	1.162	1	0.387333	2.51697	0.845034	0.171056	1.33169	0.766861
RHPN2	101.531	48	1.78124	0.629299	1	0.209766	8.49155	0.0683979	0.171122	3.08603	0.766695
IPO11	272.04	57	4.77263	6.52105	3	2.17368	2.19564	0.165239	0.171422	1.13464	0.765934
CMPK1	102.861	51	1.80457	1.78411	2	0.594703	3.03441	0.343696	0.171422	1.60142	0.765932
TARBP1	104.435	54	1.83219	1.69969	2	0.566563	3.23387	0.325995	0.171618	1.69326	0.765438
CTB-131B5.5	13.9046	22	0.24394	1.92297	2	0.640988	0.380568	0.338557	0.171855	-1.39377	0.764838
HUWE1	740.695	57	12.9947	18.0888	3	6.02961	2.15514	0.298027	0.171873	1.10778	0.764792
NFAT5	451.353	57	7.91847	7.86449	3	2.6215	3.02059	0.102736	0.17199	1.59483	0.764497
KIF16B	169.917	56	2.981	3.71279	2	1.2376	2.4087	0.763867	0.172129	1.26825	0.764146
NCAPH	69.5219	50	1.21968	0.953405	2	0.317802	3.83788	0.124365	0.172616	1.94031	0.762919
SDF4	575.203	53	10.0913	13.2452	2	4.41505	2.28565	0.612833	0.172802	1.19261	0.762451
PGAP1	88.4062	52	1.55099	1.63895	2	0.546315	2.83899	0.329671	0.173241	1.50538	0.761349
PTP4A2	657.715	57	11.5389	54.3402	3	18.1134	0.637034	0.623437	0.17336	-0.650558	0.761052
AC136007.2	73.9468	47	1.29731	0.406021	1	0.13534	9.58555	0.0516783	0.173619	3.26086	0.760403
PPFIA1	519.919	57	9.12138	9.39735	3	3.13245	2.9119	0.131033	0.173685	1.54196	0.760238
ATAD1	89.311	51	1.56686	1.09477	1	0.364922	4.29368	0.326022	0.174115	2.10221	0.759165
ZFR	277.963	57	4.87654	8.59989	3	2.86663	1.70114	0.455916	0.174647	0.766504	0.757838
FANCA	165.642	57	2.90599	4.16119	3	1.38706	2.09507	0.800943	0.174728	1.067	0.757636
HIBADH	982.676	57	17.2399	22.2045	3	7.4015	2.32925	0.535433	0.175223	1.21986	0.756408
GART	68.9258	52	1.20922	1.5344	2	0.511468	2.36422	0.699058	0.175887	1.24137	0.754765
CHD8	122.173	56	2.14339	2.67172	3	0.890572	2.40676	0.244557	0.175962	1.26709	0.75458
ZC3HAV1	85.0799	49	1.49263	1.16061	2	0.386871	3.85821	0.113446	0.176118	1.94793	0.754196
SIN3B	25.8663	40	0.453795	0.326655	1	0.108885	4.16765	0.347061	0.176151	2.05923	0.754114
TAF15	69.5197	52	1.21964	1.1387	1	0.379566	3.21326	0.648003	0.176282	1.68404	0.753792
TMEM38A	52.5139	41	0.921296	0.326655	1	0.108885	8.46118	0.0671426	0.176832	3.08086	0.752438
SKAP2	128.005	53	2.2457	1.78853	2	0.596175	3.76684	0.150923	0.176917	1.91335	0.75223
EDRF1	34.5392	41	0.605952	0.406021	1	0.13534	4.47724	0.290882	0.177369	2.16261	0.751123
FMN2	7.0758	4	0.124137	10.7386	3	3.57954	0.0346795	8.92919e-07	0.177542	-4.84977	0.750699
COPA	172.794	56	3.03147	14.2143	3	4.73811	0.639806	0.316016	0.177553	-0.644293	0.750673
ZCCHC17	178.038	55	3.12347	4.35053	2	1.45018	2.15386	0.602142	0.177629	1.10692	0.750486
DIAPH2	47.8868	43	0.840119	0.494341	1	0.16478	5.09842	0.213317	0.177862	2.35005	0.749916
TOMM70	39.4399	47	0.691928	0.629299	1	0.209766	3.29857	0.604767	0.177904	1.72184	0.749814
TMED2	413.405	57	7.25272	11.4824	3	3.82746	1.89492	0.979827	0.178251	0.922134	0.748967
CCDC90B	57.8505	49	1.01492	0.874039	2	0.291346	3.48355	0.174423	0.178308	1.80056	0.748828
EIF3I	49.6697	48	0.871399	0.629299	1	0.209766	4.15414	0.345816	0.178816	2.05455	0.747594
ETV6	66.6015	46	1.16845	0.581	1	0.193667	6.03329	0.143216	0.179088	2.59295	0.746934
GIGYF2	395.342	57	6.93582	11.2543	3	3.75144	1.84884	0.178689	0.17912	0.886624	0.746855
ACTR3B	46.3001	44	0.812283	0.494341	1	0.16478	4.92949	0.229433	0.179374	2.30144	0.746241
C5orf42	371.679	57	6.52069	9.13041	3	3.04347	2.14252	0.111057	0.179439	1.09931	0.746082
NUP214	52.1269	51	0.914507	0.900362	1	0.300121	3.04713	0.725873	0.179709	1.60745	0.745431
RGL3	80.8592	45	1.41858	0.581	1	0.193667	7.32487	0.0915643	0.179853	2.8728	0.745082
RP11-1280N14.4	1.63317	5	0.0286521	0.326655	1	0.108885	0.26314	0.0503729	0.179864	-1.9261	0.745056
ESCO1	95.1189	52	1.66875	1.97822	2	0.659405	2.53069	0.520788	0.18033	1.33953	0.743931
JAK2	25.4748	37	0.446926	2.47035	2	0.82345	0.542749	0.192347	0.180661	-0.881643	0.743136
GTF3C5	59.3975	41	1.04206	0.579614	1	0.193205	5.39356	0.184593	0.180666	2.43124	0.743124
MAPK8IP3	48.5016	49	0.850906	0.732677	1	0.244226	3.4841	0.524308	0.180687	1.80079	0.743073
TADA2A	302.126	57	5.30046	7.13338	3	2.37779	2.22915	0.35267	0.180819	1.15649	0.742756
E2F1	39.1197	42	0.686311	0.583512	1	0.194504	3.52852	0.507886	0.180995	1.81906	0.742334
CAPRIN1	653.062	57	11.4572	18.0989	3	6.03296	1.8991	0.0853722	0.181007	0.925319	0.742304
VWCE	2.71574	6	0.0476445	0.547384	1	0.182461	0.261121	0.0525579	0.18102	-1.93721	0.742274
ARGLU1	50.4999	38	0.885963	1.98551	3	0.661836	1.33864	0.0326306	0.181124	0.420772	0.742025
STT3B	594.842	57	10.4358	16.1167	3	5.37224	1.94255	0.0872377	0.181454	0.95795	0.741233
IFT74	55.6458	44	0.976242	0.579614	1	0.193205	5.05289	0.214416	0.181485	2.33711	0.74116
GUSB	114.269	54	2.00472	2.15299	2	0.717662	2.7934	0.344911	0.181555	1.48202	0.740993
UBA2	1340.29	57	23.5138	40.9139	3	13.638	1.72414	0.0771443	0.181627	0.785881	0.74082
YTHDF1	53.8046	45	0.943941	0.579614	1	0.193205	4.88571	0.231905	0.181742	2.28857	0.740545
USP13	207.909	54	3.64753	5.31012	3	1.77004	2.06071	0.0653076	0.181768	1.04314	0.740482
DNAJB12	123.118	52	2.15996	2.00131	2	0.667103	3.23782	0.264411	0.181981	1.69502	0.739974
PNN	684.537	57	12.0094	12.7693	3	4.25644	2.82147	0.153971	0.181981	1.49645	0.739973
CAST	128.847	53	2.26048	1.89885	2	0.63295	3.57134	0.193138	0.181994	1.83646	0.739943
RPRD2	177.742	57	3.11827	1.42142	2	0.473808	6.58131	0.0550173	0.18232	2.71837	0.739167
REXO4	276.902	57	4.85792	7.71647	3	2.57216	1.88866	0.351723	0.182363	0.917361	0.739063
INTU	105.834	55	1.85673	9.23806	3	3.07935	0.602961	0.388951	0.182975	-0.729864	0.737609
ICMT	53.4234	47	0.937253	0.547384	1	0.182461	5.13672	0.20485	0.183039	2.36085	0.737455
PCNT	177.452	55	3.11319	5.15876	3	1.71959	1.81043	0.151823	0.183852	0.85633	0.735531
STXBP1	9.96442	19	0.174814	1.23431	2	0.411437	0.424888	0.47388	0.183929	-1.23485	0.73535
KIF2A	80.5768	53	1.41363	1.87077	2	0.623589	2.26692	0.675383	0.184216	1.18073	0.734672
TRIP12	640.843	57	11.2429	15.1135	3	5.03782	2.23169	0.0154872	0.184348	1.15814	0.734362
UBAP2L	305.083	56	5.35234	4.99432	3	1.66477	3.21505	0.118098	0.184412	1.68484	0.734211
HDLBP	119.872	49	2.10302	1.91907	2	0.639689	3.28757	0.224329	0.184463	1.71702	0.734091
HAUS6	190.44	57	3.34105	4.46447	3	1.48816	2.24509	0.604865	0.184556	1.16677	0.733872
RP11-464F9.1	13.7992	28	0.242091	1.58911	2	0.529703	0.457032	0.198688	0.184864	-1.12963	0.733146
STK38	102.862	53	1.8046	2.02234	2	0.674114	2.677	0.332506	0.185307	1.42062	0.732107
PKN2	403.807	56	7.08434	10.8206	3	3.60686	1.96413	0.0867341	0.18555	0.97389	0.731539
RPL23	1.54073	1	0.0270303	0.581	1	0.193667	0.139571	0.151658	0.185555	-2.84093	0.731527
CPT1A	165.166	56	2.89765	3.00082	3	1.00027	2.89686	0.187196	0.185735	1.53449	0.731107
ADIPOR2	52.9063	46	0.928181	0.326655	1	0.108885	8.5244	0.0633658	0.185848	3.0916	0.730842
MIS18BP1	84.2332	52	1.47778	0.812043	1	0.270681	5.45947	0.17507	0.186203	2.44876	0.730013
DNMBP	72.4691	51	1.27139	0.732677	1	0.244226	5.20579	0.195585	0.186413	2.38012	0.729523
NPRL3	67.9901	51	1.19281	0.494341	1	0.16478	7.23878	0.0912426	0.18654	2.85575	0.729227
CDKAL1	252.769	56	4.43454	3.4778	2	1.15927	3.8253	0.147367	0.187009	1.93557	0.728138
OSBPL9	112.186	54	1.96818	2.57868	2	0.85956	2.28975	0.635732	0.187123	1.19519	0.727872
PRMT3	136.012	54	2.38618	2.11843	1	0.706142	3.37917	0.549786	0.187365	1.75667	0.727313
SEC23A	97.075	50	1.70307	1.53695	2	0.512318	3.32424	0.308	0.187369	1.73303	0.727302
STAG2	81.0857	52	1.42256	1.23292	2	0.410975	3.46142	0.145397	0.187579	1.79136	0.726816
RP3-403A15.5	2.0295	5	0.0356052	0.406021	1	0.13534	0.263079	0.0579056	0.187632	-1.92643	0.726693
RP11-449K6.5	84.1641	53	1.47656	1.94938	2	0.649793	2.27236	0.52036	0.187709	1.18419	0.726516
SYNC	0.304422	1	0.00534074	1.1309	2	0.376965	0.0141677	4.03546e-15	0.187744	-6.14125	0.726434
FOXN3	9.79717	11	0.17188	1.708	2	0.569332	0.301898	0.578569	0.187749	-1.72787	0.726423
FKBP5	136.763	53	2.39936	1.72136	1	0.573786	4.18162	0.327198	0.188139	2.06406	0.725521
PITPNB	174.495	52	3.06132	2.98861	2	0.996202	3.07299	0.263413	0.188171	1.61964	0.725448
C11orf54	52.454	45	0.920245	0.653311	1	0.21777	4.22576	0.318787	0.18832	2.07921	0.725104
FOXJ3	196.94	55	3.45508	4.73684	2	1.57895	2.18822	0.581826	0.188584	1.12976	0.724494
PCNX2	797.711	57	13.9949	17.8265	3	5.94215	2.35519	0.37645	0.188773	1.23585	0.724061
RP5-900K19.2	393.328	57	6.90049	3.76433	2	1.25478	5.49937	0.0556894	0.188851	2.45927	0.723881
SEC61A1	100.17	53	1.75737	2.00242	2	0.667474	2.63287	0.660255	0.188892	1.39664	0.723786
PTPRS	8.62912	17	0.151388	1.16061	2	0.386871	0.391314	0.580717	0.18933	-1.3536	0.72278
ESPL1	57.0938	46	1.00165	0.494341	1	0.16478	6.07867	0.134324	0.189551	2.60376	0.722273
SNAP23	13.5026	29	0.236888	1.45365	3	0.484551	0.488881	0.337882	0.18964	-1.03244	0.722071
ATAD2	637.021	57	11.1758	18.138	3	6.04599	1.84847	0.25429	0.189693	0.886328	0.72195
MAN1A2	9693.97	57	170.07	278.833	3	92.9443	1.8298	0.138834	0.189701	0.871688	0.72193
TRAPPC3	1.73418	6	0.0304241	0.326655	1	0.108885	0.279415	0.0505611	0.189729	-1.83952	0.721867
CCDC15	49.1742	44	0.862705	1.94799	3	0.649331	1.3286	0.0453832	0.189735	0.409912	0.721853
TNRC6B	46.605	45	0.817632	0.579614	1	0.193205	4.23195	0.315428	0.189997	2.08132	0.721253
WNK1	136.763	54	2.39935	2.21094	3	0.736981	3.25565	0.0506946	0.19018	1.70294	0.720835
CDC14A	91.1591	49	1.59928	1.03532	2	0.345107	4.63417	0.0752611	0.191262	2.21231	0.718371
UBA52	48.627	40	0.853106	0.326655	1	0.108885	7.83492	0.0746885	0.191291	2.96992	0.718306
NASP	73.9165	47	1.29678	0.979966	1	0.326655	3.96987	0.365261	0.191841	1.98909	0.717058
FAM13B	1910.96	57	33.5256	64.9455	3	21.6485	1.54864	0.705616	0.191989	0.630997	0.716724
ME1	618.929	56	10.8584	8.31037	3	2.77012	3.91983	0.0632208	0.192592	1.97079	0.715362
CDH11	12.0084	9	0.210673	2.42456	2	0.808187	0.260674	0.412821	0.192964	-1.93968	0.714523
PUS7	405.8	57	7.11929	10.9719	3	3.65731	1.94659	0.106432	0.193077	0.960949	0.714269
DYRK1A	1172.45	57	20.5693	32.2095	3	10.7365	1.91583	0.0773047	0.193297	0.937968	0.713776
OBSL1	28.6175	33	0.502061	3.7132	2	1.23773	0.405629	0.545648	0.19332	-1.30177	0.713722
PTN	1.0576	2	0.0185544	2.58231	2	0.86077	0.0215556	2.90739e-14	0.19354	-5.53579	0.713229
KAZN	6.42159	13	0.11266	0.985635	2	0.328545	0.342904	0.642397	0.193549	-1.54412	0.71321
FASTKD1	274.44	56	4.81474	5.7056	3	1.90187	2.53159	0.119969	0.193708	1.34004	0.712852
HK1	29.0923	37	0.510391	2.92471	2	0.974902	0.523531	0.209209	0.194008	-0.933654	0.712179
FANCM	65.4438	51	1.14814	5.48212	3	1.82737	0.628299	0.325724	0.194048	-0.670476	0.712092
CFAP97	30.5289	44	0.535595	0.406021	1	0.13534	3.95739	0.364503	0.194192	1.98455	0.711768
TRHDE	14.1384	7	0.248042	20.526	2	6.84201	0.0362528	1.41094e-08	0.194304	-4.78577	0.711518
AGPS	114.938	51	2.01646	1.5683	2	0.522765	3.8573	0.125255	0.194368	1.94759	0.711376
TALDO1	39.8977	41	0.699959	0.583512	1	0.194504	3.59869	0.458391	0.194641	1.84747	0.710766
SSH1	45.7816	42	0.803187	0.579614	1	0.193205	4.15718	0.322928	0.194646	2.05561	0.710754
SYNE2	386.115	56	6.77395	5.28085	3	1.76028	3.84821	0.0633689	0.194816	1.94419	0.710375
ERCC6L2	462.343	56	8.11128	11.9303	3	3.97676	2.03967	0.172092	0.194822	1.02834	0.710362
TRAPPC9	374.839	57	6.57611	6.1416	3	2.0472	3.21225	0.0978713	0.194861	1.68358	0.710276
OPA1	35.8847	41	0.629556	0.406021	1	0.13534	4.65164	0.246199	0.194931	2.21774	0.71012
ACP6	92.5786	50	1.62419	0.989533	2	0.329844	4.9241	0.0612785	0.194995	2.29986	0.709977
UBE2G1	547.577	57	9.60661	16.3421	3	5.44736	1.76353	0.0647907	0.195093	0.81847	0.709759
ARAP2	285.844	53	5.01481	2.86006	1	0.953352	5.26019	0.183616	0.195282	2.39511	0.709338
IFFO1	5.80189	8	0.101787	7.33994	2	2.44665	0.0416028	5.11314e-12	0.195348	-4.58717	0.709191
SLC35A5	4.97234	8	0.087234	0.874039	2	0.291346	0.299417	0.680817	0.195614	-1.73977	0.7086
AFTPH	476.844	57	8.36568	9.97521	3	3.32507	2.51594	0.13893	0.195675	1.3311	0.708465
BAIAP2	67.0204	42	1.1758	0.406021	1	0.13534	8.68769	0.0580172	0.196026	3.11897	0.707687
RCL1	192.037	54	3.36907	3.31132	3	1.10377	3.05233	0.0611702	0.196493	1.60991	0.706653
TARS2	101.619	53	1.78278	0.629299	1	0.209766	8.49891	0.0607936	0.196532	3.08728	0.706567
ZNF236	616.5	57	10.8158	17.7882	3	5.92938	1.8241	0.293384	0.196681	0.867184	0.706237
IPP	15.4709	22	0.271419	1.74161	2	0.580538	0.46753	0.241144	0.19711	-1.09687	0.70529
ARFGEF1	293.025	56	5.14079	5.52566	3	1.84189	2.79105	0.0681775	0.197278	1.48081	0.704922
AP4M1	59.7419	46	1.0481	0.581	1	0.193667	5.4119	0.17019	0.197364	2.43613	0.704732
KIF5B	151.382	57	2.65583	3.96319	2	1.32106	2.01037	0.744357	0.197793	1.00746	0.703789
TRIO	2256.57	57	39.589	194.304	3	64.768	0.611243	0.523674	0.198326	-0.710183	0.70262
EZH2	602.389	57	10.5682	17.3148	3	5.77159	1.83108	0.0634694	0.19863	0.872693	0.701955
RABGAP1L	143.229	53	2.51279	2.69892	3	0.899639	2.79311	0.208684	0.198639	1.48187	0.701935
CAP1	48.8462	46	0.856951	4.78129	3	1.59376	0.53769	0.827102	0.198707	-0.895153	0.701787
ZMYM2	476.935	56	8.36729	12.5504	3	4.18347	2.00008	0.0541768	0.198725	1.00006	0.701747
FAM160B1	82.8339	53	1.45323	12.3977	3	4.13256	0.351653	0.0307451	0.199023	-1.50778	0.701096
CTNNB1	479.211	50	8.4072	3.93253	1	1.31084	6.41358	0.113784	0.1991	2.68113	0.700928
CHCHD6	70.2368	47	1.23222	0.732677	1	0.244226	5.04544	0.198913	0.19957	2.33498	0.699904
FLT1	1.21082	3	0.0212424	1.127	2	0.375666	0.0565461	0.000247277	0.199619	-4.14443	0.699797
FNBP1	113.045	53	1.98325	1.88033	1	0.626776	3.16421	0.614979	0.199761	1.66184	0.699489
MYOF	564.461	57	9.90283	13.3633	3	4.45445	2.22313	0.270162	0.200007	1.15259	0.698955
SAFB	125.624	54	2.20393	2.74732	3	0.915773	2.40663	0.427839	0.200393	1.26702	0.698117
ZDHHC20	91.8096	55	1.61069	2.02634	2	0.675448	2.38463	0.480509	0.200394	1.25377	0.698116
LRCH4	1.25989	4	0.0221034	1.127	2	0.375666	0.0588379	1.33825e-05	0.200474	-4.08711	0.697942
PABPC1	210.77	55	3.69772	4.9384	2	1.64613	2.24631	0.586627	0.200797	1.16755	0.697242
PDE4B	40.7608	19	0.715102	36.4725	2	12.1575	0.0588199	9.97442e-08	0.20086	-4.08755	0.697107
ELL2	30.789	33	0.540158	3.52517	2	1.17506	0.459687	0.366275	0.200887	-1.12128	0.697049
RPN1	56.6992	47	0.994723	0.494341	1	0.16478	6.03666	0.129759	0.201074	2.59375	0.696643
SLC38A6	50.3747	43	0.883767	0.820996	1	0.273665	3.22937	0.580712	0.201774	1.69125	0.695136
DMC1	154.055	51	2.70273	1.60926	2	0.536422	5.03844	0.0584669	0.201909	2.33298	0.694845
DNAJC5	157.788	53	2.76821	2.43362	3	0.811206	3.41247	0.0535845	0.202088	1.77081	0.694459
TRPA1	2.34125	3	0.0410746	0.583512	1	0.194504	0.211176	0.114638	0.202175	-2.24348	0.694273
HBS1L	137.015	56	2.40377	2.87468	2	0.958226	2.50856	0.641426	0.202302	1.32686	0.694
SLC30A5	59.4209	54	1.04247	1.56915	2	0.523049	1.99307	0.956762	0.202309	0.994991	0.693984
ASCC1	105.513	49	1.85111	1.42031	1	0.473436	3.90993	0.362593	0.202631	1.96714	0.693295
RTTN	154.961	54	2.71862	3.20404	3	1.06801	2.54549	0.139038	0.202653	1.34794	0.693247
SUN1	118.877	53	2.08557	2.00242	2	0.667474	3.12457	0.397565	0.202661	1.64366	0.693231
HERC2P3	32.4678	37	0.569611	0.326655	1	0.108885	5.23131	0.180102	0.202775	2.38717	0.692985
CPSF2	132.962	53	2.33266	2.57954	1	0.859846	2.71288	0.881007	0.202832	1.43983	0.692863
GLRX3	50.6785	48	0.889097	4.49823	3	1.49941	0.592965	0.431229	0.203207	-0.753982	0.692061
PPP2R3B	196.545	56	3.44816	4.14925	2	1.38308	2.4931	0.52324	0.203344	1.31794	0.691768
PRPSAP2	196.099	54	3.44033	5.21325	3	1.73775	1.97976	0.285761	0.203364	0.985325	0.691727
EPHA5	41.6956	12	0.731502	0.581	1	0.193667	3.77712	0.0294195	0.203376	1.91729	0.6917
ACSF3	103.275	52	1.81184	2.19318	2	0.731059	2.47838	0.465376	0.203784	1.30939	0.690829
RMDN1	40.9087	41	0.717697	0.326655	1	0.108885	6.59132	0.104649	0.203852	2.72057	0.690685
TBC1D8	136.902	47	2.40179	1.8396	1	0.613199	3.91683	0.357207	0.205254	1.96968	0.687709
TANC2	120.441	54	2.113	1.8899	2	0.629965	3.35416	0.205594	0.205268	1.74595	0.687678
ZNF131	456.498	57	8.00873	10.4268	3	3.47559	2.30428	0.46891	0.205441	1.20431	0.687314
ZFAND3	44.7413	46	0.784935	0.494341	1	0.16478	4.76352	0.222356	0.20555	2.25203	0.687083
LIMK1	59.0174	49	1.03539	1.07534	2	0.358447	2.88855	0.224875	0.205583	1.53035	0.687012
SLC3A2	40.4295	43	0.70929	0.629299	1	0.209766	3.38133	0.511222	0.205641	1.75759	0.686891
BABAM1	193.824	54	3.40042	3.83094	3	1.27698	2.66286	0.221173	0.205744	1.41298	0.686672
NUP85	24.6542	42	0.43253	0.326655	1	0.108885	3.97235	0.344084	0.206019	1.98999	0.686094
KIF14	182.309	57	3.19841	5.48483	3	1.82828	1.74941	0.42642	0.206028	0.806871	0.686074
ZNF512	125.657	54	2.20451	3.10131	3	1.03377	2.13249	0.148823	0.206356	1.09254	0.685383
CCDC47	137.917	56	2.4196	2.75651	3	0.918836	2.63333	0.109068	0.206486	1.39689	0.68511
TXNDC11	89.6093	53	1.57209	3.80771	3	1.26924	1.23861	0.00841939	0.206568	0.308725	0.684937
EXOC4	167.38	53	2.93648	3.92119	3	1.30706	2.24663	0.236409	0.206583	1.16776	0.684904
PARP8	195.442	54	3.4288	1.8899	2	0.629965	5.44284	0.0595586	0.206608	2.44436	0.684853
FBN2	11.2337	11	0.197082	10.7003	3	3.56676	0.0552552	1.7904e-10	0.207501	-4.17775	0.68298
RP11-468E2.1	60.2717	50	1.0574	0.812043	1	0.270681	3.90644	0.356124	0.207599	1.96585	0.682775
DUS2	75.9369	51	1.33223	0.988682	1	0.329561	4.04243	0.32682	0.208194	2.01522	0.681531
VWA8	529.888	57	9.29627	13.6498	3	4.54993	2.04317	0.266517	0.208581	1.03081	0.680725
NOX4	4.17901	6	0.0733159	4.13362	2	1.37787	0.0532095	1.84645e-06	0.208616	-4.23217	0.680652
EED	107.656	50	1.88871	2.03855	3	0.679517	2.77949	0.121693	0.208902	1.47482	0.680057
COL8A1	0.863982	1	0.0151576	0.987021	2	0.329007	0.0460707	0.00460182	0.208953	-4.44001	0.679952
TMEM164	27.6133	39	0.484444	2.64364	3	0.881212	0.549748	0.766151	0.209051	-0.863159	0.679748
ADAMTS2	0.344189	1	0.0060384	1.87215	2	0.624051	0.00967612	6.60661e-24	0.209128	-6.69136	0.679589
KPNA6	32.4442	42	0.569197	0.406021	1	0.13534	4.20567	0.295646	0.209173	2.07234	0.679495
PCCB	80.7888	51	1.41735	1.56802	2	0.522674	2.71173	0.423787	0.209429	1.43921	0.678964
EIF4G2	40.2589	50	0.706296	0.955954	2	0.318651	2.21652	0.606516	0.209882	1.14829	0.678024
ALS2	178.678	56	3.13469	3.23673	2	1.07891	2.90542	0.304862	0.210072	1.53875	0.677632
ERBB2	882.935	57	15.4901	14.6225	3	4.87417	3.178	0.00173832	0.210231	1.66812	0.677303
TUBGCP4	133.521	55	2.34248	3.53985	2	1.17995	1.98524	0.913276	0.210308	0.989311	0.677143
ATP5B	26.9663	35	0.473093	2.90084	2	0.966947	0.489265	0.329444	0.210541	-1.03131	0.676664
UBR3	254.84	56	4.47088	6.0656	3	2.02187	2.21126	0.0541756	0.210765	1.14487	0.676202
PLCXD2	1.63722	5	0.0287232	0.326655	1	0.108885	0.263794	0.0837193	0.210965	-1.92252	0.675789
SHOC2	333.612	57	5.85284	24.9229	3	8.30762	0.704514	0.453178	0.211013	-0.505299	0.675691
POM121	94.8969	53	1.66486	2.5334	1	0.844467	1.97149	0.339322	0.211492	0.979286	0.674706
NFYB	35.8549	42	0.629033	0.494341	1	0.16478	3.8174	0.370661	0.211663	1.93259	0.674355
VPS13B	574.276	56	10.075	15.804	3	5.26801	1.91249	0.0550618	0.211664	0.935452	0.674354
YPEL2	87.8675	47	1.54153	3.80414	3	1.26805	1.21568	0.0144391	0.211713	0.281759	0.674253
OLA1	89.4597	50	1.56947	1.79906	2	0.599688	2.61714	0.385359	0.211714	1.38799	0.674251
DCAF6	339.168	57	5.95032	8.3179	3	2.77263	2.14609	0.291024	0.211995	1.10171	0.673674
SRRM2	49.6426	50	0.870923	0.581	1	0.193667	4.49702	0.247979	0.212504	2.16897	0.672632
DYNC1LI1	119.987	53	2.10504	2.60734	3	0.869114	2.42205	0.0969049	0.212726	1.27623	0.67218
ZFPM2	20.3661	13	0.357301	20.7078	2	6.90258	0.0517633	2.85094e-16	0.212807	-4.27193	0.672014
INVS	48.3719	50	0.848631	1.127	2	0.375666	2.259	0.451918	0.212846	1.17569	0.671935
AP4E1	160.309	54	2.81244	3.70451	2	1.23484	2.27758	0.719121	0.213163	1.1875	0.671289
CHM	69.5487	50	1.22015	0.907655	2	0.302552	4.03287	0.105381	0.213165	2.01181	0.671285
SDAD1	127.288	55	2.23312	2.69176	3	0.897255	2.48883	0.0766315	0.213432	1.31547	0.670741
MCCC2	93.4498	46	1.63947	1.07785	2	0.359284	4.56316	0.0636034	0.213587	2.19003	0.670425
BTBD9	57.7835	45	1.01375	0.732677	1	0.244226	4.15086	0.299442	0.213835	2.05341	0.669922
PBX4	57.0594	43	1.00104	0.547384	1	0.182461	5.48633	0.153367	0.21412	2.45584	0.669342
CLHC1	19.5618	31	0.343189	2.05959	2	0.68653	0.49989	0.354153	0.214126	-1.00032	0.669331
ATG4B	40.6226	45	0.712677	0.812043	1	0.270681	2.63291	0.911028	0.21413	1.39666	0.669323
EIF4G3	1014.1	57	17.7913	32.4988	3	10.8329	1.64233	0.377082	0.214136	0.715748	0.66931
WSB2	28.9526	38	0.50794	0.326655	1	0.108885	4.66492	0.22537	0.21428	2.22185	0.669018
GK5	38.4248	42	0.674119	0.494341	1	0.16478	4.09101	0.309555	0.214364	2.03246	0.668849
SOAT1	107.136	52	1.87958	9.15375	3	3.05125	0.616003	0.76564	0.214401	-0.69899	0.668774
KIAA0907	235.645	56	4.13413	4.23994	2	1.41331	2.92513	0.471557	0.214964	1.5485	0.667635
TAB2	54.7474	45	0.960481	0.820996	1	0.273665	3.50969	0.449612	0.215099	1.81134	0.667361
UBXN7	1794.83	57	31.4882	52.8314	3	17.6105	1.78804	0.0631052	0.21518	0.838378	0.667197
RILPL1	124.561	51	2.18527	2.35656	3	0.785521	2.78194	0.0530307	0.215292	1.47609	0.666973
SLC38A10	88.8559	50	1.55888	0.989533	2	0.329844	4.72609	0.0620399	0.21532	2.24065	0.666915
ZDHHC3	52.9783	42	0.929443	0.581	1	0.193667	4.79919	0.209439	0.215539	2.26279	0.666473
CDH13	2.57034	5	0.0450936	1.983	2	0.660999	0.0682205	4.68888e-05	0.215611	-3.87365	0.666328
MAPK1	288.262	55	5.05723	13.013	3	4.33766	1.16589	0.0258755	0.215747	0.221431	0.666056
CUL3	206.236	56	3.61818	4.9674	3	1.6558	2.18516	0.172011	0.215768	1.12774	0.666014
ARHGEF17	7.0174	12	0.123112	1.16313	1	0.387708	0.317538	0.0522813	0.215822	-1.655	0.665904
USP39	68.32	53	1.1986	1.31368	2	0.437892	2.7372	0.256562	0.216091	1.4527	0.665364
SLC10A7	43.8719	45	0.769682	0.653311	1	0.21777	3.53438	0.440038	0.216183	1.82146	0.665178
DENND1B	215.98	57	3.78912	4.01558	2	1.33853	2.83081	0.332696	0.216295	1.50122	0.664953
IQSEC1	66.65	46	1.1693	0.989533	2	0.329844	3.545	0.129909	0.216761	1.82579	0.66402
USP37	166.454	57	2.92025	5.00124	3	1.66708	1.75172	0.493023	0.216785	0.80877	0.66397
SLC25A32	115.806	51	2.03169	2.17551	2	0.725169	2.80168	0.306821	0.216966	1.48629	0.663609
MAP7	126.394	42	2.21743	1.17668	1	0.392227	5.65344	0.140907	0.217471	2.49913	0.662598
VPS53	141.584	53	2.48393	4.21582	3	1.40527	1.76757	0.584134	0.217557	0.821771	0.662427
EPRS	139.018	53	2.43891	3.4824	3	1.1608	2.10106	0.186663	0.217699	1.07112	0.662144
PKD2	108.081	51	1.89615	9.27015	3	3.09005	0.613632	0.563319	0.218011	-0.704555	0.661522
PML	2.72706	6	0.0478431	0.579614	1	0.193205	0.24763	0.106518	0.218037	-2.01374	0.66147
L2HGDH	94.7615	53	1.66248	2.30097	2	0.766991	2.16754	0.79496	0.21825	1.11606	0.661045
DCLK2	82.8107	33	1.45282	20.0784	3	6.69279	0.217072	0.0222468	0.218661	-2.20375	0.66023
WDR59	125.871	55	2.20826	3.08167	2	1.02722	2.14974	0.976069	0.218768	1.10416	0.660017
LRCH1	97.0923	49	1.70337	2.14791	2	0.71597	2.37911	0.380615	0.21887	1.25042	0.659813
VTA1	60.5644	44	1.06253	0.953405	2	0.317802	3.34338	0.146899	0.218929	1.74131	0.659697
EPHB2	46.0851	34	0.80851	4.7791	3	1.59303	0.507529	0.849747	0.219077	-0.978438	0.659404
UBE2R2	220.514	56	3.86867	6.45168	3	2.15056	1.79891	0.229999	0.219267	0.847124	0.659026
TRA2B	231.279	55	4.05753	6.30913	3	2.10304	1.92936	0.208819	0.21948	0.948123	0.658605
RP11-163O17.1	1.47929	4	0.0259524	0.987021	2	0.329007	0.0788809	0.000866615	0.219719	-3.66418	0.658133
AC069513.3	230.499	56	4.04383	3.25828	3	1.08609	3.72329	0.0945355	0.220259	1.89658	0.657066
FOPNL	143.151	55	2.51141	3.51645	2	1.17215	2.14257	0.57799	0.220303	1.09934	0.65698
ZDHHC7	63.9365	44	1.12169	0.812043	1	0.270681	4.14397	0.292763	0.220362	2.05101	0.656864
SETX	135.747	56	2.38153	3.56832	3	1.18944	2.00223	0.298582	0.22048	1.00161	0.65663
GPI	41.4862	38	0.727828	0.406021	1	0.13534	5.37776	0.15635	0.220693	2.42701	0.656211
MAGI2	3.46869	9	0.0608543	2.86722	2	0.955741	0.0636723	6.42154e-09	0.220818	-3.97319	0.655966
FBXL17	90.1658	49	1.58186	1.15923	1	0.386409	4.09374	0.300984	0.220876	2.03342	0.655852
PSPC1	189.143	55	3.3183	3.83137	2	1.27712	2.59826	0.642749	0.221152	1.37755	0.655309
RP11-152F13.10	2.9693	6	0.052093	0.579614	1	0.193205	0.269626	0.0925344	0.221436	-1.89097	0.654751
CTR9	2.82308	8	0.0495278	1.20891	2	0.402971	0.122907	0.00310126	0.221579	-3.02437	0.654471
POLR1E	22.5682	28	0.395934	2.89316	3	0.964388	0.410554	0.320641	0.221635	-1.28435	0.654362
ATP13A3	152.516	56	2.67572	12.5124	3	4.17079	0.641539	0.239632	0.221641	-0.640392	0.654351
NECTIN3	371.214	51	6.51252	33.3713	3	11.1238	0.585459	0.280909	0.221672	-0.772359	0.65429
KIAA1671	39.7537	40	0.697433	0.406021	1	0.13534	5.15317	0.172247	0.221693	2.36546	0.654248
MTX3	2.12954	6	0.0373604	0.406021	1	0.13534	0.276047	0.0876528	0.221694	-1.85701	0.654246
ORC4	353.306	56	6.19836	10.8359	3	3.61197	1.71606	0.156409	0.221948	0.7791	0.653749
AKAP7	52.0754	41	0.913604	5.0735	3	1.69117	0.540221	0.59002	0.221964	-0.888379	0.653718
FLI1	4.59454	4	0.080606	3.77042	2	1.25681	0.0641356	0.000466141	0.222359	-3.96273	0.652945
INPP4B	245.218	53	4.30208	1.72136	1	0.573786	7.4977	0.0718988	0.222608	2.90645	0.65246
MEGF8	31.992	41	0.561263	0.326655	1	0.108885	5.15464	0.171437	0.222656	2.36587	0.652365
ZKSCAN1	2474.54	57	43.413	70.2402	3	23.4134	1.8542	0.104782	0.222683	0.890793	0.652313
PHLDB2	456.55	52	8.00965	6.56061	3	2.18687	3.66261	0.123871	0.22274	1.87287	0.652201
DHX34	453.384	57	7.9541	10.2934	3	3.43112	2.31822	0.179766	0.223009	1.21302	0.651677
B3GLCT	62.2583	46	1.09225	0.629299	1	0.209766	5.20699	0.166906	0.223322	2.38045	0.651068
ING5	96.5859	49	1.69449	1.1387	1	0.379566	4.46428	0.241312	0.223371	2.15843	0.650972
DERL1	89.4208	52	1.56879	1.72221	2	0.57407	2.73274	0.310064	0.223659	1.45035	0.650414
GARS	176.677	56	3.09959	3.72068	3	1.24023	2.49922	0.064934	0.224127	1.32148	0.649506
MYOCD	3.01785	6	0.0529447	6.87341	2	2.29114	0.0231085	4.43167e-23	0.224129	-5.43543	0.649502
RP11-463D19.2	41.1408	39	0.721769	0.629299	1	0.209766	3.44082	0.455678	0.224301	1.78275	0.649169
GPR180	2.44649	9	0.0429209	1.12364	2	0.374547	0.114594	0.000283219	0.224637	-3.12539	0.648519
FBXL20	50.5102	48	0.886144	0.581	1	0.193667	4.57562	0.225903	0.224935	2.19397	0.647943
ASCC2	46.5983	47	0.817515	0.629299	1	0.209766	3.89727	0.333868	0.225077	1.96246	0.647669
XYLT1	9.98866	11	0.17524	5.3862	2	1.7954	0.0976048	4.47531e-05	0.225824	-3.3569	0.64623
OCRL	51.7671	46	0.908195	0.900362	1	0.300121	3.0261	0.623365	0.225835	1.59746	0.646208
TRAPPC8	222.692	57	3.90689	6.2513	3	2.08377	1.87491	0.570411	0.226007	0.906825	0.645878
ME3	157.2	46	2.75789	2.33868	1	0.779561	3.53775	0.422513	0.226015	1.82283	0.645863
SCMH1	579.064	57	10.159	18.1844	3	6.06146	1.676	0.176201	0.22606	0.745024	0.645776
BACE2	183.506	53	3.2194	2.32261	2	0.774204	4.15833	0.129453	0.226068	2.056	0.645761
TOR1AIP2	8.89626	18	0.156075	1.11618	2	0.372059	0.41949	0.488149	0.22687	-1.25329	0.644222
TRIM16L	45.3988	38	0.796471	0.326655	1	0.108885	7.31478	0.0746633	0.226886	2.87081	0.644193
CHFR	42.3517	40	0.743013	0.583512	1	0.194504	3.82004	0.348222	0.226887	1.93359	0.64419
ATP8B1	92.6419	48	1.6253	16.883	3	5.62767	0.288804	0.0258949	0.227324	-1.79184	0.643354
ZNF577	89.3296	44	1.56719	1.36838	2	0.456127	3.43585	0.137989	0.227349	1.78067	0.643306
MTMR3	164.104	53	2.87901	4.28275	3	1.42758	2.01671	0.131594	0.227632	1.012	0.642766
WDFY3	276.986	57	4.8594	7.74925	3	2.58308	1.88124	0.0875584	0.228446	0.911684	0.641217
VCL	100.061	54	1.75545	8.00101	3	2.667	0.658212	0.402471	0.228519	-0.603376	0.641077
AC068533.7	510.428	56	8.95488	8.48306	3	2.82769	3.16686	0.0988781	0.228554	1.66305	0.641012
CACUL1	228.899	57	4.01577	6.53759	3	2.1792	1.84277	0.786518	0.228573	0.881879	0.640975
CHD1	134.07	57	2.35211	3.61917	2	1.20639	1.94971	0.688722	0.228622	0.963262	0.640882
ZNF142	61.4316	49	1.07775	1.402	2	0.467332	2.30617	0.427982	0.228736	1.2055	0.640666
LHFPL2	145.645	48	2.55518	2.29592	2	0.765306	3.33877	0.223842	0.229028	1.73932	0.640111
ZBTB8OS	47.7917	42	0.838451	0.583512	1	0.194504	4.31072	0.256338	0.229385	2.10793	0.639434
ANXA2	372.847	57	6.54117	45.9405	3	15.3135	0.42715	0.0447746	0.229846	-1.22718	0.638563
SLC30A9	123.856	55	2.1729	2.87773	1	0.959242	2.26523	0.773083	0.229946	1.17966	0.638373
CCDC134	485.594	57	8.5192	12.8562	3	4.28539	1.98797	0.863526	0.229984	0.991293	0.638302
RRAS2	63.3963	47	1.11222	24.1674	2	8.05579	0.138064	1.65033e-09	0.229998	-2.85659	0.638277
NUSAP1	373.312	57	6.54933	9.8267	2	3.27557	1.99945	0.939974	0.230002	0.999602	0.638269
DBP	65.5763	42	1.15046	0.547384	1	0.182461	6.30524	0.103525	0.230182	2.65655	0.637929
SPATA6	194.459	48	3.41156	2.33981	2	0.779936	4.37416	0.0646014	0.230229	2.129	0.637839
RAB2A	260.838	54	4.57611	7.33928	3	2.44643	1.87053	0.257897	0.230266	0.903446	0.637771
LOXL2	6.7043	14	0.117619	2.40625	2	0.802083	0.146642	0.00189091	0.230396	-2.76963	0.637525
XPC	11.6206	25	0.20387	1.21281	2	0.40427	0.504291	0.417107	0.230563	-0.987672	0.63721
CCDC125	64.7429	47	1.13584	0.583512	1	0.194504	5.83968	0.123464	0.23076	2.54589	0.636839
CAB39	68.2362	47	1.19713	0.547384	1	0.182461	6.56099	0.0941997	0.230775	2.71391	0.63681
XPO5	199.111	57	3.49318	5.32591	3	1.7753	1.96765	0.333628	0.231002	0.976477	0.636383
FBN1	27.4935	30	0.482342	8.70723	3	2.90241	0.166187	1.81851e-05	0.231085	-2.58912	0.636229
ZNF710	27.2339	32	0.477787	2.96554	2	0.988512	0.48334	0.444202	0.231112	-1.04889	0.636178
SMC1A	152.327	55	2.6724	4.3329	3	1.4443	1.85031	0.30183	0.231255	0.887768	0.63591
USP3	1105.31	57	19.3915	28.7295	3	9.57651	2.0249	0.230108	0.231552	1.01785	0.635351
GPSM2	136.587	57	2.39627	3.94293	3	1.31431	1.82321	0.53746	0.231594	0.866484	0.635272
RPRD1B	473.678	57	8.31013	11.6489	3	3.88296	2.14016	0.187885	0.231658	1.09772	0.635153
BRD1	113.36	52	1.98877	2.46203	3	0.820678	2.42333	0.187102	0.231744	1.27699	0.634991
AVIL	3.01949	6	0.0529735	0.547384	1	0.182461	0.290327	0.0890283	0.231914	-1.78425	0.634673
TBC1D32	161.142	57	2.82705	2.24317	3	0.747724	3.78087	0.0508948	0.231972	1.91872	0.634564
RP11-293G6.1	149.916	57	2.6301	3.24936	2	1.08312	2.42827	0.391639	0.232102	1.27993	0.634322
ADSL	41.8152	40	0.733599	0.547384	1	0.182461	4.02058	0.300466	0.232277	2.0074	0.633994
SLC25A15	3.7856	9	0.066414	0.583512	1	0.194504	0.341453	0.0527041	0.23261	-1.55024	0.633372
SNCAIP	0.302122	1	0.00530039	1.78991	2	0.596637	0.00888377	2.24842e-27	0.232696	-6.81461	0.633212
SHPRH	110.002	52	1.92986	2.53038	2	0.84346	2.28803	0.528299	0.232765	1.19411	0.633083
ADAMTS7	3.29895	7	0.0578764	1.25754	2	0.419179	0.138071	0.0179748	0.233687	-2.85652	0.631366
TRPC1	382.556	56	6.7115	9.32458	3	3.10819	2.15929	0.176015	0.233796	1.11056	0.631163
TLK1	430.299	57	7.5491	6.93377	3	2.31126	3.26623	0.0511418	0.23386	1.70763	0.631044
MMP14	1.35427	4	0.0237591	0.874039	2	0.291346	0.0815492	0.000447094	0.233943	-3.61618	0.63089
RBFOX2	57.1837	48	1.00322	0.987021	2	0.329007	3.04924	0.182981	0.233944	1.60845	0.630889
POLE2	140.986	56	2.47344	3.56825	2	1.18942	2.07954	0.710783	0.234022	1.05627	0.630743
GANAB	153.114	55	2.68621	2.73253	3	0.910844	2.94914	0.157594	0.234025	1.5603	0.630737
CUX1	358.806	57	6.29484	7.69139	3	2.5638	2.45528	0.0552558	0.234177	1.29589	0.630455
GMDS	62.971	45	1.10475	0.547384	1	0.182461	6.05474	0.111724	0.234438	2.59806	0.629973
DLC1	18.5826	20	0.32601	9.56408	3	3.18803	0.102261	1.51954e-07	0.234576	-3.28967	0.629716
CHPT1	33.3306	37	0.584748	3.36157	3	1.12052	0.521852	0.286491	0.234632	-0.938286	0.629614
SH3PXD2A	82.4067	28	1.44573	31.4764	2	10.4921	0.137792	0.00232652	0.234673	-2.85944	0.629536
SEPT2	148.765	57	2.60992	3.79604	3	1.26535	2.06261	0.274505	0.234853	1.04447	0.629203
CDC14B	450.732	57	7.90757	34.3474	3	11.4491	0.690669	0.579669	0.235109	-0.533933	0.62873
CDCA2	42.9871	44	0.75416	0.583512	1	0.194504	3.87735	0.324865	0.235121	1.95507	0.628709
SDHB	18.2904	31	0.320884	1.86361	2	0.621203	0.516553	0.255552	0.235166	-0.953013	0.628626
ANGPT1	6.12016	10	0.107371	2.91691	2	0.972303	0.11043	0.000119968	0.235249	-3.1788	0.628471
DDB1	64.334	50	1.12867	1.57304	2	0.524348	2.15251	0.752575	0.235386	1.10602	0.628219
ANKH	84.7549	43	1.48693	0.581	1	0.193667	7.67777	0.064505	0.235405	2.94069	0.628184
SPATS2	141.31	56	2.47913	3.04399	2	1.01466	2.44331	0.630816	0.235433	1.28883	0.628133
AP4S1	55.4884	45	0.97348	0.406021	1	0.13534	7.19283	0.0747805	0.235503	2.84656	0.628004
MYO18A	45.1287	43	0.791732	0.579614	1	0.193205	4.0979	0.282844	0.235679	2.03488	0.62768
PRC1	106.719	53	1.87226	2.34835	2	0.782782	2.39181	0.592597	0.235771	1.2581	0.62751
SPAG16	340.342	56	5.97092	5.3293	2	1.77643	3.36118	0.173395	0.236007	1.74897	0.627075
RP4-798C17.7	2.1405	8	0.0375527	0.326655	1	0.108885	0.344884	0.0536338	0.236067	-1.53582	0.626966
OSMR	51.9476	44	0.911361	0.820996	1	0.273665	3.3302	0.472439	0.236181	1.73561	0.626756
SEC24B	265.134	56	4.65148	8.55585	3	2.85195	1.63098	0.712665	0.236207	0.705742	0.626707
KIAA0922	29.1328	35	0.511102	0.326655	1	0.108885	4.69396	0.20273	0.236272	2.2308	0.626587
ATP6V1A	43.7508	42	0.767558	0.710155	1	0.236718	3.2425	0.504317	0.236587	1.6971	0.626009
ADGRB3	6.25105	10	0.109668	0.985635	2	0.328545	0.333798	0.805466	0.236622	-1.58295	0.625945
MED30	36.4002	40	0.638601	0.494341	1	0.16478	3.87547	0.322947	0.236918	1.95437	0.625401
YY1AP1	361.333	57	6.33918	26.3973	3	8.79909	0.720435	0.50123	0.236979	-0.473059	0.62529
TUBD1	36.3783	46	0.638216	0.653311	1	0.21777	2.93069	0.648217	0.237166	1.55124	0.624948
CCT2	784.844	57	13.7692	25.0375	3	8.34584	1.64983	0.146341	0.237218	0.722315	0.624852
LNPEP	41.8756	43	0.73466	0.326655	1	0.108885	6.74711	0.0859154	0.23731	2.75427	0.624685
C14orf145	834.733	56	14.6444	21.8247	3	7.2749	2.01301	0.372207	0.237315	1.00935	0.624674
PPIP5K2	47.0202	47	0.824915	0.547384	1	0.182461	4.52104	0.221043	0.237327	2.17666	0.624652
PHF20	530.947	57	9.31485	12.2437	3	4.08125	2.28235	0.150793	0.237528	1.19052	0.624286
MARCH6	352.631	57	6.18651	9.55469	3	3.1849	1.94245	0.0531443	0.2376	0.957879	0.624154
OTUD7B	66.0178	51	1.15821	0.547384	1	0.182461	6.34769	0.0987483	0.237689	2.66623	0.623991
BARD1	1409.19	57	24.7227	42.3632	3	14.1211	1.75076	0.491987	0.238186	0.807985	0.623083
FLVCR1	260.886	56	4.57694	6.31373	3	2.10458	2.17476	0.19563	0.238477	1.12085	0.622554
HNRNPUL2-BSCL2	40.9232	46	0.717952	0.581	1	0.193667	3.70715	0.358316	0.238486	1.89031	0.622537
ZNF143	11.3465	21	0.199062	1.45365	3	0.484551	0.410818	0.211702	0.238748	-1.28343	0.62206
ERI3	580.356	56	10.1817	16.7895	3	5.5965	1.8193	0.274423	0.238936	0.86338	0.621718
STAG1	430.464	57	7.55201	13.2736	3	4.42455	1.70684	0.106742	0.238959	0.77133	0.621677
ACOX1	37.9202	38	0.665267	0.494341	1	0.16478	4.03729	0.289505	0.239018	2.01339	0.621569
ATXN2	1070.06	57	18.7729	35.5853	3	11.8618	1.58264	0.222954	0.239102	0.662336	0.621416
PDE5A	47.7794	35	0.838235	35.3223	2	11.7741	0.0711931	7.17266e-15	0.239108	-3.81212	0.621405
DDX21	337.718	57	5.92488	10.2425	3	3.41415	1.73539	0.0589391	0.239215	0.795259	0.621211
PLPP4	21.9442	8	0.384986	0.326655	1	0.108885	3.53571	0.0303085	0.239283	1.822	0.621089
APLP2	137.09	54	2.40509	2.97996	2	0.993319	2.42127	0.348191	0.239363	1.27576	0.620944
BCKDK	3.2272	9	0.0566175	0.494341	1	0.16478	0.343594	0.0575136	0.239389	-1.54122	0.620896
DET1	15.0784	28	0.264534	1.5683	2	0.522765	0.506028	0.321027	0.239503	-0.98271	0.620689
SAE1	81.3292	51	1.42683	1.09477	1	0.364922	3.90995	0.312485	0.239701	1.96715	0.62033
USP40	50.6104	49	0.887902	1.11618	2	0.372059	2.38646	0.409347	0.239709	1.25487	0.620315
VPS54	96.6361	53	1.69537	2.16232	3	0.720772	2.35216	0.157954	0.240001	1.23398	0.619788
TFAP4	40.0313	39	0.702304	0.326655	1	0.108885	6.44996	0.0942331	0.240021	2.68929	0.619751
FBXL5	245.658	56	4.30978	8.05236	3	2.68412	1.60566	0.22649	0.240304	0.683166	0.619239
CRAMP1	62.3701	48	1.09421	1.1387	1	0.379566	2.8828	0.667949	0.240331	1.52747	0.61919
CCDC144B	11.1228	18	0.195137	1.36838	2	0.456127	0.427813	0.572627	0.240345	-1.22495	0.619165
MAP3K7	46.5091	45	0.815949	3.97231	3	1.3241	0.616228	0.425881	0.240975	-0.698464	0.618029
DHPS	37.0696	47	0.650344	0.547384	1	0.182461	3.56429	0.391329	0.241006	1.83361	0.617972
RDH11	98.4494	52	1.72718	2.03129	2	0.677098	2.55086	0.303851	0.241397	1.35098	0.617268
USP30	34.8287	43	0.611029	0.579614	1	0.193205	3.1626	0.527288	0.241444	1.66111	0.617183
HAS2	16.6788	12	0.292611	7.36884	2	2.45628	0.119128	0.0109198	0.242406	-3.06942	0.615457
RP11-379B18.5	15.7211	21	0.275809	4.37502	3	1.45834	0.189125	0.0023468	0.242501	-2.40259	0.615287
SLC5A6	2.00436	7	0.0351642	1.11618	2	0.372059	0.0945126	5.26316e-05	0.242789	-3.40335	0.614772
LYST	143.772	54	2.52232	2.90999	3	0.969995	2.60034	0.0918492	0.243137	1.3787	0.614149
PIGK	56.5298	46	0.99175	1.2045	2	0.401499	2.47012	0.329058	0.243176	1.30458	0.614079
SNW1	26.237	39	0.460297	0.406021	1	0.13534	3.40103	0.436287	0.243261	1.76597	0.613928
DHX29	63.885	47	1.12079	1.5827	2	0.527568	2.12445	0.764533	0.243431	1.08709	0.613625
SLF1	303.143	56	5.3183	6.66162	3	2.22054	2.39505	0.177877	0.24381	1.26006	0.612949
P4HA2	8.86962	16	0.155607	3.20323	2	1.06774	0.145735	0.000252927	0.243839	-2.77858	0.612898
SULT1A1	3.83016	7	0.0671958	0.629299	1	0.209766	0.320337	0.0795039	0.244127	-1.64234	0.612384
LIN54	111.218	53	1.9512	2.60975	2	0.869915	2.24298	0.510777	0.244133	1.16541	0.612374
CCDC102A	9.61128	18	0.168619	1.23682	2	0.412274	0.408997	0.709985	0.244148	-1.28984	0.612347
BZW2	258.784	56	4.54008	2.45289	1	0.817631	5.55272	0.131194	0.244561	2.47319	0.611613
PTCD3	54.2796	50	0.952274	1.39166	2	0.463885	2.05282	0.584162	0.244564	1.03761	0.611608
FAM228B	340.296	55	5.9701	4.86137	3	1.62046	3.68421	0.0646171	0.244953	1.88136	0.610917
CPED1	5.20772	9	0.0913636	5.7722	2	1.92407	0.0474846	1.01938e-14	0.245014	-4.3964	0.610808
PIR	86.4821	41	1.51723	0.629299	1	0.209766	7.23296	0.0707969	0.245449	2.85459	0.610038
CTD-2207O23.3	40.5116	41	0.71073	0.579614	1	0.193205	3.67864	0.355199	0.24565	1.87917	0.609683
KIFAP3	34.5641	39	0.606388	0.494341	1	0.16478	3.67998	0.35479	0.245713	1.8797	0.609571
ANKDD1A	3.88943	9	0.0682355	0.579614	1	0.193205	0.353178	0.0571971	0.245897	-1.50153	0.609247
GALNT7	115.91	50	2.03351	1.8958	2	0.631934	3.21791	0.157435	0.24614	1.68612	0.608819
PDS5B	394.915	57	6.92833	10.5863	3	3.52876	1.96339	0.0963255	0.246143	0.973349	0.608812
FAM63B	8.57215	17	0.150389	2.36953	2	0.789842	0.190403	0.00686924	0.24639	-2.39287	0.608377
ARHGAP24	3.5022	9	0.0614421	1.81531	2	0.605103	0.10154	1.69322e-05	0.247064	-3.29988	0.60719
PIKFYVE	153.411	57	2.69142	4.23197	3	1.41066	1.90792	0.772466	0.247071	0.931998	0.607179
PABPC1L	50.5353	46	0.886585	0.907655	2	0.302552	2.93036	0.217847	0.247277	1.55108	0.606816
TEAD1	389.431	57	6.83212	11.9986	3	3.99952	1.70823	0.241487	0.247403	0.772506	0.606595
ARL6IP6	1.7717	5	0.0310825	0.326655	1	0.108885	0.285461	0.114671	0.247405	-1.80863	0.606592
FBXW4	459.566	57	8.06256	14.1697	3	4.72323	1.707	0.331072	0.247444	0.771463	0.606523
RYK	1014.77	57	17.8029	30.8984	3	10.2995	1.72853	0.0679083	0.247466	0.789542	0.606485
CNIH4	52.5319	46	0.921612	0.906269	2	0.30209	3.05079	0.193559	0.247763	1.60918	0.605964
TNS1	2.568	6	0.0450527	1.7119	2	0.570632	0.0789523	6.83136e-06	0.247773	-3.66288	0.605945
UBP1	131.82	55	2.31263	10.2027	3	3.4009	0.680004	0.236565	0.24783	-0.556385	0.605846
RAVER2	183.5	53	3.21929	3.5696	3	1.18987	2.70559	0.116228	0.247906	1.43594	0.605714
NCKAP5	6.29321	13	0.110407	3.58875	2	1.19625	0.0922944	5.33583e-07	0.247964	-3.43761	0.605612
COL6A3	1.14495	4	0.0200869	3.6743	2	1.22477	0.0164006	1.35377e-30	0.248338	-5.93011	0.604957
VAPB	928.189	57	16.284	30.4597	3	10.1532	1.60383	0.289918	0.248611	0.681519	0.60448
DIAPH1	67.5533	44	1.18515	1.1309	2	0.376965	3.14391	0.145097	0.24892	1.65256	0.603941
SHROOM3	117.171	51	2.05564	2.02875	2	0.676249	3.03977	0.164637	0.249472	1.60396	0.602978
SLC39A9	27.66	37	0.485262	0.326655	1	0.108885	4.45665	0.217811	0.249556	2.15596	0.602831
SETD5	70.1765	53	1.23117	1.8997	2	0.633233	1.94425	0.723198	0.249948	0.959217	0.60215
GPATCH8	61.4091	51	1.07735	1.49117	3	0.497056	2.16747	0.0582309	0.250408	1.11601	0.601352
CDC42BPA	354.765	57	6.22394	8.97894	3	2.99298	2.07951	0.248312	0.250503	1.05625	0.601186
MEG8	9.31778	9	0.16347	5.93636	2	1.97879	0.0826112	3.34156e-05	0.250634	-3.59752	0.60096
PARK7	2.53217	8	0.044424	0.406021	1	0.13534	0.328239	0.0807858	0.250688	-1.60718	0.600867
UVRAG	71.5957	47	1.25607	1.1387	1	0.379566	3.30922	0.453776	0.251085	1.72649	0.60018
RSBN1L	153.978	57	2.70138	4.32857	3	1.44286	1.87224	0.835048	0.251151	0.904766	0.600066
NQO2	39.2241	39	0.688142	0.579614	1	0.193205	3.56173	0.376235	0.251668	1.83258	0.599172
SMC4	282.576	57	4.95748	8.97252	3	2.99084	1.65755	0.393445	0.251699	0.729055	0.599119
METRNL	2.47873	7	0.0434864	0.406021	1	0.13534	0.321312	0.0880543	0.251903	-1.63796	0.598767
NUP205	178.452	56	3.13073	5.20274	3	1.73425	1.80524	0.351243	0.252153	0.852192	0.598336
FOXN2	173.544	54	3.04462	4.62337	3	1.54112	1.97559	0.460233	0.252273	0.982281	0.598129
MLLT10	128.288	53	2.25067	3.44691	3	1.14897	1.95886	0.157233	0.252516	0.970011	0.597712
PRR16	2.09908	3	0.036826	0.494341	1	0.16478	0.223485	0.191368	0.252565	-2.16175	0.597627
TTC39C	845.201	57	14.8281	9.70762	3	3.23587	4.58241	0.0503902	0.253104	2.19611	0.5967
CSPP1	668.312	57	11.7248	19.0517	3	6.35056	1.84626	0.127967	0.25339	0.884604	0.59621
FAM49B	172.917	52	3.03363	3.94836	3	1.31612	2.30498	0.197284	0.2539	1.20476	0.595337
SHQ1	101.86	51	1.78702	2.49538	3	0.831792	2.14839	0.0644556	0.254006	1.10326	0.595155
PRICKLE2	12.8583	19	0.225584	1.53302	3	0.511006	0.44145	0.0918986	0.25432	-1.17968	0.59462
CYTH1	29.6818	38	0.520733	0.406021	1	0.13534	3.84758	0.306404	0.254807	1.94395	0.593789
HLCS	38.3986	40	0.67366	0.579614	1	0.193205	3.48677	0.392004	0.254906	1.80189	0.59362
AGPHD1	3.47523	8	0.0609689	0.579614	1	0.193205	0.315567	0.0970378	0.254963	-1.66398	0.593523
TTC3	521.374	57	9.14692	14.6609	3	4.88697	1.8717	0.791062	0.255437	0.904346	0.592717
LTBP1	94.9127	39	1.66513	30.9474	2	10.3158	0.161416	3.15896e-06	0.255715	-2.63115	0.592243
FMN1	157.899	46	2.77016	155.602	3	51.8675	0.0534084	2.29451e-23	0.255729	-4.22679	0.59222
LSM14A	182.615	54	3.20377	4.29804	2	1.43268	2.23621	0.512597	0.255798	1.16105	0.592102
COG6	49.0524	46	0.860568	0.907655	2	0.302552	2.84437	0.229233	0.255987	1.50811	0.591781
SND1	315.629	56	5.53734	5.49518	3	1.83173	3.02302	0.0705135	0.256248	1.59599	0.591339
ETFDH	4.14304	10	0.0726849	0.579614	1	0.193205	0.376207	0.0512963	0.25626	-1.4104	0.591319
BRIX1	60.3431	46	1.05865	1.16061	2	0.386871	2.73644	0.20993	0.256493	1.4523	0.590924
PRKCI	138.425	54	2.4285	2.9125	3	0.970833	2.50146	0.246566	0.257136	1.32277	0.589837
ZNF507	44.117	42	0.773982	0.494341	1	0.16478	4.69706	0.185866	0.25719	2.23176	0.589745
SS18L1	25.3266	39	0.444327	0.326655	1	0.108885	4.08069	0.262126	0.257351	2.02881	0.589474
LAMA3	85.8795	41	1.50666	1.22702	1	0.409006	3.68371	0.338183	0.257394	1.88116	0.589402
EMSY	317.216	57	5.5652	10.2961	3	3.43204	1.62154	0.636196	0.25831	0.697367	0.587858
LHPP	42.65	42	0.748245	0.629299	1	0.209766	3.56704	0.364897	0.258643	1.83473	0.587299
TRAF5	44.3887	41	0.778749	0.579614	1	0.193205	4.0307	0.268765	0.258743	2.01103	0.587131
PIK3CA	33.5857	39	0.589223	0.494341	1	0.16478	3.57581	0.362319	0.25888	1.83827	0.586902
KANSL3	27.5711	40	0.483703	1.70715	3	0.569051	0.850018	0.0428313	0.258929	-0.234434	0.58682
KMT2E	675.861	57	11.8572	18.7102	3	6.23672	1.90119	0.150518	0.259237	0.926905	0.586302
TAF4B	84.7875	51	1.4875	0.653311	1	0.21777	6.83059	0.0761411	0.259369	2.77201	0.586082
SMYD4	59.7114	47	1.04757	3.60332	3	1.20111	0.87217	0.0142029	0.259486	-0.197319	0.585886
RPA1	393.388	57	6.90154	11.1559	3	3.71862	1.85594	0.145151	0.259978	0.89215	0.585063
AC068491.1	49.9614	41	0.876517	0.326655	1	0.108885	8.04992	0.0522382	0.260052	3.00897	0.58494
SPIRE1	158.307	55	2.77731	2.22161	2	0.740535	3.75041	0.141314	0.260305	1.90705	0.584518
AP1G1	123.975	50	2.175	3.30406	2	1.10135	1.97484	0.704571	0.260509	0.981737	0.584178
CANX	856.058	57	15.0186	27.8303	3	9.27676	1.61894	0.105439	0.260563	0.695054	0.584088
TRIM33	225.753	56	3.96058	6.11268	3	2.03756	1.94379	0.233558	0.260674	0.958871	0.583902
EXO1	42.5023	40	0.745654	0.547384	1	0.182461	4.08664	0.257195	0.26123	2.03092	0.582977
GOLGA1	138.626	55	2.43203	3.99787	3	1.33262	1.82499	0.205676	0.261408	0.867891	0.582682
NRDC	184.664	56	3.23972	5.4187	3	1.80623	1.79363	0.283986	0.264197	0.842885	0.578073
EHBP1	308.239	57	5.4077	7.46878	3	2.48959	2.17212	0.312285	0.264236	1.1191	0.578007
RP11-606E8.2	102.144	56	1.792	3.04606	2	1.01535	1.7649	0.950556	0.264253	0.819586	0.577981
STIL	303.632	57	5.32688	10.0697	3	3.35657	1.587	0.993152	0.264263	0.666301	0.577964
EIF3CL	52.5451	45	0.921844	0.406021	1	0.13534	6.8113	0.0750859	0.264287	2.76793	0.577924
ROCK2	80.1991	49	1.407	1.74696	2	0.582322	2.41619	0.593706	0.264459	1.27274	0.577642
MARK2	46.0169	38	0.807313	0.547384	1	0.182461	4.42457	0.208495	0.264803	2.14554	0.577076
FBXL2	47.6719	41	0.836348	0.583512	1	0.194504	4.2999	0.223426	0.265051	2.1043	0.576671
KDM1B	202.348	57	3.54996	2.79941	2	0.933136	3.80433	0.17641	0.265289	1.92764	0.57628
TDG	38.1031	42	0.668475	3.71011	2	1.2367	0.540529	0.0869551	0.265345	-0.887555	0.57619
EIF3M	112.461	52	1.973	2.38424	2	0.794745	2.48255	0.460024	0.265714	1.31182	0.575586
RPRD1A	265.803	57	4.66322	6.52814	3	2.17605	2.14298	0.105823	0.265894	1.09962	0.575292
KIAA1841	221.688	55	3.88926	5.23623	3	1.74541	2.22828	0.218517	0.266492	1.15593	0.574317
SGO2	9.72751	21	0.170658	1.07534	2	0.358447	0.476104	0.594444	0.266632	-1.07065	0.574088
GABBR2	3.29547	7	0.0578153	0.581	1	0.193667	0.29853	0.13115	0.266849	-1.74405	0.573735
P4HB	108.32	47	1.90035	1.66136	2	0.553788	3.43154	0.154741	0.267356	1.77886	0.572909
PSEN1	570.234	56	10.0041	20.05	3	6.68332	1.49688	0.184704	0.267621	0.581954	0.57248
TIMELESS	64.1312	43	1.12511	1.16313	1	0.387708	2.90195	0.595843	0.267967	1.53702	0.571919
PUM2	402.25	57	7.05702	13.4144	3	4.47146	1.57824	0.225128	0.268154	0.658313	0.571616
PIBF1	94.4082	50	1.65628	2.3554	2	0.785134	2.10956	0.458621	0.268232	1.07694	0.57149
CEP72	343.665	55	6.02922	5.07515	3	1.69172	3.56396	0.0812286	0.268291	1.83348	0.571394
WWC1	51.3353	44	0.90062	0.820996	1	0.273665	3.29095	0.430967	0.26857	1.7185	0.570943
PPIH	4.75132	9	0.0833564	0.812043	1	0.270681	0.307951	0.123875	0.26858	-1.69923	0.570926
SENP7	43.0554	45	0.755358	0.710155	1	0.236718	3.19096	0.466148	0.268648	1.67399	0.570817
PAK1IP1	113.351	51	1.98861	1.74413	2	0.581375	3.42053	0.139396	0.268725	1.77422	0.570692
ST7L	296.672	57	5.20478	8.43293	3	2.81098	1.85159	0.0701906	0.269097	0.888764	0.570091
FCHO1	3.86872	8	0.0678722	0.581	1	0.193667	0.350459	0.0842145	0.269441	-1.51268	0.569536
FNBP1L	33.1803	38	0.582111	0.326655	1	0.108885	5.34611	0.129393	0.269767	2.41849	0.569012
XPR1	118.067	55	2.07135	2.41815	2	0.806051	2.56975	0.243836	0.269798	1.36163	0.568961
SYNE1	100.247	44	1.75871	21.0342	3	7.01139	0.250837	0.00843363	0.270181	-1.99518	0.568346
IFT80	33.1364	41	0.58134	0.629299	1	0.209766	2.77137	0.663856	0.270759	1.4706	0.567417
BLVRB	48.8974	38	0.857849	0.326655	1	0.108885	7.87848	0.0524165	0.270876	2.97792	0.567229
INTS8	127.661	56	2.23966	3.32358	3	1.10786	2.02161	0.272915	0.27133	1.01551	0.566502
ST13	32.2504	42	0.565797	0.547384	1	0.182461	3.10091	0.495534	0.271946	1.63269	0.565517
AP000304.12	11.5922	17	0.203371	1.40451	2	0.468169	0.434396	0.6783	0.271986	-1.20292	0.565453
ZNF3	63.4654	47	1.11343	1.20069	2	0.400231	2.78196	0.191678	0.272343	1.4761	0.564884
DUSP10	2.67154	7	0.0468691	0.406021	1	0.13534	0.346305	0.0915696	0.272422	-1.52988	0.564758
NME7	75.8061	45	1.32993	0.653311	1	0.21777	6.10704	0.0934994	0.272443	2.61047	0.564724
GSR	124.069	51	2.17666	1.53115	2	0.510384	4.26475	0.0585633	0.272615	2.09246	0.56445
RNASEH1	3.72694	9	0.065385	0.547384	1	0.182461	0.35835	0.0817368	0.273137	-1.48056	0.56362
SQLE	61.2614	47	1.07476	0.906269	2	0.30209	3.55775	0.114005	0.273221	1.83097	0.563486
NUDCD3	79.4667	49	1.39415	1.71441	2	0.571469	2.43959	0.377482	0.273697	1.28664	0.56273
PAPD7	180.057	56	3.1589	3.86895	3	1.28965	2.44942	0.0608145	0.274141	1.29244	0.562026
PHAX	63.7153	45	1.11781	1.127	2	0.375666	2.97555	0.153059	0.274272	1.57316	0.561819
MICAL1	0.746303	2	0.013093	1.5827	2	0.527568	0.0248177	4.78698e-15	0.274424	-5.33249	0.561578
ZC3H18	144.403	57	2.53339	4.4854	3	1.49513	1.69443	0.632418	0.274882	0.760798	0.560854
WBP4	3.80912	10	0.0668267	1.11618	2	0.372059	0.179613	0.0216804	0.275458	-2.47703	0.559944
SREK1	33.7397	41	0.591925	0.583512	1	0.194504	3.04325	0.51321	0.275554	1.60561	0.559793
LIG3	49.5878	45	0.869962	4.20755	3	1.40252	0.620287	0.779976	0.275728	-0.688992	0.55952
STK24	122.19	53	2.14368	1.46535	1	0.488451	4.38872	0.203561	0.275776	2.1338	0.559443
RALGAPA2	41.3865	44	0.726079	0.581	1	0.193667	3.74912	0.300803	0.276169	1.90655	0.558825
NSMCE2	42.1553	43	0.739567	0.629299	1	0.209766	3.52567	0.351217	0.276293	1.8179	0.558631
VAV2	40.1755	42	0.704834	0.547384	1	0.182461	3.86293	0.278729	0.27644	1.94969	0.558399
SPG11	220.182	57	3.86285	6.70113	3	2.23371	1.72934	0.536864	0.276552	0.790223	0.558223
TMEM38B	80.7293	46	1.4163	1.61052	2	0.536839	2.63823	0.224804	0.276606	1.39957	0.558138
USP38	2.63237	7	0.0461818	0.406021	1	0.13534	0.341227	0.102156	0.276869	-1.5512	0.557725
G2E3	88.4063	52	1.55099	2.07468	3	0.69156	2.24274	0.195323	0.277024	1.16526	0.557483
BCR	49.0156	41	0.859923	0.629299	1	0.209766	4.09943	0.239725	0.277045	2.03543	0.55745
AL035209.2	19.9518	27	0.350031	1.97432	2	0.658106	0.531877	0.223075	0.277071	-0.910836	0.557409
PRPF3	70.1836	52	1.23129	1.58419	3	0.528065	2.33171	0.0601691	0.277273	1.22139	0.557093
ZNF624	1.49125	3	0.0261624	0.326655	1	0.108885	0.240275	0.221079	0.277291	-2.05724	0.557064
HMGCS1	202.055	54	3.54483	4.38426	3	1.46142	2.42561	0.114544	0.277565	1.27835	0.556635
FAM168B	35.6949	41	0.626227	0.494341	1	0.16478	3.80037	0.288993	0.277681	1.92614	0.556455
SGSH	4.46694	13	0.0783674	0.581	1	0.193667	0.404651	0.0508949	0.277868	-1.30525	0.556162
LIN9	55.2396	49	0.969115	1.39555	2	0.465185	2.08329	0.491552	0.277908	1.05886	0.556099
LARP1	62.2152	48	1.0915	1.53947	3	0.513155	2.12703	0.0636343	0.278055	1.08884	0.55587
DHX37	47.1371	45	0.826967	0.732677	1	0.244226	3.38608	0.386404	0.278242	1.75962	0.555578
HERC3	34.7436	39	0.609537	0.581	1	0.193667	3.14735	0.466034	0.278257	1.65414	0.555553
ATF6B	9.57708	24	0.168019	0.989533	2	0.329844	0.509389	0.48264	0.278337	-0.973162	0.555429
KIAA0355	39.1615	41	0.687044	3.50818	3	1.16939	0.587522	0.992935	0.278484	-0.767284	0.5552
MAN1B1	4.1397	10	0.0726262	0.583512	1	0.194504	0.373392	0.0752272	0.278667	-1.42124	0.554914
HDAC5	23.5148	35	0.412541	4.67572	2	1.55857	0.264692	0.01025	0.278684	-1.91762	0.554888
RP11-1023L17.1	30.8695	37	0.54157	0.326655	1	0.108885	4.97378	0.148332	0.278713	2.31434	0.554843
PLEKHA4	7.07596	14	0.12414	1.92045	2	0.640151	0.193923	0.0101229	0.278911	-2.36645	0.554534
MFSD14B	33.0584	40	0.579972	0.326655	1	0.108885	5.32646	0.125692	0.279032	2.41318	0.554345
WDR4	43.3444	43	0.760428	0.581	1	0.193667	3.92648	0.264594	0.279288	1.97324	0.553947
HS2ST1	51.1711	40	0.897738	0.494341	1	0.16478	5.44809	0.118802	0.279671	2.44575	0.553353
RICTOR	602.213	57	10.5651	17.6144	3	5.87146	1.79941	0.185337	0.279901	0.847522	0.552995
GNB1	616.923	56	10.8232	18.7224	3	6.24079	1.73427	0.256488	0.280202	0.794327	0.552529
GTF2H1	34.4905	38	0.605096	0.494341	1	0.16478	3.67213	0.311983	0.280265	1.87662	0.552431
MYLK	29.2174	31	0.512585	14.5257	3	4.84189	0.105865	1.48735e-13	0.280608	-3.2397	0.5519
RRP36	45.7293	42	0.802268	0.710155	1	0.236718	3.38913	0.382032	0.280642	1.76091	0.551848
CFAP45	3.06504	10	0.0537726	0.406021	1	0.13534	0.397314	0.0586206	0.280792	-1.33165	0.551615
USP36	79.1193	53	1.38806	2.02549	2	0.675164	2.05588	0.582582	0.280973	1.03976	0.551336
SUGP2	61.8773	53	1.08557	1.62272	2	0.540908	2.00693	0.706831	0.281003	1.00499	0.551289
FAM117B	38.9195	37	0.682798	0.547384	1	0.182461	3.74215	0.296531	0.281058	1.90387	0.551203
LARP4B	404.512	56	7.09669	10.983	3	3.66099	1.93846	0.181717	0.281094	0.954913	0.551148
GMCL1	38.9797	50	0.683855	0.985635	2	0.328545	2.08147	0.492033	0.281204	1.0576	0.550978
CEP70	830.265	57	14.566	18.0085	3	6.00282	2.42653	0.143675	0.28122	1.2789	0.550954
INTS9	49.2505	44	0.864044	0.653311	1	0.21777	3.96769	0.255789	0.281255	1.9883	0.5509
CDC42	94.7527	52	1.66233	2.05959	2	0.68653	2.42135	0.289036	0.281521	1.27581	0.550489
ARIH2	99.9122	55	1.75284	2.45929	2	0.819764	2.13823	0.641816	0.281599	1.09642	0.550369
RHOQ	2.13107	3	0.0373873	0.494341	1	0.16478	0.226891	0.248899	0.281648	-2.13993	0.550294
EPS15	382.253	56	6.70618	11.5829	3	3.86096	1.73692	0.283595	0.282038	0.796534	0.549693
CDC16	34.9784	43	0.613656	0.629299	1	0.209766	2.92543	0.554924	0.282135	1.54865	0.549543
TTC8	39.392	43	0.691088	0.494341	1	0.16478	4.194	0.221787	0.282389	2.06833	0.549153
CTSC	9.20972	18	0.161574	1.07534	2	0.358447	0.450761	0.715259	0.282708	-1.14956	0.548662
NFATC3	1263.6	57	22.1685	44.3636	3	14.7879	1.4991	0.206751	0.282711	0.584097	0.548658
GTF2A1	36.8853	40	0.64711	0.581	1	0.193667	3.34136	0.392842	0.282875	1.74044	0.548405
ABCC5	46.2104	42	0.810709	0.629299	1	0.209766	3.86482	0.271418	0.282925	1.9504	0.548328
ATF6	110.093	55	1.93145	3.58833	3	1.19611	1.61478	0.44289	0.28293	0.691335	0.54832
SUV39H2	38.4279	42	0.674175	0.653311	1	0.21777	3.09581	0.477438	0.283255	1.63032	0.547823
BMP1	16.5895	24	0.291045	12.16	2	4.05334	0.0718037	3.78044e-18	0.283309	-3.7998	0.54774
RAB35	2.47194	6	0.0433675	0.406021	1	0.13534	0.320432	0.133521	0.28341	-1.64191	0.547585
INTS7	57.8733	52	1.01532	1.16451	2	0.388171	2.61566	0.216057	0.283455	1.38717	0.547516
MRPS6	111.48	51	1.95579	2.29392	2	0.764639	2.5578	0.484339	0.283827	1.3549	0.546947
CEP350	491.462	57	8.62214	15.3451	3	5.11502	1.68565	0.382144	0.284127	0.753304	0.546488
C16orf62	257.292	54	4.5139	6.18692	3	2.06231	2.18876	0.223512	0.284187	1.13011	0.546395
SART3	42.804	44	0.750948	0.906269	2	0.30209	2.48584	0.306584	0.284192	1.31374	0.546388
GSAP	40.2092	42	0.705424	0.581	1	0.193667	3.64246	0.313546	0.284291	1.86491	0.546237
DIP2C	136.603	52	2.39654	3.09524	2	1.03175	2.3228	0.35154	0.284329	1.21586	0.546179
SCARA3	2.67544	3	0.0469375	0.547384	1	0.182461	0.257246	0.21333	0.284373	-1.95878	0.546112
RPS6KC1	465.784	57	8.17165	13.5472	3	4.51574	1.80959	0.0657605	0.284529	0.855664	0.545874
VPS41	67.5952	44	1.18588	0.629299	1	0.209766	5.65334	0.106604	0.28472	2.4991	0.545583
C5orf45	28.928	42	0.507509	0.406021	1	0.13534	3.74987	0.290795	0.284749	1.90684	0.545537
DNAJC6	220.813	53	3.87391	3.43967	2	1.14656	3.37873	0.229016	0.284795	1.75648	0.545467
SETD7	27.8212	40	0.488091	0.406021	1	0.13534	3.6064	0.320915	0.284818	1.85056	0.545433
DCUN1D4	1475.48	57	25.8856	36.8402	3	12.2801	2.10793	0.0731714	0.285114	1.07583	0.544982
EPB41L2	114.216	44	2.0038	12.5254	3	4.17513	0.479937	0.963427	0.285638	-1.05908	0.544184
NBPF1	61.2433	53	1.07444	4.64328	3	1.54776	0.694193	0.887995	0.285713	-0.526592	0.544069
NPHP4	154.796	54	2.71572	3.48989	3	1.1633	2.33451	0.221642	0.286011	1.22312	0.543618
PARD3B	78.0969	46	1.37012	8.33205	3	2.77735	0.49332	0.31045	0.286204	-1.0194	0.543324
RSU1	56.6275	42	0.993464	5.27871	3	1.75957	0.564606	0.381682	0.286365	-0.824684	0.54308
CCNC	41.6951	42	0.731492	0.547384	1	0.182461	4.00903	0.244144	0.286514	2.00325	0.542855
WSB1	130.926	54	2.29695	3.59153	2	1.19718	1.91864	0.970568	0.286525	0.940085	0.542837
SPEN	129.639	55	2.27436	3.51969	3	1.17323	1.93855	0.191031	0.286882	0.954977	0.542296
UTP20	97.2096	50	1.70543	2.33159	3	0.777197	2.19434	0.0685759	0.287195	1.13379	0.541822
PINLYP	2.43698	4	0.0427541	0.494341	1	0.16478	0.259461	0.21635	0.287241	-1.94641	0.541753
PRRC2B	652.498	57	11.4473	20.5375	3	6.84583	1.67216	0.11672	0.287859	0.741716	0.54082
COG2	121.849	54	2.13769	2.76393	3	0.921311	2.32027	0.19076	0.288139	1.21429	0.540397
MICAL3	63.6302	51	1.11632	1.31619	2	0.438729	2.54444	0.239198	0.288237	1.34735	0.540251
KIAA1468	55.6117	47	0.975644	1.03532	2	0.345107	2.82708	0.189991	0.288244	1.49931	0.540239
MAPK6	33.7229	42	0.591629	3.08219	2	1.0274	0.575852	0.058051	0.288342	-0.796229	0.540092
TPD52L2	5.0553	14	0.0886894	0.653311	1	0.21777	0.407261	0.0583355	0.28842	-1.29597	0.539975
APAF1	61.3117	48	1.07564	5.09679	3	1.69893	0.633131	0.354633	0.288788	-0.659424	0.53942
NR1H3	6.88947	15	0.120868	0.910167	2	0.303389	0.398393	0.725851	0.289135	-1.32774	0.5389
NEK7	126.93	52	2.22685	11.0841	3	3.69469	0.602715	0.821407	0.289381	-0.730451	0.538531
DLG5	119.782	53	2.10143	9.42424	3	3.14141	0.668945	0.245558	0.289494	-0.58004	0.53836
DTWD2	104.926	52	1.8408	2.13718	2	0.712395	2.58396	0.341509	0.29034	1.36958	0.537094
FGFR1OP	152.374	56	2.67324	4.08267	3	1.36089	1.96433	0.296559	0.290401	0.974036	0.537002
KATNAL1	98.4853	49	1.72781	8.97318	3	2.99106	0.577659	0.680941	0.290485	-0.79171	0.536876
UBE2Q2P1	112.674	52	1.97673	3.00418	2	1.00139	1.97398	0.988998	0.290576	0.98111	0.53674
PPFIA4	2.66006	5	0.0466678	0.494341	1	0.16478	0.283212	0.19159	0.290615	-1.82005	0.536682
NSD3	80.1865	52	1.40678	1.85781	2	0.619269	2.27168	0.377014	0.291003	1.18376	0.536103
PMPCB	59.7187	53	1.0477	1.16061	2	0.386871	2.70813	0.188527	0.291146	1.4373	0.53589
USP4	65.9335	51	1.15673	1.56915	2	0.523049	2.21151	0.56847	0.292049	1.14503	0.534544
TBC1D31	1102.35	57	19.3395	33.7921	3	11.264	1.71693	0.88752	0.292963	0.77983	0.533188
MBD4	1.71807	4	0.0301415	0.326655	1	0.108885	0.276819	0.204842	0.293003	-1.85298	0.533128
SCLT1	708.652	57	12.4325	21.8885	3	7.29615	1.70398	0.111862	0.293208	0.768906	0.532824
CTDSPL	4.28254	11	0.0751322	0.583512	1	0.194504	0.386276	0.0808506	0.293578	-1.3723	0.532277
CTPS1	105.73	54	1.85491	1.71264	1	0.570881	3.24921	0.405379	0.293678	1.70009	0.532128
LRIG2	74.7894	51	1.31209	1.71051	2	0.57017	2.30124	0.41852	0.293895	1.20241	0.531807
NADK2	98.1053	48	1.72115	2.33048	2	0.776825	2.21561	0.782848	0.294082	1.14771	0.531532
EEF1AKMT1	55.2977	45	0.970134	1.1387	1	0.379566	2.5559	0.754754	0.294499	1.35383	0.530916
RABEP2	3.14972	8	0.0552582	0.494341	1	0.16478	0.335345	0.134647	0.294712	-1.57628	0.530602
LRP12	4.1382	12	0.0726	0.547384	1	0.182461	0.397893	0.07207	0.29478	-1.32955	0.530503
RNF216	327.093	57	5.73847	11.0474	3	3.68248	1.55832	0.829619	0.294809	0.639989	0.530459
TNFRSF19	5.62359	10	0.0986595	4.7643	2	1.5881	0.0621242	2.89335e-12	0.294971	-4.0087	0.530221
USP33	321.911	57	5.64756	9.52268	3	3.17423	1.77919	0.191032	0.294988	0.831223	0.530196
KIAA0430	23.2918	35	0.408629	0.406021	1	0.13534	3.01927	0.48758	0.29527	1.5942	0.529781
NUP153	515.332	57	9.04091	14.6637	3	4.88791	1.84965	0.245606	0.295598	0.88725	0.529298
GMEB2	4.0911	9	0.0717738	0.581	1	0.193667	0.370605	0.0981372	0.295603	-1.43205	0.52929
QSER1	433.389	57	7.60331	9.8056	3	3.26853	2.32621	0.140394	0.295751	1.21798	0.529074
ACACB	32.3636	37	0.567782	0.494341	1	0.16478	3.44569	0.345701	0.29579	1.78479	0.529016
ZNF148	707.415	57	12.4108	23.5482	3	7.84939	1.58112	0.216691	0.295825	0.660944	0.528965
RBM3	16.507	26	0.289596	1.67438	2	0.558127	0.518871	0.398144	0.295826	-0.946552	0.528964
LINC00340	460.671	36	8.08195	1.708	2	0.569332	14.1955	0.000220823	0.295871	3.82736	0.528898
ZNF714	24.9157	31	0.437117	0.326655	1	0.108885	4.01448	0.23421	0.296208	2.00521	0.528403
EXTL3	83.5581	48	1.46593	1.78411	2	0.594703	2.46498	0.378466	0.297349	1.30158	0.526734
OXSR1	126.424	55	2.21796	2.9847	2	0.9949	2.22933	0.369174	0.297626	1.15661	0.526329
USP48	297.048	57	5.21136	9.10491	3	3.03497	1.71711	0.393094	0.297738	0.779979	0.526165
BOP1	38.2185	39	0.6705	0.326655	1	0.108885	6.15787	0.0826444	0.297791	2.62243	0.526089
PTPRF	36.1684	38	0.634534	0.406021	1	0.13534	4.68843	0.158495	0.297844	2.2291	0.526012
TBKBP1	4.3697	11	0.0766614	0.579614	1	0.193205	0.396789	0.0765043	0.297991	-1.33356	0.525797
RP11-449H3.3	123.846	55	2.17274	3.91825	2	1.30608	1.66355	0.927804	0.298013	0.734269	0.525764
ZNF280C	29.4857	39	0.517294	0.581	1	0.193667	2.67105	0.664558	0.298242	1.41741	0.525432
STK33	146.98	38	2.5786	1.15923	1	0.386409	6.67324	0.0684179	0.298264	2.73839	0.525399
ZCCHC2	251.18	55	4.40666	4.97918	2	1.65973	2.65505	0.202628	0.298307	1.40874	0.525336
ANTXR2	44.6178	31	0.782769	1.65885	3	0.552951	1.41562	0.00191722	0.298654	0.501435	0.524831
MOB1A	61.4839	48	1.07866	1.31368	2	0.437892	2.46331	0.254018	0.299048	1.3006	0.524259
SPECC1L	516.097	56	9.05434	14.481	3	4.82699	1.87577	0.0676799	0.299141	0.907484	0.524124
NUP50	56.4737	48	0.990767	4.38836	2	1.46279	0.677315	0.0844642	0.299461	-0.5621	0.52366
CLIP1	439.855	57	7.71676	14.6035	3	4.86782	1.58526	0.163955	0.299783	0.664719	0.523192
SLC11A2	182.015	54	3.19325	3.68862	2	1.22954	2.59711	0.207159	0.299979	1.37691	0.522909
GAS6	8.54839	11	0.149972	1.29367	1	0.431222	0.347783	0.128743	0.299998	-1.52374	0.522881
LMNB1	196.808	56	3.45277	6.07529	3	2.0251	1.70499	0.547888	0.300257	0.769763	0.522507
MYO1E	276.886	54	4.85764	4.92694	3	1.64231	2.95781	0.129793	0.300315	1.56453	0.522423
ITSN1	80.08	51	1.40491	1.74664	1	0.582212	2.41306	0.859163	0.300378	1.27086	0.522331
RP3-329A5.4	4.78269	6	0.0839069	1.96769	2	0.655898	0.127927	0.0104904	0.300392	-2.96661	0.522312
POLB	38.7388	38	0.679628	0.494341	1	0.16478	4.12445	0.215065	0.300687	2.0442	0.521886
FKBP15	29.3564	37	0.515024	0.494341	1	0.16478	3.12552	0.435827	0.301285	1.6441	0.521022
PCMT1	76.7007	50	1.34563	1.84736	2	0.615788	2.18521	0.454163	0.30158	1.12777	0.520597
TFDP1	52.367	46	0.918719	1.15923	1	0.386409	2.37758	0.888835	0.301683	1.24949	0.520449
NEGR1	2.06817	2	0.0362837	0.494341	1	0.16478	0.220194	0.306369	0.30174	-2.18315	0.520367
TUBG1	9.36051	18	0.16422	1.162	1	0.387333	0.423975	0.0581399	0.301887	-1.23795	0.520156
VPS50	184.16	55	3.23088	5.57925	3	1.85975	1.73727	0.216434	0.302226	0.79682	0.519668
RABEPK	40.6196	44	0.712625	0.732677	1	0.244226	2.9179	0.519624	0.302342	1.54493	0.519501
PPP2R5A	34.8252	41	0.610968	0.629299	1	0.209766	2.91261	0.521817	0.302493	1.54231	0.519284
GTF2A2	4.42236	10	0.0775852	0.629299	1	0.209766	0.369865	0.10824	0.302539	-1.43493	0.519218
POLD3	31.9411	41	0.56037	0.547384	1	0.182461	3.07118	0.45401	0.30261	1.61879	0.519117
SETD1B	11.4241	21	0.200423	1.28261	2	0.427536	0.468786	0.741904	0.302797	-1.093	0.518849
OTULIN	132.836	55	2.33045	3.55546	3	1.18515	1.96637	0.230942	0.3028	0.975533	0.518843
ATXN3	57.6336	49	1.01112	1.162	1	0.387333	2.61045	0.694313	0.303028	1.3843	0.518517
MFNG	3.31869	8	0.0582227	0.494341	1	0.16478	0.353335	0.127241	0.303119	-1.50089	0.518386
C19orf47	40.3108	40	0.707207	0.581	1	0.193667	3.65167	0.289605	0.303194	1.86856	0.518279
KCNK2	29.7569	22	0.522051	3.78845	2	1.26282	0.413402	0.2917	0.303506	-1.27438	0.517832
FAM169A	527.298	55	9.25084	4.59037	1	1.53012	6.04581	0.0842669	0.303557	2.59594	0.51776
RPS5	213.972	55	3.7539	6.20503	2	2.06834	1.81493	0.945762	0.303596	0.859914	0.517704
POP1	36.0139	41	0.631822	0.629299	1	0.209766	3.01203	0.475855	0.303664	1.59074	0.517606
ZNF618	13.0583	25	0.229093	1.29115	2	0.430385	0.532298	0.534744	0.30368	-0.909694	0.517583
MLLT4	337.248	57	5.91664	8.54105	3	2.84702	2.07819	0.167677	0.303714	1.05533	0.517536
FBXL3	16.7701	28	0.294212	1.708	2	0.569332	0.516766	0.412966	0.303811	-0.952416	0.517396
SMOX	4.4685	11	0.0783948	0.629299	1	0.209766	0.373724	0.106214	0.304015	-1.41995	0.517105
PPME1	95.1266	33	1.66889	1.55958	2	0.51986	3.21026	0.0074032	0.30447	1.68269	0.516455
TBCCD1	2.70004	8	0.0473692	0.406021	1	0.13534	0.35	0.133393	0.304598	-1.51457	0.516273
SPTY2D1	3.68304	10	0.0646147	0.494341	1	0.16478	0.392126	0.0885394	0.304657	-1.35061	0.516188
PARVA	6.34867	12	0.11138	1.71441	2	0.571469	0.194901	0.0212489	0.305099	-2.35918	0.515559
PCNX4	101.396	52	1.77888	8.1248	3	2.70827	0.656832	0.166599	0.305493	-0.606404	0.514998
DZIP1L	8.69784	16	0.152594	1.07534	2	0.358447	0.425708	0.854763	0.306117	-1.23206	0.514112
SBNO1	221.014	54	3.87744	7.34444	3	2.44815	1.58383	0.281647	0.306131	0.663416	0.514093
THAP4	223.718	57	3.92488	5.04641	2	1.68214	2.33327	0.291841	0.30641	1.22235	0.513697
DNM2	81.8352	51	1.43571	2.32658	2	0.775526	1.85127	0.759174	0.306551	0.888513	0.513497
INTS2	188.052	55	3.29916	5.15825	2	1.71942	1.91877	0.995086	0.306654	0.940179	0.513351
FRG1CP	4.21939	11	0.0740243	0.547384	1	0.182461	0.405699	0.0782992	0.30673	-1.30152	0.513244
HPS5	458.896	57	8.0508	11.4966	3	3.83219	2.10084	0.0652746	0.307021	1.07096	0.512832
THBS1	4.13134	10	0.0724797	0.579614	1	0.193205	0.375145	0.109135	0.307214	-1.41448	0.512558
CECR7	106.726	33	1.87239	1.05933	1	0.353111	5.30255	0.113136	0.307593	2.40669	0.512023
CRYBG3	44.129	43	0.774194	0.710155	1	0.236718	3.27053	0.378247	0.307622	1.70952	0.511982
YTHDC2	82.9759	53	1.45572	2.50963	2	0.836542	1.74016	0.837962	0.307927	0.79922	0.511552
UEVLD	40.0408	48	0.70247	3.24305	3	1.08102	0.649825	0.268697	0.307969	-0.621878	0.511493
PRPF39	70.2521	53	1.23249	1.72407	1	0.574689	2.14463	0.869808	0.308043	1.10073	0.511389
AQR	155.199	57	2.72279	5.12884	3	1.70961	1.59263	0.682859	0.308262	0.671415	0.51108
RP11-645C24.3	3.40949	8	0.0598155	0.494341	1	0.16478	0.363002	0.124812	0.308749	-1.46195	0.510395
KIAA1147	3.42243	8	0.0600427	0.494341	1	0.16478	0.36438	0.123319	0.3088	-1.45648	0.510322
SEMA3D	50.9874	12	0.894516	0.406021	1	0.13534	6.60938	0.0036405	0.309125	2.72451	0.509866
FGGY	374.442	56	6.56916	8.72642	2	2.90881	2.25837	0.689298	0.309317	1.17528	0.509596
RP4-717I23.3	52.888	37	0.92786	0.494341	1	0.16478	5.63089	0.0971195	0.309895	2.49336	0.508785
ZBTB10	113.713	48	1.99497	1.42031	1	0.473436	4.21381	0.196159	0.310416	2.07512	0.508055
ECT2	231.729	57	4.06541	6.71299	3	2.23766	1.81681	0.876593	0.31083	0.861409	0.507478
CDK8	162.848	54	2.85698	4.061	3	1.35367	2.11056	0.0628369	0.310935	1.07762	0.507331
SUCO	432.677	57	7.59083	12.2354	3	4.07847	1.8612	0.158216	0.311067	0.896232	0.507147
POLR2A	489.493	57	8.58759	13.5752	3	4.52507	1.89778	0.181317	0.311176	0.924314	0.506993
ATL1	4.16214	8	0.07302	0.629299	1	0.209766	0.348102	0.146823	0.311443	-1.52242	0.506622
SGIP1	3.502	4	0.0614385	2.41677	2	0.805589	0.0762654	0.000111588	0.311704	-3.71283	0.506257
OSBPL1A	105.529	46	1.85138	1.78991	2	0.596637	3.10303	0.157845	0.311795	1.63368	0.50613
FAM13A	34.2558	39	0.60098	0.547384	1	0.182461	3.29374	0.365499	0.311838	1.71973	0.506071
N4BP1	172.261	56	3.02213	6.0444	3	2.0148	1.49997	0.358392	0.312092	0.58493	0.505717
GLTSCR1L	59.0617	52	1.03617	1.67102	2	0.557008	1.86024	0.835447	0.312093	0.89549	0.505716
RNF2	37.5243	40	0.658321	0.547384	1	0.182461	3.608	0.288412	0.312223	1.8512	0.505536
PHF20L1	91.6904	55	1.6086	2.8603	3	0.953434	1.68717	0.824745	0.312288	0.754605	0.505444
H2AFY	74.2763	51	1.30309	2.06688	3	0.688961	1.89139	0.313167	0.312444	0.919445	0.505227
LAMC1	64.986	52	1.14011	1.62272	2	0.540908	2.10776	0.540552	0.312544	1.07571	0.505088
AGL	30.9869	41	0.543629	0.579614	1	0.193205	2.81375	0.550858	0.312784	1.49249	0.504755
ABHD17B	57.7629	49	1.01338	1.31619	2	0.438729	2.30981	0.295521	0.312848	1.20778	0.504666
VPS8	158.746	57	2.78501	5.04262	3	1.68087	1.65688	0.673716	0.31294	0.728472	0.504538
GTF2H2C	28.0687	37	0.492434	0.494341	1	0.16478	2.98843	0.469548	0.312975	1.57939	0.50449
FBLIM1	8.10927	16	0.142268	0.989533	2	0.329844	0.431318	0.807503	0.313004	-1.21318	0.50445
EHD2	73.6191	43	1.29156	6.68035	3	2.22678	0.580013	0.57275	0.313131	-0.785842	0.504274
FAIM	34.3119	38	0.601962	0.579614	1	0.193205	3.11567	0.420529	0.313152	1.63954	0.504245
FAM98B	8.50508	16	0.149212	2.35231	2	0.784102	0.190297	0.00390486	0.313183	-2.39368	0.504202
C9orf91	45.0137	43	0.789715	0.900362	1	0.300121	2.63132	0.656483	0.313352	1.39579	0.503968
DNAH12	8.85942	14	0.155428	1.127	2	0.375666	0.413741	0.919698	0.313473	-1.2732	0.5038
KRIT1	143.224	56	2.51269	4.02639	3	1.34213	1.87217	0.212033	0.313675	0.904712	0.50352
PQLC2	3.03238	9	0.0531997	0.406021	1	0.13534	0.393081	0.0991853	0.313828	-1.3471	0.503308
SMG1	431.508	57	7.57032	15.7391	3	5.24637	1.44296	0.104343	0.314273	0.529035	0.502693
PRKDC	499.192	57	8.75775	16.9778	3	5.65926	1.54751	0.0841988	0.314368	0.629948	0.502562
PITHD1	5.78954	14	0.101571	0.710155	1	0.236718	0.42908	0.0665848	0.314955	-1.22068	0.501751
SRPK2	102.211	52	1.79318	2.19983	3	0.733277	2.44543	0.107672	0.315117	1.29009	0.501529
HELQ	38.9048	41	0.68254	0.494341	1	0.16478	4.14212	0.200953	0.315143	2.05037	0.501492
CDK13	1409.84	57	24.734	47.4815	3	15.8272	1.56276	0.500779	0.315449	0.644094	0.501071
HSPD1	31.9935	38	0.56129	0.406021	1	0.13534	4.14725	0.20007	0.315474	2.05215	0.501036
ERCC8	28.8439	37	0.506034	0.547384	1	0.182461	2.77338	0.566845	0.315511	1.47164	0.500986
UNK	32.7915	36	0.575289	0.494341	1	0.16478	3.49125	0.30965	0.315747	1.80374	0.50066
RGL1	10.9309	15	0.19177	1.31368	2	0.437892	0.437938	0.837913	0.31575	-1.1912	0.500657
KANSL1	1040.81	57	18.2598	31.464	3	10.488	1.74102	0.10288	0.315988	0.799932	0.50033
GALNT2	63.711	48	1.11774	1.67102	2	0.557008	2.00668	0.642166	0.316133	1.00481	0.50013
RGS12	52.3741	44	0.918845	4.58553	2	1.52851	0.601137	0.254906	0.316339	-0.734233	0.499848
PKP4	154.669	53	2.71349	2.85225	3	0.950751	2.85405	0.096941	0.316354	1.51301	0.499826
NEMP2	8.4812	16	0.148793	0.989533	2	0.329844	0.4511	0.765269	0.316415	-1.14848	0.499743
B4GALT6	65.4284	46	1.14787	1.04172	2	0.347242	3.30567	0.0959501	0.316758	1.72494	0.499272
WDPCP	226.322	57	3.97056	6.0304	3	2.01013	1.97527	0.287691	0.316915	0.98205	0.499057
MTA1	37.3493	42	0.65525	0.820996	1	0.273665	2.39435	0.831923	0.316961	1.25963	0.498994
APOOL	83.124	48	1.45832	2.07362	2	0.691207	2.10981	0.514886	0.31728	1.07711	0.498558
RP11-12J10.3	446.977	57	7.84171	12.8296	3	4.27654	1.83366	0.353148	0.317725	0.874723	0.497949
CTD-2116N17.1	26.4777	30	0.464521	0.326655	1	0.108885	4.26616	0.18465	0.31789	2.09294	0.497723
SNHG4	35.7401	35	0.62702	0.406021	1	0.13534	4.63291	0.15056	0.317912	2.21192	0.497693
NUP88	60.2323	51	1.05671	1.7124	1	0.570802	1.85127	0.464419	0.318035	0.888514	0.497525
MSANTD3	98.5305	50	1.72861	8.13147	3	2.71049	0.637747	0.914509	0.318228	-0.648944	0.497262
MSH2	45.6823	42	0.801444	0.900362	1	0.300121	2.6704	0.620755	0.318252	1.41706	0.497229
ITSN2	96.2406	52	1.68843	2.82092	2	0.940306	1.79562	0.931191	0.318374	0.84448	0.497063
RP11-446H18.5	2.63026	3	0.0461449	0.583512	1	0.194504	0.237244	0.32155	0.318396	-2.07556	0.497032
BSDC1	3.82582	9	0.0671197	0.581	1	0.193667	0.346573	0.161038	0.31857	-1.52877	0.496795
SLIT2	10.5005	9	0.184219	1.7563	2	0.585432	0.314672	0.947506	0.318634	-1.66808	0.496708
SCN9A	6.25962	7	0.109818	5.67276	2	1.89092	0.0580764	3.72609e-08	0.318664	-4.1059	0.496666
RECQL5	32.2057	39	0.565013	0.494341	1	0.16478	3.42889	0.320662	0.318794	1.77774	0.49649
BAZ2B	66.2805	47	1.16282	1.74161	2	0.580538	2.003	0.580555	0.31899	1.00216	0.496223
ATR	183.39	56	3.21737	5.48046	3	1.82682	1.76119	0.556907	0.319362	0.816547	0.495717
ZMPSTE24	50.7772	49	0.890827	4.01765	3	1.33922	0.665186	0.533981	0.319483	-0.588171	0.495552
DNAJC16	119.546	54	2.09729	3.87286	3	1.29095	1.62461	0.868631	0.319662	0.70009	0.495309
LRRC16A	139.14	56	2.44105	1.79201	1	0.597336	4.08656	0.204184	0.319673	2.03089	0.495294
GTF2IP1	40.0709	46	0.702998	1.04172	2	0.347242	2.02452	0.437223	0.319846	1.01758	0.495058
DERA	31.024	42	0.544282	0.579614	1	0.193205	2.81713	0.534905	0.320139	1.49422	0.494662
TAGLN2	4.03541	12	0.0707967	0.494341	1	0.16478	0.429643	0.0715138	0.320218	-1.21879	0.494555
ELF1	92.8066	51	1.62819	2.05959	2	0.68653	2.37162	0.265016	0.3209	1.24587	0.49363
POMT2	23.7821	34	0.417229	2.24098	2	0.746993	0.558545	0.141742	0.321422	-0.840254	0.492924
ATXN10	2098.37	57	36.8135	122.01	3	40.6701	0.905173	0.0183469	0.321676	-0.143734	0.492582
RIN2	37.8245	40	0.663588	3.45347	3	1.15116	0.576453	0.984109	0.322247	-0.794726	0.491811
NPAT	111.402	55	1.95443	3.58002	2	1.19334	1.63778	0.91995	0.322345	0.711741	0.491679
TOP3A	96.2265	54	1.68818	2.86314	2	0.95438	1.76888	0.950618	0.322477	0.822836	0.491501
FBXO38	79.664	53	1.39761	2.2657	3	0.755232	1.85058	0.172979	0.322628	0.887976	0.491297
NMT2	39.8406	45	0.698959	3.35906	3	1.11969	0.624245	0.834696	0.323236	-0.679816	0.49048
SMARCD1	34.7111	38	0.608966	0.629299	1	0.209766	2.90307	0.48817	0.323346	1.53758	0.490332
SLC12A4	8.43161	18	0.147923	1.7119	2	0.570632	0.259227	0.0176189	0.323622	-1.94771	0.489962
KEAP1	51.5995	40	0.905254	0.988682	1	0.329561	2.74685	0.56442	0.323954	1.45778	0.489516
ADGRA2	0.697809	2	0.0122423	3.78845	2	1.26282	0.00969441	8.95929e-39	0.324551	-6.68863	0.488716
CSGALNACT1	61.9266	35	1.08643	0.581	1	0.193667	5.6098	0.0923023	0.324577	2.48795	0.488682
NR1H2	1.4687	2	0.0257666	0.326655	1	0.108885	0.23664	0.338563	0.324663	-2.07923	0.488567
ST7	82.1996	50	1.4421	1.47431	1	0.491436	2.93446	0.472012	0.324743	1.55309	0.48846
UROS	20.1051	33	0.352722	1.80492	2	0.601641	0.586266	0.360337	0.324914	-0.770372	0.488231
XPNPEP3	141.45	56	2.48158	3.96559	3	1.32186	1.87733	0.278196	0.325031	0.908685	0.488075
NONO	7.9726	14	0.13987	0.955954	2	0.318651	0.438944	0.697512	0.325162	-1.18789	0.487901
SLC6A6	100.217	50	1.7582	2.62922	2	0.876407	2.00614	0.727251	0.325328	1.00442	0.487679
SEC11A	191.125	57	3.35307	7.4325	3	2.4775	1.35341	0.822961	0.325555	0.436598	0.487375
DEAF1	29.9942	37	0.526214	2.609	2	0.869668	0.605075	0.385401	0.325967	-0.724814	0.486826
CRK	27.6332	36	0.484793	0.547384	1	0.182461	2.65696	0.612399	0.326033	1.40978	0.486738
ACTN1	42.9213	42	0.753006	4.2956	3	1.43187	0.52589	0.280368	0.326238	-0.927166	0.486466
LARS2	26.4251	38	0.463598	0.547384	1	0.182461	2.5408	0.689261	0.326397	1.34528	0.486254
TERF2	605.34	57	10.62	21.7851	3	7.26171	1.46247	0.755292	0.326408	0.548402	0.486239
KMT5B	92.8712	53	1.62932	2.85816	3	0.95272	1.71018	0.171225	0.326449	0.774145	0.486185
KPNA1	103.585	55	1.81728	3.15221	3	1.05074	1.72953	0.336751	0.326493	0.790379	0.486126
PGM5P2	11.5397	18	0.202452	6.02361	3	2.00787	0.100829	8.27155e-11	0.326555	-3.31002	0.486044
B3GALNT2	183.823	57	3.22496	5.91805	3	1.97268	1.63481	0.649948	0.326685	0.709119	0.485871
WAC	166.459	55	2.92034	4.51446	3	1.50482	1.94066	0.072928	0.326803	0.956544	0.485714
FAM227B	3.4873	7	0.0611808	0.581	1	0.193667	0.315908	0.22105	0.327462	-1.66243	0.484839
SLC1A4	5.82048	13	0.102114	2.29402	2	0.764674	0.133539	2.78988e-05	0.327508	-2.90467	0.484778
CYTOR	35.8764	40	0.629411	0.583512	1	0.194504	3.23598	0.360652	0.327606	1.6942	0.484649
CCDC57	149.063	55	2.61514	5.18262	3	1.72754	1.51379	0.55834	0.32769	0.598168	0.484537
INTS13	51.1097	40	0.896662	0.900362	1	0.300121	2.98767	0.444987	0.327804	1.57902	0.484385
PCSK5	75.1768	25	1.31889	1.84105	2	0.613683	2.14914	0.0412668	0.328147	1.10376	0.483931
FOXK2	732.383	57	12.8488	25.6146	3	8.5382	1.50486	0.313418	0.328666	0.589633	0.483245
CAMK1	3.50406	9	0.0614747	2.49426	2	0.831421	0.0739393	1.96431e-10	0.328843	-3.75752	0.483011
CTNNA1	484.811	57	8.50545	36.5882	3	12.1961	0.697393	0.356275	0.329116	-0.519956	0.482651
ZFYVE26	90.8619	51	1.59407	2.78232	3	0.92744	1.71878	0.368673	0.329208	0.781388	0.48253
EWSR1	26.3589	34	0.462437	2.58482	2	0.861607	0.536715	0.206478	0.329978	-0.897772	0.481515
GREB1L	244.696	51	4.29291	2.45404	1	0.818012	5.24799	0.105866	0.330086	2.39176	0.481373
TLE4	5.64621	11	0.0990562	2.61867	2	0.872891	0.113481	9.88163e-08	0.330131	-3.13948	0.481314
RECQL4	66.6221	46	1.16881	1.39304	2	0.464347	2.5171	0.218118	0.330183	1.33176	0.481245
NRXN3	56.0664	14	0.983621	5.4751	3	1.82503	0.53896	0.0128058	0.330411	-0.891749	0.480946
PDE8A	1043.32	57	18.3039	30.6582	3	10.2194	1.79109	0.0623673	0.330614	0.84084	0.480679
MEIS1	5.09619	8	0.0894069	1.56802	2	0.522674	0.171057	0.0359331	0.33075	-2.54745	0.4805
RLF	254.94	57	4.47263	6.2324	3	2.07747	2.15293	0.05173	0.330919	1.1063	0.480278
ZFYVE16	73.8481	52	1.29558	1.80663	2	0.60221	2.15138	0.452283	0.33096	1.10526	0.480224
FYTTD1	26.9997	31	0.473679	0.326655	1	0.108885	4.35027	0.166943	0.330979	2.1211	0.480199
FHL2	21.7533	24	0.381637	2.16045	3	0.72015	0.529941	0.0518639	0.331484	-0.916097	0.479537
ARL3	7.09697	17	0.124508	1.65747	2	0.552489	0.225359	0.00240997	0.33167	-2.1497	0.479294
TRAPPC4	2.67182	7	0.046874	0.406021	1	0.13534	0.346342	0.18619	0.33202	-1.52973	0.478836
CMIP	30.7429	34	0.539349	0.406021	1	0.13534	3.98513	0.207148	0.332058	1.99463	0.478786
SAP130	124.452	57	2.18337	4.26699	3	1.42233	1.53507	0.670447	0.332362	0.618301	0.478388
ESF1	25.4887	36	0.447171	0.494341	1	0.16478	2.71374	0.565136	0.332776	1.44028	0.477848
GTDC1	220.105	52	3.86149	4.12425	3	1.37475	2.80886	0.2385	0.332795	1.48999	0.477823
AHRR	37.0554	34	0.650095	7.64403	2	2.54801	0.255139	0.00349263	0.332837	-1.97065	0.477768
ADAM19	18.5472	25	0.325389	3.66709	2	1.22236	0.266196	0.0127388	0.333122	-1.90944	0.477397
C6orf106	173.081	55	3.03651	5.72307	3	1.90769	1.59172	0.918751	0.333176	0.670587	0.477326
ANKRD36	94.0697	54	1.65034	2.24242	2	0.747473	2.2079	0.306768	0.333336	1.14267	0.477118
ARL13B	307.742	57	5.39899	7.94121	3	2.64707	2.03961	0.501479	0.333927	1.02829	0.476348
BRWD3	187.119	56	3.28278	4.98327	3	1.66109	1.97628	0.156861	0.334154	0.982787	0.476053
RP11-849H4.2	4.60701	11	0.0808247	0.579614	1	0.193205	0.418338	0.0991798	0.334215	-1.25726	0.475975
CMTR1	21.9704	30	0.385446	2.11653	3	0.70551	0.546336	0.802321	0.334253	-0.872139	0.475924
AHCTF1	109.438	55	1.91996	3.80981	3	1.26994	1.51186	0.401263	0.335149	0.596324	0.474762
PRKRA	4.61778	13	0.0810138	0.547384	1	0.182461	0.444005	0.0745041	0.335247	-1.17135	0.474635
RBBP4	14.4965	30	0.254324	1.29115	2	0.430385	0.590922	0.439711	0.335575	-0.758961	0.47421
KLHL29	8.44044	19	0.148078	1.71441	2	0.571469	0.259118	0.0151519	0.335697	-1.94832	0.474052
TXNRD3	121.068	49	2.12401	2.45099	2	0.816996	2.59978	0.315731	0.336022	1.37839	0.473633
WBSCR16	38.7007	47	0.67896	0.900362	1	0.300121	2.26229	0.909493	0.336142	1.17778	0.473478
AHI1	136.522	55	2.39511	3.97563	3	1.32521	1.80735	0.263097	0.336891	0.853875	0.472511
TLL1	34.7012	23	0.608794	4.58142	1	1.52714	0.39865	0.125737	0.33698	-1.32681	0.472396
RBL2	74.4477	51	1.3061	5.54537	3	1.84846	0.70659	0.726263	0.337148	-0.501055	0.472179
RAF1	25.7063	38	0.450989	0.579614	1	0.193205	2.33425	0.834246	0.337214	1.22296	0.472094
MTCL1	828.373	56	14.5329	72.1472	3	24.0491	0.604301	0.824579	0.3373	-0.726662	0.471984
PRDM2	227.705	54	3.99483	6.08909	3	2.0297	1.96819	0.461272	0.33736	0.976871	0.471906
AKAP1	3.59154	8	0.0630094	0.494341	1	0.16478	0.382384	0.14706	0.337496	-1.3869	0.471731
PLEKHM1	276.185	56	4.84535	13.2352	3	4.41173	1.09829	0.0296591	0.337748	0.135256	0.471407
INSIG1	37.0621	31	0.650212	0.326655	1	0.108885	5.97154	0.0754219	0.337789	2.5781	0.471354
TMTC4	51.5947	43	0.905171	0.900362	1	0.300121	3.01602	0.418169	0.33781	1.59265	0.471328
POLR3C	87.494	51	1.53498	2.22636	2	0.742118	2.06838	0.379004	0.337893	1.0485	0.47122
USP9X	117.358	55	2.05891	3.87631	3	1.2921	1.59346	0.616722	0.337921	0.672159	0.471184
MSRB3	18.2745	22	0.320605	2.07064	2	0.690213	0.464502	0.767869	0.338332	-1.10624	0.470657
LEPROTL1	97.9882	51	1.71909	2.73671	3	0.912235	1.88448	0.0856007	0.338662	0.914168	0.470234
RSF1	574.085	57	10.0717	14.9779	3	4.99263	2.01731	0.303128	0.33877	1.01243	0.470095
RNGTT	203.624	56	3.57235	5.44201	3	1.814	1.96932	0.171437	0.33886	0.977697	0.46998
ATP9B	391.711	57	6.87212	10.6927	3	3.56422	1.92809	0.0754395	0.339072	0.94717	0.469708
TCEA1	141.134	53	2.47604	4.10065	3	1.36688	1.81145	0.373409	0.339398	0.857144	0.46929
TCF7L2	49.4834	41	0.86813	0.710155	1	0.236718	3.66736	0.248733	0.339509	1.87474	0.469149
SLC43A1	26.0966	17	0.457836	3.78504	3	1.26168	0.362878	0.675664	0.339706	-1.46244	0.468897
NUP54	1309.29	57	22.9701	46.3058	3	15.4353	1.48815	0.161724	0.33977	0.573525	0.468815
SUGT1	34.5185	42	0.605587	3.09575	2	1.03192	0.586857	0.430801	0.339818	-0.768919	0.468753
NUP133	145.709	56	2.5563	4.52891	3	1.50964	1.69332	0.694345	0.339838	0.759855	0.468728
GOLM1	117.044	53	2.0534	2.54236	1	0.847452	2.42303	0.748457	0.339838	1.27681	0.468728
CCDC77	60.2384	48	1.05681	1.36198	2	0.453992	2.32782	0.254389	0.33997	1.21898	0.468559
DHTKD1	657.642	57	11.5376	20.4842	3	6.82805	1.68973	0.534712	0.340211	0.756794	0.468251
KDELR2	50.3838	47	0.883926	1.2586	1	0.419532	2.10693	0.918981	0.340256	1.07514	0.468194
POLR1B	28.3562	35	0.497478	0.547384	1	0.182461	2.72648	0.542931	0.340506	1.44704	0.467875
ANKRD13C	529.644	57	9.292	19.6169	3	6.53898	1.42102	0.175104	0.34059	0.506925	0.467769
SECISBP2L	45.5428	43	0.798996	3.6782	2	1.22607	0.651674	0.0953585	0.340595	-0.617777	0.467761
STX6	680.208	57	11.9335	23.9973	3	7.99911	1.49185	0.318	0.340637	0.577102	0.467708
RP11-717K11.2	40.6366	47	0.712922	1.16061	2	0.386871	1.84279	0.565134	0.340719	0.881892	0.467603
CPD	38.6056	41	0.677292	0.579614	1	0.193205	3.50557	0.278185	0.340768	1.80965	0.467541
SHC1	10.1796	21	0.178589	1.15923	1	0.386409	0.462177	0.0640259	0.341015	-1.11348	0.467226
ERI1	26.7697	31	0.469644	0.406021	1	0.13534	3.47009	0.285304	0.341082	1.79497	0.467141
BIVM	27.2789	34	0.478577	2.97315	3	0.99105	0.482898	0.792337	0.341132	-1.05021	0.467077
BPTF	350.687	57	6.1524	10.7496	3	3.58318	1.71702	0.145181	0.341279	0.779907	0.466891
OTUD3	31.4924	39	0.552498	0.629299	1	0.209766	2.63388	0.593635	0.341677	1.39719	0.466384
SKP1	53.76	47	0.943158	0.979966	1	0.326655	2.88732	0.462987	0.341849	1.52973	0.466165
COL12A1	16.7969	20	0.294682	4.70485	3	1.56828	0.187901	0.00156653	0.342196	-2.41195	0.465726
KIF3B	96.6049	54	1.69482	2.83438	2	0.944795	1.79385	0.65364	0.342478	0.843062	0.465367
CASC4	273.485	57	4.79799	9.00557	3	3.00186	1.59834	0.709076	0.342667	0.676574	0.465128
RP11-323F5.2	55.4258	41	0.972382	0.583512	1	0.194504	4.9993	0.113079	0.342768	2.32172	0.465
CCDC171	46.7093	45	0.819462	1.03681	2	0.345603	2.37111	0.320842	0.342921	1.24556	0.464806
ALDH18A1	31.4069	40	0.550998	2.50396	2	0.834655	0.66015	0.24629	0.342954	-0.599134	0.464765
DDX46	124.94	55	2.19193	4.18824	3	1.39608	1.57006	0.830092	0.343313	0.650818	0.46431
FBRSL1	43.3937	38	0.761293	0.710155	1	0.236718	3.21603	0.345095	0.343526	1.68528	0.46404
ZCCHC6	311.358	54	5.46242	8.22288	3	2.74096	1.99289	0.287174	0.343655	0.99486	0.463877
FBF1	21.9773	36	0.385567	0.494341	1	0.16478	2.33989	0.811882	0.3437	1.22644	0.46382
FAM210A	129.659	55	2.27472	3.74519	3	1.2484	1.82211	0.551391	0.343773	0.865611	0.463729
LAPTM4B	244.017	55	4.28101	6.75673	3	2.25224	1.90077	0.139768	0.344134	0.926587	0.463272
PAFAH1B1	40.3977	40	0.708732	0.953405	2	0.317802	2.23011	0.301277	0.344199	1.15711	0.463191
C7orf60	5.12591	15	0.0899283	0.583512	1	0.194504	0.462347	0.0670533	0.34421	-1.11295	0.463177
CCNYL1	134.197	55	2.35433	3.59433	3	1.19811	1.96504	0.11055	0.344274	0.974559	0.463096
ZNF124	176.963	56	3.10461	5.45814	3	1.81938	1.70641	0.385866	0.344431	0.770964	0.462898
BRCA1	224.396	57	3.93677	8.02566	3	2.67522	1.47157	0.979734	0.344601	0.557354	0.462684
DNMT3A	47.6378	40	0.83575	0.581	1	0.193667	4.31541	0.161149	0.344814	2.1095	0.462415
RIT1	56.187	40	0.985736	0.874039	2	0.291346	3.38338	0.0943884	0.345006	1.75847	0.462173
ATP2B4	103.778	50	1.82066	14.5028	3	4.83426	0.376616	0.00906555	0.345072	-1.40883	0.46209
ZNF215	160.314	45	2.81252	2.13009	2	0.710029	3.96113	0.10952	0.345764	1.98591	0.46122
HMMR	21.7232	32	0.381109	0.326655	1	0.108885	3.5001	0.273648	0.346048	1.8074	0.460864
EPN2	47.5433	45	0.834093	0.987021	2	0.329007	2.53518	0.202306	0.346126	1.34209	0.460765
MIER2	77.4564	52	1.35888	2.44319	3	0.814395	1.66858	0.195756	0.346287	0.738622	0.460564
BBX	269.656	57	4.7308	9.31177	3	3.10392	1.52414	0.732254	0.346917	0.607992	0.459774
YWHAE	291.531	55	5.11458	9.0912	3	3.0304	1.68776	0.0904843	0.347202	0.755108	0.459418
STK40	110.487	54	1.93836	8.03988	3	2.67996	0.723281	0.338756	0.347349	-0.467372	0.459234
ETF1	62.5978	48	1.09821	1.74161	2	0.580538	1.89171	0.638842	0.347897	0.919688	0.45855
FAM120B	192.668	56	3.38014	15.2268	3	5.07559	0.66596	0.813109	0.347947	-0.586493	0.458487
CLUAP1	46.8599	47	0.822104	1.03681	2	0.345603	2.37875	0.310959	0.348404	1.2502	0.457916
TPX2	180.499	57	3.16665	6.0675	3	2.0225	1.56571	0.40365	0.348572	0.646816	0.457707
TMEM209	114.35	54	2.00614	3.15083	3	1.05028	1.91011	0.0536637	0.348762	0.933654	0.457471
RC3H1	89.3042	53	1.56674	2.65058	3	0.883527	1.77328	0.0606506	0.348956	0.82642	0.457229
CCT6B	8.66005	16	0.151931	2.03041	2	0.676802	0.224483	0.0114772	0.349	-2.15532	0.457175
RANBP9	653.826	57	11.4706	19.1095	3	6.36983	1.80078	0.100285	0.349038	0.84862	0.457128
DNAL1	14.3425	24	0.251624	1.402	2	0.467332	0.538426	0.615764	0.349622	-0.893181	0.456401
TDP1	77.5192	47	1.35999	5.98492	3	1.99497	0.681707	0.965488	0.34966	-0.552776	0.456354
SEMA5A	18.6455	18	0.327114	2.37481	2	0.791603	0.41323	0.608443	0.349674	-1.27498	0.456336
DDR1	25.5192	27	0.447705	0.326655	1	0.108885	4.11172	0.177863	0.350505	2.03974	0.455306
EEFSEC	260.095	56	4.56306	6.68828	3	2.22943	2.04674	0.355945	0.350635	1.03333	0.455145
VPRBP	94.8168	54	1.66345	2.48897	3	0.829658	2.00499	0.0812506	0.350936	1.00359	0.454772
GTPBP10	42.92	43	0.752982	0.820996	1	0.273665	2.75147	0.510139	0.350971	1.4602	0.454729
NNT	187.089	49	3.28226	4.63452	3	1.54484	2.12466	0.271809	0.351179	1.08724	0.454472
CERK	15.8913	27	0.278795	1.45504	2	0.485013	0.574819	0.167862	0.35129	-0.79882	0.454334
ZNF346	74.9385	54	1.31471	1.71264	1	0.570881	2.30295	0.827008	0.351315	1.20348	0.454303
CNPY3	23.2482	36	0.407863	1.983	2	0.660999	0.617041	0.359272	0.351316	-0.696562	0.454303
DDX39A	2.90065	7	0.0508885	0.406021	1	0.13534	0.376004	0.180787	0.351433	-1.41118	0.454157
PARP14	23.868	34	0.418737	0.406021	1	0.13534	3.09396	0.371144	0.351459	1.62945	0.454125
ENPP1	13.3524	23	0.234252	1.29115	2	0.430385	0.544284	0.643651	0.351631	-0.877567	0.453913
ANKRD42	56.9652	47	0.99939	1.29367	1	0.431222	2.31757	0.810805	0.352146	1.21262	0.453277
ZNF92	22.2139	29	0.389717	0.326655	1	0.108885	3.57916	0.251128	0.353152	1.83962	0.452038
KIF4A	173.127	57	3.03732	5.28358	2	1.76119	1.72458	0.718873	0.353292	0.786244	0.451866
ZBTB44	870.48	57	15.2716	31.3329	3	10.4443	1.46219	0.380946	0.353439	0.548132	0.451686
ARID3A	4.89588	12	0.0858926	0.583512	1	0.194504	0.441598	0.0992384	0.353797	-1.17919	0.451246
DNM1L	86.869	51	1.52402	2.3491	2	0.783033	1.9463	0.45194	0.353886	0.960733	0.451136
CCDC40	196.398	52	3.44559	3.32971	3	1.1099	3.10441	0.0537998	0.354269	1.63432	0.450666
SDHAF2	3.97447	8	0.0697276	0.547384	1	0.182461	0.38215	0.177447	0.354395	-1.38779	0.450512
NID1	20.5785	18	0.361026	2.32769	3	0.775897	0.465302	0.249787	0.354497	-1.10376	0.450387
ABCA3	26.9553	32	0.472901	0.406021	1	0.13534	3.49416	0.265905	0.354551	1.80494	0.450321
SLC23A2	27.8521	39	0.488634	0.629299	1	0.209766	2.32942	0.793255	0.354636	1.21997	0.450217
PLEKHG3	4.41917	11	0.0775292	0.629299	1	0.209766	0.369598	0.196585	0.354676	-1.43597	0.450168
RAB18	40.4943	45	0.710427	3.27431	3	1.09144	0.650909	0.739089	0.354689	-0.619472	0.450152
TTC39B	9.20522	21	0.161495	0.906269	2	0.30209	0.534593	0.5548	0.355904	-0.903487	0.448668
ADD1	53.6086	49	0.940502	4.08532	3	1.36177	0.690645	0.279347	0.356202	-0.533983	0.448304
SRP72	70.584	48	1.23832	1.78991	2	0.596637	2.07549	0.460587	0.356433	1.05345	0.448023
KIAA0319L	81.8348	50	1.4357	2.52255	3	0.840851	1.70744	0.151888	0.356628	0.771831	0.447785
CDC25C	38.7218	39	0.679329	0.326655	1	0.108885	6.23896	0.0629691	0.35663	2.6413	0.447782
STARD7	36.2329	40	0.635665	0.629299	1	0.209766	3.03035	0.384591	0.356774	1.59948	0.447606
KANK2	90.6628	52	1.59058	12.6631	2	4.22102	0.376822	0.00111967	0.35683	-1.40804	0.447538
CTD-2303H24.2	4.27353	9	0.0749742	0.547384	1	0.182461	0.410905	0.142851	0.35759	-1.28312	0.446615
RP11-432B6.3	28.1642	41	0.494109	2.38949	2	0.796498	0.620352	0.116149	0.357607	-0.688842	0.446594
ARHGEF28	290.317	56	5.09328	23.8993	3	7.96644	0.639342	0.10378	0.357817	-0.645341	0.446339
ANAPC7	105.221	50	1.84599	2.86335	3	0.954449	1.93408	0.0915472	0.357833	0.951651	0.446319
SLC8B1	16.0246	28	0.281133	1.49368	2	0.497893	0.564646	0.193227	0.35817	-0.824581	0.445911
VPS13C	472.774	56	8.29429	11.2564	3	3.75213	2.21056	0.320192	0.358287	1.14441	0.445769
CCDC186	18.3656	30	0.322203	0.326655	1	0.108885	2.95911	0.407479	0.358447	1.56516	0.445575
TIA1	99.6267	55	1.74784	3.1764	2	1.0588	1.65077	0.956664	0.358503	0.723141	0.445508
TP53BP1	159.523	55	2.79866	5.64141	3	1.88047	1.48827	0.590349	0.358699	0.573641	0.445269
NOC2L	28.7982	39	0.505232	0.629299	1	0.209766	2.40855	0.714417	0.358712	1.26816	0.445254
GULP1	50.1761	34	0.880282	0.581	1	0.193667	4.54535	0.133885	0.358733	2.18439	0.445229
CEP192	1354.52	57	23.7634	49.674	3	16.558	1.43516	0.346758	0.358844	0.521214	0.445094
GRIN2A	2.02953	3	0.0356058	0.406021	1	0.13534	0.263083	0.385162	0.359039	-1.92641	0.444858
SMCHD1	294.168	57	5.16084	10.2512	3	3.41706	1.51032	0.0605228	0.359227	0.594853	0.444631
RP1-152L7.5	5.53069	12	0.0970297	0.710155	1	0.236718	0.409895	0.147365	0.359471	-1.28667	0.444336
HERPUD2	260.134	56	4.56376	7.15721	3	2.38574	1.91294	0.495097	0.359997	0.935789	0.443702
[truncated: 2,941 more rows]

## Sheet: Adeno vs. non-adeno
Gene Name	Sum circRNA AD	# cell lines AD circRNA	Sum circRNA non-AD	# cell lines non-AD circRNA	AVE circRNA AD	AVE circRNA non-AD	fold change Ad vs non-Ad	F-test	T-test	log2 fold change	-log10 p-value		significance threshold (-log10 p)
		max 50		max 7									5.17938
TTC7A	164.986	47	3.9746	5	3.29972	0.567799	5.81142	0.000189724	2.08026e-09	2.53889	8.68188		# significant
NRIP1	885.102	49	23.2146	6	17.702	3.31637	5.33778	0.000228412	2.37074e-09	2.41624	8.62512		22
SLC9A8	39.7929	39	0.251606	1	0.795857	0.0359438	22.1417	3.85596e-05	1.02012e-08	4.4687	7.99135
LHPP	42.3984	41	0.251606	1	0.847968	0.0359438	23.5915	2.49024e-05	1.04799e-08	4.5602	7.97964
TALDO1	39.3538	39	0.543842	2	0.787076	0.0776917	10.1308	0.000632102	1.94315e-08	3.34067	7.71149
STX18	38.7288	43	0.400444	1	0.774575	0.0572064	13.54	0.00101832	9.29397e-08	3.75916	7.0318
FAM114A1	31.432	34	0.256886	1	0.628639	0.0366981	17.13	0.000102126	2.0218e-07	4.09846	6.69426
GTPBP10	42.4507	41	0.469228	2	0.849015	0.0670325	12.6657	4.54737e-05	2.48669e-07	3.66286	6.60438
TANK	138.604	50	4.41309	5	2.77208	0.630441	4.39704	0.000930953	3.55911e-07	2.13653	6.44866
ERCC6	188.987	48	5.28524	5	3.77974	0.755035	5.00605	0.000239028	5.56214e-07	2.32367	6.25476
ARHGEF19	33.3019	36	0.508493	2	0.666039	0.0726418	9.1688	0.000361389	9.03807e-07	3.19673	6.04392
MCCC2	91.9317	44	1.51809	2	1.83863	0.21687	8.47806	0.000812143	1.00632e-06	3.08373	5.99727
ZCCHC6	302.164	49	9.19396	5	6.04328	1.31342	4.60117	0.00166825	1.10143e-06	2.202	5.95804
INTS10	42.0322	40	0.513773	1	0.840643	0.0733961	11.4535	0.00191137	1.12154e-06	3.51772	5.95019
RP11-396K3.1	53.6447	44	0.944287	2	1.07289	0.134898	7.95336	0.00823956	1.32208e-06	2.99156	5.87874
TMC5	153.897	40	1.61112	2	3.07794	0.23016	13.373	6.43072e-05	2.55128e-06	3.74125	5.59324
TBC1D15	23.8893	33	0.217621	1	0.477786	0.0310888	15.3684	9.32178e-05	2.7986e-06	3.9419	5.55306
MVP	94.3835	43	2.09597	3	1.88767	0.299424	6.30433	0.00788388	3.54469e-06	2.65634	5.45042
FGD4	342.977	50	13.8289	7	6.85953	1.97556	3.47219	0.00149405	4.49777e-06	1.79585	5.347
TSPAN15	182.246	43	2.54258	2	3.64492	0.363226	10.0349	0.000252245	4.91048e-06	3.32695	5.30888
DENND1B	205.203	50	10.7763	7	4.10407	1.53948	2.66589	8.80856e-06	5.29535e-06	1.41462	5.27611
FNDC3B	2540.79	50	86.0888	7	50.8159	12.2984	4.13191	0.00350785	5.71814e-06	2.04681	5.24275
TMEM189	32.7457	29	0.256886	1	0.654913	0.0366981	17.846	2.3092e-05	7.12326e-06	4.15753	5.14732
CTNNBIP1	68.2154	42	1.37322	3	1.36431	0.196175	6.95456	0.000393619	7.16133e-06	2.79796	5.14501
HMGCL	28.295	36	0.256886	1	0.5659	0.0366981	15.4204	6.38415e-05	7.21637e-06	3.94677	5.14168
USP25	1443.25	49	54.9323	7	28.8649	7.84747	3.67825	0.0183502	7.83537e-06	1.87902	5.10594
RMND5A	114.751	47	2.81218	3	2.29501	0.40174	5.71267	0.00250359	7.97547e-06	2.51417	5.09824
RBM47	28.6598	34	0.286956	1	0.573195	0.0409937	13.9825	0.000112904	1.05133e-05	3.80555	4.97826
ABCC3	51.7789	34	0.217621	1	1.03558	0.0310888	33.3103	3.53346e-07	1.0587e-05	5.0579	4.97523
MKL2	26.4732	33	0.508493	2	0.529463	0.0726418	7.28868	0.00104347	1.08677e-05	2.86566	4.96386
WDR78	332.238	47	8.73166	6	6.64476	1.24738	5.32697	1.24533e-05	1.27605e-05	2.41331	4.89413
FAM160A1	60.3252	38	0.822265	2	1.2065	0.117466	10.2711	0.000131756	1.28822e-05	3.36051	4.89001
POLB	38.2352	37	0.503552	1	0.764705	0.0719359	10.6304	0.00100325	1.4048e-05	3.41012	4.85238
XRRA1	40.7126	31	0.217621	1	0.814251	0.0310888	26.1912	1.43503e-06	1.458e-05	4.71101	4.83624
GPATCH2	55.5631	43	1.06717	2	1.11126	0.152453	7.28921	0.00566063	1.47381e-05	2.86576	4.83156
ABCA5	48.5007	35	0.256886	1	0.970014	0.0366981	26.4323	1.31766e-06	1.56742e-05	4.72423	4.80481
TANC2	116.895	50	3.54641	4	2.33789	0.50663	4.61459	0.00523432	1.73569e-05	2.2062	4.76053
SH3GLB1	108.677	49	4.2613	5	2.17353	0.608757	3.57044	0.0106729	2.34115e-05	1.8361	4.63057
CBWD2	18.0596	31	0.251606	1	0.361191	0.0359438	10.0488	0.00124695	2.58413e-05	3.32895	4.58769
VPS54	92.4798	47	4.15631	6	1.8496	0.593759	3.11506	0.00492261	2.69174e-05	1.63926	4.56997
ZDHHC5	22.8061	31	0.469228	2	0.456121	0.0670325	6.80448	0.00123499	3.05046e-05	2.76648	4.51564
ITCH	703.44	50	45.1234	7	14.0688	6.4462	2.18249	0.00475224	3.05912e-05	1.12598	4.5144
ARHGEF10L	62.3889	45	1.26399	2	1.24778	0.18057	6.91022	0.0119255	3.39062e-05	2.78873	4.46972
MAP3K20	18.567	28	0.217621	1	0.37134	0.0310888	11.9445	0.000227426	3.42733e-05	3.57828	4.46504
STIM1	20.0476	28	0.217621	1	0.400952	0.0310888	12.897	0.000123518	3.52545e-05	3.68896	4.45279
TET3	21.6012	32	0.256886	1	0.432024	0.0366981	11.7724	0.000248585	3.63296e-05	3.55734	4.43974
ZYG11A	57.9972	34	1.23127	2	1.15994	0.175895	6.59451	0.00162531	3.8425e-05	2.72127	4.41539
MTM1	55.5967	42	1.79874	4	1.11193	0.256963	4.32722	0.00192668	4.0269e-05	2.11344	4.39503
GRHL2	416.741	38	5.35249	1	8.33483	0.764641	10.9003	0.000444679	4.11693e-05	3.4463	4.38543
MID2	180.647	46	5.50096	4	3.61294	0.785851	4.59749	0.00898233	4.17891e-05	2.20085	4.37894
TMOD3	427.444	50	20.4522	6	8.54887	2.92174	2.92595	0.0129335	4.32988e-05	1.54891	4.36352
MTUS1	447.852	47	8.1047	4	8.95705	1.15781	7.73617	5.2127e-05	4.69134e-05	2.95162	4.3287
ZNF823	25.9079	30	0.251606	1	0.518159	0.0359438	14.4158	4.59166e-05	5.20345e-05	3.84958	4.28371
RAPGEF2	165.781	49	5.03304	6	3.31562	0.719005	4.6114	0.000132888	5.3497e-05	2.20521	4.27167
CLIP1	416.401	50	23.4547	7	8.32801	3.35067	2.48547	0.0311793	6.13656e-05	1.31352	4.21208
ST7	79.6001	46	2.59947	4	1.592	0.371352	4.28704	0.000988128	6.40031e-05	2.09998	4.1938
TMCO3	308.344	49	10.3271	5	6.16688	1.4753	4.18009	0.0022474	6.66983e-05	2.06353	4.17589
C12orf45	138.504	50	4.53753	4	2.77008	0.648219	4.27337	0.00390438	6.69105e-05	2.09538	4.17451
FAF1	465.192	50	22.2275	6	9.30383	3.17536	2.93001	0.0173801	6.72965e-05	1.55091	4.17201
CRYBG3	43.1892	41	0.93982	2	0.863784	0.13426	6.43367	0.00367895	6.73624e-05	2.68564	4.17158
SP1	36.2029	36	0.801131	2	0.724057	0.114447	6.32656	0.00723061	7.06397e-05	2.66142	4.15095
MARVELD2	16.2756	28	0.217621	1	0.325511	0.0310888	10.4704	0.000471375	7.08398e-05	3.38824	4.14972
MIA2	381.875	49	18.9205	7	7.6375	2.70293	2.82563	0.0333608	7.2685e-05	1.49857	4.13856
ST7L	281.912	50	14.7606	7	5.63823	2.10866	2.67384	0.0165818	7.37535e-05	1.41891	4.13222
EPHB2	45.2288	32	0.85625	2	0.904576	0.122321	7.39507	0.000759225	7.42319e-05	2.88656	4.12941
RIT1	55.0103	38	1.17666	2	1.10021	0.168094	6.54519	0.00116401	7.56917e-05	2.71044	4.12095
CDH1	100.829	40	2.08785	2	2.01659	0.298264	6.76108	0.00109066	7.86269e-05	2.75725	4.10443
SND1	303.199	50	12.4292	6	6.06399	1.7756	3.41518	0.00220936	8.16903e-05	1.77196	4.08783
RCOR1	57.3347	45	1.92561	4	1.14669	0.275088	4.16847	0.0102025	8.17393e-05	2.05952	4.08757
RP11-598P20.5	336.829	50	21.7753	7	6.73658	3.11076	2.16557	0.00687813	8.36611e-05	1.11475	4.07748
SPECC1L	492.385	50	23.7118	6	9.84771	3.3874	2.90716	0.0148689	8.72657e-05	1.53961	4.05916
UTP14A	27.9982	32	11.0984	7	0.559964	1.58549	0.35318	0.581061	8.78769e-05	-1.50152	4.05613
MAP4K3	269.445	50	14.5448	6	5.3889	2.07783	2.59353	0.0174776	8.8317e-05	1.37491	4.05396
TET2	121.806	48	5.67725	6	2.43611	0.811035	3.00371	0.010064	9.5717e-05	1.58674	4.01901
PTTG1IP	216.66	46	8.28627	5	4.33321	1.18375	3.66057	0.00439945	0.000100276	1.87207	3.99881
OSBPL9	107.163	49	5.02315	5	2.14326	0.717592	2.98673	0.028752	0.000108203	1.57857	3.96576
GRHL1	32.8126	31	0.251606	1	0.656253	0.0359438	18.2578	6.40556e-06	0.000115035	4.19044	3.93917
NT5C2	42.906	44	0.790169	1	0.85812	0.112881	7.60197	0.0216463	0.000122059	2.92637	3.91343
ANKRD42	55.1825	44	1.78275	3	1.10365	0.254679	4.33349	0.00644629	0.000124984	2.11553	3.90315
MYO5B	166.687	40	2.80879	2	3.33374	0.401256	8.30826	0.000202116	0.000130425	3.05455	3.88464
SWAP70	58.8272	44	1.14891	2	1.17654	0.16413	7.16835	0.000335504	0.000133234	2.84164	3.87539
EHBP1	291.609	50	16.6293	7	5.83219	2.37562	2.45502	0.00393411	0.000138421	1.29573	3.8588
STAT3	130.156	50	5.40101	5	2.60311	0.771572	3.37377	0.0413947	0.000142315	1.75436	3.84675
CCDC7	429.905	48	18.2829	6	8.5981	2.61185	3.29196	0.00109715	0.000143281	1.71895	3.84381
PPP2R2C	40.9335	24	0.286956	1	0.81867	0.0409937	19.9706	3.17927e-06	0.000146417	4.31981	3.83441
SH2D4A	48.7699	37	1.25	2	0.975398	0.178572	5.46221	0.00630067	0.000146565	2.44948	3.83397
KLHDC1	16.4447	25	0.217621	1	0.328894	0.0310888	10.5792	0.000267987	0.000167192	3.40315	3.77678
GRB14	61.5837	32	0.800889	1	1.23167	0.114413	10.7652	0.000222554	0.000181083	3.4283	3.74212
AGGF1	116.276	47	5.21141	5	2.32552	0.744488	3.12366	0.0215594	0.000190271	1.64324	3.72063
COBLL1	45.226	35	0.776948	1	0.90452	0.110993	8.14938	0.00303684	0.000196459	3.02669	3.70673
MDFIC	27.2364	29	0.400444	1	0.544729	0.0572064	9.52217	0.000598314	0.00019733	3.25129	3.70481
DAPK1	34.9443	24	0.256886	1	0.698887	0.0366981	19.0442	3.76368e-06	0.000197953	4.25128	3.70344
TMEM65	47.4876	35	1.11842	2	0.949751	0.159774	5.94435	0.00152365	0.000205671	2.57152	3.68683
SYNE2	367.783	50	18.332	6	7.35566	2.61885	2.80873	0.00221597	0.000209786	1.48992	3.67822
PPP2R3A	79.065	43	1.54179	2	1.5813	0.220256	7.17939	0.00230219	0.00021034	2.84386	3.67708
CCM2	21.4509	29	0.251606	1	0.429018	0.0359438	11.9358	9.23603e-05	0.000210613	3.57723	3.67651
AP1M2	61.6002	35	0.925948	2	1.232	0.132278	9.31374	6.97308e-05	0.000211078	3.21936	3.67556
KMT2E	637.787	50	38.0738	7	12.7557	5.43912	2.34519	0.0147188	0.000221244	1.2297	3.65513
PEX6	160.497	49	4.98195	5	3.20994	0.711707	4.51019	0.00407658	0.000222184	2.17319	3.65329
EIF4ENIF1	60.5917	46	2.032	3	1.21183	0.290285	4.17464	0.00806034	0.000231993	2.06165	3.63452
VPS13C	450.667	49	22.1078	7	9.01333	3.15826	2.85389	0.00151987	0.000237294	1.51293	3.62471
PTBP3	946.825	50	61.5412	7	18.9365	8.7916	2.15393	0.0342928	0.000240577	1.10697	3.61875
DNAH11	49.5158	29	0.655106	1	0.990317	0.0935866	10.5818	0.00021621	0.000243287	3.40352	3.61388
GFPT1	281.746	50	17.2958	6	5.63491	2.47083	2.28058	0.024486	0.000248354	1.1894	3.60493
ITGB6	101.673	31	0.655106	1	2.03346	0.0935866	21.7281	1.42505e-06	0.00025054	4.44149	3.60112
REEP3	30.0904	33	0.503213	1	0.601807	0.0718875	8.37151	0.00177684	0.000255361	3.06549	3.59284
SRPK1	99.548	48	5.87712	6	1.99096	0.839589	2.37135	0.0253271	0.000255964	1.24571	3.59182
CCDC125	62.2211	42	2.52173	5	1.24442	0.360248	3.45435	0.000699787	0.000260951	1.78842	3.58344
SCEL	124.875	35	0.655106	1	2.4975	0.0935866	26.6865	3.70917e-07	0.000268493	4.73804	3.57107
TMEM165	1061.59	50	86.5474	7	21.2318	12.3639	1.71724	0.000356109	0.000284433	0.780092	3.54602
DHRS3	118.002	42	2.73755	2	2.36004	0.391079	6.03468	0.000973091	0.000288997	2.59328	3.53911
BBS9	307.034	50	14.4038	6	6.14067	2.05769	2.98425	0.0100994	0.000302903	1.57737	3.5187
SCRIB	15.6317	24	0.256886	1	0.312635	0.0366981	8.5191	0.00128621	0.000305575	3.0907	3.51488
DNAL1	14.1249	23	0.217621	1	0.282498	0.0310888	9.08683	0.000682465	0.00031013	3.18378	3.50846
COPS4	30.1281	41	0.604644	1	0.602561	0.0863777	6.97589	0.0305724	0.000315796	2.80238	3.50059
POC5	71.9223	45	2.00914	2	1.43845	0.28702	5.01165	0.0485942	0.000319881	2.32529	3.49501
MCU	354.561	50	19.5632	6	7.09121	2.79474	2.53734	0.00245925	0.000332067	1.34332	3.47877
CBLC	62.9161	28	1.17261	2	1.25832	0.167516	7.51165	0.000133734	0.000352055	2.90913	3.45339
AASDH	12.6926	21	0.217621	1	0.253851	0.0310888	8.16536	0.00179601	0.000353204	3.02952	3.45197
RNF213	309.559	50	21.798	7	6.19118	3.114	1.98818	0.00132208	0.000354634	0.991447	3.45022
CREBRF	39.5071	42	1.09315	2	0.790143	0.156164	5.05969	0.0188926	0.000359772	2.33905	3.44397
GALNT18	67.3603	39	1.80293	3	1.34721	0.257561	5.23062	0.000871129	0.000365909	2.38698	3.43663
LPCAT1	97.5036	44	3.56652	5	1.95007	0.509502	3.82741	0.00189676	0.00037597	1.93637	3.42485
CEP70	791.005	50	39.2598	7	15.8201	5.60854	2.82071	0.0068004	0.000386259	1.49606	3.41312
IFT74	54.2155	42	1.43025	2	1.08431	0.204321	5.30689	0.0260538	0.000395198	2.40787	3.40319
TBC1D30	134.248	36	2.88492	3	2.68495	0.412131	6.51481	0.000489433	0.000402277	2.70372	3.39548
P2RX4	14.5216	26	0.251606	1	0.290432	0.0359438	8.08018	0.00180503	0.000403279	3.01439	3.39439
SEPT9	367.947	50	25.6411	7	7.35893	3.66301	2.00898	0.0131817	0.000408755	1.00647	3.38854
PRKCZ	41.3565	32	0.726114	2	0.827131	0.103731	7.97383	0.000103825	0.000427239	2.99527	3.36933
UXS1	325.465	47	7.75282	2	6.50929	1.10755	5.87722	0.0132355	0.000429142	2.55513	3.3674
EHD1	18.7401	26	0.217621	1	0.374803	0.0310888	12.0559	5.79074e-05	0.000432689	3.59167	3.36382
DNMT3A	46.5098	38	1.12795	2	0.930196	0.161135	5.77276	0.00156646	0.000436518	2.52926	3.36
CERS6	173.131	49	7.17146	5	3.46261	1.02449	3.37983	0.0270343	0.00046317	1.75695	3.33426
SLC9A1	14.7724	25	0.256886	1	0.295448	0.0366981	8.05079	0.00166917	0.000464777	3.00913	3.33276
VRK2	422.182	50	23.7007	7	8.44364	3.38581	2.49383	0.0340276	0.000466966	1.31837	3.33071
CENPN	20.5028	32	0.469228	2	0.410056	0.0670325	6.11727	0.000623411	0.000468029	2.61289	3.32973
CD2AP	328.651	50	15.0805	5	6.57303	2.15436	3.05104	0.00656939	0.000471946	1.6093	3.32611
EPB41L5	139.349	47	5.29269	5	2.78697	0.756099	3.68599	0.00159477	0.000483756	1.88205	3.31537
OXSR1	119.712	48	6.71203	7	2.39423	0.958862	2.49695	0.00524602	0.0005044	1.32017	3.29723
MDM1	19.9353	25	0.251606	1	0.398706	0.0359438	11.0925	9.46531e-05	0.000537497	3.47151	3.26962
USP12	19.7696	25	0.469228	2	0.395391	0.0670325	5.8985	0.000787626	0.000555685	2.56035	3.25517
USP48	279.066	50	17.9815	7	5.58133	2.56878	2.17275	0.024416	0.000561685	1.11952	3.25051
OXR1	220.103	49	13.0226	7	4.40207	1.86037	2.36623	0.00565623	0.000567292	1.24259	3.24619
TCOF1	11.4312	25	0.217621	1	0.228623	0.0310888	7.35388	0.00395189	0.000579061	2.87851	3.23728
GOLGA2	14.5741	26	0.286956	1	0.291482	0.0409937	7.11042	0.00634812	0.000579929	2.82994	3.23663
KLHL2	311.243	49	16.5159	6	6.22486	2.35941	2.63831	0.00523467	0.000580388	1.39961	3.23628
PLPP3	25.5671	31	0.286956	1	0.511341	0.0409937	12.4737	3.7638e-05	0.000598646	3.64081	3.22283
R3HDM2	48.5916	39	1.30003	2	0.971832	0.185718	5.23284	0.0046338	0.000599961	2.38759	3.22188
DNAH5	105.436	43	3.4661	3	2.10872	0.495157	4.25869	0.0154636	0.000602184	2.09041	3.22027
ZNF778	64.4748	46	2.346	3	1.2895	0.335143	3.84759	0.0341227	0.000605136	1.94396	3.21815
C9orf129	50.0029	41	1.82233	3	1.00006	0.260333	3.84146	0.0154616	0.000613071	1.94166	3.21249
PSMA5	21.0197	29	0.400444	1	0.420393	0.0572064	7.34872	0.00375374	0.00061329	2.87749	3.21233
ACAP2	346.629	48	17.6759	6	6.93258	2.52513	2.74543	0.0223333	0.000651157	1.45703	3.18631
EPB41L4B	13.9997	20	0.217621	1	0.279994	0.0310888	9.00626	0.000428687	0.000689071	3.17093	3.16174
ANKAR	68.733	43	2.87613	4	1.37466	0.410875	3.34569	0.00440156	0.000692714	1.7423	3.15945
ESYT2	1152.33	50	74.8844	7	23.0466	10.6978	2.15434	0.0275807	0.000709972	1.10725	3.14876
PPWD1	96.36	41	2.77167	3	1.9272	0.395952	4.86725	0.0016656	0.00071279	2.28311	3.14704
BBS4	33.9671	33	1.04739	3	0.679342	0.149628	4.54022	0.00133285	0.000734926	2.18276	3.13376
TC2N	147.575	40	2.36689	2	2.95149	0.338127	8.72895	5.55048e-05	0.000763554	3.12581	3.11716
EPCAM	184.669	39	4.02841	1	3.69338	0.575488	6.41782	0.03596	0.000765291	2.68208	3.11617
B3GNTL1	110.684	42	3.64997	4	2.21368	0.521424	4.24546	0.00176317	0.000793357	2.08592	3.10053
MIER1	202.436	50	13.3746	7	4.04872	1.91066	2.11902	0.00963714	0.000808922	1.0834	3.09209
AP4S1	53.6003	42	1.88805	3	1.07201	0.269721	3.9745	0.00360832	0.000813538	1.99077	3.08962
MTMR6	16.1703	25	0.286956	1	0.323405	0.0409937	7.88915	0.0012954	0.000814025	2.97987	3.08936
CSGALNACT1	60.0894	32	1.83723	3	1.20179	0.262461	4.57891	0.0008732	0.000827118	2.195	3.08243
CCDC64	16.449	22	0.217621	1	0.328979	0.0310888	10.5819	0.000102739	0.000840944	3.40353	3.07523
VPS37A	232.346	49	14.3036	7	4.64691	2.04338	2.27414	0.0212788	0.000856915	1.18532	3.06706
EYA4	62.5635	30	1.67643	2	1.25127	0.23949	5.22472	0.00194041	0.000882253	2.38535	3.05441
WIPI1	28.3629	22	0.474508	1	0.567259	0.0677868	8.36827	0.000672648	0.000910506	3.06493	3.04072
LPGAT1	350.367	47	15.9514	7	7.00734	2.27877	3.07505	0.000102235	0.000924141	1.62061	3.03426
TSGA10	28.8835	32	0.604644	1	0.577669	0.0863777	6.68772	0.00889093	0.000932139	2.74151	3.03052
ITPKC	306.99	50	17.3601	6	6.1398	2.48002	2.47571	0.0250731	0.000941147	1.30784	3.02634
ARHGAP10	883.12	50	53.684	7	17.6624	7.66914	2.30305	0.00875269	0.000947649	1.20354	3.02335
EFCAB14	25.764	35	0.721173	2	0.51528	0.103025	5.00152	0.0104501	0.00095414	2.32237	3.02039
HOOK3	423.109	50	27.1973	7	8.46218	3.88532	2.17799	0.0083102	0.000990473	1.123	3.00416
AC024067.2	11.1938	23	0.217621	1	0.223876	0.0310888	7.20119	0.00286642	0.00101659	2.84824	2.99285
EPHX2	19.9035	25	0.251606	1	0.398071	0.0359438	11.0748	6.4313e-05	0.00102859	3.46921	2.98776
GPI	40.2516	36	1.23461	2	0.805032	0.176372	4.56439	0.0175004	0.00104017	2.19042	2.9829
SMARCAL1	12.8748	23	0.251606	1	0.257497	0.0359438	7.16388	0.00294688	0.00105132	2.84074	2.97827
FUT8	1320.66	50	70.9702	6	26.4131	10.1386	2.60521	0.00430627	0.00105458	1.3814	2.97692
SKAP2	122.894	49	5.11029	4	2.45789	0.730042	3.36678	0.0338238	0.0010578	1.75137	2.9756
MACC1	54.349	30	0.815565	1	1.08698	0.116509	9.32957	0.000231637	0.00109451	3.22181	2.96078
FAM228B	323.742	49	16.5534	6	6.47485	2.36477	2.73805	0.00347804	0.00112285	1.45315	2.94968
LRIG2	70.8423	46	3.94713	5	1.41685	0.563876	2.51269	0.0099335	0.0011263	1.32923	2.94835
RREB1	531.505	50	38.5159	7	10.6301	5.50227	1.93195	0.0331665	0.00114357	0.950058	2.94174
CPT1A	155	50	10.1663	6	3.1	1.45232	2.13451	0.00629857	0.00116033	1.09391	2.93542
WDR60	307.408	50	15.9168	7	6.14817	2.27383	2.70388	0.0327	0.00116591	1.43503	2.93334
ZFAND3	43.059	43	1.68226	3	0.86118	0.240323	3.58343	0.0160828	0.00118788	1.84134	2.92523
ZNF484	15.0555	20	0.217621	1	0.301109	0.0310888	9.68546	0.000159803	0.00121504	3.27582	2.91541
ESRP1	316.628	34	8.49051	2	6.33257	1.21293	5.22088	0.00149877	0.00121739	2.38429	2.91457
ACOT7	45.8667	34	1.01171	2	0.917334	0.144529	6.34704	0.000675931	0.00122132	2.66608	2.91317
FBXO34	16.5458	20	0.256886	1	0.330917	0.0366981	9.01728	0.00027945	0.00124545	3.17269	2.90467
ATP6V1E1	16.0491	25	0.251606	1	0.320983	0.0359438	8.93014	0.000289259	0.00132714	3.15868	2.87708
PJA2	16.4813	29	0.504577	2	0.329627	0.0720825	4.57291	0.00925397	0.00132824	2.19311	2.87672
MLPH	33.6395	30	0.652864	1	0.672789	0.0932663	7.21363	0.00212124	0.00134863	2.85073	2.87011
ZBTB20	246.834	44	8.40282	4	4.93669	1.2004	4.11253	0.0053795	0.00143733	2.04002	2.84244
ATP8A1	86.445	35	0.503552	1	1.7289	0.0719359	24.0339	2.83596e-07	0.00148236	4.587	2.82905
AC016747.2	153.048	48	7.90773	5	3.06096	1.12968	2.7096	0.0306557	0.00148276	1.43808	2.82893
PAPLN	26.3324	26	0.251606	1	0.526649	0.0359438	14.652	7.13993e-06	0.00148739	3.87303	2.82757
PHLDB2	437.907	48	18.6432	4	8.75814	2.66332	3.28843	0.0210988	0.00154628	1.7174	2.81071
WDR83	13.3521	22	0.217621	1	0.267041	0.0310888	8.58964	0.000355137	0.00156174	3.1026	2.80639
DOCK11	40.95	31	0.251606	1	0.818999	0.0359438	22.7856	3.84694e-07	0.00156832	4.51005	2.80457
SLC22A3	131.019	34	1.99892	3	2.62039	0.28556	9.17631	9.49991e-06	0.00158866	3.19791	2.79897
TRAPPC6B	125.134	49	5.62209	4	2.50268	0.803156	3.11605	0.0149721	0.00159786	1.63972	2.79646
TATDN1	18.6408	29	0.435243	1	0.372816	0.0621776	5.99599	0.0298811	0.00163611	2.584	2.78619
GRAMD1A	30.5721	32	0.673104	1	0.611441	0.0961578	6.35873	0.00870874	0.00164887	2.66874	2.78281
TNIP1	40.6009	38	0.944311	2	0.812018	0.134902	6.01934	0.000786744	0.00167329	2.5896	2.77643
NADK2	93.8348	43	4.27049	5	1.8767	0.61007	3.0762	0.0475863	0.00167943	1.62115	2.77484
MROH1	251.626	50	12.0041	6	5.03252	1.71487	2.93464	0.0259143	0.00170546	1.55318	2.76816
PLD1	128.249	47	5.25669	4	2.56499	0.750956	3.41563	0.0361246	0.00170714	1.77215	2.76773
HK1	28.4192	36	0.673104	1	0.568384	0.0961578	5.91095	0.0397436	0.00172452	2.56339	2.76333
SLK	276.663	49	13.2488	5	5.53325	1.89269	2.92348	0.0259454	0.00173309	1.54769	2.76118
TTC13	294.098	50	21.0979	7	5.88196	3.01399	1.95155	0.0392841	0.00173895	0.964624	2.75971
ZNF730	30.2669	21	0.538562	1	0.605339	0.0769374	7.86794	0.000705085	0.00174614	2.97599	2.75792
CRY2	39.5411	43	1.88477	4	0.790822	0.269253	2.9371	0.0287122	0.00175092	1.55439	2.75673
PARP12	97.1296	44	4.04702	5	1.94259	0.578146	3.36004	0.000156207	0.00178605	1.74848	2.74811
CTD-3092A11.1	18.7637	21	0.251606	1	0.375275	0.0359438	10.4406	6.74862e-05	0.00184629	3.38413	2.7337
INO80D	12.3135	23	0.251606	1	0.246271	0.0359438	6.85155	0.00272259	0.00187074	2.77643	2.72799
AGFG1	265.145	48	14.7217	7	5.30289	2.1031	2.52147	0.000955016	0.00188158	1.33426	2.72548
RDX	127.732	48	7.15609	5	2.55465	1.0223	2.49893	0.0108517	0.00189165	1.32131	2.72316
JADE3	14.9228	18	0.217621	1	0.298455	0.0310888	9.6001	0.000124797	0.00190498	3.26305	2.72011
RNF19A	86.4378	47	4.07388	4	1.72876	0.581983	2.97046	0.0107834	0.00190689	1.57069	2.71967
WWC3	575.142	49	33.4301	6	11.5028	4.77573	2.4086	0.0305843	0.00191147	1.26819	2.71863
DYNLT1	13.9743	22	0.251606	1	0.279486	0.0359438	7.77563	0.000724369	0.00192433	2.95896	2.71572
POLH	47.9387	39	1.87203	3	0.958773	0.267433	3.5851	0.00881044	0.00192509	1.84201	2.71555
GLCCI1	214.774	44	7.54919	4	4.29548	1.07846	3.98299	0.000733828	0.00195147	1.99385	2.70964
RNF149	150.575	50	8.50196	6	3.01151	1.21457	2.47949	0.0251339	0.00195628	1.31005	2.70857
NEDD4	104.748	43	3.27838	4	2.09496	0.46834	4.47316	0.000134474	0.00198522	2.16129	2.70219
ZNF83	74.0109	30	0.251606	1	1.48022	0.0359438	41.1815	8.00968e-09	0.00203934	5.36392	2.69051
GOSR2	46.5841	32	1.19626	2	0.931682	0.170894	5.45182	0.000685242	0.0020441	2.44674	2.6895
RP11-293G6.1	140.603	50	9.31304	7	2.81206	1.33043	2.11364	0.0111528	0.00207145	1.07973	2.68372
LMO7	64.2295	43	1.77897	2	1.28459	0.254138	5.05469	0.0418197	0.00207756	2.33762	2.68245
TMEM260	13.5936	23	0.251606	1	0.271872	0.0359438	7.56381	0.000852311	0.00214879	2.91911	2.66781
HEATR5A	207.553	50	13.5216	7	4.15106	1.93166	2.14895	0.00878513	0.00216042	1.10363	2.66546
HOMER3	35.2107	29	0.669061	1	0.704215	0.0955802	7.36779	0.00108423	0.00217793	2.88123	2.66196
ABCG2	33.8154	27	0.673104	1	0.676308	0.0961578	7.03331	0.00172137	0.00220229	2.8142	2.65713
FLVCR2	63.9354	34	1.4295	3	1.27871	0.204214	6.2616	3.80657e-05	0.00220287	2.64653	2.65701
UBR4	85.7551	47	5.0057	5	1.7151	0.7151	2.39841	0.0351782	0.00220452	1.26208	2.65669
CDC42BPB	216.259	48	16.5562	7	4.32519	2.36517	1.8287	0.00681199	0.00221751	0.870822	2.65413
DMXL1	99.7571	48	6.7615	6	1.99514	0.965928	2.06552	0.0165396	0.00223061	1.0465	2.65158
EIF4G1	20.7352	36	0.503552	1	0.414705	0.0719359	5.76492	0.0368566	0.0022447	2.5273	2.64884
SFMBT2	878.079	43	23.4924	7	17.5616	3.35606	5.23279	4.57774e-06	0.0022712	2.38758	2.64374
SH3YL1	62.3986	32	1.41879	2	1.24797	0.202684	6.15723	0.000188962	0.00227427	2.62228	2.64316
AHR	171.616	45	3.94144	1	3.43232	0.563063	6.0958	0.0103942	0.00228936	2.60782	2.64029
RHPN2	97.4358	45	4.09486	3	1.94872	0.58498	3.33125	0.0170029	0.00229955	1.73606	2.63836
TASP1	333.465	50	21.3018	7	6.66931	3.04312	2.1916	0.0123836	0.0023128	1.13199	2.63586
MVB12B	67.309	41	2.70929	3	1.34618	0.387041	3.47813	0.0276418	0.00231536	1.79831	2.63538
CCNE2	14.0171	25	0.286956	1	0.280341	0.0409937	6.83865	0.00218952	0.00234308	2.77371	2.63021
KRT7	29.6097	26	0.604644	1	0.592193	0.0863777	6.85586	0.00211088	0.00236285	2.77734	2.62656
EOGT	14.1259	23	0.251606	1	0.282517	0.0359438	7.85998	0.00055148	0.00236363	2.97453	2.62642
RPS6KA3	71.4833	45	4.85628	6	1.42967	0.693754	2.06077	0.022879	0.00239253	1.04318	2.62114
MYO1D	49.4102	36	1.19626	2	0.988203	0.170894	5.78256	0.000344004	0.00241021	2.53171	2.61794
GRAMD3	13.9761	22	0.286956	1	0.279522	0.0409937	6.81865	0.00217404	0.00243251	2.76949	2.61395
ZNF418	27.5145	33	0.669061	1	0.550289	0.0955802	5.75736	0.0277833	0.00250089	2.52541	2.60191
ZP3	39.8821	37	1.06717	2	0.797643	0.152453	5.23206	0.00329264	0.0025059	2.38738	2.60104
MPP5	439.021	50	24.8373	6	8.78043	3.54818	2.47463	0.0279652	0.00251051	1.30721	2.60024
TOP2A	332.033	50	26.7824	7	6.64065	3.82606	1.73564	0.000995601	0.00251299	0.795465	2.59981
JUP	11.6149	24	0.256886	1	0.232298	0.0366981	6.32998	0.00510909	0.00253188	2.6622	2.59656
RARA	13.5284	21	0.251606	1	0.270567	0.0359438	7.52751	0.000760069	0.0025715	2.91217	2.58981
GLTSCR1L	55.7063	47	3.35534	5	1.11413	0.479334	2.32432	0.048218	0.00258432	1.21681	2.58765
AGAP1	306.572	50	22.549	7	6.13145	3.22128	1.90342	0.00926398	0.00260441	0.928594	2.58429
TMEM184B	87.2034	48	2.86587	2	1.74407	0.40941	4.25995	0.344524	0.00264545	2.09084	2.5775
NUCKS1	48.5426	37	1.65997	2	0.970851	0.237138	4.09403	0.0396222	0.00266742	2.03352	2.57391
ICA1	197.486	45	10.4625	6	3.94973	1.49464	2.64259	0.00303199	0.00268149	1.40195	2.57162
CTD-2135J3.2	12.5634	23	0.256886	1	0.251267	0.0366981	6.84688	0.00182441	0.00275503	2.77545	2.55987
PDXDC1	304.129	48	17.2878	7	6.08259	2.46969	2.4629	0.0356871	0.00276972	1.30036	2.55756
RALB	51.1829	41	2.22963	3	1.02366	0.318518	3.21382	0.0414386	0.00283363	1.68429	2.54766
MED15	69.6813	38	1.48161	2	1.39363	0.211659	6.58431	0.000158744	0.00283595	2.71903	2.5473
AP1S3	89.4365	45	3.41995	3	1.78873	0.488564	3.6612	0.00557853	0.00289035	1.87232	2.53905
IL13RA1	29.4942	28	0.756184	2	0.589884	0.108026	5.46056	0.00106888	0.00291566	2.44905	2.53526
MAPK14	20.7442	26	0.435243	1	0.414884	0.0621776	6.67256	0.00225172	0.00294383	2.73824	2.53109
CSRNP2	37.1818	36	1.23819	2	0.743635	0.176884	4.20408	0.0170015	0.00294807	2.07179	2.53046
NKIRAS1	10.5113	22	0.217621	1	0.210225	0.0310888	6.76209	0.00191488	0.00298838	2.75747	2.52456
EXOC6B	1448.04	50	95.348	7	28.9607	13.6211	2.12616	0.0125005	0.00306028	1.08825	2.51424
HELB	9.68979	20	0.217621	1	0.193796	0.0310888	6.23363	0.0048251	0.00308852	2.64007	2.51025
HERC5	21.7408	24	0.286956	1	0.434815	0.0409937	10.6069	4.07976e-05	0.00316043	3.40693	2.50025
BIVM-ERCC5	10.2044	18	0.217621	1	0.204087	0.0310888	6.56466	0.00244217	0.00322564	2.71472	2.49138
ATP9A	303.944	49	11.8466	5	6.07889	1.69237	3.59194	0.0430709	0.00322947	1.84476	2.49087
EIF2AK1	72.6451	45	4.29761	5	1.4529	0.613944	2.36651	0.00586824	0.00327511	1.24276	2.48477
ACYP2	55.0605	38	2.85893	4	1.10121	0.408418	2.69628	0.0152652	0.00327677	1.43097	2.48455
STAU1	116.321	49	8.15036	7	2.32642	1.16434	1.99806	0.0028118	0.00327895	0.998603	2.48426
MYO6	78.7966	43	3.16922	3	1.57593	0.452746	3.48083	0.00741378	0.00328278	1.79943	2.48376
PCBD2	10.357	22	0.251606	1	0.20714	0.0359438	5.76288	0.0144991	0.00330801	2.52679	2.48043
PPP1R12C	42.2029	34	1.23862	2	0.844057	0.176945	4.77017	0.00154733	0.00332531	2.25404	2.47817
SYNE1	96.6611	41	3.58564	3	1.93322	0.512234	3.7741	0.00370133	0.00336448	1.91613	2.47308
NPEPPS	495.731	50	38.1139	7	9.91462	5.44484	1.82092	0.00726875	0.00340578	0.864667	2.46778
CDKL4	24.8264	30	0.721173	2	0.496528	0.103025	4.8195	0.003248	0.00347888	2.26888	2.45856
CWF19L2	320.021	50	19.1576	5	6.40043	2.7368	2.33866	0.0306265	0.00348104	1.22568	2.45829
HGS	87.3746	45	3.71725	4	1.74749	0.531036	3.29072	0.0334805	0.00348654	1.71841	2.4576
MCTP2	592.636	45	17.3688	4	11.8527	2.48125	4.77691	0.000360475	0.00350968	2.25608	2.45473
DDX58	12.0119	24	0.256886	1	0.240237	0.0366981	6.54632	0.0022737	0.00353433	2.71068	2.45169
EML1	26.8574	28	0.652051	1	0.537147	0.0931501	5.76647	0.0124426	0.00356621	2.52769	2.44779
CREB5	48.6955	23	0.217621	1	0.973909	0.0310888	31.3267	2.98886e-08	0.00359812	4.96932	2.44392
LRP11	203.433	50	13.4926	7	4.06866	1.92751	2.11084	0.00927996	0.00366964	1.07782	2.43538
ALDH5A1	10.6862	21	0.251606	1	0.213724	0.0359438	5.94607	0.00725067	0.00367985	2.57194	2.43417
MPP1	22.4508	29	0.503552	1	0.449015	0.0719359	6.24188	0.00367223	0.00376811	2.64198	2.42388
ERO1A	26.5388	33	0.669061	1	0.530775	0.0955802	5.55319	0.022104	0.00384513	2.47332	2.41509
STARD10	37.5475	29	0.669061	1	0.750951	0.0955802	7.85676	0.000359844	0.00389038	2.97394	2.41001
MTHFD2	23.1997	29	0.760438	2	0.463993	0.108634	4.27116	0.0117072	0.00390847	2.09463	2.40799
RP11-206L10.8	150.459	49	11.5976	7	3.00918	1.6568	1.81626	0.0252067	0.00391311	0.860968	2.40748
CDKAL1	240.078	50	12.6906	6	4.80157	1.81294	2.6485	0.0316513	0.00391493	1.40517	2.40728
RP11-327J17.3	18.4724	22	0.469228	2	0.369448	0.0670325	5.51148	0.000317916	0.0039307	2.46244	2.40553
RBM25	68.0357	47	4.99637	6	1.36071	0.713767	1.90639	0.0331807	0.00399366	0.93084	2.39863
NAXD	92.0169	42	5.05615	5	1.84034	0.722307	2.54786	0.010302	0.00400697	1.34929	2.39718
SRBD1	579.361	50	45.3489	7	11.5872	6.47842	1.78859	0.0375968	0.00402075	0.838821	2.39569
FBXW10	15.2721	21	0.256886	1	0.305442	0.0366981	8.32311	0.000215801	0.00402824	3.05712	2.39488
NEO1	20.0379	26	0.503213	1	0.400759	0.0718875	5.5748	0.0179283	0.00407066	2.47892	2.39034
GTF2A1	35.6345	38	1.25081	2	0.712689	0.178687	3.98848	0.0469938	0.00409857	1.99584	2.38737
PDCD4	30.9423	34	1.09728	2	0.618845	0.156755	3.94786	0.0189285	0.00410974	1.98107	2.38619
STRN3	725.099	50	42.7968	7	14.502	6.11383	2.37199	0.0125074	0.00425015	1.2461	2.3716
ZNF462	86.6605	39	3.28976	4	1.73321	0.469965	3.68795	0.00852902	0.00425597	1.88282	2.371
RP11-419C5.1	65.3817	44	3.08558	4	1.30763	0.440797	2.96652	0.0308186	0.00438267	1.56877	2.35826
CHUK	9.59035	18	0.217621	1	0.191807	0.0310888	6.16965	0.00349465	0.00438311	2.62519	2.35822
C19orf47	38.6233	37	1.68747	3	0.772466	0.241068	3.20435	0.0127834	0.0044005	1.68003	2.3565
PRR14L	105.737	50	6.15356	5	2.11474	0.87908	2.40562	0.0372075	0.0044149	1.26641	2.35508
C12orf49	11.63	24	0.256886	1	0.232601	0.0366981	6.33823	0.00251243	0.00443587	2.66408	2.35302
APLF	294.74	49	18.7277	7	5.8948	2.67539	2.20334	0.026434	0.0044465	1.13969	2.35198
GPLD1	19.6202	22	0.286956	1	0.392403	0.0409937	9.57228	6.65926e-05	0.00446356	3.25886	2.35032
C15orf41	54.9863	38	2.80464	4	1.09973	0.400663	2.74477	0.0184645	0.00446731	1.45668	2.34995
MAP7D1	25.3208	31	0.86153	2	0.506416	0.123076	4.11467	0.0345802	0.00451332	2.04078	2.3455
MYH9	152.714	45	6.46354	4	3.05427	0.923363	3.30777	0.00180034	0.00453741	1.72586	2.34319
ANAPC1	54.2592	48	13.447	7	1.08518	1.921	0.564905	0.924142	0.00454096	-0.823919	2.34285
COMMD1	58.2598	41	3.27372	5	1.1652	0.467674	2.49147	0.00684981	0.00456609	1.317	2.34046
CDS2	14.433	22	0.469228	2	0.288661	0.0670325	4.30628	0.00361563	0.00472771	2.10644	2.32535
NRG4	9.82267	17	0.217621	1	0.196453	0.0310888	6.31911	0.00240578	0.00473459	2.65972	2.32472
HEXA	9.08348	18	0.217621	1	0.18167	0.0310888	5.84358	0.00631458	0.00475495	2.54685	2.32285
NANS	51.6671	40	2.91679	5	1.03334	0.416685	2.47991	0.0124224	0.00483367	1.31029	2.31572
STX16-NPEPL1	16.4606	26	0.388474	1	0.329211	0.0554963	5.93213	0.00487622	0.00494103	2.56855	2.30618
SLC25A43	119.556	45	8.08304	7	2.39113	1.15472	2.07074	0.001426	0.00494918	1.05015	2.30547
SKI	17.0095	22	0.508493	2	0.34019	0.0726418	4.68312	0.00121269	0.00499203	2.22747	2.30172
CARF	110.569	50	7.10415	5	2.21138	1.01488	2.17896	0.0357233	0.00501276	1.12364	2.29992
UBAP2L	286.227	50	18.856	6	5.72455	2.69371	2.12515	0.0186042	0.00502272	1.08757	2.29906
PPP2R3C	42.5406	40	1.23069	2	0.850813	0.175813	4.8393	0.00092886	0.00503794	2.2748	2.29775
PLOD2	1009.53	49	54.9482	7	20.1906	7.84974	2.57214	0.00268938	0.00514798	1.36297	2.28836
MBP	145.736	46	4.3761	3	2.91473	0.625157	4.66239	0.000391845	0.00515498	2.22107	2.28777
NEMF	210.95	50	10.7683	6	4.219	1.53833	2.74259	0.291284	0.00519475	1.45554	2.28444
IFT81	102.937	48	6.66764	7	2.05874	0.95252	2.16136	0.0096976	0.00525579	1.11194	2.27936
TOR1AIP1	17.8251	27	0.474508	1	0.356501	0.0677868	5.25915	0.0340267	0.00530265	2.39483	2.27551
ELMO2	15.9809	26	0.388474	1	0.319618	0.0554963	5.75926	0.00655238	0.00530583	2.52588	2.27525
MYLK	28.2874	29	0.929991	2	0.565747	0.132856	4.25836	0.0151397	0.00532045	2.0903	2.27405
LEMD3	19.9168	27	0.503552	1	0.398336	0.0719359	5.53737	0.0117928	0.00534191	2.4692	2.2723
YIPF1	11.0892	19	0.256886	1	0.221783	0.0366981	6.04346	0.00332847	0.00552158	2.59538	2.25794
ORC2	119.58	50	6.24729	5	2.3916	0.89247	2.67976	0.0864494	0.00554534	1.4221	2.25607
CLIP4	311.384	49	19.6892	7	6.22767	2.81274	2.21409	0.00187402	0.00559294	1.14672	2.25236
NCOA3	296.311	49	19.8488	7	5.92621	2.83554	2.08997	0.0349989	0.00569623	1.06348	2.24441
VPS39	12.5175	22	0.256886	1	0.25035	0.0366981	6.82187	0.000882288	0.00575683	2.77017	2.23982
RNF169	262.442	50	13.7158	6	5.24884	1.95941	2.67879	0.0762047	0.00589657	1.42158	2.2294
PRMT9	21.1099	33	0.760438	2	0.422197	0.108634	3.88642	0.0369173	0.00592662	1.95844	2.22719
MAP7D3	59.8435	40	3.0913	4	1.19687	0.441614	2.71021	0.00997337	0.0059426	1.43841	2.22602
PDGFRL	12.0914	19	0.251606	1	0.241829	0.0359438	6.72797	0.000948101	0.00609861	2.75017	2.21477
NUP88	47.4597	45	12.7726	6	0.949194	1.82465	0.520205	0.0984704	0.00610157	-0.942849	2.21456
NIPAL3	8.77395	18	0.217621	1	0.175479	0.0310888	5.64445	0.00673873	0.00624801	2.49683	2.20426
UBE2G1	502.711	50	44.8657	7	10.0542	6.40939	1.56867	0.0330519	0.00637511	0.649543	2.19551
PLEKHG2	15.8921	27	0.504577	2	0.317843	0.0720825	4.40943	0.00201899	0.0064005	2.14059	2.19379
ANO5	32.0415	18	0.583509	1	0.640829	0.0833584	7.68763	0.000271371	0.0064804	2.94254	2.1884
GPBP1L1	257.841	50	14.087	5	5.15683	2.01243	2.56249	0.393853	0.00654336	1.35755	2.1842
MICU1	43.37	38	2.25166	4	0.8674	0.321666	2.69659	0.0189966	0.00663144	1.43113	2.17839
RPTOR	147.705	50	6.47174	4	2.9541	0.924535	3.19523	0.24114	0.00669178	1.67592	2.17446
AGO4	53.8341	40	3.59173	6	1.07668	0.513104	2.09837	0.000637177	0.00672692	1.06927	2.17218
ATF2	139.04	48	10.1403	6	2.78081	1.44861	1.91964	0.0263208	0.00674402	0.940836	2.17108
ATP11A	39.8986	38	1.74768	3	0.797973	0.249669	3.19613	0.00924975	0.00682086	1.67632	2.16616
GMEB1	61.0201	48	3.57524	5	1.2204	0.510749	2.38944	0.0403	0.00683241	1.25667	2.16543
AC004076.9	75.1981	33	2.74394	3	1.50396	0.391991	3.83673	0.0141727	0.00684646	1.93988	2.16453
AKAP8L	8.68143	19	0.217621	1	0.173629	0.0310888	5.58493	0.00656488	0.0069733	2.48154	2.15656
OMA1	295.51	50	22.1703	6	5.9102	3.16718	1.86607	0.0342948	0.00699574	0.900006	2.15517
TBC1D9B	13.7751	23	0.469228	2	0.275502	0.0670325	4.10998	0.00394251	0.00704231	2.03913	2.15228
PIK3C2B	25.8303	32	0.962386	2	0.516607	0.137484	3.75759	0.0235332	0.00708314	1.90981	2.14977
SCNM1	165.552	50	8.65667	5	3.31104	1.23667	2.67739	0.00801042	0.00720847	1.42083	2.14216
HPCAL1	255.821	50	18.2551	6	5.11642	2.60787	1.96191	0.0169346	0.00735795	0.972259	2.13324
ZFAND1	17.4558	19	0.400444	1	0.349117	0.0572064	6.10276	0.00205014	0.00741032	2.60946	2.13016
GCFC2	68.0128	45	3.92527	5	1.36026	0.560753	2.42576	0.00985657	0.00742551	1.27844	2.12927
RALGAPA1	228.057	49	11.2833	7	4.56114	1.61189	2.82968	3.03611e-05	0.00744577	1.50064	2.12809
C2CD3	135.792	49	11.0142	7	2.71585	1.57346	1.72603	0.0346095	0.00747565	0.78746	2.12635
RP11-640M9.1	64.3515	32	2.13191	3	1.28703	0.304559	4.22588	0.00203853	0.00755044	2.07925	2.12203
SLC25A36	15.9891	24	0.435243	1	0.319781	0.0621776	5.14304	0.0203212	0.00779867	2.36262	2.10798
MAGI3	152.336	47	7.15669	5	3.04672	1.02238	2.98002	0.0238939	0.00784103	1.57532	2.10563
ARMC4	21.0993	20	0.543842	2	0.421985	0.0776917	5.43153	0.000189488	0.00787591	2.44136	2.1037
KIAA1191	38.2967	22	0.645361	1	0.765934	0.0921944	8.30782	0.000120298	0.00789321	3.05447	2.10275
NUDT5	8.21477	20	0.217621	1	0.164295	0.0310888	5.28472	0.0121566	0.00789477	2.40183	2.10266
HDAC5	22.7233	33	0.791533	2	0.454466	0.113076	4.01912	0.0202045	0.00800733	2.00688	2.09651
SHC1	9.96196	20	0.217621	1	0.199239	0.0310888	6.40872	0.00111463	0.00808437	2.68004	2.09235
BZW2	245.305	50	13.479	6	4.90611	1.92557	2.54788	0.00746715	0.00812829	1.3493	2.09
RSU1	53.3858	37	3.24168	5	1.06772	0.463098	2.30559	0.00295144	0.00816161	1.20514	2.08822
CLOCK	76.9118	47	4.01935	4	1.53824	0.574193	2.67895	0.0390592	0.00817831	1.42167	2.08734
ARCN1	157.265	50	8.69378	7	3.1453	1.24197	2.53251	0.0225436	0.00821499	1.34057	2.08539
INTS9	46.7355	40	2.51503	4	0.93471	0.359291	2.60154	0.0103816	0.0082187	1.37937	2.0852
CCDC9	268.608	49	24.4069	7	5.37216	3.4867	1.54076	0.0104272	0.00823552	0.623638	2.08431
PI4KA	31.3606	36	1.17864	2	0.627213	0.168378	3.72504	0.0499801	0.00825152	1.89726	2.08347
DDAH1	77.6649	42	2.56486	2	1.5533	0.366409	4.23925	0.0393695	0.00831532	2.08381	2.08012
PDXK	70.1406	43	4.66383	6	1.40281	0.666261	2.1055	0.0184472	0.00837072	1.07416	2.07724
FGGY	347.639	49	26.8034	7	6.95277	3.82906	1.81579	0.00358727	0.00851007	0.860597	2.07007
ATF6B	9.32019	23	0.256886	1	0.186404	0.0366981	5.07939	0.020598	0.00859293	2.34466	2.06586
ZDBF2	450	46	24.5457	6	8.99999	3.50653	2.56664	0.00107559	0.00859653	1.35988	2.06568
PPP2R5E	17.2175	26	0.618066	2	0.34435	0.0882951	3.89999	0.0108856	0.00896658	1.96347	2.04737
SLC16A3	16.2025	22	0.435243	1	0.324051	0.0621776	5.2117	0.0114318	0.00914823	2.38175	2.03866
RASEF	25.5715	28	0.731394	1	0.511429	0.104485	4.89476	0.0392325	0.00915573	2.29124	2.03831
NLRP2	16.3392	16	0.251606	1	0.326783	0.0359438	9.09151	5.19097e-05	0.00927435	3.18452	2.03272
UBAC1	8.67201	19	0.217621	1	0.17344	0.0310888	5.57887	0.0042382	0.00934794	2.47997	2.02928
VPS45	37.4069	38	1.74277	3	0.748137	0.248967	3.00497	0.0482113	0.00944902	1.58735	2.02461
ENTPD7	9.45579	20	0.256886	1	0.189116	0.0366981	5.15329	0.0128494	0.00946244	2.36549	2.024
EIF4E3	30.4987	22	0.583509	1	0.609974	0.0833584	7.31748	0.000278728	0.00959279	2.87135	2.01806
RAPGEF5	1046.62	49	32.1429	5	20.9323	4.59184	4.55859	8.83058e-06	0.00959845	2.18859	2.0178
PTCD2	8.01511	21	0.217621	1	0.160302	0.0310888	5.15627	0.0121896	0.00966661	2.36633	2.01473
RRP1B	44.2284	43	11.3412	7	0.884567	1.62017	0.545971	0.60371	0.00975094	-0.873104	2.01095
GBF1	110.373	49	5.33056	5	2.20746	0.761509	2.8988	0.137248	0.00998204	1.53545	2.00078
SUPT20H	77.6057	48	3.43609	4	1.55211	0.49087	3.16197	0.169726	0.010116	1.66082	1.99499
AC005281.1	22.1343	25	0.726114	2	0.442687	0.103731	4.26766	0.00257451	0.0101885	2.09345	1.99189
NTN4	113.834	40	4.49736	2	2.27669	0.642479	3.5436	0.0266577	0.0102687	1.82522	1.98849
CTSC	8.9921	17	0.217621	1	0.179842	0.0310888	5.78479	0.00239652	0.010336	2.53226	1.98565
MFSD8	121.46	47	4.19206	3	2.4292	0.598866	4.05634	0.0520008	0.010344	2.02018	1.98531
DNASE2	13.5302	25	0.543842	2	0.270604	0.0776917	3.48305	0.0345988	0.0104354	1.80035	1.98149
RP11-385D13.1	28.7821	31	0.815565	1	0.575642	0.116509	4.94074	0.0214409	0.010557	2.30473	1.97646
PRUNE	154.15	46	6.8332	5	3.08301	0.976171	3.15827	0.00351363	0.0105989	1.65913	1.97474
RRP36	43.3367	38	2.39255	4	0.866734	0.341792	2.53585	0.0225905	0.0107763	1.34247	1.96753
TLL1	34.3128	22	0.388474	1	0.686255	0.0554963	12.3658	5.07124e-06	0.0108084	3.62828	1.96624
ZDHHC21	160.521	49	12.3784	7	3.21042	1.76835	1.81549	0.00806832	0.0108095	0.86036	1.96619
GNS	14.28	20	0.504577	2	0.2856	0.0720825	3.96212	0.00377541	0.0108633	1.98627	1.96404
REPS2	44.0826	37	1.42691	2	0.881653	0.203844	4.32513	0.0170755	0.0109346	2.11274	1.9612
DPY19L1	532.263	50	23.7319	6	10.6453	3.39027	3.13995	0.410215	0.0109383	1.65074	1.96105
PDCD11	354.178	50	33.4657	7	7.08357	4.78081	1.48167	0.0261867	0.0110485	0.567221	1.9567
KIRREL	10.3241	17	0.256886	1	0.206483	0.0366981	5.62654	0.0029657	0.011122	2.49225	1.95382
ITGAV	48.6804	44	2.7788	4	0.973609	0.396972	2.45259	0.0148027	0.0111339	1.2943	1.95335
SLC25A26	133.832	43	8.76804	6	2.67664	1.25258	2.13691	0.0120613	0.0111652	1.09553	1.95213
CEP55	22.8692	37	6.54712	6	0.457385	0.935302	0.489024	0.13123	0.0112928	-1.03202	1.9472
APPL1	108.268	46	3.39311	2	2.16535	0.48473	4.46714	0.198175	0.0113074	2.15935	1.94664
SVIL	116.436	44	4.12824	3	2.32872	0.589748	3.94867	0.00711613	0.0113367	1.98137	1.94551
ADRBK1	19.641	30	0.721173	2	0.39282	0.103025	3.81287	0.0173655	0.0114496	1.93088	1.94121
ZNF398	216.108	49	16.6825	7	4.32217	2.38321	1.81359	0.0119177	0.0114509	0.858849	1.94116
RP13-279N23.2	49.5519	29	1.31021	1	0.991038	0.187173	5.29477	0.00602895	0.0114708	2.40457	1.94041
TRIQK	10.4135	20	0.256886	1	0.208271	0.0366981	5.67525	0.00256266	0.0114987	2.50468	1.93935
KIAA1841	207.425	49	14.2626	6	4.1485	2.03752	2.03606	0.0482457	0.011516	1.02578	1.9387
PIWIL4	13.8356	20	0.256886	1	0.276713	0.0366981	7.54025	0.000179885	0.0115175	2.91461	1.93864
RP11-1023L17.1	29.7054	35	1.16413	2	0.594108	0.166304	3.57243	0.041276	0.0115848	1.8369	1.93611
STX2	26.4661	31	1.26893	3	0.529323	0.181276	2.91998	0.0292654	0.0115976	1.54596	1.93563
CFDP1	39.5664	38	2.28559	4	0.791327	0.326513	2.42357	0.0338324	0.0116464	1.27714	1.93381
CDYL2	298.641	38	8.51024	3	5.97282	1.21575	4.91288	6.91002e-05	0.0116885	2.29657	1.93224
SDE2	8.34099	18	0.217621	1	0.16682	0.0310888	5.36591	0.00490323	0.0116889	2.42382	1.93223
LRRC41	9.03896	19	0.217621	1	0.180779	0.0310888	5.81493	0.00188301	0.0118455	2.53976	1.92645
ZNF510	12.4321	18	0.251606	1	0.248642	0.0359438	6.91753	0.000358882	0.0118735	2.79026	1.92542
TYMS	17.3433	25	5.92851	6	0.346865	0.84693	0.409556	0.280546	0.0118807	-1.28787	1.92516
FOXK2	668.576	50	63.807	7	13.3715	9.11528	1.46693	0.0183872	0.0119141	0.552805	1.92394
MYH14	25.261	24	0.669061	1	0.50522	0.0955802	5.28582	0.00578441	0.0119155	2.40213	1.92389
LRGUK	10.1647	17	0.251606	1	0.203294	0.0359438	5.6559	0.00253032	0.0119238	2.49976	1.92359
MKRN1	10.587	18	0.256886	1	0.21174	0.0366981	5.76978	0.00201687	0.0119804	2.52852	1.92153
GFPT2	32.1106	27	1.16088	3	0.642211	0.16584	3.87247	0.000429293	0.0121293	1.95325	1.91616
CCDC40	185.489	46	10.9096	6	3.70978	1.55852	2.38032	0.00516741	0.0122371	1.25116	1.91232
TRABD	10.0522	18	0.256886	1	0.201044	0.0366981	5.47832	0.00352749	0.0122411	2.45373	1.91218
ADGRL3	24.6235	16	0.504577	2	0.49247	0.0720825	6.83204	2.10391e-05	0.0122775	2.77232	1.91089
EPS15	362.7	50	19.5522	6	7.25401	2.79318	2.59704	0.141523	0.0124554	1.37687	1.90464
SPPL3	397.141	49	25.9528	7	7.94281	3.70754	2.14234	0.0922545	0.0127786	1.09919	1.89352
WIPF2	9.35727	16	3.88501	5	0.187145	0.555002	0.337197	0.232299	0.0127942	-1.56833	1.89299
VDAC2	14.7526	26	0.435243	1	0.295052	0.0621776	4.74531	0.0289232	0.0128749	2.2465	1.89026
TMEM56	154.05	47	8.48315	4	3.081	1.21188	2.54233	0.0334956	0.0129494	1.34615	1.88775
LRRC27	8.94728	20	0.251606	1	0.178946	0.0359438	4.97849	0.0118403	0.0129504	2.31571	1.88772
CCDC102A	9.39365	17	0.217621	1	0.187873	0.0310888	6.04312	0.00111281	0.0130861	2.59529	1.88319
MYO1E	261.937	48	14.9489	6	5.23873	2.13556	2.45309	0.028158	0.0131408	1.2946	1.88138
CNTLN	176.661	43	48.9247	7	3.53322	6.98924	0.505524	0.610987	0.0131505	-0.98415	1.88106
GARS	162.093	49	14.5833	7	3.24187	2.08333	1.5561	0.000991367	0.0131735	0.637935	1.8803
GOLM1	110.387	48	6.65701	5	2.20774	0.951002	2.32149	0.0287472	0.0132258	1.21505	1.87858
CEACAM16	38.5141	27	0.86153	2	0.770282	0.123076	6.2586	6.95607e-05	0.0132584	2.64584	1.87751
MMS22L	23.1249	31	7.19288	6	0.462497	1.02755	0.450096	0.454619	0.0132952	-1.1517	1.87631
CCNYL1	125.165	49	9.03185	6	2.5033	1.29026	1.94015	0.0270189	0.0134135	0.956166	1.87246
HSP90B1	140.752	44	5.01118	3	2.81505	0.715883	3.93227	0.226553	0.0136355	1.97536	1.86533
PRKCH	28.22	22	0.971983	2	0.5644	0.138855	4.06468	0.00220691	0.0138138	2.02314	1.85969
MROH7-TTC4	9.94631	20	0.256886	1	0.198926	0.0366981	5.42062	0.00332578	0.0138212	2.43846	1.85946
TGIF2-C20orf24	92.7101	46	6.52073	6	1.8542	0.931532	1.99049	0.00776208	0.0139431	0.99312	1.85564
CTD-2116N17.1	19.589	25	6.88864	5	0.391781	0.984091	0.398114	0.202023	0.0139578	-1.32874	1.85518
KDM4A	10.4802	19	0.286956	1	0.209604	0.0409937	5.11308	0.00677874	0.0140925	2.35419	1.85101
PPP6R3	787.376	50	67.938	7	15.7475	9.70542	1.62255	0.0259729	0.0143725	0.698261	1.84247
OTUD7B	62.1932	46	3.82463	5	1.24386	0.546375	2.27658	0.00639168	0.0144302	1.18687	1.84073
CARHSP1	47.9213	39	2.02017	3	0.958427	0.288596	3.321	0.00284382	0.0144491	1.73162	1.84016
MAP3K13	92.2329	44	3.80236	3	1.84466	0.543194	3.39595	0.00415203	0.0147813	1.76381	1.83029
TANGO2	17.0475	25	0.503213	1	0.340949	0.0718875	4.74282	0.0201232	0.0148109	2.24574	1.82942
OAS3	9.13438	17	0.251606	1	0.182688	0.0359438	5.08259	0.00670597	0.0148375	2.34557	1.82864
MOCOS	210.403	46	11.231	6	4.20806	1.60442	2.62278	0.00989176	0.0150343	1.3911	1.82292
PLCH1	31.0768	31	1.46361	3	0.621535	0.209087	2.97261	0.013304	0.0150443	1.57173	1.82263
CPS1	139.879	20	1.63113	1	2.79757	0.233018	12.0058	4.48781e-06	0.0152031	3.58566	1.81807
RUVBL2	7.33888	15	2.96442	5	0.146778	0.423489	0.346592	0.512356	0.0152181	-1.52869	1.81764
C17orf67	9.75202	18	0.251606	1	0.19504	0.0359438	5.42626	0.00281544	0.0152923	2.43996	1.81553
PRKACB	83.71	40	4.26253	5	1.6742	0.608932	2.7494	0.00093453	0.0153916	1.45912	1.81272
MTMR3	156.051	48	8.05276	5	3.12102	1.15039	2.713	0.149699	0.0154181	1.43989	1.81197
ANO6	132.116	46	7.8164	6	2.64232	1.11663	2.36634	0.00069268	0.015772	1.24266	1.80211
MCMDC2	10.8206	17	0.286956	1	0.216412	0.0409937	5.27916	0.00369377	0.015812	2.40031	1.80101
PPAT	7.54321	19	0.217621	1	0.150864	0.0310888	4.85269	0.0115244	0.0159213	2.27878	1.79802
ANKIB1	1056.76	50	70.2964	7	21.1352	10.0423	2.10461	0.206052	0.0160839	1.07355	1.79361
RP11-435I10.4	53.1731	42	3.03289	4	1.06346	0.433271	2.4545	0.00685639	0.0160891	1.29543	1.79347
KAT2B	9.4065	20	0.251606	1	0.18813	0.0359438	5.23401	0.00394306	0.0161978	2.38792	1.79054
AC018633.4	327.827	50	30.5146	7	6.55654	4.35922	1.50406	0.00150533	0.0162064	0.588864	1.79031
GBAS	158.409	49	7.42577	6	3.16817	1.06082	2.98652	0.0622296	0.0162241	1.57847	1.78984
PIAS2	48.9374	43	14.1636	6	0.978748	2.02338	0.483721	0.631197	0.0162332	-1.04775	1.7896
SARS	27.4447	32	1.33867	3	0.548895	0.191238	2.87022	0.0218533	0.0163581	1.52116	1.78627
KDM5B	180.378	49	10.4204	5	3.60755	1.48863	2.4234	0.316237	0.0164115	1.27703	1.78485
CFLAR	280.796	50	16.6307	6	5.61592	2.37581	2.36379	0.0225161	0.0165071	1.2411	1.78233
PIK3R3	226.964	47	10.9706	3	4.53928	1.56723	2.89638	0.0183879	0.016539	1.53425	1.78149
MBIP	15.1275	16	0.251606	1	0.30255	0.0359438	8.4173	5.17772e-05	0.0165949	3.07336	1.78003
MGST2	17.2559	22	0.513773	1	0.345117	0.0733961	4.70212	0.0173725	0.0167481	2.23331	1.77604
DCAF13	35.8725	32	11.1838	7	0.71745	1.59769	0.449055	0.279788	0.0167749	-1.15504	1.77534
PBX1	29.0089	29	0.893051	2	0.580178	0.127579	4.5476	0.000778716	0.016884	2.18511	1.77253
EPB41L4A	81.637	30	0.655106	1	1.63274	0.0935866	17.4463	3.36951e-07	0.0169895	4.12485	1.76982
BBS2	10.0158	16	0.251606	1	0.200316	0.0359438	5.57304	0.00179363	0.016992	2.47846	1.76976
SRFBP1	60.0285	35	2.07101	2	1.20057	0.295858	4.05792	0.0497504	0.0170564	2.02074	1.76811
FGFR2	68.0083	21	0.655106	1	1.36017	0.0935866	14.5338	1.10498e-06	0.0171167	3.86134	1.76658
ZNF706	20.5714	24	0.538562	1	0.411429	0.0769374	5.34757	0.0027939	0.0171398	2.41888	1.76599
TRAM1	58.038	42	3.29099	4	1.16076	0.470141	2.46896	0.0145195	0.0172192	1.3039	1.76399
PTPN1	10.5047	19	0.286956	1	0.210094	0.0409937	5.12505	0.00460214	0.017265	2.35757	1.76283
CYP24A1	14340.3	50	146.616	6	286.807	20.9451	13.6933	1.62002e-07	0.0174574	3.7754	1.75802
ATP6V0D1	7.38863	19	0.217621	1	0.147773	0.0310888	4.75324	0.0131263	0.0174597	2.24891	1.75796
COG1	20.9755	28	0.840396	2	0.419511	0.120057	3.49428	0.0351972	0.0174695	1.80499	1.75772
NEIL3	765.889	50	61.9788	7	15.3178	8.85411	1.73002	0.000609117	0.0175243	0.790787	1.75636
TERT	35.2779	30	1.4752	3	0.705557	0.210742	3.34796	0.00100225	0.0176594	1.74328	1.75302
SUDS3	13.2747	23	0.543842	2	0.265494	0.0776917	3.41727	0.013435	0.017719	1.77284	1.75156
NINL	33.5749	38	1.75635	3	0.671498	0.250908	2.67627	0.0441365	0.0177445	1.42022	1.75094
HHAT	20.8075	20	0.251606	1	0.416149	0.0359438	11.5778	4.89906e-06	0.0178289	3.53329	1.74888
VAV2	37.7125	37	2.463	5	0.754251	0.351857	2.14363	0.00892163	0.0179035	1.10005	1.74706
SEMA4B	256.839	49	12.6929	5	5.13678	1.81327	2.83289	0.618816	0.0179878	1.50227	1.74502
LRRC6	122.54	36	4.61372	3	2.45079	0.659104	3.71837	0.0103446	0.0181845	1.89467	1.7403
DTNB	103.195	49	7.17073	6	2.06391	1.02439	2.01477	0.0125242	0.0182181	1.01061	1.7395
PSMD14	156.114	49	12.2629	6	3.12228	1.75184	1.78229	0.0325388	0.0182208	0.833728	1.73943
DYNC1LI2	47.6199	45	11.9548	6	0.952398	1.70783	0.557667	0.0827972	0.01823	-0.842525	1.73921
SNX27	522.551	50	36.1614	7	10.451	5.16592	2.02307	0.00401294	0.0183152	1.01655	1.73719
CUX1	332.484	50	26.322	7	6.64968	3.76029	1.7684	0.0229323	0.0183709	0.822442	1.73587
CNKSR2	10.0922	14	0.251606	1	0.201843	0.0359438	5.61552	0.00147609	0.0184083	2.48942	1.73499
CH17-258A22.4	7.65249	18	0.217621	1	0.15305	0.0310888	4.92299	0.00685769	0.0185643	2.29954	1.73132
NAA15	78.1257	48	3.93104	3	1.56251	0.561577	2.78237	0.51655	0.0186312	1.47631	1.72976
CNOT6L	186.132	50	15.7473	7	3.72265	2.24962	1.65479	0.028029	0.0186345	0.726649	1.72968
GALC	4.87353	11	2.40823	4	0.0974706	0.344033	0.283318	0.159702	0.0187755	-1.81951	1.72641
HNRNPD	22.7072	27	0.721173	2	0.454144	0.103025	4.40811	0.00106344	0.0188855	2.14016	1.72387
MUC16	202.403	39	5.93782	1	4.04806	0.84826	4.77219	0.0103444	0.0189247	2.25465	1.72297
RSBN1	14.7812	25	0.435243	1	0.295623	0.0621776	4.7545	0.0107892	0.0190555	2.24929	1.71998
INPP4A	14.0601	22	0.400444	1	0.281201	0.0572064	4.91556	0.00646204	0.0193631	2.29736	1.71303
FAM193B	30.4176	29	1.29204	2	0.608352	0.184578	3.29591	0.0221321	0.0193773	1.72068	1.71271
RPS6KC1	426.18	50	39.6044	7	8.52359	5.65777	1.50653	0.0103214	0.0195666	0.591228	1.70848
NR2C1	32.2788	37	1.91484	4	0.645577	0.273549	2.36001	0.0377259	0.0196379	1.23879	1.7069
ABLIM1	56.0897	35	2.0593	3	1.12179	0.294185	3.81323	0.00202532	0.0196723	1.93101	1.70615
RIC8B	106.237	46	8.51435	6	2.12473	1.21634	1.74683	0.0235604	0.0197508	0.804738	1.70441
SNX8	59.8224	43	4.01893	5	1.19645	0.574133	2.08392	0.0347626	0.0199567	1.0593	1.69991
TADA2A	286.084	50	16.0423	7	5.72168	2.29175	2.49664	0.0549538	0.0199998	1.31999	1.69898
STX3	9.11061	20	0.286956	1	0.182212	0.0409937	4.44489	0.0307327	0.0202276	2.15215	1.69406
DIP2B	93.8451	45	5.44876	4	1.8769	0.778394	2.41125	0.0110727	0.0202581	1.26978	1.6934
TNFRSF11A	96.4515	35	1.33812	1	1.92903	0.19116	10.0912	1.1118e-05	0.0203018	3.33502	1.69247
NAPB	104.278	45	5.56745	5	2.08556	0.79535	2.62219	0.00141908	0.0205223	1.39077	1.68777
HELZ	85.5804	47	4.1948	4	1.71161	0.599257	2.85622	0.171442	0.0205702	1.51411	1.68676
SYCP2	19.7619	21	0.721173	2	0.395238	0.103025	3.83634	0.00486707	0.0206309	1.93973	1.68548
GBE1	56.1171	42	3.39922	4	1.12234	0.485603	2.31123	0.0390767	0.0208407	1.20866	1.68109
LANCL2	22.5867	27	0.469228	2	0.451735	0.0670325	6.73904	1.26511e-05	0.0209873	2.75254	1.67804
CELSR1	228.203	47	16.2425	7	4.56406	2.32036	1.96697	0.0298689	0.0210522	0.975972	1.6767
COPG1	54.2097	44	2.68787	4	1.08419	0.383981	2.82356	0.139173	0.0212118	1.49751	1.67342
STAG1	393.571	50	36.8931	7	7.87143	5.27044	1.4935	0.0466359	0.021364	0.578702	1.67032
GRAMD4	55.3256	37	2.9412	4	1.10651	0.420171	2.63348	0.00146717	0.0214461	1.39697	1.66865
ZNF341	11.4079	22	0.469228	2	0.228157	0.0670325	3.40368	0.00963434	0.0214637	1.76709	1.66829
RPS6KB1	110.078	50	7.21638	4	2.20157	1.03091	2.13555	0.594326	0.021779	1.09461	1.66196
MTHFD2L	1017.85	50	79.0854	7	20.3571	11.2979	1.80185	0.0347491	0.0218547	0.849475	1.66046
CDC73	151.965	49	12.3909	6	3.0393	1.77013	1.71699	0.0146055	0.0218549	0.779878	1.66045
PPFIA3	31.0502	30	1.2935	2	0.621004	0.184785	3.36068	0.0112391	0.0219674	1.74875	1.65822
GNA13	8.32115	17	0.256886	1	0.166423	0.0366981	4.53493	0.0164829	0.0221072	2.18108	1.65547
PLEC	49.7211	40	3.07217	4	0.994422	0.438881	2.26581	0.0218884	0.0222005	1.18003	1.65364
MTA3	195.532	50	11.3307	5	3.91064	1.61867	2.41596	0.713045	0.0223942	1.2726	1.64987
MET	992.921	50	26.6586	6	19.8584	3.80837	5.21441	5.21606e-06	0.0226239	2.38251	1.64543
BPTF	322.238	50	28.4486	7	6.44477	4.06408	1.58579	0.021622	0.0227696	0.665199	1.64264
MED23	20.4778	29	0.840396	2	0.409556	0.120057	3.41136	0.0270494	0.0228367	1.77035	1.64137
TK2	15.1774	27	0.64008	2	0.303548	0.0914401	3.31964	0.0184653	0.0228507	1.73103	1.6411
SEMA3C	931.467	49	59.6067	5	18.6293	8.51524	2.18776	0.028038	0.0228569	1.12946	1.64098
TRPC4AP	62.7972	44	2.46136	3	1.25594	0.351623	3.57185	0.101033	0.022952	1.83667	1.63918
FAT3	248.78	28	0.503552	1	4.9756	0.0719359	69.167	4.63656e-11	0.0230449	6.11201	1.63743
RBBP8	316.781	50	27.6377	7	6.33561	3.94825	1.60466	0.0220028	0.0231088	0.682271	1.63622
ERGIC1	61.5189	38	3.99811	6	1.23038	0.571159	2.15418	0.0037501	0.0232005	1.10714	1.6345
P4HA2	8.61801	15	0.251606	1	0.17236	0.0359438	4.79527	0.00636702	0.0232171	2.26161	1.63419
UBE2Q2P2	26.9738	31	1.10835	2	0.539476	0.158335	3.40717	0.0110632	0.0232215	1.76858	1.63411
PIP5K1C	312.721	50	28.5745	7	6.25442	4.08207	1.53217	0.0098318	0.0233639	0.615576	1.63145
PPIL2	8.54597	18	0.251606	1	0.170919	0.0359438	4.75519	0.00695147	0.0235305	2.2495	1.62837
KIAA0319	51.7408	26	1.9115	3	1.03482	0.273072	3.78954	0.000455443	0.0236022	1.92202	1.62705
MAPK1	274.245	49	14.0171	6	5.4849	2.00244	2.7391	0.132762	0.0236701	1.4537	1.6258
DDX43	9.40238	13	0.217621	1	0.188048	0.0310888	6.04873	0.000501531	0.0239067	2.59663	1.62148
BRPF3	85.1317	44	5.58906	5	1.70263	0.798437	2.13246	0.0251114	0.0239385	1.09252	1.6209
PARP8	183.483	48	11.9585	6	3.66966	1.70835	2.14807	0.02496	0.0241056	1.10304	1.61788
ERCC2	25.0353	32	6.92943	6	0.500706	0.989918	0.505805	0.377555	0.024145	-0.983346	1.61717
MED13L	258.056	50	18.6081	6	5.16113	2.6583	1.94151	0.011156	0.0241853	0.957182	1.61645
VMP1	1152.92	50	83.3627	7	23.0585	11.909	1.93623	0.0431234	0.0243013	0.95325	1.61437
IQGAP1	461.545	50	32.9994	7	9.23089	4.71421	1.9581	0.0706093	0.0245106	0.969455	1.61065
TCAF1	9.62447	17	0.286956	1	0.192489	0.0409937	4.69559	0.00738598	0.024887	2.23131	1.60403
TJP1	641.869	50	42.3222	7	12.8374	6.04603	2.12327	0.232149	0.0250021	1.08629	1.60202
PRPF39	64.5449	46	5.70725	7	1.2909	0.815321	1.5833	0.00446325	0.0251873	0.662934	1.59882
NOMO3	8.43582	15	0.217621	1	0.168716	0.0310888	5.42693	0.00129091	0.0255523	2.44014	1.59257
AF127936.7	39.986	24	1.20929	1	0.79972	0.172755	4.6292	0.00849	0.0256365	2.21076	1.59114
TRIM6	37.955	28	1.20133	1	0.759101	0.171619	4.42317	0.0173663	0.0256411	2.14508	1.59106
EAPP	9.96459	16	0.251606	1	0.199292	0.0359438	5.54454	0.00103064	0.0257167	2.47107	1.58978
TRIM16L	42.5794	33	2.81941	5	0.851589	0.402773	2.11431	0.00917803	0.0257408	1.08019	1.58938
DGCR2	25.8648	33	1.11842	2	0.517296	0.159774	3.23768	0.0154091	0.0257807	1.69496	1.58871
TMEM236	9.54014	11	0.217621	1	0.190803	0.0310888	6.13736	0.000393593	0.0259571	2.61762	1.58574
CRKL	1097.01	50	74.78	7	21.9402	10.6829	2.05377	0.011832	0.0261766	1.03828	1.58209
TSG101	31.5455	38	1.90892	4	0.63091	0.272703	2.31354	0.0130628	0.0263753	1.2101	1.5788
CTB-131B5.5	13.5041	21	0.400444	1	0.270082	0.0572064	4.7212	0.00604432	0.0264823	2.23915	1.57704
ARHGEF2	17.4135	23	0.726114	2	0.348269	0.103731	3.35744	0.0149173	0.0268251	1.74736	1.57146
CCDC58	7.76015	15	0.217621	1	0.155203	0.0310888	4.99225	0.00294939	0.0268346	2.31969	1.5713
C10orf11	8.91987	15	0.256886	1	0.178397	0.0366981	4.86122	0.00401756	0.0269623	2.28132	1.56924
PAPOLG	39.1225	44	1.27012	2	0.782449	0.181445	4.31232	0.167209	0.0269727	2.10846	1.56908
TPM1	55.8153	14	1.0071	1	1.11631	0.143872	7.75904	5.38088e-05	0.0274812	2.95588	1.56096
PRCP	29.951	32	1.24934	2	0.59902	0.178477	3.35628	0.0206853	0.0275592	1.74686	1.55973
STK17A	36.604	38	1.8662	3	0.732081	0.2666	2.74599	0.0231551	0.0275923	1.45732	1.55921
LMNB1	160.029	49	36.7791	7	3.20058	5.25416	0.609151	0.141313	0.0278428	-0.715129	1.55529
STK39	1016.54	50	73.4565	7	20.3308	10.4938	1.93741	0.000836395	0.0280184	0.954131	1.55256
ABCA1	26.0938	26	1.12656	2	0.521876	0.160937	3.24274	0.0140614	0.0281726	1.69721	1.55017
SLC4A1AP	43.3166	48	2.56895	4	0.866333	0.366992	2.36063	0.399553	0.0283191	1.23917	1.54792
NUAK1	7.19235	16	0.217621	1	0.143847	0.0310888	4.62698	0.00691526	0.0283309	2.21007	1.54774
ATRN	37.4327	35	2.2009	4	0.748654	0.314414	2.38111	0.0280241	0.02839	1.25163	1.54683
DNAJA2	32.0571	40	9.10067	6	0.641143	1.3001	0.49315	0.120109	0.0286174	-1.0199	1.54337
NLRC5	7.55694	15	0.217621	1	0.151139	0.0310888	4.86152	0.00358825	0.0286512	2.28141	1.54286
ASCC3	340.036	49	33.2329	7	6.80072	4.74756	1.43247	0.00265524	0.028704	0.518501	1.54206
GLI1	10.6198	12	0.286956	1	0.212396	0.0409937	5.18119	0.00172996	0.0288143	2.37328	1.54039
TTC3	491.239	50	30.1353	7	9.82478	4.30504	2.28216	0.0684306	0.0289824	1.1904	1.53787
TEX15	12.2513	20	0.400444	1	0.245026	0.0572064	4.28319	0.0219789	0.029032	2.09869	1.53712
MCM5	26.3022	31	1.17227	2	0.526045	0.167468	3.14117	0.0225534	0.0292802	1.6513	1.53343
RSPO3	27.7909	13	0.400444	1	0.555819	0.0572064	9.71603	9.55425e-06	0.0293229	3.28037	1.53279
PSMD11	33.9177	37	2.10519	4	0.678353	0.300742	2.2556	0.0333286	0.0295368	1.17351	1.52964
PRMT1	9.47771	19	0.256886	1	0.189554	0.0366981	5.16524	0.00171532	0.0295462	2.36883	1.5295
RAB2A	244.909	48	15.9297	6	4.89818	2.27567	2.15241	0.47481	0.02955	1.10596	1.52944
DYNC2LI1	20.0837	27	0.800729	2	0.401674	0.11439	3.51145	0.00530896	0.0295539	1.81207	1.52939
MYBBP1A	9.02897	16	0.251606	1	0.180579	0.0359438	5.02394	0.00230408	0.0296734	2.32882	1.52763
SP100	220.835	49	9.24249	3	4.4167	1.32036	3.34508	0.0786808	0.0296889	1.74204	1.52741
LAMA5	127.592	47	8.42716	5	2.55184	1.20388	2.11968	0.0164362	0.0297738	1.08385	1.52617
BRAP	164.583	50	10.8622	5	3.29166	1.55175	2.12125	0.265907	0.0298988	1.08492	1.52435
DAAM1	12.2484	23	0.400444	1	0.244969	0.0572064	4.28219	0.0202389	0.029933	2.09835	1.52385
IQCK	42.7719	35	2.48447	4	0.855437	0.354925	2.41019	0.0197575	0.0300321	1.26915	1.52241
MTMR14	12.3266	22	4.23218	5	0.246531	0.604598	0.407761	0.16975	0.0301601	-1.2942	1.52057
PTPRM	400.182	43	21.3423	6	8.00365	3.0489	2.62509	0.0147069	0.0302204	1.39237	1.5197
PDE8A	962.34	50	80.9825	7	19.2468	11.5689	1.66366	0.0495095	0.0303813	0.734363	1.51739
KPNA1	97.9221	50	5.66301	5	1.95844	0.809001	2.42081	0.0794024	0.0304591	1.27549	1.51628
DPH6	13.7739	22	0.435243	1	0.275478	0.0621776	4.4305	0.0109245	0.0305738	2.14747	1.51465
MAN1A2	8821.37	50	872.605	7	176.427	124.658	1.41529	0.0355166	0.0305897	0.501101	1.51443
TUSC3	299.368	48	16.851	4	5.98736	2.40728	2.48719	0.00431163	0.0306251	1.31452	1.51392
CC2D2A	11.4857	23	0.508493	2	0.229713	0.0726418	3.16227	0.0142609	0.0308773	1.66096	1.51036
GOLPH3L	39.8621	35	1.85097	3	0.797241	0.264425	3.015	0.00179996	0.0310347	1.59216	1.50815
IKBKB	132.179	47	6.38898	4	2.64358	0.912711	2.89641	0.0782328	0.0311005	1.53426	1.50723
GUCY1A3	13.0481	14	0.251606	1	0.260962	0.0359438	7.26029	7.64995e-05	0.0312307	2.86003	1.50542
CABLES1	19.526	22	0.604644	1	0.39052	0.0863777	4.52108	0.00770455	0.0312932	2.17667	1.50455
FER1L4	46.1668	33	2.46736	4	0.923337	0.35248	2.61954	0.00556564	0.0313545	1.38932	1.5037
TMEM45A	10.3973	14	0.256886	1	0.207946	0.0366981	5.6664	0.000620812	0.0313978	2.50243	1.5031
HECTD1	605.882	50	46.4989	7	12.1176	6.6427	1.8242	0.0365641	0.0314779	0.867267	1.50199
BRD4	15.8366	27	5.15626	5	0.316732	0.736608	0.429988	0.368587	0.0316298	-1.21763	1.4999
TRAPPC9	347.935	50	26.9037	7	6.9587	3.84338	1.81057	0.041464	0.0316975	0.85644	1.49897
TCP11L1	25.9531	31	1.19367	2	0.519062	0.170524	3.04393	0.031136	0.0318742	1.60593	1.49656
MOB3A	10.9413	18	0.251606	1	0.218825	0.0359438	6.08799	0.000312207	0.0322633	2.60597	1.49129
DTNBP1	80.7834	46	5.1571	4	1.61567	0.736729	2.19303	0.03968	0.0323383	1.13292	1.49028
SPIRE1	147.174	49	11.1325	6	2.94349	1.59036	1.85083	0.00824188	0.0323408	0.888173	1.49025
BAIAP2L1	42.7661	38	1.92848	3	0.855322	0.275497	3.10465	0.00707672	0.0324775	1.63443	1.48842
PKHD1	148.677	18	1.16413	2	2.97354	0.166304	17.8802	1.47087e-08	0.0325987	4.16029	1.4868
MPZL1	129.353	48	10.755	7	2.58705	1.53643	1.68381	0.0110176	0.0326484	0.751732	1.48614
GTF2IP1	38.3334	43	1.73751	3	0.766668	0.248216	3.08872	0.169057	0.0328729	1.62701	1.48316
NIPSNAP3A	38.7153	19	1.32821	2	0.774307	0.189744	4.08079	0.000486415	0.0329771	2.02885	1.48179
UBR2	358.252	50	24.3803	6	7.16504	3.48291	2.0572	0.20905	0.033144	1.04068	1.47959
ARHGEF12	430.693	50	28.4136	6	8.61386	4.05909	2.12212	0.466668	0.033153	1.0855	1.47948
ZDHHC2	8.73264	14	0.217621	1	0.174653	0.0310888	5.61787	0.000614707	0.0333339	2.49002	1.47711
ZFAND6	629.574	50	48.8429	7	12.5915	6.97756	1.80457	0.298237	0.0333799	0.851654	1.47652
TMEM2	84.9706	45	6.79165	6	1.69941	0.970235	1.75155	0.0346067	0.0335171	0.808629	1.47473
PTGR1	956.398	50	44.4641	7	19.128	6.35201	3.01132	0.0351302	0.0335315	1.5904	1.47455
ZNF362	145.091	44	10.2263	6	2.90182	1.4609	1.98633	0.00768611	0.0338054	0.990105	1.47101
PDE4D	437.867	47	22.5136	4	8.75733	3.21623	2.72286	0.0139313	0.0338786	1.44512	1.47007
CD109	211.134	45	12.2507	4	4.22269	1.75009	2.41283	0.0233778	0.0339011	1.27073	1.46979
CATSPERB	65.9682	26	1.79243	1	1.31936	0.256062	5.15252	0.0013959	0.0339645	2.36528	1.46897
CSF2RA	57.9666	30	2.18091	2	1.15933	0.311558	3.72108	0.010917	0.0341713	1.89572	1.46634
ZNF880	11.8382	19	0.400444	1	0.236765	0.0572064	4.13878	0.0253497	0.034352	2.04921	1.46405
ANKRD17	505.934	50	35.2892	7	10.1187	5.04131	2.00715	0.130899	0.0343766	1.00515	1.46374
SLC12A6	14.8246	23	4.53712	5	0.296493	0.648161	0.457437	0.299766	0.0343955	-1.12835	1.4635
LAMA3	83.8862	40	1.99323	1	1.67772	0.284747	5.89198	0.0525207	0.034431	2.55875	1.46305
GRIK2	16.1202	21	0.513773	1	0.322404	0.0733961	4.39266	0.00918354	0.0347358	2.1351	1.45922
HACD1	58.947	31	3.01224	3	1.17894	0.430321	2.73968	0.0479008	0.0347735	1.45401	1.45875
RP11-520M5.5	8.84383	13	0.251606	1	0.176877	0.0359438	4.92093	0.00218617	0.0348449	2.29893	1.45786
ENAH	161.023	46	8.92062	5	3.22046	1.27437	2.52709	0.00158254	0.034869	1.33748	1.45756
STAC3	7.19233	13	0.217621	1	0.143847	0.0310888	4.62696	0.00449666	0.0349268	2.21007	1.45684
INSR	24.8089	29	1.12795	2	0.496179	0.161135	3.07926	0.0271345	0.035101	1.62259	1.45468
EEF2	9.97532	13	4.85673	4	0.199506	0.693818	0.287549	0.144218	0.0351732	-1.79812	1.45379
SLC29A4	40.4617	32	1.38541	1	0.809234	0.197916	4.08878	0.0296817	0.0352236	2.03167	1.45317
PACS1	30.9561	28	1.65219	3	0.619122	0.236027	2.6231	0.0227703	0.035427	1.39127	1.45067
HERC3	33.84	38	0.903657	1	0.676799	0.129094	5.24269	0.104192	0.035485	2.39031	1.44996
LRCH1	92.2031	46	4.88922	3	1.84406	0.698459	2.64018	0.715492	0.0355813	1.40064	1.44878
PXYLP1	29.3871	29	1.47019	3	0.587741	0.210027	2.7984	0.00917226	0.0357379	1.4846	1.44687
DEPDC5	99.4075	49	7.80462	6	1.98815	1.11495	1.78318	0.0171533	0.0358243	0.834453	1.44582
CMPK1	97.9578	48	4.90287	3	1.95916	0.70041	2.79715	0.336312	0.0358482	1.48396	1.44553
EEFSEC	240.156	49	19.9389	7	4.80311	2.84842	1.68624	0.0164999	0.0359012	0.753808	1.44489
SEPHS1	19.6268	27	6.89222	5	0.392536	0.984602	0.398674	0.218432	0.0361227	-1.32672	1.44222
TNS3	367.523	50	20.9545	6	7.35046	2.99349	2.45548	0.0478207	0.036125	1.296	1.44219
TPK1	9.10835	14	0.286956	1	0.182167	0.0409937	4.44378	0.00707969	0.0362206	2.15179	1.44104
GSTK1	8.37516	16	0.256886	1	0.167503	0.0366981	4.56436	0.0048965	0.0364476	2.19041	1.43833
NECTIN1	21.3336	25	0.906713	2	0.426671	0.12953	3.29399	0.0204756	0.0365624	1.71984	1.43697
PICALM	2215.19	50	169.339	7	44.3039	24.1913	1.83139	0.069209	0.0367327	0.872942	1.43495
SMC1B	24.4622	16	0.583509	1	0.489244	0.0833584	5.86915	0.000352051	0.0370367	2.55315	1.43137
CLK4	7.6539	15	0.256886	1	0.153078	0.0366981	4.17128	0.0172922	0.0372901	2.06049	1.42841
ZUFSP	59.4096	39	15.2305	7	1.18819	2.17578	0.546099	0.64353	0.0374521	-0.872766	1.42652
HNRNPH3	14.5867	28	7.48037	6	0.291733	1.06862	0.272999	0.00141993	0.0374947	-1.87303	1.42603
MRS2	56.3857	44	2.49145	2	1.12771	0.355922	3.16843	0.297858	0.0375206	1.66377	1.42573
GLIS2	336.043	50	20.2218	6	6.72087	2.88882	2.32651	0.173305	0.0378914	1.21817	1.42146
EGFR	43.8144	37	1.84662	3	0.876289	0.263802	3.32176	0.0096405	0.0379163	1.73195	1.42117
FARSB	77.4048	44	3.27953	4	1.5481	0.468504	3.30434	0.0923827	0.0379331	1.72436	1.42098
PKP4	144.436	47	10.2327	6	2.88873	1.46181	1.97613	0.0253644	0.0379979	0.982679	1.42024
TRAFD1	7.12677	17	0.251606	1	0.142535	0.0359438	3.96551	0.0434615	0.0380094	1.98751	1.42011
KMT2A	88.3652	49	5.42982	5	1.7673	0.775689	2.27837	0.295419	0.0382573	1.188	1.41729
ITGB1	48.9103	37	2.75947	3	0.978206	0.394211	2.48143	0.0336916	0.0385011	1.31117	1.41453
BAZ1A	649.736	50	46.0539	7	12.9947	6.57913	1.97514	0.00141227	0.0385171	0.981958	1.41435
SCFD1	365.763	50	27.2102	7	7.31526	3.88717	1.8819	0.441819	0.0385532	0.912189	1.41394
TCEA3	8.87819	16	0.256886	1	0.177564	0.0366981	4.8385	0.00218351	0.038646	2.27456	1.41289
SENP2	151.299	50	10.6131	6	3.02598	1.51616	1.99582	0.0948527	0.038853	0.99698	1.41058
GNL3	34.3445	43	1.36177	2	0.686891	0.194538	3.53088	0.138955	0.0390171	1.82003	1.40875
MIPEP	34.5276	30	2.21744	4	0.690551	0.316777	2.17993	0.0319502	0.0394932	1.12428	1.40348
NEDD4L	173.595	46	10.9313	6	3.4719	1.56161	2.22328	0.00516352	0.039766	1.15269	1.40049
FBXO42	25.3287	33	6.77343	6	0.506575	0.967633	0.523519	0.628198	0.0399862	-0.933685	1.39809
NBAS	661.337	50	64.7604	7	13.2267	9.25148	1.42969	0.0401767	0.0402112	0.515701	1.39565
WDR44	113.845	49	7.31732	6	2.27689	1.04533	2.17815	0.0601304	0.0405148	1.12311	1.39239
SEC23B	82.0817	48	4.56023	3	1.64163	0.651462	2.51992	0.539187	0.0405955	1.33338	1.39152
VWDE	36.1143	31	1.50827	2	0.722286	0.215467	3.35219	0.00329936	0.0407186	1.7451	1.39021
CUBN	8.57773	16	0.256886	1	0.171555	0.0366981	4.67476	0.00290619	0.0408498	2.22489	1.38881
TOLLIP	81.8878	46	6.04319	6	1.63776	0.863314	1.89706	0.0299863	0.0408921	0.923764	1.38836
HECW2	69.586	33	3.26393	3	1.39172	0.466275	2.98476	0.0114654	0.0409847	1.57762	1.38738
HIF1A	268.325	50	15.366	6	5.36651	2.19514	2.44473	0.0710035	0.0410867	1.28967	1.3863
SH3KBP1	79.6542	46	6.6974	6	1.59308	0.956772	1.66506	0.0377024	0.041145	0.735575	1.38568
DUSP4	12.8256	21	0.435243	1	0.256512	0.0621776	4.12548	0.015684	0.0412549	2.04456	1.38452
CPEB2	17.6512	24	0.604644	1	0.353023	0.0863777	4.08697	0.0176983	0.0417982	2.03103	1.37884
GABRA3	17.2857	18	0.604644	1	0.345714	0.0863777	4.00235	0.0256852	0.0418591	2.00085	1.37821
TRNAU1AP	7.53242	15	0.251606	1	0.150648	0.0359438	4.19122	0.0116974	0.0418743	2.06737	1.37805
STX17	60.2079	45	2.81403	3	1.20416	0.402005	2.99538	0.135217	0.0420402	1.58274	1.37634
BUB1	117.157	47	7.86048	4	2.34313	1.12293	2.08663	0.564695	0.0420796	1.06118	1.37593
PHF20L1	85.9032	50	5.78721	5	1.71806	0.826744	2.07811	0.864935	0.042381	1.05527	1.37283
ISPD	285.473	46	14.675	6	5.70946	2.09644	2.72341	0.00159183	0.0424582	1.44541	1.37204
SREBF2	23.3945	38	0.6874	1	0.467889	0.0982	4.76466	0.154435	0.0425165	2.25237	1.37144
SLC12A2	161.883	47	7.4419	5	3.23767	1.06313	3.04542	0.000235836	0.0428414	1.60664	1.36814
ZCCHC2	233.409	49	17.7703	6	4.66819	2.53862	1.83887	0.0308555	0.0430367	0.878819	1.36616
LYN	107.633	49	4.93134	4	2.15266	0.704478	3.05568	0.213013	0.0432378	1.61149	1.36414
ARNT	32.4132	36	1.88637	3	0.648263	0.269482	2.40559	0.0283322	0.0436388	1.26639	1.36013
UBE2Q2P1	106.556	48	6.11737	4	2.13113	0.87391	2.43861	0.27712	0.0436601	1.28606	1.35991
TAOK3	99.4552	47	5.17475	5	1.9891	0.73925	2.6907	0.0553492	0.0436725	1.42798	1.35979
FOXM1	21.3964	36	10.4497	6	0.427927	1.49281	0.286659	2.24976e-05	0.044131	-1.80259	1.35526
CNOT2	213.835	50	15.4285	5	4.2767	2.20408	1.94036	0.975276	0.0442887	0.956322	1.35371
SERINC5	32.5784	35	1.48867	2	0.651567	0.212667	3.06379	0.0103833	0.0447278	1.61532	1.34942
LZIC	383.97	50	29.1677	6	7.6794	4.16682	1.84299	0.607084	0.0449202	0.882048	1.34756
BNIP2	42.7264	46	2.21427	3	0.854528	0.316324	2.70143	0.179901	0.0449305	1.43373	1.34746
FANCB	155.893	49	36.7273	7	3.11787	5.24675	0.594247	0.506374	0.0450229	-0.750864	1.34657
RHOBTB3	2964.67	50	160.245	7	59.2933	22.8921	2.59012	0.282282	0.0453472	1.37302	1.34345
GRIP1	128.159	42	6.07509	3	2.56318	0.86787	2.95341	0.0455373	0.0454121	1.56238	1.34283
IRAK3	44.5621	17	1.00509	2	0.891243	0.143584	6.20712	1.05749e-05	0.0455457	2.63392	1.34155
SLC25A32	92.75	46	23.0564	5	1.855	3.29377	0.563184	0.05848	0.0457446	-0.828322	1.33966
RAB5A	51.2109	47	3.26022	3	1.02422	0.465746	2.19909	0.761216	0.0457729	1.13691	1.33939
NOC3L	31.4553	30	1.1043	2	0.629106	0.157758	3.9878	0.000458136	0.0459237	1.99559	1.33796
MECOM	18.4425	23	0.604644	1	0.36885	0.0863777	4.2702	0.00705112	0.0459988	2.0943	1.33725
INMT-FAM188B	25.754	28	1.45055	3	0.51508	0.207222	2.48564	0.036028	0.0463574	1.31362	1.33388
ACSL3	308.378	50	17.1849	4	6.16757	2.45499	2.51226	0.323406	0.0463974	1.32898	1.33351
TLK2	151.631	50	11.81	6	3.03262	1.68714	1.79749	0.226927	0.0466156	0.845983	1.33147
SH2B3	70.3188	36	29.6902	7	1.40638	4.24145	0.331579	0.534237	0.0466192	-1.59258	1.33144
KIF16B	159.554	50	10.3626	6	3.19109	1.48038	2.15559	0.305849	0.0474691	1.10808	1.32359
RICTOR	564.289	50	37.9247	7	11.2858	5.41781	2.08309	0.0800448	0.0478514	1.05872	1.32011
LTN1	27.1506	37	0.96006	2	0.543013	0.137151	3.95922	0.0860651	0.0478992	1.98522	1.31967
NUP188	31.4493	39	7.98694	6	0.628986	1.14099	0.551263	0.817362	0.0480273	-0.859187	1.31851
PPP1R13B	266.878	50	21.7572	7	5.33757	3.10818	1.71727	0.169879	0.0483367	0.780114	1.31572
ZNF684	6.23525	14	0.217621	1	0.124705	0.0310888	4.01125	0.0156776	0.0485515	2.00405	1.3138
GREB1L	232.035	47	12.6608	4	4.64071	1.80868	2.5658	0.0338544	0.0486822	1.35941	1.31263
CEP164	16.1657	22	0.760438	2	0.323315	0.108634	2.97618	0.0306697	0.0490339	1.57346	1.3095
ADSS	39.3872	42	1.91788	3	0.787744	0.273983	2.87516	0.276777	0.0493673	1.52364	1.30656
SLC35F5	92.0173	45	6.83625	5	1.84035	0.976607	1.88443	0.0155017	0.0494739	0.914128	1.30562
YWHAQ	21.2978	25	7.10389	5	0.425955	1.01484	0.419726	0.128521	0.0496728	-1.25248	1.30388
PLXNA2	58.0829	34	2.33933	2	1.16166	0.33419	3.47605	0.0145512	0.0499306	1.79745	1.30163
PRELID2	461.085	50	35.2528	6	9.22171	5.03612	1.83111	0.0120848	0.0507576	0.872721	1.2945
SOS2	263.143	50	20.5854	7	5.26286	2.94077	1.78962	0.84895	0.0508805	0.839652	1.29345
TCFL5	165.221	47	13.8509	7	3.30442	1.9787	1.66999	0.017915	0.0509482	0.73984	1.29287
KIF4A	140.678	50	32.449	7	2.81356	4.63557	0.60695	0.394239	0.0512099	-0.720351	1.29065
EPB41	106.248	49	6.72331	6	2.12496	0.960473	2.21241	0.209588	0.051467	1.14562	1.28847
MKLN1	1025.92	50	92.395	7	20.5184	13.1993	1.55451	0.952732	0.0514845	0.636458	1.28832
FNIP1	142.58	50	7.80038	4	2.85161	1.11434	2.55901	0.239633	0.0517038	1.35559	1.28648
ZDHHC7	61.736	43	2.20047	1	1.23472	0.314353	3.92781	0.384996	0.0517463	1.97373	1.28612
NRP2	7.33605	15	0.256886	1	0.146721	0.0366981	3.99806	0.0136907	0.051826	1.9993	1.28545
MRPL35	7.32007	15	0.256886	1	0.146401	0.0366981	3.98935	0.0140575	0.0519804	1.99615	1.28416
DNAJC2	190.907	50	13.2089	6	3.81814	1.88699	2.0234	0.0862464	0.0521637	1.01678	1.28263
GPR161	7.81017	15	2.7755	5	0.156203	0.3965	0.393956	0.777664	0.0522902	-1.34389	1.28158
WAPL	237.446	50	21.3521	7	4.74891	3.0503	1.55686	0.382886	0.0523385	0.638644	1.28118
PTPRH	7.53049	14	0.251606	1	0.15061	0.0359438	4.19015	0.00667163	0.0523704	2.067	1.28091
BANP	955.641	50	79.0444	7	19.1128	11.2921	1.69259	0.97341	0.0524466	0.759231	1.28028
DGKG	23.8393	22	0.815565	1	0.476787	0.116509	4.09226	0.00922443	0.0525685	2.0329	1.27927
TOGARAM1	191.037	50	15.8548	7	3.82073	2.26497	1.68688	0.427133	0.0526583	0.754355	1.27853
ALDH18A1	29.8987	37	1.50822	3	0.597973	0.21546	2.77533	0.198792	0.0526824	1.47266	1.27833
DHRSX	59.9709	41	3.47372	3	1.19942	0.496246	2.41698	0.0326487	0.0531533	1.27321	1.27447
FRMD3	18.8354	25	0.692129	1	0.376707	0.0988756	3.80991	0.0294307	0.0532044	1.92976	1.27405
STK38	97.1236	48	5.73892	5	1.94247	0.819846	2.36931	0.12336	0.0532391	1.24447	1.27377
PCGF5	16.0597	21	0.583509	1	0.321195	0.0833584	3.85318	0.023692	0.053247	1.94605	1.27371
MYOF	529.448	50	35.0136	7	10.589	5.00194	2.11697	0.105076	0.053754	1.082	1.26959
ITGA2	12.1292	19	0.435243	1	0.242583	0.0621776	3.90146	0.0183723	0.0537901	1.96401	1.2693
CCZ1	154.293	50	10.3303	7	3.08586	1.47576	2.09103	0.0710176	0.0538272	1.06422	1.269
ST13	31.1028	40	1.14761	2	0.622056	0.163945	3.79431	0.0667029	0.0538426	1.92384	1.26887
XKR9	87.3295	37	4.34785	4	1.74659	0.621121	2.812	0.00493345	0.053934	1.49159	1.26814
CNOT3	27.4417	40	1.15642	2	0.548834	0.165202	3.3222	0.157265	0.0539598	1.73214	1.26793
PHTF2	35.3727	38	2.04276	3	0.707454	0.291823	2.42426	0.384405	0.0539897	1.27754	1.26769
EVA1A	58.686	28	2.89453	2	1.17372	0.413505	2.83847	0.0432678	0.0540948	1.50511	1.26684
RPS6KA2	22.8664	23	0.981303	2	0.457329	0.140186	3.2623	0.0160683	0.0541879	1.70589	1.2661
SNX13	837.588	50	59.3268	7	16.7518	8.47526	1.97655	0.503946	0.054387	0.982982	1.26451
RAB14	8.30891	18	0.286956	1	0.166178	0.0409937	4.05375	0.00964122	0.0544703	2.01926	1.26384
XRN2	467.519	50	33.4811	7	9.35038	4.78301	1.95492	0.259262	0.0546597	0.967106	1.26233
CENPU	12.759	22	0.618066	2	0.255181	0.0882951	2.89009	0.0338287	0.0547422	1.53111	1.26168
PLEKHG1	27.1982	23	1.0071	1	0.543965	0.143872	3.7809	0.0308735	0.0547438	1.91873	1.26167
UBLCP1	54.1472	43	2.31748	2	1.08294	0.331069	3.27105	0.366556	0.0548043	1.70975	1.26119
KANSL1L	398.103	50	29.7369	7	7.96206	4.24812	1.87425	0.0350073	0.0549266	0.906316	1.26022
DNAH14	2511.04	50	180.597	7	50.2208	25.7996	1.94657	0.122213	0.0550411	0.960937	1.25931
SRR	7.47821	15	0.251606	1	0.149564	0.0359438	4.16106	0.00645651	0.0551413	2.05695	1.25852
E2F7	6.04398	15	0.217621	1	0.12088	0.0310888	3.8882	0.0177922	0.0553667	1.9591	1.25675
GALNT7	91.9645	44	23.9453	6	1.83929	3.42076	0.537686	0.381868	0.0554102	-0.895166	1.25641
ASXL2	183.365	50	15.4593	7	3.66731	2.20847	1.66057	0.438903	0.0554236	0.731677	1.25631
STK3	928.577	50	76.1803	7	18.5715	10.8829	1.70649	0.00916446	0.0554398	0.77103	1.25618
RBL2	69.7762	47	4.67158	4	1.39552	0.667368	2.09108	0.491544	0.0555689	1.06425	1.25517
RP11-78J21.7	2.85924	8	5.97483	6	0.0571848	0.853547	0.0669966	5.2609e-15	0.0557228	-3.89977	1.25397
RPAP2	425.434	50	33.9097	7	8.50868	4.84425	1.75645	0.103476	0.055815	0.812663	1.25325
EXOC5	97.5516	49	7.58121	6	1.95103	1.08303	1.80146	0.345912	0.0559184	0.849164	1.25245
ANKRD52	5.37342	12	4.01823	5	0.107468	0.574033	0.187216	0.000128175	0.0562443	-2.41722	1.24992
AHRR	27.9223	29	9.13312	5	0.558446	1.30473	0.428016	0.365564	0.0565131	-1.22426	1.24785
PLEKHM1	256.205	49	19.9795	7	5.12411	2.85422	1.79528	0.678752	0.0568937	0.844205	1.24494
MTRF1	99.7357	50	9.4575	7	1.99471	1.35107	1.47639	0.0296924	0.0569607	0.562078	1.24442
TMCC1	226.063	50	16.7703	4	4.52125	2.39575	1.8872	0.521143	0.0570121	0.916244	1.24403
RASA2	155.165	50	8.10786	5	3.1033	1.15827	2.67926	0.0598165	0.0571551	1.42184	1.24294
ANKRD13C	487.635	50	42.0091	7	9.7527	6.00129	1.6251	0.325122	0.0578192	0.700528	1.23793
CEP63	20.8963	31	0.669061	1	0.417926	0.0955802	4.37252	0.186329	0.0578666	2.12846	1.23757
SDHC	31.1414	32	1.27421	2	0.622829	0.18203	3.42157	0.001571	0.0579369	1.77466	1.23704
CAMK2G	51.0357	34	3.03682	4	1.02071	0.433831	2.35279	0.0251051	0.0579581	1.23437	1.23689
CHEK2	195.937	50	11.5384	6	3.91874	1.64835	2.37738	0.107138	0.0579869	1.24937	1.23667
AC000095.6	18.5888	16	0.788919	2	0.371776	0.112703	3.29874	0.00189034	0.0580735	1.72191	1.23602
NUPL2	295.679	50	31.0214	7	5.91358	4.43163	1.3344	0.0358477	0.0581048	0.416196	1.23579
DNAAF5	137.639	49	12.2875	7	2.75278	1.75536	1.56821	0.0129723	0.0588433	0.64912	1.2303
CHMP5	58.639	43	5.03861	6	1.17278	0.719802	1.62931	0.0421824	0.0588453	0.704259	1.23029
SLC41A2	32.635	37	1.28443	1	0.652699	0.18349	3.55713	0.573377	0.0592674	1.83071	1.22718
ARID4A	110.885	49	6.76955	3	2.2177	0.967079	2.29319	0.599951	0.059309	1.19736	1.22688
PCED1B	7.89641	11	0.251606	1	0.157928	0.0359438	4.39376	0.00269644	0.05989	2.13546	1.22265
COPB2	10.4827	23	0.400444	1	0.209654	0.0572064	3.66487	0.0409692	0.0601118	1.87376	1.22104
PTGES3	264.303	50	23.0843	6	5.28606	3.29776	1.60292	0.397148	0.0602044	0.680705	1.22037
MORC3	92.4234	49	5.96262	4	1.84847	0.851803	2.17007	0.562636	0.060277	1.11774	1.21985
SPTBN1	20.6143	35	5.46507	5	0.412286	0.780724	0.528082	0.434651	0.0604301	-0.921165	1.21875
SPIN1	28.6963	36	1.2988	2	0.573925	0.185543	3.09322	0.215097	0.0604997	1.62911	1.21825
UTP18	268.696	50	18.1451	6	5.37392	2.59215	2.07315	0.205009	0.0606062	1.05183	1.21748
ACTR10	54.8595	47	2.72041	4	1.09719	0.388631	2.82322	0.0840369	0.0607838	1.49734	1.21621
BCAS3	118.191	47	9.05297	5	2.36382	1.29328	1.82777	0.0356812	0.0612102	0.870085	1.21318
SLC31A1	27.1392	28	1.30224	2	0.542784	0.186035	2.91765	0.0119379	0.0612696	1.54481	1.21275
WNK3	6.39008	12	2.67235	4	0.127802	0.381764	0.334766	0.616088	0.0615044	-1.57877	1.21109
TUBGCP3	298.511	50	28.8413	7	5.97021	4.12018	1.44902	0.0190853	0.0615413	0.535073	1.21083
PSMD9	15.804	27	4.7878	4	0.316079	0.683971	0.462123	0.0797121	0.0616355	-1.11365	1.21017
WNK2	11.0524	16	0.251606	1	0.221047	0.0359438	6.14981	0.000105826	0.0616788	2.62054	1.20986
SMEK1	250.279	50	17.5471	6	5.00557	2.50673	1.99686	0.456796	0.0620254	0.997731	1.20743
FLII	6.82685	15	0.256886	1	0.136537	0.0366981	3.72055	0.0264632	0.0622686	1.89552	1.20573
ACP6	89.019	47	3.55963	3	1.78038	0.508518	3.50111	0.105491	0.0623957	1.80781	1.20485
SNX7	78.2046	45	5.73877	5	1.56409	0.819824	1.90784	0.042486	0.0624347	0.93194	1.20457
DCTN2	43.4885	31	1.99017	2	0.86977	0.28431	3.05923	0.00943332	0.0627703	1.61317	1.20225
RP11-274B21.1	181.915	50	10.9898	6	3.6383	1.56997	2.31744	0.0632067	0.0628081	1.21253	1.20198
PLXND1	23.4238	26	1.15216	2	0.468477	0.164594	2.84626	0.0334374	0.0629169	1.50907	1.20123
RP11-36B6.2	22.092	30	0.604644	1	0.44184	0.0863777	5.11521	0.063707	0.0633957	2.35479	1.19794
ATXN1	260.456	48	16.5808	4	5.20911	2.36868	2.19916	0.0408374	0.0635083	1.13695	1.19717
RP1	17.8036	7	0.286956	1	0.356071	0.0409937	8.68601	7.34726e-06	0.063591	3.11869	1.1966
SMN2	13.1096	21	0.503552	1	0.262192	0.0719359	3.6448	0.0363793	0.0637312	1.86584	1.19565
DAXX	6.00775	13	0.217621	1	0.120155	0.0310888	3.8649	0.0127235	0.063788	1.95043	1.19526
NDUFAF6	55.1165	45	3.46724	3	1.10233	0.495319	2.22549	0.769521	0.0638267	1.15412	1.195
ALDH9A1	24.5837	34	1.03319	2	0.491673	0.147598	3.33116	0.290074	0.0639038	1.73603	1.19447
CNOT11	56.6332	45	3.68964	4	1.13266	0.527091	2.1489	0.370927	0.0639239	1.1036	1.19434
TEAD1	360.637	50	28.7933	7	7.21275	4.11333	1.75351	0.542464	0.0640008	0.810243	1.19381
SWT1	58.7529	44	3.19129	4	1.17506	0.455898	2.57746	0.0928013	0.0640863	1.36595	1.19323
SS18	100.128	46	8.60298	6	2.00255	1.229	1.62942	0.0352036	0.0642314	0.704361	1.19225
POM121C	23.9921	34	6.52609	5	0.479843	0.932298	0.514688	0.265522	0.0643239	-0.95823	1.19163
GPATCH2L	328.446	50	22.2105	6	6.56893	3.17293	2.0703	0.555486	0.0645453	1.04984	1.19014
GRHPR	214.324	49	40.0254	7	4.28648	5.71791	0.749658	0.0341708	0.0649188	-0.415695	1.18763
NADSYN1	8.76184	20	2.66097	4	0.175237	0.380139	0.460981	0.121909	0.0649191	-1.11722	1.18763
PER2	78.502	41	6.49659	6	1.57004	0.928084	1.6917	0.0265307	0.0650127	0.758473	1.187
CENPI	118.372	47	11.0352	7	2.36743	1.57646	1.50174	0.0361685	0.0650383	0.586632	1.18683
TMEM156	25.5699	22	1.14357	2	0.511398	0.163367	3.13036	0.00345201	0.0650544	1.64633	1.18672
CTBP2	353.558	50	25.1351	7	7.07115	3.59074	1.96928	0.0537834	0.0651127	0.977666	1.18633
WDR41	208.684	48	13.0844	6	4.17368	1.86919	2.23287	0.0928462	0.0652238	1.1589	1.18559
NDC80	34.3478	38	8.67586	6	0.686957	1.23941	0.554262	0.114804	0.0653681	-0.85136	1.18463
SETD2	508.119	50	54.975	7	10.1624	7.85357	1.29398	0.00880809	0.0655235	0.371817	1.1836
PAPD7	163.903	49	16.154	7	3.27806	2.30772	1.42048	0.00144323	0.065642	0.506374	1.18282
TARSL2	74.6146	46	3.5955	4	1.49229	0.513643	2.90531	0.0672192	0.0658685	1.53869	1.18132
KLHL7	31.9685	42	1.75612	3	0.639371	0.250875	2.54857	0.19086	0.0660934	1.34969	1.17984
ZNF841	112.71	44	9.44675	6	2.2542	1.34954	1.67035	0.00924511	0.0663114	0.740152	1.17841
RBPMS	68.3758	35	4.23574	4	1.36752	0.605106	2.25996	0.00691205	0.0664316	1.1763	1.17763
CABYR	282.772	44	15.2458	5	5.65544	2.17797	2.59666	0.0195134	0.0666688	1.37666	1.17608
EMC2	383.892	49	26.582	6	7.67784	3.79743	2.02185	0.64132	0.0667344	1.01568	1.17565
PLS1	51.4488	39	2.83448	3	1.02898	0.404926	2.54115	0.00789758	0.0668149	1.34548	1.17513
YBX1	1.86995	6	2.48494	4	0.0373991	0.354992	0.105352	2.66553e-08	0.0669503	-3.24671	1.17425
ZNF215	149.551	39	10.7631	6	2.99101	1.53758	1.94527	0.0109897	0.067125	0.959974	1.17312
C1orf116	233.242	39	9.53575	3	4.66484	1.36225	3.42437	0.0189972	0.0672114	1.77584	1.17256
LRRC37A3	19.6347	37	0.886683	2	0.392694	0.126669	3.10016	0.363601	0.067319	1.63234	1.17186
D2HGDH	6.21354	13	0.217621	1	0.124271	0.0310888	3.99729	0.00666352	0.0673516	1.99902	1.17165
PARD3	685.231	50	44.0012	7	13.7046	6.28588	2.18022	0.2542	0.0677574	1.12447	1.16904
PTK2	6475.85	50	520.682	7	129.517	74.3832	1.74121	0.705187	0.0677997	0.800094	1.16877
CBFA2T2	432.5	49	32.3099	6	8.65	4.61571	1.87404	0.371764	0.0678389	0.906149	1.16852
AKAP13	316.558	50	22.4158	7	6.33117	3.20226	1.97709	0.16823	0.068069	0.98338	1.16705
GOLPH3	369.841	49	28.0098	6	7.39682	4.0014	1.84856	0.449627	0.0681261	0.886402	1.16669
PGD	107.505	42	6.64135	5	2.1501	0.948765	2.26621	0.015402	0.0682726	1.18028	1.16575
SYNCRIP	72.6043	47	16.1054	7	1.45209	2.30077	0.63113	0.449798	0.0683931	-0.663991	1.16499
SLC25A40	9.89093	19	0.508493	2	0.197819	0.0726418	2.7232	0.0243574	0.0684603	1.44531	1.16456
U2AF1L5	17.6785	24	1.04739	3	0.353569	0.149628	2.36299	0.0239432	0.068799	1.24062	1.16242
ZC3H4	30.1909	38	0.949016	1	0.603818	0.135574	4.4538	0.134941	0.0694541	2.15504	1.1583
DOPEY1	35.7365	41	1.69367	3	0.71473	0.241953	2.954	0.0985604	0.0697136	1.56267	1.15668
OCIAD1	24.9672	37	6.22006	6	0.499344	0.88858	0.561957	0.0767429	0.0698155	-0.831469	1.15605
SIRT1	18.5968	32	0.669061	1	0.371936	0.0955802	3.89136	0.299708	0.0698464	1.96027	1.15586
KCTD13	10.7086	20	0.400444	1	0.214171	0.0572064	3.74383	0.0159993	0.0698577	1.90452	1.15579
TMEM57	21.2365	31	0.583509	1	0.42473	0.0833584	5.09522	0.0574482	0.0700343	2.34915	1.15469
PPP4R1	1271.48	50	111.896	7	25.4296	15.9851	1.59083	0.187588	0.0709466	0.669783	1.14907
KCTD3	144.378	50	14.3598	7	2.88755	2.0514	1.4076	0.00135763	0.071131	0.49324	1.14794
CDC42BPA	322.325	50	32.4392	7	6.44651	4.63417	1.39108	0.0119037	0.0711398	0.476208	1.14789
KDM3A	39.8289	41	2.87982	4	0.796579	0.411403	1.93625	0.0260921	0.0711515	0.953266	1.14782
MNAT1	178.951	50	12.0611	5	3.57902	1.72301	2.07719	0.785761	0.0712926	1.05463	1.14696
SLC39A10	171.842	49	13.9538	7	3.43685	1.9934	1.72412	0.0108405	0.0714618	0.785856	1.14593
SDCCAG8	474.918	50	35.0516	7	9.49836	5.00737	1.89688	0.0879728	0.0715253	0.923626	1.14554
THRB	42.1563	31	2.66974	4	0.843126	0.381391	2.21066	0.00256232	0.0719146	1.14448	1.14318
MAGED1	6.8775	14	0.256886	1	0.13755	0.0366981	3.74816	0.0142399	0.0719952	1.90618	1.1427
RNF19B	220.472	49	19.5564	7	4.40943	2.79377	1.57831	0.0290564	0.0721785	0.65838	1.14159
GTF2F2	79.4862	48	4.87699	5	1.58972	0.696714	2.28175	0.224944	0.0721912	1.19014	1.14152
RBM23	962.139	50	82.936	7	19.2428	11.848	1.62414	0.101594	0.0726555	0.699673	1.13873
PTPN3	43.3333	43	2.26536	3	0.866667	0.323623	2.67801	0.266161	0.0726588	1.42116	1.13871
LIMCH1	129.7	41	8.12462	4	2.59401	1.16066	2.23494	0.00330784	0.0732535	1.16024	1.13517
PPIP5K2	37.1628	41	9.85742	6	0.743255	1.4082	0.527804	0.23418	0.0737658	-0.921925	1.13215
SNX24	10.0523	15	0.400444	1	0.201045	0.0572064	3.51439	0.0425582	0.0738573	1.81327	1.13161
EFCAB13	276.374	49	14.1262	3	5.52747	2.01803	2.73905	0.142103	0.0739692	1.45367	1.13095
C9orf3	101.413	48	7.72277	4	2.02826	1.10325	1.83843	0.686135	0.0740047	0.878475	1.13074
RALGAPA2	39.9676	42	1.41895	2	0.799351	0.202708	3.94337	0.112038	0.0744596	1.97943	1.12808
TAF2	287.218	50	25.3271	7	5.74435	3.61815	1.58765	0.841084	0.0751458	0.666891	1.1241
DENND3	139.77	46	7.78633	5	2.79539	1.11233	2.51309	0.0779058	0.0752442	1.32946	1.12353
GALNT14	36.4135	29	2.29844	3	0.728269	0.328348	2.21798	0.0275471	0.0757188	1.14924	1.1208
TECPR2	42.6159	41	2.31832	3	0.852318	0.331189	2.57351	0.217392	0.0757347	1.36374	1.12071
ZC2HC1A	7.0379	12	0.256886	1	0.140758	0.0366981	3.83557	0.00855881	0.0757955	1.93944	1.12036
MLF2	9.44788	15	9.18983	4	0.188958	1.31283	0.143931	4.46041e-05	0.0758873	-2.79655	1.11983
BROX	113.136	50	7.76486	5	2.26272	1.10927	2.03984	0.164784	0.0759752	1.02846	1.11933
LPCAT2	6.5446	15	0.256886	1	0.130892	0.0366981	3.56673	0.0279739	0.0760741	1.8346	1.11876
CLNS1A	932.648	50	90.7119	7	18.653	12.9588	1.4394	0.0192448	0.0762289	0.525467	1.11788
ZCCHC11	596.668	50	50.1712	7	11.9334	7.16732	1.66497	0.274472	0.0762469	0.735495	1.11778
NPR3	14.268	16	0.503552	1	0.285361	0.0719359	3.96687	0.00525056	0.076486	1.988	1.11642
ARL13B	282.851	50	24.8914	7	5.65702	3.55592	1.59087	0.0495729	0.0766798	0.669819	1.11532
GCLM	131.505	46	7.69623	6	2.63009	1.09946	2.39217	0.00187725	0.077031	1.25832	1.11333
KCNC4	6.68674	11	0.217621	1	0.133735	0.0310888	4.30171	0.0019408	0.0770556	2.10491	1.1132
NAGPA	7.31871	13	0.256886	1	0.146374	0.0366981	3.98861	0.00476827	0.0772112	1.99588	1.11232
TTC17	57.5879	45	3.72267	4	1.15176	0.53181	2.16573	0.257872	0.0772538	1.11486	1.11208
AC068831.18	21.6079	32	0.801131	2	0.432157	0.114447	3.77604	0.0750577	0.0774372	1.91687	1.11105
DRAM1	22.0725	26	1.24084	3	0.441451	0.177263	2.49037	0.00612971	0.0778365	1.31636	1.10882
ATAD5	104.476	49	23.2082	7	2.08952	3.31546	0.630236	0.305354	0.0781072	-0.666037	1.10731
ACIN1	22.6911	36	0.981303	2	0.453823	0.140186	3.23729	0.262575	0.0781113	1.69479	1.10729
COL4A3BP	114.009	48	10.8215	7	2.28019	1.54592	1.47497	0.0431389	0.0782658	0.560682	1.10643
FGD6	1767.38	50	134.97	7	35.3476	19.2814	1.83325	0.140882	0.0784758	0.874405	1.10526
PDSS2	5.88562	12	2.3526	3	0.117712	0.336086	0.350245	0.110973	0.0785229	-1.51356	1.105
UBN1	5.39827	13	4.38551	4	0.107965	0.626502	0.17233	4.81025e-06	0.0785495	-2.53675	1.10486
KATNAL1	91.0957	44	7.38966	5	1.82191	1.05567	1.72584	0.0156136	0.0785945	0.787301	1.10461
SPAST	232.539	50	18.2307	6	4.65077	2.60438	1.78575	0.52122	0.0787911	0.83653	1.10352
RGMB	2.00098	6	2.41863	4	0.0400197	0.345518	0.115825	1.86157e-07	0.0787936	-3.10998	1.10351
SEC31A	932.74	50	80.8534	7	18.6548	11.5505	1.61507	0.28662	0.0788008	0.691593	1.10347
PHKA1	9.15526	17	0.469228	2	0.183105	0.0670325	2.73159	0.0146999	0.0788502	1.44974	1.1032
DENND1A	351.347	50	23.7296	6	7.02693	3.38995	2.07287	0.251815	0.0789331	1.05163	1.10274
LRRC59	7.41944	14	0.286956	1	0.148389	0.0409937	3.6198	0.0186754	0.0789392	1.85591	1.10271
USP8	108.412	48	8.17652	7	2.16824	1.16807	1.85625	0.101311	0.0790011	0.892393	1.10237
SCAPER	172.319	50	12.8848	6	3.44638	1.84069	1.87233	0.0645612	0.0790318	0.904835	1.1022
SLC10A7	41.7676	43	2.10422	2	0.835353	0.300602	2.77893	0.600268	0.0790773	1.47453	1.10195
CD99L2	172.382	50	11.61	6	3.44763	1.65857	2.07868	0.0612977	0.0791045	1.05566	1.1018
MGAT5B	66.8106	33	3.57639	3	1.33621	0.510913	2.61535	0.00610101	0.0791634	1.387	1.10148
NAA25	247.833	50	17.4498	5	4.95665	2.49283	1.98837	0.362227	0.0792826	0.991585	1.10082
UBXN8	7.66346	16	0.286956	1	0.153269	0.0409937	3.73885	0.0108613	0.0793923	1.90259	1.10022
CEP162	76.6653	48	4.43085	4	1.53331	0.632978	2.42237	0.115267	0.079406	1.27642	1.10015
PHF3	97.358	49	7.33579	6	1.94716	1.04797	1.85803	0.181508	0.0798072	0.893774	1.09796
RC3H1	72.9468	46	16.3574	7	1.45894	2.33677	0.624339	0.220242	0.0798368	-0.679597	1.0978
WDR74	171.115	43	9.52759	4	3.4223	1.36108	2.51439	0.00250439	0.0802739	1.33021	1.09543
RNF13	2768.97	50	244.428	7	55.3793	34.9183	1.58597	0.929704	0.0804239	0.665362	1.09461
SMIM16	6.08148	12	0.217621	1	0.12163	0.0310888	3.91233	0.0054587	0.0806355	1.96803	1.09347
CEP290	85.3033	49	5.67885	6	1.70607	0.811264	2.10297	0.073992	0.0808002	1.07243	1.09259
ACBD6	296.051	50	27.6378	7	5.92101	3.94825	1.49965	0.0154954	0.0808232	0.58463	1.09246
ITGBL1	9.07863	12	0.286956	1	0.181573	0.0409937	4.42928	0.00126744	0.0808332	2.14707	1.09241
TRPM7	330.183	50	28.2654	7	6.60366	4.03792	1.63541	0.0566508	0.080858	0.709654	1.09228
AREL1	45.5673	45	2.65849	3	0.911346	0.379784	2.39964	0.308573	0.0808656	1.26282	1.09224
CCPG1	11.9118	17	0.508493	2	0.238237	0.0726418	3.27961	0.000985649	0.0813893	1.71352	1.08943
MSRB3	17.5818	21	0.692705	1	0.351636	0.0989578	3.55339	0.0229973	0.0815645	1.8292	1.0885
WDR37	379.449	50	29.6749	7	7.58899	4.23928	1.79016	0.120453	0.0818105	0.84009	1.08719
HERPUD2	245.577	50	14.5573	6	4.91154	2.07961	2.36176	0.0718159	0.0819259	1.23986	1.08658
CUL2	169.032	49	12.0806	6	3.38063	1.7258	1.95887	0.515545	0.082056	0.970024	1.08589
SNX2	44.0346	42	2.75127	3	0.880692	0.393039	2.24072	0.635705	0.0821703	1.16396	1.08529
TIPIN	84.674	48	6.25648	4	1.69348	0.893783	1.89473	0.667509	0.0822924	0.921995	1.08464
SNX6	572.18	50	35.4836	7	11.4436	5.06909	2.25752	0.000239983	0.0824099	1.17474	1.08402
RP11-823P9.1	82.5053	49	5.36084	5	1.65011	0.765835	2.15465	0.0788495	0.0827227	1.10745	1.08238
CYP20A1	30.3455	38	1.23495	2	0.60691	0.176421	3.44013	0.0771277	0.0829371	1.78246	1.08125
THADA	284.437	50	22.9235	6	5.68875	3.27479	1.73713	0.609707	0.0829448	0.796709	1.08121
STX12	32.3336	42	1.62445	2	0.646672	0.232064	2.78661	0.71527	0.0832972	1.47851	1.07937
TBC1D7	4.042	10	2.63503	4	0.0808399	0.376433	0.214753	0.00291439	0.0834324	-2.21925	1.07867
GLRB	18.163	21	0.673104	1	0.363259	0.0961578	3.77774	0.00798473	0.0835215	1.91752	1.0782
HIBADH	914.487	50	68.189	7	18.2897	9.74129	1.87755	0.195518	0.0836862	0.90885	1.07735
AP2B1	148.653	49	11.989	7	2.97305	1.71271	1.73587	0.0804979	0.0837425	0.795661	1.07705
RYK	937.351	50	77.414	7	18.747	11.0591	1.69516	0.305029	0.0840445	0.761423	1.07549
NFAT5	412.197	50	39.1559	7	8.24394	5.5937	1.47379	0.0332627	0.0845518	0.559531	1.07288
CLEC16A	512.237	50	41.1419	7	10.2447	5.87741	1.74307	0.130659	0.0846279	0.801631	1.07249
ERC1	723.484	50	158.588	7	14.4697	22.6554	0.638684	0.200007	0.084629	-0.646825	1.07248
CRBN	37.7295	40	2.9817	5	0.75459	0.425957	1.77152	0.019396	0.0847859	0.824985	1.07168
BIVM	25.9642	32	1.31466	2	0.519284	0.187809	2.76496	0.0128873	0.084824	1.46726	1.07148
PSMA7	327.92	50	26.4328	6	6.5584	3.77611	1.73681	0.130138	0.0849285	0.796444	1.07095
STAM	136.867	50	11.0079	5	2.73734	1.57255	1.7407	0.188028	0.0852331	0.799667	1.06939
CDK4	12.1376	13	0.256886	1	0.242752	0.0366981	6.61483	3.36719e-05	0.0852412	2.7257	1.06935
MYSM1	81.2336	50	7.20482	5	1.62467	1.02926	1.57849	0.365687	0.0852531	0.658541	1.06929
DNMT3B	66.6076	44	3.59033	3	1.33215	0.512905	2.59727	0.168469	0.0852958	1.377	1.06907
CAST	121.834	49	7.0132	4	2.43668	1.00189	2.43209	0.0848155	0.0853091	1.2822	1.069
ALG8	213.608	49	16.0534	6	4.27216	2.29334	1.86286	0.00066689	0.085314	0.897517	1.06898
MCFD2	29.305	35	2.08801	4	0.586099	0.298287	1.96489	0.0344533	0.0854632	0.974445	1.06822
USP9Y	50.5835	16	1.78755	3	1.01167	0.255364	3.96168	2.53666e-05	0.085535	1.98611	1.06786
MAP7	121.571	40	4.82299	2	2.43141	0.688999	3.52891	0.247871	0.0856334	1.81922	1.06736
TRIM9	6.63986	13	0.256886	1	0.132797	0.0366981	3.61864	0.0139203	0.086064	1.85545	1.06518
EMSY	291.806	50	25.41	7	5.83612	3.63001	1.60775	0.480707	0.0864681	0.685039	1.06314
SKP2	6.29669	15	2.07001	4	0.125934	0.295716	0.425861	0.251766	0.086656	-1.23154	1.0622
USP32	212.427	50	21.0142	7	4.24854	3.00203	1.41522	0.568145	0.0867211	0.501029	1.06188
NAMPT	9.65024	19	0.508493	2	0.193005	0.0726418	2.65694	0.017193	0.0867378	1.40976	1.06179
MAP3K7	37.6835	39	8.82555	6	0.75367	1.26079	0.597775	0.553798	0.0868505	-0.742325	1.06123
KDM4B	270.019	50	20.4652	7	5.40038	2.92361	1.84716	0.180966	0.0870884	0.885312	1.06004
TNFRSF21	2344.89	50	153.966	7	46.8978	21.9952	2.13219	0.125055	0.0870923	1.09233	1.06002
ARIH1	260.502	50	18.7638	6	5.21005	2.68054	1.94366	0.517792	0.0873334	0.958774	1.05882
C10orf88	10.9167	20	3.24582	6	0.218334	0.463688	0.470865	0.699019	0.0876074	-1.08661	1.05746
FAN1	12.9273	24	5.89048	5	0.258546	0.841498	0.307245	0.000527641	0.0876954	-1.70254	1.05702
PHACTR2	118.761	49	9.1874	6	2.37522	1.31249	1.80971	0.0087033	0.0877493	0.855758	1.05676
SUN2	5.66947	11	0.217621	1	0.113389	0.0310888	3.64728	0.0114878	0.087828	1.86682	1.05637
TMEM135	243.032	48	19.8711	7	4.86065	2.83873	1.71226	0.00327848	0.0880518	0.775905	1.05526
YAP1	170.082	49	14.0752	6	3.40165	2.01074	1.69174	0.00801218	0.0881684	0.758505	1.05469
GSTCD	22.2741	30	7.89506	6	0.445481	1.12787	0.394977	0.0419565	0.0881816	-1.34016	1.05462
ZNF573	4.7646	11	2.51916	4	0.0952921	0.35988	0.264788	0.0496009	0.0883945	-1.91709	1.05357
CYP26B1	32.8637	22	0.655106	1	0.657275	0.0935866	7.02317	1.9885e-05	0.0885341	2.81212	1.05289
ADARB2	2.48168	3	10.2508	3	0.0496336	1.4644	0.0338935	2.79891e-20	0.0889323	-4.88285	1.05094
PTGR2	27.0451	42	1.66363	2	0.540902	0.237662	2.27594	0.987511	0.0889824	1.18646	1.0507
C5orf42	344.541	50	27.1386	7	6.89082	3.87694	1.77738	0.244271	0.0891444	0.829755	1.04991
ZC3H8	8.78186	19	0.469228	2	0.175637	0.0670325	2.62018	0.0214604	0.0891727	1.38966	1.04977
ANKRD12	1443.59	50	111.917	7	28.8719	15.9882	1.80583	0.291446	0.0891888	0.852659	1.04969
DNAJC10	23.0819	35	0.942062	2	0.461639	0.13458	3.43021	0.102105	0.0893731	1.7783	1.04879
ZNF438	9.38806	16	0.388474	1	0.187761	0.0554963	3.38331	0.0406912	0.089614	1.75844	1.04762
OSTF1	5.83568	13	2.07531	3	0.116714	0.296473	0.393673	0.0749425	0.0897107	-1.34493	1.04716
BRE	116.081	46	4.52103	4	2.32162	0.645862	3.59461	3.18616e-05	0.08977	1.84584	1.04687
PYGB	5.52443	13	0.217621	1	0.110489	0.0310888	3.55397	0.0158396	0.0902564	1.82943	1.04452
PTCD3	50.5926	45	3.68697	5	1.01185	0.52671	1.92108	0.19986	0.0902717	0.941919	1.04445
C16orf62	235.538	47	21.7542	7	4.71076	3.10775	1.51581	0.047063	0.090354	0.60009	1.04405
MTDH	271.485	50	22.6457	7	5.4297	3.2351	1.67837	0.756271	0.0904531	0.747063	1.04358
MTMR12	74.8221	41	6.69314	6	1.49644	0.956162	1.56505	0.032046	0.0905334	0.646208	1.04319
HDAC9	297.142	41	12.2372	4	5.94283	1.74817	3.39946	3.24807e-05	0.0905639	1.76531	1.04304
PLTP	22.303	17	8.37797	4	0.44606	1.19685	0.372694	0.1403	0.0905787	-1.42394	1.04297
ENGASE	143.089	47	9.94763	5	2.86178	1.42109	2.01379	0.166395	0.0906473	1.00991	1.04265
RHOF	154.727	47	8.55839	4	3.09455	1.22263	2.53106	0.383556	0.0908131	1.33974	1.04185
UBR5	708.947	49	59.8979	6	14.1789	8.55685	1.65703	0.832352	0.0908589	0.728598	1.04163
ENOX2	24.103	34	0.890726	2	0.48206	0.127247	3.78839	0.0671094	0.0912065	1.92159	1.03997
INPP5F	14.8287	20	0.604644	1	0.296574	0.0863777	3.43345	0.0278022	0.0914341	1.77966	1.03889
MAST4	32.1522	27	1.31021	1	0.643045	0.187173	3.43556	0.0273889	0.0915086	1.78055	1.03854
RP11-674E16.5	21.357	34	1.01529	2	0.427139	0.145041	2.94495	0.350251	0.0915846	1.55825	1.03818
RP11-29G8.3	109.544	48	6.85438	4	2.19088	0.979197	2.23743	0.270949	0.091639	1.16184	1.03792
AFF4	237.361	50	20.5023	6	4.74721	2.9289	1.62082	0.298002	0.0918307	0.696721	1.03701
LGR4	66.4751	39	3.03013	3	1.3295	0.432876	3.07133	0.0796639	0.0918337	1.61886	1.037
FHOD3	114.946	39	7.26334	4	2.29891	1.03762	2.21556	0.000968323	0.0920345	1.14767	1.03605
MAP2	25.7801	18	1.05064	2	0.515603	0.150091	3.43527	0.00119049	0.0926796	1.78042	1.03302
ERBIN	1195.11	50	95.9071	7	23.9022	13.701	1.74456	0.191967	0.0929295	0.802862	1.03185
TLN2	12.768	17	0.513773	1	0.255361	0.0733961	3.47921	0.0203869	0.0930161	1.79876	1.03144
TBC1D20	11.2829	18	0.474508	1	0.225658	0.0677868	3.32893	0.0478865	0.0932823	1.73506	1.0302
C11orf80	179.266	49	13.3234	6	3.58532	1.90334	1.88369	0.116973	0.0933061	0.913565	1.03009
TRAF7	5.83365	11	0.217621	1	0.116673	0.0310888	3.7529	0.00626086	0.0934121	1.908	1.0296
TXNRD1	2942.8	50	37.4493	7	58.8559	5.34991	11.0013	1.28867e-11	0.094262	3.4596	1.02566
LYST	135.492	50	8.2806	4	2.70983	1.18294	2.29076	0.87549	0.0943229	1.19582	1.02538
OSBPL6	7.17181	15	0.286956	1	0.143436	0.0409937	3.49898	0.0172582	0.0947317	1.80694	1.0235
C11orf54	49.7541	43	2.69989	2	0.995082	0.385698	2.57995	0.710631	0.0950338	1.36734	1.02212
AC093642.5	20.9421	33	0.822265	2	0.418842	0.117466	3.56563	0.0861496	0.0952163	1.83416	1.02129
TMEM164	26.4017	37	1.21167	2	0.528033	0.173095	3.05054	0.137407	0.0957375	1.60906	1.01892
RHOT1	150.7	47	11.3454	7	3.014	1.62077	1.8596	0.121887	0.0963454	0.894996	1.01617
DPF3	7.65657	8	0.217621	1	0.153131	0.0310888	4.92562	0.000305721	0.0965014	2.3003	1.01547
EXOSC10	68.8052	46	15.1093	7	1.3761	2.15847	0.637538	0.649705	0.0966774	-0.649417	1.01468
LRBA	998.853	50	78.7771	7	19.9771	11.2539	1.77513	0.126469	0.0967139	0.827923	1.01451
AP1G1	115.385	46	8.59003	4	2.3077	1.22715	1.88054	0.44896	0.0967757	0.911148	1.01423
MKL1	71.8335	42	3.61925	3	1.43667	0.517036	2.77866	0.201362	0.0972468	1.47439	1.01212
DYM	304.581	50	30.3209	7	6.09161	4.33156	1.40633	0.0240057	0.0975163	0.491937	1.01092
ITGB8	22.0387	23	0.925948	2	0.440774	0.132278	3.33218	0.00142955	0.0980078	1.73646	1.00874
MTR	280.899	50	26.6607	7	5.61798	3.80867	1.47505	0.611404	0.0984609	0.560764	1.00674
AMOTL1	232.28	45	13.4723	6	4.64561	1.92461	2.41379	0.0197332	0.0986782	1.2713	1.00578
USP3	1026.56	50	78.7501	7	20.5313	11.25	1.825	0.0976365	0.0987836	0.867895	1.00532
GART	64.0151	47	4.91073	5	1.2803	0.701533	1.82501	0.557379	0.0989182	0.867901	1.00472
RNF170	39.3457	41	2.41896	3	0.786914	0.345566	2.27717	0.762962	0.098943	1.18724	1.00462
CFAP44	70.7776	44	4.1861	4	1.41555	0.598015	2.36709	0.209722	0.0989714	1.24311	1.00449
NLN	102.252	48	8.2956	6	2.04503	1.18509	1.72564	0.114289	0.0991631	0.787132	1.00365
INTS4	73.6352	44	4.99631	4	1.4727	0.713759	2.06331	0.00798066	0.0991897	1.04496	1.00353
NAB1	709.37	50	69.8485	7	14.1874	9.97836	1.42182	0.0429956	0.0993035	0.507736	1.00304
ZNF335	11.1549	21	3.14489	4	0.223097	0.449269	0.496578	0.265961	0.0993048	-1.00991	1.00303
CCT7	12.4558	24	0.503213	1	0.249116	0.0718875	3.46536	0.0169769	0.0994133	1.793	1.00256
UNG	24.1454	30	5.93356	6	0.482908	0.847652	0.569701	0.461175	0.0995014	-0.811724	1.00217
NDUFA9	5.40977	13	0.217621	1	0.108195	0.0310888	3.48021	0.0156467	0.0996809	1.79917	1.00139
RBFOX2	54.087	45	3.09675	3	1.08174	0.442393	2.4452	0.336217	0.0997698	1.28995	1.001
LAMA4	12.4645	10	0.256886	1	0.24929	0.0366981	6.793	2.03897e-05	0.0997794	2.76405	1.00096
ADD1	50.0927	45	3.51588	4	1.00185	0.502269	1.99466	0.378456	0.0998122	0.99614	1.00082
LACE1	8.64539	15	2.82873	4	0.172908	0.404104	0.427879	0.539601	0.100062	-1.22472	0.999731
ZNF217	6.03914	13	0.251606	1	0.120783	0.0359438	3.36033	0.0285316	0.100259	1.7486	0.998876
FRA10AC1	21.7196	25	0.892026	2	0.434393	0.127432	3.40881	0.000440967	0.100514	1.76927	0.997772
DOCK9	56.3275	43	3.19684	2	1.12655	0.456692	2.46676	0.849566	0.100637	1.30262	0.997243
WDR11	27.4418	40	1.48853	3	0.548836	0.212647	2.58097	0.172183	0.100957	1.36791	0.995864
ARHGAP5	2171.35	50	166.298	7	43.4271	23.7568	1.82798	0.224962	0.101003	0.870253	0.995664
BARD1	1297.96	50	111.234	7	25.9592	15.8905	1.63363	0.0909887	0.101272	0.70808	0.994509
KIF15	146.936	49	12.0733	6	2.93872	1.72476	1.70384	0.368427	0.101352	0.768793	0.994167
SRGAP2B	6.23901	12	0.256886	1	0.12478	0.0366981	3.40019	0.0218659	0.101416	1.76561	0.993894
YTHDF1	51.0665	42	2.73812	3	1.02133	0.39116	2.61103	0.14892	0.101447	1.38462	0.993762
KIAA0922	27.8967	33	1.23613	2	0.557934	0.17659	3.15948	0.12479	0.101524	1.65969	0.993432
MEIS3	218.08	30	12.9556	3	4.3616	1.8508	2.3566	0.0140881	0.101813	1.23671	0.992196
KTN1	342.96	50	28.4786	7	6.85921	4.06838	1.68598	0.656764	0.101877	0.753588	0.991925
ERCC3	16.7173	31	4.39711	5	0.334345	0.628159	0.532262	0.350415	0.101909	-0.90979	0.991786
UEVLD	37.6828	46	2.358	2	0.753656	0.336857	2.23732	0.943282	0.101962	1.16177	0.991563
PSEN1	520.814	49	49.42	7	10.4163	7.06	1.47539	0.483329	0.102631	0.5611	0.988724
ARID1A	57.5816	43	2.95314	3	1.15163	0.421877	2.72978	0.33753	0.10274	1.44878	0.98826
SH3D19	57.3091	46	3.66371	4	1.14618	0.523388	2.18993	0.285376	0.10293	1.13089	0.987457
LRRC37A	30.7968	42	1.84609	3	0.615936	0.263727	2.33551	0.354682	0.103805	1.22374	0.983782
TMCC3	12.3833	20	0.503213	1	0.247667	0.0718875	3.4452	0.0157455	0.104099	1.78459	0.982554
TMTC4	36.102	37	15.4928	6	0.722039	2.21325	0.326235	7.26559e-06	0.104118	-1.61602	0.982472
LONRF1	9.37914	17	5.21851	5	0.187583	0.745502	0.25162	0.00180062	0.104232	-1.99068	0.981999
SRI	6.03201	12	0.251606	1	0.12064	0.0359438	3.35636	0.024621	0.104371	1.7469	0.98142
DGAT1	2.38234	5	1.26826	3	0.0476468	0.18118	0.262981	0.101181	0.104554	-1.92697	0.980659
PGM5P2	11.0652	17	0.474508	1	0.221305	0.0677868	3.26471	0.0421584	0.104599	1.70696	0.980474
MTG2	6.22197	13	3.65637	4	0.124439	0.522339	0.238235	0.00977714	0.104704	-2.06954	0.980037
SMAD3	32.8401	37	1.79293	2	0.656801	0.256132	2.56431	0.995042	0.104872	1.35857	0.979339
CCZ1B	101.158	48	7.40087	5	2.02316	1.05727	1.91358	0.278745	0.105002	0.936273	0.978801
TMEM62	51.2257	38	4.12546	5	1.02451	0.589351	1.73838	0.0457563	0.105132	0.797742	0.978263
FIG4	43.7528	44	2.5215	3	0.875056	0.360214	2.42926	0.175803	0.105315	1.28052	0.97751
RAD23B	503.144	50	45.6165	7	10.0629	6.51664	1.54418	0.192744	0.105594	0.626844	0.976361
SNHG4	25.1122	29	10.6279	6	0.502245	1.51827	0.330801	0.00179313	0.105713	-1.59597	0.975871
TMBIM6	17.2195	12	0.503552	1	0.34439	0.0719359	4.78746	0.00032344	0.10583	2.25926	0.975392
PDLIM1	7.79701	11	0.251606	1	0.15594	0.0359438	4.33845	0.000835695	0.105836	2.11718	0.975365
GORASP2	5.10054	12	0.217621	1	0.102011	0.0310888	3.28128	0.0358522	0.105869	1.71426	0.97523
CAPN2	54.2144	42	2.88946	3	1.08429	0.41278	2.6268	0.0988416	0.106028	1.3933	0.974578
APBA2	5.98375	14	0.256886	1	0.119675	0.0366981	3.26107	0.0403699	0.106072	1.70535	0.9744
CCDC90B	54.399	45	3.45142	4	1.08798	0.49306	2.20659	0.13454	0.106148	1.14182	0.974089
NCOR2	375.607	50	28.4961	7	7.51214	4.07087	1.84534	0.279649	0.106356	0.883886	0.973238
GFM2	94.7738	48	7.25829	4	1.89548	1.0369	1.82802	0.714742	0.106401	0.870286	0.973055
CASC3	25.419	27	1.51986	3	0.50838	0.217124	2.34143	0.0137789	0.106405	1.22739	0.973037
ELP3	207.017	50	15.8916	6	4.14033	2.27023	1.82375	0.138162	0.106465	0.866908	0.972792
FAM117A	5.02729	9	2.0303	3	0.100546	0.290043	0.346659	0.250815	0.106967	-1.52841	0.97075
MAP4K5	108.396	49	9.5975	6	2.16793	1.37107	1.58119	0.262777	0.107059	0.661014	0.970377
RBBP4	11.504	26	2.99247	4	0.23008	0.427496	0.538203	0.155533	0.107245	-0.893778	0.969622
ALDH3A2	63.8501	41	15.2967	6	1.277	2.18525	0.584374	0.536834	0.107603	-0.775036	0.968175
FAM49B	161.878	49	11.0394	3	3.23756	1.57706	2.05291	0.819306	0.108041	1.03767	0.966411
KDM8	18.5117	26	5.31222	4	0.370235	0.758889	0.487864	0.363957	0.108104	-1.03545	0.966159
MEG8	9.0609	8	0.256886	1	0.181218	0.0366981	4.93808	0.000231514	0.108389	2.30395	0.965015
PLCH2	1.47558	5	1.97001	3	0.0295116	0.28143	0.104863	2.1554e-09	0.108824	-3.25342	0.963277
TRDMT1	13.5365	21	0.726114	2	0.27073	0.103731	2.60994	0.0217677	0.109232	1.38401	0.961649
GRAMD1B	101.091	27	6.65755	4	2.02183	0.951078	2.12583	0.0207675	0.109281	1.08803	0.961455
EXTL3	78.9341	45	4.62397	3	1.57868	0.660566	2.38989	0.160601	0.109285	1.25695	0.961438
FOCAD	673.656	49	53.3308	7	13.4731	7.61869	1.76843	0.185437	0.109376	0.822468	0.961077
KLHL5	224.872	47	16.461	7	4.49745	2.35157	1.91253	0.0141774	0.109496	0.935481	0.960601
RGPD5	15.7636	27	5.86215	6	0.315271	0.83745	0.376466	0.0146341	0.109713	-1.40941	0.959741
SLC25A17	18.5138	30	1.04052	2	0.370275	0.148646	2.49098	0.0457156	0.110403	1.31671	0.957018
NCBP1	41.2808	40	2.52032	2	0.825617	0.360046	2.29309	0.903949	0.110469	1.19729	0.956759
AIMP1	13.616	23	4.01428	5	0.27232	0.573468	0.474864	0.318988	0.110512	-1.07441	0.956592
NUP153	467.465	50	47.8671	7	9.3493	6.83816	1.36722	0.034226	0.110608	0.45125	0.956213
LRP6	448.999	50	103.184	7	8.97997	14.7406	0.609199	0.213514	0.110683	-0.715014	0.95592
ANKRD13A	47.0255	43	2.82834	3	0.940511	0.404049	2.32771	0.823007	0.110927	1.21891	0.954962
DPP3	17.5047	27	1.12162	3	0.350094	0.160231	2.18493	0.0231634	0.111229	1.12759	0.953781
MID1	305.919	48	17.7241	5	6.11837	2.53201	2.41641	0.000466254	0.111253	1.27287	0.95369
SCAF4	19.5601	30	5.09377	5	0.391202	0.727681	0.5376	0.122745	0.111431	-0.895394	0.952995
SGCE	52.5329	38	4.22537	5	1.05066	0.603625	1.74058	0.0173004	0.111619	0.799568	0.952262
ACOX1	36.1097	36	1.81055	2	0.722193	0.258649	2.79217	0.272646	0.111719	1.48139	0.951873
SLC25A24	151.855	50	11.0575	3	3.03711	1.57964	1.92266	0.538844	0.111866	0.943107	0.951301
SHTN1	84.4703	46	5.79877	5	1.68941	0.828396	2.03937	0.102465	0.111914	1.02812	0.951116
PHACTR4	63.6056	47	5.02206	6	1.27211	0.717438	1.77313	0.174511	0.112187	0.826301	0.950056
PATJ	460.704	49	25.4506	6	9.21409	3.6358	2.53427	0.18317	0.112912	1.34157	0.947261
ERP44	77.8588	45	5.5614	4	1.55718	0.794486	1.95998	0.221518	0.112928	0.970839	0.947199
TAF4	78.7398	42	5.04738	3	1.5748	0.721055	2.18402	0.925454	0.112934	1.12698	0.947174
UBR3	236.619	50	18.2208	6	4.73238	2.60296	1.81807	0.279583	0.113081	0.862411	0.946612
NUP133	135.111	49	10.5984	7	2.70221	1.51406	1.78474	0.921601	0.113081	0.835718	0.946609
YPEL2	83.0898	43	4.77768	4	1.6618	0.682526	2.43477	0.101573	0.113272	1.28379	0.945876
PLEK2	6.36982	11	0.256886	1	0.127396	0.0366981	3.47147	0.0101322	0.113629	1.79555	0.944511
STAG3L5P-PVRIG2P-PILRB	8.43922	17	5.00002	4	0.168784	0.714288	0.236297	4.73403e-05	0.113685	-2.08132	0.944297
XPNPEP3	131.928	50	9.52247	6	2.63855	1.36035	1.93961	0.080245	0.114404	0.955764	0.941558
ELF2	273.729	50	24.9538	7	5.47457	3.56483	1.53572	0.108124	0.114526	0.618913	0.941098
FLVCR1	236.48	49	24.4055	7	4.7296	3.4865	1.35655	0.0213422	0.114774	0.439939	0.940157
PRIM1	33.1455	42	7.68313	6	0.662911	1.09759	0.603969	0.211723	0.114834	-0.727453	0.93993
RAB11FIP5	74.1932	42	4.45633	4	1.48386	0.636619	2.33085	0.0681695	0.115109	1.22086	0.938891
SPARC	6.48095	7	0.217621	1	0.129619	0.0310888	4.16932	0.00101648	0.115241	2.05981	0.938394
CCDC126	134.427	43	8.01654	3	2.68854	1.14522	2.34762	0.286813	0.115301	1.2312	0.938168
DCTN1	6.38824	9	0.251606	1	0.127765	0.0359438	3.55458	0.00681994	0.115323	1.82968	0.938084
AKAP12	89.2877	20	2.50544	1	1.78575	0.357919	4.98926	0.000183298	0.115422	2.31883	0.937712
KCNH1	78.7214	22	3.45314	1	1.57443	0.493306	3.19158	0.0417297	0.115656	1.67427	0.936832
RQCD1	38.3473	41	2.17602	3	0.766947	0.31086	2.46718	0.119026	0.115711	1.30286	0.936627
SHKBP1	265.816	49	24.9879	6	5.31633	3.56969	1.48929	0.036784	0.116165	0.574629	0.934924
PDE3A	82.9484	20	3.42356	1	1.65897	0.48908	3.39202	0.0133554	0.116292	1.76214	0.93445
CHD2	602.337	50	53.9217	7	12.0467	7.7031	1.56388	0.274364	0.116557	0.645132	0.933461
SLC17A5	26.1869	36	1.34781	2	0.523738	0.192544	2.72009	0.223392	0.117047	1.44366	0.931638
ADK	199.77	50	15.7838	5	3.99541	2.25483	1.77194	0.669884	0.117083	0.825326	0.931507
PAN3	341.499	50	28.9533	6	6.82999	4.13618	1.65128	0.205662	0.117799	0.723583	0.928859
RP11-848G14.2	2.39316	7	1.83755	4	0.0478632	0.262508	0.182331	0.000432777	0.11816	-2.45537	0.92753
AHCYL2	18.785	28	0.790169	1	0.3757	0.112881	3.32828	0.390389	0.118308	1.73478	0.926985
SDF4	531.786	48	43.4174	5	10.6357	6.20249	1.71475	0.273475	0.118465	0.777998	0.92641
GUF1	5.96214	13	0.251606	1	0.119243	0.0359438	3.31748	0.0178267	0.118688	1.73009	0.925592
SDHB	14.4375	27	3.85288	4	0.28875	0.550412	0.524607	0.0606553	0.118728	-0.93069	0.925446
GOLGA1	115.161	48	23.4644	7	2.30323	3.35205	0.68711	0.149739	0.118823	-0.541388	0.9251
ANXA1	11.4278	18	0.618066	2	0.228557	0.0882951	2.58855	0.0170988	0.119104	1.37215	0.924073
USP53	94.3562	44	5.26056	4	1.88712	0.751508	2.51112	0.375705	0.119165	1.32833	0.923851
IFNGR2	199.947	49	12.1538	5	3.99894	1.73625	2.3032	0.139787	0.119175	1.20364	0.923814
ZNF12	32.7611	33	1.70186	3	0.655221	0.243123	2.69502	0.0584809	0.119604	1.4303	0.922254
DDX60	41.8195	36	2.28485	2	0.83639	0.326407	2.56241	0.0117166	0.119642	1.3575	0.922115
BRWD1	770.79	50	63.7613	7	15.4158	9.10876	1.69241	0.279914	0.119705	0.759083	0.921888
ATF7IP2	26.1181	33	1.07532	2	0.522362	0.153618	3.40041	0.0981548	0.119895	1.76571	0.9212
TMEM138	181.316	50	37.9017	7	3.62633	5.41452	0.669741	0.214974	0.12001	-0.578325	0.920782
C20orf194	50.5747	42	3.02684	4	1.01149	0.432405	2.33923	0.253619	0.120024	1.22603	0.920733
CTD-2207O23.3	38.452	39	2.0596	2	0.76904	0.294228	2.61375	0.283866	0.120302	1.38612	0.919728
SRGAP1	123.044	49	7.18434	4	2.46088	1.02633	2.39774	0.146671	0.120312	1.26167	0.919691
EGFEM1P	2.47244	5	2.85831	4	0.0494488	0.408329	0.1211	3.10082e-05	0.120648	-3.04573	0.91848
LPP	108.102	50	7.82684	5	2.16205	1.11812	1.93365	0.72018	0.121311	0.951324	0.916099
ABCC1	595.312	50	48.1742	7	11.9062	6.88202	1.73005	0.310174	0.121409	0.790813	0.915749
NEB	7.50187	9	0.256886	1	0.150037	0.0366981	4.08843	0.00108018	0.121771	2.03155	0.914456
WDR1	174.778	39	9.81193	4	3.49555	1.4017	2.49379	0.072045	0.121986	1.31834	0.913691
SSH2	247.399	50	25.8154	7	4.94797	3.68792	1.34167	0.0216173	0.122336	0.424032	0.912447
PSMC3	42.1088	39	10.1909	6	0.842175	1.45584	0.578482	0.605394	0.122343	-0.789656	0.912422
ROCK2	75.1452	46	5.05386	3	1.5029	0.72198	2.08164	0.570417	0.12244	1.05772	0.912076
PANK3	96.7319	49	19.6125	7	1.93464	2.80178	0.690502	0.163472	0.122478	-0.534282	0.911943
CCDC137	23.1143	31	6.02736	6	0.462285	0.861052	0.536884	0.132161	0.122536	-0.897317	0.911737
LSM14B	25.9687	35	1.31021	1	0.519373	0.187173	2.77483	0.963688	0.122647	1.4724	0.911344
ARAP1	19.5771	24	1.09035	2	0.391543	0.155764	2.51369	0.0188287	0.122672	1.32981	0.911256
DOCK8	15.8556	19	0.669061	1	0.317113	0.0955802	3.31777	0.015456	0.122898	1.73021	0.910457
CCDC144B	8.34015	15	2.78266	3	0.166803	0.397523	0.419606	0.0622838	0.122931	-1.25289	0.91034
ZNF142	50.5986	42	10.8331	7	1.01197	1.54758	0.653905	0.266901	0.123073	-0.612848	0.909836
GTF2H2C	26.7304	35	1.33833	2	0.534608	0.19119	2.79622	0.178655	0.123093	1.48348	0.909768
RPF2	8.3185	16	2.64437	4	0.16637	0.377768	0.440403	0.250192	0.123109	-1.1831	0.909709
PAPD4	202.282	50	17.1207	6	4.04564	2.44581	1.65411	0.437791	0.123133	0.726055	0.909626
COG6	46.2207	44	2.83165	2	0.924415	0.404521	2.28521	0.736682	0.123356	1.19232	0.908841
NAA60	9.86736	15	0.504577	2	0.197347	0.0720825	2.7378	0.00372645	0.123653	1.45302	0.907794
WDR5	24.5951	36	0.870486	1	0.491902	0.124355	3.95562	0.126561	0.123691	1.9839	0.907663
ST3GAL1	4.79873	8	1.87714	3	0.0959746	0.268163	0.357896	0.207453	0.123729	-1.48239	0.907529
EIF3E	92.9298	46	20.8095	6	1.8586	2.97278	0.625205	0.940547	0.123782	-0.677599	0.907343
TBL1X	29.2521	33	1.44695	2	0.585043	0.206707	2.8303	0.154629	0.123908	1.50096	0.906901
FTO	292.357	50	21.7387	6	5.84714	3.10553	1.88281	0.299296	0.124188	0.912889	0.905921
ERBB2	865.296	50	17.639	7	17.3059	2.51985	6.86783	3.03163e-11	0.124504	2.77985	0.904818
PALLD	146.378	46	9.08638	5	2.92756	1.29805	2.25534	0.122857	0.12508	1.17335	0.902813
ZBTB7A	8.23994	9	0.217621	1	0.164799	0.0310888	5.30091	9.04752e-05	0.125216	2.40624	0.902339
STK33	115.289	32	31.6912	6	2.30578	4.52731	0.509305	0.180088	0.125849	-0.973397	0.900151
IFT88	56.182	41	3.75048	4	1.12364	0.535782	2.09719	0.268394	0.125959	1.06846	0.899772
ATP13A3	126.178	50	26.3384	6	2.52356	3.76263	0.67069	0.130289	0.126151	-0.576283	0.89911
SPICE1	123.563	49	10.5636	6	2.47127	1.50909	1.63759	0.534286	0.126349	0.711574	0.898428
SASH1	23.3846	23	7.21807	5	0.467692	1.03115	0.453563	0.0815696	0.126408	-1.14063	0.898227
MALT1	69.5732	43	33.5668	7	1.39146	4.79526	0.290175	8.6046e-10	0.126903	-1.78501	0.896528
UGP2	380.729	50	32.5577	5	7.61459	4.6511	1.63716	0.406944	0.127243	0.711195	0.895367
GS1-124K5.12	35.934	36	1.59226	2	0.71868	0.227466	3.15951	0.066968	0.127266	1.6597	0.895288
TGDS	0.719152	1	1.45314	3	0.014383	0.207592	0.0692852	9.44407e-06	0.127298	-3.85131	0.895178
CSNK1D	11.9563	25	3.13835	4	0.239125	0.448335	0.533362	0.0669144	0.127451	-0.906814	0.894656
CCDC149	27.4833	29	0.902247	1	0.549666	0.128892	4.26453	0.0737685	0.127536	2.09239	0.894366
WASF2	12.0087	26	0.435243	1	0.240174	0.0621776	3.86272	0.14023	0.127554	1.94962	0.894305
ATP5G2	7.97861	9	0.251606	1	0.159572	0.0359438	4.4395	0.000418598	0.127642	2.1504	0.894006
VDAC1	35.2894	43	12.2302	5	0.705788	1.74717	0.40396	1.31221e-05	0.127646	-1.30771	0.893992
UBE2K	694.06	50	59.5493	7	13.8812	8.50704	1.63173	0.0515823	0.127681	0.706404	0.893873
BRIX1	56.7371	43	3.60599	3	1.13474	0.515142	2.20278	0.340823	0.127745	1.13932	0.893657
AQR	142.5	50	12.6987	7	2.85	1.81411	1.57102	0.467114	0.127846	0.651704	0.893314
NFIB	75.9962	43	6.06849	6	1.51992	0.866927	1.75323	0.00161287	0.127965	0.810016	0.89291
RP11-864I4.1	6.70466	18	2.91995	4	0.134093	0.417136	0.321462	0.00388097	0.127966	-1.63728	0.892905
BMPR1B	46.6701	31	3.09441	4	0.933402	0.442058	2.11149	0.00430841	0.128137	1.07826	0.892326
SIK3	40.8773	43	2.4225	2	0.817547	0.346071	2.36237	0.516691	0.128502	1.24023	0.89109
SMARCA5	1374.57	50	138.353	7	27.4914	19.7647	1.39093	0.604987	0.128555	0.476054	0.89091
FNBP1L	30.6876	33	2.49275	5	0.613752	0.356108	1.7235	0.0342031	0.128751	0.785341	0.89025
AHSA1	89.2014	45	5.55706	3	1.78403	0.793866	2.24727	0.588161	0.129152	1.16817	0.8889
TNRC18	80.9229	47	5.81539	5	1.61846	0.83077	1.94814	0.197238	0.129248	0.962099	0.888577
NAV2	75.3785	45	4.07134	4	1.50757	0.581621	2.59202	0.104218	0.129324	1.37407	0.88832
NR5A2	20.2533	8	0.573911	1	0.405067	0.0819873	4.9406	0.00015121	0.129977	2.30469	0.886134
TAF15	64.9185	47	4.60126	5	1.29837	0.657322	1.97524	0.454654	0.130383	0.982028	0.884779
SEC24D	19.8779	30	0.890726	2	0.397558	0.127247	3.12431	0.145646	0.130764	1.64354	0.883512
ZDHHC3	50.2562	39	2.72211	3	1.00512	0.388872	2.58471	0.0892965	0.130816	1.37	0.883339
CPSF2	123.917	48	9.04462	5	2.47834	1.29209	1.91809	0.398678	0.131769	0.939669	0.880186
MBOAT2	1262.15	50	112.839	7	25.243	16.1199	1.56596	0.0257439	0.131984	0.647047	0.879479
EFEMP1	93.6456	39	4.41286	2	1.87291	0.630408	2.97095	0.108959	0.132091	1.57092	0.879127
VARS	8.5961	18	4.78602	4	0.171922	0.683717	0.251452	4.98046e-05	0.132132	-1.99164	0.878991
TAOK1	330.662	50	28.0612	7	6.61324	4.00874	1.6497	0.489529	0.132268	0.722207	0.878545
CTTNBP2NL	5.16865	12	0.217621	1	0.103373	0.0310888	3.32509	0.0111295	0.132341	1.73339	0.878305
IDE	243.623	50	22.9469	7	4.87245	3.27813	1.48635	0.055273	0.13251	0.571775	0.877753
FLNB	192.204	50	13.6107	6	3.84407	1.94438	1.97701	0.100695	0.132589	0.983323	0.877492
LCOR	71.1591	47	5.50161	3	1.42318	0.785944	1.81079	0.174751	0.132826	0.856623	0.876718
IREB2	58.5091	46	3.42188	3	1.17018	0.48884	2.39379	0.30818	0.132959	1.2593	0.876282
LACTB2	68.17	37	3.12489	2	1.3634	0.446413	3.05412	0.111433	0.132985	1.61076	0.876198
RGL3	76.7106	42	4.14861	3	1.53421	0.592659	2.58869	0.273919	0.133231	1.37222	0.875395
IFNAR1	20.7123	30	0.96006	2	0.414245	0.137151	3.02035	0.138715	0.133251	1.59472	0.875328
EXOC4	154.983	48	12.3965	5	3.09966	1.77093	1.7503	0.143555	0.133409	0.807603	0.874814
RP11-37B2.1	118.668	40	8.84902	5	2.37335	1.26415	1.87744	0.00390596	0.133424	0.908765	0.874765
ZFP91	4.97395	11	0.217621	1	0.099479	0.0310888	3.19983	0.0203383	0.13346	1.678	0.874649
DERA	29.4455	40	1.57854	2	0.58891	0.225505	2.61152	0.245792	0.133476	1.38489	0.874598
TXNDC16	131.399	48	9.11892	6	2.62797	1.3027	2.01732	0.193122	0.133597	1.01244	0.874202
ADGRA3	129.488	46	35.4788	7	2.58976	5.06839	0.510962	0.00528052	0.133773	-0.968712	0.873632
THSD7A	32.3248	23	1.72025	2	0.646495	0.24575	2.6307	0.00589679	0.133994	1.39545	0.872915
EFCAB2	100.443	46	6.95323	5	2.00886	0.993319	2.02237	0.205616	0.134184	1.01605	0.872298
TNPO2	91.7105	43	19.8035	7	1.83421	2.82907	0.648343	0.180868	0.134458	-0.625171	0.871413
DHCR24	12.2759	21	3.55173	4	0.245518	0.507389	0.483884	0.143787	0.134532	-1.04727	0.871176
RIN3	2.03292	4	1.09035	2	0.0406585	0.155764	0.261026	0.074405	0.134636	-1.93773	0.870838
DAGLB	297.175	49	25.1916	7	5.9435	3.5988	1.65152	0.0743949	0.134702	0.723797	0.870628
TMEM126B	2.63182	8	2.09911	4	0.0526363	0.299872	0.175529	4.76098e-06	0.13479	-2.51022	0.870342
FAM76B	5.57057	12	0.251606	1	0.111411	0.0359438	3.0996	0.0351555	0.135061	1.63208	0.86947
CCNY	185.611	48	11.4102	5	3.71223	1.63003	2.2774	0.56917	0.135344	1.18739	0.86856
PIEZO2	20.5588	9	0.673104	1	0.411176	0.0961578	4.27606	0.000514843	0.135521	2.09628	0.867994
NADK	5.4984	10	0.217621	1	0.109968	0.0310888	3.53722	0.00423761	0.135643	1.82262	0.867603
PLEKHA8	24.0093	32	0.979085	2	0.480186	0.139869	3.43311	0.0549554	0.135703	1.77951	0.867409
KLHL28	14.9404	31	3.72282	5	0.298807	0.531831	0.561847	0.174636	0.135736	-0.831751	0.867306
MAP3K4	578.731	50	128.188	6	11.5746	18.3126	0.632057	0.0597884	0.135908	-0.661874	0.866755
ZNF652	243.59	50	21.0896	6	4.8718	3.01279	1.61704	0.131083	0.136075	0.693352	0.866221
ARFGEF3	44.4525	34	2.94755	3	0.88905	0.421078	2.11136	0.0370286	0.136179	1.07818	0.865889
RABL6	3.5616	7	1.39356	3	0.071232	0.19908	0.357805	0.324051	0.136272	-1.48275	0.865593
TTLL5	175.589	50	14.951	5	3.51178	2.13586	1.6442	0.648718	0.13628	0.717385	0.865568
NCOA2	422.222	50	34.7619	6	8.44444	4.96599	1.70046	0.675763	0.136299	0.765922	0.865508
PIP5K1A	202.241	50	14.3876	6	4.04483	2.05537	1.96794	0.0314477	0.136375	0.976684	0.865265
RIC1	61.7911	42	3.97714	5	1.23582	0.568163	2.17512	0.083772	0.136486	1.12109	0.864912
ENOPH1	64.5179	45	5.00728	5	1.29036	0.715325	1.80388	0.228879	0.136582	0.851101	0.864608
VPS8	146.097	50	12.6489	7	2.92194	1.80698	1.61703	0.704559	0.136655	0.693346	0.864376
FUT10	35.6221	34	8.52628	6	0.712442	1.21804	0.584908	0.329202	0.136685	-0.773717	0.864279
ZNF710	25.3821	28	1.85177	4	0.507642	0.264538	1.91897	0.0330294	0.136895	0.940336	0.863611
EZH1	138.712	49	11.926	7	2.77424	1.70371	1.62835	0.988445	0.137025	0.703408	0.863201
ASPH	12578.6	50	807.442	7	251.573	115.349	2.18097	0.0821706	0.137178	1.12497	0.862715
B3GLCT	59.1549	43	3.10334	3	1.1831	0.443334	2.66864	0.112303	0.137436	1.4161	0.861901
IPO8	86.3917	48	5.28529	4	1.72783	0.755041	2.2884	0.124367	0.137593	1.19434	0.861405
CECR7	102.969	31	3.75739	2	2.05937	0.53677	3.8366	0.0925545	0.137741	1.93983	0.860936
HERC2P3	26.2182	33	6.24966	4	0.524364	0.892808	0.58732	0.0790694	0.138019	-0.767782	0.860061
NR3C2	57.7128	13	0.760438	2	1.15426	0.108634	10.6252	4.61572e-08	0.138091	3.40941	0.859836
IQCE	28.5952	35	1.02755	1	0.571905	0.146792	3.89602	0.116024	0.138177	1.962	0.859565
SPG21	138.606	48	11.2352	6	2.77212	1.60502	1.72715	0.256076	0.138257	0.788394	0.859314
KMT5B	85.7875	47	7.0837	6	1.71575	1.01196	1.69548	0.379051	0.138357	0.761691	0.858999
MSH3	433.666	50	37.5626	7	8.67332	5.36609	1.61632	0.0674694	0.13855	0.692714	0.858394
AKAP9	136.158	49	9.65805	5	2.72316	1.37972	1.9737	0.102742	0.138592	0.980903	0.858262
AARS	217.21	50	18.967	6	4.34421	2.70957	1.60328	0.419806	0.139049	0.68103	0.856833
HOMER1	520.273	50	37.1364	6	10.4055	5.3052	1.96137	0.100102	0.139117	0.97186	0.85662
AC004166.7	13.1086	22	3.71719	4	0.262171	0.531027	0.493706	0.149683	0.139413	-1.01828	0.855696
C6orf89	16.4379	30	0.652864	1	0.328758	0.0932663	3.52494	0.216569	0.139547	1.8176	0.855278
ZC3HAV1	79.7215	46	5.35839	3	1.59443	0.765484	2.0829	0.336257	0.139666	1.0586	0.854909
DBP	62.5529	39	3.02337	3	1.25106	0.431911	2.89657	0.0759589	0.139901	1.53434	0.854179
LASP1	5.78965	12	0.256886	1	0.115793	0.0366981	3.15529	0.0210048	0.140092	1.65777	0.853587
STK38L	3.83489	10	2.71823	4	0.0766978	0.388319	0.197512	4.90762e-06	0.140317	-2.33999	0.852889
TTI1	5.50715	12	0.251606	1	0.110143	0.0359438	3.06431	0.0364511	0.140359	1.61556	0.852759
SLC27A4	16.8123	22	4.81626	5	0.336245	0.688038	0.488702	0.807522	0.140818	-1.03297	0.851343
TMEM116	155.73	48	9.5772	5	3.11459	1.36817	2.27646	0.0878743	0.140928	1.18679	0.851004
PDK1	278.815	50	19.9408	7	5.57629	2.84869	1.9575	0.071954	0.140948	0.969009	0.850942
POLK	58.7845	46	4.43955	5	1.17569	0.634222	1.85375	0.129682	0.141269	0.890448	0.849952
NUDT21	3.10141	7	1.26893	3	0.0620281	0.181276	0.342175	0.342585	0.141413	-1.54719	0.849509
SERPINB1	17.574	28	0.673104	1	0.35148	0.0961578	3.65525	0.168093	0.141538	1.86997	0.849126
PPA1	21.6676	30	0.949016	1	0.433351	0.135574	3.19643	0.383523	0.141853	1.67646	0.84816
DCAF5	122.404	48	10.4723	6	2.44808	1.49605	1.63636	0.183957	0.142084	0.710492	0.847454
TROVE2	71.0985	46	5.20699	3	1.42197	0.743856	1.91162	0.668267	0.142427	0.934797	0.846407
NLK	124.24	49	10.2188	5	2.48479	1.45982	1.70212	0.795042	0.142475	0.767333	0.846262
RABGGTA	142.206	47	10.195	6	2.84412	1.45642	1.95281	0.0879393	0.143044	0.965551	0.844531
PHC3	1837.58	50	185.185	7	36.7517	26.455	1.38921	0.359929	0.143386	0.474269	0.843493
KHDRBS3	22.145	15	0.573911	1	0.442899	0.0819873	5.40204	5.56223e-05	0.143932	2.4335	0.841842
VEZT	179.826	49	17.1608	7	3.59651	2.45155	1.46704	0.182634	0.14408	0.552904	0.841397
RP11-73M18.2	243.218	50	21.4759	7	4.86437	3.06799	1.58552	0.359531	0.144272	0.664961	0.840819
RAPH1	75.4835	48	4.88434	5	1.50967	0.697764	2.16358	0.0594301	0.144337	1.11342	0.840621
FANCD2	70.3295	49	14.6056	7	1.40659	2.08651	0.674134	0.0927528	0.144429	-0.568892	0.840346
ZGRF1	179.5	49	36.3913	7	3.59	5.19876	0.690549	0.375961	0.144449	-0.534185	0.840286
CEP57	51.1968	39	12.0517	5	1.02394	1.72167	0.594733	0.240337	0.144822	-0.749687	0.839166
ZNF720	37.3132	44	2.50363	3	0.746264	0.357661	2.08651	0.536232	0.144915	1.06109	0.838888
RP11-498P14.2	5.6244	14	0.256886	1	0.112488	0.0366981	3.06523	0.0305138	0.145142	1.61599	0.838207
SHCBP1	9.39885	22	3.99886	4	0.187977	0.571266	0.329053	0.000654714	0.145373	-1.60361	0.837515
MEI1	37.0428	10	0.692705	1	0.740855	0.0989578	7.48658	4.46274e-06	0.145519	2.90431	0.837079
SYNRG	125.8	50	10.3825	5	2.51601	1.48322	1.69632	0.632402	0.145907	0.762408	0.835923
KYNU	95.4356	30	4.84377	2	1.90871	0.691967	2.75839	0.0352965	0.146242	1.46382	0.834928
CYLD	16.3059	25	0.573911	1	0.326118	0.0819873	3.97766	0.0910597	0.146678	1.99192	0.833634
UBE2R2	201.992	50	18.5223	6	4.03983	2.64604	1.52675	0.203291	0.146899	0.610461	0.832981
GTF2I	300.379	50	25.6156	6	6.00759	3.65937	1.6417	0.79345	0.147058	0.715189	0.832512
KIAA0753	30.7384	35	7.56091	5	0.614768	1.08013	0.569161	0.618107	0.14708	-0.813092	0.832448
ACSF3	95.7781	47	7.49675	5	1.91556	1.07096	1.78863	0.271062	0.147093	0.838857	0.832407
CYHR1	5.8137	10	0.251606	1	0.116274	0.0359438	3.23488	0.0111565	0.147254	1.69371	0.831934
KDM2A	97.4709	48	7.2564	5	1.94942	1.03663	1.88054	0.549191	0.147284	0.911144	0.831844
ZRANB1	13.0127	23	0.435243	1	0.260254	0.0621776	4.18565	0.0643494	0.147365	2.06545	0.831606
AKR1E2	239.37	42	12.8825	5	4.7874	1.84036	2.60135	0.0925434	0.147494	1.37926	0.831225
NOL10	229.342	50	20.1632	7	4.58684	2.88046	1.5924	0.228959	0.147496	0.6712	0.831221
GPR89A	222.694	50	19.9238	7	4.45388	2.84626	1.56482	0.107218	0.147565	0.645996	0.831016
AL078471.5	34.9584	14	0.939007	1	0.699167	0.134144	5.21207	7.01097e-05	0.147705	2.38186	0.830605
IAH1	25.8477	7	0.763681	1	0.516954	0.109097	4.73847	0.000157598	0.148052	2.24442	0.829586
THG1L	2.58302	6	2.45139	4	0.0516603	0.350198	0.147518	9.4097e-07	0.148148	-2.76104	0.829304
KIF27	21.8821	33	1.21927	2	0.437643	0.174182	2.51257	0.275482	0.1484	1.32916	0.828565
ZFC3H1	116.579	48	10.0714	6	2.33158	1.43877	1.62054	0.912487	0.148803	0.696474	0.82739
CSE1L	462.907	50	45.1502	7	9.25814	6.45003	1.43536	0.744889	0.149008	0.521417	0.82679
FSTL5	10.326	8	0.388474	1	0.20652	0.0554963	3.72133	0.0016893	0.149022	1.89582	0.826748
ZNF141	1.55154	4	2.17378	3	0.0310308	0.31054	0.0999252	7.8007e-09	0.14912	-3.32301	0.826465
TVP23B	18.1749	26	4.97424	4	0.363499	0.710606	0.511534	0.112344	0.149141	-0.967098	0.826402
GRB10	378.57	49	24.9868	3	7.57139	3.56954	2.12111	0.303016	0.149233	1.08482	0.826135
CACNB4	7.94204	10	3.24334	3	0.158841	0.463334	0.342821	0.383409	0.149663	-1.54447	0.824886
DCTD	21.7495	22	9.67546	5	0.434989	1.38221	0.314706	0.00178786	0.149803	-1.66792	0.824479
ARL1	48.2783	40	3.04907	3	0.965566	0.435581	2.21673	0.398872	0.150321	1.14843	0.822981
UBXN4	117.844	50	10.8494	6	2.35689	1.54991	1.52066	0.994837	0.150341	0.6047	0.822922
MCC	30.494	29	2.05854	3	0.609881	0.294077	2.07388	0.00999963	0.150806	1.05233	0.821583
ATXN10	1936.34	50	162.03	7	38.7268	23.1472	1.67307	0.214362	0.151101	0.742495	0.820732
OGT	36.3357	39	2.29875	4	0.726714	0.328393	2.21294	0.0922871	0.151151	1.14597	0.820589
CTD-2323K18.1	2.87692	8	1.90033	3	0.0575384	0.271475	0.211947	0.0030263	0.151396	-2.23823	0.819884
PBLD	3.98094	13	2.53038	3	0.0796188	0.361483	0.220256	7.16688e-07	0.1516	-2.18275	0.819299
DDX19B	19.1066	36	1.02057	2	0.382131	0.145795	2.62101	0.367619	0.151652	1.39012	0.819152
RANBP9	606.612	50	47.2144	7	12.1322	6.74492	1.79872	0.0708521	0.151711	0.846973	0.818984
ADRBK2	76.9985	44	5.46303	4	1.53997	0.780432	1.97323	0.409193	0.151816	0.980557	0.818683
EIF3D	98.2875	48	8.43906	6	1.96575	1.20558	1.63054	0.711619	0.151834	0.705353	0.81863
CEPT1	92.864	46	7.49583	5	1.85728	1.07083	1.73442	0.201927	0.152062	0.794457	0.81798
CLSTN3	6.14012	10	0.256886	1	0.122802	0.0366981	3.34629	0.00591954	0.152382	1.74256	0.817066
RPL4	3.12777	8	2.15742	3	0.0625554	0.308203	0.202968	0.000146998	0.152444	-2.30067	0.81689
C2CD5	124.625	50	25.6794	7	2.4925	3.66849	0.679434	0.191934	0.152475	-0.557594	0.8168
UFL1	2.7188	9	1.92521	3	0.054376	0.27503	0.197709	6.32034e-06	0.152522	-2.33855	0.816668
TM9SF3	317.762	50	29.2942	7	6.35525	4.18488	1.51862	0.119284	0.152775	0.60276	0.815947
FCHO2	758.274	50	69.9721	6	15.1655	9.99602	1.51715	0.363198	0.152848	0.601366	0.815742
ATP2B4	97.2444	46	6.5333	4	1.94489	0.933329	2.08382	0.198907	0.152975	1.05923	0.815379
ZNFX1	109.393	49	8.76078	5	2.18785	1.25154	1.74813	0.125793	0.153061	0.805811	0.815135
ZCWPW1	6.44097	12	2.12917	3	0.128819	0.304168	0.423514	0.152157	0.153707	-1.23952	0.813305
ZNF782	18.206	28	0.604644	1	0.36412	0.0863777	4.21544	0.056582	0.153736	2.07568	0.813223
NFYB	33.6834	38	2.17148	4	0.673668	0.310211	2.17165	0.106411	0.154095	1.11879	0.812212
NUMA1	5.50814	12	0.251606	1	0.110163	0.0359438	3.06486	0.0222079	0.15483	1.61582	0.810145
PLS3	28.7272	37	1.71645	4	0.574544	0.245208	2.34309	0.0518512	0.155048	1.22841	0.809533
PI4KAP1	17.5362	16	0.763681	1	0.350723	0.109097	3.21478	0.00989999	0.155181	1.68472	0.809162
COG2	113.767	49	8.08171	5	2.27534	1.15453	1.97079	0.363802	0.155277	0.978774	0.808893
SPAG9	449.477	50	45.5464	7	8.98955	6.50662	1.3816	0.150768	0.15554	0.466339	0.808158
SATB2	521.202	49	164.004	7	10.424	23.4291	0.444918	0.0430701	0.155629	-1.16839	0.807909
ABCE1	13.5781	25	0.474508	1	0.271562	0.0677868	4.00612	0.0776878	0.155661	2.00221	0.80782
NBPF9	5.65737	17	2.25918	4	0.113147	0.32274	0.350583	0.00827845	0.155982	-1.51217	0.806925
KIFAP3	28.0444	34	6.51969	5	0.560889	0.931385	0.602209	0.0610438	0.156253	-0.731663	0.806171
LTBP1	91.3702	37	3.54243	2	1.8274	0.506061	3.61103	0.08013	0.156256	1.85241	0.806162
CARS	17.0471	27	0.721173	2	0.340943	0.103025	3.30933	0.0527479	0.156327	1.72654	0.805967
BMS1P1	33.9008	37	7.64809	6	0.678016	1.09258	0.620561	0.485744	0.156602	-0.688354	0.805202
HNRNPUL1	79.8921	47	6.2506	4	1.59784	0.892943	1.78941	0.418641	0.156734	0.839484	0.804837
ITGB5	143.741	44	9.30473	5	2.87482	1.32925	2.16274	0.0182748	0.157096	1.11286	0.803835
KATNA1	71.4013	48	4.84367	4	1.42803	0.691953	2.06376	0.211711	0.157405	1.04528	0.802982
RBM26	77.9417	45	16.8758	5	1.55883	2.41083	0.646596	0.276328	0.157536	-0.629063	0.80262
ZSWIM6	424.105	49	37.5072	7	8.48209	5.35817	1.58302	0.0731549	0.157571	0.662679	0.802524
CTTN	221.488	49	16.6424	6	4.42977	2.37749	1.86321	0.0217556	0.157594	0.897791	0.802459
TFG	68.9466	46	5.75358	5	1.37893	0.821939	1.67766	0.613819	0.15767	0.746447	0.802252
YES1	61.545	45	4.87651	6	1.2309	0.696645	1.7669	0.0854864	0.157722	0.821218	0.802108
KIAA1671	37.6159	38	2.13772	2	0.752319	0.305388	2.46348	0.314461	0.157747	1.3007	0.802038
G3BP2	73.7978	45	5.43988	6	1.47596	0.777126	1.89925	0.136139	0.15778	0.925431	0.801948
KLHDC10	132.491	47	25.7485	7	2.64981	3.67835	0.720381	0.859324	0.157863	-0.473168	0.801719
METAP2	79.8172	45	6.74194	5	1.59634	0.963135	1.65745	0.516066	0.157994	0.728962	0.801359
CDC6	29.3664	37	1.0525	1	0.587328	0.150356	3.90624	0.0890006	0.15831	1.96578	0.800491
ANK2	12.1072	15	3.92635	4	0.242145	0.560907	0.431702	0.225693	0.158357	-1.21189	0.800364
RP11-613M10.9	35.9047	36	8.26529	5	0.718095	1.18076	0.608165	0.0543851	0.15839	-0.717465	0.800273
CFAP47	19.2323	8	0.583509	1	0.384645	0.0833584	4.61435	0.000166588	0.158459	2.20613	0.800083
NOL12	55.0961	42	3.82146	4	1.10192	0.545923	2.01845	0.227743	0.158477	1.01325	0.800034
BUB1B	92.6136	48	25.5673	6	1.85227	3.65247	0.507128	0.00032684	0.15886	-0.979577	0.798984
RP1-14N1.2	46.1295	21	2.25208	2	0.922589	0.321725	2.86763	0.00247727	0.159025	1.51986	0.798536
NEBL	33.9204	31	1.26723	1	0.678409	0.181033	3.74743	0.116167	0.159043	1.9059	0.798485
LARP4	793.112	50	70.9943	7	15.8622	10.142	1.56401	0.673362	0.159193	0.645248	0.798075
NBPF1	56.3391	47	4.90422	6	1.12678	0.700603	1.6083	0.0957712	0.159207	0.68554	0.798038
KARS	20.6823	28	0.942062	2	0.413646	0.13458	3.0736	0.0864522	0.159365	1.61993	0.797608
C14orf93	3.14155	6	1.31318	3	0.062831	0.187598	0.334924	0.343914	0.160029	-1.5781	0.795802
ZBTB41	21.6383	36	1.23291	3	0.432765	0.17613	2.45708	0.211268	0.16056	1.29694	0.794361
KIAA1370	44.0687	38	2.63304	3	0.881374	0.376149	2.34315	0.1397	0.160967	1.22845	0.793263
SMC2	8.79538	18	0.543842	2	0.175908	0.0776917	2.26417	0.0368438	0.161138	1.17898	0.792801
UTY	35.7029	14	1.63113	1	0.714058	0.233018	3.06438	0.0183584	0.161178	1.6156	0.792694
ARFGAP3	53.6566	40	4.29913	5	1.07313	0.614162	1.74731	0.25817	0.161233	0.805136	0.792546
ZNF3	59.5196	44	3.94576	3	1.19039	0.56368	2.11182	0.293768	0.161314	1.07849	0.792329
PPP6R1	55.0089	42	3.3322	2	1.10018	0.476028	2.31116	0.624501	0.161565	1.20862	0.791653
KLHL3	40.472	37	3.2676	4	0.80944	0.4668	1.73402	0.041992	0.161658	0.794118	0.791404
ABHD12	22.6977	34	1.11842	2	0.453954	0.159774	2.84123	0.0958264	0.161728	1.50651	0.791213
TXNRD3	114.236	44	6.83231	5	2.28472	0.976044	2.3408	0.0682219	0.161864	1.227	0.79085
HEATR5B	143.525	49	12.534	7	2.8705	1.79057	1.60313	0.0794407	0.161989	0.680888	0.790515
FAM20B	90.9569	48	19.0028	7	1.81914	2.71469	0.670109	0.0908679	0.162209	-0.577533	0.789925
BRD2	20.7019	30	5.03818	5	0.414038	0.71974	0.575261	0.597388	0.162345	-0.797711	0.78956
SEL1L3	119.446	45	6.13051	3	2.38892	0.875787	2.72774	0.343575	0.162431	1.4477	0.789331
ERICH1	48.9879	29	2.85518	3	0.979758	0.407882	2.40206	0.00520052	0.162635	1.26427	0.788787
RAP1GAP2	21.3497	31	1.12961	2	0.426994	0.161373	2.646	0.171916	0.162921	1.40381	0.788022
GHR	1.49766	4	2.87026	3	0.0299533	0.410038	0.07305	1.91683e-15	0.162947	-3.77497	0.787953
CAB39	64.8512	43	3.38505	4	1.29702	0.483578	2.68214	0.0686159	0.162998	1.42338	0.787817
RAPGEF6	200.578	50	38.6678	7	4.01156	5.52397	0.726209	0.0866485	0.163202	-0.461542	0.787276
PRMT5	177.05	48	14.7561	5	3.54099	2.10802	1.67977	0.680075	0.163342	0.748265	0.786902
PRPF40A	56.5344	46	4.15155	5	1.13069	0.593078	1.90647	0.190559	0.163835	0.930907	0.785593
SETDB1	130.204	49	12.0261	6	2.60408	1.71802	1.51574	0.0292136	0.16386	0.600025	0.785527
ZFHX3	163.795	50	16.5257	7	3.2759	2.36081	1.38762	0.0254929	0.163895	0.472608	0.785435
KCNMA1	38.8881	24	17.0778	4	0.777763	2.43968	0.318797	0.00991467	0.164386	-1.64929	0.784135
SH3RF1	68.195	47	4.63739	4	1.3639	0.662485	2.05876	0.23282	0.16454	1.04178	0.783729
PRKRIP1	97.7074	48	7.40741	5	1.95415	1.0582	1.84667	0.211815	0.164718	0.884926	0.78326
DDX1	17.0223	26	0.673104	1	0.340447	0.0961578	3.5405	0.157904	0.164741	1.82395	0.783198
PNN	634.523	50	50.0143	7	12.6905	7.1449	1.77616	0.15555	0.164817	0.828758	0.782999
EDRF1	32.3376	37	2.20165	4	0.646752	0.314521	2.05631	0.152622	0.165238	1.04005	0.781891
PROSC	551.605	50	143.086	7	11.0321	20.4408	0.539708	0.0372722	0.165328	-0.889748	0.781654
MROH3P	16.0657	14	0.655106	1	0.321314	0.0935866	3.43333	0.00312451	0.165371	1.77961	0.781539
ZNF707	78.7883	45	5.66404	5	1.57577	0.809148	1.94744	0.317206	0.1654	0.961579	0.781464
NRP1	59.5102	39	3.58328	2	1.1902	0.511897	2.32509	0.92108	0.165623	1.21728	0.780879
ZBTB38	71.9526	39	5.66498	4	1.43905	0.809283	1.77818	0.0449439	0.166042	0.830402	0.779782
TMCO4	31.6158	37	1.91423	2	0.632315	0.273461	2.31227	0.518186	0.166076	1.20931	0.779693
TM2D1	13.2803	24	4.86345	5	0.265605	0.694778	0.382288	0.0041509	0.166145	-1.38727	0.779512
TNPO3	1317.32	50	121.382	7	26.3463	17.3402	1.51938	0.18376	0.166157	0.603478	0.77948
PRIMPOL	46.3903	42	10.1824	6	0.927806	1.45463	0.637831	0.300828	0.166523	-0.648753	0.778526
CCNC	31.0966	37	10.5984	5	0.621933	1.51406	0.410771	0.00247346	0.166644	-1.28359	0.778209
POC1A	27.9561	34	1.66218	3	0.559121	0.237454	2.35465	0.103193	0.166844	1.23551	0.77769
BRCA1	204.572	50	19.8233	7	4.09145	2.8319	1.44477	0.330049	0.16694	0.530841	0.77744
SARNP	84.7644	47	6.92902	6	1.69529	0.98986	1.71265	0.132508	0.166956	0.776233	0.777397
RP11-552F3.12	5.21266	12	0.251606	1	0.104253	0.0359438	2.90045	0.0438722	0.167272	1.53628	0.776576
LONP2	278.334	50	24.5595	7	5.56667	3.50851	1.58662	0.109082	0.167319	0.665959	0.776454
NRG2	3.26392	4	1.5843	3	0.0652785	0.226329	0.288423	0.65753	0.167866	-1.79374	0.775037
CDYL	3979.06	50	379.439	7	79.5813	54.2055	1.46814	0.19398	0.16789	0.55399	0.774976
GDAP2	99.1243	48	8.60038	4	1.98249	1.22863	1.61358	0.568204	0.167969	0.690266	0.774772
BIRC6	1576.05	50	173.876	7	31.5211	24.8394	1.269	0.567376	0.16807	0.343687	0.774509
TBC1D22A	172.517	49	11.5396	5	3.45035	1.64852	2.093	0.0714684	0.168428	1.06557	0.773587
ARAP2	268.973	47	16.871	6	5.37947	2.41015	2.23201	0.0632174	0.168436	1.15834	0.773564
RAB1A	46.6938	43	3.36579	3	0.933876	0.480828	1.94223	0.930972	0.168543	0.957711	0.77329
NHEJ1	1.65494	5	1.30468	3	0.0330987	0.186383	0.177584	0.00027669	0.168559	-2.49342	0.773249
HDAC7	1.17764	4	0.508493	2	0.0235528	0.0726418	0.324232	0.0968194	0.169066	-1.6249	0.771944
C5orf24	1.5095	5	1.45053	3	0.03019	0.207219	0.145691	7.60434e-07	0.169115	-2.77901	0.771817
ORC1	24.6488	33	1.15216	2	0.492976	0.164594	2.99511	0.080992	0.169322	1.58261	0.771286
GRK4	27.6158	27	1.52088	2	0.552316	0.217268	2.5421	0.00643381	0.169454	1.34602	0.770947
ARSB	22.8628	31	10.2562	4	0.457256	1.46517	0.312085	1.8223e-05	0.169513	-1.67999	0.770797
TMEM63A	14.1275	25	0.513773	1	0.28255	0.0733961	3.84965	0.0857878	0.16952	1.94473	0.77078
RGS3	29.5179	30	1.68488	2	0.590359	0.240697	2.45271	0.505037	0.169604	1.29438	0.770565
MPP3	20.1565	35	1.2737	2	0.40313	0.181958	2.21551	0.538338	0.169608	1.14764	0.770553
FMR1	30.0452	43	2.17367	3	0.600904	0.310524	1.93513	0.509932	0.169982	0.952427	0.769598
C12orf4	14.7372	26	3.98806	4	0.294744	0.569723	0.517347	0.113644	0.170774	-0.950796	0.767578
WDR61	6.29551	12	0.286956	1	0.12591	0.0409937	3.07145	0.0132293	0.17142	1.61892	0.765938
MYO10	619.441	49	54.0324	5	12.3888	7.71891	1.605	0.717255	0.17158	0.682571	0.765533
EXT1	24.0545	33	1.20929	1	0.481089	0.172755	2.7848	0.635691	0.172019	1.47757	0.764424
GPR89B	179.837	50	15.4561	7	3.59675	2.20801	1.62895	0.0591655	0.172423	0.703944	0.763405
FBXO7	243.757	50	20.8567	6	4.87514	2.97953	1.63621	0.605534	0.172423	0.71036	0.763404
SCYL2	258.793	50	23.6304	6	5.17586	3.37576	1.53324	0.344959	0.172998	0.616584	0.761958
NAP1L4	70.0949	44	5.1875	5	1.4019	0.741072	1.89172	0.247001	0.173103	0.919696	0.761696
FBF1	17.9438	31	4.03356	5	0.358876	0.576223	0.622807	0.338212	0.173441	-0.683142	0.760849
CHST15	226.101	48	18.597	4	4.52203	2.65671	1.70212	0.240733	0.173461	0.76733	0.760797
PUS10	5.23068	11	0.251606	1	0.104614	0.0359438	2.91048	0.0326354	0.173895	1.54126	0.759712
YWHAE	242.946	48	48.5854	7	4.85891	6.94077	0.700054	0.0832025	0.173967	-0.514461	0.759534
RP11-342C20.3	1.84477	4	1.56543	3	0.0368954	0.223633	0.164982	0.00427463	0.174125	-2.59962	0.75914
HTT	444.351	50	44.8417	7	8.88703	6.40595	1.38731	0.446978	0.174302	0.472287	0.758697
PCYOX1	13.194	14	0.503552	1	0.26388	0.0719359	3.66826	0.00119768	0.174303	1.8751	0.758695
METTL25	11.8769	23	0.503552	1	0.237537	0.0719359	3.30207	0.223322	0.174325	1.72337	0.75864
SEPT7	43.2108	42	3.01897	4	0.864216	0.431282	2.00383	0.109842	0.174353	1.00276	0.75857
IGF2BP3	243.929	49	22.1858	4	4.87857	3.16941	1.53927	0.614706	0.174456	0.622247	0.758314
RNF214	104.082	49	20.4525	7	2.08164	2.92178	0.712455	0.783072	0.174997	-0.48913	0.75697
CYB5B	2.36502	7	1.71272	3	0.0473003	0.244674	0.193319	2.28871e-05	0.175198	-2.37094	0.75647
DLG2	5.02444	12	3.07961	3	0.100489	0.439944	0.228412	0.00023942	0.175582	-2.13029	0.755519
UNKL	15.8974	30	0.763681	1	0.317948	0.109097	2.91435	0.475334	0.17581	1.54317	0.754957
PPP1R12A	119.064	50	9.86283	5	2.38128	1.40898	1.69008	0.228841	0.175877	0.757091	0.754791
SRGAP2D	3.21948	8	1.16088	3	0.0643896	0.16584	0.388263	0.394184	0.175961	-1.3649	0.754584
ATAD2B	516.737	50	46.4691	6	10.3347	6.63844	1.5568	0.881411	0.176249	0.638585	0.753874
TSC2	71.2692	44	6.89604	6	1.42538	0.985148	1.44687	0.0432521	0.176257	0.532939	0.753854
SAMD3	2.1368	3	2.89823	3	0.042736	0.414033	0.103219	4.33903e-08	0.176299	-3.27622	0.75375
MCUR1	4.69669	10	0.217621	1	0.0939338	0.0310888	3.02147	0.0152065	0.176387	1.59525	0.753534
DOPEY2	360.255	50	23.445	6	7.20509	3.34928	2.15123	0.0652761	0.17639	1.10516	0.753526
RCAN3	129.557	46	10.0248	6	2.59115	1.43212	1.80931	0.260183	0.176512	0.855441	0.753225
GIGYF1	14.548	29	4.69984	5	0.29096	0.671406	0.433359	0.0308835	0.176677	-1.20636	0.75282
QTRT1	3.5975	10	1.9211	3	0.07195	0.274443	0.262167	0.000686927	0.176805	-1.93144	0.752505
GALNS	20.4377	30	0.815565	1	0.408753	0.116509	3.50833	0.14639	0.176869	1.81079	0.752349
TOP3A	80.2195	47	16.007	7	1.60439	2.28672	0.701612	0.714203	0.177296	-0.511254	0.751302
POT1	16.2332	30	0.962386	2	0.324664	0.137484	2.36147	0.351739	0.177457	1.23969	0.750907
RNF38	80.1619	48	6.50726	4	1.60324	0.929608	1.72464	0.616567	0.177577	0.786294	0.750614
DIAPH3	230.75	49	21.3893	7	4.61501	3.05561	1.51034	0.0100265	0.177579	0.594872	0.750609
EYA3	178.326	50	17.6242	7	3.56652	2.51774	1.41656	0.832689	0.178066	0.502388	0.749419
EXOC1	28.2151	39	1.97297	2	0.564302	0.281853	2.00212	0.95587	0.17818	1.00153	0.749141
CCDC18	465.41	50	43.0143	7	9.30821	6.14489	1.51479	0.195843	0.17819	0.599115	0.749117
TCP1	31.7252	40	9.27596	6	0.634504	1.32514	0.478821	0.0047212	0.17822	-1.06244	0.749043
EFR3A	193.899	50	16.3206	6	3.87797	2.33151	1.66329	0.86665	0.178435	0.734038	0.74852
STAT5B	25.7473	36	1.56932	2	0.514947	0.224189	2.29693	0.404203	0.178742	1.19971	0.747774
SLMAP	380.553	50	31.8285	6	7.61105	4.54692	1.67389	0.357668	0.178765	0.743206	0.747717
TRAF5	41.8816	38	2.50708	3	0.837632	0.358154	2.33875	0.141634	0.179145	1.22574	0.746796
LMTK2	328.453	50	27.8468	6	6.56905	3.97812	1.6513	0.00955589	0.179558	0.723598	0.745794
KIAA1958	174.048	47	35.4508	7	3.48096	5.0644	0.68734	0.984386	0.179697	-0.540905	0.745458
HEATR3	24.7454	38	5.76978	5	0.494908	0.824255	0.60043	0.0642366	0.180006	-0.735931	0.744713
NDFIP1	40.521	39	8.7965	5	0.81042	1.25664	0.644908	0.131741	0.180007	-0.632834	0.744711
OGDH	424.613	50	35.4618	6	8.49226	5.06597	1.67633	0.111363	0.180089	0.74531	0.744512
SPATA5L1	2.35801	7	2.31325	3	0.0471601	0.330464	0.142709	5.98668e-10	0.180244	-2.80885	0.744138
TRIP13	45.3706	39	2.89192	3	0.907411	0.413132	2.19642	0.178174	0.180953	1.13516	0.742433
POLR1A	57.7126	44	4.34492	4	1.15425	0.620703	1.85959	0.208459	0.18106	0.894983	0.742177
SGMS2	18.5046	22	0.673104	1	0.370092	0.0961578	3.8488	0.0749331	0.181137	1.94441	0.741993
MMP24	2.67312	6	1.11842	2	0.0534624	0.159774	0.334613	0.106187	0.181326	-1.57944	0.74154
RNF4	56.5806	43	12.3062	6	1.13161	1.75803	0.643683	0.545515	0.181438	-0.635579	0.741272
ATP11B	110.88	49	8.4472	5	2.21759	1.20674	1.83767	0.116415	0.181599	0.877875	0.740887
PARP2	21.3012	29	1.19568	2	0.426024	0.170812	2.49412	0.217978	0.181603	1.31853	0.740877
TRIP12	604.105	50	36.7374	7	12.0821	5.24821	2.30214	7.94993e-06	0.181642	1.20298	0.740783
EIF5	40.3811	42	8.56052	6	0.807623	1.22293	0.660399	0.194243	0.181912	-0.59859	0.740139
ZFYVE16	66.8584	45	6.98972	7	1.33717	0.998532	1.33913	0.0131636	0.182334	0.4213	0.739131
GS1-124K5.14	89.2876	49	7.95235	5	1.78575	1.13605	1.5719	0.854125	0.182738	0.652506	0.738172
DHX29	58.8845	43	5.00046	4	1.17769	0.714352	1.64861	0.884234	0.182941	0.721253	0.737688
DNAJC7	43.6674	42	9.66997	5	0.873347	1.38142	0.632208	0.123452	0.183276	-0.661528	0.736894
NT5C3A	52.8642	44	4.34844	4	1.05728	0.621206	1.70199	0.497396	0.183292	0.767218	0.736856
PIGX	14.318	28	0.763681	1	0.286359	0.109097	2.6248	0.795867	0.183435	1.39221	0.736518
LGMN	18.7223	34	1.07915	2	0.374446	0.154165	2.42887	0.252694	0.183462	1.28029	0.736453
VIM	0.246697	1	1.18815	2	0.00493394	0.169736	0.0290683	6.77007e-22	0.183506	-5.10441	0.736349
NOTCH3	48.4261	30	3.42541	4	0.968523	0.489344	1.97923	0.0104926	0.183637	0.984936	0.736039
PVT1	2254.26	50	105.463	7	45.0852	15.0662	2.99248	7.39864e-07	0.183746	1.58134	0.735783
ANKRD31	22.6367	23	1.5886	3	0.452735	0.226942	1.99493	0.0103332	0.18382	0.996339	0.735608
APBB2	296.92	50	29.0938	7	5.93839	4.15625	1.42879	0.0217462	0.184093	0.51479	0.734962
WRN	88.1588	49	7.08443	6	1.76318	1.01206	1.74216	0.160004	0.184484	0.80088	0.734041
CACUL1	209.279	50	19.6198	7	4.18558	2.80283	1.49334	0.795089	0.184854	0.578543	0.733171
MIR137HG	0.227166	1	1.3753	2	0.00454332	0.196472	0.0231245	1.66835e-26	0.184857	-5.43443	0.733163
NCAPH	64.6845	45	4.83747	5	1.29369	0.691067	1.87202	0.0879379	0.185179	0.904593	0.732408
HAUS1	34.735	38	11.0853	5	0.694699	1.58361	0.438681	0.0009617	0.185562	-1.18876	0.731512
CCT6B	8.15547	14	0.504577	2	0.163109	0.0720825	2.26282	0.0199491	0.185781	1.17812	0.730998
MPP6	2968.95	50	305.761	7	59.379	43.6802	1.3594	0.251482	0.185893	0.442975	0.730737
C7orf26	16.6859	26	0.763681	1	0.333718	0.109097	3.0589	0.32195	0.186062	1.61301	0.730342
TBC1D4	103.343	45	24.2896	7	2.06687	3.46995	0.595648	0.921088	0.186498	-0.747468	0.729327
RP11-302M6.4	0.183584	1	0.903996	2	0.00367168	0.129142	0.0284313	1.757e-22	0.186571	-5.13638	0.729156
SBNO2	110.678	48	6.80444	4	2.21356	0.972063	2.27718	0.29634	0.186788	1.18725	0.72865
TVP23C-CDRT4	42.9258	35	2.44007	3	0.858515	0.348581	2.46289	0.0581145	0.187286	1.30035	0.727495
ADGRG2	0.429836	1	1.57925	2	0.00859673	0.225607	0.038105	5.52199e-17	0.187377	-4.71388	0.727284
PUM1	928.227	50	92.4915	7	18.5645	13.2131	1.40501	0.14443	0.187627	0.490584	0.726704
RP4-625H18.2	26.8673	16	0.474508	1	0.537346	0.0677868	7.927	1.57238e-06	0.187754	2.98678	0.726411
DPYSL3	0.291262	1	1.04211	2	0.00582524	0.148873	0.0391288	1.58796e-16	0.187812	-4.67563	0.726276
XRN1	100.717	50	9.27043	5	2.01434	1.32435	1.521	0.515032	0.18784	0.605023	0.726211
NOL8	14.5446	27	0.692705	1	0.290893	0.0989578	2.93956	0.404426	0.187872	1.5556	0.726138
SGK3	34.6818	38	2.08883	2	0.693637	0.298404	2.32449	0.924747	0.1879	1.21691	0.726072
GIN1	60.1668	42	3.63203	3	1.20334	0.518862	2.31919	0.0873276	0.188262	1.21362	0.725237
RP11-16N10.2	29.0822	30	2.56617	5	0.581644	0.366596	1.5866	0.00721556	0.18845	0.665943	0.724803
VAMP7	11.8428	28	4.43195	4	0.236856	0.633135	0.3741	4.61729e-05	0.18847	-1.41851	0.724759
SH3RF3	8.77718	9	5.32743	4	0.175544	0.761061	0.230656	0.0118244	0.188537	-2.11618	0.724604
SIRT3	16.9386	24	7.01119	4	0.338772	1.0016	0.338231	0.00207577	0.189224	-1.56392	0.723025
SARM1	0.170444	1	1.65997	2	0.00340888	0.237138	0.0143751	1.47004e-36	0.189293	-6.12028	0.722866
RMDN2	17.4611	28	1.16193	3	0.349223	0.16599	2.10387	0.0243949	0.18938	1.07305	0.722665
STAM2	46.6587	41	2.87028	4	0.933175	0.41004	2.27581	0.0635779	0.189448	1.18638	0.722511
ZNF577	83.4687	40	5.86084	4	1.66937	0.837263	1.99385	0.0991638	0.18945	0.995555	0.722506
SLC7A11	54.3257	24	3.0302	2	1.08651	0.432886	2.50993	0.0230017	0.18952	1.32765	0.722344
SEC22A	61.6037	45	5.67297	6	1.23207	0.810424	1.52028	0.248514	0.189579	0.604339	0.72221
MMD	44.81	34	2.28456	2	0.8962	0.326365	2.746	0.203804	0.189687	1.45733	0.721962
CACHD1	23.5194	28	10.5666	4	0.470387	1.50951	0.311615	8.46827e-06	0.189859	-1.68216	0.72157
AC111200.10	10.8713	18	3.13151	4	0.217427	0.447358	0.486023	0.395024	0.190089	-1.0409	0.721042
CH17-431G21.1	5.84407	11	0.286956	1	0.116881	0.0409937	2.8512	0.0294314	0.190321	1.51157	0.720514
UVRAG	67.0228	44	4.57295	3	1.34046	0.653278	2.05189	0.460331	0.190383	1.03695	0.720372
ITSN2	88.542	47	7.69859	5	1.77084	1.0998	1.61015	0.536016	0.190462	0.687194	0.720191
TAF1B	28.1091	37	1.74217	3	0.562182	0.248881	2.25884	0.0971561	0.190779	1.17558	0.71947
LARP1	57.5314	45	4.68388	3	1.15063	0.669126	1.7196	0.683553	0.19084	0.782071	0.719331
RIMKLB	37.2234	31	18.6453	6	0.744467	2.66361	0.279496	1.01011e-06	0.191007	-1.8391	0.71895
PSMA3	20.221	32	1.39126	3	0.40442	0.198751	2.0348	0.344564	0.191011	1.02489	0.718941
ADPGK	93.0098	44	18.8286	7	1.8602	2.6898	0.691575	0.578061	0.191391	-0.532042	0.718079
PLEKHG4B	0.844119	3	2.43425	2	0.0168824	0.34775	0.0485474	4.51138e-22	0.191566	-4.36446	0.717683
FAM208A	564.2	50	65.4965	7	11.284	9.35664	1.20599	0.0223219	0.191591	0.270217	0.717626
ZNF783	5.20242	12	1.55041	3	0.104048	0.221487	0.469773	0.116044	0.191705	-1.08996	0.717366
HS2ST1	48.6359	37	2.53515	3	0.972718	0.362165	2.68585	0.0805174	0.191899	1.42538	0.716928
USP9X	107.351	48	10.0073	7	2.14701	1.42961	1.50181	0.195993	0.191917	0.586702	0.716886
ABHD17B	45.3243	44	12.4386	5	0.906485	1.77694	0.510137	0.0108299	0.192002	-0.971042	0.716693
BRD8	15.0574	28	3.47216	5	0.301149	0.496024	0.607126	0.934794	0.19205	-0.719933	0.716586
BMPR1A	24.0283	34	5.31169	5	0.480566	0.758813	0.633312	0.111833	0.1921	-0.659011	0.716473
ARHGAP42	43.5248	37	2.48385	3	0.870495	0.354836	2.45323	0.440977	0.192373	1.29469	0.715855
GSK3B	279.22	50	23.6652	7	5.5844	3.38075	1.65182	0.157236	0.192598	0.72406	0.715348
ADAMTS12	21.2973	9	16.3832	3	0.425945	2.34046	0.181992	0.00283455	0.192645	-2.45805	0.715243
ITGAM	7.73978	16	0.388474	1	0.154796	0.0554963	2.7893	0.0426898	0.192934	1.4799	0.714591
UBAP2	3165.17	50	347.139	7	63.3035	49.5913	1.2765	0.97491	0.19297	0.352196	0.71451
AHI1	125.897	49	10.6242	6	2.51795	1.51775	1.659	0.0930806	0.193129	0.730314	0.714153
ARHGEF26	39.039	36	2.9023	3	0.780779	0.414614	1.88315	0.0415199	0.193146	0.913146	0.714114
ADARB1	158.909	48	41.8924	6	3.17818	5.98463	0.531056	0.896535	0.193158	-0.913064	0.714087
RP11-235E17.2	3.70648	9	1.28479	3	0.0741297	0.183542	0.403884	0.0743335	0.193679	-1.30799	0.712917
RNF14	5.42941	9	1.94826	3	0.108588	0.278323	0.390152	0.633197	0.193695	-1.35789	0.712881
DLGAP5	37.9173	40	3.13837	4	0.758347	0.448338	1.69146	0.462073	0.193826	0.75827	0.712587
HNRNPUL2-BSCL2	38.3381	42	2.5851	4	0.766763	0.3693	2.07626	0.106327	0.193834	1.05399	0.712571
USP33	295.376	50	26.5351	7	5.90752	3.79073	1.55841	0.368188	0.19386	0.640079	0.712512
FUBP1	44.466	43	3.38341	4	0.889321	0.483344	1.83993	0.293186	0.193989	0.879653	0.712223
TARBP1	86.5409	47	17.8939	7	1.73082	2.55628	0.677086	0.23759	0.194083	-0.56259	0.712013
SPIDR	1099.98	50	92.7137	7	21.9996	13.2448	1.661	0.0919134	0.194193	0.73205	0.711767
SLC25A44	14.0071	25	0.503552	1	0.280143	0.0719359	3.89433	0.0592381	0.194402	1.96138	0.7113
IL27RA	36.9186	34	2.67592	3	0.738372	0.382274	1.93152	0.523289	0.194418	0.94974	0.711262
TMED5	1.82933	3	0.910326	2	0.0365865	0.130047	0.281334	0.0611021	0.194427	-1.82964	0.711244
ALCAM	15.8379	25	0.655106	1	0.316757	0.0935866	3.38464	0.153318	0.194503	1.759	0.711074
QSOX2	31.1378	41	6.49594	6	0.622755	0.927991	0.671079	0.737299	0.19457	-0.575445	0.710923
ACSL4	19.2132	28	4.95955	5	0.384265	0.708507	0.542358	0.419698	0.194594	-0.882682	0.71087
FBXW8	193.177	47	16.7612	7	3.86354	2.39445	1.61354	0.295088	0.19465	0.690226	0.710745
PNKD	8.49988	13	0.400444	1	0.169998	0.0572064	2.97166	0.0122911	0.195079	1.57127	0.709789
GALNT6	3.15087	7	1.17261	2	0.0630174	0.167516	0.376187	0.0670086	0.195108	-1.41048	0.709726
FHL2	20.9985	23	0.754819	1	0.419969	0.107831	3.89469	0.0586713	0.195175	1.96151	0.709577
ZCCHC10	8.89777	16	5.27659	3	0.177955	0.753799	0.236078	0.000127278	0.195248	-2.08266	0.709413
STK36	5.2672	11	0.256886	1	0.105344	0.0366981	2.87056	0.0223089	0.19535	1.52133	0.709188
OSBPL2	197.03	46	6.73663	5	3.94061	0.962376	4.09466	4.89854e-07	0.195363	2.03374	0.709158
TMEM50A	54.2061	44	4.51795	5	1.08412	0.645421	1.67971	0.465628	0.195507	0.748215	0.708838
CYR61	0.3276	1	1.14357	2	0.00655199	0.163367	0.040106	1.98236e-16	0.195522	-4.64004	0.708804
FGF12	20.0031	12	0.655106	1	0.400062	0.0935866	4.27478	0.000179297	0.195943	2.09585	0.707871
CAMLG	181.31	48	15.3186	5	3.62621	2.18837	1.65703	0.230278	0.196374	0.728603	0.706916
ZC3H6	102.896	47	8.80696	5	2.05793	1.25814	1.6357	0.89304	0.196791	0.709905	0.705995
MAST3	12.2074	23	3.00803	5	0.244148	0.429718	0.568158	0.385979	0.196923	-0.815635	0.705705
REPS1	420.285	50	34.598	7	8.40569	4.94257	1.70067	0.252324	0.197031	0.766106	0.705466
UHMK1	15.2916	30	0.890726	2	0.305831	0.127247	2.40345	0.438989	0.197107	1.26511	0.705299
ZBTB40	53.4856	42	3.83889	4	1.06971	0.548412	1.95056	0.126586	0.197249	0.96389	0.704986
UPF2	484.327	50	46.683	7	9.68654	6.66899	1.45247	0.233097	0.197407	0.538512	0.704638
STK40	101.224	48	9.263	6	2.02447	1.32329	1.52988	0.317855	0.197527	0.613423	0.704372
NPC1	35.8244	38	1.76523	1	0.716488	0.252176	2.84123	0.454113	0.197812	1.50651	0.703748
TTF2	4.51049	9	2.43446	3	0.0902098	0.347781	0.259387	0.00250217	0.197941	-1.94682	0.703464
FBL	5.17078	9	0.217621	1	0.103416	0.0310888	3.32646	0.00236172	0.198106	1.73399	0.703102
ARHGAP29	129.27	44	7.67013	3	2.58541	1.09573	2.35953	0.15494	0.198695	1.2385	0.701813
PTPRA	302.521	50	28.7916	6	6.05043	4.11309	1.47102	0.285094	0.199122	0.556815	0.70088
MITD1	473.994	50	44.6425	7	9.47987	6.3775	1.48646	0.0534506	0.199179	0.571877	0.700756
CCDC144C	6.83718	16	1.84572	3	0.136744	0.263674	0.518609	0.132095	0.199256	-0.947282	0.700588
POLA1	134.53	49	32.0965	6	2.6906	4.58521	0.5868	0.0112044	0.199493	-0.769059	0.700072
VPS4B	17.6248	25	0.85625	2	0.352496	0.122321	2.88172	0.0917922	0.1999	1.52693	0.699187
TARS2	92.5875	46	9.03124	7	1.85175	1.29018	1.43527	0.0148833	0.200248	0.521321	0.698431
ADIPOR1	1.3232	5	1.26826	3	0.0264641	0.18118	0.146065	4.17541e-08	0.200384	-2.77531	0.698137
FAM129A	5.67639	15	3.24502	4	0.113528	0.463574	0.244897	1.18664e-07	0.200408	-2.02976	0.698085
WDR91	1.60106	4	2.69308	3	0.0320212	0.384726	0.0832312	2.64121e-14	0.200796	-3.58673	0.697245
C12orf56	8.03325	11	0.400444	1	0.160665	0.0572064	2.80852	0.0289331	0.200861	1.48981	0.697104
PRKD1	29.7808	26	1.67343	2	0.595616	0.239062	2.49148	0.00248334	0.200889	1.317	0.697044
ANKRD27	94.7744	47	19.394	5	1.89549	2.77057	0.684151	0.416862	0.201223	-0.547613	0.696323
HECTD2	67.0399	37	20.059	6	1.3408	2.86557	0.467899	0.0165919	0.201239	-1.09573	0.696288
MRPS30	0.570633	1	1.36046	2	0.0114127	0.194351	0.0587219	2.34628e-10	0.20128	-4.08996	0.696198
RELA	2.46134	9	3.01271	4	0.0492268	0.430387	0.114378	3.28089e-16	0.201974	-3.12812	0.694704
YTHDF2	169.779	48	34.8385	6	3.39558	4.97693	0.682264	0.0555692	0.202234	-0.551597	0.694146
ITPK1	11.7171	20	4.80478	4	0.234342	0.686397	0.341409	0.0012622	0.202384	-1.55043	0.693824
CIAO1	0.412829	2	0.892026	2	0.00825657	0.127432	0.0647918	3.69955e-14	0.20254	-3.94804	0.69349
RP11-210L7.3	0.269605	1	1.39977	2	0.0053921	0.199967	0.026965	2.51498e-24	0.202634	-5.21277	0.693288
PDE7B	75.9175	16	0.896216	1	1.51835	0.128031	11.8592	8.14207e-08	0.202678	3.56794	0.693193
DCAF8	63.0645	43	5.1094	4	1.26129	0.729914	1.728	0.809798	0.202724	0.789102	0.693096
ETFA	970.842	50	95.2415	7	19.4168	13.6059	1.42709	0.283991	0.202792	0.513072	0.692949
DENND4A	199.35	49	18.556	7	3.987	2.65085	1.50405	0.691705	0.202809	0.588849	0.692912
CUTC	4.48658	10	0.217621	1	0.0897315	0.0310888	2.8863	0.0164865	0.202836	1.52922	0.692854
RCCD1	6.97617	15	2.56529	4	0.139523	0.36647	0.380722	0.046655	0.20296	-1.39319	0.692589
GOLGA3	104.475	47	9.62981	6	2.0895	1.37569	1.51888	0.601027	0.203119	0.603003	0.69225
RP11-162P23.2	10.8084	12	0.503552	1	0.216168	0.0719359	3.005	0.00846991	0.203176	1.58737	0.692127
FAM161A	0.302122	1	0.67543	2	0.00604244	0.09649	0.0626225	1.68164e-09	0.203656	-3.99718	0.691103
WDFY3	253.142	50	23.8443	7	5.06283	3.40633	1.4863	0.111396	0.203818	0.571725	0.690757
EMILIN2	0.218616	1	1.70338	2	0.00437232	0.24334	0.017968	1.12396e-32	0.203931	-5.79843	0.690517
CAPN15	62.6616	36	5.57909	6	1.25323	0.797014	1.57241	0.0252895	0.204023	0.652976	0.690321
ZMYND11	254.026	50	21.417	6	5.08053	3.05958	1.66053	0.107648	0.204284	0.731646	0.689766
FBXO28	6.16753	11	1.98444	3	0.123351	0.283492	0.435111	0.424517	0.20448	-1.20054	0.68935
SLC25A13	134.062	49	12.1863	4	2.68124	1.74089	1.54015	0.239771	0.204699	0.623073	0.688885
AC093734.11	3.9111	9	1.74217	3	0.078222	0.248881	0.314295	0.0327118	0.204815	-1.66981	0.688637
CHMP3	15.2959	22	4.19544	4	0.305917	0.599349	0.510416	0.706179	0.204893	-0.970254	0.688474
TMEM50B	16.3013	29	0.977721	2	0.326026	0.139674	2.33418	0.264168	0.204944	1.22292	0.688365
ATG10	6.74137	13	3.36332	4	0.134827	0.480475	0.280613	0.00592872	0.205141	-1.83335	0.687947
EIF5B	34.2011	40	2.59141	4	0.684022	0.370201	1.8477	0.146702	0.205232	0.885733	0.687754
TXNDC5	6.38156	16	1.71956	3	0.127631	0.245652	0.519562	0.0780978	0.205379	-0.944632	0.687443
ADAMTSL5	30.4035	35	6.44348	5	0.60807	0.920497	0.660588	0.49274	0.205569	-0.598177	0.687042
NIPBL	362.182	50	35.0177	7	7.24364	5.00252	1.448	0.691638	0.205653	0.534059	0.686865
TFDP2	148.594	49	13.9972	6	2.97187	1.9996	1.48624	0.53428	0.205767	0.571663	0.686624
DHX36	37.0785	42	9.51433	5	0.74157	1.35919	0.545597	0.0286541	0.205773	-0.874092	0.686612
POLI	196.694	50	17.7274	7	3.93388	2.53249	1.55337	0.109761	0.205869	0.635399	0.686409
SH2B2	14.0773	21	0.503552	1	0.281547	0.0719359	3.91386	0.0500624	0.205944	1.96859	0.686251
PRKCE	78.8072	46	5.534	4	1.57614	0.790571	1.99368	0.131571	0.20595	0.995432	0.686238
EPN1	4.83142	15	2.12414	3	0.0966285	0.303448	0.318435	0.000302644	0.206149	-1.65093	0.685819
KMT2C	850.485	50	85.5339	7	17.0097	12.2191	1.39206	0.202601	0.206205	0.477217	0.6857
GCC2	37.1776	42	10.3205	5	0.743552	1.47436	0.504323	0.00355605	0.206286	-0.987581	0.685531
SMG9	16.0074	27	3.79607	5	0.320149	0.542295	0.590359	0.55766	0.206677	-0.760336	0.684707
NECAP2	7.54553	12	0.469228	2	0.150911	0.0670325	2.2513	0.011302	0.207457	1.17076	0.683073
ABCD3	92.9435	47	6.53831	4	1.85887	0.934044	1.99013	0.251573	0.207732	0.992864	0.682497
PAK1IP1	106.222	46	7.12845	5	2.12445	1.01835	2.08616	0.160098	0.207795	1.06085	0.682366
MED4	22.0001	32	1.26365	3	0.440001	0.180522	2.43739	0.0534575	0.207909	1.28534	0.682127
KIN	21.0361	29	1.0071	1	0.420721	0.143872	2.92428	0.346655	0.20807	1.54808	0.681791
CAMK1D	16.8629	26	0.993118	2	0.337259	0.141874	2.37717	0.255981	0.208077	1.24925	0.681776
RAVER2	170.315	48	13.1852	5	3.40629	1.8836	1.8084	0.241215	0.208938	0.854712	0.679982
RNF216P1	54.4524	41	3.7671	2	1.08905	0.538157	2.02366	0.7725	0.208966	1.01697	0.679925
POLE2	129.372	50	11.6144	6	2.58744	1.6592	1.55945	0.319901	0.209197	0.641034	0.679445
CASC4	249.917	50	23.5682	7	4.99834	3.36688	1.48456	0.502352	0.209385	0.570035	0.679054
ZNF207	33.0303	38	2.52826	3	0.660606	0.36118	1.82902	0.504373	0.209392	0.871071	0.67904
NDC1	130.446	48	23.9282	6	2.60893	3.41831	0.763223	0.264417	0.209575	-0.389824	0.67866
ACER3	21.5821	30	1.30269	2	0.431642	0.186099	2.31942	0.392318	0.209744	1.21377	0.678311
FAM234B	0.516302	2	0.788919	2	0.010326	0.112703	0.091622	5.64252e-09	0.210085	-3.44816	0.677605
MPND	15.8152	27	4.20988	4	0.316304	0.601411	0.525936	0.220241	0.210093	-0.92704	0.677588
SLC4A7	521.549	50	108.795	7	10.431	15.5422	0.67114	0.543257	0.210159	-0.575314	0.677452
NOD1	22.2838	32	1.33146	2	0.445675	0.190208	2.34309	0.337516	0.210693	1.22841	0.67635
SEC62	136.141	49	11.4633	4	2.72281	1.63762	1.66267	0.934856	0.210854	0.7335	0.676018
CCDC6	31.8745	35	1.88133	2	0.637489	0.268762	2.37195	0.623615	0.210887	1.24607	0.675949
PHF6	33.9279	39	2.20787	2	0.678559	0.31541	2.15135	0.720993	0.210909	1.10524	0.675905
INVS	44.4344	45	3.93755	5	0.888688	0.562507	1.57987	0.584389	0.211055	0.659806	0.675603
WASF1	4.87972	12	0.251606	1	0.0975944	0.0359438	2.7152	0.0424127	0.211311	1.44106	0.675077
ITPR3	15.9677	25	0.763681	1	0.319354	0.109097	2.92724	0.334032	0.211386	1.54954	0.674924
ATL2	98.5781	46	8.59155	5	1.97156	1.22736	1.60634	0.162248	0.21148	0.683775	0.67473
SUPT16H	152.346	49	13.8384	7	3.04693	1.97692	1.54125	0.0957283	0.211639	0.624099	0.674404
MAPKAPK5	45.9359	46	4.13626	5	0.918718	0.590894	1.55479	0.2665	0.211771	0.636723	0.674134
RHEB	186.985	50	15.8324	7	3.7397	2.26177	1.65344	0.181437	0.211852	0.725472	0.673968
EPC2	32.6275	38	7.45328	6	0.65255	1.06475	0.612865	0.657719	0.211866	-0.70636	0.673938
MSRA	6.66743	13	3.32494	3	0.133349	0.474991	0.280739	0.000346185	0.211932	-1.8327	0.673803
RNF20	0.979977	4	2.12578	2	0.0195995	0.303682	0.0645396	5.08401e-21	0.212068	-3.95367	0.673524
TBC1D32	146.397	50	14.7445	7	2.92794	2.10636	1.39005	0.024674	0.21213	0.475138	0.673398
IFT57	2.47093	8	1.32548	3	0.0494187	0.189354	0.260986	0.00170067	0.212158	-1.93796	0.673341
NDFIP2	65.3053	36	5.41946	5	1.30611	0.774208	1.68702	0.0400608	0.212363	0.754478	0.672922
SYDE2	41.9994	40	2.39751	3	0.839988	0.342501	2.45251	0.0785418	0.2133	1.29426	0.671008
GS1-259H13.13	2.55054	6	0.938794	2	0.0510108	0.134113	0.380356	0.108775	0.213371	-1.39458	0.670864
SNX9	52.9587	42	4.52167	3	1.05917	0.645953	1.63971	0.844154	0.21382	0.713436	0.669951
DCBLD1	48.2748	44	3.46417	4	0.965496	0.494881	1.95097	0.215567	0.214739	0.96419	0.668089
LNPEP	39.5164	39	2.35923	4	0.790328	0.337034	2.34495	0.0814166	0.214825	1.22956	0.667915
FBN1	22.1047	24	5.38876	6	0.442094	0.769823	0.574281	0.762788	0.214851	-0.800172	0.667863
FAM73B	2.75105	9	1.41026	3	0.055021	0.201466	0.273103	0.00103131	0.21512	-1.87248	0.667318
PPP6C	10.555	22	0.400444	1	0.2111	0.0572064	3.69015	0.0676619	0.215373	1.88368	0.666809
KIF22	5.21801	12	2.16414	3	0.10436	0.309162	0.337558	0.0211082	0.215377	-1.56679	0.666801
PLPP4	14.5343	5	7.40991	3	0.290686	1.05856	0.274605	0.102221	0.215413	-1.86457	0.666728
COBL	31.4875	27	1.33812	1	0.629751	0.19116	3.29436	0.147237	0.21556	1.72	0.666432
MAP2K4	531.959	50	48.4685	6	10.6392	6.92407	1.53655	0.939536	0.21557	0.619694	0.666411
COL18A1	2.25719	5	2.09848	3	0.0451437	0.299783	0.150588	8.76908e-08	0.215628	-2.73132	0.666296
ATG4C	76.4857	47	6.27227	5	1.52971	0.896039	1.7072	0.116592	0.215751	0.771629	0.666048
NSD2	1265.04	50	298.832	7	25.3009	42.6903	0.59266	7.29369e-05	0.2158	-0.754724	0.665948
SRSF11	32.6458	40	2.58057	4	0.652916	0.368653	1.77109	0.684628	0.215869	0.824634	0.66581
SHANK2	267.018	43	15.7907	4	5.34036	2.25582	2.36737	0.358894	0.216032	1.24328	0.665483
FBXO38	66.4746	46	13.1895	7	1.32949	1.88421	0.705597	0.729633	0.216335	-0.503084	0.664873
SSX2IP	33.6206	36	7.30868	5	0.672413	1.0441	0.644013	0.131608	0.216454	-0.634837	0.664634
RASSF8	91.3011	38	32.8526	6	1.82602	4.69322	0.389076	0.000360273	0.216482	-1.36188	0.664578
RNH1	2.83686	7	1.89783	3	0.0567373	0.271118	0.209271	9.98158e-05	0.216487	-2.25655	0.664569
MFSD13A	4.45211	10	0.217621	1	0.0890422	0.0310888	2.86413	0.013214	0.216758	1.5181	0.664025
CTDNEP1	2.1236	6	0.788919	2	0.0424719	0.112703	0.376849	0.128911	0.216998	-1.40794	0.663545
RP11-86H7.1	11.9466	20	0.760438	2	0.238931	0.108634	2.19942	0.0306624	0.217052	1.13712	0.663435
ZBTB8OS	44.7191	38	3.07267	4	0.894381	0.438953	2.03753	0.0542417	0.217201	1.02682	0.663138
DHX57	25.8346	29	1.40904	2	0.516691	0.201292	2.56688	0.113046	0.217267	1.36001	0.663007
EXOC6	157.085	49	13.2691	7	3.1417	1.89558	1.65738	0.546634	0.217616	0.728905	0.662309
MEAF6	1.60274	4	0.657331	2	0.0320547	0.0939044	0.341355	0.161968	0.217673	-1.55066	0.662195
NRF1	140.899	50	14.6467	7	2.81799	2.09238	1.34678	0.486968	0.21775	0.429517	0.662042
UBXN2A	302.746	50	29.169	7	6.05493	4.167	1.45307	0.226303	0.217789	0.5391	0.661963
IPO11	248.525	50	23.5151	7	4.97049	3.35931	1.47962	0.380897	0.217972	0.565226	0.661599
SEPT6	14.5312	27	5.22281	4	0.290624	0.746116	0.389516	0.000503827	0.218219	-1.36025	0.661108
SPIRE2	2.93374	9	2.29152	3	0.0586748	0.327359	0.179237	7.32865e-09	0.218522	-2.48006	0.660505
SENP7	40.2041	41	2.85132	4	0.804081	0.407332	1.97402	0.0703087	0.218706	0.981136	0.66014
ZFYVE28	6.91367	15	2.07371	3	0.138273	0.296244	0.466755	0.400073	0.219121	-1.09926	0.659316
NSMCE4A	13.153	23	0.755158	2	0.263061	0.10788	2.43846	0.226273	0.219206	1.28597	0.659147
DMC1	143.969	46	10.0865	5	2.87938	1.44093	1.99827	0.0582808	0.21921	0.998754	0.659139
SLF2	326.851	50	34.585	7	6.53703	4.94071	1.32309	0.117559	0.219215	0.403916	0.65913
POLL	6.75345	11	3.16038	3	0.135069	0.451483	0.299167	0.0367239	0.219262	-1.74098	0.659036
CRK	22.6434	31	4.98982	5	0.452867	0.712832	0.635307	0.133883	0.219338	-0.654473	0.658886
SCFD2	34.1694	38	1.98841	2	0.683389	0.284058	2.40581	0.640073	0.219339	1.26652	0.658884
PPP1R9A	81.5527	38	5.25572	5	1.63105	0.750817	2.17237	0.165821	0.219394	1.11927	0.658775
SEPT2	136.375	50	12.39	7	2.72751	1.77	1.54096	0.207038	0.219437	0.623833	0.658689
DLEU2	19.3259	28	4.97607	6	0.386519	0.710867	0.543729	0.805371	0.219484	-0.879042	0.658597
TEP1	69.7173	48	5.94738	5	1.39435	0.849626	1.64113	0.173349	0.219559	0.714689	0.658448
INTS13	47.9972	37	3.11256	3	0.959944	0.444651	2.15887	0.16816	0.219881	1.11028	0.657812
BTBD10	360.431	50	74.0271	7	7.20862	10.5753	0.681646	0.0137156	0.219939	-0.552904	0.657698
UBE2F-SCLY	4.57632	10	1.97443	3	0.0915263	0.282061	0.324491	0.0184929	0.22006	-1.62375	0.657459
ME1	575.134	50	43.7957	6	11.5027	6.25653	1.83851	0.105847	0.220295	0.878535	0.656995
GNAS	34.8044	35	7.88775	4	0.696088	1.12682	0.617745	0.277188	0.220394	-0.694918	0.656801
ADNP	33.4942	39	2.33317	3	0.669884	0.333311	2.00979	0.256228	0.220508	1.00704	0.656576
CCDC81	3.72576	6	1.37072	2	0.0745153	0.195818	0.380534	0.0681114	0.220569	-1.3939	0.656456
POGZ	27.3116	36	1.53739	2	0.546232	0.219627	2.4871	0.196025	0.220656	1.31446	0.656284
CDH7	25.8573	8	0.217621	1	0.517146	0.0310888	16.6345	7.03805e-09	0.220793	4.05611	0.656015
CEP72	281.113	48	62.5522	7	5.62227	8.93603	0.629168	0.294439	0.220835	-0.668482	0.655932
RBMS1	21.9634	30	1.20929	1	0.439268	0.172755	2.54272	0.715759	0.220886	1.34637	0.655832
MTMR9	22.7575	29	1.28016	2	0.455151	0.18288	2.48879	0.157179	0.220953	1.31545	0.655701
KHSRP	4.14375	11	0.217621	1	0.0828749	0.0310888	2.66575	0.046825	0.221016	1.41454	0.655577
DICER1	45.8442	42	9.10437	5	0.916884	1.30062	0.704957	0.240063	0.221219	-0.504393	0.655178
RP11-447L10.1	0.183442	1	0.840396	2	0.00366884	0.120057	0.0305592	9.22435e-23	0.221574	-5.03225	0.654481
RPRD1B	434.656	50	39.0217	7	8.69312	5.57453	1.55943	0.112518	0.2217	0.641023	0.654234
PLEKHM1P	76.4455	46	6.58295	6	1.52891	0.940421	1.62577	0.678089	0.221863	0.701123	0.653915
DPY19L2	31.8683	25	2.41193	3	0.637366	0.344561	1.84979	0.0189581	0.221921	0.887363	0.653802
N4BP2L2	426.738	50	44.3191	7	8.53475	6.33129	1.34803	0.974414	0.221943	0.430849	0.653758
ATP23	43.014	40	3.07522	2	0.86028	0.439318	1.95822	0.813172	0.222164	0.969542	0.653326
AP3S2	96.6963	45	7.88921	5	1.93393	1.12703	1.71595	0.265574	0.222217	0.779007	0.653223
GIT2	44.6749	45	3.9091	4	0.893497	0.558443	1.59998	0.894615	0.222219	0.678052	0.653219
SSB	4.13478	11	1.83723	3	0.0826957	0.262461	0.315077	0.024501	0.222362	-1.66622	0.652939
HNRNPA2B1	102.955	50	10.0047	7	2.05909	1.42924	1.44069	0.262978	0.222372	0.526757	0.65292
ZC3H14	75.6628	46	6.81896	5	1.51326	0.974137	1.55343	0.943722	0.222403	0.635458	0.65286
FIP1L1	587.831	50	54.1828	7	11.7566	7.7404	1.51886	0.059957	0.222664	0.602993	0.652351
CEP57L1	17.4958	35	3.67031	5	0.349917	0.52433	0.66736	0.183696	0.222712	-0.583462	0.652257
PPP1CB	172.579	48	15.2748	6	3.45157	2.18211	1.58176	0.207155	0.223168	0.66153	0.651369
TRA2B	189.899	48	41.3804	7	3.79797	5.91149	0.642473	0.0354447	0.2234	-0.638292	0.650918
MIS18BP1	78.5891	48	5.64408	4	1.57178	0.806298	1.94938	0.39773	0.223493	0.963017	0.650735
CYP51A1	85.9962	47	6.61197	4	1.71992	0.944568	1.82086	0.474536	0.223543	0.864618	0.65064
TMPRSS2	10.5216	9	0.503552	1	0.210433	0.0719359	2.92528	0.00802148	0.22361	1.54857	0.650508
METTL6	28.705	34	6.93979	5	0.5741	0.991399	0.579081	0.25395	0.223779	-0.788164	0.65018
ALG12	3.11531	7	1.60408	3	0.0623063	0.229154	0.271897	0.0139482	0.224084	-1.87887	0.64959
YWHAZ	16.2229	25	0.645361	1	0.324457	0.0921944	3.51927	0.0851737	0.224357	1.81528	0.64906
SUPT5H	41.9475	42	3.31874	3	0.838951	0.474106	1.76954	0.494981	0.225199	0.823376	0.647433
GALNT2	58.749	45	4.96204	3	1.17498	0.708864	1.65755	0.252216	0.225341	0.729055	0.647161
GLCE	40.3894	37	12.0889	5	0.807789	1.72698	0.467747	0.0729264	0.225359	-1.0962	0.647125
CDC42	87.7674	47	6.98531	5	1.75535	0.997901	1.75904	0.334902	0.225477	0.814789	0.646898
DNAJC1	209.698	49	17.9609	7	4.19397	2.56584	1.63454	0.188884	0.225639	0.708882	0.646586
UBE3A	1254.63	50	127.347	7	25.0926	18.1924	1.37929	0.497522	0.225751	0.463929	0.646371
GPR137C	1.88205	3	0.822265	2	0.037641	0.117466	0.32044	0.0968577	0.226044	-1.64187	0.645808
FKTN	10.0322	20	2.50838	4	0.200645	0.35834	0.559928	0.627389	0.226258	-0.836688	0.645397
FXR2	9.12207	23	0.469228	2	0.182441	0.0670325	2.72168	0.0637677	0.226259	1.4445	0.645395
WASL	16.6191	17	0.763681	1	0.332381	0.109097	3.04665	0.00419641	0.226454	1.60722	0.64502
PNPLA3	9.65472	15	4.58966	3	0.193094	0.655665	0.294501	0.000177569	0.226832	-1.76365	0.644297
FER	180.539	50	16.7455	7	3.61077	2.39221	1.50938	0.283087	0.227116	0.59396	0.643751
ZCCHC7	135.229	47	35.3267	7	2.70459	5.04667	0.535915	0.0426916	0.227133	-0.899925	0.643719
C16orf45	15.1219	17	4.46839	3	0.302439	0.638341	0.473789	0.0510209	0.227302	-1.07768	0.643397
HGSNAT	31.8614	37	1.66363	2	0.637228	0.237662	2.68124	0.0795782	0.227305	1.4229	0.643391
MANBA	175.2	50	17.3064	6	3.504	2.47234	1.41728	0.996053	0.227355	0.503127	0.643295
ISY1-RAB43	4.17432	12	1.69499	3	0.0834863	0.242142	0.344783	0.00554278	0.227524	-1.53624	0.642972
SCYL3	9.4433	20	0.388474	1	0.188866	0.0554963	3.40322	0.103648	0.227724	1.7669	0.642591
SLAIN2	306.174	49	29.3902	6	6.12349	4.1986	1.45846	0.262683	0.227775	0.544445	0.642494
H2AFV	76.6713	42	6.50161	6	1.53343	0.928801	1.65097	0.0796548	0.227894	0.723317	0.642267
RPS6KA6	48.9935	36	2.90852	3	0.979871	0.415503	2.35828	0.0507229	0.228222	1.23773	0.641643
GLUD1	30.1522	41	2.06865	4	0.603044	0.295521	2.04062	0.0728398	0.228361	1.029	0.641378
UBE2D2	414.113	50	40.7835	7	8.28225	5.82621	1.42155	0.623677	0.228386	0.507465	0.641331
CACTIN	85.2471	42	18.1413	6	1.70494	2.59161	0.65787	0.417668	0.228431	-0.604127	0.641244
USP11	7.72445	16	2.10585	3	0.154489	0.300835	0.513533	0.270163	0.228489	-0.96147	0.641134
FRG1HP	1.15361	4	1.23862	2	0.0230723	0.176945	0.130392	9.49851e-09	0.22868	-2.93907	0.640771
TTC1	71.7706	41	5.29337	5	1.43541	0.756196	1.8982	0.110373	0.229066	0.924632	0.640039
TYK2	13.8231	28	2.9279	5	0.276461	0.418272	0.660961	0.525276	0.229279	-0.597362	0.639636
EHD2	69.2846	39	4.33455	4	1.38569	0.619222	2.2378	0.0516385	0.229493	1.16208	0.639231
C9orf9	2.05758	6	2.35331	2	0.0411516	0.336187	0.122407	7.08844e-11	0.229539	-3.03024	0.639143
TPR	62.6058	48	5.43409	4	1.25212	0.776299	1.61293	0.706003	0.229566	0.689684	0.639092
ZFP30	4.74102	8	1.6599	2	0.0948204	0.237128	0.39987	0.112194	0.22969	-1.3224	0.638859
RP11-526A4.1	1.57233	5	1.66688	2	0.0314466	0.238125	0.132059	1.11212e-09	0.229983	-2.92075	0.638304
ASTN2	25.4136	23	1.90757	4	0.508273	0.272509	1.86516	0.00619536	0.230095	0.899296	0.638093
PRKD3	505.313	50	216.216	7	10.1063	30.888	0.327191	3.56122e-14	0.230404	-1.6118	0.637511
ARHGAP26	489.217	49	28.05	7	9.78435	4.00715	2.44172	0.0692448	0.230499	1.2879	0.637332
ARL6IP4	3.41329	7	1.74028	3	0.0682657	0.248611	0.274589	0.0228395	0.230696	-1.86466	0.636959
RP11-33B1.1	12.9018	28	0.652864	1	0.258037	0.0932663	2.76666	0.400915	0.230706	1.46815	0.636942
FAM175A	12.1027	21	0.503213	1	0.242053	0.0718875	3.36711	0.107918	0.23088	1.75151	0.636613
SEPT11	64.0538	46	15.9503	6	1.28108	2.27861	0.562218	0.00400786	0.231242	-0.830798	0.635933
ZFY	96.7438	23	5.90623	3	1.93488	0.843748	2.29319	0.00324384	0.231258	1.19736	0.635903
TMEM230	21.0885	31	1.34889	3	0.421771	0.192698	2.18876	0.117169	0.231405	1.13012	0.635628
PSMD6	13.2864	20	0.892026	2	0.265728	0.127432	2.08525	0.0349233	0.231642	1.06022	0.635183
PPARGC1A	14.3171	6	0.256886	1	0.286342	0.0366981	7.80263	9.58702e-07	0.231758	2.96396	0.634966
FOXO3	111.942	49	9.27189	5	2.23883	1.32456	1.69025	0.0801553	0.231864	0.757239	0.634767
TXLNG	53.7031	45	18.2958	6	1.07406	2.61368	0.410938	1.23512e-05	0.231908	-1.28301	0.634684
RP13-104F24.2	17.7369	25	0.669061	1	0.354737	0.0955802	3.71141	0.0538766	0.232179	1.89197	0.634177
OTUD7A	2.67051	8	0.892026	2	0.0534103	0.127432	0.419127	0.0779628	0.23221	-1.25454	0.634119
ETV5	12.8134	22	3.13606	4	0.256267	0.448008	0.572015	0.601263	0.232238	-0.805875	0.634066
SEMA3F	2.16566	7	2.33127	2	0.0433131	0.333039	0.130054	2.89408e-13	0.232279	-2.94281	0.633991
ELMO3	1.06288	3	2.05851	2	0.0212576	0.294073	0.0722868	7.42849e-16	0.23228	-3.79012	0.633989
CTD-2026D20.3	8.19525	21	1.98475	3	0.163905	0.283536	0.578075	0.0808852	0.232402	-0.79067	0.633761
NOL6	4.36914	8	1.56528	2	0.0873827	0.223611	0.39078	0.125285	0.232556	-1.35557	0.633472
MDM2	229.094	50	20.4164	5	4.58188	2.91663	1.57095	0.673077	0.23259	0.65164	0.63341
OGFOD1	10.0496	18	3.56158	4	0.200992	0.508797	0.395034	0.017302	0.232607	-1.33995	0.633377
VPS13D	195.561	50	19.3645	7	3.91121	2.76635	1.41385	0.910339	0.232624	0.499631	0.633346
PTPN14	85.0772	45	17.55	7	1.70154	2.50715	0.678677	0.365454	0.232626	-0.559202	0.633342
AGL	28.932	37	2.05485	4	0.57864	0.29355	1.97118	0.11959	0.232756	0.97906	0.633099
CCSER1	105.834	41	6.63247	4	2.11669	0.947496	2.23398	0.184257	0.233189	1.15962	0.632292
ZFAT	163.854	48	13.9344	5	3.27707	1.99062	1.64625	0.381836	0.233412	0.719186	0.631877
TP53	1.08879	3	1.19626	2	0.0217759	0.170894	0.127423	1.41457e-07	0.233663	-2.9723	0.63141
FAM160B2	3.88645	10	1.26826	3	0.0777291	0.18118	0.429016	0.178899	0.23386	-1.2209	0.631044
LIG1	62.0006	46	5.38777	4	1.24001	0.769681	1.61107	0.748399	0.233984	0.688022	0.630815
MRE11A	120.188	49	13.5262	7	2.40376	1.93232	1.24398	0.040834	0.234047	0.314961	0.630697
RP11-798G7.3	41.2177	46	3.41225	2	0.824355	0.487464	1.69111	0.301806	0.234485	0.757969	0.629885
LINC-PINT	21.9891	28	1.30531	2	0.439781	0.186472	2.35843	0.190105	0.234541	1.23783	0.629781
CCT2	711.536	50	73.3074	7	14.2307	10.4725	1.35887	0.893051	0.235286	0.442407	0.628403
RAC1	28.1073	34	1.11987	1	0.562145	0.159981	3.51382	0.0763547	0.235417	1.81304	0.628163
CTD-2514C3.1	1.52411	5	1.45639	2	0.0304823	0.208055	0.14651	3.55627e-09	0.236062	-2.77092	0.626974
MDN1	265.355	50	61.3435	7	5.30711	8.76336	0.605602	0.000923467	0.236263	-0.723558	0.626605
ELK4	28.797	33	7.13722	6	0.57594	1.0196	0.564867	0.793237	0.236324	-0.824017	0.626492
FAT1	1822.12	50	376.598	7	36.4424	53.7997	0.677372	0.845415	0.236604	-0.56198	0.625978
RASA1	114.277	49	11.3823	7	2.28554	1.62604	1.40559	0.00324479	0.236707	0.491172	0.625789
TDRD3	497.578	50	44.0219	7	9.95157	6.28884	1.58242	0.0751891	0.236731	0.662131	0.625745
RP11-346L13.3	13.8314	23	0.655106	1	0.276628	0.0935866	2.95585	0.246409	0.237036	1.56357	0.625186
ANKRD16	2.77196	7	0.938794	2	0.0554392	0.134113	0.413375	0.105816	0.237186	-1.27448	0.624911
ATXN2	968.025	50	102.032	7	19.3605	14.5761	1.32824	0.442675	0.237337	0.409516	0.624635
FNBP1	104.427	48	8.61861	5	2.08853	1.23123	1.6963	0.0629895	0.23737	0.762389	0.624573
NBEAL1	258.1	50	27.093	7	5.162	3.87043	1.3337	0.0532262	0.237762	0.415436	0.623858
RNF216	296.671	50	30.4218	7	5.93342	4.34597	1.36527	0.533503	0.237953	0.449185	0.623508
CDT1	0.969697	2	0.469228	2	0.0193939	0.0670325	0.289321	0.460757	0.237968	-1.78926	0.623481
RP5-1022I14.1	31.126	37	2.32622	2	0.622519	0.332317	1.87327	0.87675	0.23811	0.905558	0.623221
STK11IP	2.26959	6	3.4296	2	0.0453918	0.489943	0.0926472	2.09754e-16	0.238126	-3.43211	0.623192
CHURC1-FNTB	16.917	32	1.19589	2	0.33834	0.170842	1.98043	0.841908	0.238482	0.985813	0.622544
SZT2	9.67291	22	0.503552	1	0.193458	0.0719359	2.68931	0.447103	0.238671	1.42724	0.6222
TGFBRAP1	35.6621	37	2.12697	2	0.713242	0.303853	2.34733	0.182541	0.238677	1.23102	0.62219
PDCD2	0.263777	1	0.924711	2	0.00527554	0.132102	0.0399355	2.13633e-18	0.238754	-4.64618	0.62205
RP13-511M20.1	2.79204	10	1.24472	3	0.0558407	0.177818	0.314033	0.00331582	0.238768	-1.67101	0.622024
CRY1	14.5461	23	0.673104	1	0.290922	0.0961578	3.02546	0.207272	0.238784	1.59716	0.621995
TLK1	399.433	50	30.8654	7	7.98866	4.40935	1.81176	0.108169	0.238903	0.857389	0.621779
LRRC34	1.58643	4	1.56932	2	0.0317285	0.224189	0.141526	7.42998e-08	0.239022	-2.82086	0.621563
NUCB1	62.1489	45	5.24546	4	1.24298	0.749352	1.65874	0.870134	0.239055	0.730086	0.621503
TRAF6	12.9197	24	0.726114	2	0.258393	0.103731	2.491	0.149728	0.239252	1.31673	0.621144
SMAD2	592.814	49	59.1067	7	11.8563	8.44381	1.40414	0.00608731	0.239398	0.489686	0.620879
MIA-RAB4B	5.70897	11	0.286956	1	0.114179	0.0409937	2.78529	0.0122178	0.239512	1.47783	0.620673
BAG4	0.344189	1	0.721173	2	0.00688377	0.103025	0.0668167	9.33187e-10	0.239519	-3.90365	0.620659
USP30	28.7812	37	6.04751	6	0.575623	0.86393	0.666285	0.865321	0.239692	-0.585789	0.620346
DAG1	10.1063	18	2.7131	3	0.202126	0.387586	0.5215	0.219964	0.240104	-0.939259	0.619601
NUP210L	35.3315	26	1.79243	1	0.706631	0.256062	2.75961	0.0139488	0.240562	1.46446	0.618773
CNIH4	48.7442	42	3.7877	4	0.974883	0.5411	1.80167	0.502384	0.240914	0.849334	0.618139
NF1	923.437	50	93.802	7	18.4687	13.4003	1.37823	0.0719949	0.24103	0.462821	0.617928
CDK1	6.95885	14	1.93256	3	0.139177	0.27608	0.504118	0.329426	0.241395	-0.988165	0.617272
HIPK1	38.0649	39	2.71713	3	0.761298	0.388162	1.96129	0.404175	0.241515	0.971804	0.617056
CENPC	29.7723	39	2.34432	3	0.595446	0.334903	1.77797	0.96928	0.241621	0.830228	0.616866
ST3GAL5	117.871	42	6.23657	2	2.35741	0.890939	2.64599	0.329083	0.241749	1.40381	0.616636
RILPL2	1.48577	4	2.03891	2	0.0297155	0.291273	0.102019	3.99529e-11	0.24192	-3.29309	0.616328
ZNF333	4.65572	8	0.217621	1	0.0931144	0.0310888	2.99511	0.00388995	0.241928	1.58261	0.616313
CENPP	5.68948	10	2.07227	2	0.11379	0.296038	0.384374	0.159989	0.242043	-1.37942	0.616107
SPRED1	14.6191	22	5.46842	3	0.292383	0.781202	0.374273	0.0180995	0.242064	-1.41784	0.616071
GK5	35.7348	39	2.68994	3	0.714696	0.384278	1.85984	0.425892	0.242159	0.895182	0.615899
CCDC93	28.9884	38	2.19902	2	0.579767	0.314146	1.84554	0.62474	0.242347	0.88404	0.615562
MCM9	24.22	29	1.47599	3	0.4844	0.210856	2.2973	0.0949862	0.242349	1.19994	0.615559
SPRED2	45.2166	36	3.31149	4	0.904333	0.47307	1.91163	0.192523	0.242368	0.934802	0.615525
CTBP1	358.547	49	67.729	7	7.17094	9.67557	0.741139	0.482492	0.242384	-0.432185	0.615496
DHODH	0.600588	2	0.543842	2	0.0120118	0.0776917	0.154608	0.00094124	0.242454	-2.69331	0.615371
ACTR3B	38.2316	39	8.06859	5	0.764631	1.15266	0.663365	0.528951	0.242525	-0.592125	0.615244
SPAG1	114.653	48	8.60174	5	2.29305	1.22882	1.86606	0.146101	0.242746	0.899998	0.614848
RSF1	529.879	50	44.2057	7	10.5976	6.31509	1.67814	0.0593191	0.242851	0.74686	0.61466
KDM1A	922.643	50	89.1667	7	18.4529	12.7381	1.44864	0.142755	0.242883	0.534694	0.614604
INTS1	42.4684	33	2.31777	3	0.849369	0.33111	2.56521	0.0924776	0.242898	1.35908	0.614576
PTCHD4	8.01302	8	0.286956	1	0.16026	0.0409937	3.9094	0.000198856	0.242942	1.96695	0.614497
LRRC16A	126.003	49	13.1364	7	2.52007	1.87663	1.34286	0.000812518	0.243186	0.425314	0.614062
SEC61A2	4.69872	13	2.53492	3	0.0939743	0.362132	0.259503	1.36141e-06	0.243213	-1.94618	0.614014
FBXW2	7.31765	19	3.14431	3	0.146353	0.449187	0.325817	0.000193427	0.243328	-1.61786	0.613809
SNRPD2	0.987157	3	0.914217	2	0.0197431	0.130602	0.15117	7.06497e-05	0.243479	-2.72576	0.613538
FOXJ3	179.761	50	17.1791	5	3.59521	2.45415	1.46495	0.773837	0.243747	0.550854	0.61306
LSM14A	167.862	49	14.7531	5	3.35723	2.10758	1.59293	0.422479	0.243773	0.671685	0.613015
GTF2H3	21.3849	26	4.85781	5	0.427698	0.693972	0.616303	0.813709	0.243882	-0.698287	0.61282
ACOT9	48.3225	43	4.06982	4	0.966451	0.581403	1.66227	0.876073	0.244058	0.733157	0.612506
PRPSAP2	178.607	49	17.492	5	3.57213	2.49886	1.42951	0.983023	0.244272	0.515517	0.612126
ZMYND19	10.1179	19	5.16605	4	0.202358	0.738007	0.274195	3.86e-08	0.244519	-1.86673	0.611687
RNF32	1.59778	5	1.36177	2	0.0319556	0.194538	0.164264	1.54683e-07	0.24459	-2.60591	0.611561
CLN8	0.517381	1	0.96006	2	0.0103476	0.137151	0.0754467	3.18122e-08	0.244791	-3.7284	0.611204
SHOC2	302.063	50	31.549	7	6.04126	4.507	1.34042	0.326365	0.24517	0.422682	0.610534
ZNF569	32.1464	37	7.0211	4	0.642928	1.00301	0.640996	0.106364	0.24529	-0.641613	0.61032
FBXW11	70.3888	46	6.23101	4	1.40778	0.890144	1.58152	0.715102	0.245349	0.661308	0.610216
PPM1A	13.5247	25	4.2081	4	0.270493	0.601157	0.449954	0.0277653	0.24567	-1.15215	0.609649
PAIP2	249.985	50	24.2563	6	4.9997	3.46519	1.44283	0.688934	0.245855	0.528905	0.609321
GTF3C2	4.01377	10	0.217621	1	0.0802754	0.0310888	2.58213	0.0441683	0.245953	1.36856	0.609147
KIAA2026	142.534	48	13.0223	5	2.85067	1.86032	1.53235	0.892111	0.246042	0.615748	0.608991
PRDX6	1.2793	4	1.08706	2	0.0255859	0.155294	0.164758	2.70763e-06	0.246724	-2.60158	0.607789
RNF114	32.6907	36	2.76957	5	0.653814	0.395653	1.65249	0.162055	0.24682	0.724644	0.607619
ZMPSTE24	40.3434	43	10.4337	6	0.806869	1.49053	0.54133	0.000289091	0.246954	-0.885419	0.607384
ZYG11B	12.4402	20	0.513773	1	0.248803	0.0733961	3.38987	0.0867852	0.246989	1.76123	0.607323
PDK3	17.4581	23	0.763681	1	0.349162	0.109097	3.20046	0.129025	0.247583	1.67828	0.60628
INTS12	18.0805	33	1.23819	2	0.361611	0.176884	2.04434	0.562073	0.247762	1.03163	0.605965
SLC35B1	2084.04	22	7.71155	2	41.6809	1.10165	37.8349	1.80122e-11	0.247812	5.24165	0.605878
COL5A2	3.10279	3	3.51568	3	0.0620557	0.50224	0.123558	4.86764e-08	0.247822	-3.01674	0.60586
CTD-2528L19.4	20.1725	26	1.07355	2	0.403449	0.153364	2.63066	0.0808689	0.24789	1.39543	0.605741
GTSE1	16.4302	28	3.83741	3	0.328605	0.548202	0.599423	0.0525884	0.247943	-0.738354	0.605648
ZNF611	5.52068	10	0.286956	1	0.110414	0.0409937	2.69343	0.0178938	0.24795	1.42944	0.605635
MFSD11	53.065	46	4.3259	5	1.0613	0.617986	1.71735	0.799427	0.247963	0.780188	0.605614
MAML1	13.5874	29	3.91417	4	0.271748	0.559167	0.485986	0.00747826	0.24799	-1.04101	0.605566
TBC1D5	173.056	48	13.2032	6	3.46111	1.88617	1.835	0.00065135	0.248101	0.875777	0.605371
CAPNS1	9.18662	12	4.4677	3	0.183732	0.638243	0.287872	0.00313792	0.248269	-1.7965	0.605078
DFNB31	15.7029	17	1.04211	2	0.314058	0.148873	2.10956	0.014944	0.248783	1.07694	0.604179
SNX25	291.503	50	73.4887	7	5.83007	10.4984	0.55533	0.0111352	0.248838	-0.848583	0.604083
PPP2R2D	49.9472	41	3.58161	4	0.998943	0.511659	1.95236	0.306871	0.249288	0.96522	0.603299
PNPT1	114.793	49	10.3222	6	2.29586	1.4746	1.55694	0.284335	0.249529	0.638711	0.602879
MAP3K9	79.7108	38	5.18361	4	1.59422	0.740515	2.15285	0.0547343	0.249636	1.10625	0.602692
HORMAD1	51.5772	23	3.1382	2	1.03154	0.448315	2.30094	0.029609	0.249728	1.20222	0.602532
IPMK	19.2936	26	1.10931	2	0.385871	0.158473	2.43494	0.123687	0.249734	1.28389	0.602523
TPCN2	15.7955	26	0.942062	2	0.315911	0.13458	2.34738	0.251166	0.249821	1.23105	0.60237
RP11-219A15.1	4.10513	7	1.41777	3	0.0821027	0.202538	0.405368	0.888811	0.24999	-1.30269	0.602078
BIRC3	2.67716	7	2.25057	2	0.0535432	0.32151	0.166537	5.66063e-09	0.25058	-2.58609	0.601054
NMD3	39.8545	41	3.38124	4	0.797089	0.483035	1.65017	0.826685	0.250806	0.722614	0.600663
BNIP3L	18.1341	28	0.96006	2	0.362681	0.137151	2.64438	0.100532	0.250922	1.40293	0.600462
RPS8	4.05048	9	0.217621	1	0.0810096	0.0310888	2.60575	0.0312128	0.251181	1.3817	0.600012
THSD1	60.4456	41	19.1966	5	1.20891	2.74237	0.440828	0.00260493	0.251333	-1.18171	0.599751
LIMA1	13.865	22	0.604644	1	0.2773	0.0863777	3.21032	0.12131	0.251499	1.68272	0.599464
DYRK1A	1065.18	50	107.266	7	21.3037	15.3237	1.39024	0.416523	0.251535	0.475336	0.599402
FAM126B	83.4833	49	7.894	4	1.66967	1.12771	1.48057	0.0820338	0.251719	0.566157	0.599085
LDLR	218.531	50	55.1198	7	4.37062	7.87425	0.555052	0.000104878	0.252138	-0.849306	0.598362
CHMP6	7.95363	20	3.52565	3	0.159073	0.503664	0.31583	2.76424e-06	0.252215	-1.66278	0.598229
CDC27	135.61	49	13.4028	7	2.71221	1.91469	1.41653	0.22821	0.252223	0.502356	0.598215
LAS1L	17.8028	25	4.23176	4	0.356055	0.604537	0.588972	0.196745	0.252224	-0.763728	0.598213
AIFM2	1.64243	3	1.36832	2	0.0328487	0.195475	0.168045	0.00114575	0.252386	-2.57308	0.597935
FAM221A	0.513407	2	0.911993	2	0.0102681	0.130285	0.0788131	3.38209e-12	0.252584	-3.66542	0.597594
ENOX1	24.4978	22	1.29007	2	0.489957	0.184296	2.65853	0.000589909	0.252975	1.41063	0.596923
OSBP2	1.79049	5	1.41879	2	0.0358098	0.202684	0.176678	3.81924e-06	0.252999	-2.5008	0.596881
MRPL39	12.2315	24	0.513773	1	0.244629	0.0733961	3.333	0.0917025	0.253052	1.73682	0.59679
MLKL	14.5976	24	0.669061	1	0.291951	0.0955802	3.05452	0.168585	0.253164	1.61094	0.596598
SRGAP2C	6.58886	17	2.8931	4	0.131777	0.413301	0.318841	0.000210937	0.253308	-1.64909	0.596351
FN1	46.1508	29	3.20267	3	0.923015	0.457524	2.01742	0.00198872	0.253407	1.01251	0.596182
ANKRD1	2.24664	3	0.981303	2	0.0449328	0.140186	0.320523	0.112806	0.253849	-1.6415	0.595424
CNTNAP3	13.4849	21	7.64499	4	0.269698	1.09214	0.246944	3.53633e-08	0.254127	-2.01774	0.594949
TMEM39A	7.57569	20	0.400444	1	0.151514	0.0572064	2.64855	0.431649	0.25425	1.4052	0.594739
BMP7	1.41615	5	0.504577	2	0.0283231	0.0720825	0.392926	0.187852	0.254395	-1.34767	0.594491
MADD	12.2259	20	3.34318	4	0.244518	0.477597	0.511975	0.881841	0.254397	-0.965855	0.594488
RP11-514P8.6	6.30147	16	0.251606	1	0.126029	0.0359438	3.50629	0.0630564	0.254468	1.80995	0.594367
WSCD1	8.41338	6	7.72721	3	0.168268	1.10389	0.152432	9.07538e-05	0.254478	-2.71376	0.594349
[truncated: 5,559 more rows]

## Sheet: EGFR mutant vs. wild-type
Gene Name	Sum circRNA EGFR wt	# cell lines EGFR wt circRNA	Sum circRNA EGFR mut	# cell lines EGFR mut circRNA	AVE circRNA EGFR wt	AVE circRNA EGFR mut	fold change EGFR mut vs EGFR wt	F-test	T-test	log2 fold change	-log10 p-value		significance threshold (-log10 p)
		max 40		max 7									5.21937
ALG13	8.80755	19	5.98157	7	0.220189	0.854511	0.257678	0.0562462	8.04922e-06	-1.95636	5.09425		# significant
ST5	8.04253	13	7.12359	7	0.201063	1.01766	0.197575	0.287602	2.67831e-05	-2.33953	4.57214		0
ANKRD13A	26.243	32	13.0904	7	0.656075	1.87006	0.350832	0.185335	3.7473e-05	-1.51115	4.42628
FBXO34	7.5924	10	7.51519	7	0.18981	1.0736	0.176798	0.248611	3.94233e-05	-2.49983	4.40425
COPS2	26.5092	30	0.888764	3	0.66273	0.126966	5.21973	0.00250657	6.13368e-05	2.38398	4.21228
WASHC4	21.016	28	0.451851	1	0.5254	0.0645501	8.13941	0.0149925	8.95266e-05	3.02492	4.04805
KITLG	74.4157	36	32.1144	7	1.86039	4.58777	0.405511	0.640375	0.000135866	-1.30219	3.86689
PLCH1	28.5603	26	0.617462	2	0.714006	0.0882088	8.0945	0.000264695	0.000141016	3.01694	3.85073
MAML3	78.1557	35	3.01436	3	1.95389	0.430623	4.53737	0.00661999	0.000157536	2.18185	3.80262
IGF2BP1	44.1276	22	0.263939	1	1.10319	0.0377056	29.258	6.01282e-07	0.000160735	4.87076	3.79389
QSOX2	22.0046	32	9.91619	7	0.550115	1.4166	0.388335	0.0512089	0.000196256	-1.36463	3.70718
SFMBT2	696.992	35	12.0938	5	17.4248	1.72769	10.0856	4.73389e-06	0.000212929	3.33423	3.67176
MVP	50.2539	30	23.4917	7	1.25635	3.35595	0.374364	0.479189	0.000230928	-1.41749	3.63652
CEP120	22.4165	30	0.929507	4	0.560412	0.132787	4.2204	0.000689426	0.000247127	2.07738	3.60708
WBP2NL	2.64411	3	4.14382	6	0.0661027	0.591975	0.111665	0.0525978	0.000250251	-3.16275	3.60162
TRAF5	35.6176	31	1.49511	4	0.89044	0.213587	4.16899	0.00178062	0.00026614	2.0597	3.57489
ERCC8	22.6638	27	1.06382	4	0.566596	0.151974	3.72825	0.00205417	0.000339992	1.8985	3.46853
TBC1D22B	19.3673	25	0.49345	2	0.484183	0.0704929	6.86853	0.000566447	0.000350831	2.78	3.4549
ESYT2	773.581	40	279.052	7	19.3395	39.8646	0.485131	0.302684	0.000471607	-1.04356	3.32642
FASN	12.4034	24	0.273746	1	0.310084	0.0391066	7.9292	0.00407189	0.000472937	2.98718	3.3252
ATP8B1	44.5249	31	21.1023	7	1.11312	3.01461	0.369243	0.387194	0.000478358	-1.43736	3.32025
RP11-245J9.9	440.091	40	159.506	7	11.0023	22.7865	0.482842	0.0999864	0.000484144	-1.05038	3.31503
MSI2	12.0143	23	0.269653	1	0.300358	0.0385218	7.79708	0.00468933	0.000497603	2.96293	3.30312
CEP164	14.9509	20	0.262044	1	0.373773	0.0374348	9.98462	0.000470026	0.000521542	3.31971	3.28271
SSH1	38.9338	31	1.73742	4	0.973345	0.248203	3.92156	0.0261948	0.000606485	1.97143	3.21718
ATAD3B	15.0894	25	0.514185	2	0.377234	0.073455	5.13559	0.00696377	0.000622575	2.36053	3.20581
CABYR	259.788	38	5.47954	4	6.49469	0.782791	8.29684	3.05758e-06	0.000641896	3.05256	3.19254
RBSN	12.4657	19	0.250246	1	0.311642	0.0357494	8.71739	0.00112366	0.000764595	3.1239	3.11657
ZHX3	31.6656	31	14.2177	6	0.791639	2.0311	0.389759	0.0809159	0.000788003	-1.35935	3.10347
ZNF710	22.9557	24	0.569023	2	0.573893	0.081289	7.05991	0.000333794	0.000815512	2.81965	3.08857
PRKD2	12.8313	19	0.262044	1	0.320784	0.0374348	8.56912	0.00120149	0.00085725	3.09915	3.06689
SMARCD1	27.7993	29	1.21565	3	0.694982	0.173665	4.00186	0.0146212	0.00088455	2.00067	3.05328
NDUFV1	23.3422	21	0.357904	1	0.583555	0.0511291	11.4134	0.00010593	0.00111272	3.51265	2.95361
PKD1	16.2336	31	0.957211	4	0.405841	0.136744	2.96788	0.0194486	0.00114124	1.56943	2.94262
DAGLB	204.676	39	70.1059	7	5.1169	10.0151	0.510918	0.889512	0.00114327	-0.968838	2.94185
ANKRD18B	12.5415	17	0.229511	1	0.313539	0.0327873	9.5628	0.000385637	0.00117643	3.25743	2.92943
UBE2E3	12.2187	21	0.250246	1	0.305466	0.0357494	8.54465	0.000930983	0.00124568	3.09502	2.90459
GMIP	42.0777	34	13.3758	7	1.05194	1.91083	0.550517	0.0238176	0.00135065	-0.861141	2.86946
ZSCAN26	17.044	24	0.784988	3	0.426101	0.112141	3.79968	0.00619388	0.00154479	1.92588	2.81113
SAE1	67.8424	36	4.71709	7	1.69606	0.67387	2.5169	0.000695394	0.00155994	1.33165	2.80689
EXT2	36.441	33	13.8328	7	0.911026	1.97612	0.461017	0.277402	0.00172032	-1.11711	2.76439
ZNF131	345.29	40	34.1651	7	8.63225	4.88072	1.76864	0.000860619	0.00185253	0.822641	2.73224
TRIO	1377.49	40	531.798	7	34.4373	75.9711	0.453294	0.327584	0.00192738	-1.14148	2.71503
HACD3	24.0714	17	0.269653	1	0.601786	0.0385218	15.622	8.50223e-06	0.00193947	3.9655	2.71232
TAF2	235.383	40	24.1869	7	5.88459	3.45527	1.70308	0.0407842	0.00198862	0.768144	2.70145
FBXO32	2.3403	5	2.04344	5	0.0585076	0.29192	0.200424	0.105467	0.0019999	-2.31888	2.69899
NAV2	44.5913	33	20.4389	7	1.11478	2.91984	0.381796	0.0791453	0.0020356	-1.38913	2.69131
SMARCC2	21.2604	26	0.814548	2	0.531509	0.116364	4.56764	0.0229718	0.00206539	2.19145	2.685
EVA1A	29.8387	18	19.2488	6	0.745968	2.74983	0.271277	0.0513346	0.00217618	-1.88216	2.66231
RIC1	34.0532	30	14.4204	7	0.851331	2.06005	0.413257	0.108412	0.00220726	-1.27489	2.65615
DECR1	20.7309	26	0.547492	1	0.518273	0.0782132	6.62641	0.00672443	0.00224335	2.72823	2.6491
ACLY	25.374	32	1.1142	3	0.634351	0.159171	3.98534	0.0108307	0.00226946	1.9947	2.64408
ATP2B4	63.2062	36	26.3111	7	1.58015	3.75872	0.420397	0.105205	0.00231712	-1.25018	2.63505
SEC11A	120.878	40	34.5959	7	3.02195	4.94227	0.61145	0.559495	0.00233022	-0.709695	2.6326
PRH1-PRR4	45.2134	31	2.15063	4	1.13033	0.307233	3.67908	0.00267132	0.00238219	1.87935	2.62302
RP11-674E16.5	14.0527	24	6.07855	7	0.351318	0.868364	0.404575	0.371693	0.0024249	-1.30552	2.61531
CTD-2116N17.1	20.5181	23	0.759517	2	0.512953	0.108502	4.72758	0.00842074	0.00252104	2.2411	2.59842
UBTD2	9.45389	16	0.225925	1	0.236347	0.0322751	7.32291	0.00204864	0.00256503	2.87242	2.59091
SMAD2	541.405	39	29.9631	7	13.5351	4.28044	3.16209	0.000559966	0.00259774	1.66088	2.5854
ROCK1	126.014	39	11.6713	7	3.15035	1.66733	1.88946	0.0276825	0.00273512	0.917975	2.56302
KYNU	93.9842	23	1.63651	4	2.34961	0.233787	10.0502	4.7342e-07	0.00273748	3.32915	2.56265
ACOX1	30.562	27	1.8326	4	0.764049	0.2618	2.91845	0.0122002	0.00285037	1.5452	2.5451
TCOF1	9.54926	20	0.263939	1	0.238732	0.0377056	6.33147	0.00833553	0.00297851	2.66254	2.526
BABAM1	117.012	38	43.5829	7	2.92529	6.22613	0.469841	0.0581597	0.00305377	-1.08976	2.51516
RALGAPA2	34.5785	33	2.33745	6	0.864463	0.333922	2.58882	0.00360985	0.00307184	1.37229	2.5126
TMC7	25.1076	24	0.910375	3	0.627691	0.130054	4.8264	0.000335396	0.00311594	2.27095	2.50641
RGL3	46.7871	30	21.5426	7	1.16968	3.07752	0.380072	0.0572663	0.00314257	-1.39566	2.50272
SS18	90.2281	37	6.89813	6	2.2557	0.985447	2.28902	0.0101986	0.00315421	1.19473	2.50111
KIF13B	9.7413	18	0.234719	1	0.243533	0.0335313	7.26284	0.00180702	0.00318833	2.86053	2.49644
PFKFB4	20.2412	23	13.3085	7	0.506029	1.90121	0.266162	0.176232	0.00326083	-1.90962	2.48667
SERINC3	51.71	38	17.8571	7	1.29275	2.55101	0.50676	0.181718	0.0035934	-0.980627	2.44449
ABCC2	91.6616	25	3.48874	4	2.29154	0.498392	4.59787	0.000837522	0.00367163	2.20097	2.43514
SLC7A6	173.458	40	59.0682	7	4.33644	8.43831	0.5139	0.0970956	0.00371514	-0.960442	2.43002
DCUN1D5	9.92353	17	0.263939	1	0.248088	0.0377056	6.57962	0.00412244	0.00373275	2.71801	2.42797
PALLD	101.188	36	39.912	7	2.52969	5.70171	0.443672	0.11611	0.00381522	-1.17243	2.41848
NPAS2	71.9288	30	3.98055	4	1.79822	0.56865	3.16226	0.00788179	0.00384721	1.66096	2.41485
CAMK1D	9.68974	17	4.82346	6	0.242243	0.689066	0.351553	0.296201	0.00386528	-1.50818	2.41282
SPTAN1	36.1963	34	14.3297	7	0.904908	2.04709	0.442045	0.291634	0.00389465	-1.17773	2.40953
PTER	18.7195	21	0.872661	3	0.467988	0.124666	3.75394	0.00390971	0.00396287	1.9084	2.40199
FUBP3	5.2142	13	3.01154	6	0.130355	0.43022	0.302996	0.154813	0.00397115	-1.72263	2.40108
ANTXR1	26.9646	18	0.229511	1	0.674115	0.0327873	20.5602	8.4769e-07	0.00405882	4.36179	2.3916
ALDH5A1	8.07941	17	0.218616	1	0.201985	0.0312309	6.46748	0.00450918	0.00406551	2.6932	2.39089
LGMN	16.8006	28	0.893682	3	0.420016	0.127669	3.28988	0.016934	0.00410838	1.71804	2.38633
EVC2	61.641	19	1.7222	2	1.54103	0.246028	6.26361	0.0016799	0.00421284	2.64699	2.37542
ZNF418	15.8594	22	7.70227	6	0.396484	1.10032	0.360334	0.38429	0.00427258	-1.47259	2.36931
HMMR	18.764	25	0.746494	2	0.4691	0.106642	4.39883	0.019654	0.00429664	2.13712	2.36687
SHOC2	263.559	40	29.8171	7	6.58898	4.25958	1.54686	0.0164829	0.00433352	0.629343	2.36316
IL20RB	38.3314	29	18.6709	7	0.958284	2.66727	0.359276	0.412363	0.00436679	-1.47684	2.35984
COMMD1	48.0669	34	2.53448	4	1.20167	0.362068	3.31891	0.0199552	0.00452053	1.73071	2.34481
TC2N	127.788	28	4.27868	6	3.19469	0.611241	5.22657	4.14022e-06	0.00464951	2.38586	2.33259
DISC1	82.3086	28	3.14743	5	2.05772	0.449632	4.57644	0.000126438	0.00466073	2.19423	2.33155
CHEK2	172.668	40	17.9711	7	4.31671	2.5673	1.68142	0.001191	0.00469694	0.749679	2.32819
FGFR1OP	120.888	40	10.394	7	3.0222	1.48486	2.03535	0.0221921	0.00473114	1.02528	2.32503
IFNAR2	12.5542	17	0.281873	1	0.313854	0.0402676	7.79421	0.000656085	0.00487219	2.9624	2.31228
PCF11	24.6768	27	1.11438	4	0.616921	0.159197	3.8752	0.000221464	0.00500432	1.95427	2.30066
KDM4C	233.993	38	91.4481	7	5.84981	13.064	0.447781	0.493816	0.00504672	-1.15913	2.29699
VPS4B	12.606	19	0.499232	2	0.315151	0.0713189	4.4189	0.00517206	0.00505992	2.14369	2.29586
ETS1	67.2139	30	33.1366	7	1.68035	4.7338	0.354968	0.15393	0.00507521	-1.49424	2.29455
CDR1-AS	152.318	26	1.06366	2	3.80796	0.151951	25.0604	3.47027e-08	0.00509627	4.64734	2.29275
DPY19L2	31.386	25	0.950578	2	0.784649	0.135797	5.77811	0.000829617	0.0051332	2.5306	2.28961
RP11-548K23.11	11.6774	20	5.73662	7	0.291936	0.819518	0.356229	0.811254	0.00520691	-1.48912	2.28342
RIT1	48.0518	30	2.27179	3	1.20129	0.324542	3.70151	0.0139135	0.00521125	1.88811	2.28306
SLC29A2	16.4043	20	0.534463	2	0.410109	0.0763519	5.3713	0.000623187	0.00529397	2.42527	2.27622
MCTP1	55.7315	33	2.56462	3	1.39329	0.366374	3.80291	0.00773547	0.00530405	1.9271	2.27539
VWDE	32.8167	26	0.697898	2	0.820418	0.0996998	8.22889	3.74978e-05	0.00544357	3.0407	2.26412
ATF7IP	151.375	38	41.9532	7	3.78437	5.99331	0.631432	0.0408323	0.00546011	-0.663301	2.2628
PDCD10	16.0822	21	0.836236	3	0.402054	0.119462	3.36553	0.00677553	0.00568411	1.75083	2.24534
DET1	12.2621	22	0.531696	2	0.306553	0.0759566	4.0359	0.0132511	0.00572049	2.01289	2.24257
UHRF2	176.521	40	58.2047	7	4.41301	8.31495	0.530732	0.0732166	0.00572731	-0.913944	2.24205
CACNA2D1	35.2801	24	1.38052	3	0.882003	0.197218	4.47223	0.0028831	0.00579731	2.161	2.23677
PHF6	29.5688	29	2.12286	6	0.739221	0.303266	2.43753	0.00331698	0.00588041	1.28542	2.23059
DNAH11	21.9566	20	24.2162	6	0.548915	3.45945	0.158671	0.00466238	0.00595589	-2.65589	2.22505
VPS35	66.885	35	22.5808	7	1.67213	3.22582	0.518356	0.985733	0.00601047	-0.947984	2.22109
SFXN4	9.14832	20	0.263939	1	0.228708	0.0377056	6.06563	0.00560611	0.00613352	2.60066	2.21229
MRPL3	37.731	35	13.2097	7	0.943276	1.8871	0.499854	0.951689	0.00643269	-1.00042	2.19161
GRAMD1B	93.9915	24	3.86605	3	2.34979	0.552293	4.25461	0.00320203	0.00649678	2.08903	2.1873
SNX29	31.6828	32	12.6533	7	0.792071	1.80762	0.438185	0.189897	0.00663153	-1.19039	2.17839
RFX3	31.6326	30	2.4747	5	0.790816	0.353529	2.23692	0.0208317	0.00666857	1.16151	2.17597
SENP2	103.924	39	32.6079	7	2.59809	4.65827	0.557737	0.0630482	0.00677751	-0.842342	2.16893
POF1B	46.0874	23	0.693742	2	1.15219	0.0991059	11.6258	2.43194e-06	0.00693864	3.53926	2.15873
TMTC1	79.2971	17	0.234719	1	1.98243	0.0335313	59.1217	7.80635e-10	0.00695069	5.88562	2.15797
TXNDC16	88.4993	37	33.2243	7	2.21248	4.74633	0.466146	0.228826	0.00701383	-1.10115	2.15404
ARSB	25.4965	28	1.51197	4	0.637413	0.215996	2.95104	0.0064926	0.00759833	1.56122	2.11928
APPL2	24.4003	27	1.36885	3	0.610007	0.19555	3.11944	0.0298527	0.0076467	1.64129	2.11653
ZDHHC9	4.42664	10	2.89812	6	0.110666	0.414018	0.267298	0.35598	0.00767079	-1.90348	2.11516
DLEU2	20.4723	26	0.777004	2	0.511808	0.111001	4.61086	0.00446294	0.00768614	2.20504	2.11429
AASDH	8.26356	14	4.02373	6	0.206589	0.574818	0.359399	0.632835	0.0077074	-1.47634	2.11309
EDEM3	33.4626	32	2.65743	6	0.836564	0.379633	2.20361	0.00130252	0.00775253	1.13987	2.11056
RNF8	14.275	20	0.357904	1	0.356874	0.0511291	6.97986	0.00107331	0.00778944	2.8032	2.10849
FAM193B	19.3388	20	9.54802	7	0.483471	1.364	0.35445	0.245212	0.00789458	-1.49635	2.10267
CCDC122	14.4296	20	0.552398	2	0.36074	0.0789139	4.57131	0.00192865	0.00795583	2.19261	2.09931
NUP133	88.7564	39	29.6013	7	2.21891	4.22876	0.524719	0.879124	0.0079602	-0.930384	2.09908
EFCAB13	245.88	37	22.1831	7	6.14701	3.16901	1.93972	0.00745024	0.00796329	0.95585	2.09891
SFXN1	29.6688	30	12.1787	6	0.74172	1.73982	0.42632	0.425673	0.00805103	-1.22999	2.09415
CATSPERB	51.8912	21	0.666265	2	1.29728	0.0951808	13.6297	5.39407e-07	0.00812746	3.76868	2.09005
PRDM2	187.983	39	17.2537	7	4.69958	2.46482	1.90666	0.0146319	0.00825314	0.931049	2.08338
CEP290	72.5539	39	7.87945	7	1.81385	1.12564	1.6114	0.00115968	0.00864778	0.688313	2.0631
PRELID3A	12.8939	17	0.273746	1	0.322348	0.0391066	8.24279	0.000243829	0.00869349	3.04313	2.06081
ATG4C	64.9486	37	5.81148	6	1.62372	0.830212	1.95579	0.0140105	0.0087537	0.967748	2.05781
NDFIP2	62.6641	31	3.87006	5	1.5666	0.552865	2.83361	0.0011177	0.00879175	1.50264	2.05592
VPS13C	397.565	39	33.0821	7	9.93914	4.72601	2.10307	0.00876557	0.00887695	1.0725	2.05174
PLK4	8.78507	15	4.5977	6	0.219627	0.656814	0.334382	0.284904	0.00893126	-1.58043	2.04909
ANKRD13C	358.692	40	100.563	7	8.9673	14.3661	0.624198	0.410074	0.00893389	-0.679925	2.04896
RP11-512M8.12	14.3679	23	0.666265	2	0.359199	0.0951808	3.77386	0.0219344	0.00896506	1.91604	2.04745
TLE1	17.4664	25	8.23712	7	0.43666	1.17673	0.371079	0.281109	0.00901418	-1.4302	2.04507
PIP4K2A	34.2857	30	12.1796	7	0.857142	1.73994	0.492627	0.969128	0.00952454	-1.02143	2.02116
TPST2	4.11333	10	2.33139	5	0.102833	0.333056	0.308757	0.284908	0.0095332	-1.69546	2.02076
FRY	13.4358	20	0.694788	3	0.335895	0.0992554	3.38415	0.00327466	0.00973256	1.75879	2.01177
TPRG1	30.5145	25	1.3605	3	0.762862	0.194358	3.92504	0.00208339	0.00974884	1.97271	2.01105
PTBP3	663.261	40	191.338	7	16.5815	27.334	0.606626	0.208595	0.0098133	-0.721121	2.00818
GNE	22.9788	25	1.31452	4	0.574469	0.187788	3.05913	0.00688036	0.00984137	1.61312	2.00694
TMEM189	22.3657	23	10.0811	6	0.559142	1.44016	0.388251	0.146863	0.0101504	-1.36494	1.99351
AASS	51.3891	27	1.98231	3	1.28473	0.283187	4.53668	0.000524295	0.0102917	2.18164	1.98751
TMEM230	18.782	25	1.04256	3	0.469551	0.148938	3.15267	0.0289258	0.0103227	1.65657	1.9862
TTLL1	13.1093	19	0.496566	2	0.327731	0.0709381	4.61997	0.0013204	0.0104043	2.20788	1.98279
PGM5P2	6.35217	9	4.15775	6	0.158804	0.593964	0.267364	0.180131	0.0107952	-1.90313	1.96677
CLIP1	308.624	40	88.0228	7	7.71561	12.5747	0.613583	0.757689	0.0107963	-0.704671	1.96673
BBS9	214.876	39	76.0348	7	5.37191	10.8621	0.494554	0.314433	0.0110869	-1.0158	1.95519
RALB	35.5789	31	13.0636	7	0.889472	1.86623	0.476615	0.398958	0.0110978	-1.0691	1.95476
TTC39C	710.931	40	51.9082	7	17.7733	7.41546	2.39679	0.00777226	0.0111065	1.2611	1.95442
RAB11FIP2	10.265	14	0.234719	1	0.256624	0.0335313	7.65328	0.000343301	0.011113	2.93608	1.95417
ZYG11B	10.9437	17	0.35381	1	0.273592	0.0505443	5.41291	0.00937792	0.0111271	2.4364	1.95362
RFC2	33.6418	35	11.5078	7	0.841044	1.64397	0.511593	0.409134	0.0111669	-0.96693	1.95207
PABPC1L	40.2174	33	3.87806	7	1.00544	0.554009	1.81484	0.00356746	0.0113104	0.859841	1.94652
AGRN	11.7089	17	0.517301	2	0.292722	0.0739002	3.96105	0.00622863	0.0114083	1.98588	1.94278
ZBTB24	10.4749	18	0.444542	2	0.261872	0.0635059	4.12359	0.00381784	0.01141	2.0439	1.94271
GATAD2A	59.8808	35	21.6958	7	1.49702	3.09941	0.483002	0.117298	0.0115906	-1.0499	1.9359
AC007192.4	27.1694	29	17.1215	7	0.679234	2.44592	0.2777	0.0116375	0.0116431	-1.8484	1.93393
L3MBTL2	3.29939	6	2.54364	5	0.0824848	0.363378	0.226995	0.245467	0.0116971	-2.13927	1.93192
GGT7	7.52584	14	0.225925	1	0.188146	0.0322751	5.82946	0.00373578	0.0117362	2.54336	1.93047
PAPPA	80.6016	22	2.38881	4	2.01504	0.341259	5.90473	2.62243e-05	0.0120887	2.56187	1.91762
COL24A1	13.7862	18	0.500489	2	0.344656	0.0714985	4.82046	0.00077777	0.0121785	2.26917	1.91441
C7orf26	15.0192	21	0.860352	3	0.37548	0.122907	3.05498	0.0121985	0.0122836	1.61116	1.91067
RNFT2	16.6593	21	0.765713	3	0.416482	0.109388	3.80739	0.000685084	0.0124147	1.9288	1.90607
WDYHV1	6.23789	12	3.34998	5	0.155947	0.478568	0.325862	0.136004	0.0124519	-1.61767	1.90476
CDC7	11.3104	17	0.270524	1	0.282759	0.0386463	7.31658	0.000436433	0.0125064	2.87117	1.90287
EHD2	48.8028	30	20.2132	7	1.22007	2.8876	0.42252	0.176284	0.0126112	-1.24291	1.89924
PPP2R3A	49.2181	32	22.9078	6	1.23045	3.27254	0.375993	0.21529	0.012649	-1.41122	1.89795
KMT2A	73.2998	38	8.11386	7	1.8325	1.15912	1.58093	0.00635947	0.0130059	0.660776	1.88586
FTSJ2	0.516109	2	1.45111	5	0.0129027	0.207301	0.0622414	0.000208639	0.0130871	-4.00598	1.88316
ATP2A1	9.52168	18	0.341285	1	0.238042	0.0487549	4.88242	0.0269973	0.0138532	2.2876	1.85845
ADGRV1	70.6529	24	2.32105	2	1.76632	0.331579	5.327	0.00177389	0.013943	2.41332	1.85564
ZMYM5	36.4433	32	2.42637	4	0.911082	0.346624	2.62844	0.0320226	0.0139865	1.39421	1.85429
ACACA	320.463	40	39.7796	7	8.01157	5.6828	1.40979	0.00624283	0.0140563	0.495482	1.85213
RB1	23.347	25	1.5134	4	0.583675	0.216199	2.69971	0.0106598	0.0142018	1.4328	1.84766
LRRC37B	14.47	24	1.02857	4	0.36175	0.146938	2.46192	0.0134204	0.0142175	1.29978	1.84718
CAMLG	129.022	37	42.3772	7	3.22554	6.05389	0.532805	0.190921	0.0142581	-0.90832	1.84594
PHTF2	24.5995	29	7.96125	7	0.614987	1.13732	0.540733	0.617768	0.0143224	-0.887013	1.84398
CCDC40	160.592	37	12.0045	6	4.0148	1.71493	2.34109	0.00303535	0.0146997	1.22718	1.83269
RNF34	55.2668	35	18.8268	7	1.38167	2.68954	0.513719	0.112635	0.0147135	-0.96095	1.83228
RIDA	1.52772	4	1.24842	4	0.0381931	0.178346	0.214152	0.268136	0.0149049	-2.22329	1.82667
SUPT3H	77.1107	36	5.61056	7	1.92777	0.801509	2.40517	0.000740407	0.0149602	1.26614	1.82506
CYP24A1	14117	39	115.817	7	352.924	16.5453	21.3308	5.20668e-11	0.0150986	4.41487	1.82106
AC108488.3	7.20684	16	0.250246	1	0.180171	0.0357494	5.03983	0.0140439	0.015211	2.33337	1.81784
ZNF577	55.0181	30	20.816	7	1.37545	2.97372	0.462537	0.946312	0.015303	-1.11236	1.81522
BMPR1B	41.1749	26	1.42122	3	1.02937	0.203032	5.07	0.000139231	0.0153346	2.34199	1.81433
UBE2Z	31.7649	30	2.19096	4	0.794123	0.312994	2.53718	0.0189105	0.0154654	1.34323	1.81064
ZEB1	289.926	33	20.03	7	7.24816	2.86143	2.53305	0.000986171	0.0155311	1.34088	1.8088
L3MBTL4	89.4402	22	1.78602	1	2.23601	0.255145	8.76365	8.54229e-05	0.0155748	3.13153	1.80758
HECTD2	71.5839	31	5.1512	6	1.7896	0.735886	2.43189	0.0140776	0.0156147	1.28208	1.80647
EEF2K	76.486	36	26.1614	7	1.91215	3.73734	0.511634	0.10794	0.0156662	-0.966816	1.80504
SAFB	81.9597	38	26.057	7	2.04899	3.72243	0.550445	0.19006	0.0158708	-0.861331	1.7994
SLC27A4	10.1165	14	5.13027	6	0.252912	0.732895	0.345086	0.340545	0.0159204	-1.53497	1.79804
DNAJA3	12.012	16	0.492362	2	0.3003	0.0703375	4.26942	0.00179654	0.0160697	2.09404	1.79399
ADAM23	11.5971	16	0.273746	1	0.289929	0.0391066	7.4138	0.0002977	0.0160829	2.89021	1.79363
CDC42SE2	7.6992	16	0.270524	1	0.19248	0.0386463	4.98055	0.0147595	0.0161676	2.31631	1.79136
NFIC	62.9668	34	4.39603	6	1.57417	0.628004	2.50662	0.0398123	0.0165038	1.32575	1.78242
ZCCHC6	196.25	37	69.0837	7	4.90624	9.8691	0.497131	0.0646152	0.0166194	-1.0083	1.77938
UMPS	5.41408	15	2.45167	6	0.135352	0.350239	0.386456	0.406622	0.0166604	-1.37162	1.77831
PITPNC1	12.0791	15	0.350407	1	0.301977	0.0500581	6.03254	0.00168258	0.016672	2.59277	1.77801
FRMD3	16.4959	20	0.665008	2	0.412398	0.0950012	4.34097	0.00152419	0.0168064	2.11802	1.77453
SHROOM2	20.6877	23	1.19225	3	0.517193	0.170321	3.03657	0.0106045	0.0170162	1.60244	1.76914
SEC22C	8.66765	13	0.250246	1	0.216691	0.0357494	6.06139	0.00155364	0.0171289	2.59965	1.76627
STAMBPL1	34.373	22	2.05442	4	0.859324	0.293489	2.92796	0.00143263	0.0173863	1.5499	1.75979
UBR5	517.959	40	144.006	7	12.949	20.5723	0.629438	0.156489	0.0174526	-0.667863	1.75814
RSPO3	27.7935	12	0.229511	1	0.694838	0.0327873	21.1923	1.98176e-07	0.017543	4.40547	1.7559
RP1-45P21.3	7.33415	12	0.218616	1	0.183354	0.0312309	5.87091	0.00200413	0.0177726	2.55358	1.75025
FLOT1	10.3213	14	0.250246	1	0.258033	0.0357494	7.21783	0.000324013	0.0180343	2.85156	1.7439
C2CD5	112.113	40	13.0231	7	2.80283	1.86044	1.50654	0.000288495	0.018161	0.591239	1.74086
MKL1	49.0305	30	18.2124	7	1.22576	2.60178	0.471126	0.970117	0.0183415	-1.08582	1.73656
SMARCB1	9.99581	18	3.03713	7	0.249895	0.433876	0.575959	0.0120158	0.0184446	-0.795961	1.73413
IRAK3	44.298	16	0.250246	1	1.10745	0.0357494	30.9781	1.71692e-08	0.018575	4.95318	1.73107
MARVELD2	10.4741	19	4.76552	6	0.261851	0.680789	0.38463	0.0602722	0.018646	-1.37846	1.72941
TBC1D31	812.504	40	100.539	7	20.3126	14.3627	1.41427	0.00237578	0.0187558	0.500053	1.72686
CSE1L	345.628	40	75.415	7	8.64069	10.7736	0.802027	0.000486534	0.0187829	-0.318278	1.72624
PLA2G4A	51.7665	23	3.0198	4	1.29416	0.4314	2.99991	0.00118978	0.0189242	1.58492	1.72298
CTC-435M10.3	6.30572	13	0.218616	1	0.157643	0.0312309	5.04766	0.00928432	0.0189968	2.33562	1.72132
PDIA3	99.3173	37	10.5819	7	2.48293	1.5117	1.64248	0.00525865	0.0195047	0.715876	1.70986
POLR2D	9.87927	17	0.35381	1	0.246982	0.0505443	4.88644	0.0133387	0.0195931	2.28878	1.7079
ITGB1BP1	13.3847	16	0.614345	2	0.334617	0.0877636	3.81271	0.00493516	0.0197831	1.93082	1.70371
JUP	10.3506	21	0.525983	2	0.258766	0.0751404	3.44376	0.0172831	0.0198788	1.78399	1.70161
SUFU	10.8568	19	0.543399	2	0.271419	0.0776284	3.49639	0.01354	0.0199886	1.80587	1.69922
TFDP1	35.3386	32	12.1412	7	0.883464	1.73445	0.509361	0.0921632	0.0201058	-0.973238	1.69668
RAB27A	50.7748	35	23.4506	7	1.26937	3.35008	0.378907	0.0284357	0.0201306	-1.40008	1.69614
SKP1	41.1876	34	3.20164	5	1.02969	0.457377	2.25129	0.00688203	0.0201747	1.17075	1.69519
MSRB3	17.0232	19	0.561233	1	0.425579	0.0801761	5.30805	0.00461699	0.0203812	2.40818	1.69077
SH2D4A	33.0683	26	12.5777	7	0.826706	1.79681	0.460096	0.095492	0.0206127	-1.11999	1.68586
OSBPL5	8.29998	14	0.270524	1	0.2075	0.0386463	5.36919	0.00398039	0.0207125	2.42471	1.68377
CCDC102B	9.77077	14	0.270524	1	0.244269	0.0386463	6.32064	0.000827498	0.0208368	2.66007	1.68117
CPQ	13.7767	20	0.524088	1	0.344417	0.0748697	4.60022	0.0277106	0.0210664	2.2017	1.67641
FERMT2	29.0471	31	9.8872	7	0.726176	1.41246	0.514123	0.519835	0.0210934	-0.959815	1.67585
AHRR	27.0308	24	1.38335	3	0.675771	0.197621	3.41953	0.00497629	0.021107	1.7738	1.67557
UGCG	45.6657	31	26.4208	7	1.14164	3.7744	0.30247	0.0285829	0.0213069	-1.72514	1.67148
CCDC7	376.439	39	28.3532	6	9.41097	4.05045	2.32343	0.0484442	0.0213655	1.21626	1.67029
ZNF586	9.06933	20	0.484965	2	0.226733	0.0692807	3.27267	0.0361327	0.0213688	1.71047	1.67022
CCDC134	300.977	40	87.3566	7	7.52442	12.4795	0.602942	0.37668	0.0214283	-0.72991	1.66901
GAPVD1	187.487	40	52.5881	7	4.68716	7.51259	0.623908	0.993208	0.0214916	-0.680595	1.66773
GTF2I	223.9	39	66.3376	7	5.59749	9.4768	0.590652	0.279232	0.0216471	-0.759619	1.6646
TMEM50A	42.401	36	12.8075	7	1.06002	1.82964	0.579363	0.520297	0.0216765	-0.78746	1.66401
CPS1	108.08	16	1.22181	2	2.70201	0.174544	15.4804	2.80353e-07	0.0216806	3.95237	1.66393
KLHL22	28.1834	25	1.41702	3	0.704586	0.202431	3.48061	0.00352646	0.02176	1.79934	1.66234
MLF2	14.1311	15	0.357904	1	0.353278	0.0511291	6.90952	0.000366791	0.0218786	2.78859	1.65998
XRCC3	6.92105	15	0.250246	1	0.173026	0.0357494	4.83997	0.0122675	0.0218985	2.275	1.65959
CMTM7	0.815937	2	0.843059	3	0.0203984	0.120437	0.16937	0.050956	0.0219695	-2.56175	1.65818
THOC6	1.45169	4	1.07228	4	0.0362923	0.153183	0.236921	0.302128	0.0220438	-2.07752	1.65671
TNS4	56.131	20	3.26337	4	1.40327	0.466196	3.01005	0.00127385	0.0220871	1.58979	1.65586
WDR26	64.0008	39	7.09577	7	1.60002	1.01368	1.57843	0.0106841	0.0222173	0.658486	1.65331
SLCO5A1	5.17387	7	3.54395	5	0.129347	0.506278	0.255485	0.165202	0.022553	-1.96869	1.6468
CCT6P1	30.6316	30	11.0014	7	0.765791	1.57163	0.48726	0.444092	0.0225557	-1.03724	1.64674
UBASH3B	43.7268	23	18.3923	6	1.09317	2.62747	0.416055	0.224922	0.0225578	-1.26515	1.6467
GPHN	77.4497	36	7.2671	6	1.93624	1.03816	1.86508	0.00953552	0.0225854	0.899235	1.64617
DCAF12	10.854	21	4.50816	6	0.27135	0.644023	0.421335	0.391945	0.0226477	-1.24696	1.64498
DCBLD1	42.7511	35	4.34838	7	1.06878	0.621198	1.72051	0.00141584	0.023059	0.782838	1.63716
ZCCHC4	44.1201	34	13.8366	7	1.103	1.97665	0.558015	0.265998	0.0230937	-0.841624	1.63651
TBL1X	26.1159	27	1.953	4	0.652898	0.279001	2.34013	0.0447454	0.0231589	1.22659	1.63528
VASP	54.1919	37	17.1154	7	1.3548	2.44506	0.554095	0.199683	0.0232536	-0.851795	1.63351
EXOSC9	14.5136	20	0.719106	2	0.362839	0.102729	3.53199	0.0121657	0.0232744	1.82048	1.63312
TRPV1	10.3858	20	4.59391	6	0.259646	0.656273	0.395637	0.0884121	0.0234139	-1.33775	1.63053
SNTB2	119.609	40	35.1728	7	2.99023	5.02468	0.595109	0.975682	0.0234354	-0.748774	1.63013
HPRT1	136.15	39	38.6477	7	3.40376	5.5211	0.6165	0.983223	0.0236033	-0.697828	1.62703
PREX1	11.8812	12	0.280616	1	0.297029	0.040088	7.40942	0.000191241	0.0236185	2.88936	1.62675
ETNK1	144.548	39	16.5601	7	3.61369	2.36573	1.52752	0.00507809	0.0239515	0.611187	1.62067
PLEKHH2	26.859	21	1.13901	2	0.671475	0.162716	4.12667	0.00281567	0.0239667	2.04498	1.62039
PAM	38.9225	30	13.0638	7	0.973063	1.86626	0.521398	0.863742	0.0239897	-0.939543	1.61998
LARP4B	324.621	39	38.5486	7	8.11552	5.50695	1.47369	0.00166397	0.0243239	0.55943	1.61397
PLEKHA1	23.0299	31	1.02277	2	0.575748	0.14611	3.94051	0.116099	0.0243256	1.97838	1.61394
CBWD3	2.20852	7	1.34356	4	0.0552129	0.191937	0.287662	0.100052	0.0244135	-1.79755	1.61237
RP11-464F9.1	9.20979	20	0.508465	2	0.230245	0.0726379	3.16976	0.0499897	0.0245621	1.66437	1.60973
QRICH2	64.4234	35	4.65612	6	1.61058	0.665159	2.42135	0.00305126	0.0246554	1.27581	1.60809
POM121C	21.9854	25	1.78179	5	0.549634	0.254542	2.15931	0.00571074	0.0246839	1.11057	1.60759
CUBN	7.72617	15	0.225925	1	0.193154	0.0322751	5.98463	0.00107139	0.0247407	2.58126	1.60659
HDAC4	137.078	38	9.39481	6	3.42695	1.34212	2.55339	0.000221696	0.0247518	1.35241	1.60639
SNTB1	7.54484	11	0.229511	1	0.188621	0.0327873	5.75286	0.00153773	0.0247838	2.52428	1.60583
ADAMTSL5	23.2393	26	8.10788	7	0.580983	1.15827	0.501596	0.27556	0.024814	-0.995402	1.6053
INTS1	39.0245	28	2.07435	3	0.975611	0.296336	3.29225	0.0445362	0.0248432	1.71907	1.60479
PLCB1	18.6003	21	0.902739	2	0.465009	0.128963	3.60576	0.00784007	0.0252916	1.8503	1.59702
MGLL	19.1806	23	18.4008	6	0.479516	2.62869	0.182417	1.15052e-05	0.0253114	-2.45469	1.59668
RASAL2	40.9501	33	13.3794	7	1.02375	1.91134	0.535619	0.254793	0.0255599	-0.900721	1.59244
FNBP1L	25.3933	26	1.92217	5	0.634832	0.274596	2.31188	0.00571547	0.0256268	1.20907	1.5913
POLR3F	11.1674	15	0.263939	1	0.279186	0.0377056	7.40438	0.000173222	0.0257166	2.88838	1.58979
TXLNG2P	41.0592	13	0.977852	2	1.02648	0.139693	7.34811	2.49315e-05	0.0257409	2.87737	1.58938
STAM2	39.593	31	3.42671	6	0.989825	0.48953	2.02199	0.0053653	0.0259687	1.01578	1.58555
RP11-58B17.1	3.10372	8	1.7384	5	0.077593	0.248343	0.312443	0.147083	0.0261365	-1.67834	1.58275
HAUS1	32.4549	30	2.96697	6	0.811373	0.423853	1.91428	0.0172962	0.0261432	0.936802	1.58264
ABHD5	2.62789	5	1.83293	4	0.0656972	0.261848	0.250898	0.0772926	0.0262367	-1.99483	1.58109
RP11-468E2.1	37.382	34	13.1889	7	0.93455	1.88413	0.496013	0.0813643	0.026247	-1.01155	1.58092
SF3B3	208.768	40	57.1837	7	5.2192	8.1691	0.638896	0.249505	0.0263015	-0.646348	1.58002
METTL8	76.9467	37	23.5705	7	1.92367	3.36721	0.571294	0.998056	0.0263251	-0.807694	1.57963
GTSE1	11.6527	20	4.9379	6	0.291317	0.705414	0.412974	0.422182	0.0271239	-1.27588	1.56665
GNPDA2	12.1275	18	0.544555	2	0.303187	0.0777936	3.89732	0.00211154	0.0272594	1.96248	1.56448
SPATA5	130.763	38	41.0189	7	3.26907	5.85985	0.557877	0.346666	0.0272745	-0.841981	1.56424
PSD4	3.00895	7	1.95568	4	0.0752238	0.279383	0.269249	0.0915664	0.0273457	-1.89298	1.56311
PELP1	8.9963	17	6.02256	6	0.224907	0.860366	0.261409	0.0132158	0.0273506	-1.93562	1.56303
TBC1D15	18.0689	25	1.15516	3	0.451723	0.165023	2.73734	0.0274259	0.027426	1.45277	1.56184
RBKS	7.20068	13	0.250246	1	0.180017	0.0357494	5.03552	0.00504945	0.0275786	2.33214	1.55943
CAMSAP1	2125.59	40	561.373	7	53.1398	80.1962	0.662622	0.495873	0.0275944	-0.593741	1.55918
MYEF2	6.77914	15	0.263939	1	0.169478	0.0377056	4.49479	0.0210254	0.0277801	2.16825	1.55627
RBBP6	19.8755	24	1.06552	2	0.496887	0.152218	3.26432	0.0487218	0.0278824	1.70678	1.55467
DDX55	40.9604	35	4.02151	6	1.02401	0.574502	1.78243	0.0216048	0.0279461	0.833846	1.55368
ERN1	9.33542	17	0.499164	2	0.233386	0.0713091	3.27287	0.0197991	0.0280985	1.71056	1.55132
ARMC2	15.7613	22	0.908384	3	0.394032	0.129769	3.03641	0.00351549	0.0283394	1.60237	1.54761
COMT	14.5313	16	0.534463	2	0.363282	0.0763519	4.758	0.000291768	0.0284698	2.25036	1.54562
TEX2	122.781	38	39.8295	7	3.06953	5.68993	0.539466	0.0611622	0.0285373	-0.890395	1.54459
RUNX2	51.6105	25	2.4493	3	1.29026	0.349901	3.68751	0.0127785	0.028735	1.88265	1.54159
PARP6	12.1688	21	0.806314	3	0.304221	0.115188	2.64109	0.0198833	0.029079	1.40113	1.53642
ACOT7	40.8487	26	2.63855	5	1.02122	0.376936	2.70926	0.00259303	0.0293167	1.4379	1.53288
AMOT	7.21954	13	0.234719	1	0.180488	0.0335313	5.38269	0.0022626	0.0294309	2.42833	1.5312
ZNF224	8.88301	18	4.18951	6	0.222075	0.598502	0.371052	0.0884555	0.0294952	-1.43031	1.53025
CEP76	13.9592	20	0.849064	3	0.34898	0.121295	2.87712	0.00637831	0.0295373	1.52463	1.52963
ROR2	20.9775	14	0.885782	2	0.524438	0.12654	4.14443	0.00119913	0.0295444	2.05118	1.52953
CHEK1	11.8777	20	4.41109	6	0.296943	0.630156	0.471221	0.573075	0.0297815	-1.08552	1.52605
SLC29A4	38.1635	26	2.46086	4	0.954088	0.351551	2.71394	0.00351951	0.0298487	1.44039	1.52507
SHMT1	22.6099	30	8.19693	6	0.565249	1.17099	0.48271	0.171375	0.0299271	-1.05077	1.52394
BRCC3	3.07852	10	1.50922	4	0.0769629	0.215603	0.356966	0.103419	0.0303335	-1.48614	1.51808
EVL	9.35955	15	0.341285	1	0.233989	0.0487549	4.79928	0.00737063	0.0304139	2.26282	1.51693
GABRB3	15.0466	14	0.267055	1	0.376164	0.0381507	9.85994	1.71657e-05	0.0304219	3.30158	1.51681
ATG10	8.62826	14	0.270524	1	0.215706	0.0386463	5.58155	0.0015075	0.0305264	2.48067	1.51532
TPM1	41.3929	11	0.53411	1	1.03482	0.0763015	13.5623	1.94096e-06	0.0306589	3.76153	1.51344
CCDC66	388.639	40	110.122	7	9.71598	15.7318	0.617603	0.541151	0.0308377	-0.695249	1.51092
TMEM164	20.801	29	1.85381	5	0.520024	0.26483	1.96361	0.0245292	0.0308737	0.973509	1.51041
ANKRD31	21.0272	19	1.02336	3	0.525679	0.146194	3.59577	0.000971728	0.0311255	1.8463	1.50688
VEGFC	145.489	33	8.75112	4	3.63723	1.25016	2.90941	0.0146059	0.03156	1.54073	1.50086
C12orf48	20.7537	29	2.08008	6	0.518844	0.297154	1.74604	0.00433081	0.031673	0.804091	1.49931
PTPN20	9.80206	17	0.384392	1	0.245052	0.0549131	4.46253	0.017216	0.0317999	2.15786	1.49757
LATS1	59.741	39	5.94006	7	1.49352	0.84858	1.76003	0.00183683	0.0324725	0.815598	1.48848
DNMT1	87.0298	39	34.9001	7	2.17574	4.98573	0.436394	0.0277669	0.0324863	-1.1963	1.4883
LRRC28	9.67787	17	0.35381	1	0.241947	0.0505443	4.78682	0.00659606	0.032821	2.25907	1.48385
ANKS1B	104.743	29	5.81764	5	2.61857	0.831091	3.15076	0.000602391	0.0328944	1.6557	1.48288
KDM4B	193.543	40	57.0964	7	4.83857	8.15663	0.593207	0.539289	0.0331299	-0.753393	1.47978
ZBTB46	380.038	37	23.8568	7	9.50095	3.40812	2.78774	0.000462625	0.0333597	1.4791	1.47678
DHRSX	54.7863	32	4.63429	7	1.36966	0.662042	2.06884	0.00168355	0.0333728	1.04882	1.47661
ARHGEF38	8.49624	11	0.270524	1	0.212406	0.0386463	5.49615	0.00151319	0.0335008	2.45842	1.47494
NPR3	12.0171	11	0.280616	1	0.300426	0.040088	7.49416	0.000112567	0.0335107	2.90577	1.47482
FRA10AC1	21.0996	22	0.504372	2	0.527489	0.0720531	7.32084	8.28285e-06	0.0335842	2.87201	1.47387
UBE2C	89.7375	32	29.8988	7	2.24344	4.27126	0.52524	0.316598	0.033608	-0.928952	1.47356
EPHX1	8.79013	14	0.229511	1	0.219753	0.0327873	6.70238	0.000267632	0.0337683	2.74467	1.47149
MTPAP	19.5052	27	1.48794	4	0.487631	0.212563	2.29406	0.0489374	0.0338508	1.1979	1.47043
SHROOM3	68.1031	34	23.7824	7	1.70258	3.39749	0.501128	0.91016	0.0339295	-0.996748	1.46942
AGTPBP1	612.971	40	169.647	7	15.3243	24.2353	0.632313	0.115269	0.0339396	-0.661288	1.46929
TTC12	10.2074	15	0.48066	2	0.255185	0.0686657	3.71634	0.00261545	0.0340021	1.89388	1.46849
KLHDC4	146.353	40	44.5825	7	3.65881	6.36893	0.574478	0.162852	0.0340087	-0.799676	1.46841
GIPC1	5.06431	8	3.36272	5	0.126608	0.480388	0.263553	0.274189	0.0340295	-1.92384	1.46814
RP11-793H13.8	10.418	17	0.52077	2	0.260451	0.0743957	3.50088	0.00504745	0.0341108	1.80772	1.46711
CLEC16A	403.804	40	47.4445	7	10.0951	6.77778	1.48944	0.0361845	0.0345664	0.574769	1.46135
UBP1	87.437	38	24.4597	7	2.18592	3.49425	0.625578	0.214917	0.0347565	-0.676738	1.45896
TMX4	12.1901	16	0.733883	3	0.304754	0.10484	2.90683	0.00343534	0.0349569	1.53945	1.45647
HAUS4	90.9939	37	27.9806	7	2.27485	3.99723	0.569106	0.188572	0.0351575	-0.81323	1.45398
PIK3CB	143.739	40	44.0436	7	3.59348	6.29194	0.571124	0.331102	0.0353468	-0.808123	1.45165
MAPKAP1	274.122	40	74.4179	7	6.85306	10.6311	0.644622	0.193009	0.0356746	-0.633474	1.44764
BUB1	78.1001	36	21.626	7	1.9525	3.08943	0.631994	0.863369	0.0357164	-0.662018	1.44713
CDON	14.2163	19	0.698373	2	0.355406	0.0997676	3.56234	0.00825474	0.0358932	1.83283	1.44499
SCARB2	4.01906	11	2.01427	4	0.100477	0.287753	0.349176	0.0959736	0.0361887	-1.51797	1.44143
YAF2	84.6397	36	8.27432	6	2.11599	1.18205	1.79011	0.00740463	0.0362942	0.84005	1.44016
NUDCD3	50.0845	34	16.6113	7	1.25211	2.37304	0.527641	0.938391	0.0362974	-0.922372	1.44012
RINT1	19.7633	26	1.22517	4	0.494082	0.175025	2.82293	0.00150895	0.0367674	1.49719	1.43454
GPLD1	16.6346	17	0.742518	3	0.415866	0.106074	3.92053	0.000143909	0.0367682	1.97105	1.43453
C10orf88	11.2083	19	0.63228	2	0.280209	0.0903257	3.1022	0.0268388	0.036816	1.63329	1.43396
TRIOBP	11.1075	20	4.43841	6	0.277687	0.634059	0.437952	0.129356	0.0368824	-1.19116	1.43318
P4HA2	4.80417	8	2.71843	4	0.120104	0.388347	0.309271	0.136421	0.036966	-1.69306	1.4322
TACC1	55.5033	32	4.29965	5	1.38758	0.614235	2.25904	0.0243257	0.03722	1.17571	1.42922
SCD	11.9252	16	0.620931	2	0.298129	0.0887044	3.36093	0.00791825	0.0373479	1.74886	1.42773
EPB41	74.7403	38	21.977	7	1.86851	3.13957	0.595147	0.30218	0.0377251	-0.748681	1.42337
WRB	7.46475	13	3.31916	5	0.186619	0.474166	0.393573	0.133242	0.0380192	-1.3453	1.42
FOXO1	8.47197	13	0.280616	1	0.211799	0.040088	5.28335	0.00180517	0.0380218	2.40145	1.41997
PLTP	23.7592	17	0.808958	1	0.593981	0.115565	5.13978	0.0023648	0.0380521	2.36171	1.41962
KDM5C	6.72047	15	0.250246	1	0.168012	0.0357494	4.69971	0.0060541	0.0384387	2.23257	1.41523
SMOC1	46.3281	17	0.70762	1	1.1582	0.101089	11.4573	4.52853e-06	0.038529	3.51819	1.41421
BBX	181.324	40	48.9802	7	4.5331	6.99717	0.647848	0.265652	0.0386205	-0.626272	1.41318
NMRAL1	128.829	40	38.4293	7	3.22072	5.4899	0.586662	0.372302	0.0390376	-0.769399	1.40852
TTI1	3.59759	8	1.99282	4	0.0899398	0.284689	0.315923	0.0964166	0.0390644	-1.66235	1.40822
MAN2B1	3.95642	10	2.02734	4	0.0989106	0.289619	0.341519	0.14119	0.0391606	-1.54996	1.40715
THSD4	171.227	35	12.2347	6	4.28068	1.74782	2.44915	0.000234443	0.0393177	1.29228	1.40541
XRCC6	16.0195	28	5.60521	7	0.400487	0.800745	0.500143	0.287438	0.0394398	-0.999588	1.40407
DCAF5	89.4971	38	24.9911	7	2.23743	3.57015	0.626703	0.907936	0.0394584	-0.674146	1.40386
TUBGCP4	95.6504	40	11.4069	7	2.39126	1.62956	1.46742	0.0418931	0.0396161	0.553287	1.40213
CASP8	7.19261	13	0.281873	1	0.179815	0.0402676	4.46551	0.0104719	0.0397969	2.15882	1.40015
ARHGAP21	45.6559	36	16.7314	7	1.1414	2.3902	0.477532	0.129714	0.0398523	-1.06633	1.39955
CENPI	91.4224	38	26.9048	7	2.28556	3.84354	0.59465	0.366352	0.0399101	-0.749887	1.39892
CDYL2	264.692	28	12.7632	6	6.61731	1.82331	3.62929	0.000164664	0.0400475	1.85969	1.39742
MAP2K4	382.816	39	113.069	7	9.5704	16.1527	0.592496	0.078174	0.0401209	-0.755122	1.39663
ACTR3	84.1326	36	27.254	7	2.10332	3.89343	0.540222	0.13589	0.0401519	-0.888375	1.39629
KIAA0825	10.6981	12	0.35381	1	0.267452	0.0505443	5.29144	0.00162051	0.0402404	2.40366	1.39534
SNX2	30.7156	29	9.67316	7	0.767891	1.38188	0.555686	0.0959842	0.0407072	-0.847659	1.39033
PSMD5	34.3833	32	10.5687	7	0.859583	1.50981	0.569332	0.180849	0.0408694	-0.812658	1.3886
LAMB2	5.7252	13	2.5993	5	0.14313	0.371329	0.385453	0.326913	0.040954	-1.37537	1.3877
FAM83B	2.33505	5	1.50842	4	0.0583764	0.215488	0.270903	0.0547357	0.0411834	-1.88415	1.38528
ZKSCAN4	0.331496	1	1.71972	4	0.0082874	0.245675	0.0337333	1.12682e-10	0.0416031	-4.88968	1.38087
NRIP1	615.767	38	185.606	7	15.3942	26.5151	0.580581	0.0950233	0.0417546	-0.784429	1.3793
SRSF11	24.102	32	7.58561	6	0.60255	1.08366	0.556033	0.110704	0.0417946	-0.846757	1.37888
DHX37	27.8246	31	9.58321	6	0.695616	1.36903	0.508109	0.347772	0.0418283	-0.97679	1.37853
CECR7	72.955	26	27.7502	6	1.82388	3.96432	0.460073	0.0810234	0.041839	-1.12007	1.37842
SMARCA5	1030.16	40	229.845	7	25.7539	32.835	0.784344	0.0499523	0.0418415	-0.350441	1.37839
NOL12	40.5784	32	13.011	7	1.01446	1.85872	0.545785	0.721376	0.0422005	-0.873594	1.37468
MAST3	8.84211	18	3.56006	5	0.221053	0.50858	0.434647	0.0608104	0.0423047	-1.20208	1.37361
DNAJA1	42.1944	34	12.6441	7	1.05486	1.8063	0.583989	0.110514	0.0424859	-0.775988	1.37175
CBFB	135.171	39	40.2684	7	3.37928	5.75263	0.587433	0.776578	0.0426072	-0.767504	1.37052
DNAJC10	17.6872	27	1.44033	4	0.442179	0.205762	2.14899	0.0453442	0.04261	1.10366	1.37049
SUN1	80.7063	37	25.6261	7	2.01766	3.66087	0.551142	0.803114	0.0427316	-0.859504	1.36925
UTRN	413.501	40	125.894	7	10.3375	17.9848	0.574792	0.384373	0.0428482	-0.798888	1.36807
D2HGDH	3.72339	8	2.23741	4	0.0930846	0.31963	0.291226	0.111713	0.0430103	-1.77979	1.36643
PRKAR1A	14.3139	23	1.15453	4	0.357848	0.164933	2.16965	0.0238334	0.0430629	1.11746	1.3659
SUGT1P3	8.72329	12	0.229511	1	0.218082	0.0327873	6.65142	0.000200633	0.043208	2.73366	1.36444
CCDC146	23.8097	26	1.91258	4	0.595243	0.273226	2.17858	0.036639	0.0433829	1.12339	1.36268
AP2A2	44.9729	33	4.69327	6	1.12432	0.670467	1.67693	0.00832899	0.0435408	0.745819	1.3611
NIPAL3	5.71401	13	2.55329	4	0.14285	0.364756	0.391632	0.162288	0.0440816	-1.35243	1.35574
CARD14	12.7534	12	0.55562	2	0.318836	0.0793742	4.01687	0.000733833	0.0442185	2.00607	1.3544
TULP3	24.6589	25	1.77638	4	0.616473	0.253768	2.42928	0.0420676	0.0444876	1.28053	1.35176
XPO7	42.2853	34	3.05272	4	1.05713	0.436103	2.42404	0.522976	0.0446556	1.27742	1.35012
ADAM19	13.4585	16	0.818196	3	0.336462	0.116885	2.87857	0.00244292	0.0446798	1.52535	1.34989
FKBP10	10.9274	16	0.624153	2	0.273185	0.0891647	3.06383	0.0207022	0.0447497	1.61533	1.34921
MFAP1	5.75785	15	0.250246	1	0.143946	0.0357494	4.02653	0.0345184	0.0449718	2.00954	1.34706
MAN2A1	298.581	40	86.5878	7	7.46452	12.3697	0.603453	0.233788	0.0452032	-0.728686	1.34483
WNK2	6.54091	14	0.273746	1	0.163523	0.0391066	4.18146	0.0187325	0.0454517	2.06401	1.34245
ZNF823	13.4818	22	9.2584	6	0.337046	1.32263	0.25483	0.0136346	0.0455549	-1.97239	1.34146
TIMELESS	39.2715	29	13.2093	7	0.981787	1.88704	0.520279	0.879918	0.0458171	-0.942642	1.33897
TMF1	25.4919	33	11.6676	7	0.637297	1.6668	0.382348	0.00369108	0.0458385	-1.38704	1.33877
LRRK1	11.4493	16	5.39921	5	0.286232	0.771315	0.371096	0.0653833	0.045873	-1.43014	1.33844
AKT1	7.58459	12	0.280616	1	0.189615	0.040088	4.72996	0.00399719	0.0459979	2.24183	1.33726
UGGT2	582.573	40	64.8453	7	14.5643	9.26362	1.57221	7.48218e-05	0.0460382	0.652792	1.33688
ZNF282	3.49131	9	1.81566	4	0.0872827	0.259381	0.336504	0.126579	0.0460511	-1.5713	1.33676
ELP2	38.7228	33	3.85538	6	0.968069	0.550768	1.75767	0.00737233	0.0460846	0.813665	1.33644
PHF7	28.5296	26	1.91376	3	0.713241	0.273395	2.60883	0.0499184	0.0462249	1.3834	1.33512
ANXA8	5.96858	11	0.234719	1	0.149215	0.0335313	4.45001	0.00789661	0.0463762	2.15381	1.3337
RBBP4	8.12581	18	3.10827	6	0.203145	0.444039	0.457494	0.301957	0.0465827	-1.12818	1.33178
SH3RF3	10.6161	10	0.263939	1	0.265403	0.0377056	7.03882	0.000114265	0.0468376	2.81533	1.32941
MTHFD2L	882.996	40	100.667	7	22.0749	14.381	1.535	0.00928318	0.0468961	0.618241	1.32886
ITGA6	12.8714	17	5.12059	5	0.321785	0.731512	0.439889	0.440274	0.0470606	-1.18479	1.32734
GMEB1	44.4044	39	13.9858	6	1.11011	1.99797	0.55562	0.126021	0.0472454	-0.847829	1.32564
ADGRE5	27.5237	27	9.11066	6	0.688093	1.30152	0.528683	0.401931	0.0473138	-0.919525	1.32501
CA5BP	2.76963	5	1.78267	3	0.0692408	0.254667	0.271888	0.0611274	0.0475566	-1.87892	1.32279
VCL	68.117	38	19.3177	7	1.70293	2.75967	0.617076	0.511208	0.0475916	-0.69648	1.32247
[truncated: 7,845 more rows]

## Sheet: KRAS mutant vs. wild-type
Gene Name	Sum circRNA KRAS wt	# cell lines KRAS wt circRNA	Sum circRNA KRAS mut	# cell lines KRAS mut circRNA	AVE circRNA KRAS wt	AVE circRNA KRAS mut	fold change KRAS mut vs KRAS wt	F-test	T-test	log2 fold change	-log10 p-value		significance threshold (-log10 p)
[truncated: 9,390 more rows]

[truncated: 2 more sheets: BRAF mutant vs. wild-type, TP53 mutant vs. wild-type]
