# Supplementary material for: The Circular RNA Landscape of Non-Small Cell Lung Cancer Cells
Source: Cancers (Basel). 2020 Apr 28;12(5):1091. doi: 10.3390/cancers12051091 (PMC7281449; doi:10.3390/cancers12051091)
Supplement: Supplementary file 1 [file cancers-12-01091-s001.zip › Suppl Table S5 Primers.xlsx]

## Sheet: qPCR
Target	ENST	Exon	Forward primer	Exon	Reverse primer
Cyclophilin A	ENST00000468812.6		GTCAACCCCACCGTGTTCTT		CTGCTGTCTTTGGGACCTTGT
Linear MET	ENST00000397752.7	2	GGAGCCAGCCTGAATGATGA	2	AGTGCTCATGATTGGGTCCG
Circular MET	ENST00000397752.7	2	ACGGACCCAATCATGAGCAC	2	CACTCCCCATTGCTCCTCTG
Linear TNFRSF21	ENST00000296861.2	2	TTGGGAGGGTCTTGTTCACG	3	CCATCTTTCCACGCCCTGAG
Circular TNFRSF21	ENST00000296861.2	3	TCTGTTCTGGCTGAGCTGTG	2	CAGGATCCCAGTGCCATTGT
Linear CCNB1	ENST00000256442.9	6	TAAACTTTGGTCTGGGTCGGC	7	AGGAGGAAAGTGCACCATGT
Circular CCNB1	ENST00000256442.9	7	ACATGGTGCACTTTCCTCCT	6	CTGCAGCATCTTCTTGGGCA
Linear PVT1	ENST00000504719.6	2	ATGCACTGGAATGACACACG	2	CCAGGAAGAGTCGGGGTCTT
Circular PVT1	ENST00000504719.6	2	AAGACCCCGACTCTTCCTGG	2	TTCCACCAGCGTTATTCCCC
Linear ERBB2	ENST00000578373.5	7	CACCCAGCTCTTTGAGGACA	11	GTTCCGCTGGATCAAGACCC
Circular ERBB2	ENST00000578373.5	11	TTGAGTCCATGCCCAATCCC	7	TTCAGCGGGTCTCCATTGTC
Linear HIPK3	ENST00000303296.8	2	CGTGGCGAAACAGATTGCAT	2	GCTGTCACAACTGTCACTGG
Circular HIPK3	ENST00000303296.8	2	TCGGCCCATTCTTCAACAAGT	2	GACCAAGACTTGTGAGGCCA
Circular SMAD2 6-2	ENST00000262160.10	6	TGGAGAAACAAGTGACCAACAG	2	GAATGGCAAGATGGACGACA
Linear SMAD2 6-2	ENST00000262160.10	2	GCCATCACCACTCAAAACTGT	6	GGCCTGTTGTATCCCACTGA
Circular SMAD2 6-3	ENST00000262160.10	6	TGGAGAAACAAGTGACCAACAG	3	GGCCTGTTGTATCCCACTGA
Linear SMAD2 6-3	ENST00000262160.10	3	GACACCAGTTTTGCCTCCAG	6	CTCTGTGGCTCAATTCCTGC
Circular KIF5B 18-20	ENST00000302418.4	20	AGAGCAGGAACGTCTAAGAGT	18	ACTTCATTTGCAGTCTGAACCTT
Linear KIF5B 18-20	ENST00000302418.4	18	AACAGCAGATCCAGAGCCAT	20	ACTCTTAGACGTTCCTGCTCT
Circular KIF5B 20-24	ENST00000302418.4	24	CGCATAAAGGAAGCAGTCAGG	20	ACTCTTAGACGTTCCTGCTCT
Linear KIF5B 20-24	ENST00000302418.4	20	AGAGCAGGAACGTCTAAGAGT	24	GCCACTGTCTCTTCCAAACC
Circular DEK 3-9	ENST00000652689.1	9	GTGCTAACTTGGAAGAAGTCACA	3	GCCCCTTTCCTTGTGCAATT
Linear DEK 3-9	ENST00000652689.1	3	AATTGCACAAGGAAAGGGGC	9	CCTGGCCTGTTGTAAAGCAG
Circular DEK 8-9	ENST00000652689.1	9	GTGCTAACTTGGAAGAAGTCACA	8	CTTGGTGGTGCTGCTATCTG
Linear DEK 8-9	ENST00000652689.1	8	CAGATAGCAGCACCACCAAG	9	TGTGACTTCTTCCAAGTTAGCAC

## Sheet: PCR
Target	ENST	exon	Forward primer	exon	Reverse primer
Linear MET	ENST00000397752.7	2	TCAGCTTCCCAACTTCACCG	2	TCATCATTCAGGCTGGCTCC
Circular MET	ENST00000397752.7	2	GGAGCCAGCCTGAATGATGA	2	CGGTGAAGTTGGGAAGCTGA
Linear TNFRSF21	ENST00000296861.2	2	ACAATGGCACTGGGATCCTG	3	CAGAGACTGAGGATGTGCGG
Circular TNFRSF21	ENST00000296861.2	3	CCGCACATCCTCAGTCTCTG	2	CAGGATCCCAGTGCCATTGT
Linear CCNB1	ENST00000256442.9	6	CAGCTGGTTGGTGTCACTG	7	GGCCAAAGTATGTTGCTCGA
Circular CCNB1	ENST00000256442.9	7	TCGAGCAACATACTTTGGCC	6	CAGTGACACCAACCAGCTG
Linear PVT1	ENST00000504719.6	2	GGGGAATAACGCTGGTGGAA	2	CCAGGAAGAGTCGGGGTCTT
Circular PVT1	ENST00000504719.6	2	AAGACCCCGACTCTTCCTGG	2	TTCCACCAGCGTTATTCCCC
Linear ERBB2	ENST00000578373.5	7	GACAATGGAGACCCGCTGAA	11	GGGATTGGGCATGGACTCAA
Circular ERBB2	ENST00000578373.5	11	TTGAGTCCATGCCCAATCCC	7	TTCAGCGGGTCTCCATTGTC
Linear HIPK3	ENST00000303296.8	2	TGGCCTCACAAGTCTTGGTC	2	ACTTGTTGAAGAATGGGCCGA
Circular HIPK3	ENST00000303296.8	2	TCGGCCCATTCTTCAACAAGT	2	GACCAAGACTTGTGAGGCCA
Circular SMAD2 6-2	ENST00000262160.10	6	TGGAGAAACAAGTGACCAACAG	2	TCCCAGCAGTCTCTTCACAA
Linear SMAD2 6-2	ENST00000262160.10	2	TTGTGAAGAGACTGCTGGGA	6	CTGTTGGTCACTTGTTTCTCCA
Circular SMAD2 6-3	ENST00000262160.10	6	TGGAGAAACAAGTGACCAACAG	3	TTTGGTGTACTCAGTCCCCA
Linear SMAD2 6-3	ENST00000262160.10	3	TGGGGACTGAGTACACCAAA	6	CTGTTGGTCACTTGTTTCTCCA
Circular KIF5B 18-20	ENST00000302418.4	20	GCCACAGATCAGGAAAAGAGC	18	AGTGCTCCTTTTCCATTTCAT
Linear KIF5B 18-20	ENST00000302418.4	18	ATGAAATGGAAAAGGAGCACT	20	GCTCTTTTCCTGATCTGTGGC
Circular KIF5B 20-24	ENST00000302418.4	24	ACAGCTGAGAGAGTGAAAGC	20	GCTCTTTTCCTGATCTGTGGC
Linear KIF5B 20-24	ENST00000302418.4	20	GCCACAGATCAGGAAAAGAGC	24	GCTTTCACTCTCTCAGCTGT
Circular DEK 3-9	ENST00000652689.1	9	AGTGAGTCTGAGGATAGTTCA	3	TTGCCTTCCACGATGAGACT
Linear DEK 3-9	ENST00000652689.1	3	AGTCTCATCGTGGAAGGCAA	9	TGAACTATCCTCAGACTCACT
Circular DEK 8-9	ENST00000652689.1	9	GTGCTAACTTGGAAGAAGTCACA	8	TCTTCTTGGTGGTGCTGCTA
Linear DEK 8-9	ENST00000652689.1	8	TAGCAGCACCACCAAGAAGA	9	TGTGACTTCTTCCAAGTTAGCAC

## Sheet: Cloning
Target	Forward primer	Reverse primer
Lacc2 intronic sequence	GGGGACAAGTTTGTACAAAAAAGCAGGCTTCATGGCGTTAGAGTAGGCGAGGAC	GGGGACCACTTTGTACAAGAAAGCTGGGTCCTACAGACGGACATGGCGAGATC
MET	GCATTAATTAAATAAACCTCTCATAATGAAGGCCCCCGCTG	TTCGGCGCGCCCCTATTAAAGCAGTGCTCATG
TNFRSF21	GCATTAATTAACTTGGATTCCTTAGCACCACC	GCAGGCGCGCCCATGGCCATTGCAGTAGTAG
HIPK3	ATGTTAATTAAGTATGGCCTCACAAGTCTTGGTCTA	ATTGGCGCGCCCTGTAGTACCGAGATTGTAGATATGT
CCNB1	GCATTAATTAAAATAATTGTGTGCCCAAGAAGATGC	GCAGGCGCGCCCCATTCACCATTATCCAGAATT
ERBB2	GCATTAATTAAGATATCCAGGAGGTGCAGG	GCAGGCGCGCCAGGGACAGGCAGTCACAC
PVT1	GCATTAATTAAGCCTGATCTTTTGGCCAGAAG	GCCGGCGCGCCCTCAAGCCCAGCTGAGCG
SMAD2 6-2	CTATTAATTAAGTTCGATACAAGAGGCTGTTTTC	CTCGGCGCGCCCTGTGTCCATACTTTGATTCAACTG
SMAD2 6-3	TGATTAATTAACACTTGCTCTGAAATTTGGGG	CTCGGCGCGCCCTGTGTCCATACTTTGATTCAACTG
KIF5B 18-20	GTGTTAATTAAAGAAAGTCCATGAAATGGAAAAG	AGGGGCGCGCCGTAAGTTCATGTAGTTTTCTGCTCTTT
KIF5B 20-24	CCTTTAATTAACCAAAACCAGAAAATGATGTTAGA	TGTGGCGCGCCCAATCTGTGCAGAATGCCCT
DEK 3-9	AAACTGCAGAAAAGAGTCTCATCGTGGAAGG	CTTGGCGCGCCCTTTTTGCAAATCTGTTTCATTG
DEK 8-9	AGCCTGCAGAAAGTGAGTCTGAGGATAGTTCAGATG	CTTGGCGCGCCCTTTTTGCAAATCTGTTTCATTG

## Sheet: Mutagenesis
Target	Forward primer	Reverse primer
TNFRSF21 MCS1del partA	TACCGGGCGCCGTCCA	GGAATCCAAGCTGCATAAAATAAAAAAAATATATATAAC
TNFRSF21 MCS1del partB	CAGCGGGTTTAAACTCATCG	AATGGCCATGGTAAGTATTCAAAATTCC
TNFRSF21 MCS2del partA	TTTTATGCAGCTTGGATTCCTTAGCACCACC	GAGAAGGTACCCCGAGCACAC
TNFRSF21 MCS2del partB	GAATACTTACCATGGCCATTGCAGTAGTAG	GCTCGGGGTACCTTCTCAG
MET MCS1del partA	TACCGGGCGCCGTCCA	AGAGGTTTATCTGCATAAAATAAAAAAAATATATATAAC
MET MCS1del partB	TTTTATGCAGATAAACCTCTCATAATGAAGG	CTCACTGATATCGAATGC
MET MCS2del partA	CAGCGGGTTTAAACTCATCG	CTTTAATAGGGTAAGTATTCAAAATTCC
MET MCS2del partB	GAATACTTACCCTATTAAAGCAGTGCTC	GCATTCGATATCAGTGAG
PVT1 MCS1del partA	TACCGGGCGCCGTCCA	AAGATCAGGCCTGCATAAAATAAAAAAAATATATATAAC
PVT1 MCS1del partB	TTTTATGCAGGCCTGATCTTTTGGCCAG	GTAACCGGCGCGCCCTCAAGC
PVT1 MCS2del partA	CAGCGGGTTTAAACTCATCG	TGGGCTTGAGGTAAGTATTCAAAATTCC
PVT1 MCS2del partB	GAATACTTACCTCAAGCCCAGCTGAGCG	TACCGGGCGCCGTCCA
HIPK3 MCS1del partA	TACCGGGCGCCGTCCA	GAGGCCATACCTGCATAAAATAAAAAAAATATATATAAC
HIPK3 MCS1del partB	TTTTATGCAGGTATGGCCTCACAAGTCTTG	CGAACAGGATCCACCAACAT
HIPK3 MCS2del partA	CAGCGGGTTTAAACTCATCG	GGTACTACAGGTAAGTATTCAAAATTCC
HIPK3 MCS2del partB	GAATACTTACCTGTAGTACCGAGATTGTAG	ATGTTGGTGGATCCTGTTCG
CCNB1 MCS1del partA	TACCGGGCGCCGTCCA	CACAATTATTCTGCATAAAATAAAAAAAATATATATAAC
CCNB1 MCS1del partB	TTTTATGCAGAATAATTGTGTGCCCAAGAAG	GTAACCGGCGCGCCCCATTC
CCNB1 MCS2del partA	CAGCGGGTTTAAACTCATCG	TGGTGAATGGGTAAGTATTCAAAATTCC
CCNB1 MCS2del partB	GAATACTTACCCATTCACCATTATCCAGAATTTTC	TACCGGGCGCCGTCCA
ERBB2 MCS1del partA	TACCGGGCGCCGTCCA	CCTGGATATCCTGCATAAAATAAAAAAAATATATATAAC
ERBB2 MCS1del partB	TTTTATGCAGGATATCCAGGAGGTGCAG	TGAGGCTTCGAAGCTGCAG
ERBB2 MCS2del partA	CAGCGGGTTTAAACTCATCG	GCCTGTCCCTGTAAGTATTCAAAATTCC
ERBB2 MCS2del partB	GAATACTTACAGGGACAGGCAGTCACAC	CTGCAGCTTCGAAGCCTCA
DEK 3-9 MCS1del partA	GATTAGTTCTCGAGCTTTTG	AGACTCTTTTCTGCATAAAATaAAAAAAATATATATAACAA
DEK 3-9 MCS1del partB	TTTTATGCAGAAAAGAGTCTCATCGTGG	CAGCGGGTTTAAACTCATCG
DEK 3-9 MCS2del partA	GATTAGTTCTCGAGCTTTTG	GAATACTTACCTTTTTGCAAATCTGTTTCAT
DEK 3-9 MCS2del partB	TTGCAAAAAGGTAAGTATTCAAAATTCCAAAATTTT	CAGCGGGTTTAAACTCATCG
DEK 8-9 MCS1del partA	GATTAGTTCTCGAGCTTTTG	TTTTTGGTGGCTGCATAAAATaAAAAAAATATATATAACAA
DEK 8-9 MCS1del partB	TTTTATGCAGCCACCAAAAAAGACAGC	CAGCGGGTTTAAACTCATCG
DEK 8-9 MCS2del partA	GATTAGTTCTCGAGCTTTTG	GAATACTTACCTTTTTGCAAATCTGTTTCAT
DEK 8-9 MCS2del partB	TTGCAAAAAGGTAAGTATTCAAAATTCCAAAATTTT	CAGCGGGTTTAAACTCATCG
KIF5B 18-20 MCS1del partA	GATTAGTTCTCGAGCTTTTG	TGGACTTTCTCTGCATAAAATaAAAAAAATATATATAACAA
KIF5B 18-20 MCS1del partB	TTTTATGCAGAGAAAGTCCATGAAATGGA	CAGCGGGTTTAAACTCATCG
KIF5B 18-20 MCS2del partA	GATTAGTTCTCGAGCTTTTG	GAATACTTACGTAAGTTCATGTAGTTTTCTGC
KIF5B 18-20 MCS2del partB	ATGAACTTACGTAAGTATTCAAAATTCCAAAATTTT	CAGCGGGTTTAAACTCATCG
KIF5B 20-24 MCS1del partA	GATTAGTTCTCGAGCTTTTG	CTGGTTTTGGCTGCATAAAATaAAAAAAATATATATAACAA
KIF5B 20-24 MCS1del partB	TTTTATGCAGCCAAAACCAGAAAATGATG	CAGCGGGTTTAAACTCATCG
KIF5B 20-24 MCS2del partA	GATTAGTTCTCGAGCTTTTG	GAATACTTACCAATCTGTGCAGAATGC
KIF5B 20-24 MCS2del partB	GCACAGATTGGTAAGTATTCAAAATTCCAAAATTTT	CAGCGGGTTTAAACTCATCG
SMAD2 2-6 MCS1del partA	GATTAGTTCTCGAGCTTTTG	TGTATCGAACCTGCATAAAATaAAAAAAATATATATAACAA
SMAD2 2-6 MCS1del partB	TTTTATGCAGGTTCGATACAAGAGGCT	CAGCGGGTTTAAACTCATCG
SMAD2 2-6 MCS2del partA	GATTAGTTCTCGAGCTTTTG	GAATACTTACCTGTGTCCATACTTTGATTC
SMAD2 2-6 MCS2del partB	ATGGACACAGGTAAGTATTCAAAATTCCAAAATTTT	CAGCGGGTTTAAACTCATCG
SMAD2 3-6 MCS1del partA	GATTAGTTCTCGAGCTTTTG	AGAGCAAGTGCTGCATAAAATaAAAAAAATATATATAACAA
SMAD2 3-6 MCS1del partB	TTTTATGCAGCACTTGCTCTGAAATTTGG	CAGCGGGTTTAAACTCATCG
SMAD2 3-6 MCS2del partA	GATTAGTTCTCGAGCTTTTG	GAATACTTACCTGTGTCCATACTTTGATTC
SMAD2 3-6 MCS2del partB	ATGGACACAGGTAAGTATTCAAAATTCCAAAATTTT	CAGCGGGTTTAAACTCATCG
