# Supplementary material for: The Circular RNA Landscape of Non-Small Cell Lung Cancer Cells
Source: Cancers (Basel). 2020 Apr 28;12(5):1091. doi: 10.3390/cancers12051091 (PMC7281449; doi:10.3390/cancers12051091)
Supplement: Supplementary file 1 [file cancers-12-01091-s001.zip › Suppl Western Blots Densitometry.xlsx]

## Sheet: Shapes Table Export
Figure 11c	Image Name	Channel	Antibody	Name	Signal	Total	Area	Bkgnd.	Type
	20200113_TNFRSF21 OE_replicate1.tif	W	TNFRSF21	ctrl 120kDa	1213946	11018186	2295	4272	Signal
	20200113_TNFRSF21 OE_replicate1.tif	W	TNFRSF21	TNFRSF21 OE 120kDa	1897864	12786668	2494	4366	Signal
	20200113_TNFRSF21 OE_replicate1.tif	W	TNFRSF21	ctrl 80 kDa	216948	7948980	1848	4184	Signal
	20200113_TNFRSF21 OE_replicate1.tif	W	TNFRSF21	TNFRSF21 OE 80 kDa	297306	9473226	2210	4152	Signal
	20200113_TNFRSF21 OE_replicate1.tif	W	TNFRSF21	ctrl 42kDa	43354	7137154	1800	3941	Signal
	20200113_TNFRSF21 OE_replicate1.tif	W	TNFRSF21	TNFRSF21 OE 42kDa	1461498	12138950	2407	4436	Signal
	20200113_TNFRSF21 OE_replicate1.tif	W	ß-Actin	ctrl	131231	5370311	2772	1890	Signal
	20200113_TNFRSF21 OE_replicate1.tif	W	ß-Actin	TNFRSF21 OE	243717	5862957	2970	1892	Signal
	20200128_TNFRSF21 OE_replicate2_tif	W	TNFRSF21	ctrl 120kDa	507804	10806652	2576	3998	Signal
	20200128_TNFRSF21 OE_replicate2_tif	W	TNFRSF21	TNFRSF21 OE 120kDa	745606	12373606	2850	4080	Signal
	20200128_TNFRSF21 OE_replicate2_tif	W	TNFRSF21	ctrl 80kDa	107678	8937470	2208	3999	Signal
	20200128_TNFRSF21 OE_replicate2_tif	W	TNFRSF21	TNFRSF21 OE 80kDa	222506	9310634	2208	4116	Signal
	20200128_TNFRSF21 OE_replicate2_tif	W	TNFRSF21	ctrl 42kDa	121410	5624310	1411	3900	Signal
	20200128_TNFRSF21 OE_replicate2_tif	W	TNFRSF21	TNFRSF21 OE 42kDa	1520516	12886976	2790	4074	Signal
	20200128_TNFRSF21 OE_replicate2_tif	W	ß-Actin	ctrl	368924	4455092	2136	1913	Signal
	20200128_TNFRSF21 OE_replicate2_tif	W	ß-Actin	TNFRSF21 OE	416359	4422361	2093	1914	Signal
	20200205_TNFRSF21 OE_replicate3.tif	W	TNFRSF21	ctrl 120kDa	344608	8009248	1920	3992	Signal
	20200205_TNFRSF21 OE_replicate3.tif	W	TNFRSF21	TNFRSF21 OE 120kDa	346026	8174730	1968	3978	Signal
	20200205_TNFRSF21 OE_replicate3.tif	W	TNFRSF21	ctrl 80 kDa	39444	5604292	1394	3992	Signal
	20200205_TNFRSF21 OE_replicate3.tif	W	TNFRSF21	TNFRSF21 OE 80kDa	27004	5899918	1494	3931	Signal
	20200205_TNFRSF21 OE_replicate3.tif	W	TNFRSF21	ctrl 42kDa	71938	6711298	1680	3952	Signal
	20200205_TNFRSF21 OE_replicate3.tif	W	TNFRSF21	TNFRSF21 OE 42kDa	1045760	11652224	2511	4224	Signal
	20200205_TNFRSF21 OE_replicate3.tif	W	ß-Actin	ctrl	335571	3808698	1827	1901	Signal
	20200205_TNFRSF21 OE_replicate3.tif	W	ß-Actin	TNFRSF21 OE	399748	4001828	1880	1916	Signal
Figure 11d	Image Name	Channel	Antibody	Name	Signal	Total	Area	Bkgnd.	Type
	20190704_TNFRSF21 endogenous_replicate1.tif	W	TNFRSF21	NCI-H1792 120kDa	197180	5045948	1242	3904	Signal
	20190704_TNFRSF21 endogenous_replicate1.tif	W	TNFRSF21	NCI-H1792_80kDa	87410	4635200	1170	3887	Signal
	20190704_TNFRSF21 endogenous_replicate1.tif	W	TNFRSF21	NCI-H1792_42kDa	76168	5263624	1368	3792	Signal
	20190704_TNFRSF21 endogenous_replicate1.tif	W	TNFRSF21	NCI-H2085 120kDa	123808	4086220	1026	3862	Signal
	20190704_TNFRSF21 endogenous_replicate1.tif	W	TNFRSF21	NCI-H2085_80kDa	163974	4491654	1120	3864	Signal
	20190704_TNFRSF21 endogenous_replicate1.tif	W	TNFRSF21	NCI-H2085_42kDa	95366	4404566	1140	3780	Signal
	20190704_TNFRSF21 endogenous_replicate1.tif	W	TNFRSF21	NCI-H1573 120kDa	105990	3769350	954	3840	Signal
	20190704_TNFRSF21 endogenous_replicate1.tif	W	TNFRSF21	NCI-H1573_80kDa	35148	4587948	1200	3794	Signal
	20190704_TNFRSF21 endogenous_replicate1.tif	W	TNFRSF21	NCI-H1573_42kDa	442968	4487118	1045	3870	Signal
	20190704_TNFRSF21 endogenous_replicate1.tif	W	TNFRSF21	NCI-H1648 120kDa	23402	3794564	954	3953	Signal
	20190704_TNFRSF21 endogenous_replicate1.tif	W	TNFRSF21	NCI-H1648_80kDa	658890	5610954	1248	3968	Signal
	20190704_TNFRSF21 endogenous_replicate1.tif	W	TNFRSF21	NCI-H1648_42kDa	110500	3885748	972	3884	Signal
	20190704_TNFRSF21 endogenous_replicate1.tif	W	TNFRSF21	NCI-H1993 120kDa	837076	6295804	1334	4092	Signal
	20190704_TNFRSF21 endogenous_replicate1.tif	W	TNFRSF21	NCI-H1993_80kDa	1420768	7031848	1311	4280	Signal
	20190704_TNFRSF21 endogenous_replicate1.tif	W	TNFRSF21	NCI-H1993_42kDa	183406	4133506	1026	3850	Signal
	20190704_TNFRSF21 endogenous_replicate1.tif	W	TNFRSF21	Calu3 120kDa	2895052	11402840	2059	4132	Signal
	20190704_TNFRSF21 endogenous_replicate1.tif	W	TNFRSF21	Calu3_80kDa	1269524	8120676	1474	4648	Signal
	20190704_TNFRSF21 endogenous_replicate1.tif	W	TNFRSF21	Calu3_42kDa	153444	4918284	1180	4038	Signal
	20190704_TNFRSF21 endogenous_replicate1.tif	W	ß-Actin	NCI-H1792	7526578	11304766	1387	2724	Signal
	20190704_TNFRSF21 endogenous_replicate1.tif	W	ß-Actin	NCI-H2085	5483460	9508740	1680	2396	Signal
	20190704_TNFRSF21 endogenous_replicate1.tif	W	ß-Actin	NCI-H1573	4051224	6597076	986	2582	Signal
	20190704_TNFRSF21 endogenous_replicate1.tif	W	ß-Actin	NCI-H1648	5345608	8267386	1098	2661	Signal
	20190704_TNFRSF21 endogenous_replicate1.tif	W	ß-Actin	NCI-H1993	5254148	8347576	1178	2626	Signal
	20190704_TNFRSF21 endogenous_replicate1.tif	W	ß-Actin	Calu3	3673599	8140749	2025	2206	Signal
	20190723_TNFRSF21 endogenous_replicate2.tif	W	TNFRSF21	NCI-H1792_120kDa	187032	4002078	954	3999	Signal
	20190723_TNFRSF21 endogenous_replicate2.tif	W	TNFRSF21	NCI-H1792_80kDa	210558	3659538	810	4258	Signal
	20190723_TNFRSF21 endogenous_replicate2.tif	W	TNFRSF21	NCI-H1792_42kDa	98946	2912458	676	4162	Signal
	20190723_TNFRSF21 endogenous_replicate2.tif	W	TNFRSF21	NCI-H2085_120kDa	494414	4862666	969	4508	Signal
	20190723_TNFRSF21 endogenous_replicate2.tif	W	TNFRSF21	NCI-H2085_80kDa	709952	4977952	880	4850	Signal
	20190723_TNFRSF21 endogenous_replicate2.tif	W	TNFRSF21	NCI-H2085_42kDa	208532	3516788	756	4376	Signal
	20190723_TNFRSF21 endogenous_replicate2.tif	W	TNFRSF21	NCI-H1573_120kDa	145458	3657590	884	3973	Signal
	20190723_TNFRSF21 endogenous_replicate2.tif	W	TNFRSF21	NCI-H1573_80kDa	76506	3538890	848	4083	Signal
	20190723_TNFRSF21 endogenous_replicate2.tif	W	TNFRSF21	NCI-H1573_42kDa	565934	4329734	850	4428	Signal
	20190723_TNFRSF21 endogenous_replicate2.tif	W	TNFRSF21	NCI-H1648_120kDa	15336	3630636	900	4017	Signal
	20190723_TNFRSF21 endogenous_replicate2.tif	W	TNFRSF21	NCI-H1648_80kDa	116851	3211276	765	4045	Signal
	20190723_TNFRSF21 endogenous_replicate2.tif	W	TNFRSF21	NCI-H1648_42kDa	190836	3477756	735	4472	Signal
	20190723_TNFRSF21 endogenous_replicate2.tif	W	TNFRSF21	NCI-H1993_120kDa	4693518	13571288	1595	5566	Signal
	20190723_TNFRSF21 endogenous_replicate2.tif	W	TNFRSF21	NCI-H1993_80kDa	1033124	7984900	884	7864	Signal
	20190723_TNFRSF21 endogenous_replicate2.tif	W	TNFRSF21	NCI-H1993_42kDa	1318576	7244496	1040	5698	Signal
	20190723_TNFRSF21 endogenous_replicate2.tif	W	TNFRSF21	Calu3_120kDa	2198740	8777224	1342	4902	Signal
	20190723_TNFRSF21 endogenous_replicate2.tif	W	TNFRSF21	Calu3_80kDa	806932	6018928	986	5286	Signal
	20190723_TNFRSF21 endogenous_replicate2.tif	W	TNFRSF21	Calu3_42kDa	420382	5310526	1064	4596	Signal
	20190723_TNFRSF21 endogenous_replicate2.tif	W	ß-Actin	NCI-H1792	1492434	4516497	1449	2087	Signal
	20190723_TNFRSF21 endogenous_replicate2.tif	W	ß-Actin	NCI-H2085	1431932	4824812	1608	2110	Signal
	20190723_TNFRSF21 endogenous_replicate2.tif	W	ß-Actin	NCI-H1573	467101	2524231	1026	2005	Signal
	20190723_TNFRSF21 endogenous_replicate2.tif	W	ß-Actin	NCI-H1648	754951	3115551	1160	2035	Signal
	20190723_TNFRSF21 endogenous_replicate2.tif	W	ß-Actin	NCI-H1993	1322237	4429181	1488	2088	Signal
	20190723_TNFRSF21 endogenous_replicate2.tif	W	ß-Actin	Calu3	719274	4077304	1690	1987	Signal
	20190725_TNFRSF21 endogenous_replicate3.tif	W	TNFRSF21	NCI-H1792_120kDa	47274	4304274	1100	3870	Signal
	20190725_TNFRSF21 endogenous_replicate3.tif	W	TNFRSF21	NCI-H1792_80kDa	10713	3609528	935	3849	Signal
	20190725_TNFRSF21 endogenous_replicate3.tif	W	TNFRSF21	NCI-H1792_42kDa	44878	4390478	1120	3880	Signal
	20190725_TNFRSF21 endogenous_replicate3.tif	W	TNFRSF21	NCI-H2085_120kDa	297144	5123834	1210	3989	Signal
	20190725_TNFRSF21 endogenous_replicate3.tif	W	TNFRSF21	NCI-H2085_80kDa	341070	4998030	1176	3960	Signal
	20190725_TNFRSF21 endogenous_replicate3.tif	W	TNFRSF21	NCI-H2085_42kDa	214096	4794896	1120	4090	Signal
	20190725_TNFRSF21 endogenous_replicate3.tif	W	TNFRSF21	NCI-H1573_120KDa	96570	3746970	936	3900	Signal
	20190725_TNFRSF21 endogenous_replicate3.tif	W	TNFRSF21	NCI-H1573_80kDa	68274	3564154	901	3880	Signal
	20190725_TNFRSF21 endogenous_replicate3.tif	W	TNFRSF21	NCI-H1573_42kDa	954300	5698372	1121	4232	Signal
	20190725_TNFRSF21 endogenous_replicate3.tif	W	TNFRSF21	NCI-H1648_120kDa	188870	4834070	1176	3950	Signal
	20190725_TNFRSF21 endogenous_replicate3.tif	W	TNFRSF21	NCI-H1648_80kDa	177892	4261752	1045	3908	Signal
	20190725_TNFRSF21 endogenous_replicate3.tif	W	TNFRSF21	NCI-H1648_42kDa	64492	4458252	1120	3923	Signal
	20190725_TNFRSF21 endogenous_replicate3.tif	W	TNFRSF21	NCI-H1993_120kDa	471800	6112400	1400	4029	Signal
	20190725_TNFRSF21 endogenous_replicate3.tif	W	TNFRSF21	NCI-H1993_80kDa	321724	4814464	1140	3941	Signal
	20190725_TNFRSF21 endogenous_replicate3.tif	W	TNFRSF21	NCI-H1993_42kDa	244850	4679450	1140	3890	Signal
	20190725_TNFRSF21 endogenous_replicate3.tif	W	TNFRSF21	Calu3_120kDa	787162	7959384	1798	3989	Signal
	20190725_TNFRSF21 endogenous_replicate3.tif	W	TNFRSF21	Calu3_80kDa	273948	5306908	1280	3932	Signal
	20190725_TNFRSF21 endogenous_replicate3.tif	W	TNFRSF21	Calu3_42kDa	13136	4455266	1155	3846	Signal
	20190725_TNFRSF21 endogenous_replicate3.tif	W	ß-Actin	NCI-H1792	147126	1930206	936	1905	Signal
	20190725_TNFRSF21 endogenous_replicate3.tif	W	ß-Actin	NCI-H2085	1661146	4491538	1368	2069	Signal
	20190725_TNFRSF21 endogenous_replicate3.tif	W	ß-Actin	NCI-H1573	357249	2184987	918	1991	Signal
	20190725_TNFRSF21 endogenous_replicate3.tif	W	ß-Actin	NCI-H1648	514923	2610543	1060	1977	Signal
	20190725_TNFRSF21 endogenous_replicate3.tif	W	ß-Actin	NCI-H1993	220515	2250165	1050	1933	Signal
	20190725_TNFRSF21 endogenous_replicate3.tif	W	ß-Actin	Calu3	308234	2322994	1045	1928	Signal
